# Supplementary material for: Early-Onset Colorectal Cancers Exhibit Distinctive Placental-Like Features
Source: Research Square preprint supplement (doi:10.21203/rs.3.rs-7193450/v1), 2025-08-06
Supplement: Supplementary file 1 [file 087a50c2d3766bb5bf898df5.xlsx]

## Sheet: Sup Table 2
Supplementary Table 2: Proteomic profiling of EO-CRC samples in the discovery cohort reveals a distinct overexpression of a placenta-associated signature.

## Sheet: Analysis_1
EOCRC12_PG.Quantity	EOCRC1_PG.Quantity	EOCRC3_PG.Quantity	EOCRC8_PG.Quantity	EOCRC4_PG.Quantity	EOCRC11_PG.Quantity	EOCRC7_PG.Quantity	EOCRC9_PG.Quantity	EOCRC6_PG.Quantity	EOCRC2_PG.Quantity	EOCRC10_PG.Quantity	EOCRC15_PG.Quantity	SOCRC6_PG.Quantity	SOCRC4_PG.Quantity	SOCRC3_PG.Quantity	SOCRC1_PG.Quantity	SOCRC2_PG.Quantity	SOCRC5_PG.Quantity	SOCRC7_PG.Quantity	C: Tissue specificity	N: -Log Student's T-test p-value EOCRC_SOCRC	N: Student's T-test q-value EOCRC_SOCRC	N: Student's T-test Difference EOCRC_SOCRC	Significantly deregulated EOCRC_SOCRC	N: Student's T-test Test statistic EOCRC_SOCRC	T: PG.ProteinGroups	T: PG.NrOfPrecursorsIdentified (Experiment-wide)	T: PG.ProteinDescriptions	T: PG.Genes
15.6733	16.7315	18.0832	18.1522	16.5662	17.8084	17.1701	15.3835	17.091	19.5492	16.3996	16.3159	20.1247	16.7699	17.0292	17.9359	18.0032	18.8954	19.1479	TISSUE SPECIFICITY: Plasma.	1.3186	0.109647	-1.19532	+	-2.13065	P04217	20	Alpha-1B-glycoprotein	A1BG
15.3682	14.9821	11.5974	12.9217	14.2193	16.6028	15.2906	14.4061	15.6961	15.093	13.8218	13.9825	10.5095	15.4272	13.8078	14.4324	15.0313	14.3291	14.0342	TISSUE SPECIFICITY: Widely expressed with highest levels in brain, liver, pancreas, colon and spleen. {ECO:0000269|PubMed:10669759}.	0.372222	0.544323	0.55965		0.818491	Q9NQ94;Q9NQ94-2	13	APOBEC1 complementation factor;Isoform 2 of APOBEC1 complementation factor	A1CF
16.358	16.5785	16.7055	17.4491	15.2492	17.9316	16.214	15.2076	16.0329	17.1304	16.4735	15.4909	18.6732	16.9611	17.7553	16.496	16.5844	17.959	18.3454	TISSUE SPECIFICITY: Secreted in plasma. {ECO:0000269|PubMed:6203908}.	1.91562	0.0426757	-1.13741	+	-2.80625	P01023	95	Alpha-2-macroglobulin	A2M
16.4757	11.4635	14.0824	13.8747	15.121	18.6377	16.2609	15.7848	12.5071	12.1259	15.2897	14.6712	11.2845	16.497	16.1981	17.3311	14.5633	16.4138	15.6793	NA;TISSUE SPECIFICITY: Widely expressed (PubMed:11159947, PubMed:16022285). Particularly abundant in cerebellum, corpus callosum, adrenal gland, pituitary gland, gastrointestinal structures and fetal lung (PubMed:11159947). {ECO:0000269|PubMed:11159947, ECO:0000269|PubMed:16022285}.	0.338759	0.57622	-0.732661		-0.758746	F8VZ44;Q9NRG9;Q9NRG9-2	7	Aladin;Aladin;Isoform 2 of Aladin	AAAS
15.6675	16.3586	15.369	15.9197	15.3484	16.6421	15.7121	15.5602	16.9483	17.1983	15.1271	13.8764	9.40552	15.3733	14.5877	14.7813	14.8247	15.5788	14.4523	TISSUE SPECIFICITY: Highly expressed in kidney, heart and brain, but low in liver. {ECO:0000269|PubMed:12623130}.	1.55538	0.0752557	1.66728	+	2.40512	Q86V21	13	Acetoacetyl-CoA synthetase	AACS
14.9423	14.17	16.5117	16.1354	14.2246	16.8034	14.3426	14.667	13.9727	16.425	14.6754	14.0695	12.3478	13.1046	12.9898	12.6852	13.816	12.5423	12.2464	NA	4.10743	0.00167539	2.25942	+	5.16262	A0A096LP25	9	AP2-associated protein kinase 1 (Fragment)	AAK1
14.7873	15.6042	16.7182	16.925	15.5988	17.6747	15.5082	16.0577	16.9827	14.9843	15.7794	14.3081	15.5636	14.5956	15.8519	15.4328	14.9927	15.2434	16.5514	NA	0.519613	0.423205	0.44907		1.06387	Q9H7C9	8	Mth938 domain-containing protein	AAMDC
13.9105	14.1215	16.0009	16.4924	14.8479	14.3579	13.679	11.9836	12.595	12.7096	11.3351	11.6941	12.6152	11.7892	12.2174	10.8809	10.3338	11.0861	12.5413	NA;TISSUE SPECIFICITY: Expressed in metastatic melanoma, liver, skin, kidney, heart, lung, lymph node, skeletal muscle and brain, and also in A2058 melanoma cells and activated T-cells (at protein level). Expressed in blood vessels. Strongly expressed in endothelial cells, cytotrophoblasts, and poorly differentiated. colon adenocarcinoma cells found in lymphatics. {ECO:0000269|PubMed:10329261, EC…	2.05804	0.0342436	2.00624	+	2.96117	C9JEH3;C9JG97;Q13685	8	Angio-associated migratory cell protein	AAMP
16.79	16.9085	17.3143	17.0667	15.8203	18.4144	16.2538	16.3565	16.8393	17.2735	16.0699	16.5512	16.4092	16.821	16.6235	16.3426	16.6149	16.8128	16.4125	NA	0.38847	0.527871	0.228218		0.846895	P49588;P49588-2	64	Alanine--tRNA ligase, cytoplasmic;Isoform 2 of Alanine--tRNA ligase, cytoplasmic	AARS1
14.7997	15.3442	15.6144	15.9706	14.9898	15.736	14.4222	14.9343	15.205	16.4653	15.2503	13.8628	14.6468	14.2481	14.6442	14.5928	13.648	12.3734	13.4109	NA	2.62066	0.0148753	1.27847	+	3.56269	Q5JTZ9	20	Alanine--tRNA ligase, mitochondrial	AARS2
11.442	12.6703	10.3571	14.2973	10.0207	11.5372	12.085	11.5999	12.1759	10.4601	12.1151	12.9437	15.0752	11.2673	10.466	11.1911	10.2734	10.8263	10.4741	TISSUE SPECIFICITY: Expressed in all 16 tissues examined with highest expression in the liver.	0.289677	0.626335	0.44109		0.667772	Q9UDR5	5	Alpha-aminoadipic semialdehyde synthase, mitochondrial	AASS
14.3172	12.2673	15.8384	12.7335	13.4577	13.973	12.8467	13.561	12.3469	15.9384	13.036	10.3146	10.7312	12.6446	12.9645	12.9448	12.8446	12.376	11.9777	TISSUE SPECIFICITY: Ubiquitously expressed. Expressed at high levels in brain, heart, kidney, placenta and thymus. {ECO:0000269|PubMed:10783144, ECO:0000269|PubMed:11027528}.	0.912849	0.219	1.03111		1.62656	Q9NY61	12	Protein AATF	AATF
15.1465	14.7384	14.1687	18.3073	14.454	13.9514	14.9834	15.4524	16.9288	16.2907	15.4022	15.4809	15.1407	15.5317	14.3123	15.4572	14.4924	14.7123	15.4669	NA;TISSUE SPECIFICITY: Liver > pancreas > brain > kidney > heart > placenta.	0.397801	0.52026	0.425826		0.863039	H3BNQ7;H3BRN4;P80404	8	4-aminobutyrate aminotransferase, mitochondrial;4-aminobutyrate aminotransferase, mitochondrial;4-aminobutyrate aminotransferase, mitochondrial	ABAT
12.1232	11.0387	13.7341	13.8511	12.6197	12.1739	13.6736	13.3464	16.0836	14.1147	14.9545	10.917	12.8642	11.6291	15.5648	15.3996	16.7167	10.9976	15.087	NA;TISSUE SPECIFICITY: Widely expressed with higher expression in heart, skeletal muscle and liver (PubMed:12379217, PubMed:28882873, PubMed:29300488). Highly expressed in the superior frontal white matter and inferior temporal white matter (PubMed:12379217). {ECO:0000269|PubMed:12379217, ECO:0000269|PubMed:28882873, ECO:0000269|PubMed:29300488}.	0.455521	0.472843	-0.817795		-0.960368	A0A0A0MSU4;O94911-3	18	ATP-binding cassette sub-family A member 8;Isoform 3 of ATP-binding cassette sub-family A member 8	ABCA8
15.0395	12.6729	14.2176	16.631	12.2671	15.0148	13.6354	13.3027	14.7625	14.471	14.1561	11.9703	11.8959	11.7569	12.5434	13.9338	10.8138	11.0384	11.8133	TISSUE SPECIFICITY: Expressed in liver, kidney, small intestine and brain.	2.54135	0.0166863	2.04097	+	3.47848	P08183	18	ATP-dependent translocase ABCB1	ABCB1
15.1095	14.4918	15.4529	17.3303	15.2291	16.0253	14.9633	14.6531	16.9164	14.9549	14.8622	15.1362	13.6891	14.7088	14.4304	14.7128	12.4238	14.5289	14.2562	TISSUE SPECIFICITY: Ubiquitous. Highly expressed in bone marrow, expressed at intermediate to high levels in skeletal muscle, small intestine, thyroid, heart, brain, placenta, liver, pancreas, prostate, testis, ovary, leukocyte, stomach, spinal cord, lymph node, trachea and adrenal gland, and low levels are found in lung, kidney, spleen, thymus and colon.	2.2908	0.0237772	1.31995	+	3.21151	Q9NRK6	12	ATP-binding cassette sub-family B member 10, mitochondrial	ABCB10
15.3556	16.3904	15.6628	18.1386	15.7566	17.4925	15.8855	15.8315	16.2003	15.957	16.0228	15.3886	15.8843	15.1011	14.8116	14.5864	12.4288	17.6045	13.8087	NA	1.46635	0.0867018	1.28416	+	2.30316	A0A5F9ZA98;O75027;O75027-2	13	ATP-binding cassette sub-family B member 7, mitochondrial;ATP-binding cassette sub-family B member 7, mitochondrial;Isoform 2 of ATP-binding cassette sub-family B member 7, mitochondrial	ABCB7
14.9457	14.2834	16.0877	16.0717	14.5575	11.1055	13.5778	14.5849	13.0345	16.9689	14.1258	14.0754	11.9052	13.572	10.9524	13.3077	10.7708	12.5469	13.6473	TISSUE SPECIFICITY: Ubiquitous.	2.12187	0.030939	2.06552	+	3.03012	Q9NUT2;Q9NUT2-2;Q9NUT2-3;Q9NUT2-4;Q9NUT2-5	4	Mitochondrial potassium channel ATP-binding subunit;Isoform 2 of Mitochondrial potassium channel ATP-binding subunit;Isoform 3 of Mitochondrial potassium channel ATP-binding subunit;Isoform 4 of Mitochondrial potassium channel ATP-binding subunit;Isoform 5 of Mitochondrial potassium channel ATP-binding subunit	ABCB8
15.1252	15.2814	16.5886	17.0535	15.7655	15.6094	14.7377	15.8614	12.6565	15.516	14.1208	14.7198	14.0439	14.7313	14.8589	14.8529	13.7673	11.1594	14.3111	NA;TISSUE SPECIFICITY: Lung, testis and peripheral blood mononuclear cells.	1.42582	0.0929644	1.29233	+	2.25628	I3L4X2;P33527;P33527-9	23	Multidrug resistance-associated protein 1 (Fragment);Multidrug resistance-associated protein 1;Isoform 9 of Multidrug resistance-associated protein 1	ABCC1
14.9501	16.1125	15.1782	14.1961	15.2806	18.6172	15.8227	16.1616	16.734	15.545	16.1939	10.419	11.1213	15.0295	16.2722	14.8096	15.3342	15.9696	9.42616	TISSUE SPECIFICITY: Expressed in testis (at protein level). Widely expressed at low level (PubMed:11483364, PubMed:11688999, PubMed:12011458, PubMed:17472575). Isoform 5 is specifically expressed in brain, testis and breast cancer cells (PubMed:11483364, PubMed:11688999, PubMed:12011458). {ECO:0000269|PubMed:11483364, ECO:0000269|PubMed:11688999, ECO:0000269|PubMed:12011458, ECO:0000269|PubMed:17…	0.728681	0.297986	1.43959		1.37569	Q96J65;Q96J65-2;Q96J65-3;Q96J65-5	1	Multidrug resistance-associated protein 9;Isoform 2 of Multidrug resistance-associated protein 9;Isoform 3 of Multidrug resistance-associated protein 9;Isoform 5 of Multidrug resistance-associated protein 9	ABCC12
15.1851	15.817	15.9777	17.6876	15.6544	16.397	15.6978	15.6311	16.8509	16.9366	15.6176	14.5761	16.338	14.7001	15.1739	14.5506	14.6757	15.3981	14.0304	TISSUE SPECIFICITY: Mainly expressed in the liver. Also expressed in small intestine, colon, prostate, testis, brain and at a lower level in the kidney. {ECO:0000269|PubMed:10094960, ECO:0000269|PubMed:9738950}.	1.7766	0.0536212	1.02144	+	2.65328	O15438;O15438-4	50	Canalicular multispecific organic anion transporter 2;Isoform 4 of Canalicular multispecific organic anion transporter 2	ABCC3
15.5026	15.2354	17.2882	17.7798	15.8341	15.1943	15.4539	15.0508	17.1807	16.4923	15.5515	15.8793	14.3861	14.9733	11.4963	12.3591	12.5238	11.2877	14.3175	TISSUE SPECIFICITY: Widely expressed, with particularly high levels in prostate, but is barely detectable in liver. sinusoidal membrane of hepatocytes.	4.34859	0.00106122	2.9878	+	5.43232	O15439;O15439-2	23	Multidrug resistance-associated protein 4;Isoform 2 of Multidrug resistance-associated protein 4	ABCC4
15.7081	15.177	16.2883	16.1814	15.8249	16.7568	15.2883	15.8753	16.2858	16.6461	15.7713	14.7081	15.5429	15.683	14.5532	14.9945	14.3973	14.8817	14.9735	NA	2.33675	0.0222796	0.872239	+	3.26062	A0A3B3ITW3;P28288	28	ATP-binding cassette sub-family D member 3	ABCD3
11.6029	10.9812	12.9227	12.5331	12.2819	11.8167	11.2218	12.5357	12.771	14.1408	11.9915	10.6582	11.062	11.1029	12.5178	10.3348	9.61263	11.5031	11.1374	TISSUE SPECIFICITY: Ubiquitous.	1.56577	0.0740119	1.0828	+	2.41693	O14678	4	Lysosomal cobalamin transporter ABCD4	ABCD4
16.4674	16.7181	15.4434	16.7463	16.7432	18.3623	15.916	16.0695	16.1991	17.1873	15.6336	16.8499	16.1807	17.127	16.6679	16.2393	16.636	16.6972	16.0987	NA	0.00766008	0.986311	0.00703094		0.0222385	P61221	37	ATP-binding cassette sub-family E member 1	ABCE1
16.3577	16.1979	16.9854	16.7175	16.1183	16.0593	15.5513	15.4382	16.1696	16.2726	15.4928	15.4599	14.8291	15.4347	15.0694	14.8535	16.2151	15.8507	15.0692	TISSUE SPECIFICITY: Ubiquitous. {ECO:0000269|PubMed:9790762}.	2.11557	0.031248	0.736707	+	3.02333	Q8NE71	33	ATP-binding cassette sub-family F member 1	ABCF1
16.0571	15.4085	17.7024	18.8605	16.3508	17.844	14.9486	15.2824	15.8444	17.0776	14.9393	15.1163	14.6784	15.3739	14.5112	14.8488	14.8354	15.5927	14.8566	NA	1.73265	0.0574495	1.3293	+	2.60448	Q9UG63;Q9UG63-2	22	ATP-binding cassette sub-family F member 2;Isoform 2 of ATP-binding cassette sub-family F member 2	ABCF2
14.6566	14.4214	15.4927	15.0373	15.4162	17.4511	14.4313	15.2512	14.6035	14.9903	14.913	13.282	14.2436	14.749	13.2443	13.6731	13.7039	14.2846	12.965	NA	1.92177	0.0422244	1.15789	+	2.81297	Q9NUQ8	17	ATP-binding cassette sub-family F member 3	ABCF3
15.8832	16.9611	17.5587	17.1639	16.041	18.7725	16.7047	16.8347	17.2516	17.9765	16.3074	17.0247	17.1548	16.0114	15.2161	15.8064	15.3169	15.1809	16.065	NA	2.38862	0.0206861	1.21836	+	3.31597	Q9NUJ1	18	Mycophenolic acid acyl-glucuronide esterase, mitochondrial	ABHD10
16.109	16.2935	15.5242	15.2479	16.3925	17.5267	16.2712	17.1817	16.6931	15.7347	17.3507	14.77	15.6456	16.3217	15.7968	16.6791	14.6961	16.0751	15.5757	TISSUE SPECIFICITY: Ubiquitously expressed. {ECO:0000269|PubMed:12073013}.	0.582379	0.380956	0.43078		1.16124	Q8NFV4	31	Protein ABHD11	ABHD11
15.9168	14.5747	16.747	18.087	15.6852	15.5983	15.8656	15.2237	15.3188	15.6081	14.5002	14.517	14.3448	13.1807	13.3278	15.2901	14.5034	14.8402	14.1755	NA	2.23469	0.0257921	1.39935	+	3.15142	Q8N2K0	17	Lysophosphatidylserine lipase ABHD12	ABHD12
17.424	17.9535	18.6486	19.5247	17.7828	18.832	17.7231	18.0358	17.1337	17.3119	17.8469	16.6517	17.6771	17.9991	16.7419	16.4605	17.629	17.6621	16.3283	TISSUE SPECIFICITY: Ubiquitous. Detected in spleen, thymus, prostate, testis, ovary, small intestine, colon, peripheral blood leukocyte, heart, placenta, lung, liver, skeletal muscle, pancreas and kidney. {ECO:0000269|PubMed:14672934}.	1.15367	0.144088	0.691717		1.93202	Q96IU4	13	Protein ABHD14B	ABHD14B
13.6975	12.879	15.2231	13.6885	13.8829	13.4162	12.2412	12.5365	13.9656	15.6187	13.1565	11.8459	11.3348	10.8967	11.3728	10.4329	10.3131	10.7635	11.0345	NA	4.8128	0.000378947	2.63431	+	5.96421	Q6UXT9	3	Protein ABHD15	ABHD15
14.8098	15.9307	17.2952	15.564	15.7748	17.0014	15.4446	15.1087	15.6222	16.9149	15.5115	14.1173	14.7852	14.214	14.188	13.9814	14.0827	14.7158	14.1261	NA	3.01144	0.0084735	1.45889	+	3.97728	A0A0G2JJD3;O95870	16	HLA-B associated transcript 5, isoform CRA_b;Phosphatidylserine lipase ABHD16A	ABHD16A
15.0339	12.9636	13.6616	12.473	14.8014	13.3586	13.2816	13.7624	14.1575	15.5969	12.8823	14.1287	13.7208	13.3425	10.5957	12.9227	11.4433	9.39209	13.5856	NA	1.94936	0.0402273	1.69853	+	2.8431	Q9BV23	6	Monoacylglycerol lipase ABHD6	ABHD6
15.8372	15.6533	16.7046	19.7844	15.2647	17.2333	15.9312	15.9989	15.8069	17.9816	16.1667	14.7611	15.38	15.3516	14.8779	14.6995	15.8012	15.4589	14.7988	NA;TISSUE SPECIFICITY: Widely expressed, with highest expression in brain. {ECO:0000269|PubMed:11418237}.	1.47203	0.0859735	1.23158	+	2.30971	A0A0A0MRT6;Q8IZP0;Q8IZP0-2;Q8IZP0-3;Q8IZP0-4;Q8IZP0-5;Q8IZP0-6;Q8IZP0-9	26	Abl interactor 1;Abl interactor 1;Isoform 2 of Abl interactor 1;Isoform 3 of Abl interactor 1;Isoform 4 of Abl interactor 1;Isoform 5 of Abl interactor 1;Isoform 6 of Abl interactor 1;Isoform 9 of Abl interactor 1	ABI1
12.8064	13.3027	13.8875	15.4555	12.4327	13.779	12.488	11.9092	12.9734	13.4769	12.4449	13.3276	11.044	12.2135	9.39543	12.2601	11.7233	10.7922	11.5877	NA;TISSUE SPECIFICITY: Widely expressed. Abundant in testes, ovary, thymus, and colon, with lower but detectable levels in prostate, peripheral blood leukocytes, and spleen. {ECO:0000269|PubMed:7590236}.	3.20971	0.00633766	1.90227	+	4.1883	A0A0C4DG21;E7EP65;E7EW77;F8WAL6;Q9NYB9;Q9NYB9-2;Q9NYB9-4	2	Abl interactor 2;Abl interactor 2 (Fragment);Abl interactor 2;Abl interactor 2;Abl interactor 2;Isoform 2 of Abl interactor 2;Isoform 4 of Abl interactor 2	ABI2
13.9939	10.906	14.3845	15.431	13.0367	13.4474	14.4553	12.783	14.3523	15.6559	13.4625	13.3602	12.8077	9.50095	12.4884	11.3533	11.796	11.2565	11.0752	TISSUE SPECIFICITY: Expressed in heart, lung, liver, pancreas, kidney, placenta and at low levels in brain and skeletal muscle. {ECO:0000269|PubMed:10978530}.	3.05415	0.00801495	2.30411	+	4.02267	Q9P2A4	7	ABI gene family member 3	ABI3
13.8922	16.1044	12.8102	15.7928	10.8975	12.484	16.9055	15.4556	15.5084	15.9043	17.1321	15.3534	15.3766	15.2784	14.3601	13.8269	14.1314	15.6031	16.9406	NA;TISSUE SPECIFICITY: Expressed in brain, heart, lung, liver, pancreas kidney and placenta. {ECO:0000269|PubMed:11501947}.	0.105571	0.846057	-0.2205		-0.278215	D3YTG3;H7C556;Q7Z7G0	17	Target of Nesh-SH3	ABI3BP
11.7404	9.94674	14.1753	12.0634	13.9193	13.2905	13.4825	12.0937	12.6221	14.9925	13.2962	11.6616	10.8945	10.3935	10.771	10.4173	11.7463	10.4205	10.2256	TISSUE SPECIFICITY: Widely expressed.	2.87144	0.010311	2.07816	+	3.82868	P00519;P00519-2	5	Tyrosine-protein kinase ABL1;Isoform IB of Tyrosine-protein kinase ABL1	ABL1
15.2285	15.1904	15.4457	16.4178	16.2955	16.7874	15.4122	15.8633	15.9039	16.6905	15.6508	14.8048	13.8946	15.4842	15.4086	14.2923	15.473	15.027	14.962	NA;TISSUE SPECIFICITY: Detected in liver, heart, skeletal muscle, brain and retina, where it is concentrated in the inner segment and in the outer plexiform layers. {ECO:0000269|PubMed:9245787}.	2.02062	0.0362638	0.87306	+	2.92062	A0A3B3IS55;O14639;O14639-2	24	Actin-binding LIM protein 1;Actin-binding LIM protein 1;Isoform 2 of Actin-binding LIM protein 1	ABLIM1
16.0738	11.2313	16.8815	14.1426	15.1536	15.4581	15.7575	15.9179	15.4244	17.9557	15.5692	10.754	10.7637	13.2774	10.8861	13.4892	10.6718	14.2775	10.9926	NA	2.32409	0.0226785	2.97544	+	3.2471	A0A087X009;A0A087X0C2;P16442	16	Histo-blood group ABO system transferase	ABO
14.4901	14.0692	14.2086	13.9323	13.3517	15.6444	14.0942	13.9374	15.1771	14.4217	13.7723	13.6104	13.2038	14.4464	13.9339	13.3719	13.6649	13.9249	14.2823	NA;TISSUE SPECIFICITY: Highly enriched in the brain. Much weaker expression in heart, lung and muscle.	0.755323	0.284815	0.393206		1.41314	A0A0G2JQ41;A0A1C7CYZ0;Q12979;Q12979-2;Q12979-4	16	Active breakpoint cluster region-related protein (Fragment);Active breakpoint cluster region-related protein;Active breakpoint cluster region-related protein;Isoform Short of Active breakpoint cluster region-related protein;Isoform 4 of Active breakpoint cluster region-related protein	ABR
18.4011	15.8277	17.9834	13.9547	18.0663	18.2559	16.3224	19.1792	17.2423	15.7748	17.7108	16.8322	17.9159	18.0041	15.7567	15.5177	18.8928	18.1816	15.0603	NA	0.0414514	0.936338	0.0822058		0.116056	Q9P1F3	10	Costars family protein ABRACL	ABRACL
13.0683	12.7757	15.1988	12.9061	14.4555	15.8063	13.3198	12.9144	14.2045	14.534	12.9068	13.4875	13.6041	13.3479	13.0764	13.0443	13.2967	14.1184	13.3479	TISSUE SPECIFICITY: Detected in heart muscle (at protein level). Detected in heart and muscle, and at much lower levels in brain (PubMed:21195082). {ECO:0000269|PubMed:21195082}.	0.464446	0.465884	0.393051		0.975053	Q15018	15	BRISC complex subunit Abraxas 2	ABRAXAS2
16.5334	15.3137	18.8752	13.6501	16.9557	18.4223	16.4168	15.9187	16.9195	18.0206	15.6273	15.994	17.1023	16.4911	15.916	15.7625	16.5553	16.8503	16.5361	NA	0.0608011	0.907373	0.0948538		0.166977	P09110	25	3-ketoacyl-CoA thiolase, peroxisomal	ACAA1
17.3262	17.386	18.6232	18.3322	17.208	19.852	17.8754	18.0668	17.9794	17.7268	18.4385	17.1945	16.8566	17.5991	17.9809	17.3777	17.162	17.6039	17.8585	NA	0.923724	0.215112	0.50948		1.64084	P42765	46	3-ketoacyl-CoA thiolase, mitochondrial	ACAA2
14.3862	14.9288	15.2327	15.6239	14.7251	15.2425	13.5056	13.6757	14.7064	15.1966	13.063	13.4833	14.4039	14.4224	13.8762	13.71	13.4642	13.292	12.6537	expressed at low level in pulmonary tissue;not detected in the liver.;TISSUE SPECIFICITY: Expressed in brain, placenta, skeletal muscle, renal, pancreatic and adipose tissues	1.32989	0.107783	0.791909	+	2.144	Q13085;Q13085-2;Q13085-3;Q13085-4	44	Acetyl-CoA carboxylase 1;Isoform 2 of Acetyl-CoA carboxylase 1;Isoform 3 of Acetyl-CoA carboxylase 1;Isoform 4 of Acetyl-CoA carboxylase 1	ACACA
14.2606	11.4617	13.2765	12.149	11.9154	12.3356	10.377	12.8587	13.8512	13.6876	12.8138	11.1161	11.1576	10.4908	10.9481	12.0747	10.2952	10.8708	10.4802	TISSUE SPECIFICITY: Widely expressed with highest expression in fetal brain, followed by heart, muscle, kidney and adult brain. Expression levels varying from isoform to isoform. {ECO:0000269|PubMed:15560374, ECO:0000269|PubMed:21237683}.	2.4169	0.0199111	1.60611	+	3.3461	Q6JQN1;Q6JQN1-2;Q6JQN1-5	5	Acyl-CoA dehydrogenase family member 10;Isoform 2 of Acyl-CoA dehydrogenase family member 10;Isoform 5 of Acyl-CoA dehydrogenase family member 10	ACAD10
12.602	12.4333	12.6682	13.7934	12.853	13.9511	11.6157	11.8444	12.5448	12.1595	11.2071	13.6038	13.2778	11.3665	12.8461	11.3868	12.2614	13.1292	11.2855	TISSUE SPECIFICITY: Widely expressed with highest levels in brain followed by liver, heart and kidney. {ECO:0000269|PubMed:21237683}.	0.441161	0.484624	0.384463		0.936544	Q709F0;Q709F0-3	1	Acyl-CoA dehydrogenase family member 11;Isoform 3 of Acyl-CoA dehydrogenase family member 11	ACAD11
15.4877	15.5874	16.7837	18.4066	16.2537	17.8047	16.0324	16.9386	17.0523	18.7984	16.5649	15.958	16.5061	15.2579	15.7981	14.7269	15.2848	16.2477	15.9027	TISSUE SPECIFICITY: Detected at comparable levels in all tissues examined (heart, lung, brain, skeletal muscle, pancreas and placenta). Weakly expressed in liver and kidney.	1.6806	0.0621337	1.13083	+	2.54639	Q9UKU7	17	Isobutyryl-CoA dehydrogenase, mitochondrial	ACAD8
16.2874	16.1123	16.1191	16.8734	16.0054	16.6076	15.0628	15.9118	15.7166	17.0706	15.4616	15.7999	15.3274	15.737	14.9908	15.1485	13.889	15.3019	15.1169	TISSUE SPECIFICITY: Ubiquitously expressed in most normal human tissues and cancer cell lines with high level of expression in heart, skeletal muscles, brain, kidney and liver (PubMed:12359260). In the cerebellum uniquely expressed in the granular layer (at protein level) (PubMed:21237683). {ECO:0000269|PubMed:12359260, ECO:0000269|PubMed:21237683}.	2.76878	0.0119836	1.01263	+	3.7198	Q9H845	32	Complex I assembly factor ACAD9, mitochondrial	ACAD9
16.2704	16.2718	16.1229	15.9756	15.5116	17.4692	17.8229	17.1177	17.5438	16.8538	17.7483	14.9996	16.1932	16.2368	17.7435	16.9356	14.9107	15.457	17.1706	NA	0.248067	0.67139	0.264116		0.587104	P16219	29	Short-chain specific acyl-CoA dehydrogenase, mitochondrial	ACADS
16.3902	16.5018	16.558	16.6793	16.9546	17.7261	16.9759	16.9696	17.2846	17.1255	16.6463	16.4373	17.707	15.6627	16.0549	16.3064	15.8542	14.8576	16.3442	TISSUE SPECIFICITY: Ubiquitously expressed. {ECO:0000269|PubMed:8660691}.	1.71038	0.0594867	0.741695	+	2.57967	P45954	18	Short/branched chain specific acyl-CoA dehydrogenase, mitochondrial	ACADSB
17.4174	17.917	18.8783	18.9576	16.9917	18.341	18.1437	18.248	17.8675	18.8848	18.2339	17.8425	16.6428	16.5723	16.4859	16.831	15.5105	16.1351	17.7317	NA	4.26631	0.00116049	1.58515	+	5.33984	P49748;P49748-3	59	Very long-chain specific acyl-CoA dehydrogenase, mitochondrial;Isoform 3 of Very long-chain specific acyl-CoA dehydrogenase, mitochondrial	ACADVL
13.779	14.446	15.2335	14.0966	13.1165	11.3276	13.6383	12.8413	15.2678	15.1437	13.5941	10.8659	11.512	11.0862	11.2208	12.4174	12.6635	13.7751	11.2164	TISSUE SPECIFICITY: Highest level in lung and spleen. Low level in heart, kidney, liver and pancreas. {ECO:0000269|PubMed:11062263}.	1.77507	0.0537606	1.62803	+	2.65158	Q15027	6	Arf-GAP with coiled-coil, ANK repeat and PH domain-containing protein 1	ACAP1
14.8304	14.8832	15.5927	15.7926	14.4837	15.5504	14.8334	14.3967	15.8803	16.0026	13.9528	14.4241	14.5185	13.7218	13.7084	13.8914	13.9264	13.9095	14.1559	TISSUE SPECIFICITY: Widely expressed. Highest level in lung. {ECO:0000269|PubMed:11062263}.	2.96591	0.00912162	1.0759	+	3.92892	Q15057	18	Arf-GAP with coiled-coil, ANK repeat and PH domain-containing protein 2	ACAP2
16.5388	17.4545	16.4468	15.8945	16.6943	19.127	16.148	16.3199	17.1134	17.4516	15.8485	15.6713	16.2574	18.1579	17.5097	16.5141	16.8785	16.5467	15.8152	NA	0.0733092	0.889151	-0.0856166		-0.19893	Q9BWD1	26	Acetyl-CoA acetyltransferase, cytosolic	ACAT2
16.3052	16.4	16.938	17.185	16.2834	17.916	16.4194	16.3428	16.2183	17.115	16.1442	16.0109	15.9096	15.89	15.462	14.8607	16.2071	15.9342	15.209	TISSUE SPECIFICITY: Ubiquitous, with highest expression in testis and ovary. {ECO:0000269|PubMed:11590181}.	2.85379	0.0106287	0.967599	+	3.80995	Q9H3P7	23	Golgi resident protein GCP60	ACBD3
14.9163	14.4201	15.8991	15.8001	14.5648	17.8925	14.4228	15.4203	14.8424	16.1495	14.6613	13.9371	11.0949	14.5348	14.0593	14.4723	12.7124	12.887	13.5043	NA	2.6368	0.0146442	1.92028	+	3.57982	B7Z2R7;Q5T8D3-2;Q5T8D3-3	12	Acyl-CoA-binding domain-containing protein 5;Isoform 2 of Acyl-CoA-binding domain-containing protein 5;Isoform 3 of Acyl-CoA-binding domain-containing protein 5	ACBD5
11.9237	11.6582	17.6532	13.5013	14.6217	16.0379	11.2538	11.6712	12.6833	12.3746	12.1179	13.6536	10.0807	14.6238	13.7525	15.1473	13.3613	12.3012	14.6808	TISSUE SPECIFICITY: Detected in placenta and spleen (at protein level). Detected in placenta, umbilical cord blood, CD34-positive hematopoietic progenitor cells and bone marrow. {ECO:0000269|PubMed:18268358}.	0.0643395	0.902112	-0.158568		-0.17609	Q9BR61	3	Acyl-CoA-binding domain-containing protein 6	ACBD6
14.3139	13.3332	14.3999	14.6087	12.5473	13.1617	13.7033	13.368	13.0377	15.0482	13.1687	14.2645	14.1864	12.8389	13.4643	12.505	12.3644	14.6976	14.1161	NA;TISSUE SPECIFICITY: Ubiquitously expressed, with highest levels in lung, kidney, heart, gastrointestinal system and prostate. Isoform Testis-specific is expressed in spermatocytes and adult testis. {ECO:0000269|PubMed:10924499, ECO:0000269|PubMed:10969042, ECO:0000269|PubMed:12459472, ECO:0000269|PubMed:15671045}.	0.335694	0.579044	0.293013		0.753185	A0A0A0MSN4;P12821	6	Angiotensin-converting enzyme	ACE
17.2213	18.1319	17.9859	17.2487	17.1157	18.8529	16.9877	16.8818	17.2704	17.9602	16.594	16.8418	17.1892	17.4084	17.32	16.9327	17.6988	17.628	16.7471	NA	0.22896	0.690935	0.14949		0.548834	P53396	60	ATP-citrate synthase	ACLY
16.69	17.0715	16.7399	17.0158	16.8759	18.6147	17.2179	17.287	18.125	17.4125	16.9375	16.8262	17.3968	16.689	17.2806	17.0184	17.581	17.2362	17.7777	NA	0.0726588	0.890007	-0.0482918		-0.197286	P21399	56	Cytoplasmic aconitate hydratase	ACO1
16.7036	17.901	17.731	16.9567	16.8873	19.0039	18.3927	18.018	19.0548	18.5582	18.3415	17.7058	17.863	18.0755	17.3661	17.5642	16.7497	16.5346	18.0091	NA	0.746323	0.289308	0.486146		1.40054	A2A274;Q99798	91	Aconitate hydratase, mitochondrial;Aconitate hydratase, mitochondrial	ACO2
13.5468	13.0505	11.3209	12.7554	13.0175	14.5945	12.8859	13.2401	14.3753	13.617	13.1348	11.7057	10.64	13.1395	11.906	11.9601	13.1015	13.1444	12.1338	TISSUE SPECIFICITY: Isoform 1 is predominantly expressed in skeletal muscle, liver, testis, stomach, spleen, lung and brain. Isoform 2 is predominantly expressed in kidney, uterus, hibernoma and white adipose tissue.	1.07837	0.16324	0.814406		1.83873	Q8WXI4-2	15	Isoform 2 of Acyl-coenzyme A thioesterase 11	ACOT11
17.6473	19.3159	18.5107	18.4828	18.4249	10.714	18.5513	18.6129	12.942	12.8234	18.5545	14.7188	15.3107	17.4746	17.4819	15.8685	18.0965	17.7915	17.6991	NA	0.16864	0.764567	-0.495011		-0.422153	Q9NPJ3	7	Acyl-coenzyme A thioesterase 13	ACOT13
15.9929	17.4132	18.7905	18.524	16.6571	18.2566	17.7919	17.9197	18.8679	18.9657	17.9215	17.2253	17.2576	16.1966	16.2061	17.6569	16.1389	15.7892	17.9161	NA	1.76612	0.054523	1.12319	+	2.64166	A0A087X0W7	24	Acyl-coenzyme A thioesterase 2, mitochondrial	ACOT2
16.3587	16.0898	16.6088	16.9054	16.4038	18.5448	15.6626	15.9426	15.7796	16.1927	15.4214	15.2351	15.2015	17.2478	16.5457	16.1217	16.1542	15.2408	15.092	TISSUE SPECIFICITY: Isoform 4 is expressed exclusively in brain. {ECO:0000269|PubMed:12435388}.	0.357237	0.55772	0.318729		0.791949	O00154;O00154-4;O00154-6;O00154-7	24	Cytosolic acyl coenzyme A thioester hydrolase;Isoform 4 of Cytosolic acyl coenzyme A thioester hydrolase;Isoform 6 of Cytosolic acyl coenzyme A thioester hydrolase;Isoform 7 of Cytosolic acyl coenzyme A thioester hydrolase	ACOT7
14.635	15.1012	14.6493	17.5969	14.5137	17.0339	15.0403	14.7197	13.9308	14.2505	14.5131	13.805	14.3732	16.0509	14.3285	15.4102	14.7057	15.4511	13.1205	TISSUE SPECIFICITY: Detected in a T-cell line (at protein level). Ubiquitous (PubMed:9153233, PubMed:9299485). {ECO:0000269|PubMed:9153233, ECO:0000269|PubMed:9299485}.	0.15576	0.78125	0.205277		0.393809	O14734	9	Acyl-coenzyme A thioesterase 8	ACOT8
16.172	16.3231	17.9016	18.4089	16.8614	16.6445	16.2486	16.7859	16.891	18.8098	16.5401	16.5604	16.4988	16.0789	15.8088	16.6158	15.5345	16.2582	16.1644	NA	1.63617	0.0670442	0.875235	+	2.49652	Q9Y305;Q9Y305-2;Q9Y305-4	34	Acyl-coenzyme A thioesterase 9, mitochondrial;Isoform 2 of Acyl-coenzyme A thioesterase 9, mitochondrial;Isoform 4 of Acyl-coenzyme A thioesterase 9, mitochondrial	ACOT9
16.0578	15.0032	17.4033	17.2656	15.9663	17.2192	15.1611	15.7911	16.49	16.9417	15.5002	15.0877	16.202	16.4434	15.5608	15.532	15.1269	16.297	16.0066	TISSUE SPECIFICITY: Widely expressed with highest levels of isoform 1 and isoform 2 detected in testis. Isoform 1 is expressed at higher levels than isoform 2 in liver and kidney while isoform 2 levels are higher in brain, lung, muscle, white adipose tissue and testis. Levels are almost equal in heart. {ECO:0000269|PubMed:17603022, ECO:0000269|PubMed:20195242}.	0.335248	0.57925	0.276031		0.752375	Q15067	42	Peroxisomal acyl-coenzyme A oxidase 1	ACOX1
14.5937	10.729	15.6614	16.3551	13.6612	13.427	12.9718	13.551	13.0562	17.2238	13.6419	10.5477	13.5798	12.509	12.1761	12.5616	12.2274	12.0487	11.4046	NA	1.05943	0.169372	1.42681		1.81498	O15254	8	Peroxisomal acyl-coenzyme A oxidase 3	ACOX3
15.9127	17.0596	18.9064	16.2355	15.9213	17.5024	15.8615	15.3775	15.7736	17.3824	15.9528	14.9807	16.1951	16.219	16.5746	15.3386	15.5847	16.7624	14.5368	TISSUE SPECIFICITY: T-lymphocytes express only isoform 2. {ECO:0000269|PubMed:9038134}.	0.536139	0.412034	0.518229		1.08987	P24666	8	Low molecular weight phosphotyrosine protein phosphatase	ACP1
17.0001	15.8262	18.0605	17.41	15.4573	15.8314	15.5924	15.7013	15.9431	16.939	16.0726	14.419	16.3266	14.6796	14.8792	15.1456	12.6107	15.0879	14.0637	NA	2.11326	0.0314044	1.503	+	3.02085	A0A5F9ZHR7;P11117	8	Lysosomal acid phosphatase	ACP2
14.2515	17.4434	12.9858	14.0082	14.9423	14.1719	15.0212	13.7514	15.1781	15.479	12.8546	12.9228	14.1445	12.5356	13.514	12.9389	13.7732	13.4251	12.7161	TISSUE SPECIFICITY: [Isoform 2]: Widely expressed. Expressed in the sarcolemma of skeletal muscle. {ECO:0000269|PubMed:17638863}.;TISSUE SPECIFICITY: Highly expressed in the prostate, restricted to glandular and ductal epithelial cells. Also expressed in bladder, kidney, pancreas, lung, cervix, testis and ovary. Weak expression in a subset of pancreatic islet cells, squamous epithelia, the pilose…	1.3175	0.109792	1.12503	+	2.12935	P15309;P15309-2	11	Prostatic acid phosphatase;Isoform 2 of Prostatic acid phosphatase	ACP3
13.4864	13.0721	13.171	18.5928	12.3533	13.6468	12.7369	14.2259	13.3079	13.3974	11.7169	11.9686	12.3177	12.7967	12.3274	11.8051	13.6148	12.2344	12.6106	TISSUE SPECIFICITY: Highly expressed in kidney, heart, small intestine, muscle, liver, prostate, testis, ovary and weakly expressed in thymus and colon. {ECO:0000269|PubMed:10506173, ECO:0000269|PubMed:12010880}.	0.717352	0.303647	0.943475		1.35962	Q9NPH0	10	Lysophosphatidic acid phosphatase type 6	ACP6
15.81	15.7702	16.3358	17.5773	14.9963	16.1106	16.1635	16.5904	16.9264	16.806	16.4975	15.6844	15.3156	16.1049	15.1959	15.9	14.495	15.278	14.9651	NA	2.23654	0.0257221	0.950294	+	3.15341	Q4G176	19	Malonate--CoA ligase ACSF3, mitochondrial	ACSF3
16.7953	16.4013	18.9743	19.1789	16.9151	17.2013	15.8194	16.8822	16.8427	18.8403	16.1356	16.3617	18.4286	16.6097	16.9314	15.7976	15.7513	17.6019	17.0834	NA;TISSUE SPECIFICITY: Highly expressed in liver, heart, skeletal muscle, kidney and erythroid cells, and to a lesser extent in brain, lung, placenta and pancreas. {ECO:0000269|PubMed:10548543}.	0.253794	0.665219	0.309388		0.59842	E7EPM6;P33121;P33121-2;P33121-3	26	Long-chain-fatty-acid--CoA ligase 1;Long-chain-fatty-acid--CoA ligase 1;Isoform 2 of Long-chain-fatty-acid--CoA ligase 1;Isoform 3 of Long-chain-fatty-acid--CoA ligase 1	ACSL1
16.507	16.4311	17.3529	17.1971	16.9429	17.897	16.0092	15.6928	16.5555	17.4594	15.4624	15.6646	15.5866	15.7988	15.4037	15.2555	15.446	16.6108	15.4899	NA	1.97702	0.0385581	0.941777	+	2.87324	O95573	26	Long-chain-fatty-acid--CoA ligase 3	ACSL3
15.0858	16.1012	16.4652	17.2663	15.304	17.2303	15.3426	15.1431	15.318	16.2218	14.5131	15.8468	15.9379	16.1146	15.1319	15.0506	14.9025	15.8092	15.347	NA	0.46691	0.46404	0.349311		0.979092	O60488;O60488-2	26	Long-chain-fatty-acid--CoA ligase 4;Isoform Short of Long-chain-fatty-acid--CoA ligase 4	ACSL4
16.8442	15.3178	16.8756	18.3199	18.0783	17.5508	17.3766	17.8134	17.6858	18.1225	17.2799	15.7376	16.2363	17.9436	16.9881	17.3167	16.0412	17.4516	16.2948	NA	0.397908	0.52025	0.354159		0.863224	Q9ULC5;Q9ULC5-3	36	Long-chain-fatty-acid--CoA ligase 5;Isoform 2 of Long-chain-fatty-acid--CoA ligase 5	ACSL5
14.244	12.0043	13.0181	15.3744	14.2856	12.4438	15.1628	15.2085	15.7813	16.1386	15.5518	11.438	14.9502	12.6862	13.5874	14.5204	11.4299	11.6162	13.0033	NA	0.843175	0.245528	1.10756		1.53375	H3BSM0;Q53FZ2	12	Acyl-coenzyme A synthetase ACSM3, mitochondrial (Fragment);Acyl-coenzyme A synthetase ACSM3, mitochondrial	ACSM3
14.2008	14.8288	14.8428	15.5794	13.6648	15.776	14.7191	14.7847	15.3718	14.5373	14.5834	13.0687	14.3942	15.2285	13.8007	15.132	14.1043	15.5877	13.482	NA	0.137747	0.804674	0.130356		0.353305	Q9NUB1;Q9NUB1-2	22	Acetyl-coenzyme A synthetase 2-like, mitochondrial;Isoform 2 of Acetyl-coenzyme A synthetase 2-like, mitochondrial	ACSS1
21.5724	16.903	22.8562	19.6214	19.8413	17.7424	16.9075	15.8372	17.8578	19.5088	15.3613	17.3385	17.6579	17.1719	17.4546	18.1066	18.4394	17.2533	20.5442	NA	0.150678	0.788154	0.355967		0.382485	A6NL76	8	Actin, alpha skeletal muscle	ACTA1
21.5726	21.5696	22.2125	22.2117	20.1194	22.6345	21.1421	21.1564	21.1151	21.8746	21.6527	21.8349	21.4681	20.4333	22.1996	22.9895	20.6889	21.1725	23.9424	NA	0.239427	0.680296	-0.250715		-0.5699	P62736	73	Actin, aortic smooth muscle	ACTA2
22.2718	23.0971	22.9362	23.6418	22.0132	22.4832	21.9413	22.6688	21.338	21.6558	22.4491	22.3257	22.8734	22.0773	22.4015	22.1163	22.917	22.7151	22.9961	NA	0.300057	0.615731	-0.183413		-0.687369	Q562R1	13	Beta-actin-like protein 2	ACTBL2
16.0148	18.0795	14.176	16.2266	14.4193	18.5109	16.7033	17.6811	12.3471	12.7628	17.262	16.6827	16.6446	17.143	16.7229	15.3054	16.5591	16.5663	16.6994	NA	0.346431	0.568323	-0.61458		-0.772598	K7EM38	5	Actin, cytoplasmic 2 (Fragment)	ACTG1
19.1706	19.5571	12.4359	17.9004	12.154	20.5313	18.6575	19.0464	15.4946	16.8618	18.0314	20.542	20.1582	19.3127	18.4352	17.7983	18.7524	20.2971	19.6452	NA	0.81573	0.257196	-1.66796		-1.49653	P63267	8	Actin, gamma-enteric smooth muscle	ACTG2
16.5289	16.2936	16.8616	15.8399	16.1727	17.0228	16.3057	16.5124	16.2705	16.8681	15.928	16.4546	16.4667	16.641	16.1082	15.9051	16.248	16.879	15.4285	NA	0.43725	0.487488	0.18207		0.930011	O96019	24	Actin-like protein 6A	ACTL6A
15.4457	15.3382	16.6796	16.3995	15.5415	16.1065	14.9609	14.8113	16.3532	16.686	15.2539	15.3794	15.0661	14.8597	14.96	14.421	15.3749	15.2295	14.8556	NA	2.00634	0.0370827	0.779635	+	2.90512	Q9NZ32	6	Actin-related protein 10	ACTR10
17.8699	18.5741	19.2086	18.726	17.9225	19.7563	18.6636	18.2973	19.0491	19.0503	17.9584	18.7356	18.5406	17.9959	17.5974	17.9973	17.7513	18.2275	18.2201	NA	1.68326	0.0619035	0.60379	+	2.54937	P61163	31	Alpha-centractin	ACTR1A
13.2019	13.7427	16.6814	13.4296	14.9522	14.9358	14.2061	14.2006	15.4483	15.6723	12.2828	13.0073	13.8525	14.3529	13.3408	11.7008	13.8855	13.7644	12.8	NA	0.967377	0.200383	0.92812		1.69766	P42025	8	Beta-centractin	ACTR1B
19.328	19.1797	19.8435	20.1972	18.8758	20.2214	18.5107	19.0036	19.2963	20.0344	19.157	18.6238	19.263	18.8195	18.4673	18.4816	18.8582	19.7211	18.6159	NA	1.04127	0.175282	0.466433		1.79209	P61160	51	Actin-related protein 2	ACTR2
19.0355	18.2404	19.2564	19.0733	18.8649	20.0338	18.0973	18.6513	18.8419	19.7109	18.6762	18.0813	18.8447	18.3672	18.0065	17.9133	18.7287	19.1777	18.2396	NA	0.859043	0.23943	0.412038		1.55509	P61158	46	Actin-related protein 3	ACTR3
13.9046	13.2223	14.4767	15.1513	13.024	15.994	13.5261	12.8494	12.6207	15.5551	11.494	13.2961	12.5951	13.1443	13.9105	13.6687	12.3603	13.3288	13.1611	NA	0.558655	0.397243	0.592539		1.12487	Q9H9F9	6	Actin-related protein 5	ACTR5
12.6499	13.1991	14.9859	15.5572	13.1472	13.4833	13.3211	12.8362	14.3522	14.7575	12.3146	12.4411	9.76512	12.8784	10.3704	13.8557	12.7741	13.7755	9.69626	NA	1.70181	0.0600825	1.71347	+	2.57011	F8VP72;F8VRL1;F8W043;F8W057;F8W0Q1;Q9GZN1;Q9GZN1-2	1	Actin-related protein 6;Actin-related protein 6 (Fragment);Actin-related protein 6;Actin-related protein 6;Actin-related protein 6;Actin-related protein 6;Isoform 2 of Actin-related protein 6	ACTR6
14.7685	15.1745	15.9143	15.7799	13.8571	11.6248	15.1694	14.8934	13.3612	16.6355	15.2491	14.5221	14.1519	14.1105	12.5354	13.2801	13.1556	13.5455	12.8937	NA	1.69423	0.0608525	1.36399	+	2.56164	E7EN07;G3V1W8;P37023	4	Receptor protein serine/threonine kinase;Serine/threonine-protein kinase receptor;Serine/threonine-protein kinase receptor R3	ACVRL1
15.7129	17.0991	16.2422	16.0105	16.6948	17.8766	15.9943	16.5092	16.7947	16.3883	15.628	13.881	14.5909	14.9458	15.6025	15.2305	16.4578	16.9921	16.0326	NA;TISSUE SPECIFICITY: Expression is highest in kidney, strong in brain and weaker in placenta and spleen. {ECO:0000269|PubMed:16465618}.	0.625213	0.353887	0.54278		1.2257	A0A1B0GU86;Q03154;Q03154-4	22	Aminoacylase-1;Aminoacylase-1;Isoform 4 of Aminoacylase-1	ACY1
13.662	13.7019	13.4819	13.6691	12.1275	17.397	14.0575	13.1934	12.6905	13.4456	12.6022	15.4075	14.8827	13.8845	13.6688	14.0317	14.2892	13.264	11.1294	NA	0.11673	0.830667	0.193447		0.304676	G3V2U7	4	Acylphosphatase	ACYP1
15.1995	14.2912	12.5143	12.2821	14.5799	15.8957	15.3519	15.7332	15.9439	14.7188	15.1727	15.9713	15.9805	15.3051	15.463	15.4543	14.2527	10.8432	14.9104	NA	0.113024	0.835762	0.20322		0.29594	E9PF46;F8WA34;P14621;U3KPX1	3	Acylphosphatase;Acylphosphatase;Acylphosphatase-2;Acylphosphatase (Fragment)	ACYP2
15.5407	14.1377	15.8448	17.5026	14.1764	14.6623	13.7154	14.417	15.1044	16.3316	13.8473	15.1534	14.7368	12.9138	13.379	13.3393	13.5654	14.2988	14.0089	TISSUE SPECIFICITY: Found in all tissues, occurs in large amounts in T-lymphocytes (PubMed:20959412). Expressed at the time of weaning in gastrointestinal tissues. {ECO:0000269|PubMed:20959412}.	1.87737	0.0456749	1.28725	+	2.76436	P00813	21	Adenosine deaminase	ADA
15.4658	14.1883	13.3257	14.4033	12.3897	14.7243	15.1395	14.4692	12.289	13.0606	14.3622	16.4373	15.1472	12.8781	13.0717	13.2018	13.7862	13.2574	12.0047	NA;TISSUE SPECIFICITY: Detected in blood plasma (at protein level). Widely expressed, with most abundant expression in human adult heart, lung, lymphoblasts, and placenta as well as fetal lung, liver, and kidney. In embryo, expressed in the outflow tract and atrium of the developing heart, the VII/VIII cranial nerve ganglion, and the notochord. {ECO:0000269|PubMed:15926889}.	0.862595	0.237965	0.852603		1.55985	A0A087X0I3;B4E3Q4;Q9NZK5	9	Adenosine deaminase 2	ADA2
15.5389	14.9532	17.8341	17.3786	15.1309	14.5472	15.0614	15.3473	15.9476	17.0197	15.5051	14.3751	14.9306	14.3833	13.4879	14.6115	13.9381	14.793	14.4277	TISSUE SPECIFICITY: Expressed in the brain (at protein level) (PubMed:23676497). Expressed in spleen, lymph node, thymus, peripheral blood leukocyte, bone marrow, cartilage, chondrocytes and fetal liver (PubMed:11511685, PubMed:9016778). {ECO:0000269|PubMed:11511685, ECO:0000269|PubMed:23676497, ECO:0000269|PubMed:9016778}.	2.09607	0.0323755	1.35247	+	3.00229	O14672	23	Disintegrin and metalloproteinase domain-containing protein 10	ADAM10
12.9407	12.392	10.2869	13.0617	12.5743	12.3682	12.8582	13.0929	13.222	10.4215	12.6092	12.7913	11.3967	12.9093	11.594	12.4673	12.113	12.9066	12.5633	TISSUE SPECIFICITY: Widely expressed. Expressed in chondrocytes. Isoform 2 is highly expressed in liver and heart. {ECO:0000269|PubMed:12054541, ECO:0000269|PubMed:7584026, ECO:0000269|PubMed:8647900, ECO:0000269|PubMed:9016778}.	0.0966647	0.857501	0.106304		0.256752	Q13443	6	Disintegrin and metalloproteinase domain-containing protein 9	ADAM9
11.8594	15.2253	12.5117	13.195	11.0641	15.7814	14.6287	11.5075	12.3433	12.8691	12.3508	14.2967	10.3124	12.0449	13.9207	10.6543	13.3954	12.7059	11.4535	TISSUE SPECIFICITY: Expressed highly in the small intestine and appendix, moderately in lymph node, mucosal lining of the colon, thymus, spleen and very weakly in the bone marrow. Predominantly expressed in dendritic cells (DC) of the germinal center. Weakly expressed in monocyte and highly expressed in macrophage. Absent in immature DC. {ECO:0000269|PubMed:14632642, ECO:0000269|PubMed:9271581}.	0.844078	0.245246	1.06651		1.53497	O15204;O15204-2	3	ADAM DEC1;Isoform 2 of ADAM DEC1	ADAMDEC1
15.4352	16.3604	13.4227	16.1855	14.8857	14.5464	15.4291	14.7455	14.7774	13.9279	14.2317	14.258	14.6897	15.1128	13.7072	14.2082	15.023	15.6818	9.73661	NA;TISSUE SPECIFICITY: Expressed at highest levels in brain and at lower levels in peripheral blood leukocytes. {ECO:0000269|PubMed:10448098}.	0.649327	0.340454	0.827703		1.26134	A0A087WTN6;H0Y7Q1;O75689;O75689-2;O75689-3	9	Arf-GAP with dual PH domain-containing protein 1;Arf-GAP with dual PH domain-containing protein 1 (Fragment);Arf-GAP with dual PH domain-containing protein 1;Isoform 2 of Arf-GAP with dual PH domain-containing protein 1;Isoform 3 of Arf-GAP with dual PH domain-containing protein 1	ADAP1
11.3478	13.0941	12.3894	13.8101	12.2089	11.6095	13.826	12.5752	13.3759	13.4255	13.2994	12.512	14.8341	13.2293	11.6517	13.6003	11.1853	10.673	13.0466	NA	0.139451	0.803082	0.186584		0.35718	F8W9Q8;G3V426;Q86TW2;Q86TW2-2	1	AarF domain-containing protein kinase 1;AarF domain-containing protein kinase 1 (Fragment);AarF domain-containing protein kinase 1;Isoform 2 of AarF domain-containing protein kinase 1	ADCK1
15.3281	15.0196	15.8752	16.5434	14.7423	16.2914	15.3724	15.1212	15.6274	16.788	15.3556	15.3198	15.3526	15.4003	14.9262	15.2886	15.1117	15.1293	15.815	NA;TISSUE SPECIFICITY: Expressed in all tissues. Found in much higher levels in reticulocytes than the beta subunit.	0.66051	0.334709	0.326261		1.27773	E7ENY0;E7EV99;P35611;P35611-2;P35611-3;P35611-6	43	Alpha-adducin;Alpha-adducin;Alpha-adducin;Isoform 2 of Alpha-adducin;Isoform 3 of Alpha-adducin;Isoform 6 of Alpha-adducin	ADD1
12.1674	16.8084	16.0427	13.3145	11.8678	12.2619	14.035	13.6345	12.399	17.0817	14.4594	11.2824	14.905	14.4655	14.0016	12.9041	12.7858	10.801	14.2252	TISSUE SPECIFICITY: Expressed mainly in brain, spleen, kidney cortex and medulla, and heart. Also expressed in human umbilical vein endothelial cells, human vascular smooth muscle cells, kidney tubular cells and K-562 cell line. {ECO:0000269|PubMed:12951058}.	0.157416	0.778999	0.338388		0.397481	P35612	8	Beta-adducin	ADD2
15.4684	14.619	16.1941	16.3195	14.5729	16.7256	15.2028	15.2537	15.9416	16.4137	15.6578	15.0918	14.7673	15.3163	14.8298	15.0161	14.7582	15.1769	15.4596	TISSUE SPECIFICITY: Isoform 1 is ubiquitously expressed. {ECO:0000269|PubMed:8893809}.	1.24631	0.123504	0.57544		2.04446	Q9UEY8	45	Gamma-adducin	ADD3
14.4856	16.6323	15.9117	16.1719	14.5553	14.9675	14.2273	14.2041	14.5803	17.8658	14.1518	14.2368	13.0704	14.2857	13.6519	13.0273	14.0953	14.2758	13.7053	TISSUE SPECIFICITY: Broadly expressed, found on most hematopoietic cells, including activated lymphocytes, monocytes, macrophages, dendritic cells, and granulocytes. Expressed also abundantly by smooth muscle cells. Expressed in thyroid, colorectal, gastric, esophageal and pancreatic carcinomas too. Expression are increased under inflammatory conditions in the CNS of multiple sclerosis and in syn…	2.06318	0.0340463	1.43561	+	2.96673	P48960	27	Adhesion G protein-coupled receptor E5	ADGRE5
17.2714	15.9189	16.4725	16.9018	15.5217	17.0749	19.418	15.52	18.4898	20.2201	19.5338	16.6475	22.1879	15.0712	17.6744	18.329	17.2869	17.6384	19.7413	NA	0.465171	0.465243	-0.859713		-0.976242	P00325	16	All-trans-retinol dehydrogenase [NAD(+)] ADH1B	ADH1B
17.3345	16.1284	15.493	15.7073	14.6622	18.7647	19.8044	16.1999	20.306	18.9927	20.1988	15.8774	21.9715	15.5128	18.9773	19.111	17.3186	17.1385	19.9325	NA	0.561523	0.395427	-1.11026		-1.12929	P00326	35	Alcohol dehydrogenase 1C	ADH1C
18.4622	17.8552	17.7326	18.1488	17.8381	18.7475	17.9151	18.5614	18.1793	17.7886	18.6257	17.4117	18.517	17.3768	18.5699	17.7048	18.0717	17.7941	18.6777	NA	0.00614607	0.988642	0.00381181		0.0178736	P11766	24	Alcohol dehydrogenase class-3	ADH5
13.2481	11.3954	13.6611	14.2808	11.1926	12.6419	14.2997	15.0495	14.1255	13.8213	14.1681	11.7284	11.0071	12.9706	15.5675	13.1387	11.8836	16.4029	12.3604	TISSUE SPECIFICITY: Stomach and liver.	0.0150387	0.975098	-0.0319349		-0.0433026	P28332;P28332-2	7	Alcohol dehydrogenase 6;Isoform 2 of Alcohol dehydrogenase 6	ADH6
15.7913	15.3385	15.7665	16.008	16.4772	16.6343	15.1672	14.6656	15.4749	14.5852	14.3973	14.697	15.7812	15.6374	14.8099	15.052	14.9452	16.1626	15.3476	TISSUE SPECIFICITY: Detected in heart, colon, lung, stomach, brain, spleen, liver, skeletal muscle and kidney. {ECO:0000269|PubMed:11602742, ECO:0000269|PubMed:14718544}.	0.0289659	0.954481	0.0260672		0.0821601	Q9BV57	11	1,2-dihydroxy-3-keto-5-methylthiopentene dioxygenase	ADI1
16.1241	15.0813	15.1068	16.0799	15.4548	16.7054	15.3459	14.6883	15.2305	15.2377	15.656	14.9764	16.4903	15.7414	14.8986	14.7118	15.6349	16.8266	16.1149	TISSUE SPECIFICITY: Expressed in adipose tissue (at protein level). Highly expressed in omental and subcutaneous adipose tissues. Expressed in heart, cornea, liver, kidney and spleen. {ECO:0000269|PubMed:23239344, ECO:0000269|Ref.4}.	0.458095	0.470733	-0.300155		-0.964613	Q15847	7	Adipogenesis regulatory factor	ADIRF
15.7616	16.7513	15.78	16.7995	16.2761	17.944	16.247	15.9737	15.9018	16.7983	15.7046	15.6677	17.0204	16.2878	15.8649	15.9021	15.4583	16.4409	16.313	TISSUE SPECIFICITY: Widely expressed. Highest level in placenta, liver, muscle and kidney.	0.157083	0.779442	0.116566		0.396743	P55263	20	Adenosine kinase	ADK
14.5191	14.7488	15.4363	14.7015	15.198	16.015	14.1303	14.3608	14.596	14.8625	13.7771	14.2052	13.4401	14.6585	14.2843	14.1649	13.8975	14.0494	13.0892	TISSUE SPECIFICITY: Widely expressed. Strong expression in heart, skeletal muscle, kidney and placenta. In brain, expression is stronger in the cerebellum and cortex regions. No expression detected in the colon. Strong increase of expression in colon and breast cancer tissues.	1.89101	0.04464	0.771995	+	2.77931	Q9H2P0	31	Activity-dependent neuroprotector homeobox protein	ADNP
13.311	11.802	13.7368	14.5678	13.4959	14.3843	12.0886	13.0485	14.9256	13.8394	13.4604	11.9842	12.571	12.0923	13.1955	12.3622	12.4273	10.0861	12.7024	NA	1.60507	0.0700792	1.1818	+	2.46145	Q96SZ5	8	2-aminoethanethiol dioxygenase	ADO
13.2325	12.5319	12.1447	14.7554	14.1064	13.9147	14.6264	12.9368	12.1346	14.8766	13.1835	14.9992	11.5435	12.3427	11.3049	10.7575	13.9388	10.7052	10.3509	NA	2.87453	0.0102385	2.05686	+	3.83195	C9JZW7;P54922	2	[Protein ADP-ribosylarginine] hydrolase (Fragment);[Protein ADP-ribosylarginine] hydrolase	ADPRH
15.2655	15.1028	15.8659	17.3187	14.4897	11.7425	13.99	15.5342	14.0817	15.4484	15.5537	13.6606	13.998	13.1958	14.0099	13.6716	14.3632	12.9081	13.72	TISSUE SPECIFICITY: Ubiquitous. {ECO:0000269|PubMed:16278211}.	1.27435	0.117626	1.14256		2.07805	Q9NX46	11	ADP-ribose glycohydrolase ARH3	ADPRS
14.2797	13.8593	13.0283	14.7427	14.0548	17.1118	13.6157	12.7582	13.7603	12.9748	12.5893	13.9982	13.6504	14.3048	13.395	13.5511	14.0347	14.2346	13.2624	NA	0.0963367	0.857708	0.121644		0.255955	Q16186	13	Proteasomal ubiquitin receptor ADRM1	ADRM1
15.4601	16.051	16.3858	17.3317	15.803	16.6208	14.9733	15.4842	15.7828	18.2278	15.1172	15.2744	15.6937	15.7859	15.0819	15.2859	14.8527	15.1986	14.6474	NA;TISSUE SPECIFICITY: Ubiquitously expressed. Both isoforms are produced by all tissues. Isoform 2 is 10-fold less abundant than isoform 1.	1.31022	0.110975	0.821817	+	2.12072	A0A1B0GTJ7;A0A1B0GWJ0;P30566	22	Adenylosuccinate lyase	ADSL
16.5873	17.1967	16.3234	17.5284	16.9391	18.3685	16.0549	16.3104	17.4693	16.515	15.6962	16.4536	16.4613	16.3551	16.0744	15.9327	16.7314	17.059	15.9682	NA	0.714099	0.305225	0.418051		1.35499	P30520	25	Adenylosuccinate synthetase isozyme 2	ADSS2
15.62	15.367	17.0988	17.8488	16.1495	17.7695	15.867	15.0455	15.8597	16.2672	15.4481	15.4549	15.6957	14.1423	14.378	14.181	15.8923	17.0171	15.2253	TISSUE SPECIFICITY: Expressed in osteoblast and visceral fat. {ECO:0000269|PubMed:8920928}.	1.19676	0.133789	0.930862		1.98462	Q8IUX7	23	Adipocyte enhancer-binding protein 1	AEBP1
12.475	12.8117	14.8061	14.0254	15.2328	16.1549	13.4464	14.586	10.6661	14.278	14.6577	14.5627	11.648	11.0155	13.2008	12.552	14.4573	10.0204	14.2563	TISSUE SPECIFICITY: Low expression in normal breast epithelial cell line MCF-10A and in tumorigenic breast cancer cell lines MCF-7, T-47D and ZR-75-1. Highly expressed in the invasive breast cancer cell lines MDA-MB-231 and MDA-MB-435. Overexpressed in prostate carcinoma. {ECO:0000269|PubMed:17520695, ECO:0000269|PubMed:17885682}.	1.2936	0.113985	1.52516		2.10099	Q8N556;Q8N556-2	4	Actin filament-associated protein 1;Isoform 2 of Actin filament-associated protein 1	AFAP1
14.0615	12.9278	14.28	16.9304	14.123	16.6532	13.8083	14.3129	12.9062	14.0851	12.4616	15.0123	15.3892	12.7112	12.1511	11.1705	10.3774	12.6025	13.268	TISSUE SPECIFICITY: Detected in spleen and thyroid, and at lower levels in kidney, brain, lung and pancreas. {ECO:0000269|PubMed:17412687}.	1.69609	0.0606728	1.77259	+	2.56372	Q8N4X5	17	Actin filament-associated protein 1-like 2	AFAP1L2
14.3886	13.8748	12.442	13.5399	13.6006	14.5618	14.6653	14.0955	12.8941	15.7654	14.8059	13.0706	10.0759	12.1134	14.3305	13.7859	12.1232	15.6035	12.9856	NA	0.870295	0.234872	0.972811		1.57015	H0Y5F4;Q8WV93	2	AFG1-like ATPase (Fragment);AFG1-like ATPase	AFG1L
17.0901	15.6168	17.9825	18.0803	17.5869	17.8865	17.3412	17.5362	18.1449	17.8312	17.7659	16.5283	15.9749	16.7135	16.5461	16.5669	14.6878	16.1507	15.9707	TISSUE SPECIFICITY: Ubiquitous. Highly expressed in the cerebellar Purkinje cells. {ECO:0000269|PubMed:20208537}.	3.01471	0.00843972	1.36202	+	3.98075	Q9Y4W6	49	AFG3-like protein 2	AFG3L2
14.9622	13.5758	15.0237	15.4082	12.4563	13.5843	12.5947	15.315	13.6605	15.7731	13.9361	11.4921	16.1456	14.6081	14.953	14.7556	14.6927	15.7642	15.7741	TISSUE SPECIFICITY: High level detected in plasma but also in extravascular fluids such as follicular and cerebrospinal fluids (at protein level). {ECO:0000269|PubMed:12463752, ECO:0000269|PubMed:15952736, ECO:0000269|PubMed:7517938}.	1.47327	0.0857626	-1.26007	+	-2.31114	P43652	6	Afamin	AFM
13.9665	14.7548	16.1324	13.1721	14.9546	16.4438	14.5388	13.9223	12.2205	17.1688	14.0126	14.3788	13.8894	14.1281	13.6425	13.7651	14.1231	13.9321	14.6401	NA	0.573022	0.387453	0.621623		1.14695	Q6ULP2;Q6ULP2-6;Q6ULP2-8;Q6ULP2-9	14	Aftiphilin;Isoform 2 of Aftiphilin;Isoform 4 of Aftiphilin;Isoform 5 of Aftiphilin	AFTPH
14.6316	14.1754	15.2137	16.167	14.8851	16.2797	14.5015	14.698	13.9996	14.2888	14.5727	13.8129	11.9607	14.2533	14.117	13.8823	14.6125	14.8617	13.8868	TISSUE SPECIFICITY: Ubiquitously expressed. {ECO:0000269|PubMed:7634337}.	1.27104	0.118318	0.829663		2.07409	P52594;P52594-2;P52594-3;P52594-4	9	Arf-GAP domain and FG repeat-containing protein 1;Isoform 2 of Arf-GAP domain and FG repeat-containing protein 1;Isoform 3 of Arf-GAP domain and FG repeat-containing protein 1;Isoform 4 of Arf-GAP domain and FG repeat-containing protein 1	AGFG1
12.8639	13.8995	12.1225	16.113	14.534	16.669	16.4417	14.7969	15.7044	13.1637	14.0404	14.86	14.4141	14.3432	14.6963	15.2831	13.5208	14.0132	15.3211	NA	0.0540146	0.917354	0.0876004		0.14933	O95081	4	Arf-GAP domain and FG repeat-containing protein 2	AGFG2
15.6011	14.565	16.8666	17.7705	15.4036	16.2817	15.3371	15.2019	15.8144	16.6789	15.0854	16.0592	14.8738	15.2896	13.6922	15.4107	13.4229	14.6382	15.1848	TISSUE SPECIFICITY: Highly expressed in muscle, heart, kidney and brain. {ECO:0000269|PubMed:15939762}.	2.13554	0.0302908	1.24419	+	3.04486	Q53H12	18	Acylglycerol kinase, mitochondrial	AGK
15.7824	16.6011	16.4837	17.4632	15.5376	16.7173	15.9243	16.3277	16.8692	17.1383	16.3302	15.4849	16.4226	15.5113	15.5352	15.5035	15.8756	16.0139	16.4078	TISSUE SPECIFICITY: Liver, kidney and lymphoblastoid cells express predominantly isoform 1;whereas muscle and heart express not only isoform 1, but also muscle-specific isoform mRNAs (isoforms 2, 3 and 4). Isoforms 5 and 6 are present in both liver and muscle.	1.1018	0.157106	0.492602		1.86796	P35573	51	Glycogen debranching enzyme	AGL
16.7399	16.7533	13.1223	16.0111	16.7052	16.5323	15.4004	16.0641	16.0178	15.6915	15.7306	13.7006	10.0926	15.925	16.528	16.4573	15.6979	15.7245	14.596	TISSUE SPECIFICITY: Highly expressed in liver and kidney. Also found in skeletal muscle, fetal liver, brain, testis, skin and the gastrointestinal tract. Within brain, expression is higher in the cerebral cortex with lower levels in the medulla and spinal cord. {ECO:0000269|PubMed:11804860, ECO:0000269|PubMed:11914032}.	0.421116	0.500506	0.702714		0.902863	Q9BSE5	9	Agmatinase, mitochondrial	AGMAT
16.5402	16.1465	17.9235	18.0638	14.9269	17.63	15.9583	16.3398	16.145	17.4787	16.3302	11.4857	14.5668	16.0834	15.352	15.7262	16.0621	15.435	16.7225	NA	0.345447	0.569155	0.540538		0.770827	Q5TA58;Q9UL18	6	Protein argonaute-1	AGO1
13.7561	13.8675	15.2441	17.5111	14.9046	15.1476	13.4157	13.3699	12.4163	14.149	13.3647	13.8717	13.3238	13.6903	13.4221	13.7041	13.9747	13.9122	13.9326	NA	0.522487	0.421039	0.542964		1.06842	Q9UKV8	16	Protein argonaute-2	AGO2
14.5881	15.3372	15.872	16.7558	15.1052	16.8927	14.6344	14.6409	14.9703	15.973	14.9236	14.6628	14.0966	14.2708	14.1576	14.5846	14.9402	14.3489	14.9667	NA	1.78675	0.0525372	0.882244	+	2.66451	Q9H9G7	18	Protein argonaute-3	AGO3
14.5208	14.4942	16.6359	13.3793	14.3094	13.2393	14.2409	13.618	15.1485	16.1007	13.566	14.4064	14.6782	14.649	14.41	14.1104	14.0872	14.7969	14.1591	TISSUE SPECIFICITY: Widely expressed. Expressed in adipose tissue and at high levels in testis and pancreas. Expressed at lower levels in tissues such as heart, brain, placenta, kidney, lung, spleen, thymus, prostate, ovary, intestine, colon, leukocyte and liver. {ECO:0000269|PubMed:21873652}.	0.0515103	0.921255	0.0586373		0.142762	Q99943	6	1-acyl-sn-glycerol-3-phosphate acyltransferase alpha	AGPAT1
15.9499	13.87	15.5736	16.5669	15.8885	14.6117	13.5238	13.9737	16.0252	17.5925	14.9321	13.7429	14.1612	13.5503	13.0718	13.6543	12.6019	12.1544	13.5709	TISSUE SPECIFICITY: Expressed predominantly in adipose tissue, pancreas and liver. {ECO:0000269|PubMed:21873652, ECO:0000269|PubMed:9242711}.	2.72124	0.0126253	1.93544	+	3.66938	O15120	4	1-acyl-sn-glycerol-3-phosphate acyltransferase beta	AGPAT2
14.9567	14.6175	15.4151	15.4858	15.3155	14.0582	14.667	15.1646	15.6451	15.6235	14.9937	15.2146	14.2944	14.6604	13.9102	14.2066	13.547	13.9567	14.7829	TISSUE SPECIFICITY: Widely expressed with highest levels in testis, pancreas and kidney, followed by spleen, lung, adipose tissue and liver. {ECO:0000269|PubMed:21173190}.	3.17554	0.00665828	0.902418	+	4.15187	Q9NRZ7	8	1-acyl-sn-glycerol-3-phosphate acyltransferase gamma	AGPAT3
15.6558	15.7511	14.9561	14.9428	15.1945	17.0359	15.3353	14.9881	12.6534	14.4233	14.2978	14.708	14.3366	15.4152	13.3122	13.5816	10.8941	15.8963	14.2185	TISSUE SPECIFICITY: Widely expressed. {ECO:0000269|PubMed:16620771, ECO:0000269|PubMed:21173190}.	0.983937	0.194341	1.04453		1.71901	Q9NUQ2	11	1-acyl-sn-glycerol-3-phosphate acyltransferase epsilon	AGPAT5
16.6938	15.9064	17.2489	17.5897	16.6129	16.8431	15.7024	15.676	16.1667	17.5886	15.6602	16.2867	15.8033	15.9187	15.9259	15.6742	14.6808	16.0698	15.734	NA	1.79557	0.0516789	0.811256	+	2.67427	O00116	17	Alkyldihydroxyacetonephosphate synthase, peroxisomal	AGPS
21.091	25.3452	21.9568	21.2975	21.9719	24.9214	23.8149	23.525	23.7531	23.9964	23.8433	20.5878	22.3115	22.4549	22.6951	21.984	25.1112	22.3594	20.9847	TISSUE SPECIFICITY: Expressed strongly in trachea, lung, stomach, colon, prostate and small intestine. Expressed weakly in pituitary gland, salivary gland, mammary gland, bladder, appendix, ovary, fetal lung, uterus, pancreas, kidney, fetal kidney, testis, placenta, thyroid gland and in estrogen receptor (ER)-positive breast cancer cell lines. {ECO:0000269|PubMed:9790916}.	0.279837	0.637225	0.451425		0.649009	O95994	72	Anterior gradient protein 2 homolog	AGR2
17.9663	19.925	18.1595	16.3318	17.6063	20.6918	20.0247	19.2904	20.4958	20.4438	20.0263	16.488	20.0179	16.6822	18.8261	17.9823	19.8652	17.7184	18.0601	TISSUE SPECIFICITY: Expressed in the lung, in the ciliated cells of the airway epithelium (PubMed:25751668). Expression increased with differentiation of airway epithelial cells (PubMed:25751668). Not detected in the mucous cells (PubMed:25751668). Expressed in ciliated cells in the oviduct (PubMed:26170690). Also detected in stomach, colon, prostate and liver (PubMed:25751668). Expressed in brea…	0.322005	0.592282	0.50383		0.728161	Q8TD06	29	Anterior gradient protein 3	AGR3
16.4153	15.6684	18.3972	18.8741	16.4577	16.3851	16.4886	15.9727	16.4744	17.6688	16.6342	16.149	15.9108	15.3588	15.5612	15.9534	15.9847	16.3008	16.1696	TISSUE SPECIFICITY: Expressed in basement membranes of lung and kidney. Muscle- and neuron-specific isoforms are found. Isoforms (y+) with the 4 AA insert and (z+8) isoforms with the 8 AA insert are all neuron-specific. Isoforms (z+11) are found in both neuronal and non-neuronal tissues. {ECO:0000269|PubMed:16487930, ECO:0000269|PubMed:20551380, ECO:0000269|PubMed:9652404}.	1.4973	0.0829166	0.907445	+	2.33877	O00468-6;O00468-7	24	Isoform 6 of Agrin;Isoform 7 of Agrin	AGRN
15.0241	15.6641	16.8802	17.7622	14.5963	12.1971	15.0764	14.8897	13.5256	18.0701	16.3277	15.9237	17.4304	15.7452	15.6282	16.095	16.1513	16.8104	18.0307	TISSUE SPECIFICITY: Expressed by the liver and secreted in plasma.	0.84562	0.244751	-1.06111		-1.53705	P01019	8	Angiotensinogen	AGT
12.5367	12.1084	15.9615	16.2515	12.053	14.9289	12.6054	14.3983	15.6055	16.242	14.8997	13.7008	13.9901	14.6142	13.997	14.6002	13.8977	15.2554	14.6531	NA	0.0914678	0.865077	-0.155366		-0.244083	J3KNS1;Q9UPW5	3	Cytosolic carboxypeptidase 1	AGTPBP1
15.2586	13.4811	15.478	14.9942	14.6535	16.1163	13.847	14.5411	14.0178	15.3647	13.6618	14.363	13.6326	13.4788	13.6309	12.6541	13.4246	13.7542	12.6978	NA	2.95737	0.00917333	1.32338	+	3.91986	Q8WYP5;Q8WYP5-2;Q8WYP5-3	22	Protein ELYS;Isoform 2 of Protein ELYS;Isoform 3 of Protein ELYS	AHCTF1
18.7637	18.7088	19.2209	18.9521	18.873	19.6502	17.9019	17.9549	17.9537	19.3205	18.0364	17.2956	18.3232	19.6311	18.1155	19.0808	19.1887	18.6388	18.3825	NA	0.296633	0.619595	-0.213181		-0.680926	P23526	50	Adenosylhomocysteinase	AHCY
14.2487	16.1846	16.3591	14.5194	13.5945	17.0215	14.3133	14.2425	15.3158	15.7913	14.6122	14.736	14.4856	14.5136	14.9644	14.7412	15.3907	14.8175	14.5945	TISSUE SPECIFICITY: Expressed in dendritic cells. {ECO:0000269|PubMed:11904675}.	0.312739	0.602358	0.29145		0.711044	O43865	15	S-adenosylhomocysteine hydrolase-like protein 1	AHCYL1
13.6912	11.24	14.4704	14.3085	13.1886	15.6004	13.7884	14.1683	11.9774	13.7673	13.2348	11.2914	10.041	12.8481	10.8884	11.9142	12.0976	10.5876	10.9693	NA	2.64383	0.0145309	2.05871	+	3.58727	Q5TGY3	2	AT-hook DNA-binding motif-containing protein 1	AHDC1
18.9181	19.4707	19.9378	20.7644	19.2136	20.4403	19.5063	18.7016	20.2915	20.8084	19.1674	19.7983	18.6093	17.6643	18.8775	18.8399	18.4276	18.9251	20.0735	NA	1.98986	0.0378628	0.97763	+	2.8872	Q09666	641	Neuroblast differentiation-associated protein AHNAK	AHNAK
14.8547	16.2031	16.0565	16.4189	16.0805	18.7306	15.1535	14.1413	15.8908	15.5242	15.1848	14.7956	15.4816	13.2103	14.5783	14.8514	13.0743	15.3568	15.5828	NA	1.35754	0.103049	1.16207	+	2.17656	Q8IVF2-3	55	Isoform 3 of Protein AHNAK2	AHNAK2
13.4997	14.1392	15.0413	12.9415	13.0826	14.1046	12.7555	13.4763	12.57	13.2328	13.4777	13.2754	12.8301	12.013	13.3028	12.3124	12.4104	12.2232	11.2845	NA;TISSUE SPECIFICITY: Expressed in all tissues tested including blood, brain, heart, kidney, liver, lung, pancreas and skeletal muscle. Expressed in retinal photoreceptors (PubMed:29726989). {ECO:0000269|PubMed:29726989, ECO:0000269|PubMed:7515333, ECO:0000269|PubMed:8246913}.	2.609	0.0150359	1.12688	+	3.55032	A0A1B0GVI7;A0A2R8Y7G1;P35869	4	Uncharacterized protein (Fragment);Aryl hydrocarbon receptor;Aryl hydrocarbon receptor	AHR
16.3697	15.3667	16.2369	15.9101	15.7646	17.0993	15.293	15.7168	15.2113	16.1621	15.0902	14.9202	15.5196	15.7295	15.6156	15.7147	15.8742	15.6827	15.1768	TISSUE SPECIFICITY: Expressed in numerous tissues, including brain, heart, skeletal muscle and kidney and, at lower levels, liver and placenta. {ECO:0000269|PubMed:11554768}.	0.245523	0.673337	0.145596		0.582056	O95433	31	Activator of 90 kDa heat shock protein ATPase homolog 1	AHSA1
15.7948	16.2997	15.5433	13.3748	14.1545	18.1613	15.3588	17.1057	14.5934	16.6401	15.3989	14.396	19.4696	17.1429	17.5177	16.5872	17.1416	19.8761	18.3007	TISSUE SPECIFICITY: Synthesized in liver and selectively concentrated in bone matrix. Secreted in plasma. It is also found in dentin in much higher quantities than other plasma proteins.	2.92859	0.00961951	-2.43667	+	-3.88931	P02765	10	Alpha-2-HS-glycoprotein	AHSG
13.0134	16.6454	14.6515	13.7056	13.5302	13.3186	14.4842	14.1496	14.814	14.1216	11.9935	12.9864	16.3199	15.1921	14.4889	13.1156	13.9561	11.3686	15.6619	TISSUE SPECIFICITY: Expressed in blood and bone marrow. {ECO:0000269|PubMed:11231637, ECO:0000269|PubMed:12066189}.	0.222275	0.699234	-0.349293		-0.535247	Q9NZD4	4	Alpha-hemoglobin-stabilizing protein	AHSP
14.9111	15.7228	18.2417	13.3942	15.3494	17.6264	16.0305	15.3366	16.5425	12.8799	14.7956	15.8586	15.5314	15.1852	15.7676	16.4171	15.8117	15.9312	14.6	TISSUE SPECIFICITY: Widely expressed in adult tissues, with highest expression in the heart and skeletal muscle. {ECO:0000269|PubMed:17681137}.	0.0283427	0.955159	-0.0488938		-0.0804454	Q96BJ3	12	Axin interactor, dorsalization-associated protein	AIDA
16.1627	17.7335	17.1377	18.8166	16.9823	17.8929	17.3763	17.1989	17.4237	17.4929	17.0777	16.9269	16.2492	16.7473	16.2798	16.5518	15.2427	15.7528	16.8743	TISSUE SPECIFICITY: [Isoform 3]: Brain specific. {ECO:0000269|PubMed:20111043}.;TISSUE SPECIFICITY: [Isoform 4]: Expressed in all tested tissues except brain. {ECO:0000269|PubMed:16644725}.;TISSUE SPECIFICITY: [Isoform 5]: Isoform 5 is frequently down-regulated in human cancers. {ECO:0000269|PubMed:16365034}.;TISSUE SPECIFICITY: Expressed in all tested tissues (PubMed:16644725). Detected in muscl…	2.82463	0.0110592	1.10928	+	3.77902	O95831;O95831-3	44	Apoptosis-inducing factor 1, mitochondrial;Isoform 3 of Apoptosis-inducing factor 1, mitochondrial	AIFM1
14.888	15.7455	15.4523	15.8798	14.9309	17.5829	15.1637	15.3355	15.1656	14.5499	14.6478	14.8845	14.9754	15.1633	14.9226	15.0569	15.247	15.4548	14.7561	NA	0.390891	0.526279	0.269892		0.851096	Q12904	28	Aminoacyl tRNA synthase complex-interacting multifunctional protein 1	AIMP1
15.176	16.3582	16.7228	17.3196	16.2359	16.1889	15.6822	15.3937	16.6838	16.5687	14.7609	15.6761	15.5298	16.2003	15.6297	15.7872	16.3755	16.487	15.3994	NA	0.196156	0.729017	0.148352		0.481118	Q13155	11	Aminoacyl tRNA synthase complex-interacting multifunctional protein 2	AIMP2
15.8591	15.9645	16.3756	16.4423	15.4315	17.5765	15.4872	15.5321	15.761	14.8186	15.5347	16.0184	16.247	16.0703	15.8508	15.7214	15.8168	15.6426	15.3242	TISSUE SPECIFICITY: Widely expressed. Higher levels seen in the heart, placenta and skeletal muscle. Not expressed in the liver.	0.125372	0.818751	0.0897027		0.324857	O00170	19	AH receptor-interacting protein	AIP
17.7561	17.3184	19.3235	19.0734	17.8791	19.9181	16.639	17.8311	17.3617	19.4745	17.7615	17.2126	19.6274	17.4614	17.5545	17.3839	17.9807	18.3435	18.1024	NA	0.0507326	0.922214	0.0642669		0.140715	P00568;Q5T9B7	27	Adenylate kinase isoenzyme 1	AK1
19.0896	19.5834	18.926	20.8486	18.6735	20.3766	19.3023	19.7494	19.9482	20.3146	19.3946	18.4324	19.4241	19.3343	19.0624	18.8583	18.9859	18.89	18.3382	NA;TISSUE SPECIFICITY: Present in most tissues. Present at high level in heart, liver and kidney, and at low level in brain, skeletal muscle and skin. Present in thrombocytes but not in erythrocytes, which lack mitochondria. Present in all nucleated cell populations from blood, while AK1 is mostly absent. In spleen and lymph nodes, mononuclear cells lack AK1, whereas AK2 is readily detectable. Th…	1.14005	0.14712	0.56851		1.91528	F8W1A4;P54819;P54819-2	49	Adenylate kinase 2, mitochondrial;Adenylate kinase 2, mitochondrial;Isoform 2 of Adenylate kinase 2, mitochondrial	AK2
17.5515	16.7097	18.7672	19.9065	16.8603	18.8798	17.7689	18.3383	17.8505	18.4204	18.1546	17.158	16.967	17.532	16.6397	17.0578	17.8722	17.487	16.4264	TISSUE SPECIFICITY: Highly expressed in heart, skeletal muscle and liver, moderately expressed in pancreas and kidney, and weakly expressed in placenta, brain and lung. {ECO:0000269|PubMed:11485571}.	1.50015	0.0827035	0.890169	+	2.34203	Q9UIJ7	33	GTP:AMP phosphotransferase AK3, mitochondrial	AK3
17.1802	18.1724	15.7118	17.6672	15.9098	16.2295	16.2179	14.8416	16.9647	17.1644	16.4494	15.432	16.0148	17.5209	15.0436	16.9378	14.3132	16.7547	15.9592	TISSUE SPECIFICITY: Highly expressed in kidney, moderately expressed in heart and liver and weakly expressed in brain. {ECO:0000269|PubMed:11485571}.	0.394944	0.52246	0.417329		0.858109	P27144	16	Adenylate kinase 4, mitochondrial	AK4
16.2681	15.6616	17.0584	16.9164	16.6214	14.4458	14.9033	15.6323	12.101	16.9787	15.7723	14.6772	13.6825	15.0598	14.7106	14.5075	14.5048	14.4651	14.9707	TISSUE SPECIFICITY: Isoform 1 is detected in thymus, prostate, testis, ovary, colon and small intestine (PubMed:8769136). Isoform 2 is highly expressed in testis and detected at much lower levels in kidney, pancreas, liver, lung and brain (PubMed:7499250). {ECO:0000269|PubMed:7499250, ECO:0000269|PubMed:8769136}.	1.08218	0.162113	1.02909		1.8435	Q92667	21	A-kinase anchor protein 1, mitochondrial	AKAP1
15.9643	15.3547	16.7171	17.3863	14.7165	17.385	16.4389	14.1734	16.4545	16.4667	16.72	15.598	15.843	13.7455	15.7305	15.9539	14.9825	15.7788	16.899	TISSUE SPECIFICITY: Expressed in endothelial cells, cultured fibroblasts and osteosarcoma, but not in platelets, leukocytes, monocytic cell lines or peripherical blood cells.	0.591577	0.375514	0.552743		1.17521	Q02952;Q02952-2;Q02952-3	81	A-kinase anchor protein 12;Isoform 2 of A-kinase anchor protein 12;Isoform 3 of A-kinase anchor protein 12	AKAP12
15.0412	14.7828	16.2027	15.4001	15.0526	16.7805	14.4349	14.7171	15.2426	15.2996	14.6046	14.5698	14.3535	14.4706	14.077	14.2422	14.4536	14.378	13.3578	TISSUE SPECIFICITY: Detected in mammary gland (PubMed:9627117). Detected in heart (at protein level) (PubMed:11546812). Expressed as a 5.3 kb transcript in hematopoietic cells, skeletal muscle, lung, heart, estrogen-responsive reproductive tissues, including breast ductal epithelium. Also found in testis and breast cancer cell lines. Predominantly expressed as a 10 kb transcript in the heart and …	2.48647	0.0180915	0.986963	+	3.42014	Q12802;Q12802-2;Q12802-4	37	A-kinase anchor protein 13;Isoform 2 of A-kinase anchor protein 13;Isoform 3 of A-kinase anchor protein 13	AKAP13
15.287	11.5331	15.2284	15.0974	15.1264	11.7367	15.3007	14.3023	12.0793	14.5514	11.7081	14.0451	13.7837	14.1899	13.3128	13.4493	14.1921	14.0065	10.8487	TISSUE SPECIFICITY: Widely expressed. Found in heart, brain, lung, liver, skeletal muscle, kidney and pancreas. Expressed in activated B-cells and placenta. Expressed in all cell lines tested including Jurkat-TAg, U-937 and HEK293 cells. {ECO:0000269|PubMed:19840947}.	0.270296	0.646818	0.435418		0.630635	Q02040	9	A-kinase anchor protein 17A	AKAP17A
14.9183	14.4953	16.3071	16.4582	15.5896	17.0938	15.0669	13.99	14.7466	16.4803	14.6779	15.594	14.8041	14.4451	14.2454	14.6483	14.2092	15.1188	14.7986	NA	1.39706	0.0970109	0.841558	+	2.22282	Q9Y2D5-6	34	Isoform 4 of A-kinase anchor protein 2	AKAP2
13.8601	10.9077	12.8625	14.7762	11.9584	12.9319	14.1147	12.7582	14.3171	12.8334	14.157	13.9122	11.8722	16.7187	14.5105	10.1634	14.9088	10.9057	9.77638	TISSUE SPECIFICITY: Predominantly in the cerebral cortex and the postsynaptic densities of the forebrain, and to a lesser extent in adrenal medulla, lung and anterior pituitary.	0.294541	0.62142	0.588786		0.67698	P24588	5	A-kinase anchor protein 5	AKAP5
14.7072	14.7725	15.0975	15.69	14.6062	15.8787	14.2796	14.0342	14.1524	15.6748	13.5089	13.1665	14.032	14.1131	13.9402	13.8115	14.5043	14.3708	11.6055	TISSUE SPECIFICITY: Highly expressed in heart, liver, skeletal muscle, kidney and pancreas. Expressed in mature dendritic cells. {ECO:0000269|PubMed:19277197}.	1.21248	0.130261	0.862515		2.00367	O43823	16	A-kinase anchor protein 8	AKAP8
14.5572	15.5558	16.6128	16.9817	15.0371	16.2082	15.1576	14.4031	11.685	16.7357	13.7345	13.0216	13.2742	14.8414	13.7827	13.9878	13.4818	14.8404	13.9643	TISSUE SPECIFICITY: Ubiquitously expressed. Expressed in the brain cortex (at protein level). {ECO:0000269|PubMed:10697960, ECO:0000269|PubMed:16391387}.	0.808865	0.260312	0.949526		1.48715	Q9ULX6	14	A-kinase anchor protein 8-like	AKAP8L
17.5341	17.6478	18.416	18.4861	16.9042	18.8111	17.5901	16.9498	18.5637	18.8033	17.3538	16.9198	17.1192	16.7815	16.6551	17.4097	17.4474	17.7089	17.0616	NA;TISSUE SPECIFICITY: Widely expressed (PubMed:10202149). Isoform 4: Highly expressed in skeletal muscle and in pancreas (PubMed:9482789). {ECO:0000269|PubMed:10202149, ECO:0000269|PubMed:9482789}.	1.3605	0.102618	0.662584	+	2.18004	A0A0A0MRF6;Q99996;Q99996-1;Q99996-3;Q99996-5;Q99996-6	109	A-kinase anchor protein 9;A-kinase anchor protein 9;Isoform 1 of A-kinase anchor protein 9;Isoform 3 of A-kinase anchor protein 9;Isoform 5 of A-kinase anchor protein 9;Isoform 6 of A-kinase anchor protein 9	AKAP9
16.9736	17.6442	16.2541	16.77	16.8093	19.107	17.8967	17.687	17.9999	19.2383	17.3007	17.3996	17.974	17.548	17.3874	17.2414	17.7792	17.7453	17.1091	TISSUE SPECIFICITY: Widely expressed. Highly expressed in kidney, salivary gland and liver. Detected in trachea, stomach, brain, lung, prostate, placenta, mammary gland, small intestine and lung. {ECO:0000269|PubMed:10486210, ECO:0000269|PubMed:10510318, ECO:0000269|PubMed:11306097}.	0.0502278	0.922417	0.0494111		0.139385	P14550	24	Aldo-keto reductase family 1 member A1	AKR1A1
16.7629	17.5275	18.1965	19.3342	16.7995	19.7542	18.5707	17.3197	18.3272	17.6921	17.721	18.0665	18.9503	16.9857	18.3975	17.9233	16.8965	17.7308	17.7841	TISSUE SPECIFICITY: Highly expressed in embryonic epithelial cells (EUE) in response to osmotic stress. {ECO:0000269|PubMed:8435445}.	0.197679	0.727247	0.196266		0.484321	P15121	28	Aldo-keto reductase family 1 member B1	AKR1B1
15.6943	16.188	15.2898	17.1811	15.7814	19.4464	16.0061	16.7818	16.6399	18.2393	16.1205	14.6018	14.9719	14.9601	15.9445	15.8205	15.6501	15.6865	15.5332	TISSUE SPECIFICITY: Found in many tissues. Highly expressed in small intestine, colon and adrenal gland. {ECO:0000269|PubMed:9565553}.	1.14324	0.146484	0.987968		1.9192	O60218	30	Aldo-keto reductase family 1 member B10	AKR1B10
11.4962	14.0691	12.15	13.6193	14.4313	15.0849	14.228	15.0808	14.6286	12.0555	13.7996	10.8337	14.7465	11.8053	13.1576	14.2215	13.0431	12.0451	15.3652	NA;TISSUE SPECIFICITY: Expressed in fetal testes. Expressed in fetal and adult adrenal glands. {ECO:0000269|PubMed:21802064}.	0.0139493	0.97642	-0.0270423		-0.0402143	B4DK69;P52895	7	Aldo-keto reductase family 1 member C2	AKR1C2
16.6518	17.3969	16.1383	17.4667	17.0947	19.6914	17.6404	17.6981	17.5572	17.1984	17.7196	14.631	17.5801	18.1329	17.2208	16.7635	17.8837	17.4636	16.9812	NA;TISSUE SPECIFICITY: Expressed in many tissues including adrenal gland, brain, kidney, liver, lung, mammary gland, placenta, small intestine, colon, spleen, prostate and testis. High expression in prostate and mammary gland. In the prostate, higher levels in epithelial cells than in stromal cells. In the brain, expressed in medulla, spinal cord, frontotemporal lobes, thalamus, subthalamic nucle…	0.162372	0.773386	-0.191879		-0.408421	A0A0A0MSS8;P42330	40	Aldo-keto reductase family 1 member C3	AKR1C3
15.5605	17.146	15.5705	13.9321	16.2077	19.7376	17.3646	17.0522	16.7262	15.5885	17.3252	15.0822	17.3631	16.6415	16.8416	16.6538	17.1883	16.6189	16.6153	TISSUE SPECIFICITY: Detected in brain, liver, small intestine and testis, and at lower levels in heart, prostate, skeletal muscle and spleen. Detected in kidney proximal and distal tubules, endothelial cells lining the Bowman's capsules and some cysts. Detected at low levels in lung and pancreas (at protein level). Widely expressed. {ECO:0000269|PubMed:10510318, ECO:0000269|PubMed:9576847}.	0.311945	0.603114	-0.40494		-0.70957	O43488	15	Aflatoxin B1 aldehyde reductase member 2	AKR7A2
16.9216	16.9544	16.1709	16.2071	15.5884	15.8314	15.9155	16.3975	16.0806	16.7211	15.0834	10.1255	9.61008	15.7371	14.3945	15.0488	17.1322	14.5599	12.8435	TISSUE SPECIFICITY: Expressed in colon, kidney, liver, pancreas, adenocarcinoma and endometrium. {ECO:0000269|PubMed:12879023, ECO:0000269|PubMed:18416522}.	0.82888	0.251576	1.47701		1.51441	O95154	13	Aflatoxin B1 aldehyde reductase member 3	AKR7A3
16.8647	17.1226	15.6647	13.2714	15.6251	19.4159	17.1295	16.1978	16.6615	15.7214	16.1996	14.0652	15.8352	16.3413	15.7687	16.172	16.8372	15.5723	15.207	NA;TISSUE SPECIFICITY: Mainly expressed in uterus. {ECO:0000269|PubMed:12879023}.	0.12536	0.818617	0.199691		0.324831	A0A499FJT0;Q8NHP1	21	Aflatoxin B1 aldehyde reductase member 4	AKR7L
15.5736	14.3796	16.3896	16.1093	15.0354	14.5587	14.1442	15.2679	15.9179	15.3607	15.0808	14.1692	14.9256	11.4001	14.3488	13.9961	12.328	14.5484	14.218	TISSUE SPECIFICITY: Expressed in prostate cancer and levels increase from the normal to the malignant state (at protein level). Expressed in all human cell types so far analyzed. The Tyr-176 phosphorylated form shows a significant increase in expression in breast cancers during the progressive stages i.e. normal to hyperplasia (ADH), ductal carcinoma in situ (DCIS), invasive ductal carcinoma (IDC…	2.26161	0.0248411	1.48487	+	3.18027	P31749	11	RAC-alpha serine/threonine-protein kinase	AKT1
14.9315	13.1252	16.1056	15.1973	14.8879	13.9846	13.1088	14.3137	14.7305	15.4029	14.4231	13.74	14.5653	13.3126	12.9606	12.6906	12.5396	13.7757	13.5342	TISSUE SPECIFICITY: Expressed in all cell types so far analyzed.	2.00516	0.0371185	1.15615	+	2.90383	P31751	10	RAC-beta serine/threonine-protein kinase	AKT2
12.6619	13.434	13.2968	12.8626	14.2385	12.952	13.1915	14.2708	13.8985	13.5333	11.5162	10.6787	10.2034	13.4033	11.5625	11.2647	10.4904	13.2716	11.9428	NA	1.59059	0.0714251	1.31044	+	2.44507	Q9H8T0;Q9H8T0-2	3	AKT-interacting protein;Isoform 2 of AKT-interacting protein	AKTIP
15.0142	15.8122	16.2822	17.6423	15.08	16.2952	15.5379	15.2556	15.8417	17.2541	15.1883	15.0975	15.9271	14.2311	15.487	15.5821	14.2554	15.0578	16.4483	NA	0.75456	0.285078	0.574322		1.41208	P13716	24	Delta-aminolevulinic acid dehydratase	ALAD
21.7483	23.2178	20.7653	22.0439	20.6687	24.4164	22.5326	20.7459	21.4726	21.9421	22.2852	21.5031	26.4476	24.884	25.0462	24.3634	25.5422	26.4375	25.989	TISSUE SPECIFICITY: Plasma.	6.08929	0	-3.58483	+	-7.53684	P02768	151	Albumin	ALB
13.8331	14.1913	16.4436	14.3791	12.8263	16.8456	14.0349	13.6131	14.9645	13.7768	13.2811	14.1699	15.8146	13.3607	13.4606	13.0089	14.41	15.0328	15.3322	NA;TISSUE SPECIFICITY: Detected on hematopoietic stem cells derived from umbilical cord blood (PubMed:24740813). Detected on lymph vessel endothelial cells, skin and tonsil (PubMed:23169771). Detected on peripheral blood monocytes (PubMed:15048703). Detected on monocyte-derived dendritic cells (at protein level) (PubMed:16352806). Detected at low levels in spleen, placenta, liver (PubMed:9502422)…	0.0110086	0.980822	0.0175735		0.0318402	F5GXJ9;Q13740;Q13740-2	16	CD166 antigen;CD166 antigen;Isoform 2 of CD166 antigen	ALCAM
15.9352	15.83	17.0644	16.9162	15.6907	16.7031	15.4916	16.1284	16.8521	17.0432	15.9281	15.4069	16.1456	14.7536	15.286	15.112	15.3846	14.9594	15.5057	NA	2.54317	0.0166608	0.94246	+	3.48041	Q8IZ83	30	Aldehyde dehydrogenase family 16 member A1	ALDH16A1
17.2365	17.7636	17.8424	18.0296	17.4734	19.4665	17.2192	17.6313	17.7019	18.6969	17.0379	17.5288	17.0121	18.443	18.0354	17.8752	16.6569	17.6023	17.0104	NA	0.413401	0.506842	0.283021		0.889766	P54886;P54886-2	66	Delta-1-pyrroline-5-carboxylate synthase;Isoform Short of Delta-1-pyrroline-5-carboxylate synthase	ALDH18A1
17.2405	18.0712	19.8138	19.343	16.3672	19.5754	19.0983	17.1985	18.9086	19.4653	19.2693	17.0957	19.934	16.5438	19.57	18.2254	18.8878	17.0569	19.5854	NA	0.0549362	0.915787	-0.089424		-0.15174	P00352	45	Retinal dehydrogenase 1	ALDH1A1
15.4583	15.5748	15.7466	15.6802	18.1294	15.6265	15.6191	11.2389	15.9502	16.8246	15.799	14.4376	15.265	14.8312	14.9217	14.3016	16.3464	15.9523	15.4284	NA	0.128841	0.814497	0.214731		0.332884	O94788	4	Retinal dehydrogenase 2	ALDH1A2
14.494	13.4135	12.5667	17.205	13.0547	15.7982	15.564	13.7279	15.6042	16.1427	15.6848	15.3474	14.9507	12.3599	13.6569	14.4378	13.9783	14.9176	15.8349	NA	0.433495	0.489976	0.578444		0.923723	H0Y2X5	8	Aldehyde dehydrogenase 1 family, member A3, isoform CRA_b	ALDH1A3
16.4692	15.8792	16.6463	17.4619	14.6331	17.2595	16.392	17.671	16.3925	16.6007	16.7969	16.5529	13.3669	16.7489	16.6986	16.3475	15.9627	16.9285	17.1379	TISSUE SPECIFICITY: Liver, testis and to a lesser extent in brain.	0.377809	0.538693	0.392798		0.828301	P30837	53	Aldehyde dehydrogenase X, mitochondrial	ALDH1B1
15.2187	17.0655	16.8175	13.9934	15.7774	18.3123	16.0364	16.5005	17.2301	16.2119	15.9085	14.5109	14.6539	13.3611	14.7542	14.9885	15.0723	14.9365	15.4647	TISSUE SPECIFICITY: Highly expressed in liver, pancreas and kidney. {ECO:0000269|PubMed:20498374}.	1.91483	0.0427192	1.3846	+	2.80539	O75891;O75891-3	38	Cytosolic 10-formyltetrahydrofolate dehydrogenase;Isoform 3 of Cytosolic 10-formyltetrahydrofolate dehydrogenase	ALDH1L1
15.2545	15.0011	15.2314	16.5604	14.7965	18.0891	15.4568	14.2778	15.8089	15.9821	14.105	15.4021	14.0881	12.6476	13.25	13.1421	13.4816	13.5761	17.2226	NA;TISSUE SPECIFICITY: Highly expressed in pancreas, heart, brain and skeletal muscle. {ECO:0000269|PubMed:20498374}.	1.79048	0.0521533	1.5817	+	2.66864	A0A494C1M4;Q3SY69	18	10-formyltetrahydrofolate dehydrogenase;Mitochondrial 10-formyltetrahydrofolate dehydrogenase	ALDH1L2
18.2972	18.9552	19.4585	18.8273	19.3899	20.3795	18.9859	19.8822	18.9726	18.9618	18.6925	18.1022	19.4999	19.5233	18.4842	18.4156	18.3377	18.549	18.5895	NA	0.52864	0.417253	0.304108		1.07811	P05091	63	Aldehyde dehydrogenase, mitochondrial	ALDH2
15.4424	16.5187	17.0544	16.9251	15.883	16.2108	15.6097	16.0991	16.9133	16.6093	15.7991	15.3433	16.2285	16.0092	15.0664	14.9669	14.8143	14.4968	15.5704	NA;TISSUE SPECIFICITY: Detected in liver (at protein level). {ECO:0000269|PubMed:9133646}.	2.14012	0.0300988	0.893162	+	3.0498	A0A5F9ZHN9;P51648;P51648-2	23	Aldehyde dehydrogenase;Aldehyde dehydrogenase family 3 member A2;Isoform 2 of Aldehyde dehydrogenase family 3 member A2	ALDH3A2
15.657	15.6262	16.6485	17.2237	14.8852	16.6028	14.6635	15.5376	15.4582	16.1896	14.6563	15.3796	15.7986	17.6609	14.8593	15.1372	14.2286	15.1369	14.1884	TISSUE SPECIFICITY: Highest expression is found in liver followed by skeletal muscle, kidney, heart, brain, placenta, lung and pancreas.	0.434397	0.489533	0.423542		0.925234	P30038	26	Delta-1-pyrroline-5-carboxylate dehydrogenase, mitochondrial	ALDH4A1
15.5043	16.7492	16.0008	17.1315	15.7537	17.173	16.5094	16.3264	17.029	17.2361	16.2073	14.5905	15.7932	16.3058	15.7734	16.6201	17.0899	15.5267	15.1545	TISSUE SPECIFICITY: Brain, pancreas, heart, liver, skeletal muscle and kidney. Lower in placenta.	0.402581	0.516113	0.313283		0.871264	P51649;P51649-2	13	Succinate-semialdehyde dehydrogenase, mitochondrial;Isoform 2 of Succinate-semialdehyde dehydrogenase, mitochondrial	ALDH5A1
15.476	17.3946	18.2043	18.7004	15.3409	18.5909	17.5916	17.5249	17.8921	18.8847	17.7559	16.2768	18.2582	15.4434	16.4566	16.7738	16.8006	15.7929	16.7115	NA	0.938289	0.210358	0.864131		1.65989	Q02252;Q02252-2	42	Methylmalonate-semialdehyde dehydrogenase [acylating], mitochondrial;Isoform 2 of Methylmalonate-semialdehyde dehydrogenase [acylating], mitochondrial	ALDH6A1
16.9355	17.976	17.7863	17.4694	16.8679	18.7087	17.7466	18.1381	18.4892	18.2961	17.3225	17.3432	17.6076	17.2858	17.0168	17.3365	16.8313	16.3465	17.9131	TISSUE SPECIFICITY: Abundant in hepatoma cells and fetal cochlea, ovary, eye, heart, adrenal gland, liver and kidney. Low levels present in adult peripheral blood leukocytes and fetal brain, thymus, spleen, skeletal muscle, lung and tongue. {ECO:0000269|PubMed:8088832, ECO:0000269|PubMed:9417906}.	1.29575	0.113509	0.565547		2.10355	P49419-2	40	Isoform 2 of Alpha-aminoadipic semialdehyde dehydrogenase	ALDH7A1
17.9818	19.0748	18.3507	19.0939	17.6826	20.3232	19.1671	18.5829	19.0479	18.4502	19.4572	18.4357	19.744	18.346	18.111	18.2552	20.0932	18.6981	18.4845	TISSUE SPECIFICITY: Detected in brain (at protein level) (PubMed:8645224). High expression in adult liver, skeletal muscle, and kidney. Low levels in heart, pancreas, lung and brain (PubMed:8786138). Expressed in all regions of the brain. Expression levels are variable in the different brain areas, with the highest levels in the spinal cord and the lowest in the occipital pole. {ECO:0000269|PubMe…	0.0147609	0.975536	-0.0148595		-0.0425159	P49189	44	4-trimethylaminobutyraldehyde dehydrogenase	ALDH9A1
13.5059	10.944	15.3223	14.1206	12.8562	16.3004	11.6005	12.8031	18.0257	13.846	12.6488	12.0296	15.3374	11.4722	18.2976	18.3311	11.0389	13.4263	18.841	NA	0.670168	0.328803	-1.58229		-1.2918	H3BPS8	1	Fructose-bisphosphate aldolase A (Fragment)	ALDOA
17.9954	17.5278	17.9885	14.3846	15.3113	16.5419	15.0437	18.4634	12.6454	17.8458	16.1343	15.5938	14.5678	14.6629	16.2044	15.0016	16.0914	14.6876	15.3531	NA	0.827802	0.25201	1.06555		1.51295	P05062	26	Fructose-bisphosphate aldolase B	ALDOB
16.5841	17.0879	17.172	16.9771	15.4454	18.7409	16.0763	16.2647	16.8076	16.9554	15.9568	14.9593	16.6396	16.7215	16.754	16.0924	16.8284	16.6349	17.0144	NA	0.0821579	0.875767	-0.0837101		-0.221109	P09972	33	Fructose-bisphosphate aldolase C	ALDOC
13.7447	13.8104	15.1228	14.1633	15.1924	12.2917	13.1004	13.6843	13.5464	15.8384	13.3075	12.8661	12.9434	12.9401	13.8606	11.0102	11.0274	10.7547	10.4019	NA	2.74385	0.0123134	2.0407	+	3.69336	Q9BT22	10	Chitobiosyldiphosphodolichol beta-mannosyltransferase	ALG1
12.1713	14.4743	15.8249	14.3078	13.8067	12.2449	15.4145	16.3209	14.6539	15.8792	15.1664	15.2472	15.1555	14.11	11.3422	11.2439	13.5579	14.2983	13.9115	NA	1.1136	0.15406	1.2518		1.8826	Q2TAA5	4	GDP-Man:Man(3)GlcNAc(2)-PP-Dol alpha-1,2-mannosyltransferase	ALG11
13.8036	13.6943	16.7761	14.7954	15.4527	11.9774	14.8742	14.3636	15.2131	12.8853	14.688	15.8067	12.6458	12.8802	12.5352	13.1592	10.6664	11.095	13.5475	TISSUE SPECIFICITY: Expressed in fibroblasts.	2.76237	0.0120599	2.16621	+	3.713	Q9BV10	2	Dol-P-Man:Man(7)GlcNAc(2)-PP-Dol alpha-1,6-mannosyltransferase	ALG12
14.6328	15.3515	12.1382	12.7694	15.4645	20.1867	15.2218	14.4099	15.0735	15.6719	14.6173	17.8629	17.0199	17.7313	16.0176	17.1234	16.3991	17.7777	18.8448	NA	1.50253	0.0823153	-1.99002	+	-2.34476	A0A096LP10;Q9NP73-2	1	Putative bifunctional UDP-N-acetylglucosamine transferase and deubiquitinase ALG13 (Fragment);Isoform 2 of Putative bifunctional UDP-N-acetylglucosamine transferase and deubiquitinase ALG13	ALG13
13.2798	15.03	16.0641	13.9969	15.2559	14.1899	14.6861	14.387	14.4146	16.5292	13.0992	15.0039	13.9288	14.1193	13.0519	13.1784	13.0589	14.0009	14.4748	NA	1.48159	0.0847002	0.973816	+	2.32072	Q9H553	13	Alpha-1,3/1,6-mannosyltransferase ALG2	ALG2
13.3308	11.3515	12.6895	13.7563	12.4479	12.8398	9.21571	12.5306	13.8738	11.5895	13.3928	14.031	12.4755	13.7844	12.8698	14.6927	12.7683	12.3477	13.3718	NA	0.511948	0.429029	-0.599736		-1.05173	H7C0X4;Q92685	3	Dol-P-Man:Man(5)GlcNAc(2)-PP-Dol alpha-1,3-mannosyltransferase (Fragment);Dol-P-Man:Man(5)GlcNAc(2)-PP-Dol alpha-1,3-mannosyltransferase	ALG3
15.2157	15.4971	13.366	14.6657	14.6119	16.0246	15.509	15.493	13.0411	14.1273	15.7741	15.2849	15.0386	15.1135	14.4603	16.1775	15.9602	14.5964	13.8828	TISSUE SPECIFICITY: Expressed in pancreas, placenta, liver, heart, brain, kidney, skeletal muscle, and lung.	0.134217	0.809135	-0.148546		-0.345242	Q9Y673	8	Dolichyl-phosphate beta-glucosyltransferase	ALG5
14.7401	15.4822	13.4875	14.8613	14.095	15.9018	15.1233	14.525	12.8611	14.2552	13.8157	12.6725	11.2122	10.8529	9.99794	10.482	11.195	11.2262	11.7721	NA	6.51851	0	3.35578	+	8.10976	Q9Y672	4	Dolichyl pyrophosphate Man9GlcNAc2 alpha-1,3-glucosyltransferase	ALG6
16.4825	14.8283	16.085	16.7345	15.5405	12.9881	11.8937	15.6326	12.621	16.626	15.3269	14.5318	11.877	12.1169	11.6117	11.6584	11.4326	10.2666	12.8017	NA	3.89148	0.00224473	3.26021	+	4.92444	Q9BVK2;Q9BVK2-2	5	Probable dolichyl pyrophosphate Glc1Man9GlcNAc2 alpha-1,3-glucosyltransferase;Isoform 2 of Probable dolichyl pyrophosphate Glc1Man9GlcNAc2 alpha-1,3-glucosyltransferase	ALG8
13.7853	12.6191	14.6828	14.9912	15.1125	13.4414	14.1493	13.3976	13.8987	15.2733	13.8173	13.6585	10.5613	12.623	12.2616	13.0169	11.7844	11.7475	13.1827	NA;TISSUE SPECIFICITY: Ubiquitously expressed;with highest levels in heart, liver and pancreas. {ECO:0000269|PubMed:12030331}.	3.75023	0.00283582	1.9007	+	4.77013	A0A087WZ62;Q9H6U8;Q9H6U8-3	10	Mannosyltransferase;Alpha-1,2-mannosyltransferase ALG9;Isoform 3 of Alpha-1,2-mannosyltransferase ALG9	ALG9
13.9648	13.5601	13.4722	15.1102	14.3075	11.2986	12.2848	13.6732	11.7488	14.3202	12.6998	12.5354	11.735	13.2604	10.9197	12.3133	12.586	10.4785	13.7388	NA;TISSUE SPECIFICITY: Detected in colon, small intestine, ovary, testis, prostate, skeletal muscle, heart, liver and urinary bladder. {ECO:0000269|PubMed:12486230, ECO:0000269|PubMed:16174769}.	1.20728	0.13126	1.10059		1.99738	F5H5X2;Q6NS38;S4R3T5	1	DNA oxidative demethylase ALKBH2 (Fragment);DNA oxidative demethylase ALKBH2;DNA oxidative demethylase ALKBH2 (Fragment)	ALKBH2
13.6044	12.7273	13.869	15.0395	13.6688	12.9029	12.8867	13.2945	13.8589	13.9969	12.439	11.8987	12.2057	11.6508	12.6077	13.3526	11.8661	12.7055	10.6538	TISSUE SPECIFICITY: Widely expressed, with highest expression in pancreas, followed by spleen, prostate, ovary and placenta. {ECO:0000269|PubMed:17979886}.	2.06895	0.0337452	1.2	+	2.97298	Q9BT30	5	Alpha-ketoglutarate-dependent dioxygenase alkB homolog 7, mitochondrial	ALKBH7
15.9938	10.8864	15.183	16.9914	12.1806	16.5392	15.2385	14.9834	15.8718	12.5497	14.3682	16.2113	15.3055	12.8828	11.7195	13.6035	13.3702	16.708	14.9399	TISSUE SPECIFICITY: Detected in monocytes and eosinophils (at protein level). Expressed in airway epithelial cells. {ECO:0000269|PubMed:21831839, ECO:0000269|PubMed:9414270}.	0.347094	0.568212	0.67414		0.77379	P16050	16	Polyunsaturated fatty acid lipoxygenase ALOX15	ALOX15
15.8981	13.4431	17.1608	17.6878	14.7134	12.4518	14.1414	15.4471	13.7303	17.5429	14.7623	14.4366	16.4003	13.0836	15.1447	14.0646	14.539	15.7101	14.2621	NA	0.217225	0.705594	0.374477		0.524913	P09917	15	Polyunsaturated fatty acid 5-lipoxygenase	ALOX5
18.4069	16.5967	19.0738	19.1087	17.3236	17.7378	17.3369	16.9296	17.8147	18.3005	16.5546	12.0217	16.9006	10.9204	11.0214	10.7811	10.1677	12.4567	10.8471	NA	4.47041	0.000941176	5.3964	+	5.57019	A0A087WW23;P20292	4	Arachidonate 5-lipoxygenase-activating protein	ALOX5AP
15.0551	12.2072	15.0129	16.9566	13.3566	12.3651	15.0552	10.7154	15.3429	14.2709	10.8968	14.0425	17.2164	12.0129	13.3603	10.8398	12.8622	14.5046	12.1746	NA	0.217192	0.705376	0.491579		0.524845	P05186	5	Alkaline phosphatase, tissue-nonspecific isozyme	ALPL
17.1149	16.8875	16.3612	16.9664	16.8608	16.8107	16.5522	16.8567	16.4607	18.3725	16.7344	16.194	15.8967	16.1005	15.7953	15.7582	17.0046	15.9081	15.5812	NA	2.45389	0.0189197	0.841303	+	3.38549	E9PB61	26	THO complex subunit 4	ALYREF
12.1686	10.6134	15.5235	17.3506	14.1051	14.2112	11.4634	12.5791	12.7378	12.8516	11.5177	10.4746	11.5737	15.0112	13.2791	15.2628	12.6654	14.95	13.0012	NA	0.369058	0.546443	-0.711279		-0.812915	D6RB81;Q9UHK6;Q9UHK6-5	7	Alpha-methylacyl-CoA racemase;Alpha-methylacyl-CoA racemase;Isoform 4 of Alpha-methylacyl-CoA racemase	AMACR
14.2539	15.5881	14.9102	16.736	13.8875	15.9485	15.2407	11.4934	15.11	16.776	14.6403	12.0009	17.7392	15.0584	15.1282	15.7643	16.3506	17.5797	16.1428	TISSUE SPECIFICITY: Expressed by the liver and secreted in plasma. Alpha-1-microglobulin occurs in many physiological fluids including plasma, urine, and cerebrospinal fluid. Inter-alpha-trypsin inhibitor is present in plasma and urine.	1.37757	0.0996758	-1.53644	+	-2.20004	P02760	9	Protein AMBP	AMBP
16.681	17.3755	16.4069	18.9135	16.1193	18.0979	16.0445	16.3841	17.1765	17.0624	16.5935	15.6455	15.9617	16.4333	15.9514	16.3655	16.6725	16.3946	15.9192	NA;TISSUE SPECIFICITY: Highly expressed in cerebellum. {ECO:0000269|PubMed:23911318}.	1.00201	0.187966	0.632455		1.74218	A0A5F9UK94;H0Y360;Q01433;Q01433-2	19	AMP deaminase;AMP deaminase;AMP deaminase 2;Isoform Ex1A-2-3 of AMP deaminase 2	AMPD2
15.9418	14.9452	16.1893	16.8879	14.622	14.9469	15.2265	14.8407	15.7637	16.4163	15.1951	14.5245	15.7532	13.3724	14.1462	12.8133	14.8414	15.6643	14.9386	NA	1.39349	0.097458	0.954134	+	2.21866	Q01432;Q01432-4;Q01432-5	15	AMP deaminase 3;Isoform 2 of AMP deaminase 3;Isoform 3 of AMP deaminase 3	AMPD3
12.4854	15.6702	14.8452	13.0545	15.2449	15.9362	15.7055	13.785	15.6835	15.7287	14.7803	13.1456	11.9399	14.69	11.6745	10.0599	14.6189	11.6069	13.8493	NA	2.06508	0.0339551	2.03787	+	2.96879	A0A1B0GTM2;P48728	8	Aminomethyltransferase;Aminomethyltransferase, mitochondrial	AMT
13.8834	14.8753	15.937	17.1108	15.3675	16.2954	14.3289	14.7402	15.8469	15.5114	14.9929	14.634	14.0546	15.3025	15.0915	14.7958	14.0992	14.3104	14.9964	NA	0.954173	0.20473	0.629306		1.68056	Q9H1A4	15	Anaphase-promoting complex subunit 1	ANAPC1
13.7955	12.427	13.4321	12.8202	13.6664	14.2285	12.4899	13.7079	13.2493	12.8533	13.425	9.81153	12.3295	12.3533	12.5455	12.4722	12.3908	12.6593	12.2207	NA	0.672166	0.327755	0.567767		1.2947	Q9UM13	3	Anaphase-promoting complex subunit 10	ANAPC10
14.0241	12.8421	15.8734	14.4911	12.398	16.8942	12.908	13.6462	12.8021	13.5638	13.3776	9.69497	12.2049	12.3494	10.4335	12.6039	12.4758	13.1568	11.5199	NA	1.18232	0.136888	1.43664		1.96706	Q96DE5	1	Anaphase-promoting complex subunit 16	ANAPC16
11.447	10.4266	13.1931	14.453	12.054	11.6462	15.3086	12.1724	12.5162	12.6466	12.2337	10.0006	10.7932	11.2616	12.2465	11.9537	10.9699	6.49877	10.8111	NA	1.33444	0.10684	1.69368	+	2.14937	F5H0F9;Q9UJX4	6	Anaphase-promoting complex subunit 5	ANAPC5
13.9499	14.7762	14.863	15.296	14.1261	17.2014	14.3899	14.1281	14.0095	15.8405	13.7483	14.9168	14.1884	14.505	13.509	14.1508	13.8229	15.6265	14.8685	NA	0.427884	0.494305	0.388885		0.914292	Q9UJX3;Q9UJX3-2	11	Anaphase-promoting complex subunit 7;Isoform 2 of Anaphase-promoting complex subunit 7	ANAPC7
12.0389	14.1233	12.7316	15.2688	11.9873	18.5608	15.1966	12.4295	13.7478	12.6891	14.218	12.3271	12.9986	12.4363	13.8033	12.8488	14.606	14.4654	13.8626	TISSUE SPECIFICITY: Expressed predominantly in the liver. Also detected in endothelial cells and spinal cord neurons. {ECO:0000269|PubMed:17886298, ECO:0000269|PubMed:2440105}.	0.0997358	0.853544	0.202154		0.264187	P03950	5	Angiogenin	ANG
13.8271	18.5062	14.0155	12.7552	14.0274	14.9467	15.5094	15.6472	14.7743	16.5696	14.0535	14.6218	17.4534	16.3502	15.2456	14.5332	14.1668	14.263	15.6863	TISSUE SPECIFICITY: Isoform Mu17, isoform Mu18, isoform Mu19 and isoform Mu20 are expressed in skeletal muscle. Isoform Br21 is expressed in brain. {ECO:0000269|PubMed:9430667}.	0.290619	0.625318	-0.447686		-0.66956	P16157;P16157-10;P16157-12;P16157-14;P16157-16;P16157-3;P16157-5;P16157-8	61	Ankyrin-1;Isoform Er9 of Ankyrin-1;Isoform Er11 of Ankyrin-1;Isoform Er13 of Ankyrin-1;Isoform Er15 of Ankyrin-1;Isoform Er5 of Ankyrin-1;Isoform Er3 of Ankyrin-1;Isoform Er7 of Ankyrin-1	ANK1
13.8788	13.6462	17.5335	15.3742	13.2282	13.2815	15.771	13.943	15.0776	15.3068	15.4519	14.0167	12.5386	10.5699	12.0305	11.8896	9.42422	11.0583	14.9271	NA;TISSUE SPECIFICITY: Present in plasma membrane of neurons as well as glial cells throughout the brain. Expressed in fetal brain and in temporal cortex of adult brain. Also expressed in the inner segments of rod photoreceptors in retina. {ECO:0000269|PubMed:1830053, ECO:0000269|PubMed:1833308, ECO:0000269|PubMed:19007774}.	3.26628	0.0058341	2.93221	+	4.24869	A0A5F9ZGX3;A0A5F9ZHD2;A0A5F9ZHS1;Q01484	28	Ankyrin-2;Ankyrin 2, neuronal, isoform CRA_b;Ankyrin-2;Ankyrin-2	ANK2
16.3024	15.8305	17.1232	16.5716	15.891	17.125	15.7043	15.9809	15.6064	17.1333	15.7895	15.6832	16.3364	15.4031	15.4643	15.2113	15.1189	15.2876	15.7404	TISSUE SPECIFICITY: High expression in whole adult brain and intermediate expression in all other tissues and specific brain regions examined, including fetal brain. {ECO:0000269|PubMed:10574462, ECO:0000269|PubMed:10940552}.	1.88224	0.0452763	0.719552	+	2.7697	Q9P2R3;Q9P2R3-4	35	Rabankyrin-5;Isoform 4 of Rabankyrin-5	ANKFY1
13.6624	13.4833	15.8147	15.3255	13.9853	13.5698	13.495	14.3731	15.7094	14.1165	14.2007	12.6459	12.6976	12.9205	12.6761	12.551	12.897	10.9052	5.82477	NA	2.36155	0.0213297	2.70246	+	3.28709	E9PDP5	8	Ankyrin repeat and KH domain-containing protein 1 (Fragment)	ANKHD1
13.1673	13.231	14.6637	14.9052	13.1968	15.5472	13.2979	12.9708	11.8367	12.4153	12.3063	11.8039	11.1979	13.5034	10.7799	10.4482	12.3664	12.8846	11.7099	NA	1.70671	0.0598109	1.43704	+	2.57558	Q86XL3	7	Ankyrin repeat and LEM domain-containing protein 2	ANKLE2
14.0606	13.6452	13.9914	13.5547	13.2527	14.3592	13.6852	13.2868	14.4853	13.7162	13.0828	12.7591	14.2103	12.9624	14.1442	13.3537	13.2434	13.3979	13.3638	NA	0.231827	0.688102	0.13151		0.554629	G3V0G5;Q8IV38	9	Ankyrin repeat and MYND domain containing 2, isoform CRA_c;Ankyrin repeat and MYND domain-containing protein 2	ANKMY2
12.7924	12.4928	14.0848	13.6379	15.4532	13.1438	12.2767	13.7613	11.7698	12.7862	13.5755	12.6936	10.8339	13.6301	12.2885	12.1771	11.3514	13.4408	11.1138	NA	1.40421	0.0959335	1.08631	+	2.23115	Q9NXR5	4	Ankyrin repeat domain-containing protein 10	ANKRD10
14.1556	12.4012	14.5659	16.5228	13.4362	15.654	12.6915	12.6863	13.9498	16.4289	13.8644	11.834	12.649	11.681	12.3726	12.5823	12.6995	12.8225	12.7973	NA	1.63032	0.067374	1.50099	+	2.48993	Q8IZ07	9	Ankyrin repeat domain-containing protein 13A	ANKRD13A
11.2604	10.5942	13.2914	12.9097	12.0283	11.6201	10.5539	11.3361	11.3965	12.9882	11.3067	11.5502	10.7856	11.2391	11.1799	12.1205	10.798	10.0364	10.98	NA	1.08917	0.160131	0.716383		1.85224	Q6P6B7;Q6P6B7-2	2	Ankyrin repeat domain-containing protein 16;Isoform 2 of Ankyrin repeat domain-containing protein 16	ANKRD16
14.6327	15.4277	16.2428	15.4283	14.9119	12.3513	15.2907	14.991	15.4872	15.7658	14.2658	14.6426	14.5014	15.2671	14.5229	14.3402	13.9292	15.7939	13.4167	NA;TISSUE SPECIFICITY: Ubiquitously expressed. {ECO:0000269|PubMed:17276651, ECO:0000269|PubMed:19150984}.	0.44739	0.479807	0.414412		0.946909	H0YM23;O75179;O75179-2;O75179-7	18	Ankyrin repeat domain-containing protein 17 (Fragment);Ankyrin repeat domain-containing protein 17;Isoform 2 of Ankyrin repeat domain-containing protein 17;Isoform 7 of Ankyrin repeat domain-containing protein 17	ANKRD17
15.5429	14.3908	14.9821	15.6273	18.0254	16.6069	15.4039	16.48	15.2848	16.0605	14.4457	14.9923	14.2577	16.1769	15.3857	15.1202	14.4603	15.0764	14.9993	NA	0.718624	0.302893	0.585483		1.36143	Q5VYY1	10	Ankyrin repeat domain-containing protein 22	ANKRD22
11.5599	12.2884	15.0578	13.1964	11.4457	13.4849	10.7568	12.0451	13.1546	15.3849	11.6004	11.4099	10.832	12.801	11.6964	12.9575	10.8592	11.2683	11.5963	NA	0.793039	0.267189	0.89958		1.46545	K7ELM1;Q96NW4	2	Ankyrin repeat domain-containing protein 27	ANKRD27
14.7823	13.2	16.0078	15.0236	15.5933	15.2276	13.5737	14.2745	11.8824	15.8691	14.0234	12.8774	10.7653	12.658	13.0372	12.8304	12.3814	14.2194	15.0828	NA	1.35444	0.103381	1.3649	+	2.17291	O15084;O15084-1;O15084-4	9	Serine/threonine-protein phosphatase 6 regulatory ankyrin repeat subunit A;Isoform 3 of Serine/threonine-protein phosphatase 6 regulatory ankyrin repeat subunit A;Isoform 4 of Serine/threonine-protein phosphatase 6 regulatory ankyrin repeat subunit A	ANKRD28
14.5392	17.0878	18.9741	18.9197	11.5741	17.3444	15.6394	15.6749	18.356	20.3394	18.4953	15.9847	17.4786	13.7209	19.0744	19.5225	15.1938	15.4102	18.9121	NA	0.042811	0.93458	-0.1339		-0.119696	K7EQM1;Q8N6D5;Q8N6D5-3	1	Ankyrin repeat domain-containing protein 29 (Fragment);Ankyrin repeat domain-containing protein 29;Isoform 3 of Ankyrin repeat domain-containing protein 29	ANKRD29
15.0448	14.6938	16.8543	15.6848	14.5048	14.9179	14.643	14.6385	14.3271	15.8077	14.6584	14.6797	15.1668	13.2901	14.0506	13.5812	13.3888	14.5877	13.3537	NA	2.32483	0.0226525	1.12093	+	3.24789	A0A2R8Y7Y4;Q8N8A2;Q8N8A2-2	16	Serine/threonine-protein phosphatase 6 regulatory ankyrin repeat subunit B;Serine/threonine-protein phosphatase 6 regulatory ankyrin repeat subunit B;Isoform 2 of Serine/threonine-protein phosphatase 6 regulatory ankyrin repeat subunit B	ANKRD44
12.2388	12.2369	13.5383	13.8518	13.0703	13.8055	11.7319	11.7192	13.0109	12.2802	11.6761	14.3	11.2878	10.4279	10.511	10.5325	11.1463	10.8054	11.7234	NA	3.87512	0.00235391	1.86913	+	4.9065	Q8NB46	2	Serine/threonine-protein phosphatase 6 regulatory ankyrin repeat subunit C	ANKRD52
15.0846	13.8341	15.7369	13.3327	15.1267	15.2956	13.0076	14.1194	13.2214	14.5884	13.3385	11.8693	13.8018	13.2033	12.9038	13.0095	12.7801	13.4185	12.9649	NA;TISSUE SPECIFICITY: Widely expressed (at protein level).	1.19159	0.13492	0.891681		1.97834	A0A3B3ISP1;Q92625	13	Ankyrin repeat and SAM domain-containing protein 1A	ANKS1A
16.4709	17.2667	16.7322	16.8382	16.1001	12.503	16.1547	16.3202	17.4521	18.3327	15.6205	17.3253	16.85	17.2065	16.5642	16.3838	16.2852	18.4283	16.1324	19) translocation. Strongly expressed in brain and testis. Expressed in fetal brain. Isoform 4 is highly expressed in brain (at protein level). Isoform 6 is expressed in brain and several cancer cell lines. {ECO:0000269|PubMed:10490826, ECO:0000269|PubMed:15347684}.;NA;TISSUE SPECIFICITY: Highly expressed in marrow from patients with pre-B ALL associated with the t(1	0.301521	0.614283	-0.409395		-0.690117	F8VR14;H0YI72;Q7Z6G8;Q7Z6G8-10;Q7Z6G8-2;Q7Z6G8-3;Q7Z6G8-4;Q7Z6G8-5;Q7Z6G8-6;Q7Z6G8-7;Q7Z6G8-8;Q7Z6G8-9;R4GN78	1	Ankyrin repeat and sterile alpha motif domain-containing protein 1B;Ankyrin repeat and sterile alpha motif domain-containing protein 1B (Fragment);Ankyrin repeat and sterile alpha motif domain-containing protein 1B;Isoform 10 of Ankyrin repeat and sterile alpha motif domain-containing protein 1B;Isoform 2 of Ankyrin repeat and sterile alpha motif domain-containing protein 1B;Isoform 3 of Ankyrin …	ANKS1B
13.2722	15.5384	16.9272	13.1262	14.3209	17.4298	15.0469	14.2003	15.5712	16.0917	13.6138	14.586	11.3077	14.2975	14.8509	14.5965	14.8329	10.6384	15.0496	TISSUE SPECIFICITY: Expressed in kidney and small intestine. {ECO:0000269|PubMed:12588794}.	1.028	0.179636	1.32367		1.77528	Q8N8V4	8	Ankyrin repeat and SAM domain-containing protein 4B	ANKS4B
15.1304	15.1177	16.6851	16.8512	16.4154	15.8307	15.956	15.0566	16.9953	17.7978	15.5376	15.551	14.7361	14.6607	14.7405	13.8108	14.4941	14.4092	15.9184	TISSUE SPECIFICITY: Highly expressed in the brain. Intermediate levels in the retina and heart and low levels in the placenta, liver, lung, duodenum, kidney, testis and spleen. In brain areas, highest expression in the frontal and occipital cortices and in the cerebellum. Lower expression in the fetal brain than in the adult brain. {ECO:0000269|PubMed:21092923}.	2.73414	0.0124509	1.39567	+	3.68307	Q9NW15	16	Anoctamin-10	ANO10
15.1627	14.1266	15.6351	17.061	15.165	14.15	14.1304	14.3691	15.4208	14.7829	14.1972	14.9525	13.4927	14.1591	12.8248	13.2465	12.4834	14.0943	14.6991	TISSUE SPECIFICITY: Expressed in embryonic stem cell, fetal liver, retina, chronic myologenous leukemia and intestinal cancer. {ECO:0000269|PubMed:15067359}.	2.4798	0.018371	1.35803	+	3.41305	Q4KMQ2;Q4KMQ2-2;Q4KMQ2-3	11	Anoctamin-6;Isoform 2 of Anoctamin-6;Isoform 3 of Anoctamin-6	ANO6
18.3177	18.0521	19.2877	18.257	19.1392	22.1546	17.7527	18.3755	17.8505	18.0161	17.6673	16.4974	17.1241	17.3782	16.9959	16.787	17.1475	17.4485	17.3025	TISSUE SPECIFICITY: Expressed in all tissues tested. Highly expressed in kidney and skeletal muscle, moderate levels of expression in brain, placenta and pancreas, and weakly expressed in lung. Found in all regions of the brain examined (amygdala, caudate nucleus, corpus callosum, hippocampus and thalamus), with highest levels in amygdala. {ECO:0000269|PubMed:15642345}.	1.57213	0.0733579	1.27823	+	2.42415	P39687	20	Acidic leucine-rich nuclear phosphoprotein 32 family member A	ANP32A
18	17.7907	17.3455	19.2162	17.3251	17.9159	17.9831	18.6813	16.5986	18.7712	17.5317	17.89	18.1506	18.0492	17.5166	17.641	18.5442	18.9879	17.1384	TISSUE SPECIFICITY: Expressed in heart, lung, pancreas, prostate and in spleen, thymus and placenta. {ECO:0000269|PubMed:9473664}.	0.0959896	0.858204	-0.0832066		-0.255112	Q92688	18	Acidic leucine-rich nuclear phosphoprotein 32 family member B	ANP32B
14.9911	15.2489	15.6215	13.6823	14.5888	15.0907	14.8873	14.7691	15.3871	12.6868	13.8558	13.8384	14.6194	14.4838	13.6901	12.9229	15.4417	14.3513	13.0956	TISSUE SPECIFICITY: Expressed in peripheral blood leukocytes, colon, small intestine, prostate, thymus, spleen, skeletal muscle, liver and kidney. {ECO:0000269|PubMed:12438741}.	0.557106	0.398056	0.467582		1.12248	Q9BTT0	14	Acidic leucine-rich nuclear phosphoprotein 32 family member E	ANP32E
15.5187	15.4931	17.7043	18.2976	15.7177	17.2868	15.5769	14.8823	16.4131	17.4734	15.4195	15.82	14.7132	13.2837	14.4177	13.9994	12.7961	15.0678	14.9871	granulocytes, monocytes, fibroblasts, endothelial cells, cerebral pericytes at the blood-brain barrier, synaptic membranes of cells in the CNS. Also expressed in endometrial stromal cells, but not in the endometrial glandular cells. Found in the vasculature of tissues that undergo angiogenesis and in malignant gliomas and lymph node metastases from multiple tumor types but not in blood vessels of…	3.34369	0.00539487	2.11955	+	4.33147	P15144	43	Aminopeptidase N	ANPEP
11.9281	13.5833	16.7842	14.9651	13.6198	11.0442	11.2421	12.596	13.301	13.0635	12.2689	14.9988	10.3995	11.7334	13.4017	11.5248	11.0268	12.6612	14.9545	TISSUE SPECIFICITY: Detected in umbilical vein endothelial cells (at protein level). Highly expressed in tumor endothelial cells. {ECO:0000269|PubMed:15777794}.	0.702923	0.311202	1.0398		1.33904	Q9H6X2;Q9H6X2-5	6	Anthrax toxin receptor 1;Isoform 5 of Anthrax toxin receptor 1	ANTXR1
12.0113	13.1534	15.7053	15.3281	12.9608	11.5125	12.0555	12.4477	14.3254	13.6174	12.7053	14.0313	11.7945	11.6476	11.3831	10.9031	11.6659	11.9861	13.2009	NA;TISSUE SPECIFICITY: Expressed in prostate, thymus, ovary, testis, pancreas, colon, heart, kidney, lung, liver, peripheral blood leukocytes, placenta, skeletal muscle, small intestine and spleen. {ECO:0000269|PubMed:14508707}.	1.91239	0.0429274	1.52387	+	2.80272	J3KPY9;P58335-4	6	Anthrax toxin receptor;Isoform 4 of Anthrax toxin receptor 2	ANTXR2
19.1907	18.9361	19.9517	19.8822	17.9015	20.4795	18.6635	18.3014	18.4173	20.1149	18.5363	19.2152	19.607	17.041	17.6744	17.6804	16.3126	18.6674	18.8331	TISSUE SPECIFICITY: Detected in resting neutrophils (PubMed:10772777). Detected in peripheral blood T-cells (PubMed:17008549). Detected in extracellular vesicles in blood serum from patients with inflammatory bowel disease, but not in serum from healthy donors (PubMed:25664854). Detected in placenta (at protein level) (PubMed:2532504). Detected in liver. {ECO:0000269|PubMed:2532504, ECO:0000269|P…	1.71952	0.0584974	1.1588	+	2.58987	P04083	62	Annexin A1	ANXA1
18.2439	17.6187	19.0952	19.8245	17.7923	19.3864	18.4672	18.2791	18.4763	19.9195	18.0845	18.0025	17.3295	17.3055	16.6197	16.7305	15.1955	17.5982	17.5228	NA	3.47571	0.00456647	1.69893	+	4.47316	P50995;P50995-2	36	Annexin A11;Isoform 2 of Annexin A11	ANXA11
16.4162	17.8012	16.8427	18.5043	14.7718	19.1297	18.2529	16.4759	18.7534	18.1008	17.1287	16.3605	15.8426	16.2772	16.4236	16.011	16.1676	16.3557	16.6551	TISSUE SPECIFICITY: Detected in epithelial cells in colon and jejunum (at protein level). Detected in epithelial cells in jejunum. {ECO:0000269|PubMed:1530946}.	1.46993	0.0861063	1.13062	+	2.30729	P27216-2	27	Isoform B of Annexin A13	ANXA13
16.9241	16.3461	16.7551	16.447	16.6207	18.3274	15.0382	17.4162	16.1724	16.9104	15.6021	16.1577	17.1879	17.633	16.9531	16.2744	15.2896	18.4645	16.9487	NA	0.446157	0.480968	-0.404675		-0.94486	P12429	47	Annexin A3	ANXA3
17.6942	17.9342	18.0628	19.215	18.6877	20.9443	18.2427	18.5726	18.4793	18.5098	18.7404	17.9085	18.6115	18.7964	18.0188	17.9842	16.3015	18.5486	18.0595	NA	0.695967	0.314438	0.536849		1.32907	P09525	61	Annexin A4	ANXA4
19.725	19.0666	19.495	20.769	18.7227	21.6554	19.6481	18.8679	20.1994	18.9541	19.2598	20.8007	20.0761	19.2204	19.2849	19.2711	16.8265	19.3531	19.3253	NA	0.868739	0.235553	0.71258		1.56807	P08758	70	Annexin A5	ANXA5
15.9713	15.5807	17.2703	16.6608	16.6208	17.52	16.3891	16.7105	16.6172	17.0836	16.9968	15.9449	15.6816	15.0659	14.5213	14.6421	12.5228	15.3169	15.7846	TISSUE SPECIFICITY: Isoform 1 is expressed in brain, heart and skeletal muscle. Isoform 2 is more abundant in liver, lung, kidney, spleen, fibroblasts and placenta. {ECO:0000269|PubMed:1825209}.	3.74957	0.00282528	1.82309	+	4.76942	P20073;P20073-2	44	Annexin A7;Isoform 2 of Annexin A7	ANXA7
15.3416	15.6462	16.2344	16.5626	14.5511	16.7304	18.0188	15.5322	17.1334	17.5291	17.6563	14.8259	13.9669	15.1638	14.7739	15.9566	16.0088	16.8206	16.0216	TISSUE SPECIFICITY: Placenta and kidney.	0.834764	0.24887	0.783169		1.52238	P19801	38	Amiloride-sensitive amine oxidase [copper-containing]	AOC1
11.9551	11.4592	13.6991	13.3864	11.7141	11.3969	11.5956	14.4784	12.5124	14.3055	16.9487	14.6667	14.9823	11.2387	15.7124	15.1268	11.3926	15.3385	15.7539	NA	0.610625	0.363613	-1.04422		-1.20392	K7EL47	1	Amine oxidase (Fragment)	AOC3
16.8256	17.6415	17.0743	17.7145	16.9177	18.027	17.5617	17.4283	17.9	17.6595	17.3752	17.2076	17.5313	17.3649	17.6489	17.1416	17.2339	17.243	17.4718	TISSUE SPECIFICITY: Widely expressed.	0.17763	0.753573	0.0679299		0.44165	Q10567;Q10567-2;Q10567-3	33	AP-1 complex subunit beta-1;Isoform B of AP-1 complex subunit beta-1;Isoform C of AP-1 complex subunit beta-1	AP1B1
15.6253	15.7796	17.1128	17.1662	15.7615	16.3654	15.4895	15.6614	16.3127	17.2297	15.6253	14.9423	15.9146	15.4598	15.232	15.1012	16.0387	15.5272	15.4464	TISSUE SPECIFICITY: Widely expressed.	1.08926	0.160147	0.557894		1.85235	O43747;O43747-2	35	AP-1 complex subunit gamma-1;Isoform 2 of AP-1 complex subunit gamma-1	AP1G1
15.2287	16.1678	15.0689	16.1819	16.6005	17.5232	16.2857	15.0493	16.4342	14.4239	13.9653	14.6852	15.7568	15.2224	15.4447	15.4471	15.3726	14.6732	14.8231	TISSUE SPECIFICITY: Expressed in all but one (skeletal muscle) tissues examined.	0.436252	0.48839	0.385981		0.928341	O75843	11	AP-1 complex subunit gamma-like 2	AP1G2
15.1016	13.6236	15.1936	15.2625	15.2978	12.9662	13.8024	15.1023	14.4975	15.9163	15.4078	13.5085	14.2312	12.3621	12.1286	12.4116	12.6133	13.4685	12.0636	NA	3.46021	0.00467989	1.8859	+	4.45648	E7ENJ6;Q9BXS5;Q9BXS5-2	8	AP-1 complex subunit mu-1;AP-1 complex subunit mu-1;Isoform 2 of AP-1 complex subunit mu-1	AP1M1
16.5363	16.2822	17.0544	16.5851	17.0574	17.9058	16.2046	16.9505	17.1291	17.6044	16.8205	15.1233	15.967	16.6111	16.4062	16.104	17.0372	15.6273	16.3191	NA	0.866594	0.236465	0.47512		1.56521	Q9Y6Q5	34	AP-1 complex subunit mu-2	AP1M2
17.9244	16.0718	16.3736	17.4457	16.2756	15.8606	15.8433	16.3789	12.3929	17.1389	16.4776	15.7713	14.0323	14.4132	14.7308	13.9413	15.4923	14.9804	13.0584	NA;TISSUE SPECIFICITY: Widely expressed. {ECO:0000269|PubMed:9733768}.	2.22523	0.0262775	1.78447	+	3.14128	A0A2R8YGH5;P61966	11	AP complex subunit sigma;AP-1 complex subunit sigma-1A	AP1S1
16.1185	16.1836	17.1875	17.4545	16.2455	17.4262	16.1305	16.0575	16.4511	16.9585	16.0967	16.8828	16.3027	15.9512	16.0276	15.8695	16.2882	16.3794	16	TISSUE SPECIFICITY: Expressed in the brain (at protein level) (PubMed:23676497). Isoform A: Expressed in forebrain, skeletal muscle, spinal cord, cerebellum, salivary gland, heart and colon. Isoform B: Widely expressed in tissues and also in breast cancer and in prostate carcinoma cells. {ECO:0000269|PubMed:23676497}.	1.3998	0.0966435	0.48247		2.22601	O95782;O95782-2	41	AP-2 complex subunit alpha-1;Isoform B of AP-2 complex subunit alpha-1	AP2A1
16.4724	16.0414	17.5171	18.0721	16.1406	17.4978	16.7424	16.9572	16.6632	17.2974	16.9976	16.7046	16.4736	16.27	16.2428	16.1487	16.4797	16.6432	16.4083	TISSUE SPECIFICITY: Expressed in the brain (at protein level). {ECO:0000269|PubMed:23676497}.	1.49941	0.0827607	0.544419	+	2.34119	O94973;O94973-2	54	AP-2 complex subunit alpha-2;Isoform 2 of AP-2 complex subunit alpha-2	AP2A2
17.2894	17.2401	18.5483	18.1718	18.4817	19.1681	18.3682	17.4191	17.899	18.3051	17.748	18.8299	18.1847	17.2091	17.6618	17.2117	17.4783	17.4479	17.5303	NA;TISSUE SPECIFICITY: Expressed in the brain (at protein level). {ECO:0000269|PubMed:23676497}.	1.49146	0.0836316	0.59042	+	2.33205	A0A087WY71;Q96CW1;Q96CW1-2	40	AP-2 complex subunit mu;AP-2 complex subunit mu;Isoform 2 of AP-2 complex subunit mu	AP2M1
17.5234	17.0061	18.3005	17.8449	17.7353	19.3742	17.9847	18.1938	17.7007	17.6785	18.1772	18.9814	17.9952	16.0983	17.6737	17.2193	14.0935	18.1573	18.3723	NA	1.15091	0.144755	0.954657		1.92863	M0QYZ2;M0R0N4;P53680	6	AP complex subunit sigma;AP complex subunit sigma;AP-2 complex subunit sigma	AP2S1
17.6876	17.6195	17.8067	18.463	17.6346	19.3512	17.575	17.5188	16.8969	18.2241	17.5615	17.5474	17.669	18.0898	17.6582	17.4388	17.9212	17.3847	17.4065	TISSUE SPECIFICITY: Ubiquitously expressed. {ECO:0000269|PubMed:9151686, ECO:0000269|PubMed:9182526}.	0.302726	0.613623	0.171274		0.692376	O00203	42	AP-3 complex subunit beta-1	AP3B1
17.0752	16.6261	16.9973	17.4041	16.9609	17.9498	16.3053	16.528	16.584	17.5643	16.3314	16.7025	16.802	16.2459	16.0111	15.9543	16.1385	16.5701	16.3939	TISSUE SPECIFICITY: Present in all adult tissues examined with the highest levels in skeletal muscle, heart, pancreas and testis. {ECO:0000269|PubMed:9151686}.	1.98912	0.0378409	0.616801	+	2.88641	O14617-5	34	Isoform 5 of AP-3 complex subunit delta-1	AP3D1
14.4366	15.0837	15.8024	15.4497	14.9591	16.9422	14.6628	13.9966	15.399	16.2025	14.1598	14.5122	14.5642	15.144	14.7196	14.3255	14.7048	14.5066	14.6876	NA	0.726506	0.299324	0.469256		1.37261	Q9Y2T2	19	AP-3 complex subunit mu-1	AP3M1
13.0844	12.7989	15.423	13.0797	13.7449	13.6157	12.9805	12.8446	13.2608	12.9645	13.3713	13.806	10.3423	12.6965	12.3143	12.8378	12.7899	11.0491	13.9477	NA	1.71021	0.0594745	1.13201	+	2.57948	E5RJ52;P53677	2	AP-3 complex subunit mu-2 (Fragment);AP-3 complex subunit mu-2	AP3M2
16.9065	16.2936	16.9459	17.2542	16.3046	18.5657	16.138	16.3213	16.029	17.0046	16.1926	15.4389	15.2494	16.07	16.0567	15.4416	16.4675	15.4826	15.5416	TISSUE SPECIFICITY: Present in all adult tissues examined. {ECO:0000269|PubMed:8697810, ECO:0000269|PubMed:9118953, ECO:0000269|PubMed:9151686}.	1.73287	0.057446	0.857738	+	2.60473	Q92572	8	AP-3 complex subunit sigma-1	AP3S1
10.9255	9.89879	12.9999	13.2175	12.7415	11.802	11.4473	11.906	12.4356	12.6928	10.6202	12.7888	11.5847	11.6472	10.59	10.7104	10.8883	12.0067	11.1856	NA;TISSUE SPECIFICITY: Widely expressed. {ECO:0000269|PubMed:10436028}.	0.963179	0.201996	0.725888		1.69223	B1ALD0;Q9Y6B7	3	AP complex subunit beta;AP-4 complex subunit beta-1	AP4B1
13.296	11.9283	14.3509	11.7783	13.3911	13.8223	12.6572	12.0985	12.81	15.514	12.9087	13.3095	12.8318	11.9831	12.8697	12.4141	10.6112	11.0768	12.6075	TISSUE SPECIFICITY: Widely expressed.	1.45961	0.0877597	1.09908	+	2.29539	Q9Y587	2	AP-4 complex subunit sigma-1	AP4S1
14.6292	13.1041	13.067	13.2802	13.1913	13.3568	11.7819	13.448	12.1713	12.6274	11.9668	11.8591	12.8262	12.3607	12.1764	12.5742	11.3473	13.4777	10.8869	NA	0.878713	0.231675	0.637982		1.58138	O43299	3	AP-5 complex subunit zeta-1	AP5Z1
15.0267	15.4986	14.902	17.4105	14.3177	14.1912	14.9674	14.2682	16.2228	15.8067	14.2633	14.7132	15.2659	14.4808	14.4226	14.1704	14.778	15.5557	13.5352	TISSUE SPECIFICITY: Ubiquitous. Highest levels of expression in adult spleen and peripheral blood leukocytes, and in fetal brain, kidney and lung. Isoform 1 is expressed in heart, kidney and liver.	0.658758	0.335629	0.531132		1.27517	O14727;O14727-4	17	Apoptotic protease-activating factor 1;Isoform 4 of Apoptotic protease-activating factor 1	APAF1
15.5607	13.0087	15.2731	16.0263	13.7724	11.0004	13.5117	13.8677	15.8346	15.7109	14.8956	13.5145	14.6623	10.7232	13.5471	13.1157	13.4776	13.6312	12.6848	TISSUE SPECIFICITY: Widely expressed with high expression in thymus, spleen, lymph node, bone marrow and peripheral leukocytes. {ECO:0000269|PubMed:14530287, ECO:0000269|PubMed:15469846}.	1.06202	0.168463	1.21115		1.81824	Q7Z5R6	6	Amyloid beta A4 precursor protein-binding family B member 1-interacting protein	APBB1IP
11.4037	8.53182	12.294	12.8972	12.3948	12.0963	12.7349	11.9882	12.3986	12.9862	10.6495	9.6627	9.94724	10.6392	10.5271	10.0263	8.99968	11.8327	10.9384	TISSUE SPECIFICITY: Expressed in a variety of tissues: brain, small intestine, colon, thymus, skeletal muscle, heart, prostate, lung, spleen, ovary, testis kidney, placenta, blood and liver (PubMed:21643010, PubMed:27217144). Isoform 1A: Very strongly expressed in brain but has relatively low expression levels in other tissues (PubMed:19527921, PubMed:21643010, PubMed:27217144). Isoform 1B: Predo…	1.32643	0.108381	1.25401	+	2.1399	P25054;P25054-2;P25054-3	2	Adenomatous polyposis coli protein;Isoform 2 of Adenomatous polyposis coli protein;Isoform 1B of Adenomatous polyposis coli protein	APC
16.0711	16.1138	17.8275	19.0563	15.3689	20.2209	15.6118	17.1436	18.014	17.5047	16.5062	15.7253	17.297	13.6222	14.4045	14.8259	14.2175	15.822	17.5716	TISSUE SPECIFICITY: Found in serum and urine. {ECO:0000269|PubMed:15174148}.	1.52022	0.0797816	1.70264	+	2.36501	P02743	14	Serum amyloid P-component	APCS
17.3473	18.1027	18.491	18.0222	18.242	20.1203	17.7811	18.0264	18.5217	18.5643	17.5767	16.5258	17.1021	17.9648	17.314	16.961	14.898	17.1365	16.802	NA	1.99821	0.0374884	1.2275	+	2.89629	C9JIF9;P13798	42	Acylamino-acid-releasing enzyme	APEH
18.0509	16.987	18.6229	18.9701	17.429	18.6918	17.2383	17.995	17.4946	16.9471	17.4695	17.2288	17.7211	17.1438	16.9087	17.6296	17.8239	17.3382	16.9645	NA	0.744757	0.289848	0.399024		1.39834	P27695	30	DNA-(apurinic or apyrimidinic site) endonuclease	APEX1
18.3616	18.1228	18.6463	19.2341	18.0928	19.4136	17.5528	18.2952	17.4895	18.7557	17.621	17.9408	17.7901	18.6452	18.1778	18.0645	18.5546	17.9751	17.6966	NA;TISSUE SPECIFICITY: Expressed in all tissues tested, including heart, brain, placenta, lung, liver, skeletal muscle, kidney and pancreas. Highest levels in heart, pancreas and placenta. Highly expressed in several cancers. Preferentially expressed in squamous cell carcinoma versus adenocarcinoma in non-small cell lung cancer. {ECO:0000269|PubMed:10780674, ECO:0000269|PubMed:11075807, ECO:00002…	0.271103	0.646054	0.164731		0.632195	G3V1C3;Q9BZZ5;Q9BZZ5-2	24	Apoptosis inhibitor 5;Apoptosis inhibitor 5;Isoform 2 of Apoptosis inhibitor 5	API5
15.291	14.3587	15.9335	15.2849	14.8558	16.4068	13.9476	13.7192	13.4548	15.0692	14.609	14.5789	15.3581	13.3586	14.8084	13.5144	14.3236	15.0107	14.1723	TISSUE SPECIFICITY: Isoform 1 is ubiquitously expressed. Isoform 2 is expressed at lower levels and detected in heart, brain, pancreas, liver, placenta, skeletal muscle and kidney. {ECO:0000269|PubMed:15262985, ECO:0000269|PubMed:23285211}.	0.531736	0.415043	0.428701		1.08297	Q96GX9	8	Methylthioribulose-1-phosphate dehydratase	APIP
13.9097	12.1478	14.4995	14.3742	12.5555	14.9797	14.5908	12.5394	14.5362	13.6877	10.8928	13.8467	14.0144	11.9457	12.2785	13.5572	12.8556	13.8545	13.307	TISSUE SPECIFICITY: Expressed in placenta, brain, heart, lung, liver, kidney and endothelial tissues.	0.373588	0.542876	0.430564		0.820893	Q06481;Q06481-3;Q06481-6	6	Amyloid-like protein 2;Isoform 3 of Amyloid-like protein 2;Isoform 6 of Amyloid-like protein 2	APLP2
17.5436	17.8775	18.7008	20.6122	18.5698	19.7272	18.4251	18.4539	17.8546	19.5005	18.2494	18.5307	17.1143	15.2593	15.9607	17.191	15.6115	18.0993	17.7152	TISSUE SPECIFICITY: Liver, glomerular and tubular structures of the kidney, endothelial cells, arterial wall and pancreatic islets of Langerhans (at protein level). Found ubiquitously in adult as well as in embryonic tissues. In adult tissue, the highest expression is found in the liver, placenta and heart. Found on the cell surface of monocytes. In embryonic tissue, the highest expression levels…	3.31444	0.00560988	1.96311	+	4.30017	Q9HDC9	29	Adipocyte plasma membrane-associated protein	APMAP
19.3695	17.9491	19.4965	20.6396	18.5898	20.9967	18.3913	17.9769	17.9199	22.2312	18.982	18.2381	22.8747	20.6322	20.8638	21.4609	21.4098	22.3654	22.5061	TISSUE SPECIFICITY: Major protein of plasma HDL, also found in chylomicrons. Synthesized in the liver and small intestine. The oxidized form at Met-110 and Met-136 is increased in individuals with increased risk for coronary artery disease, such as in carrier of the eNOSa/b genotype and exposure to cigarette smoking. It is also present in increased levels in aortic lesions relative to native ApoA…	3.28609	0.00572104	-2.49872	+	-4.26986	P02647	53	Apolipoprotein A-I	APOA1
17.8145	18.0978	16.7247	19.0408	17.5928	19.6929	17.5018	15.8717	15.9887	21.3144	17.2641	15.6923	20.0431	18.7507	19.1277	18.2082	18.4229	20.1332	20.6011	NA	1.49467	0.0832418	-1.61031	+	-2.33575	V9GYM3	10	Apolipoprotein A-II	APOA2
13.3873	14.0669	14.4625	16.2422	12.668	15.413	14.0219	12.6191	14.5581	15.8412	11.6287	12.6284	15.9395	13.0379	14.9781	15.6646	15.2933	18.2852	16.8537	TISSUE SPECIFICITY: Synthesized primarily in the intestine and secreted in plasma.	1.60817	0.0698276	-1.76034	+	-2.46496	P06727	22	Apolipoprotein A-IV	APOA4
14.6195	15.1753	16.0272	16.2629	14.0506	14.8504	15.6963	13.8911	16.3383	17.0933	15.1741	13.9754	16.4589	14.5675	15.1916	15.2565	14.7246	15.9533	15.8301	NA	0.144657	0.795946	-0.163223		-0.368964	P04114	138	Apolipoprotein B-100	APOB
12.7813	12.9729	14.9517	12.8814	13.1369	11.9398	13.6525	14.0176	11.6191	12.6772	13.1965	14.3316	12.8762	12.4158	10.3701	9.9689	11.4996	11.4062	11.6701	TISSUE SPECIFICITY: Expressed in spleen, testes, peripherical blood lymphocytes, heart, thymus, prostate and ovary. {ECO:0000269|PubMed:11863358, ECO:0000269|PubMed:20308164}.	2.74853	0.0122895	1.72175	+	3.69832	Q9NRW3	4	DNA dC->dU-editing enzyme APOBEC-3C	APOBEC3C
15.125	13.6314	14.7538	15.2535	14.3779	16.4958	14.6907	14.8435	15.4994	16.9332	15.2308	12.0332	13.8541	13.1067	13.1603	13.7284	13.9316	14.6058	13.6731	NA;TISSUE SPECIFICITY: Expressed in peripheral blood leukocytes > bone marrow = spleen > lymph node, and only faintly visible in appendix and thymus. Expressed in the brain, heart, kidney, liver, lung, pancreas, and placenta. Expressed primarily by reticuloendothelial cells: monocytes, macrophages, and endothelial cells. Expressed in atherosclerotic lesion foam cells. {ECO:0000269|PubMed:10191299…	1.50756	0.081607	1.18284	+	2.35052	A0A4V7I447;Q0VD83	56	Apolipoprotein B receptor	APOBR
16.5687	15.8943	14.4411	17.5735	16.0338	18.6712	15.9323	15.6274	14.3769	18.8811	15.3905	17.0525	19.3438	18.3345	16.9573	15.9212	17.3985	20.7022	18.8651	NA;TISSUE SPECIFICITY: Synthesized mainly in liver and to a minor degree in intestine. Also found in the lung and spleen. {ECO:0000269|PubMed:2835369}.	1.70566	0.0598651	-1.84726	+	-2.57441	K7ERI9;P02654	6	Apolipoprotein C-I (Fragment);Apolipoprotein C-I	APOC1
15.5348	17.7944	16.6251	17.6087	14.9334	19.0264	16.8195	16.7158	17.2261	17.9506	15.5377	15.628	21.4334	17.0561	17.113	16.8915	16.2148	19.1932	17.7262	NA;TISSUE SPECIFICITY: Liver. {ECO:0000269|PubMed:6328445}.	0.962745	0.202021	-1.1635		-1.69167	B0YIW2;P02656	2	Apolipoprotein C-III	APOC3
15.0838	16.5752	16.505	14.2028	12.7668	16.9334	17.3429	15.1801	19.0147	17.1276	14.7655	15.0759	19.8994	16.9702	16.5068	17.3869	14.1908	18.2816	19.2795	NA;TISSUE SPECIFICITY: Liver and intestine. {ECO:0000269|PubMed:6546757}.	1.15547	0.143715	-1.62103		-1.93422	K7ER74;P02655	3	APOC4-APOC2 readthrough (NMD candidate);Apolipoprotein C-II	APOC4-APOC2
16.1615	16.6176	17.3833	17.5804	16.1346	16.0308	16.9019	14.8843	15.9563	19.026	15.7241	14.6026	17.0971	15.9342	15.6146	16.4332	15.5159	17.5256	16.3794	NA;TISSUE SPECIFICITY: Expressed in liver, intestine, pancreas, kidney, placenta, adrenal, spleen, fetal brain tissue and tears.	0.0421231	0.935228	0.059807		0.117856	C9JF17;P05090	5	Apolipoprotein D (Fragment);Apolipoprotein D	APOD
14.7468	14.0178	15.5804	16.2356	14.4275	16.7665	14.305	14.6141	15.2421	16.1032	14.8807	14.3608	17.5614	15.2549	15.401	15.6932	16.832	18.31	15.7792	TISSUE SPECIFICITY: Produced by several tissues and cell types and mainly found associated with lipid particles in the plasma, the interstitial fluid and lymph (PubMed:25173806). Mainly synthesized by liver hepatocytes (PubMed:25173806). Significant quantities are also produced in brain, mainly by astrocytes and glial cells in the cerebral cortex, but also by neurons in frontal cortex and hippoca…	1.85153	0.0473598	-1.29785	+	-2.73597	P02649	23	Apolipoprotein E	APOE
13.8617	15.3057	16.1909	13.9494	14.1028	16.2106	15.8212	13.8	15.124	17.239	14.1081	13.6766	17.0623	15.0554	14.5426	14.8083	14.4988	15.6616	15.7001	TISSUE SPECIFICITY: Expressed by the liver and secreted in plasma.	0.323029	0.59126	-0.383564		-0.730045	P02749	22	Beta-2-glycoprotein 1	APOH
12.596	15.9563	14.2669	13.5713	13.5698	11.8371	12.9968	21.9288	12.6445	16.4773	12.3662	10.4238	14.8544	12.9393	13.3388	14.1057	12.3507	15.1119	15.4378	TISSUE SPECIFICITY: Plasma. Found on APOA-I-containing high density lipoprotein (HDL3). Expressed in pancreas, lung, prostate, liver, placenta and spleen.	0.00959329	0.983096	0.0330835		0.0277906	O14791;O14791-2;O14791-3	5	Apolipoprotein L1;Isoform 2 of Apolipoprotein L1;Isoform 3 of Apolipoprotein L1	APOL1
14.1127	13.2132	14.1808	13.4629	13.9407	15.1312	12.9761	13.4508	13.0952	14.3631	13.3152	13.7111	13.4259	12.5146	13.1907	13.1656	12.5847	14.0623	11.7516	also detected in spleen, liver, kidney, colon, small intestine, uterus, spinal cord, adrenal gland, salivary gland, trachea, mammary gland, skeletal muscle, testis and fetal brain and liver.;NA;the highest levels are found in lung, thymus, pancreas, placenta, adult brain and prostate;TISSUE SPECIFICITY: Widely expressed	1.61803	0.0685392	0.789568	+	2.47609	J3KQL8;Q9BQE5	11	Apolipoprotein L2	APOL2
11.775	11.9262	15.8791	16.6349	13.3311	18.6351	14.2503	16.3455	16.349	17.674	14.8782	13.8464	18.5754	15.8162	15.9892	16.4857	15.3074	19.4533	17.9238	NA;TISSUE SPECIFICITY: Plasma protein. Expressed in liver and kidney.	1.26967	0.118546	-1.95164		-2.07245	O95445;O95445-2;Q5SRP5	3	Apolipoprotein M;Isoform 2 of Apolipoprotein M;Apolipoprotein M	APOM
15.3608	15.0109	17.3724	19.0404	15.6793	14.1849	14.7167	16.3073	15.2418	17.8921	16.1683	11.6805	10.8057	13.2743	13.5153	13.8889	12.7738	11.6671	12.5642	NA;TISSUE SPECIFICITY: Expressed in all tissues examined. Up-regulated in diabetic heart. {ECO:0000269|PubMed:16956892}.	2.94847	0.00935987	3.07998	+	3.91041	H7C1U8;Q9BUR5	8	MICOS complex subunit (Fragment);MICOS complex subunit MIC26	APOO
16.1227	16.6844	16.4339	17.574	16.3745	18.1406	17.2512	16.6412	16.6845	17.0842	17.3759	16.7387	16.6857	16.1551	16.1945	16.3583	14.8366	15.6154	14.9497	NA	2.72494	0.0126146	1.0976	+	3.67331	A0A087WYF7;Q6UXV4	16	MICOS complex subunit;MICOS complex subunit MIC27	APOOL
15.6571	14.9007	16.7751	15.5482	15.4788	14.8675	13.9676	14.4755	14.8309	16.7949	14.2759	13.4962	13.5268	13.6249	14.2989	13.6508	14.5546	14.1952	13.7685	TISSUE SPECIFICITY: Expressed in the brain and in cerebrospinal fluid (at protein level) (PubMed:2649245). Expressed in all fetal tissues examined with highest levels in brain, kidney, heart and spleen. Weak expression in liver. In adult brain, highest expression found in the frontal lobe of the cortex and in the anterior perisylvian cortex-opercular gyri. Moderate expression in the cerebellar co…	1.92596	0.041903	1.14336	+	2.81755	P05067	18	Amyloid-beta precursor protein	APP
16.2747	14.9734	16.9524	16.6127	15.4502	16.799	15.4084	16.7368	15.3354	16.2756	15.9233	14.5952	15.6494	14.0488	14.8495	14.8569	15.7127	15.2253	14.706	TISSUE SPECIFICITY: High levels in heart, ovary, pancreas and skeletal muscle. {ECO:0000269|PubMed:10490823}.	1.86722	0.0464242	0.937816	+	2.75321	Q9UKG1	25	DCC-interacting protein 13-alpha	APPL1
14.5667	16.5478	15.527	16.5159	14.6864	16.2277	15.5383	14.8329	15.7207	16.181	15.6378	13.916	14.8977	14.3787	14.2673	14.4681	15.0236	14.8945	15.3662	TISSUE SPECIFICITY: High levels in brain, heart, kidney and skeletal muscle. {ECO:0000269|PubMed:11431708}.	1.35129	0.103831	0.734919	+	2.16921	Q8NEU8	27	DCC-interacting protein 13-beta	APPL2
17.8263	17.3794	17.5974	17.5766	17.1723	18.697	17.0707	17.072	17.4806	17.2316	16.8435	16.0131	16.7451	16.7079	15.2939	16.2236	16.8852	17.7455	15.0044	NA	1.76763	0.0543658	0.95782	+	2.64334	P07741	18	Adenine phosphoribosyltransferase	APRT
15.5215	14.9343	15.8655	16.7145	15.7822	16.5687	14.1853	14.836	15.6182	15.7074	14.4499	14.1743	14.1589	14.5218	13.7418	14.162	14.648	14.5703	13.0058	NA	2.47987	0.0183859	1.24766	+	3.41313	O60306	37	RNA helicase aquarius	AQR
14.7211	14.4609	15.0312	16.8254	15.3823	17.8033	14.9485	14.1966	15.9938	16.8385	14.9665	14.135	14.6908	14.3145	14.5606	15.4605	13.9973	14.2911	14.383	TISSUE SPECIFICITY: Predominantly in urogenital tissues.	1.1718	0.13947	0.913673		1.95421	P10398	10	Serine/threonine-protein kinase A-Raf	ARAF
14.9717	13.7356	15.458	16.3328	14.5486	14.568	13.8558	14.0236	14.217	15.4984	14.3417	14.5171	14.9081	12.1442	13.4226	12.5672	11.993	14.6112	13.6603	TISSUE SPECIFICITY: Detected in heart, skeletal muscle, spleen, kidney, liver, placenta, lung, peripheral blood leukocytes, adrenal gland, bone marrow, brain, lymph node, mammary gland, prostate, spinal cord, stomach, thyroid and trachea. {ECO:0000269|PubMed:11804590}.	2.1467	0.0297607	1.34283	+	3.05688	Q96P48;Q96P48-3	15	Arf-GAP with Rho-GAP domain, ANK repeat and PH domain-containing protein 1;Isoform 3 of Arf-GAP with Rho-GAP domain, ANK repeat and PH domain-containing protein 1	ARAP1
9.73337	12.0975	8.93444	13.2375	8.30933	15.1817	11.848	9.53545	13.2748	8.96434	8.45442	10.1486	10.7449	10.9643	10.2583	11.1102	10.9017	11.551	10.0939	NA;TISSUE SPECIFICITY: Detected in brain, thymus, lymph node, thyroid, spinal cord, trachea, heart, skeletal muscle, spleen, kidney, liver, placenta, lung and peripheral blood leukocytes. {ECO:0000269|PubMed:11804590}.	0.00253819	0.995143	0.00646897		0.00741172	A0A0C4DGW1;Q8WZ64	2	Arf-GAP with Rho-GAP domain, ANK repeat and PH domain-containing protein 2;Arf-GAP with Rho-GAP domain, ANK repeat and PH domain-containing protein 2	ARAP2
12.7611	11.8821	14.9848	14.4849	13.72	12.0531	10.7467	11.6444	12.2138	12.2811	12.1936	11.45	12.9241	11.8639	10.5843	11.5798	10.2339	10.1915	10.8254	NA	1.58854	0.0715021	1.36278	+	2.44276	Q8WWN8	3	Arf-GAP with Rho-GAP domain, ANK repeat and PH domain-containing protein 3	ARAP3
17.8844	18.1824	18.3757	17.8292	17.8569	19.0482	18.3602	17.9767	18.5959	18.9308	18.3137	17.2567	17.8674	17.5501	17.8194	17.6337	18.2186	18.0851	17.4159	TISSUE SPECIFICITY: Ubiquitously expressed.	1.21661	0.129556	0.418981		2.00868	P48444	69	Coatomer subunit delta	ARCN1
18.5899	18.8647	19.4076	18.0721	18.5814	18.7425	18.1248	19.6426	18.636	18.6743	19.8592	17.6671	18.4625	18.0818	17.8239	18.0877	18.884	18.0071	17.6086	NA	1.37707	0.0996872	0.602008	+	2.19946	P84077	29	ADP-ribosylation factor 1	ARF1
18.5262	16.187	21.3825	17.1724	19.4082	14.7357	16.6918	18.9823	18.0306	22.0632	19.3565	16.3486	16.8064	16.5064	16.2479	16.3824	16.5232	15.9547	15.7517	NA	1.47802	0.0851127	1.93002	+	2.31661	P18085	13	ADP-ribosylation factor 4	ARF4
14.1547	14.6281	17.6978	16.589	17.1116	16.7474	15.0787	15.23	16.0122	19.001	16.0038	14.1399	14.441	13.8752	12.8511	13.766	14.7432	15.6375	14.1241	NA	2.05226	0.0345301	1.82741	+	2.95492	P84085	12	ADP-ribosylation factor 5	ARF5
18.2641	17.4464	18.2822	18.3165	18.2932	17.3064	17.4653	18.0241	18.9436	19.3063	18.6323	15.913	16.9442	16.4536	16.1684	16.0444	17.1186	16.9383	16.7036	TISSUE SPECIFICITY: Ubiquitous, with higher levels in heart, substantia nigra, and kidney. {ECO:0000269|PubMed:14659046}.	2.89837	0.00993103	1.39167	+	3.85724	P62330	16	ADP-ribosylation factor 6	ARF6
15.4679	15.0965	15.6112	16.0786	15.5328	15.4827	14.9724	15.288	15.027	15.6834	14.6928	14.3672	12.7133	14.2539	13.278	13.9381	14.2793	12.97	12.8859	NA	5.59563	0.000210526	1.80095	+	6.90709	Q8N6T3	15	ADP-ribosylation factor GTPase-activating protein 1	ARFGAP1
15.7323	16.579	17.0296	15.4064	14.7313	16.9177	16.1194	15.9055	16.7228	17.3744	15.9226	15.2935	14.8673	14.8201	14.7237	14.3605	15.1461	13.8986	14.789	TISSUE SPECIFICITY: Widely expressed. Highest expression in endocrine glands (pancreas, pituitary gland, salivary gland, and prostate) and testis with a much higher expression in the testis than in the ovary. {ECO:0000269|PubMed:10704287}.	3.56513	0.00374843	1.48664	+	4.56951	Q9NP61	29	ADP-ribosylation factor GTPase-activating protein 3	ARFGAP3
16.0776	15.0354	16.8569	16.414	15.9293	15.8098	16.0109	15.8245	16.6642	17.2746	16.1702	15.4811	15.627	16.2702	15.6236	16.2361	14.8953	16.4328	15.6865	TISSUE SPECIFICITY: Expressed in placenta, lung, heart, brain, kidney and pancreas.	0.541533	0.408435	0.304532		1.0983	Q9Y6D6	48	Brefeldin A-inhibited guanine nucleotide-exchange protein 1	ARFGEF1
13.93	13.0041	13.7619	14.465	13.9062	13.5416	13.5009	13.6987	13.8671	14.4218	13.2475	12.3516	14.3021	12.8247	12.6619	12.7703	13.4534	12.6805	12.0635	TISSUE SPECIFICITY: Expressed in placenta, lung, heart, brain, kidney and pancreas.	1.41395	0.0945582	0.676186	+	2.24249	Q9Y6D5	20	Brefeldin A-inhibited guanine nucleotide-exchange protein 2	ARFGEF2
13.8563	14.2556	16.0813	15.4363	12.8272	12.6878	14.0214	14.3695	14.653	16.4061	14.2753	11.1901	13.552	13.1697	13.926	13.5634	12.8893	10.8879	10.891	TISSUE SPECIFICITY: Expressed in breast cancer cell lines. Not expressed in normal tissues such as duct, mammary gland, lung, heart, liver, kidnay, bone marrow. {ECO:0000269|PubMed:19496786}.	1.38965	0.0977302	1.47462	+	2.21417	Q5TH69	14	Brefeldin A-inhibited guanine nucleotide-exchange protein 3	ARFGEF3
15.2449	14.892	15.8347	14.6319	15.8214	15.9406	14.7761	15.0235	14.2787	17.0264	15.3556	12.8305	13.7764	14.5534	13.9464	13.7448	14.9468	14.2163	14.4754	TISSUE SPECIFICITY: Ubiquitously expressed. Higher levels in liver, pancreas, placenta, skeletal muscle and heart.	1.35266	0.10367	0.900932	+	2.17083	P53367	4	Arfaptin-1	ARFIP1
15.0271	15.0764	15.8908	12.8838	14.5981	14.8845	15.7438	15.2228	16.1602	16.5336	14.3221	13.7352	13.7001	14.8139	14.1684	13.6825	14.5296	15.0316	14.6272	NA	0.828736	0.251601	0.641771		1.51422	A0A087X1E4;P53365	10	Arfaptin-2	ARFIP2
14.7853	14.7829	12.8984	16.1886	12.9602	16.4074	14.3063	12.3192	15.2895	13.276	12.0571	13.434	14.4714	14.443	13.9837	13.9485	14.0194	11.2209	11.6438	TISSUE SPECIFICITY: Found in most tissues.	0.472876	0.458873	0.668629		0.98884	Q13795	4	ADP-ribosylation factor-related protein 1	ARFRP1
15.3984	14.445	14.0846	14.1761	13.018	12.4841	13.4891	12.9694	13.6116	15.7023	10.1286	12.3031	15.3892	10.8825	13.6492	13.5398	10.9497	14.9052	12.1285	NA;TISSUE SPECIFICITY: Within the immune system initially reported to be selectively expressed in granulocytes (polymorphonuclear leukocytes [PMNs]) (PubMed:15546957). Also detected in macrophages mycobacterial granulomas (PubMed:23749634). Expressed in group2 innate lymphoid cells (ILC2s) during lung disease (PubMed:27043409). {ECO:0000269|PubMed:15546957, ECO:0000269|PubMed:23749634}.	0.229584	0.690516	0.420753		0.550097	A0A5F9ZH78;P05089;P05089-2	5	Arginase-1;Arginase-1;Isoform 2 of Arginase-1	ARG1
16.6223	14.8646	17.4438	17.266	16.4298	19.0433	15.5736	16.2194	15.4215	16.6826	15.8227	16.5532	15.8101	16.4413	15.9474	15.9178	16.4626	16.344	15.6348	NA	0.459131	0.470031	0.415517		0.966319	Q9NWB6	14	Arginine and glutamate-rich protein 1	ARGLU1
16.9387	16.6222	16.8513	18.4101	17.0939	17.4574	16.3707	16.9815	16.8898	17.3931	16.9295	16.2736	16.6812	16.387	15.7373	15.8951	16.5516	16.764	16.329	TISSUE SPECIFICITY: Ubiquitous.	1.93761	0.0410188	0.682591	+	2.83028	Q07960	40	Rho GTPase-activating protein 1	ARHGAP1
14.2441	14.3548	12.737	15.2847	13.5498	14.9421	13.9341	13.7131	14.4204	14.2817	13.565	13.4918	14.6068	14.1704	13.9754	13.6544	13.2965	14.2463	13.4923	TISSUE SPECIFICITY: High levels of expression in heart and skeletal muscle. {ECO:0000269|PubMed:11432776}.	0.165657	0.768964	0.122937		0.415632	A1A4S6	8	Rho GTPase-activating protein 10	ARHGAP10
14.1354	14.1016	14.8754	15.5484	14.2648	15.9101	14.0836	14.2732	13.7705	15.381	13.8114	13.1417	12.8528	13.8265	13.5224	13.6363	14.0837	13.0539	12.7448	NA	2.14045	0.0300884	1.0528	+	3.05015	Q1RLN5;Q8IWW6;Q8IWW6-3;Q8IWW6-4	13	ARHGAP12 protein;Rho GTPase-activating protein 12;Isoform 3 of Rho GTPase-activating protein 12;Isoform 4 of Rho GTPase-activating protein 12	ARHGAP12
15.8198	15.4079	16.2382	16.0056	16.2098	16.908	15.7923	15.8917	16.1006	16.282	16.0372	15.1844	15.4262	15.3713	14.7884	14.912	15.4489	15.5627	14.3719	TISSUE SPECIFICITY: Ubiquitously expressed. Expressed at higher level in heart and placenta. {ECO:0000269|PubMed:11431473}.	3.15298	0.00684774	0.863889	+	4.12784	Q68EM7;Q68EM7-2	20	Rho GTPase-activating protein 17;Isoform 2 of Rho GTPase-activating protein 17	ARHGAP17
14.9143	14.0583	15.5559	16.5709	14.7668	16.8256	14.2828	15.1695	14.2486	15.8671	14.6277	14.6484	15.6152	14.5794	14.2806	14.2313	14.3792	14.5362	14.5426	NA	0.774167	0.276061	0.533069		1.43938	Q8N392;Q8N392-2	20	Rho GTPase-activating protein 18;Isoform 2 of Rho GTPase-activating protein 18	ARHGAP18
11.6354	13.1883	12.3761	13.8647	12.4322	14.7241	11.5556	11.3423	12.7768	12.6268	11.6733	10.363	11.6186	11.4296	11.2756	11.334	10.5068	11.6288	10.4904	TISSUE SPECIFICITY: Widely expressed with higher expression in brain, heart, skeletal muscle and placenta. {ECO:0000269|PubMed:12056806}.	1.6619	0.063992	1.19648	+	2.52543	Q5T5U3	8	Rho GTPase-activating protein 21	ARHGAP21
15.1293	12.2307	15.5066	14.0182	14.4497	13.5621	13.722	13.3455	13.8008	16.1162	13.8058	13.7497	13.7867	11.7915	13.0248	12.5885	12.6336	13.9818	12.6887	NA	1.75582	0.0554531	1.19175	+	2.63024	P42331;P42331-3;P42331-4;P42331-6	10	Rho GTPase-activating protein 25;Isoform 3 of Rho GTPase-activating protein 25;Isoform 4 of Rho GTPase-activating protein 25;Isoform 6 of Rho GTPase-activating protein 25	ARHGAP25
14.7703	15.5328	16.1249	15.449	15.7922	16.8992	15.2175	15.2144	15.1965	16.3883	15.064	13.5507	14.3821	14.6194	14.7762	13.7137	14.5572	13.8356	13.5103	NA	2.54094	0.01669	1.23409	+	3.47805	A0A2R8YGB3;Q9UNA1;Q9UNA1-2	9	Rho GTPase-activating protein 26;Rho GTPase-activating protein 26;Isoform 2 of Rho GTPase-activating protein 26	ARHGAP26
14.7418	15.5003	16.5109	21.6783	15.1352	16.0679	16.2522	15.2449	12.0102	16.7738	15.3007	10.2221	10.6118	15.0345	10.7687	14.3979	15.0851	14.8837	11.6064	NA;TISSUE SPECIFICITY: Expressed in germinal center B-cell, spleen, chronic lymphocytic leukemia, pancreatic cancer and lung cancer. {ECO:0000269|PubMed:15492870}.	1.10631	0.155858	2.25487		1.87356	A0A0G2JNY3;A0A0G2JRG8;E9PIR1;Q6ZUM4	10	Rho GTPase-activating protein 27	ARHGAP27
12.5806	10.4812	13.2704	12.6775	12.5349	13.1063	11.9737	10.7638	12.8659	15.5861	10.4878	10.0739	12.6779	11.2586	11.1091	11.3981	10.2139	10.5098	10.3038	NA	1.01363	0.183724	1.13286		1.75701	A0A0A0MRJ8;Q7Z6I6-3	5	Rho GTPase-activating protein 30;Isoform 3 of Rho GTPase-activating protein 30	ARHGAP30
15.5286	15.2661	15.9687	16.462	14.901	15.4609	14.5574	14.7542	12.3615	16.4862	14.2029	14.3405	15.5128	14.2202	14.7745	14.5283	13.8701	15.4472	13.936	TISSUE SPECIFICITY: Isoform 1 and isoform 2 are highly expressed in brain and testis. Isoform 1 is also expressed in other tissues such as lung, liver and spleen. {ECO:0000269|PubMed:12446789}.	0.40134	0.517037	0.411428		0.869131	A7KAX9	8	Rho GTPase-activating protein 32	ARHGAP32
14.1539	14.7205	14.1717	14.6615	13.6587	15.7307	13.6697	13.1903	14.0655	14.114	13.5361	13.9771	13.2934	13.7082	12.9926	13.4932	12.8034	13.9006	13.2259	TISSUE SPECIFICITY: Detected in neutrophils (at protein level). {ECO:0000269|PubMed:1894621}.	1.95949	0.0395397	0.792147	+	2.85415	Q9NRY4	15	Rho GTPase-activating protein 35	ARHGAP35
15.2622	13.0068	15.3121	16.6411	14.9165	15.6642	13.8828	14.3062	14.3667	15.1737	14.1259	12.5473	14.341	12.3646	13.243	13.458	13.4793	13.9134	13.3756	low levels in placenta, lung and various fetal tissues.;TISSUE SPECIFICITY: Predominantly in hematopoietic cells (spleen, thymus and leukocytes)	1.59025	0.0714441	1.14688	+	2.44469	P98171;P98171-2	22	Rho GTPase-activating protein 4;Isoform 2 of Rho GTPase-activating protein 4	ARHGAP4
13.6816	13.6721	13.9512	15.4472	13.1807	14.4112	13.6252	12.4549	16.222	13.2253	12.4283	13.6559	14.2589	12.1235	12.683	12.6104	12.8512	13.4983	11.5319	TISSUE SPECIFICITY: Expressed on cells of the hematopoietic lineage. Detected in dendritic cells and epidermal Langerhans cells. Expressed in peripheral blood mononuclear cells, in all leukemia/lymphoma cell lines. Detected also in some solid tumors and tissues such as cancerous and non-cancerous tissue. {ECO:0000269|PubMed:11965046, ECO:0000269|PubMed:8843592}.	1.29749	0.113187	1.03574		2.10561	Q92619	12	Rho GTPase-activating protein 45	ARHGAP45
12.3949	13.1527	14.2479	13.6722	13.9086	14.0473	13.6642	13.1521	12.8338	12.4788	12.1245	13.1298	13.0017	12.4429	12.4165	12.7394	13.426	13.4455	13.0539	NA;TISSUE SPECIFICITY: Detected in skin fibroblasts (at protein level) (PubMed:8537347). {ECO:0000269|PubMed:8537347}.	0.506717	0.432843	0.301628		1.0434	A0A0A0MSK6;Q13017;Q13017-2	10	Rho GTPase-activating protein 5;Rho GTPase-activating protein 5;Isoform 2 of Rho GTPase-activating protein 5	ARHGAP5
17.4268	16.5412	19.3735	18.0668	17.1503	18.293	16.2194	16.8855	15.624	19.7575	16.8673	16.4098	16.972	15.8471	16.2428	16.2223	16.5904	17.2267	16.6417	NA	0.964794	0.201355	0.849855		1.69432	P52565	34	Rho GDP-dissociation inhibitor 1	ARHGDIA
17.1623	16.2794	16.8575	16.7268	16.3585	17.5417	16.6039	15.8621	16.8609	16.7571	16.3084	17.065	18.4289	15.5478	16.3163	16.3378	16.8786	17.8369	16.5149	TISSUE SPECIFICITY: Detected in bone marrow, thymus and spleen. {ECO:0000269|PubMed:8356058}.	0.168882	0.764415	-0.138675		-0.422681	P52566	38	Rho GDP-dissociation inhibitor 2	ARHGDIB
16.4489	15.8028	16.7694	17.2699	16.2197	17.1723	15.7968	15.9184	16.6026	17.2902	15.9115	16.0306	16.021	15.6985	14.9147	15.2649	15.6532	16.2471	15.157	NA	2.43029	0.0194537	0.870906	+	3.36036	M0QZR4	42	Rho guanine nucleotide exchange factor 1	ARHGEF1
12.3568	11.3121	12.3247	13.3169	11.6603	13.9133	11.6772	11.6554	11.2505	12.884	12.6725	13.4783	11.8385	10.9426	13.4336	11.4756	11.4184	12.0216	11.9034	NA	0.650088	0.340197	0.513213		1.26246	H0YAN8;O15013;O15013-4;O15013-5;O15013-7	4	Rho guanine nucleotide exchange factor 10 (Fragment);Rho guanine nucleotide exchange factor 10;Isoform 4 of Rho guanine nucleotide exchange factor 10;Isoform 5 of Rho guanine nucleotide exchange factor 10;Isoform 3 of Rho guanine nucleotide exchange factor 10	ARHGEF10
14.1995	13.9646	14.9729	16.2234	14.4866	15.9172	13.935	14.5731	14.6255	14.9112	14.2785	13.8022	13.5206	15.1224	14.538	13.872	13.6609	13.6118	13.1428	NA;TISSUE SPECIFICITY: Detected in heart, liver, skeletal muscle, kidney and pancreas. {ECO:0000269|PubMed:16112081}.	1.30092	0.11259	0.733389	+	2.10969	Q5VXI4;Q9HCE6;Q9HCE6-2;Q9HCE6-3	22	Rho guanine nucleotide exchange factor 10-like protein;Rho guanine nucleotide exchange factor 10-like protein;Isoform 2 of Rho guanine nucleotide exchange factor 10-like protein;Isoform 3 of Rho guanine nucleotide exchange factor 10-like protein	ARHGEF10L
13.4079	14.2412	15.0424	15.716	14.0777	12.9766	13.4703	13.1973	15.6933	15.7604	13.6018	13.5785	13.004	12.8558	13.2249	13.3477	13.5248	12.3928	13.2552	TISSUE SPECIFICITY: Ubiquitously expressed. {ECO:0000269|PubMed:10026210}.	1.87089	0.0462196	1.1438	+	2.75724	O15085;O15085-2	19	Rho guanine nucleotide exchange factor 11;Isoform 2 of Rho guanine nucleotide exchange factor 11	ARHGEF11
12.5438	12.3541	14.1724	14.6085	12.076	15.8268	12.5185	12.6432	13.2732	12.9931	12.7763	13.7803	13.0362	12.1943	11.7193	11.7638	11.9788	12.5283	13.0377	NA;TISSUE SPECIFICITY: Ubiquitously expressed. Isoform 2 is found in jejunum and testis.	1.34115	0.105709	0.974559	+	2.15727	E9PMR6;Q9NZN5;Q9NZN5-2	17	Rho guanine nucleotide exchange factor 12;Rho guanine nucleotide exchange factor 12;Isoform 2 of Rho guanine nucleotide exchange factor 12	ARHGEF12
15.7039	15.3523	15.6397	15.6194	14.5088	14.4149	15.7091	15.0816	16.4844	16.6721	15.5071	13.0324	14.1036	15.609	15.2346	15.2386	15.2683	14.2054	14.6339	NA	0.484427	0.450166	0.411403		1.0076	Q5VV41	21	Rho guanine nucleotide exchange factor 16	ARHGEF16
14.708	14.2232	15.3617	17.0515	15.3488	13.8396	14.3622	14.3452	14.5329	16.0749	14.945	15.0707	13.8075	12.907	14.0435	10.7092	11.6001	10.8812	14.8774	TISSUE SPECIFICITY: Highly expressed in the heart. {ECO:0000269|PubMed:12071859}.	3.01955	0.00844524	2.29921	+	3.9859	Q96PE2	12	Rho guanine nucleotide exchange factor 17	ARHGEF17
14.0921	11.5536	14.6859	15.5462	14.2429	13.9266	12.1417	13.5563	15.118	14.2845	13.3275	13.188	12.7026	12.7342	11.9658	11.4955	13.3197	13.0516	10.9629	NA;TISSUE SPECIFICITY: Expressed in all tissues tested with highest expression in kidney and pancreas. Weakly or not expressed in liver, skeletal muscle and testis. Isoform 1: Expressed in eosinophils (PubMed:29601110). Isoform 2: Expressed in eosinophils (PubMed:29601110). Isoform 3: Expressed in eosinophils (PubMed:29601110). Isoform 4: Not detected in eosinophils (PubMed:29601110). {ECO:000026…	2.04943	0.0347699	1.48636	+	2.95185	A0A087WZG4;A0A3B3IPE9;A0A590UK10;Q6ZSZ5;Q6ZSZ5-1;Q6ZSZ5-2;Q6ZSZ5-5;Q6ZSZ5-6	11	Rho guanine nucleotide exchange factor 18;Rho guanine nucleotide exchange factor 18;Rho guanine nucleotide exchange factor 18 (Fragment);Rho guanine nucleotide exchange factor 18;Isoform 5 of Rho guanine nucleotide exchange factor 18;Isoform 4 of Rho guanine nucleotide exchange factor 18;Isoform 2 of Rho guanine nucleotide exchange factor 18;Isoform 3 of Rho guanine nucleotide exchange factor 18	ARHGEF18
15.461	15.2856	17.4217	16.6242	16.2497	16.7735	14.5668	15.0665	15.2647	17.1705	14.9801	15.5516	15.3751	14.7944	14.4129	14.4508	15.1855	15.0268	13.8232	NA	2.0291	0.03574	1.1439	+	2.92982	Q92974;Q92974-2	31	Rho guanine nucleotide exchange factor 2;Isoform 2 of Rho guanine nucleotide exchange factor 2	ARHGEF2
12.6618	11.5733	9.67162	12.708	12.2261	13.499	12.6883	12.4403	12.4753	12.8743	12.1333	11.736	12.0512	7.21456	11.8386	12.7582	11.2219	10.6607	12.7829	NA	0.844769	0.245118	1.00567		1.5359	A1IGU5	3	Rho guanine nucleotide exchange factor 37	ARHGEF37
12.4297	11.6882	15.0251	12.8149	12.6164	12.3594	11.8906	10.7757	11.966	14.2826	11.0872	11.312	12.0576	10.9474	10.0532	9.58175	11.1699	12.1592	10.4976	NA;TISSUE SPECIFICITY: Detected in brain. Detected at low levels in heart. {ECO:0000269|PubMed:10559246}.;TISSUE SPECIFICITY: Expressed at high levels in the brain, skeletal muscle and testis and at low levels in the kidney, lung, small intestine, ovary and prostate. Expression is aberrantly enhanced in most colorectal tumors. {ECO:0000269|PubMed:10873612, ECO:0000269|PubMed:17145773, ECO:0000269…	1.72838	0.057802	1.43017	+	2.59974	A0A087X0P1;A0A0A0MRY4;A0A0A6YYB3;A0A0A6YYF8;A0A0C4DFY6;A0A1B0GTF0;A0A1B0GV82;A0A1B0GV84;A0A1B0GVC4;A0A1B0GVV2;A0A1B0GWI5;A0A5F9ZGZ3;A0A5F9ZHY9;A0A5F9ZI31;B1AMR3;B1AMR4;E7EV07;E9PEM0;E9PFR9;H0YCT6;J3KQJ8;O43307;O43307-2;O43307-3;Q96N96;Q96N96-2;Q96N96-3;Q96N96-4;Q96N96-5;Q96N96-6;Q9NR80;Q9NR80-3;Q9NR80-4	1	Rho guanine nucleotide exchange factor 4;Uncharacterized protein;Rho guanine nucleotide exchange factor 9;Rho guanine nucleotide exchange factor 9;Rho guanine nucleotide exchange factor 4 (Fragment);Rho guanine nucleotide exchange factor 9 (Fragment);Rho guanine nucleotide exchange factor 9;Rho guanine nucleotide exchange factor 9;Rho guanine nucleotide exchange factor 9;Rho guanine nucleotide ex…	ARHGEF4
13.5315	12.2887	15.1599	15.205	13.7277	16.5585	13.2674	12.7475	13.0939	15.038	13.3275	13.9764	10.6008	11.1781	10.7827	11.6335	11.5103	11.922	10.0234	TISSUE SPECIFICITY: Expressed at higher level in the central nervous system and skeletal muscle and greater abundance in fetal than adult brain (at protein level). {ECO:0000269|PubMed:16143467}.	4.55836	0.000819672	2.90052	+	5.67046	Q8TER5;Q8TER5-3;Q8TER5-4	7	Rho guanine nucleotide exchange factor 40;Isoform 3 of Rho guanine nucleotide exchange factor 40;Isoform 4 of Rho guanine nucleotide exchange factor 40	ARHGEF40
13.0491	12.7375	13.4552	15.0599	13.2215	15.3557	12.7454	12.9501	13.0483	13.9677	12.9691	11.5644	11.2914	12.6733	12.1989	12.3716	12.754	13.3308	11.3201	NA	1.5281	0.0788263	1.06649	+	2.37402	A0A2R8YF49	19	Rho guanine nucleotide exchange factor 5	ARHGEF5
14.2132	13.5458	14.2117	14.745	12.7816	15.1436	13.9737	13.3126	14.4911	12.4789	13.1302	14.939	14.4134	11.6234	12.8348	12.8296	12.8312	12.658	13.6201	TISSUE SPECIFICITY: Ubiquitous.	1.45445	0.0885806	0.940936	+	2.28943	Q15052;Q15052-2	8	Rho guanine nucleotide exchange factor 6;Isoform 2 of Rho guanine nucleotide exchange factor 6	ARHGEF6
15.4368	15.4946	15.746	17.0738	15.9623	16.587	15.7966	15.4131	16.542	15.6995	15.6055	15.7992	15.4491	15.7515	15.1899	15.5689	15.7843	15.5275	15.2305	NA	1.23428	0.126177	0.429466		2.03	B1ALK7;Q14155-1	27	Rho guanine nucleotide exchange factor 7;Isoform 1 of Rho guanine nucleotide exchange factor 7	ARHGEF7
14.659	13.7296	14.192	15.4684	13.9488	16.6957	13.7395	13.1107	13.9287	15.7821	13.4187	13.5849	12.9128	13.6869	13.1851	13.4489	14.267	12.8549	12.5949	TISSUE SPECIFICITY: Highly expressed in spleen, thymus, prostate, testis, ovary, small intestine, colon, and PBL, and at a much lower level in heart, brain, placenta, lung, liver, skeletal muscle, kidney, and pancreas. {ECO:0000269|PubMed:11073988, ECO:0000269|PubMed:11318604, ECO:0000269|PubMed:12200431}.	1.56087	0.0747051	1.07622	+	2.41136	O14497	23	AT-rich interactive domain-containing protein 1A	ARID1A
14.4631	13.0538	14.5691	15.4569	14.0202	16.5481	13.4695	13.2824	13.0033	14.6377	13.3457	13.1617	12.1918	13.3858	12.8198	13.3738	13.6973	13.9857	12.9782	NA;TISSUE SPECIFICITY: Widely expressed with high levels in heart, skeletal muscle and kidney. {ECO:0000269|PubMed:11988099, ECO:0000269|PubMed:12200431, ECO:0000269|PubMed:12665591}.	1.16129	0.142218	0.879658		1.94136	A0A3F2YNW7;Q8NFD5;Q8NFD5-2;Q8NFD5-3	13	AT-rich interactive domain-containing protein 1B;AT-rich interactive domain-containing protein 1B;Isoform 2 of AT-rich interactive domain-containing protein 1B;Isoform 3 of AT-rich interactive domain-containing protein 1B	ARID1B
14.5171	14.637	14.7773	15.6995	14.1123	15.6571	13.6363	13.9024	12.1686	14.206	13.0462	14.0897	13.6916	13.828	13.3657	13.4646	13.6635	13.8917	13.7685	TISSUE SPECIFICITY: Highly expressed in heart. {ECO:0000269|PubMed:16782067}.	0.743139	0.290622	0.5365		1.39607	Q68CP9;Q68CP9-3	12	AT-rich interactive domain-containing protein 2;Isoform 2 of AT-rich interactive domain-containing protein 2	ARID2
14.1778	12.8624	16.3129	14.9176	14.3487	14.5777	14.9536	14.181	12.8785	13.0999	13.3334	14.1494	13.9874	13.6532	13.8719	13.1723	13.3371	13.781	13.1816	TISSUE SPECIFICITY: Widely expressed. {ECO:0000269|PubMed:10521492}.	0.789429	0.268765	0.580197		1.46048	Q9Y4X5	4	E3 ubiquitin-protein ligase ARIH1	ARIH1
13.9813	12.802	14.469	14.187	13.0115	13.5185	11.8832	13.2214	12.422	14.7372	13.2584	12.4398	13.9261	13.5122	13.6601	12.3382	13.5446	13.9889	13.6076	TISSUE SPECIFICITY: Widely expressed with higher expression in granulocytes. {ECO:0000269|PubMed:16118314}.	0.202128	0.722721	-0.183523		-0.493646	O95376	7	E3 ubiquitin-protein ligase ARIH2	ARIH2
17.6179	17.0365	18.6151	19.1139	17.5582	17.8437	17.3017	17.796	18.3714	18.741	16.3122	17.7238	16.8057	16.5847	16.1949	15.3585	16.3465	17.3507	15.4112	TISSUE SPECIFICITY: Detected in heart, liver, lung and liver (at protein level). Detected in fetal heart, lung, liver and kidney. Detected in adult heart, placenta, lung, liver, skeletal muscle, kidney and pancreas. {ECO:0000269|PubMed:9624189}.	3.27599	0.00575291	1.54275	+	4.25907	P40616-2	12	Isoform 2 of ADP-ribosylation factor-like protein 1	ARL1
13.8313	11.3246	15.2289	14.7441	15.074	15.1356	14.1318	14.5453	13.023	17.5092	13.9408	13.7562	11.6181	14.0136	12.5513	10.2269	12.8521	14.185	6.55751	NA	1.92372	0.0421019	2.6388	+	2.81511	A0A087WUW9;Q9NXU5	3	ADP-ribosylation factor-like protein 15	ARL15
16.9009	15.7509	18.1013	17.5119	16.804	16.8209	15.1733	15.9695	17.3631	17.0989	15.9973	16.3072	18.6298	16.7319	14.3872	15.2517	13.8648	18.2733	15.9259	NA	0.371838	0.544567	0.497859		0.817815	P36404	6	ADP-ribosylation factor-like protein 2	ARL2
14.6244	14.4099	16.0521	17.2473	14.4995	17.0651	15.5579	14.9084	15.8134	14.5093	14.7161	15.3093	16.0988	15.4054	15.9233	15.6429	15.8694	16.0321	15.508	TISSUE SPECIFICITY: Expressed in the retina. Strongly expressed in connecting cilium, the myoid region of the inner segments (IS) and in cone photoreceptors (at protein level). {ECO:0000269|PubMed:12417528}.	0.488074	0.44712	-0.39012		-1.0135	P36405	7	ADP-ribosylation factor-like protein 3	ARL3
15.9244	15.9555	15.5507	16.6572	15.4928	14.576	14.1343	15.5432	15.1813	15.7447	15.2342	13.3732	13.0712	14.7365	13.7157	13.7028	14.6211	10.9351	13.5203	NA;TISSUE SPECIFICITY: Isoforms 3 and 7 were identified in brain, pancreas, prostate, and testis, but little or no message could be detected in other tissues. {ECO:0000269|PubMed:19582790}.	2.72166	0.0126261	1.80883	+	3.66984	A0A0C4DG62;F8WCT1;Q66PJ3;Q66PJ3-2;Q66PJ3-3;Q66PJ3-7	4	ADP-ribosylation factor-like protein 6-interacting protein 4;ADP-ribosylation factor-like protein 6-interacting protein 4;ADP-ribosylation factor-like protein 6-interacting protein 4;Isoform 2 of ADP-ribosylation factor-like protein 6-interacting protein 4;Isoform 3 of ADP-ribosylation factor-like protein 6-interacting protein 4;Isoform 7 of ADP-ribosylation factor-like protein 6-interacting prot…	ARL6IP4
17.9278	15.9385	19.3981	18.7607	17.6119	15.908	16.4955	18.1623	16.6928	19.6774	17.7515	15.9443	16.1154	15.7883	16.1454	15.7886	16.1112	14.9622	16.418	NA	2.15076	0.0295378	1.61824	+	3.06126	O75915	16	PRA1 family protein 3	ARL6IP5
17.3875	16.7132	19.2718	18.8888	17.3994	18.4944	16.773	17.3232	17.925	19.5243	17.2135	17.4752	16.5896	16.0254	16.0063	15.8351	15.6042	15.9589	17.2267	TISSUE SPECIFICITY: Ubiquitously expressed. {ECO:0000269|PubMed:15331635}.	3.27104	0.00580046	1.68773	+	4.25377	Q96BM9	19	ADP-ribosylation factor-like protein 8A	ARL8A
16.3655	15.2027	16.4488	17.6556	16.8298	16.0432	14.7453	15.8372	15.5551	17.4842	15.7814	15.8578	14.7819	14.7461	13.2596	14.4292	14.0869	14.315	15.1312	TISSUE SPECIFICITY: Ubiquitously expressed. {ECO:0000269|PubMed:15331635}.	3.70748	0.00304348	1.75771	+	4.72365	Q9NVJ2	9	ADP-ribosylation factor-like protein 8B	ARL8B
14.9457	15.3827	16.1673	13.3164	15.3238	15.278	15.0115	14.8628	15.4557	14.6291	14.5474	15.4455	14.4471	15.2752	14.8823	15.0764	14.8877	13.9523	14.8499	NA	0.418968	0.502111	0.263217		0.899225	Q9NVT9	7	Armadillo repeat-containing protein 1	ARMC1
15.5667	14.57	14.7329	17.1954	15.0709	15.3686	13.5432	15.3255	14.4937	14.8396	14.9267	14.2921	13.7899	14.7492	14.2324	14.6436	13.5943	15.0435	13.9965	TISSUE SPECIFICITY: Expressed in all tissues tested with higher expression in placenta, liver, kidney, heart and brain. {ECO:0000269|PubMed:12839973}.	1.12385	0.151251	0.701004		1.89529	Q8N2F6;Q8N2F6-3	13	Armadillo repeat-containing protein 10;Isoform 3 of Armadillo repeat-containing protein 10	ARMC10
14.7294	16.4607	15.6975	16.6284	15.5067	11.5132	15.2524	14.4264	15.5675	16.0983	14.5913	14.519	14.4754	15.1366	13.8032	13.584	13.2002	14.8094	13.4639	NA	1.06656	0.167177	1.01506		1.82394	Q9UH62	16	Armadillo repeat-containing X-linked protein 3	ARMCX3
14.4378	13.3766	14.652	16.8423	15.1645	15.3466	13.7566	15.3114	12.5019	15.5288	15.7862	12.7297	13.7695	13.8838	13.3836	13.258	13.5624	14.2265	11.0929	NA	1.42969	0.0924417	1.30858	+	2.26077	Q5T2E6	9	Armadillo-like helical domain-containing protein 3	ARMH3
15.3	13.3866	16.0929	16.7018	13.9807	18.7797	12.5801	14.0579	13.5412	15.9421	14.6434	13.8983	14.4286	13.6825	13.5247	14.2504	13.9364	14.8256	13.7103	NA	0.653091	0.338805	0.857488		1.26687	Q9H993	15	Damage-control phosphatase ARMT1	ARMT1
17.076	17.789	17.5857	19.9974	17.9207	16.7948	17.4584	18.0163	18.7525	17.6247	17.5495	18.0989	16.2524	16.6598	17.3568	16.037	17.9392	17.1908	20.0647	NA	0.520035	0.423005	0.531427		1.06454	Q92747	4	Actin-related protein 2/3 complex subunit 1A	ARPC1A
17.3799	17.3974	14.1328	16.7033	18.825	20.2815	17.2897	16.9019	16.9121	12.2031	16.5117	18.104	17.3238	17.9093	16.8792	15.686	18.0282	17.6925	16.4222	NA	0.114312	0.834021	-0.247594		-0.298982	O15143	4	Actin-related protein 2/3 complex subunit 1B	ARPC1B
19.5098	18.9235	19.4825	18.7607	19.3002	20.2649	18.7584	19.0566	19.2323	19.7481	18.9025	19.1496	19.4494	19.1129	19.1124	18.9125	19.07	20.2216	18.6237	NA	0.0708057	0.892794	0.0427846		0.192592	O15144	37	Actin-related protein 2/3 complex subunit 2	ARPC2
17.3623	17.9669	17.7474	18.4506	16.8579	19.5187	17.3597	18.0851	16.758	16.7241	17.5738	17.5137	17.4208	16.9864	16.899	16.482	17.8017	17.7807	17.1345	NA	0.702279	0.311272	0.444818		1.33812	O15145	25	Actin-related protein 2/3 complex subunit 3	ARPC3
18.4025	17.4399	20.6163	18.284	19.2254	18.9173	16.7181	18.9823	16.5213	20.3059	18.5102	17.5855	17.7886	17.1515	15.7565	16.4401	17.6661	18.0367	17.2728	NA	1.56913	0.0737477	1.30016	+	2.42075	F8WCF6;P59998	16	Actin-related protein 2/3 complex subunit 4	ARPC4-TTLL3
19.7755	20.0856	19.2255	20.0356	19.9424	21.1799	19.4307	20.1316	19.7188	19.0757	20.3273	19.3757	20.1805	19.0799	19.1805	18.7925	19.9137	20.1985	19.2946	NA	0.640864	0.344748	0.338671		1.24889	O15511	13	Actin-related protein 2/3 complex subunit 5	ARPC5
19.1575	17.3976	16.545	20.0018	17.8715	19.2848	17.7416	17.8977	19.2536	18.5717	17.6847	18.3102	17.2177	17.2785	16.5389	16.4361	16.8658	17.9344	17.7364	NA	1.96817	0.0389917	1.16585	+	2.8636	Q9BPX5	12	Actin-related protein 2/3 complex subunit 5-like protein	ARPC5L
16.1424	14.1837	16.2224	16.8789	16.1922	12.6474	13.351	16.3399	12.9491	16.4889	16.0523	14.2661	10.8668	12.8587	10.5743	14.0836	12.1128	11.2275	13.9374	NA	3.0813	0.00762308	2.90558	+	4.05154	H3BMD8;P56211;P56211-2	5	cAMP-regulated phosphoprotein 19;cAMP-regulated phosphoprotein 19;Isoform ARPP-16 of cAMP-regulated phosphoprotein 19	ARPP19
16.3116	15.9867	14.7734	17.7018	14.674	17.0298	15.7852	15.9593	14.8792	16.4302	16.6556	15.4875	15.8221	15.061	15.5447	14.9621	15.6438	15.8536	15.4904	NA	0.69637	0.314439	0.490335		1.32965	P49407-2	23	Isoform 1B of Beta-arrestin-1	ARRB1
12.5272	12.995	14.6055	15.5547	15.2706	14.3686	13.3736	14.1906	14.4967	15.9431	13.2893	13.4441	12.7715	13.6958	12.9153	13.6822	11.7107	13.9496	12.8877	NA	1.49668	0.0830079	1.08404	+	2.33805	Q8N5I2	4	Arrestin domain-containing protein 1	ARRDC1
15.7761	14.4888	16.4555	16.3275	15.0219	16.6696	16.8408	15.6101	17.4581	16.1163	15.2182	14.6947	15.4768	13.1647	14.2808	15.1009	12.9413	14.0897	13.7349	NA	3.07579	0.00771648	1.77708	+	4.04568	A0A0C4DFZ2;P15289	10	Arylsulfatase A	ARSA
15.5195	14.5512	15.9182	16.5825	14.6613	15.5754	15.3457	14.8529	15.3204	15.6614	14.8506	13.5212	15.1892	12.8564	14.0917	13.7008	14.4184	14.3075	13.218	NA	2.37652	0.0209805	1.22784	+	3.30306	P15848	15	Arylsulfatase B	ARSB
13.1739	12.8141	14.5114	14.8031	12.8769	11.415	13.2316	13.2329	14.3952	13.8937	12.6197	12.3978	11.347	10.2703	12.6393	13.644	12.5886	14.6732	10.8235	TISSUE SPECIFICITY: Expressed in the pancreas, kidney, liver, lung, placenta, brain and heart.	0.980828	0.195575	0.99675		1.71501	P51689;P51689-3	3	Arylsulfatase D;Isoform 3 of Arylsulfatase D	ARSD
15.2224	13.5881	14.07	17.9383	16.1659	13.578	13.6711	15.2109	15.1026	15.2712	14.4754	12.4715	10.3831	12.5506	10.4797	12.9788	11.4768	11.4609	14.3973	NA;TISSUE SPECIFICITY: Expressed in the pancreas, liver and kidney.	3.0821	0.00764479	2.76942	+	4.05239	A0A5F9ZHX8;A0A5F9ZHZ5;F5GYY5;F5H324;P51690	15	Arylsulfatase L	ARSL
17.8255	16.4875	17.7666	18.9863	17.2835	18.0951	18.2446	17.0582	16.885	18.8694	16.9666	17.5872	18.1174	15.088	15.6428	15.6159	16.0673	15.6986	16.1303	NA;TISSUE SPECIFICITY: Broadly expressed with higher expression in heart. {ECO:0000269|PubMed:10610716}.	3.0155	0.00847772	1.61983	+	3.98159	A0A1B0GTM3;A0A1B0GTZ5;A0A1B0GUA4;A0A1B0GW68;E7EMM4;Q13510;Q13510-2	29	Acid ceramidase;Acid ceramidase;Acid ceramidase;Acid ceramidase;Acid ceramidase;Acid ceramidase;Isoform 2 of Acid ceramidase	ASAH1
14.6205	13.9204	15.0659	14.6858	13.5782	12.7068	13.7255	13.5742	12.6781	15.3292	13.4562	13.6451	13.2155	12.2677	12.933	11.603	13.2609	12.3821	9.73563	NA	2.65149	0.0142927	1.71581	+	3.5954	A0A0A0MRE5;Q9ULH1	8	Arf-GAP with SH3 domain, ANK repeat and PH domain-containing protein 1;Arf-GAP with SH3 domain, ANK repeat and PH domain-containing protein 1	ASAP1
15.2267	16.1476	14.9302	16.2052	15.0131	16.0088	14.4226	15.2798	15.6196	15.0632	14.8519	14.3093	13.415	14.2891	14.5838	13.9741	15.0139	13.7593	13.6282	TISSUE SPECIFICITY: Detected in heart, brain, placenta, kidney, monocytes and pancreas. {ECO:0000269|PubMed:10022920}.	3.05028	0.00805204	1.16173	+	4.01855	O43150	14	Arf-GAP with SH3 domain, ANK repeat and PH domain-containing protein 2	ASAP2
14.0102	14.7611	15.2868	13.4123	12.5718	14.6403	12.6947	14.2183	12.938	14.4792	13.4734	12.6807	12.8705	13.3668	12.7505	12.7913	12.6818	12.374	13.04	NA;TISSUE SPECIFICITY: Ubiquitous. {ECO:0000269|PubMed:12077347}.	1.66367	0.0638701	0.924627	+	2.52742	A0A5F9ZHP1;H0YCB3;Q8N9N2;Q8N9N2-2	8	Activating signal cointegrator 1 complex subunit 1;Activating signal cointegrator 1 complex subunit 1 (Fragment);Activating signal cointegrator 1 complex subunit 1;Isoform 2 of Activating signal cointegrator 1 complex subunit 1	ASCC1
14.8525	15.166	15.5207	17.4565	14.8983	15.003	14.2774	14.7106	15.804	14.0245	14.0592	14.8142	15.042	14.9114	14.3723	14.667	14.9185	15.0879	14.8525	TISSUE SPECIFICITY: Ubiquitous. {ECO:0000269|PubMed:12077347}.	0.249055	0.670428	0.212954		0.589063	Q9H1I8	10	Activating signal cointegrator 1 complex subunit 2	ASCC2
14.49	14.5056	15.257	15.4754	14.2435	13.705	13.8337	14.3586	15.0785	15.4831	13.7881	14.1629	13.259	13.5052	13.6572	13.0223	13.2323	12.7267	13.4383	TISSUE SPECIFICITY: Ubiquitous. {ECO:0000269|PubMed:12077347}.	3.80485	0.00260465	1.26877	+	4.82967	Q8N3C0	47	Activating signal cointegrator 1 complex subunit 3	ASCC3
13.5269	14.6739	13.6475	13.9836	15.5041	13.8026	13.4289	12.6459	12.8347	15.2566	13.3927	14.0695	11.0022	13.1008	13.6	13.331	12.7873	11.0191	10.2374	NA	2.48788	0.0180645	1.74328	+	3.42165	L0R819	3	ASNSD1 upstream open reading frame protein	ASDURF
15.1737	14.7806	14.7646	14.8097	13.7158	17.6233	11.2614	14.5946	14.9934	15.8252	13.7658	14.7365	11.4143	14.7026	14.9806	14.1185	10.9131	10.6473	15.5748	TISSUE SPECIFICITY: Ubiquitously expressed. {ECO:0000269|PubMed:12842904}.	1.04715	0.173326	1.47738		1.79952	Q9Y294	3	Histone chaperone ASF1A	ASF1A
14.1843	13.9301	15.877	15.4585	14.129	16.3043	13.846	14.0825	14.8327	15.1356	13.8596	13.7687	9.82975	13.6927	14.4016	13.8081	13.8143	14.5465	14.4438	TISSUE SPECIFICITY: Ubiquitously expressed. Predominantly expressed in adult heart and testis and fetal lung and liver, with barely detectable expression in adult lung, liver, kidney, prostate, and peripheral leukocytes. {ECO:0000269|PubMed:10393421}.	1.14969	0.144984	1.1121		1.92713	Q9UBL3-3	12	Isoform 3 of Set1/Ash2 histone methyltransferase complex subunit ASH2	ASH2L
16.5731	17.9506	17.5285	16.5547	16.9226	19.5835	17.4408	17.1988	18.4889	18.3358	17.5478	14.979	16.8036	17.2047	16.6892	17.542	18.6427	17.4218	16.751	NA	0.103416	0.849527	0.131751		0.27305	P04424	41	Argininosuccinate lyase	ASL
13.9958	13.1444	14.4789	14.8555	12.7467	14.2368	13.8322	13.5567	14.2251	12.6052	13.8036	13.223	13.3836	13.6702	13.1281	13.8484	13.9597	14.2131	13.5315	TISSUE SPECIFICITY: Widely expressed. In adult, highly expressed in pancreas, placenta, fibroblast, thymus, prostate, testis, ovary and colon. Expressed at lower levels in spleen, small intestine and leukocytes. In fetus, expressed at high levels in the lung and kidney and at lower level in brain and liver.	0.0627913	0.904285	0.0489655		0.172109	O95671;O95671-2	15	Probable bifunctional dTTP/UTP pyrophosphatase/methyltransferase protein;Isoform 2 of Probable bifunctional dTTP/UTP pyrophosphatase/methyltransferase protein	ASMTL
16.7378	15.1469	15.784	19.177	17.083	17.9096	15.1083	15.8598	12.1069	17.1414	13.6806	13.6344	11.7306	14.7443	14.1653	16.0232	15.4559	16.1254	15.1369	NA	0.579457	0.382707	1.012		1.15679	P08243;P08243-2	14	Asparagine synthetase [glutamine-hydrolyzing];Isoform 2 of Asparagine synthetase [glutamine-hydrolyzing]	ASNS
15.6443	15.3754	16.2048	16.7051	16.0893	16.1057	15.4667	15.2061	16.1563	15.9481	14.8887	15.9668	15.5049	15.7236	14.4918	15.1067	15.2919	15.3171	15.0778	TISSUE SPECIFICITY: Isoform 1 is detected in all tissues tested. Isoform 8 is mainly expressed in pancreas, heart, brain, kidney and liver. Isoform 8 is expressed in kidney (at protein level). {ECO:0000269|PubMed:11007777}.	1.79478	0.051737	0.596854	+	2.67339	Q12797	30	Aspartyl/asparaginyl beta-hydroxylase	ASPH
12.3126	11.7816	12.2169	13.7739	11.3634	11.8689	12.0508	10.9981	11.9205	13.0316	14.0567	11.2036	13.3006	11.0706	14.0167	15.3717	9.83605	10.4634	17.4898	NA	0.473589	0.458428	-0.86352		-0.990002	Q5VYL4;Q8IZT6;Q8IZT6-2	2	Abnormal spindle-like microcephaly-associated protein;Abnormal spindle-like microcephaly-associated protein;Isoform 2 of Abnormal spindle-like microcephaly-associated protein	ASPM
14.2816	15.0904	15.4663	17.3303	12.5739	17.4536	16.7714	14.1566	16.044	13.5189	16.4332	14.8117	15.7788	15.6655	16.1706	16.3957	14.2903	17.3741	17.4657	TISSUE SPECIFICITY: Higher levels in osteoarthritic articular cartilage, aorta, uterus. Moderate expression in small intestine, heart, liver, bladder, ovary, stomach, and in the adrenal, thyroid, and mammary glands. Low expression in trachea, bone marrow, and lung. Colocalizes with TGFB1 in chondrocytes within osteoarthritic (OA) lesions of articular cartilage. {ECO:0000269|PubMed:17827158}.	0.647074	0.341689	-0.835283		-1.25803	Q9BXN1	25	Asporin	ASPN
13.6071	14.864	15.4466	14.7926	14.0289	15.7129	13.9498	13.25	13.2753	14.112	13.8203	14.1846	13.6094	14.4639	13.6237	14.2563	15.5362	14.0085	14.0627	TISSUE SPECIFICITY: Ubiquitous. Highly expressed in testis, heart, skeletal muscle and pancreas. {ECO:0000269|PubMed:11244503, ECO:0000269|PubMed:11358836}.	0.0304384	0.951844	0.030719		0.0862024	Q9BZE9;Q9BZE9-2	13	Tether containing UBX domain for GLUT4;Isoform 2 of Tether containing UBX domain for GLUT4	ASPSCR1
17.948	18.0473	17.2426	17.0024	17.3821	19.2594	17.2124	18.0975	17.6021	19.143	17.4269	15.6019	17.1082	17.39	17.4371	17.3484	19.1263	17.594	16.514	TISSUE SPECIFICITY: Expressed in adult liver. {ECO:0000269|PubMed:1708740}.	0.14562	0.794688	0.161194		0.371135	P00966	48	Argininosuccinate synthase	ASS1
14.6772	14.6003	17.3215	16.5168	15.14	15.2802	14.7861	14.6586	15.5982	16.2753	15.3891	14.3556	13.6427	15.0053	14.0398	14.4257	12.7991	13.657	14.27	NA	2.58606	0.0154739	1.40616	+	3.52597	Q8NBU5	14	ATPase family AAA domain-containing protein 1	ATAD1
14.7538	12.63	16.3242	14.6344	14.6107	14.6776	12.957	13.3671	14.2969	14.7697	12.1061	10.1842	16.3489	11.7646	10.1857	12.999	12.9045	10.2357	9.23603	TISSUE SPECIFICITY: Highly expressed in estrogen receptor positive breast tumors and in osteosarcoma tumors. {ECO:0000269|PubMed:15721472, ECO:0000269|PubMed:17076897, ECO:0000269|PubMed:17660802}.	1.19382	0.134504	1.82249		1.98104	Q6PL18	10	ATPase family AAA domain-containing protein 2	ATAD2
16.9667	17.8484	17.661	18.3946	16.9467	19.02	17.1457	17.1918	17.4305	18.5431	16.9281	17.0241	16.4043	17.9468	16.5352	16.7755	14.9664	15.5775	16.718	TISSUE SPECIFICITY: Overexpressed in lung adenocarcinomas (at protein level). {ECO:0000269|PubMed:20332122}.	2.15817	0.0292603	1.17406	+	3.06923	Q9NVI7-2	48	Isoform 2 of ATPase family AAA domain-containing protein 3A	ATAD3A
15.8643	13.5589	15.137	13.3078	14.471	15.1806	14.0078	14.8325	15.2073	14.8661	14.996	13.6787	12.0926	12.9517	12.1501	12.6319	13.1622	8.54933	13.6786	NA	3.29187	0.0056342	2.41856	+	4.27604	O95260	10	Arginyl-tRNA--protein transferase 1	ATE1
15.1588	14.0958	14.108	17.9859	13.9962	13.3766	13.104	15.8115	12.253	16.5924	15.1173	13.4116	12.013	14.0185	10.3594	12.3377	13.756	13.8173	13.5875	TISSUE SPECIFICITY: Ubiquitous. {ECO:0000269|PubMed:9852036}.	1.54588	0.0765029	1.74292	+	2.3943	O94817	3	Ubiquitin-like protein ATG12	ATG12
14.1686	10.3505	14.5236	15.2894	13.5876	11.5925	11.8245	12.9939	12.7169	13.6323	14.4069	10.8542	11.8043	10.8774	10.9156	11.7624	11.3601	11.3078	10.632	NA	1.98643	0.0379675	1.75798	+	2.88348	H0YEM7	2	Autophagy-related protein 13 (Fragment)	ATG13
14.6747	14.1273	14.4524	17.1208	14.4508	16.9859	14.3212	13.8779	14.574	15.6967	14.2001	13.5282	14.4423	14.875	14.5267	14.8775	15.2157	14.8238	14.1401	NA	0.112554	0.836515	0.134005		0.294828	E7EVC7;Q676U5;Q676U5-2	13	Autophagy-related protein 16-1;Autophagy-related protein 16-1;Isoform 2 of Autophagy-related protein 16-1	ATG16L1
14.9035	14.8755	16.1114	16.1142	15.6586	19.3888	13.7622	14.352	15.6098	16.3192	13.8402	13.1101	14.9557	12.9946	14.6717	12.9907	12.929	13.5181	13.4537	TISSUE SPECIFICITY: Widely expressed, with a highest expression in heart, skeletal muscle, kidney, liver and placenta. {ECO:0000269|PubMed:11825910}.	1.65354	0.0650705	1.69235	+	2.51606	Q9NT62;Q9NT62-2	6	Ubiquitin-like-conjugating enzyme ATG3;Isoform 2 of Ubiquitin-like-conjugating enzyme ATG3	ATG3
12.9419	11.9055	16.1414	15.3285	14.3335	14.8845	14.1403	13.7707	12.7316	15.0689	14.1742	12.1205	10.694	12.8694	14.2753	14.9693	14.4683	10.7109	13.5847	NA	0.6372	0.346859	0.880098		1.24348	Q9Y4P1;Q9Y4P1-2;Q9Y4P1-6	5	Cysteine protease ATG4B;Isoform 2 of Cysteine protease ATG4B;Isoform 6 of Cysteine protease ATG4B	ATG4B
15.9347	15.7983	14.931	15.9725	13.8866	16.2776	14.7987	14.3701	13.4091	14.4625	14.5521	14.8994	15.4903	14.6217	15.0519	15.7011	14.9494	15.1132	14.6101	TISSUE SPECIFICITY: Ubiquitous. The mRNA is present at similar levels in viable and apoptotic cells, whereas the protein is dramatically highly expressed in apoptotic cells.	0.148083	0.791112	-0.135763		-0.376672	Q9H1Y0	6	Autophagy protein 5	ATG5
14.8314	14.7851	15.9768	15.4583	15.1249	14.9639	14.6411	15.0098	15.0629	17.081	14.6467	14.7338	15.1412	14.3944	14.6631	14.7638	15.0144	15.3952	14.7005	TISSUE SPECIFICITY: Widely expressed, especially in kidney, liver, lymph nodes and bone marrow. {ECO:0000269|PubMed:11890701}.	0.567226	0.391717	0.325472		1.13807	O95352	18	Ubiquitin-like modifier-activating enzyme ATG7	ATG7
11.6794	12.8679	13.8214	13.4425	13.087	13.4702	10.3516	10.5716	12.2621	14.0519	11.3176	11.5368	10.9183	12.657	10.275	10.7447	11.9056	10.0466	11.7904	NA	1.31771	0.109819	1.18058	+	2.12959	Q7Z3C6	10	Autophagy-related protein 9A	ATG9A
18.0405	18.082	18.7679	18.3358	18.7322	18.6832	17.8023	18.2329	18.0563	18.9999	17.8684	17.2608	17.6773	18.7027	17.5882	17.6506	18.823	18.174	17.7974	TISSUE SPECIFICITY: Present in the heart, brain, placenta, lung, liver, skeletal muscle, kidney, pancreas. {ECO:0000269|PubMed:9378707}.	0.333877	0.580316	0.179467		0.749882	P31939	53	Bifunctional purine biosynthesis protein ATIC	ATIC
14.6495	11.4778	15.7087	16.4904	14.896	15.7216	12.1343	13.325	14.6228	14.8676	14.117	14.5682	12.0477	10.1657	12.4843	13.6647	13.229	12.4824	13.9141	TISSUE SPECIFICITY: Expressed predominantly in the adult and fetal central nervous system. Measurable expression in all tissues examined, although expression in adult brain is at least 50-fold higher than in other tissues. Detected predominantly in pyramidal neurons in the cerebral cortex and the hippocampus of the brain. Expressed in upper and lower motor neurons (at protein level). {ECO:0000269…	1.85592	0.0472481	1.81188	+	2.7408	Q8WXF7;Q8WXF7-2	9	Atlastin-1;Isoform 2 of Atlastin-1	ATL1
14.3185	13.682	15.6278	18.0088	14.1587	14.3797	13.1662	13.2899	14.2013	15.381	13.3557	13.0829	13.2203	13.7916	12.8881	13.9215	13.4687	13.1629	13.2041	TISSUE SPECIFICITY: Expressed in peripheral tissues (at protein level). {ECO:0000269|PubMed:18270207}.	1.08112	0.162494	1.00811		1.84217	Q8NHH9	19	Atlastin-2	ATL2
16.5001	16.6204	17.7346	18.6827	16.9102	17.088	16.3051	16.5388	16.7404	17.7784	16.6827	16.8898	16.627	15.3472	16.3976	16.2087	15.8441	16.6162	16.9717	TISSUE SPECIFICITY: Expressed in the central nervous system and in dorsal root ganglia neurons. Expressed in peripheral tissues (at protein level). {ECO:0000269|PubMed:18270207, ECO:0000269|PubMed:24459106}.	1.60137	0.0702789	0.751765	+	2.45727	Q6DD88	35	Atlastin-3	ATL3
14.7729	14.0381	15.6042	16.2906	13.8029	14.1687	13.7257	14.2005	14.2545	15.1229	14.2665	15.0201	14.2257	13.6375	14.0635	14.0554	13.4095	13.8306	13.7522	TISSUE SPECIFICITY: Found in pancreas, kidney, skeletal muscle, liver, lung, placenta, brain, heart, spleen, thymus, testis, ovary, small intestine, colon and leukocytes.	1.59009	0.071435	0.752158	+	2.44451	Q13315	23	Serine-protein kinase ATM	ATM
17.0912	16.5014	16.9205	16.6026	16.1596	18.0163	16.0179	16.033	16.6747	16.6722	16.7124	16.0478	17.2345	15.7143	16.0048	16.0168	16.5921	16.0916	16.4009	TISSUE SPECIFICITY: Ubiquitous.	0.649231	0.340461	0.327228		1.2612	O00244	14	Copper transport protein ATOX1	ATOX1
16.7464	14.0959	14.4235	17.2092	15.2196	11.4835	14.4205	14.1149	12.3831	15.2987	13.5736	14.0725	15.4697	13.7728	11.1806	14.3153	12.2987	13.8689	13.6422	NA	0.642772	0.343737	0.913248		1.2517	Q9Y2G3	10	Probable phospholipid-transporting ATPase IF	ATP11B
13.8721	13.2896	14.0811	14.9903	13.2138	12.3173	13.5442	13.5519	11.8584	13.9428	13.4729	14.1627	12.485	13.3944	11.5672	11.4771	10.0255	12.0573	10.5847	NA;TISSUE SPECIFICITY: Widely expressed. {ECO:0000269|PubMed:15533723, ECO:0000269|PubMed:26567335}.	3.17059	0.00668333	1.86885	+	4.14659	A0A067XG54;Q8NB49;Q8NB49-2;Q8NB49-3;Q8NB49-4	3	Phospholipid-transporting ATPase;Phospholipid-transporting ATPase IG;Isoform 2 of Phospholipid-transporting ATPase IG;Isoform 3 of Phospholipid-transporting ATPase IG;Isoform 4 of Phospholipid-transporting ATPase IG	ATP11C
16.6509	16.3737	17.6064	17.7322	16.7392	17.4575	16.3794	16.4509	16.8485	17.3079	16.1192	16.4728	15.9652	15.9279	15.5548	15.6846	15.5549	15.772	15.5191	NA	4.21173	0.00134884	1.13365	+	5.27876	Q9HD20;Q9HD20-2	40	Manganese-transporting ATPase 13A1;Isoform B of Manganese-transporting ATPase 13A1	ATP13A1
12.6876	11.7965	13.4049	13.8326	13.1509	13.4403	11.3888	11.8336	12.6268	14.0336	10.1267	11.1835	10.9682	10.6369	10.7456	10.7697	11.3674	11.3339	10.2642	NA	2.4369	0.0194342	1.5894	+	3.36741	A0A2R8Y635;A0A2R8YDN7	4	Cation-transporting ATPase (Fragment);Cation-transporting ATPase	ATP13A3
18.7957	19.9155	19.3268	19.6959	19.7035	21.7369	19.9503	19.6811	20.2486	19.6928	20.1936	18.546	18.4358	19.4302	19.7779	19.123	18.8346	18.595	19.4741	NA	1.26736	0.119096	0.694758		2.06969	P05023;P05023-4	115	Sodium/potassium-transporting ATPase subunit alpha-1;Isoform 4 of Sodium/potassium-transporting ATPase subunit alpha-1	ATP1A1
16.549	14.9172	16.3481	16.61	10.8966	11.0297	14.5227	15.7665	15.8627	12.8556	16.0586	14.1974	10.225	14.4152	15.5375	15.5139	16.1563	11.3708	15.1841	NA	0.238101	0.681463	0.576971		0.567246	B1AKY9;P50993	4	Sodium/potassium-transporting ATPase subunit alpha;Sodium/potassium-transporting ATPase subunit alpha-2	ATP1A2
17.9782	18.4026	18.0307	19.3131	18.8922	20.8183	18.6495	18.6982	18.4545	18.1726	18.5555	17.1647	17.848	18.6352	18.499	17.7272	17.6515	17.8088	18.7873	TISSUE SPECIFICITY: Found in most tissues.	0.647008	0.341665	0.457446		1.25794	P05026;P05026-2	39	Sodium/potassium-transporting ATPase subunit beta-1;Isoform 2 of Sodium/potassium-transporting ATPase subunit beta-1	ATP1B1
16.1121	15.6229	15.8781	16.154	15.0452	17.0951	15.5949	14.9816	16.223	16.053	15.4825	16.2256	14.0446	14.8367	14.7228	14.6452	14.8798	14.6527	14.9838	NA	3.97241	0.00208295	1.19152	+	5.01336	P54709	23	Sodium/potassium-transporting ATPase subunit beta-3	ATP1B3
12.0383	15.9147	17.4459	13.8485	12.7187	15.9883	16.1791	11.1972	15.06	13.0951	11.4291	16.5573	14.1398	15.0844	15.2901	16.2637	14.9718	12.9948	15.48	TISSUE SPECIFICITY: Skeletal muscle, fast twitch muscle (type II) fibers. {ECO:0000269|PubMed:8825625}.	0.296759	0.619661	-0.599885		-0.681164	O14983;O14983-2	1	Sarcoplasmic/endoplasmic reticulum calcium ATPase 1;Isoform SERCA1A of Sarcoplasmic/endoplasmic reticulum calcium ATPase 1	ATP2A1
17.9681	18.4855	18.918	18.82	18.4521	18.9179	18.022	18.0474	18.5213	18.315	17.7061	18.2742	18.1588	17.9506	17.6094	17.676	17.5592	17.4861	17.9108	TISSUE SPECIFICITY: Isoform 1 is widely expressed in smooth muscle and nonmuscle tissues such as in adult skin epidermis, with highest expression in liver, pancreas and lung, and intermediate expression in brain, kidney and placenta. Also expressed at lower levels in heart and skeletal muscle. Isoforms 2 and 3 are highly expressed in the heart and slow twitch skeletal muscle. Expression of isofor…	2.72352	0.0126078	0.606225	+	3.67181	P16615	81	Sarcoplasmic/endoplasmic reticulum calcium ATPase 2	ATP2A2
16.7362	16.8108	17.8022	17.1005	16.2333	17.7698	17.2957	16.8563	18.1029	17.9903	17.5945	16.1846	15.9922	15.803	16.0572	16.2265	16.175	14.3221	15.0644	TISSUE SPECIFICITY: Found in most tissues. Most abundant in thymus, trachea, salivary gland, spleen, bone marrow, lymph node, peripheral leukocytes, pancreas and colon. Also detected in fetal tissues. Expressed in cell lineages of hematopoietic, epithelial, or embryonic origin and also expressed in several cancer cell lines. {ECO:0000269|PubMed:11956212, ECO:0000269|PubMed:15028735}.	3.77787	0.0026566	1.54352	+	4.80025	Q93084-2	42	Isoform SERCA3A of Sarcoplasmic/endoplasmic reticulum calcium ATPase 3	ATP2A3
15.9239	16.1921	16.1768	17.761	15.1347	16.0193	15.7741	15.2437	16.0293	16.6307	15.7864	15.7431	15.1116	14.404	14.7863	14.999	14.0954	14.2338	15.9829	TISSUE SPECIFICITY: Isoform B: Ubiquitously expressed. Isoform C: Found in brain cortex, skeletal muscle and heart muscle. Isoform D: Has only been found in fetal skeletal muscle. Isoform K: Found in small intestine and liver. Abundantly expressed in the endometrial epithelial cells and glandular epithelial cells in early-proliferative phase and early-secretory phases (PubMed:21400627). {ECO:0000…	2.92792	0.00961039	1.23273	+	3.8886	P20020;P20020-1;P20020-4;P20020-6	45	Plasma membrane calcium-transporting ATPase 1;Isoform D of Plasma membrane calcium-transporting ATPase 1;Isoform C of Plasma membrane calcium-transporting ATPase 1;Isoform K of Plasma membrane calcium-transporting ATPase 1	ATP2B1
15.9267	15.0265	17.7048	17.8249	15.0814	17.1937	15.4117	14.71	15.2132	17.3412	15.3913	15.7036	15.6234	13.9967	14.2182	14.4917	14.0812	14.744	16.5023	TISSUE SPECIFICITY: Isoform XB is the most abundant isoform and is expressed ubiquitously. Isoforms containing segment Z have only been detected in heart, while isoforms containing segment a have been found in heart, stomach and brain cortex. {ECO:0000269|PubMed:1531651}.	1.57428	0.0731201	1.23589	+	2.42659	P23634;P23634-6;P23634-7;P23634-8	30	Plasma membrane calcium-transporting ATPase 4;Isoform XB of Plasma membrane calcium-transporting ATPase 4;Isoform ZB of Plasma membrane calcium-transporting ATPase 4;Isoform ZD of Plasma membrane calcium-transporting ATPase 4	ATP2B4
13.2367	13.8542	12.8475	12.12	9.29249	13.918	13.6015	12.0865	14.223	13.2601	12.2884	11.8446	13.5288	12.4966	13.3281	11.3493	12.5033	12.115	11.0909	TISSUE SPECIFICITY: Highly expressed in the gastrointestinal and respiratory tracts, prostate, thyroid, salivary, and mammary glands (PubMed:15831496). Expressed in colon epithelial cells (at protein level). Expressed in brain and testis (at protein level) (PubMed:15677451). {ECO:0000269|PubMed:15677451, ECO:0000269|PubMed:15831496}.	0.276962	0.640295	0.369842		0.64349	O75185;O75185-2;O75185-3	5	Calcium-transporting ATPase type 2C member 2;Isoform 2 of Calcium-transporting ATPase type 2C member 2;Isoform 3 of Calcium-transporting ATPase type 2C member 2	ATP2C2
20.0448	21.0099	19.7114	19.3569	19.4091	21.5671	20.7205	21.2139	20.6693	20.6964	20.5593	19.7685	19.8628	19.9345	20.4033	19.5953	18.9678	19.9488	19.9467	TISSUE SPECIFICITY: Fetal lung, heart, liver, gut and kidney. Expressed at higher levels in the fetal brain, retina and spinal cord. {ECO:0000269|PubMed:8428659}.	1.15193	0.144494	0.585479		1.92988	P25705	108	ATP synthase subunit alpha, mitochondrial	ATP5F1A
17.2225	19.7393	19.094	18.9488	18.447	20.5191	19.6236	19.4821	19.4194	18.403	19.4123	18.6162	18.162	18.5751	19.1438	18.3569	16.9531	17.8498	18.2351	TISSUE SPECIFICITY: Isoform Heart is expressed specifically in the heart and skeletal muscle, which require rapid energy supply. Isoform Liver is expressed in the brain, liver and kidney. Isoform Heart and Isoform Liver are expressed in the skin, intestine, stomach and aorta.	1.5497	0.0760399	0.895014	+	2.39865	P36542	38	ATP synthase subunit gamma, mitochondrial	ATP5F1C
18.5531	17.9204	19.9181	17.1834	18.5007	18.7414	17.9532	19.366	16.848	21.9413	19.477	15.7575	16.609	16.1264	17.7085	17.1782	16.4803	16.6503	16.64	NA	1.87905	0.0455913	1.74295	+	2.7662	P30049	7	ATP synthase subunit delta, mitochondrial	ATP5F1D
11.3804	18.7275	14.4994	12.8564	17.706	21.4176	20.356	19.3591	17.1304	17.7059	18.603	16.8829	17.3791	16.4566	17.6925	16.4766	16.9706	17.4561	16.2972	TISSUE SPECIFICITY: Ubiquitous.	0.0833525	0.87502	0.257483		0.224078	P56381	7	ATP synthase subunit epsilon, mitochondrial	ATP5F1E
16.0985	16.1522	17.3164	17.0305	14.1589	19.3269	16.2339	15.0493	16.7297	12.6249	15.4886	15.9546	15.9657	16.4303	15.3453	15.6924	14.7745	13.8358	14.6498	NA	0.561256	0.395489	0.771732		1.12888	Q9UII2	17	ATPase inhibitor, mitochondrial	ATP5IF1
13.6728	16.3783	16.7304	17.1535	15.2119	16.7337	15.4625	16.7675	15.2375	15.8379	15.7253	15.2239	12.1776	14.5713	13.8219	13.4136	11.441	12.5244	14.7722	NA	4.01477	0.00189372	2.59859	+	5.06006	Q96IX5	4	ATP synthase membrane subunit DAPIT, mitochondrial	ATP5MD
17.9177	18.5279	19.2471	17.9949	17.3064	18.764	19.2455	17.7582	18.7907	19.7885	18.482	18.843	17.5247	16.5313	17.4241	15.9021	13.384	16.5093	18.1616	NA	3.00567	0.00854545	2.06445	+	3.97115	P56385	12	ATP synthase subunit e, mitochondrial	ATP5ME
15.0629	15.3275	16.588	17.368	15.245	15.0343	14.9958	15.7728	13.6931	18.6701	15.5982	14.6018	10.6304	15.7013	13.4026	13.5259	14.0885	10.8439	14.2994	NA	2.43343	0.019473	2.44997	+	3.36371	G3V325	12	ATP5MF-PTCD1 readthrough	ATP5MF-PTCD1
18.4154	18.9331	18.9031	18.1629	18.3613	19.8848	19.0332	18.3336	18.3566	19.3132	18.4054	18.6181	16.4971	16.2318	17.1525	16.0126	14.3326	14.8996	17.8883	NA	5.26649	0.000214286	2.5818	+	6.50293	O75964	8	ATP synthase subunit g, mitochondrial	ATP5MG
17.4596	17.5321	17.9494	16.4833	16.4875	20.5717	18.0235	17.9176	18.4569	14.4131	18.4814	16.9428	15.4456	11.2396	14.2335	13.5827	12.2527	12.5934	16.6997	NA	3.89831	0.00224681	3.83888	+	4.93192	P56378	6	ATP synthase subunit ATP5MPL, mitochondrial	ATP5MPL
16.7722	17.7727	16.7975	18.4318	16.4571	19.3524	18.2077	17.8859	17.2068	16.6538	18.0254	18.0999	17.2673	16.5234	17.6575	16.6677	15.1053	16.1282	17.5016	NA	1.43142	0.0920931	0.945597	+	2.26278	P24539	30	ATP synthase F(0) complex subunit B1, mitochondrial	ATP5PB
19.964	20.8616	19.6163	20.7406	19.2326	20.9327	21.1863	20.0181	20.632	19.5847	20.1905	20.5188	19.0024	19.3186	19.7542	19.1291	17.8997	18.2514	19.4375	NA	3.38951	0.00501587	1.31943	+	4.38057	O75947	27	ATP synthase subunit d, mitochondrial	ATP5PD
17.3847	17.431	18.7223	18.4167	17.5131	18.0636	17.0352	16.8222	18.3723	18.8301	17.6168	16.9422	17.3173	16.4528	16.5492	16.7123	14.6067	16.1518	16.5301	NA	3.03685	0.00809472	1.43106	+	4.00427	P18859;P18859-2	22	ATP synthase-coupling factor 6, mitochondrial;Isoform 2 of ATP synthase-coupling factor 6, mitochondrial	ATP5PF
19.0396	19.8403	19.1177	19.2762	18.783	21.515	19.8222	19.4116	20.0067	20.0666	19.8732	19.0941	18.4823	18.9966	19.5101	18.9566	17.3293	18.2769	18.3175	NA	2.31096	0.0230968	1.10109	+	3.23306	P48047	29	ATP synthase subunit O, mitochondrial	ATP5PO
15.2255	14.2226	15.132	16.4955	15.2291	15.966	13.9911	14.2794	13.8578	14.6368	14.2556	13.6377	16.0932	12.4248	12.9543	13.7675	13.241	14.3214	11.4762	TISSUE SPECIFICITY: widely expressed, with highest levels in brain and lowest in liver and duodenum. {ECO:0000269|PubMed:27231034}.	1.5344	0.0778951	1.27576	+	2.38121	Q15904	8	V-type proton ATPase subunit S1	ATP6AP1
13.6749	12.6302	14.7669	14.71	14.8931	12.2723	13.3262	12.7593	12.5407	13.8554	11.943	13.9361	14.6452	13.6353	13.3667	14.1212	14.0696	14.2038	12.89	NA;TISSUE SPECIFICITY: Expressed in brain, heart, placenta, liver, kidney and pancreas. Barely detectable in lung and skeletal muscles. In the kidney cortex it is restricted to the mesangium of glomeruli. In the coronary and kidney artery it is expressed in the subendothelium, associated to smooth muscles where it colocalizes with REN. Expressed in vascular structures and by syncytiotrophoblast c…	0.450907	0.47667	-0.405052		-0.95274	A0A1B0GTB0;A0A1B0GUT7;A0A1B0GVW0;B7Z1I9;O75787;O75787-2	5	Renin receptor (Fragment);Renin receptor;Renin receptor;Renin receptor;Renin receptor;Isoform 2 of Renin receptor	ATP6AP2
15.6648	15.1395	16.9086	17.6591	14.4364	15.9397	15.0167	14.8312	15.9437	16.7144	14.9273	15.0581	15.1329	14.6834	13.6259	14.0495	13.1229	12.2077	13.9287	NA	3.04407	0.00805882	1.86505	+	4.01195	Q93050;Q93050-1;Q93050-3	27	V-type proton ATPase 116 kDa subunit a1;Isoform 2 of V-type proton ATPase 116 kDa subunit a1;Isoform 3 of V-type proton ATPase 116 kDa subunit a1	ATP6V0A1
12.8171	14.1545	14.6084	14.4972	13.6227	12.5625	12.9084	13.0886	11.9007	14.9759	12.8644	12.7118	12.9061	13.4988	10.7863	12.0784	12.5464	12.6163	10.5011	NA	1.73743	0.0570347	1.25937	+	2.6098	Q9Y487	6	V-type proton ATPase 116 kDa subunit a2	ATP6V0A2
15.7413	13.4793	14.8519	15.9973	15.1496	14.8605	14.4991	14.5336	12.6586	15.0135	15.1629	14.3168	10.7766	11.5455	11.6435	11.1342	9.71604	11.8191	10.4552	NA	7.13511	0	3.67583	+	8.9789	P27449	5	V-type proton ATPase 16 kDa proteolipid subunit	ATP6V0C
16.5904	17.1412	17.3667	18.0872	17.274	19.1177	16.6863	16.8262	16.9557	17.3791	16.1892	17.5894	17.767	16.8615	16.4115	16.494	15.7513	17.8959	15.4141	NA;TISSUE SPECIFICITY: Ubiquitous. {ECO:0000269|PubMed:12384298, ECO:0000269|PubMed:8250920}.	0.850761	0.24267	0.610442		1.54397	F5GYQ1;P61421;R4GN72	12	V-type proton ATPase subunit;V-type proton ATPase subunit d 1;V-type proton ATPase subunit d 1	ATP6V0D1
15.9572	16.6379	17.7035	17.1281	15.4446	17.7459	16.1685	16.1149	16.0034	17.7091	15.6689	15.8815	16.7679	15.4202	15.8959	15.3219	16.0663	16.3871	16.0117	localizes to early distal nephron, encompassing thick ascending limbs and distal convoluted tubules (at protein level). {ECO:0000269|PubMed:29993276}.;TISSUE SPECIFICITY: Kidney	0.820998	0.254877	0.532042		1.5037	P21281	24	V-type proton ATPase subunit B, brain isoform	ATP6V1B2
14.6518	15.363	15.2109	15.3482	14.8951	16.1689	14.9187	14.6764	15.4097	16.8123	14.4816	14.7408	15.641	14.1353	14.2632	14.3961	14.4575	14.7231	14.2336	NA	1.4236	0.0930337	0.673158	+	2.25371	E7EV59	19	V-type proton ATPase subunit C	ATP6V1C1
14.3498	14.9459	15.6763	15.6967	15.0274	16.183	14.8149	14.5024	15.9753	17.0281	15.5442	12.7776	15.466	13.4845	11.9201	13.4258	14.6062	14.3445	14.4814	NA	1.5383	0.0773537	1.24893	+	2.38566	Q9Y5K8	9	V-type proton ATPase subunit D	ATP6V1D
17.5375	17.3798	17.8895	19.036	16.7132	18.431	17.2156	16.9828	17.8215	17.9697	16.798	17.4255	17.5888	15.7138	16.215	16.3201	16.2096	17.0668	15.9316	localizes to early distal nephron, encompassing thick ascending limbs and distal convoluted tubules (at protein level) (PubMed:29993276). Ubiquitous (PubMed:12036578). High expression in the skin (PubMed:28065471). {ECO:0000269|PubMed:12036578, ECO:0000269|PubMed:28065471, ECO:0000269|PubMed:29993276}.;TISSUE SPECIFICITY: Kidney	2.69748	0.0131356	1.16489	+	3.64418	P36543	24	V-type proton ATPase subunit E 1	ATP6V1E1
15.1473	15.4451	17.4958	16.7281	15.2335	16.4406	15.678	14.6755	14.6428	17.0227	15.5187	15.5618	15.1278	13.8875	14.6716	14.2937	14.9813	13.9745	15.6243	NA	2.0071	0.037115	1.14765	+	2.90594	Q16864-2	9	Isoform 2 of V-type proton ATPase subunit F	ATP6V1F
15.1742	16.2367	16.1195	13.6136	15.1145	18.0197	16.2228	15.3467	16.3976	15.7755	15.0536	15.9592	15.447	14.6647	14.9826	13.81	15.2766	15.7414	14.0289	localizes to early distal nephron, encompassing thick ascending limbs and distal convoluted tubules (at protein level) (PubMed:29993276). Ubiquitous (PubMed:12384298). {ECO:0000269|PubMed:12384298, ECO:0000269|PubMed:29993276}.;TISSUE SPECIFICITY: Kidney	1.20996	0.130715	0.902653		2.00062	O75348	13	V-type proton ATPase subunit G 1	ATP6V1G1
14.739	14.495	16.8809	16.473	15.7731	17.2774	14.4347	14.8505	16.2208	15.1571	14.7661	15.0763	15.2456	13.4888	14.0282	14.2268	14.5667	15.2063	15.0701	TISSUE SPECIFICITY: Widely expressed. {ECO:0000269|PubMed:9620685}.	1.45917	0.0878072	0.96448	+	2.29488	Q9UI12;Q9UI12-2	15	V-type proton ATPase subunit H;Isoform 2 of V-type proton ATPase subunit H	ATP6V1H
11.9028	13.4395	14.0471	13.344	11.1734	11.7896	12.6288	13.0281	13.341	13.6215	13.0903	11.7683	12.3779	11.3192	12.3819	12.0887	12.3272	11.7314	11.5764	TISSUE SPECIFICITY: [Isoform 3]: Expressed in cerebellum and brain cortex. {ECO:0000269|PubMed:9693104}.;TISSUE SPECIFICITY: Widely expressed including in heart, brain, lung, muscle, kidney, pancreas, and to a lesser extent placenta (PubMed:8490646, PubMed:8490659). Expressed in fibroblasts, aortic smooth muscle cells, aortic endothelial cells and umbilical vein endothelial cells (at protein leve…	1.35219	0.103656	0.792736	+	2.17027	Q04656;Q04656-2;Q04656-3;Q04656-5	5	Copper-transporting ATPase 1;Isoform 1 of Copper-transporting ATPase 1;Isoform 2 of Copper-transporting ATPase 1;Isoform 5 of Copper-transporting ATPase 1	ATP7A
14.3687	15.0672	13.0308	16.3211	12.906	13.8497	14.8178	15.0245	15.7322	14.7361	15.3321	12.2244	14.1021	12.2396	13.4146	13.7787	12.7404	14.5136	14.2768	TISSUE SPECIFICITY: Found in most adult tissues except liver, testis and placenta. Most abundant in heart, brain and skeletal muscle. Also detected in fetal tissues. Isoform 1 is only detected in brain, skeletal muscle and heart and is the most abundant form in skeletal muscle. Highly expressed in platelets (PubMed:30674456). {ECO:0000269|PubMed:30674456}.	0.934674	0.211033	0.870056		1.65517	Q9Y2Q0-3	16	Isoform 3 of Phospholipid-transporting ATPase IA	ATP8A1
15.3852	14.9637	14.871	16.2301	15.2591	16.4828	16.6846	16.532	17.0972	16.1072	16.7105	14.0801	11.5321	13.7952	15.0979	15.3513	14.1775	14.1576	14.5591	TISSUE SPECIFICITY: Found in most tissues except brain and skeletal muscle. Most abundant in pancreas and small intestine.	2.58503	0.0154926	1.77114	+	3.52487	O43520	33	Phospholipid-transporting ATPase IC	ATP8B1
15.3603	16.2636	15.1846	15.4324	15.3615	19.2098	15.4457	13.9224	15.9756	15.295	14.9626	14.2704	10.4096	14.6164	13.98	14.4907	14.9017	14.5719	15.6484	NA	1.30324	0.112116	1.4686	+	2.11244	O75110	12	Probable phospholipid-transporting ATPase IIA	ATP9A
15.3677	15.681	12.6088	14.6755	14.7964	18.6766	15.6392	15.5276	12.1186	14.4836	15.7833	14.7439	10.6635	14.2886	14.4583	14.9314	12.7122	12.2978	14.8036	NA;TISSUE SPECIFICITY: Weakly expressed in muscle. {ECO:0000269|PubMed:12965202}.	1.21481	0.129875	1.55773		2.00649	I3L448;Q5TC12	5	ATP synthase mitochondrial F1 complex assembly factor 1	ATPAF1
15.261	13.2519	16.7738	17.0314	14.1671	16.7482	13.8682	15.1135	13.7416	15.9931	15.5029	12.8318	14.1311	14.1199	13.7423	13.9949	13.6946	12.913	13.8601	TISSUE SPECIFICITY: Widely expressed. {ECO:0000269|PubMed:11410595}.	1.37881	0.0995453	1.24429	+	2.2015	Q8N5M1	5	ATP synthase mitochondrial F1 complex assembly factor 2	ATPAF2
13.5017	12.8931	15.2229	14.9014	14.2992	15.6196	13.0889	13.6499	13.6313	14.0103	13.6281	13.4246	11.8742	13.0216	12.6779	12.9609	12.3824	12.804	12.5991	TISSUE SPECIFICITY: Ubiquitous.	3.00441	0.00855148	1.37211	+	3.96981	P46100;P46100-4	26	Transcriptional regulator ATRX;Isoform 3 of Transcriptional regulator ATRX	ATRX
14.6086	14.2814	15.7894	15.7758	16.3963	14.4938	12.9842	15.2606	13.6124	15.5183	14.6862	12.7853	13.6708	11.7759	13.1161	13.2196	13.0136	12.3853	13.271	TISSUE SPECIFICITY: Expressed in the central nervous system. {ECO:0000269|PubMed:15201271}.	2.79016	0.0117027	1.76092	+	3.74247	Q9UBB4;Q9UBB4-2	8	Ataxin-10;Isoform 2 of Ataxin-10	ATXN10
13.7492	14.123	13.5288	14.1911	13.2934	15.4222	13.6421	13.3038	13.8249	14.4993	12.8559	13.7504	14.5464	13.938	14.0455	13.8708	13.4747	12.8821	12.8224	NA;TISSUE SPECIFICITY: Expressed in the brain, heart, liver, skeletal muscle, pancreas and placenta. Isoform 1 is predominant in the brain and spinal cord. Isoform 4 is more abundant in the cerebellum. In the brain, broadly expressed in the amygdala, caudate nucleus, corpus callosum, hippocampus, hypothalamus, substantia nigra, subthalamic nucleus and thalamus. {ECO:0000269|PubMed:8896555, ECO:00…	0.267963	0.649542	0.194389		0.626114	A0A2R8Y5A6;A0A2R8Y7E6;A0A2R8Y7P6;A0A2R8YDM9;A0A5F9ZHH4;A0A5F9ZHW5;A0A5F9ZHX3;A0A5F9ZI57;F8VQP2;F8WB06;H0YH87;Q99700;Q99700-2;Q99700-4;V9GY86	11	Ataxin-2;Ataxin-2;Ataxin-2;Ataxin-2;Ataxin-2;Ataxin-2;Ataxin-2;Ataxin-2;Ataxin-2;Ataxin-2;Ataxin-2;Ataxin-2;Isoform 2 of Ataxin-2;Isoform 4 of Ataxin-2;Ataxin-2	ATXN2
16.1442	16.4613	17.443	16.9409	16.2578	17.5687	15.7545	15.621	15.9541	16.7895	15.2545	15.6592	14.5477	16.2514	16.0606	15.9233	16.1676	15.3009	15.5026	TISSUE SPECIFICITY: Expressed at high levels in thymus, lymph node, spleen, fetal kidney and adult testis. Constitutively associated with MPL and EPOR in hematopoietic cells. {ECO:0000269|PubMed:11784712}.	1.16003	0.142556	0.641551		1.93982	Q8WWM7	39	Ataxin-2-like protein	ATXN2L
15.4076	15.1705	16.6668	15.2144	15.9138	16.4379	14.9254	15.1113	14.3531	15.6874	15.058	14.9206	15.2598	13.1687	13.8966	13.6622	15.7923	14.8192	15.0668	NA;TISSUE SPECIFICITY: Ubiquitous.	1.52807	0.0787964	0.88189	+	2.37398	A0A087WXY4;A0A087X1A8;A0A2R8Y3X7;D3VVH9;F5H211;G3V3R7;P54252;P54252-1;P54252-4	6	Ataxin-3;Ataxin-3;Ataxin-3;Ataxin 3 variant m;Ataxin-3;Ataxin-3 (Fragment);Ataxin-3;Isoform 1 of Ataxin-3;Isoform 4 of Ataxin-3	ATXN3
15.3214	15.6536	16.3862	13.3015	13.2854	12.2658	15.2281	15.5918	12.2083	13.2889	15.1857	14.669	11.6716	15.3615	15.885	15.655	15.3049	11.3955	15.8941	NA	0.0394875	0.938642	-0.0870401		-0.11078	Q96GX2	1	Ataxin-7-like protein 3B	ATXN7L3B
16.0263	15.7089	16.4716	17.1526	15.4417	17.2225	16.5373	16.1504	17.7383	17.7074	16.716	16.1014	16.4523	15.7688	15.5728	16.4863	14.9162	16.7395	15.5495	NA	1.14532	0.146062	0.654735		1.92176	Q13825;Q13825-2	14	Methylglutaconyl-CoA hydratase, mitochondrial;Isoform 2 of Methylglutaconyl-CoA hydratase, mitochondrial	AUH
16.3702	15.7025	16.9164	16.6578	16.7825	16.1369	15.5406	15.4073	15.5669	16.3717	15.9982	15.7725	14.8304	15.8258	15.1971	15.1747	14.3379	14.9078	14.9957	TISSUE SPECIFICITY: Detected in blood platelets and leukocytes (at protein level). Ubiquitous. Highly expressed in placenta, liver, kidney, skeletal muscle, heart and brain. {ECO:0000269|PubMed:12042322}.	3.51918	0.00424096	1.06348	+	4.51995	Q9Y679	14	Ancient ubiquitous protein 1	AUP1
14.1836	13.9208	14.8335	14.9491	13.0911	14.8711	13.0699	13.1212	12.809	14.058	11.3807	12.2703	10.2889	12.9972	12.647	12.3287	12.5892	11.592	9.84529	NA;TISSUE SPECIFICITY: High level expression seen in the thymus. It is also expressed in the spleen, lung, testis, colon, placenta and fetal liver. Expressed during S and G2/M phase and expression is up-regulated in cancer cells during M phase. {ECO:0000269|PubMed:9809983, ECO:0000269|PubMed:9858806}.	2.3251	0.0226821	1.79105	+	3.24818	J3KT86;J3QLN8;Q96GD4;Q96GD4-2;Q96GD4-4;Q96GD4-5	3	Aurora kinase B (Fragment);Aurora kinase B (Fragment);Aurora kinase B;Isoform 2 of Aurora kinase B;Isoform 4 of Aurora kinase B;Isoform 5 of Aurora kinase B	AURKB
12.9972	12.7437	13.4755	12.7176	13.0301	15.7789	12.9886	12.7606	12.6767	13.1755	12.2882	13.3002	13.1371	13.1322	13.146	13.0349	12.4771	15.4691	12.3372	TISSUE SPECIFICITY: Highly expressed in testis, ovary, thymus, prostate, spleen, small intestine, colon, heart, skeletal muscle, liver, kidney and pancreas.	0.0712684	0.892177	-0.0865969		-0.193765	Q9NQS1	9	Cell death regulator Aven	AVEN
15.2839	15.5592	15.2709	16.1432	15.8156	16.6119	15.6287	15.3639	16.0606	15.8573	15.2285	13.4448	14.5158	15.7259	14.9978	15.4599	15.3348	15.4125	14.8498	NA	0.514761	0.426833	0.33716		1.05619	Q8NBF6	18	Late secretory pathway protein AVL9 homolog	AVL9
10.9527	12.2228	12.6349	14.0437	12.039	11.2959	10.6473	12.5182	12.6394	13.3157	11.3903	11.6005	10.969	13.1525	13.0274	10.5538	12.9931	10.5403	10.5477	TISSUE SPECIFICITY: Ubiquitously expressed.	0.364897	0.550302	0.424956		0.805558	O15169;O15169-2	2	Axin-1;Isoform 2 of Axin-1	AXIN1
13.3934	13.9516	15.5501	15.8428	15.4235	14.9574	14.2624	11.9595	13.5166	16.0106	12.6572	13.5681	14.7479	12.9501	13.9556	15.5992	11.0839	14.3747	16.6248	TISSUE SPECIFICITY: Blood plasma, seminal plasma, urine, saliva, sweat, epithelial cells of various human glands, liver.	0.0331775	0.948036	0.0668921		0.0936895	P25311	11	Zinc-alpha-2-glycoprotein	AZGP1
18.3057	16.8454	17.972	16.9878	18.5221	20.6961	18.6604	17.6371	18.4614	19.699	18.5685	17.8291	17.3491	16.9732	17.3896	16.6017	16.4984	17.5433	16.4892	NA	2.28047	0.0240337	1.37094	+	3.20046	H0YLF3	9	Beta-2-microglobulin (Fragment)	B2M
13.2071	15.959	13.679	13.5778	12.9543	15.2358	14.9333	11.2058	14.3543	16.0883	13.8639	12.2705	12.5898	12.0069	12.3386	12.9328	9.679	11.5117	10.0929	NA;TISSUE SPECIFICITY: Expressed in stomach, jejunum, colon, pancreas, small intestine, testis and gastrointestinal and pancreatic cancer cell lines. Hardly detected in lung, liver, adrenal gland and peripheral blood leukocytes. {ECO:0000269|PubMed:10406968}.	2.60977	0.0150348	2.351	+	3.55113	A0A0A0MS93;Q9Y2C3	10	Hexosyltransferase;Beta-1,3-galactosyltransferase 5	B3GALT5
13.7861	15.3943	16.0871	13.9414	14.9246	15.6414	14.645	14.4296	14.6943	12.2335	14.6242	14.6767	14.1249	14.3669	14.2842	13.9839	13.7652	14.7164	13.8085	TISSUE SPECIFICITY: Widely expressed, with highest levels in testis and uterus. {ECO:0000269|PubMed:12943678, ECO:0000269|PubMed:16899492}.	0.559907	0.396368	0.439857		1.1268	Q6Y288	4	Beta-1,3-glucosyltransferase	B3GLCT
12.7603	13.1306	12.6393	13.2938	13.0896	12.5033	11.8437	12.1289	13.9087	13.2574	11.6062	11.7589	11.8499	10.2071	10.856	8.59865	11.4165	11.0338	11.377	TISSUE SPECIFICITY: Ubiquitous. {ECO:0000269|PubMed:11042166}.	3.60946	0.0035541	1.89736	+	4.61741	Q9NY97;Q9NY97-2	3	N-acetyllactosaminide beta-1,3-N-acetylglucosaminyltransferase 2;Isoform 2 of N-acetyllactosaminide beta-1,3-N-acetylglucosaminyltransferase 2	B3GNT2
13.2702	13.8263	12.7024	13.9748	15.6009	11.7676	14.1831	13.5824	12.1039	15.2301	14.3801	10.9203	10.4237	11.2352	9.82386	9.99578	11.4199	11.2768	11.0059	TISSUE SPECIFICITY: Expressed in colon, jejunum, stomach, esophagus, placenta and trachea. {ECO:0000269|PubMed:11042166}.	3.80902	0.00264567	2.72169	+	4.83423	Q9Y2A9	5	N-acetyllactosaminide beta-1,3-N-acetylglucosaminyltransferase 3	B3GNT3
13.3473	11.8999	11.8465	14.647	13.2742	15.355	13.5593	12.9115	15.2075	15.8829	13.6343	11.1894	11.5062	11.3734	10.6795	10.372	10.7854	11.084	10.9104	TISSUE SPECIFICITY: Highly expressed in testis, colon and stomach. Weakly expressed in other tissues. {ECO:0000269|PubMed:12966086}.	3.4883	0.00449412	2.6042	+	4.4867	Q6L9W6	3	Beta-1,4-N-acetylgalactosaminyltransferase 3	B4GALNT3
14.1742	15.7173	16.953	13.1644	15.4752	16.6507	15.4599	15.3269	15.7356	15.6027	14.2764	15.6525	14.4923	14.9138	14.7128	14.3975	15.1204	15.8352	14.3574	TISSUE SPECIFICITY: Ubiquitously expressed, but at very low levels in fetal and adult brain.	0.614736	0.360481	0.516272		1.21007	P15291;P15291-2	7	Beta-1,4-galactosyltransferase 1;Isoform Short of Beta-1,4-galactosyltransferase 1	B4GALT1
12.0417	13.4874	19.9657	21.0078	14.4561	12.6187	15.0281	14.0595	15.2922	20.9908	15.0488	11.0042	10.9167	10.9279	14.8341	11.1523	13.4159	12.1969	11.2558	lower in brain, colon, lung, muscle, ovary, testis and uterus.;TISSUE SPECIFICITY: High expression in heart, placenta, kidney and pancreas	1.56157	0.0746795	3.31681	+	2.41215	O60513	10	Beta-1,4-galactosyltransferase 4	B4GALT4
14.8372	15.2493	17.2676	16.33	15.0547	16.1857	14.9726	15.0235	14.1504	16.3137	15.7428	14.7916	14.1109	13.8844	13.3969	13.444	14.4842	14.7746	12.958	NA	3.2697	0.00581481	1.62853	+	4.25234	Q9NWV8	10	BRISC and BRCA1-A complex member 1	BABAM1
15.5196	15.8113	16.1637	16.1952	14.9001	18.4877	15.4609	15.2395	15.935	12.4218	14.5555	15.1703	15.8004	15.4444	14.9835	15.3389	15.1451	15.8218	14.6526	TISSUE SPECIFICITY: Expressed in all cell lines examined. Highly expressed in placenta. {ECO:0000269|PubMed:11676476}.	0.125142	0.818879	0.175978		0.324323	Q9NXR7;Q9NXR7-1;Q9NXR7-3;Q9NXR7-4	7	BRISC and BRCA1-A complex member 2;Isoform 1 of BRISC and BRCA1-A complex member 2;Isoform 3 of BRISC and BRCA1-A complex member 2;Isoform 4 of BRISC and BRCA1-A complex member 2	BABAM2
12.7728	12.3838	15.2436	16.9628	13.8371	11.723	11.5029	12.438	11.6905	15.4533	13.3603	11.2658	10.2567	10.2878	10.7446	10.561	10.6907	10.0066	11.4297	TISSUE SPECIFICITY: Expressed in a wide variety of tissues.	2.79447	0.0116456	2.65133	+	3.74704	Q92934	5	Bcl2-associated agonist of cell death	BAD
16.1069	15.0013	13.9667	16.6794	14.8714	14.8297	15.4881	14.7048	16.2228	15.935	14.8944	14.8325	14.648	14.6271	14.9232	13.9827	15.6184	16.0793	14.9557	NA;TISSUE SPECIFICITY: Isoform 4 is the most abundantly expressed isoform. It is ubiquitously expressed throughout most tissues, except the liver, colon, breast and uterine myometrium. Isoform 1 is expressed in the ovary and testis. Isoform 4 is expressed in several types of tumor cell lines, and at consistently high levels in leukemia and lymphoma cell lines. Isoform 1 is expressed in the prosta…	0.410745	0.508985	0.318053		0.885237	J3QTA2;Q99933;Q99933-3;Q99933-4	5	BAG family molecular chaperone regulator 1;BAG family molecular chaperone regulator 1;Isoform 3 of BAG family molecular chaperone regulator 1;Isoform 4 of BAG family molecular chaperone regulator 1	BAG1
16.4138	14.7025	17.2648	17.6572	15.6169	16.4421	14.5895	14.8659	14.967	16.4057	15.5471	15.2746	15.1463	13.4001	14.8866	16.0154	12.8083	13.0329	16.2756	NA	1.48558	0.0843787	1.30296	+	2.3253	O95816	21	BAG family molecular chaperone regulator 2	BAG2
13.9905	13.8344	15.5704	15.802	13.904	16.6921	13.9605	13.692	14.4869	14.8481	14.1732	13.916	14.4537	13.2658	13.7614	14.0428	13.6305	14.0051	15.052	NA	0.708005	0.308523	0.542306		1.34631	O95817	22	BAG family molecular chaperone regulator 3	BAG3
14.204	14.7706	15.4401	15.685	14.2511	14.4271	14.1638	14.0686	14.5804	15.6946	14.0272	13.9497	13.1381	12.3135	13.3263	13.4934	12.8894	12.5321	13.3124	NA	4.64515	0.000714286	1.60446	+	5.77003	Q9UL15;Q9UL15-2	13	BAG family molecular chaperone regulator 5;Isoform 2 of BAG family molecular chaperone regulator 5	BAG5
14.1158	13.8072	15.2463	14.9757	14.8051	15.5879	13.5508	13.8416	14.0581	14.5859	13.6915	12.9762	13.4667	13.944	13.5145	13.816	13.8011	13.7731	13.2319	NA;TISSUE SPECIFICITY: Expressed by immature dendritic cells (at protein level). {ECO:0000269|PubMed:18852879}.	1.24375	0.12405	0.620559		2.04139	A0A024RCR6;A0A0G2JK23;P46379;P46379-2;P46379-3	29	BAG6;Large proline-rich protein BAG6;Large proline-rich protein BAG6;Isoform 2 of Large proline-rich protein BAG6;Isoform 3 of Large proline-rich protein BAG6	BAG6
15.6461	16.0194	16.9655	16.5976	15.154	16.7134	15.249	14.8326	15.2941	16.0328	14.5482	14.5713	15.6183	15.4977	13.4022	15.1802	14.7184	14.8057	12.53	TISSUE SPECIFICITY: Isoform 1 and isoform 4 are expressed almost exclusively in brain. Isoform 4 is barely detectable in placenta, prostate and testis. A short isoform is ubiquitous, with the highest expression in liver, prostate, testis and placenta. {ECO:0000269|PubMed:10332026, ECO:0000269|PubMed:10343108, ECO:0000269|PubMed:11157984}.	1.56589	0.0740165	1.09927	+	2.41706	Q9UQB8-5	15	Isoform 5 of Brain-specific angiogenesis inhibitor 1-associated protein 2	BAIAP2
14.6358	15.616	15.5566	15.456	15.0703	18.1745	14.5419	14.4993	15.3482	16.4742	13.5784	13.7369	13.2656	14.7714	13.9651	14.5893	15.3135	15.6594	12.6556	NA	0.897714	0.224486	0.906855		1.60659	Q9UHR4	27	Brain-specific angiogenesis inhibitor 1-associated protein 2-like protein 1	BAIAP2L1
15.6458	15.3926	17.1718	18.6645	16.0711	15.8158	15.029	15.5949	15.7012	13.9736	15.5909	11.2269	15.5745	12.8499	10.719	11.2259	11.0435	14.9618	10.9017	NA;TISSUE SPECIFICITY: Expressed in a wide variety of tissues, with highest levels in the heart and skeletal muscle.	2.47109	0.0185153	3.02178	+	3.40379	A0A0A0MRG8;Q16611;Q16611-2	3	Bcl-2 homologous antagonist/killer;Bcl-2 homologous antagonist/killer;Isoform 2 of Bcl-2 homologous antagonist/killer	BAK1
17.2857	16.0119	15.7076	19.6456	16.9204	17.174	16.6725	17.105	16.3106	20.6822	17.0646	17.5233	16.4659	15.325	15.7414	15.6914	15.1741	16.0701	16.3014	TISSUE SPECIFICITY: Widely expressed. Expressed in colon, brain, heart, kidney, liver, lung, ovary, pancreas, placenta, prostate, skeletal muscle, small intestine, spleen and testis. Not detected in thymus and peripheral blood leukocytes.	1.79663	0.0516293	1.51777	+	2.67544	O75531	27	Barrier-to-autointegration factor	BANF1
12.0605	13.0067	12.5713	13.0647	13.8582	14.2029	12.7922	12.6556	12.9547	12.478	12.715	13.5136	9.94539	13.8111	13.6148	13.1343	14.0683	14.3873	14.1695	NA	0.275103	0.641787	-0.314933		-0.639914	Q8IXM2-2	1	Isoform 2 of Chromatin complexes subunit BAP18	BAP18
14.5455	14.5795	15.9237	14.6148	13.4504	13.9758	14.418	13.2582	14.3241	15.8509	14.2901	14.7578	14.9638	11.5038	13.1898	12.9569	12.5905	14.5337	13.6643	TISSUE SPECIFICITY: Brain.	1.70112	0.0601773	1.15583	+	2.56934	P80723	37	Brain acid soluble protein 1	BASP1
16.2933	14.2419	17.5804	16.9716	16.9663	17.2456	14.7298	16.3	15.967	17.7735	15.165	14.8366	14.5473	13.6881	14.9758	14.71	14.4822	13.4991	14.5545	TISSUE SPECIFICITY: Expressed in a wide variety of tissues. Isoform Psi is found in glial tumors. Isoform Alpha is expressed in spleen, breast, ovary, testis, colon and brain, and at low levels in skin and lung. Isoform Sigma is expressed in spleen, breast, ovary, testis, lung, colon, brain and at low levels in skin. Isoform Alpha and isoform Sigma are expressed in pro-myelocytic leukemia, histio…	2.82818	0.0110087	1.82157	+	3.78279	Q07812;Q07812-2;Q07812-5;Q07812-8	13	Apoptosis regulator BAX;Isoform Beta of Apoptosis regulator BAX;Isoform Epsilon of Apoptosis regulator BAX;Isoform Sigma of Apoptosis regulator BAX	BAX
19.1124	22.7596	19.8463	20.1655	20.9691	25.6357	20.8777	20.2807	18.3016	18.8975	17.8677	17.647	19.8114	19.896	18.0701	18.2901	20.4693	19.5281	18.3648	TISSUE SPECIFICITY: Highly expressed in testis and at low or undetectable levels in other tissues analyzed.	0.543102	0.407363	0.992486		1.10074	Q9NRL2;Q9NRL2-2	7	Bromodomain adjacent to zinc finger domain protein 1A;Isoform 2 of Bromodomain adjacent to zinc finger domain protein 1A	BAZ1A
13.8986	14.4974	15.2312	16.8177	14.5753	16.4213	14.2454	13.9498	12.2042	15.5443	13.7624	14.4328	14.5936	13.5739	13.5269	13.1741	12.6225	14.3786	14.1647	TISSUE SPECIFICITY: Ubiquitously expressed with high levels of expression in heart, brain, placenta, skeletal muscle and ovary.	1.02332	0.181056	0.912494		1.76934	Q9UIG0;Q9UIG0-2	22	Tyrosine-protein kinase BAZ1B;Isoform 2 of Tyrosine-protein kinase BAZ1B	BAZ1B
14.449	14.9252	15.231	14.3655	14.4229	17.4228	14.0948	14.3109	15.0309	13.1829	13.7346	14.5277	14.5759	14.5931	13.4987	13.6655	13.8327	14.8823	14.6331	NA;TISSUE SPECIFICITY: Expressed at moderate levels in most tissues analyzed, including heart, brain, placenta, lung, skeletal muscle, kidney and pancreas.	0.443282	0.483295	0.401328		0.940078	F8VU39;J3KPG5;Q9UIF9;Q9UIF9-2;Q9UIF9-3	8	Bromodomain adjacent to zinc finger domain protein 2A;Bromodomain adjacent to zinc finger domain protein 2A;Bromodomain adjacent to zinc finger domain protein 2A;Isoform 1 of Bromodomain adjacent to zinc finger domain protein 2A;Isoform 3 of Bromodomain adjacent to zinc finger domain protein 2A	BAZ2A
18.2563	17.4742	21.1092	17.9638	17.6098	20.7392	16.4243	18.3772	16.5371	13.0364	17.9216	12.2447	17.246	18.8102	18.4731	18.0131	18.0689	18.1645	16.3731	NA;TISSUE SPECIFICITY: Widely expressed. Expressed in adult heart, skeletal muscle, lung, liver, kidney, placenta and brain, and in fetal kidney, lung, liver and brain. {ECO:0000269|PubMed:10221542, ECO:0000269|PubMed:16380913}.	0.2337	0.686266	-0.570588		-0.558406	A0A5F9ZGX9;A0A5F9ZGY2;A0A5F9ZH14;A0A5F9ZH37;A0A5F9ZH74;A0A5F9ZHE7;A0A5F9ZHP5;F8WCG5;Q3SYG4;Q3SYG4-2;Q3SYG4-3;Q3SYG4-4;Q3SYG4-5;Q3SYG4-6;Q3SYG4-7	1	Protein PTHB1;Protein PTHB1;Protein PTHB1;Protein PTHB1;Protein PTHB1;Protein PTHB1;Protein PTHB1 (Fragment);Protein PTHB1;Protein PTHB1;Isoform 2 of Protein PTHB1;Isoform 3 of Protein PTHB1;Isoform 4 of Protein PTHB1;Isoform 5 of Protein PTHB1;Isoform 6 of Protein PTHB1;Isoform 7 of Protein PTHB1	BBS9
12.8989	13.1639	16.242	14.0058	12.024	14.7323	13.8968	13.2347	14.0046	14.0113	13.9846	13.4191	16.0128	12.5126	12.6732	12.9485	13.2125	13.5793	14.1725	TISSUE SPECIFICITY: Wide tissue distribution (highest in the pancreas and very low in brain). Closely associated with the basal layer of cells in epithelia and the endothelium of blood vessel walls.	0.162636	0.773067	0.214153		0.409003	P50895	12	Basal cell adhesion molecule	BCAM
18.0605	18.089	19.2426	19.1114	17.9568	20.0323	17.448	18.3369	17.8207	18.508	18.4652	17.9975	17.6122	17.4551	16.7523	17.8638	16.9236	17.2939	17.541	TISSUE SPECIFICITY: Ubiquitous. Highly expressed in neurons and discrete endocrine cells. {ECO:0000269|PubMed:11561007}.	2.66982	0.0138119	1.07356	+	3.61485	P51572;P51572-2	40	B-cell receptor-associated protein 31;Isoform 2 of B-cell receptor-associated protein 31	BCAP31
14.5213	15.4061	15.7736	15.2513	14.3596	17.7846	15.5996	14.1628	15.0072	15.1007	14.7864	14.6761	11.6319	14.497	14.2198	13.3511	13.9817	14.7077	13.4822	TISSUE SPECIFICITY: Widely expressed with an abundant expression in the testis. Low level of expression seen in the liver, thymus, and peripheral blood leukocytes. The protein has been detected in a B-cell line.	2.30391	0.0233617	1.50653	+	3.22553	P56945;P56945-2;P56945-3;P56945-5;P56945-6;P56945-7;P56945-8	10	Breast cancer anti-estrogen resistance protein 1;Isoform 2 of Breast cancer anti-estrogen resistance protein 1;Isoform 3 of Breast cancer anti-estrogen resistance protein 1;Isoform 5 of Breast cancer anti-estrogen resistance protein 1;Isoform 6 of Breast cancer anti-estrogen resistance protein 1;Isoform 7 of Breast cancer anti-estrogen resistance protein 1;Isoform 8 of Breast cancer anti-estrogen…	BCAR1
14.2191	14.8636	15.0343	15.0582	14.7717	16.776	14.7322	14.5017	15.0322	14.8293	14.3515	15.3607	14.266	14.8809	14.8352	14.7161	14.9173	15.2605	13.9636	TISSUE SPECIFICITY: Ubiquitously expressed. {ECO:0000269|PubMed:10403562}.	0.458218	0.470716	0.269506		0.964815	O75934	18	Pre-mRNA-splicing factor SPF27	BCAS2
16.1569	17.389	17.1193	17.6287	16.1558	16.1238	16.7774	16.8514	16.9794	17.4004	16.8968	15.9439	16.7751	15.078	15.3086	15.2228	14.9504	14.633	15.7203	TISSUE SPECIFICITY: Ubiquitous.	3.7511	0.00284644	1.40121	+	4.77108	O15382	29	Branched-chain-amino-acid aminotransferase, mitochondrial	BCAT2
15.7724	15.0402	15.1546	16.0115	15.5803	16.9508	14.9953	14.9958	15.6724	15.5642	14.7805	15.0326	14.437	16.15	15.0206	14.4408	14.9702	15.2072	14.8822	TISSUE SPECIFICITY: Expressed at high levels in testis and skeletal muscle and at lower levels in brain, heart, kidney, liver, lung, ovary, pancreas, placenta, and spleen. {ECO:0000269|PubMed:10878006, ECO:0000269|PubMed:11313963}.	0.874722	0.233202	0.447103		1.57606	Q9P287	13	BRCA2 and CDKN1A-interacting protein	BCCIP
13.0625	11.9477	12.7953	13.0561	12.3827	13.1825	14.7964	11.5652	14.7974	11.8698	13.173	11.4679	14.9133	11.0694	14.5491	15.2593	13.8948	16.6926	16.8	NA;TISSUE SPECIFICITY: Detected in blood plasma (at protein level). Present in most cells except erythrocytes. {ECO:0000269|PubMed:19368529, ECO:0000269|PubMed:19542320}.	1.85726	0.0471901	-1.89843	+	-2.74227	F8WEX7;F8WF14;P06276	1	Carboxylic ester hydrolase;Carboxylic ester hydrolase;Cholinesterase	BCHE
14.8868	14.8257	15.6933	15.7483	14.0305	14.6151	14.2678	15.5802	14.6602	15.8103	15.1302	13.5594	14.0198	14.0792	13.9113	12.8498	13.8656	13.4785	12.855	NA	3.20452	0.00636052	1.32076	+	4.18277	F5H5P2;P12694	28	2-oxoisovalerate dehydrogenase subunit alpha;2-oxoisovalerate dehydrogenase subunit alpha, mitochondrial	BCKDHA
14.9188	16.9843	12.8776	16.8763	13.7988	15.9561	16.6658	16.4049	16.1911	18.0784	15.6394	15.921	16.5889	16.8059	15.1481	15.2741	16.432	16.0243	15.6393	NA	0.0827213	0.875292	-0.128152		-0.22251	P21953	8	2-oxoisovalerate dehydrogenase subunit beta, mitochondrial	BCKDHB
13.7799	12.6479	14.012	15.4145	13.2343	14.9311	12.8776	11.3805	12.4097	13.9372	12.1666	12.6526	11.3691	12.837	11.4688	13.358	12.2905	12.795	11.7216	TISSUE SPECIFICITY: Ubiquitous.	1.2583	0.121085	1.02413		2.05884	O14874	10	[3-methyl-2-oxobutanoate dehydrogenase [lipoamide]] kinase, mitochondrial	BCKDK
11.998	15.3435	15.7296	13.6379	14.1578	17.1208	14.5664	14.7317	14.5451	14.2639	14.5348	14.3039	14.7057	14.2344	14.4251	14.106	14.9701	14.2309	13.8391	NA;TISSUE SPECIFICITY: Ubiquitous. {ECO:0000269|PubMed:9989495}.	0.185421	0.744418	0.219011		0.458362	A0A087WWW9;O95999	6	B-cell lymphoma/leukemia 10	BCL10
16.6822	14.8392	13.1981	16.7284	14.8013	15.2838	14.0934	15.9253	11.2197	14.7217	17.4651	10.4094	10.8751	13.6392	10.8456	11.8995	11.2618	9.24531	11.254	NA;TISSUE SPECIFICITY: Bcl-X(S) is expressed at high levels in cells that undergo a high rate of turnover, such as developing lymphocytes. In contrast, Bcl-X(L) is found in tissues containing long-lived postmitotic cells, such as adult brain.	2.73998	0.0123694	3.32532	+	3.68925	Q07817;Q07817-3;Q5QP56;Q5TE64;Q9H1R6	3	Bcl-2-like protein 1;Isoform Bcl-X(beta) of Bcl-2-like protein 1;Bcl-2-like protein 1 (Fragment);Bcl-2-like protein 1 (Fragment);Bcl-2-like protein 1 (Fragment)	BCL2L1
16.4429	15.5539	16.3898	17.6274	15.2753	15.7393	15.0561	15.8078	12.6284	16.7158	15.5105	13.9819	15.5819	13.7712	14.3748	13.4268	11.0155	11.4562	13.9471	TISSUE SPECIFICITY: Ubiquitous, with the highest levels of expression in heart, placenta and pancreas.	2.32792	0.0225895	2.19311	+	3.25119	Q9BXK5	10	Bcl-2-like protein 13	BCL2L13
12.1615	15.7299	12.8253	13.7871	13.6795	16.7319	14.3101	12.4689	14.6671	13.0241	13.2875	12.0274	11.3446	12.5549	13.6107	13.5853	13.8154	10.4254	2.22839	NA;TISSUE SPECIFICITY: Isoform 1 is widely expressed. Isoform 2 is testis-specific. {ECO:0000269|PubMed:11054413}.	1.25901	0.120938	2.64435		2.0597	K7EMX4;Q9BZR8	9	Apoptosis facilitator Bcl-2-like protein 14	BCL2L14
11.6824	15.1471	13.7211	14.2618	14.8155	12.6714	16.5458	16.7226	12.6873	13.7785	14.7265	12.1397	11.8572	13.7186	15.0398	14.1711	13.3375	10.4579	15.829	NA	0.321306	0.592839	0.587644		0.726876	Q5TBC7	3	Bcl-2-like protein 15	BCL2L15
16.1195	15.7658	16.5634	16.8326	15.2049	17.6726	18.0213	16.8463	12.8384	11.9777	16.0164	14.8388	14.8165	14.0531	14.9384	14.6829	15.1197	11.0673	15.4082	NA	1.0193	0.182438	1.4268		1.76422	Q4VC05;Q4VC05-2	4	B-cell CLL/lymphoma 7 protein family member A;Isoform 2 of B-cell CLL/lymphoma 7 protein family member A	BCL7A
15.1091	12.8494	16.7779	16.7603	15.1891	11.6543	13.7618	13.9964	13.1502	16.3996	14.8305	13.2559	10.3344	14.9336	13.5184	13.7903	13.3887	11.2437	10.3534	NA;TISSUE SPECIFICITY: Ubiquitous. {ECO:0000269|PubMed:9931421}.	1.56031	0.0747355	1.96895	+	2.41072	I3L1Q2;Q8WUZ0;Q8WUZ0-2	3	B-cell CLL/lymphoma 7 protein family member C (Fragment);B-cell CLL/lymphoma 7 protein family member C;Isoform 2 of B-cell CLL/lymphoma 7 protein family member C	BCL7C
18.3778	17.9655	18.325	17.6396	18.0895	19.4308	18.1319	17.8405	17.8494	18.382	17.7795	17.945	17.3952	18.2843	18.3235	18.7692	16.8492	19.0487	17.2857	TISSUE SPECIFICITY: Detected at low levels in thymus, prostate, testis, ovary and small intestine, and at lower levels in spleen, colon and blood.	0.214096	0.708908	0.152685		0.518478	O00512	3	B-cell CLL/lymphoma 9 protein	BCL9
14.5426	13.3548	15.5985	15.7559	14.8362	16.4759	14.1717	14.6603	13.8442	14.9665	13.7309	13.7793	13.4905	14.8365	14.3234	14.4316	14.5269	13.8456	14.3253	TISSUE SPECIFICITY: Ubiquitous.	0.490791	0.444996	0.388801		1.01788	Q9NYF8;Q9NYF8-2	40	Bcl-2-associated transcription factor 1;Isoform 2 of Bcl-2-associated transcription factor 1	BCLAF1
11.488	13.1647	13.2333	13.7848	13.3427	13.9315	12.4643	10.465	12.4876	12.9619	11.9968	9.67377	11.1111	12.2966	10.395	11.7081	10.4491	11.1031	9.91994	NA	1.69831	0.0604733	1.41861	+	2.56619	P11274;P11274-2	5	Breakpoint cluster region protein;Isoform 2 of Breakpoint cluster region protein	BCR
14.9312	15.2427	15.4638	17.3527	14.3292	13.7816	14.1558	15.5636	14.8989	17.107	15.9308	15.0101	11.4344	12.4823	12.6372	13.0138	8.75837	7.98294	13.0635	TISSUE SPECIFICITY: Ubiquitous. {ECO:0000269|PubMed:9878253}.	4.38647	0.00108571	3.97501	+	5.47507	Q9Y276	11	Mitochondrial chaperone BCS1	BCS1L
15.6971	16.8193	17.0605	19.0923	16.2664	18.6555	17.7985	17.3385	17.9864	18.3197	17.7612	15.7096	15.2026	17.4383	15.8762	16.6364	16.2669	15.8002	16.8757	NA	1.44348	0.0902539	1.07595	+	2.27674	Q02338	27	D-beta-hydroxybutyrate dehydrogenase, mitochondrial	BDH1
15.6033	15.2971	16.5963	13.4909	15.2788	18.224	15.9939	16.7604	16.5983	15.8699	16.976	15.6368	17.2653	14.3448	15.6658	15.8214	15.8411	15.9307	17.1446	TISSUE SPECIFICITY: Detected in liver (at protein level). {ECO:0000269|PubMed:22527885}.	0.016726	0.973255	0.025181		0.048072	Q9BUT1	9	3-hydroxybutyrate dehydrogenase type 2	BDH2
15.4797	14.7158	16.1574	16.0284	15.5486	16.0337	15.3657	15.1766	16.2075	16.4058	15.0365	15.2268	15.0632	14.1685	14.7367	14.7753	14.7156	14.3378	14.9826	TISSUE SPECIFICITY: Ubiquitous.	3.16108	0.00673554	0.932385	+	4.13646	Q14457	11	Beclin-1	BECN1
13.4199	11.1815	13.3663	14.5527	12.2587	11.6636	11.3336	11.9011	11.9068	12.633	9.76975	11.5442	9.99198	11.7037	11.2415	10.4753	9.51552	10.9577	12.0962	TISSUE SPECIFICITY: Expressed at least in heart, kidney, liver, ovary and spleen, with highest levels in spleen and lowest in heart. Expressed on the surface of T-cells. {ECO:0000269|PubMed:21914818, ECO:0000269|PubMed:25400923}.	1.50032	0.0827047	1.27304	+	2.34223	Q5T5X7	3	BEN domain-containing protein 3	BEND3
15.6553	15.7171	16.2226	16.87	15.1965	15.7311	16.11	14.4806	16.0729	17.4248	14.8147	10.3498	11.1877	15.5604	15.1117	14.9711	13.6678	10.7414	10.1026	NA	1.61811	0.0685607	2.33813	+	2.47617	Q9NYM9	3	BET1-like protein	BET1L
16.6626	13.6965	17.9368	19.1023	15.6781	16.0173	16.3033	14.6837	16.5024	17.1963	17.0758	16.7342	17.4944	14.7934	15.9113	16.105	15.9482	17.7843	18.2301	NA	0.0831145	0.875	-0.143744		-0.223487	C9JKG1	14	Biglycan (Fragment)	BGN
15.5442	15.331	14.8291	16.014	16.8675	14.8993	15.2748	15.8652	15.0602	13.7288	14.4405	11.8373	11.451	14.7311	13.2886	14.5411	14.2218	14.936	11.732	NA	1.40647	0.0955922	1.41693	+	2.23379	E5RH96	1	S-methylmethionine--homocysteine S-methyltransferase BHMT2 (Fragment)	BHMT2
11.913	11.8054	12.853	14.7541	13.1452	14.7027	12.9304	12.3576	12.0931	14.2489	13.9686	12.2649	11.6846	12.7148	13.2607	13.3046	15.2688	13.2624	16.8534	NA;TISSUE SPECIFICITY: Expressed in the brain, heart and skeletal muscle.	0.516788	0.425356	-0.677803		-1.0594	A8MVZ6;Q96G01;Q96G01-3;Q96G01-4	5	BICD1 protein;Protein bicaudal D homolog 1;Isoform 3 of Protein bicaudal D homolog 1;Isoform 4 of Protein bicaudal D homolog 1	BICD1
13.4454	12.0053	14.4436	14.685	12.8814	14.419	12.2295	11.2601	14.7632	13.615	12.2689	12.6409	13.3952	10.776	12.3172	10.992	10.307	11.6151	11.8142	TISSUE SPECIFICITY: Ubiquitous.	2.0981	0.0322401	1.61907	+	3.00448	Q8TD16;Q8TD16-2	7	Protein bicaudal D homolog 2;Isoform 2 of Protein bicaudal D homolog 2	BICD2
12.9167	14.1875	11.8394	12.7036	13.3696	17.0818	14.0016	12.4388	13.0754	14.2261	12.708	11.13	12.2454	13.2559	10.6428	13.2694	13.0228	11.4383	10.2868	NA	1.12722	0.150499	1.28348		1.89946	A0A2R8Y2X6;A1A5D9	11	BICD family-like cargo adapter 2	BICDL2
15.9534	13.5099	16.8796	16.4721	15.4468	15.9845	12.9381	15.0736	14.0146	16.3697	14.6543	11.4472	13.5357	13.7379	13.4054	13.8591	13.799	13.1813	13.2193	TISSUE SPECIFICITY: Isoform 2 and isoform 3 are expressed in spleen, bone marrow, cerebral and cerebellar cortex. Isoform 2 is expressed in spleen, pancreas and placenta (at protein level). Isoform 3 is expressed in lung, pancreas and spleen (at protein level). Isoform 4 is expressed in lung and pancreas (at protein level). {ECO:0000269|PubMed:14583606}.	1.33384	0.106942	1.36135	+	2.14866	P55957;P55957-2	16	BH3-interacting domain death agonist;Isoform 2 of BH3-interacting domain death agonist	BID
15.1599	14.5828	14.7623	15.338	14.9484	15.2221	15.1918	15.2898	15.5393	14.9817	15.3914	13.7762	14.6936	14.659	14.1961	13.8574	14.1111	14.3161	14.7976	TISSUE SPECIFICITY: Ubiquitous. Highest expression in the brain and muscle (PubMed:9182667). Expressed in oligodendrocytes (PubMed:27488240). Isoform IIA is expressed only in the brain, where it is detected in the gray matter, but not in the white matter (PubMed:27488240). Isoform BIN1 is widely expressed with highest expression in skeletal muscle. {ECO:0000269|PubMed:10903846, ECO:0000269|PubMed…	2.17861	0.0283659	0.639467	+	3.09122	O00499;O00499-2;O00499-6	20	Myc box-dependent-interacting protein 1;Isoform IIB of Myc box-dependent-interacting protein 1;Isoform II2 of Myc box-dependent-interacting protein 1	BIN1
14.4612	14.1686	14.6843	14.1978	13.19	15.0074	13.6976	13.7658	12.0985	15.1113	13.0177	13.6539	14.8889	12.0941	13.7061	11.6969	13.2628	12.8202	13.5082	TISSUE SPECIFICITY: Detected in natural killer cells (at protein level). Highest level expression seen in spleen and peripheral blood leukocytes and is also expressed at high levels in thymus, colon and placenta, suggesting preferential expression in hematopoietic tissues. {ECO:0000269|PubMed:10903846, ECO:0000269|PubMed:23285027}.	0.997181	0.189551	0.781603		1.736	A0A087X188;Q9UBW5;Q9UBW5-2	10	Bridging integrator 2;Bridging integrator 2;Isoform 2 of Bridging integrator 2	BIN2
15.4566	15.3712	15.3508	15.7518	14.7752	16.8537	15.3573	14.4051	14.1644	15.5327	13.692	13.5613	13.4757	14.0962	14.0138	14.0403	13.1296	13.2131	14.2491	TISSUE SPECIFICITY: Ubiquitously expressed except in brain. {ECO:0000269|PubMed:11274158}.	2.40557	0.0203183	1.27727	+	3.33404	Q9NQY0	6	Bridging integrator 3	BIN3
12.9761	12.8499	12.4145	13.2982	13.2832	12.4347	12.3177	13.077	12.3205	12.2937	13.2319	12.3737	10.4757	13.0362	13.5393	12.8614	12.6441	12.9502	12.6092	NA;TISSUE SPECIFICITY: Present in many fetal and adult tissues. Mainly expressed in adult skeletal muscle, thymus, testis, ovary, and pancreas, low or absent in brain and peripheral blood leukocytes.	0.192156	0.734845	0.151237		0.472676	E9PMH5;Q13490;Q13490-2	4	Baculoviral IAP repeat-containing protein 2;Baculoviral IAP repeat-containing protein 2;Isoform 2 of Baculoviral IAP repeat-containing protein 2	BIRC2
15.1216	15.7645	16.0357	15.867	15.0618	17.4411	14.6919	15.5371	12.6178	16.3643	14.8876	15.4522	14.6838	14.4217	14.3973	13.9919	15.2647	13.7464	15.2533	NA	1.08298	0.161915	0.866529		1.8445	Q13867	16	Bleomycin hydrolase	BLMH
16.1131	16.3056	16.5217	17.199	15.6181	16.4826	16.0595	15.6129	16.2313	17.2881	15.5455	15.1367	15.859	15.5079	15.3104	15.1419	15.2295	15.508	14.4785	NA	2.2828	0.0239831	0.885424	+	3.20296	G8JLQ3;P78537;P78537-2	5	Biogenesis of lysosome-related organelles complex 1 subunit 1;Biogenesis of lysosome-related organelles complex 1 subunit 1;Isoform 2 of Biogenesis of lysosome-related organelles complex 1 subunit 1	BLOC1S1
14.0257	14.1542	15.314	13.2047	15.1346	13.7599	14.493	14.8897	11.3501	16.4663	15.3544	12.9983	14.6114	13.5633	13.2994	13.9898	14.4038	10.337	10.6036	NA	1.04578	0.173693	1.28947		1.79779	Q9NUP1	5	Biogenesis of lysosome-related organelles complex 1 subunit 4	BLOC1S4
13.3844	13.0064	14.0645	15.0099	12.6472	12.919	13.5586	12.4839	13.9672	13.9691	12.5152	12.8443	12.2637	12.8716	12.777	13.0703	13.5356	12.6467	12.332	NA	1.05235	0.171844	0.578889		1.80607	Q8TDH9;Q8TDH9-3	5	Biogenesis of lysosome-related organelles complex 1 subunit 5;Isoform 3 of Biogenesis of lysosome-related organelles complex 1 subunit 5	BLOC1S5
16.0653	14.6586	15.0339	15.6184	13.4034	14.2308	14.6669	13.9491	15.6678	12.309	14.0575	13.7508	14.4572	14.9945	14.3275	13.8144	15.4028	13.0224	11.3738	NA;TISSUE SPECIFICITY: Widely expressed. {ECO:0000269|PubMed:12019270, ECO:0000269|PubMed:12191018}.	0.454827	0.473279	0.537713		0.959222	H3BN13;H3BPR6;H3BST1;Q9UL45;Q9UL45-2	2	Biogenesis of lysosome-related organelles complex 1 subunit 6;Biogenesis of lysosome-related organelles complex 1 subunit 6 (Fragment);Biogenesis of lysosome-related organelles complex 1 subunit 6;Biogenesis of lysosome-related organelles complex 1 subunit 6;Isoform 2 of Biogenesis of lysosome-related organelles complex 1 subunit 6	BLOC1S6
16.0796	16.7912	17.0456	18.0464	16.7724	17.8593	16.1496	16.8842	16.6424	16.2181	16.417	16.592	18.0603	16.0111	16.8643	16.9859	16.779	16.7986	16.7329	TISSUE SPECIFICITY: Liver.	0.130926	0.812677	-0.0988129		-0.337689	P53004	15	Biliverdin reductase A	BLVRA
16.3694	17.4149	17.0288	14.3257	16.4633	17.8037	17.294	17.3087	15.8238	18.1179	16.7998	15.661	17.9527	17.0702	16.348	15.9645	17.6821	16.5582	17.3857	TISSUE SPECIFICITY: Predominantly expressed in liver and erythrocytes. At lower levels in heart, lung, adrenal gland and cerebrum. {ECO:0000269|PubMed:7929092}.	0.279039	0.638099	-0.293567		-0.647478	P30043	21	Flavin reductase (NADPH)	BLVRB
14.8645	12.9481	15.7364	16.6048	13.9197	12.4265	14.0056	14.172	14.2108	16.6266	14.9577	12.9265	12.8078	13.5084	13.2131	13.5284	14.2638	13.162	13.4934	NA	1.12371	0.151208	1.02464		1.89512	Q9NSY1	11	BMP-2-inducible protein kinase	BMP2K
14.2561	14.4901	16.2271	15.693	15.1384	15.4845	13.7871	13.8822	14.7338	14.7504	12.5111	13.7774	13.6135	14.1107	13.5896	14.0331	13.1208	13.6287	13.325	NA	1.48335	0.0845205	0.929316	+	2.32274	Q14692	22	Ribosome biogenesis protein BMS1 homolog	BMS1
12.626	12.9568	16.5668	16.6293	12.4095	17.2573	11.1545	11.904	15.2561	13.0632	11.6448	14.6846	18.273	15.6958	17.0132	16.1345	17.059	19.2545	16.6572	NA;TISSUE SPECIFICITY: Highly expressed in testis, uterus and small intestine, and weakly expressed in colon and prostate. Also expressed in skin, primary keratinocytes, immortalized keratinocytes, and HeLa and HEK293 cells. Not detected in blood, thymus, spleen or Hep-G2 cells. {ECO:0000269|PubMed:14988505, ECO:0000269|PubMed:15081112}.	2.77126	0.0119616	-3.30925	+	-3.72243	A0A1B0GX98;B1APH0;F5H586;H0Y6W5;Q06HB9;Q6ZN30;Q6ZN30-2	1	Zinc finger protein basonuclin-2 (Fragment);Zinc finger protein basonuclin-2;Zinc finger protein basonuclin-2;Zinc finger protein basonuclin-2 (Fragment);Basonuclin 2 (Fragment);Zinc finger protein basonuclin-2;Isoform 2 of Zinc finger protein basonuclin-2	BNC2
15.7038	15.1218	15.8969	16.405	15.449	11.9902	14.7497	11.7994	13.5737	17.2768	14.7828	15.1773	10.1196	13.6206	10.4542	10.8554	10.8517	11.2331	10.7681	TISSUE SPECIFICITY: Isoform 1 is highly expressed in heart, brain, liver skeletal muscle and pancreas. Isoform 3 is moderately expressed in placenta, lung and kidney. Isoform 4 is highly expressed in testis and small intestine. {ECO:0000269|PubMed:10217402}.	4.15631	0.00154696	3.69826	+	5.21696	Q12981;Q12981-1	4	Vesicle transport protein SEC20;Isoform 3 of Vesicle transport protein SEC20	BNIP1
14.5028	12.9504	15.0583	14.9717	13.8815	15.4154	13.5736	13.4492	13.7914	14.3039	13.8262	13.0414	13.4314	13.6533	13.8309	13.8104	13.8967	13.6958	12.5391	NA	0.850461	0.242784	0.512716		1.54356	Q8NFC6	25	Biorientation of chromosomes in cell division protein 1-like 1	BOD1L1
17.5574	16.7158	19.2678	19.0318	16.1081	19.6746	16.4051	18.3282	16.4645	17.6581	17.7878	15.4932	16.5051	16.8483	16.8372	17.5903	17.4064	17.4032	16.2444	NA	0.516504	0.425544	0.564608		1.05895	A0A087WZT3;Q9H3K6	12	BolA-like protein 2	BOLA2B
16.1671	15.2695	16.6861	17.0881	16.902	16.2049	14.9939	15.3188	15.7189	16.5897	14.8321	15.2728	10.3189	15.7677	14.811	14.9208	14.6363	15.3074	14.3692	NA	1.83471	0.0488291	1.61586	+	2.71746	Q14137	18	Ribosome biogenesis protein BOP1	BOP1
12.4004	9.69344	13.4405	13.429	12.1658	14.5724	12.3619	12.2707	11.3872	12.2918	11.9454	10.2449	11.2522	10.0788	10.049	10.7622	11.2067	10.7796	12.4925	NA	1.37885	0.0996147	1.23778	+	2.20155	Q96GS4	6	BLOC-1-related complex subunit 6	BORCS6
13.8376	13.4484	15.6548	15.8546	13.8826	15.3481	13.573	12.9501	12.9163	14.4178	13.5898	12.9698	13.3242	12.1464	12.2942	12.5027	12.464	12.9313	6.54188	NA	2.06928	0.0337465	2.29337	+	2.97333	A0A0B4J1R7;Q96B45	3	BORCS7-ASMT readthrough (NMD candidate);BLOC-1-related complex subunit 7	BORCS7-ASMT
12.683	15.0438	14.7717	12.762	13.8863	14.5319	14.057	13.4103	13.4008	14.337	13.1433	12.4061	14.4672	14.2782	13.8684	13.0111	13.9907	12.2897	14.9171	present in the syncytiotrophoblast layer of the placental villi at the feto-maternal interface (at protein level). {ECO:0000269|PubMed:16246416, ECO:0000269|PubMed:3023066, ECO:0000269|PubMed:6313356}.;TISSUE SPECIFICITY: Expressed in red blood cells. Expressed in non-erythroid cells of the placenta	0.118352	0.827998	-0.129012		-0.308486	P07738	6	Bisphosphoglycerate mutase	BPGM
14.7869	15.4691	16.2964	16.4448	14.43	18.4236	15.1693	15.4092	16.2883	14.7184	15.1072	14.2598	15.1452	13.9537	13.8319	15.237	14.9605	13.8168	14.4416	TISSUE SPECIFICITY: Expressed at high levels in liver and kidney and lower levels in heart, intestine and skeletal muscle. {ECO:0000269|PubMed:7759552}.	1.43815	0.0911265	1.08311	+	2.27057	Q86WA6;Q86WA6-2	12	Valacyclovir hydrolase;Isoform 2 of Valacyclovir hydrolase	BPHL
17.2977	16.1177	16.7374	18.6026	15.0687	15.14	15.5621	14.7439	16.2345	17.4316	11.7314	16.2774	16.0168	12.2522	11.8805	14.9918	13.1283	15.8981	11.3037	NA;TISSUE SPECIFICITY: Restricted to cells of the myeloid series.	1.75845	0.0551657	2.27331	+	2.63316	A0A2R8YDF1;P17213	19	Bactericidal permeability-increasing protein	BPI
14.6539	15.5702	14.5708	15.2959	14.3359	16.9714	15.0623	15.1507	14.7468	14.5832	14.6946	13.6814	14.9994	15.911	14.353	14.5617	17.0647	15.1906	14.9782	TISSUE SPECIFICITY: Highly expressed in kidney, liver, pancreas and heart. Detected at lower levels in brain, placenta, lung and skeletal muscle. {ECO:0000269|PubMed:10224133}.	0.40178	0.51663	-0.351		-0.869888	O95861	29	3'(2'),5'-bisphosphate nucleotidase 1	BPNT1
16.4006	16.8779	16.3412	17.2649	16.6462	17.8703	16.6852	15.8472	16.6198	16.6823	15.986	16.677	15.1884	15.5286	15.2081	15.926	15.1015	15.1197	15.1135	NA	4.87523	0.000404494	1.34598	+	6.03717	Q9NX62	14	Golgi-resident adenosine 3',5'-bisphosphate 3'-phosphatase	BPNT2
13.528	13.4354	13.8818	15.4101	13.223	10.8136	12.9799	13.0109	13.2645	14.7499	12.5888	12.4607	13.7541	13.4727	13.0736	12.986	13.267	13.1061	12.2446	NA;TISSUE SPECIFICITY: Ubiquitously expressed, with highest levels in testis. Present in kidney, liver and brain. In the brain, highest levels are found in motor cortex (at protein level). {ECO:0000269|PubMed:10662542, ECO:0000269|PubMed:10727212, ECO:0000269|PubMed:7621746, ECO:0000269|PubMed:9225734}.	0.125735	0.818402	0.149701		0.3257	A0A2R8Y7Q1;E7ETD6;E9PE19;Q12830;Q12830-2;Q12830-4	14	Nucleosome-remodeling factor subunit BPTF;Nucleosome-remodeling factor subunit BPTF (Fragment);Nucleosome-remodeling factor subunit BPTF;Nucleosome-remodeling factor subunit BPTF;Isoform 2 of Nucleosome-remodeling factor subunit BPTF;Isoform 4 of Nucleosome-remodeling factor subunit BPTF	BPTF
12.8227	10.9354	13.5683	13.0922	12.1771	16.0712	11.7788	10.7186	12.9943	13.2022	9.71138	9.42905	10.8516	12.6673	12.8525	12.8304	12.6558	10.358	9.86199	NA;TISSUE SPECIFICITY: Expressed in breast epithelial cell lines. {ECO:0000269|PubMed:9497340}.	0.25728	0.660801	0.48305		0.605272	J3KNN7;Q7Z569	4	BRCA1-associated protein	BRAP
13.8809	11.769	15.7165	15.2066	14.6597	14.0656	13.1348	14.0553	14.9867	15.3166	12.5251	13.9324	13.7023	13.6398	15.1945	13.586	14.2899	13.8864	9.84501	TISSUE SPECIFICITY: Ubiquitously expressed. {ECO:0000269|PubMed:16452482}.	0.478268	0.45554	0.654963		0.997616	Q6PJG6	8	BRCA1-associated ATM activator 1	BRAT1
16.3442	14.4831	16.9009	16.8637	15.6031	17.2698	15.3873	16.232	16.442	16.3595	15.8147	14.1387	14.9609	15.3018	15.1888	15.2662	15.0528	14.5769	14.8685	TISSUE SPECIFICITY: Heart, brain, placenta, lung, liver, skeletal muscle, kidney and pancreas. Aberrantly expressed in the vast majority of breast tumors. {ECO:0000269|PubMed:16707425}.	1.70223	0.0600454	0.955729	+	2.57058	P46736-2;P46736-3	10	Isoform 1 of Lys-63-specific deubiquitinase BRCC36;Isoform 3 of Lys-63-specific deubiquitinase BRCC36	BRCC3
14.5355	11.1211	15.548	14.9639	15.1954	12.808	13.5064	14.251	13.1489	14.798	15.9421	9.92688	10.9866	12.5137	10.4506	9.41684	11.5058	11.0813	10.3204	NA	2.93435	0.00949264	2.91565	+	3.89542	A0A0G2JK44;A0A140T9E9;H0Y6K2;P25440;P25440-2;P25440-3	10	Bromodomain-containing protein 2;Bromodomain-containing protein 2 (Fragment);Bromodomain-containing protein 2 (Fragment);Bromodomain-containing protein 2;Isoform 2 of Bromodomain-containing protein 2;Isoform 3 of Bromodomain-containing protein 2	BRD2
14.9493	12.6944	16.2159	15.0222	13.602	14.387	13.1998	13.5682	12.7004	13.4925	10.8203	13.3464	11.2856	11.0546	11.8317	12.5465	10.2297	12.9527	12.2484	TISSUE SPECIFICITY: Ubiquitous.	2.34651	0.0218395	1.93096	+	3.27105	Q15059	5	Bromodomain-containing protein 3	BRD3
16.3184	16.1766	17.5366	16.9893	16.3102	16.5361	15.1992	15.4158	16.1	17.3223	15.2342	15.6261	15.3875	15.2635	15.5654	14.6296	15.5117	15.4684	15.3759	TISSUE SPECIFICITY: Ubiquitously expressed. {ECO:0000269|PubMed:12543779}.	2.0386	0.0352705	0.915858	+	2.94011	O60885	22	Bromodomain-containing protein 4	BRD4
13.0046	13.7641	14.8504	14.3557	13.7035	12.3844	13.3399	11.6425	12.7838	13.4897	12.1831	12.1859	10.8452	15.3678	11.8101	13.1766	13.4428	11.4036	11.0258	NA	0.600596	0.369645	0.701804		1.18884	Q9NPI1	8	Bromodomain-containing protein 7	BRD7
13.0145	11.3394	12.7538	15.5481	13.46	12.824	12.1087	14.0766	13.3468	11.1805	13.7772	8.39949	11.0855	12.1949	13.488	11.38	13.1912	11.0538	4.02872	NA;TISSUE SPECIFICITY: Expressed in adipose tissue, brain, heart, kidney, liver, lung, pancreas, placenta and skeletal muscle. {ECO:0000269|PubMed:8611617}.	0.841945	0.245729	1.73498		1.53209	B5MCW3;H7C127;H7C128;H7C179;Q9H0E9;Q9H0E9-2;Q9H0E9-4	8	Bromodomain-containing protein 8;Bromodomain-containing protein 8 (Fragment);Bromodomain-containing protein 8 (Fragment);Bromodomain-containing protein 8 (Fragment);Bromodomain-containing protein 8;Isoform 2 of Bromodomain-containing protein 8;Isoform 4 of Bromodomain-containing protein 8	BRD8
10.4226	11.8705	12.1099	13.4273	11.532	10.9755	12.9798	12.8298	12.1755	12.4863	12.129	12.0722	10.3331	12.7053	11.8004	11.7308	13.0494	12.2397	10.45	NA	0.333462	0.580747	0.325808		0.749126	C9JBY0;Q9H8M2;Q9H8M2-1;Q9H8M2-3;Q9H8M2-4;Q9H8M2-6	3	Bromodomain-containing protein 9 (Fragment);Bromodomain-containing protein 9;Isoform 5 of Bromodomain-containing protein 9;Isoform 3 of Bromodomain-containing protein 9;Isoform 4 of Bromodomain-containing protein 9;Isoform 6 of Bromodomain-containing protein 9	BRD9
16.6697	12.987	17.8631	16.2619	17.7779	15.5995	13.8579	16.4445	14.7207	18.8633	15.8897	10.7515	11.0624	11.657	11.5417	10.5868	12.4455	11.4843	11.3899	NA;TISSUE SPECIFICITY: Most abundantly expressed in brain, liver and kidney (PubMed:11860200). Overexpressed in leukemia and lymphoma cell lines, as well as in various carcinomas (PubMed:17943721). {ECO:0000269|PubMed:11860200, ECO:0000269|PubMed:17943721}.	3.71188	0.00302545	4.18802	+	4.72842	A0A5F9ZHY7;Q8WY22	6	BRI3-binding protein	BRI3BP
16.5102	13.5577	15.9546	17.5527	16.4727	15.5402	14.1225	14.7456	15.8219	16.8049	15.1747	15.7602	14.628	13.5612	13.8875	14.348	13.8155	14.2659	14.4496	NA	2.47664	0.0183918	1.53164	+	3.40969	Q8TDN6	14	Ribosome biogenesis protein BRX1 homolog	BRIX1
14.7237	12.8827	15.7663	16.1257	15.3332	14.3488	14.0236	14.3502	15.5999	15.3334	14.8912	13.0149	13.1514	13.7068	14.2616	14.8233	13.8016	13.0868	13.1609	NA	1.4355	0.09147	0.98624	+	2.26751	Q8WUW1;Q8WUW1-2	8	Protein BRICK1;Isoform 2 of Protein BRICK1	BRK1
17.0731	17.0241	17.2955	17.47	16.6382	17.1965	16.4726	17.0967	16.9215	17.6631	16.7319	15.9332	16.8705	17.4756	17.073	16.7531	18.8061	17.7614	15.9266	NA	0.414842	0.505621	-0.278333		-0.892219	Q5VW32	9	BRO1 domain-containing protein BROX	BROX
11.7761	11.3643	12.2096	11.4617	12.1582	13.855	11.5195	11.6531	12.2852	12.9766	12.0074	10.1707	10.6534	11.6354	11.8054	11.5294	11.9106	11.2492	11.0243	NA	0.818288	0.255859	0.552024		1.50001	Q9NW68;Q9NW68-2	9	BSD domain-containing protein 1;Isoform 2 of BSD domain-containing protein 1	BSDC1
18.9008	17.159	19.8178	20.2151	17.2572	20.0465	16.3254	17.9505	18.0518	18.218	17.0399	15.9799	15.7828	17.1055	16.6687	16.5213	15.3392	16.4573	16.5979	TISSUE SPECIFICITY: [Isoform 1]: Retina-specific (PubMed:25957687). Expressed in retinal cone photoreceptors (at protein level) (PubMed:25957687). {ECO:0000269|PubMed:25957687}.;TISSUE SPECIFICITY: [Isoform 2]: Expressed in erythrocytes (at protein level) (PubMed:26195724, PubMed:28409866). Highly expressed in melanoma cell lines (at protein level) (PubMed:11992541). Highly expressed in the heart…	2.12427	0.0308475	1.72693	+	3.03271	P35613;P35613-2	13	Basigin;Isoform 2 of Basigin	BSG
15.1135	14.7665	15.7403	12.8031	14.6996	13.9075	14.6128	15.0191	15.7479	12.8976	14.5342	12.8422	15.1266	15.2938	15.0713	14.4369	15.4138	14.8434	14.3247	NA	0.663804	0.332844	-0.539739		-1.28253	Q5W0U4	11	B box and SPRY domain-containing protein	BSPRY
15.9242	14.2972	16.8853	16.1366	16.113	16.217	15.5153	14.977	15.2398	17.5613	15.1208	14.6792	14.0077	11.7779	13.2911	14.0089	12.8366	10.9149	15.221	TISSUE SPECIFICITY: Predominantly expressed in liver, lung, heart and placenta. Lower levels in pancreas, kidney, skeletal muscle and brain. Overexpressed in multiple myeloma cells. Highly expressed during B-cell development, from pro-B precursors to plasma cells. Highly expressed on T-cells, monocytes, NK cells and dendritic cells (at protein level). {ECO:0000269|PubMed:10329429, ECO:0000269|Pub…	3.69302	0.00311744	2.57107	+	4.70795	Q10589;Q10589-2	5	Bone marrow stromal antigen 2;Isoform 2 of Bone marrow stromal antigen 2	BST2
14.686	12.9067	14.9889	16.3579	13.9587	16.3603	13.1719	13.2313	14.0865	15.2476	13.4746	13.1147	13.1334	15.111	14.7405	14.5559	12.4867	12.5504	11.816	NA	0.72062	0.302331	0.813928		1.36426	A0A0A0MTH9;O14981	13	TATA-binding protein-associated factor 172	BTAF1
11.9238	14.5249	13.7096	13.3201	12.3084	15.7334	16.5119	10.8616	11.7843	13.7508	11.6989	14.7299	15.4932	11.1793	14.2269	14.6074	13.5454	11.258	15.5639	NA	0.133856	0.809202	-0.2915		-0.344415	P43251;P43251-2;P43251-3;P43251-4	2	Biotinidase;Isoform 2 of Biotinidase;Isoform 3 of Biotinidase;Isoform 4 of Biotinidase	BTD
16.0961	16.5505	16.5768	14.0735	16.1754	17.5138	16.0984	15.9738	16.2207	15.5498	16.0472	15.7799	15.4015	16.3958	15.8397	15.5936	15.9484	16.0642	16.1535	NA	0.177673	0.753648	0.140835		0.441742	P20290	15	Transcription factor BTF3	BTF3
17.5538	16.4748	17.4367	17.5797	16.5105	19.6571	15.7514	17.006	17.1019	18.735	16.7956	16.3502	16.2104	15.4163	14.8918	15.3771	16.1782	16.2864	15.9687	NA	2.45533	0.0188692	1.48478	+	3.38702	Q96K17	12	Transcription factor BTF3 homolog 4	BTF3L4
15.359	14.4538	14.5626	13.5132	13.095	11.6804	13.3473	14.1703	13.2563	15.4902	14.7399	14.2614	12.7713	10.8467	10.7727	10.251	10.5167	10.7943	11.3052	TISSUE SPECIFICITY: Predominantly expressed in B-lymphocytes.	5.0623	0.000394366	2.95727	+	6.25797	Q06187;Q06187-2	3	Tyrosine-protein kinase BTK;Isoform BTK-C of Tyrosine-protein kinase BTK	BTK
13.7898	13.0298	13.6984	13.0381	12.6706	12.6462	13.4135	13.1256	14.5759	14.3066	13.5804	12.4863	16.8168	12.3527	11.4144	11.9594	13.0362	12.6081	10.4442	TISSUE SPECIFICITY: Detected in peripheral blood mononuclear cells and in T-cells (at protein level). Detected in spleen and lymphocytes. {ECO:0000269|PubMed:20610803}.	0.55915	0.396882	0.701736		1.12563	O00478	4	Butyrophilin subfamily 3 member A3	BTN3A3
17.8793	17.2616	18.8105	18.2924	17.7213	19.6392	17.4405	17.6249	16.8056	18.0917	16.9394	17.5299	17.181	17.8799	17.7764	17.4752	18.115	17.64	16.9726	NA	0.360355	0.554502	0.25917		0.797499	O43684;O43684-2	16	Mitotic checkpoint protein BUB3;Isoform 2 of Mitotic checkpoint protein BUB3	BUB3
13.8337	12.3337	14.77	14.6378	13.7622	12.6194	13.3247	12.5469	13.8501	14.1389	12.6383	12.8512	10.7422	11.3592	13.9803	13.6813	13.4316	13.1328	10.8606	NA	1.14851	0.145208	0.986805		1.92568	Q9BRD0	4	BUD13 homolog	BUD13
15.6676	15.1348	17.0209	17.2111	15.4879	15.1912	14.4661	15.3418	15.5039	15.551	15.9258	13.2301	14.1383	15.0505	14.3126	14.2396	15.3715	14.6146	14.0474	TISSUE SPECIFICITY: Detected in epithelial and stromal cells in benign prostate hyperplasia tissue (at protein level). {ECO:0000269|PubMed:25091737}.	1.39499	0.0972481	0.938465	+	2.2204	P41223	13	Protein BUD31 homolog	BUD31
15.9634	15.3611	16.529	17.3003	16.1529	15.3833	14.4015	16.0051	14.9053	16.2066	15.2741	16.1452	14.569	15.7113	14.9216	15.1723	14.7673	15.4661	14.9748	TISSUE SPECIFICITY: Found in the placenta from the sixth week of pregnancy. Was localized in the cytoplasm of the syncytiotrophoblast in the chorionic villi and in endometrial decidual cells at the uteroplacental interface. After week 10, the level decreased and then disappeared from placental villi.	1.42893	0.0925409	0.719121	+	2.25989	Q13895	13	Bystin	BYSL
17.7225	17.663	18.3602	18.3279	17.9841	19.4842	16.5577	17.4847	17.1777	18.3814	17.0198	17.5193	17.1141	17.6446	17.2392	17.0382	17.7288	18.654	16.9418	NA	0.456031	0.472377	0.326773		0.96121	Q7L1Q6;Q7L1Q6-3;Q7L1Q6-4	23	Basic leucine zipper and W2 domain-containing protein 1;Isoform 3 of Basic leucine zipper and W2 domain-containing protein 1;Isoform 4 of Basic leucine zipper and W2 domain-containing protein 1	BZW1
16.9587	17.1495	17.7895	17.6672	17.2489	17.6989	15.887	16.6335	16.7435	17.3579	16.0125	16.1046	15.3419	16.9285	16.6596	16.8654	16.5608	16.9322	16.1266	NA	0.80274	0.263098	0.449783		1.47877	E7ETZ4;Q9Y6E2	24	Basic leucine zipper and W2 domain-containing protein 2 (Fragment);Basic leucine zipper and W2 domain-containing protein 2	BZW2
16.2109	16.5325	16.9688	15.4223	15.2551	17.1422	16.4227	17.0138	17.7886	16.7508	16.1575	16.2988	17.0855	16.2006	16.1702	16.0131	15.9688	17.0115	16.6573	NA	0.0640391	0.902217	0.0531359		0.175318	A0A087WT99;Q9H0W9;Q9H0W9-2	20	Ester hydrolase C11orf54;Ester hydrolase C11orf54;Isoform 2 of Ester hydrolase C11orf54	C11orf54
14.7334	12.3394	16.4803	16.3436	16.5659	11.5574	14.9614	14.9	16.1278	16.55	15.4677	13.1521	14.2799	14.7696	13.9828	14.7154	13.8405	14.6718	8.93134	NA	0.822028	0.254397	1.33282		1.5051	Q9H3H3;Q9H3H3-1;Q9H3H3-3	5	UPF0696 protein C11orf68;Isoform 1 of UPF0696 protein C11orf68;Isoform 3 of UPF0696 protein C11orf68	C11orf68
12.8759	11.8873	12.5534	14.0583	9.678	14.4861	12.9537	10.6218	14.2702	14.5182	12.6941	14.9681	15.726	12.3043	15.2529	15.0523	13.9061	15.031	15.6623	NA	1.58726	0.0716578	-1.74121	+	-2.4413	Q7Z7L8	4	Uncharacterized protein C11orf96	C11orf96
13.408	13.0221	13.3489	13.5445	16.1226	17.4303	13.6355	14.8549	12.8535	13.244	14.4971	13.9474	11.9748	12.0407	12.3933	12.0548	12.7709	14.0482	12.7785	NA	1.89888	0.0440415	1.57889	+	2.78793	E9PRG8	8	Uncharacterized protein C11orf98	C11orf98
12.7512	12.1105	12.1684	14.272	11.1136	10.0917	10.7666	11.1768	12.9221	13.4665	10.6997	10.5199	12.814	12.6896	12.3206	12.5354	12.0619	12.1962	10.668	NA	0.273831	0.643153	-0.345433		-0.637464	Q8N999	2	Uncharacterized protein C12orf29	C12orf29
13.9031	11.5449	12.9795	14.8813	13.8812	14.4518	12.4246	12.8952	12.1456	14.9269	12.3863	12.5031	12.0136	12.9797	12.5113	12.4561	13.0792	12.5898	13.1242	NA	0.650005	0.340082	0.56451		1.26234	E7ENF1;F5H3K2;F5H7W8;Q96C57	2	Chromosome 12 open reading frame 43;Chromosome 12 open reading frame 43 (Fragment);Chromosome 12 open reading frame 43;Protein CUSTOS	C12orf43
14.0765	11.8046	14.7485	15.2013	14.2764	12.3395	12.2108	13.447	14.3444	14.8949	12.7306	11.8521	13.1773	12.7987	14.3268	13.5654	13.9762	13.5652	11.8809	NA	0.120752	0.825024	0.166693		0.314103	Q9NWQ9	3	Uncharacterized protein C14orf119	C14orf119
13.6276	14.3572	15.6635	15.1123	15.3702	17.0082	14.0449	12.7594	14.3528	15.3909	12.9652	12.7323	13.0169	12.9186	13.7549	13.1698	13.6443	13.5798	11.9312	NA	1.58823	0.0715285	1.30362	+	2.4424	A0A0A6YYH1;Q7Z6K5-2	12	Protein C15orf38-AP3S2;Isoform C15orf38-AP3S2 of Arpin	C15orf38-AP3S2
15.6414	15.4063	16.0104	16.3888	13.9737	18.3503	15.2365	14.8506	15.5847	12.6984	14.8221	14.7521	14.9182	14.7807	14.909	15.968	15.5416	14.9566	14.1827	NA;TISSUE SPECIFICITY: Highly expressed in testis and also expressed in fetal testis.	0.205052	0.71852	0.272938		0.499747	J9JIC5;Q9HAS0	5	Protein Njmu-R1	C17orf75
12.239	11.9811	13.2845	13.5717	11.5016	10.5591	9.54367	12.2918	11.3596	14.197	11.9432	9.51924	11.2536	9.45156	10.0752	8.62982	8.12469	10.9087	10.3592	NA	2.17296	0.0286584	2.00366	+	3.08514	Q32NC0;Q32NC0-2	1	UPF0711 protein C18orf21;Isoform 2 of UPF0711 protein C18orf21	C18orf21
15.3477	14.8291	14.8363	14.382	14.9138	11.7171	14.7367	14.1701	12.6852	16.7101	13.6613	14.5897	14.3268	12.9238	13.871	13.5148	14.4467	14.9285	14.1677	NA	0.298261	0.617848	0.355984		0.683993	Q8TCD1	3	UPF0729 protein C18orf32	C18orf32
13.7792	11.702	15.0876	13.5655	14.5623	17.4296	15.9914	13.3709	12.6532	15.2736	13.7885	13.7655	11.1571	11.0719	14.144	16.0783	13.8011	13.5637	13.4327	NA	0.612588	0.362113	0.926184		1.20686	E7EP72;Q9UFG5	4	UPF0449 protein C19orf25	C19orf25
11.4207	9.49462	12.8528	13.3232	12.4745	12.2802	10.0122	11.3562	12.5729	12.886	11.4042	12.864	11.1584	7.61042	12.0842	13.4828	12.5066	10.8553	10.4468	NA	0.519941	0.423009	0.748287		1.06439	A0A0A0MQS3;K7ESE5;Q9UNZ5	1	Leydig cell tumor 10 kDa protein homolog (Fragment);Leydig cell tumor 10 kDa protein homolog;Leydig cell tumor 10 kDa protein homolog	C19orf53
14.0172	15.3122	14.2765	14.7542	14.1104	12.5281	14.1293	13.5213	15.4052	16.0146	14.0168	13.3212	13.3173	12.564	13.4103	13.3364	11.3966	13.7298	9.48844	TISSUE SPECIFICITY: Widely expressed. Highly expressed in kidney, heart, placenta and liver. {ECO:0000269|PubMed:11677243}.	2.28128	0.0240068	1.82066	+	3.20132	Q9NS00;Q9NS00-2	5	Glycoprotein-N-acetylgalactosamine 3-beta-galactosyltransferase 1;Isoform 2 of Glycoprotein-N-acetylgalactosamine 3-beta-galactosyltransferase 1	C1GALT1
13.088	12.0982	12.8587	13.155	14.8127	16.125	12.7361	12.9928	13.699	12.7151	11.3455	11.9124	11.9099	13.5796	13.1653	12.7082	13.2805	12.4887	11.3367	NA	0.421269	0.500435	0.489809		0.903123	Q8IYL3	2	UPF0688 protein C1orf174	C1orf174
14.5831	14.652	16.107	16.3165	14.1912	15.1953	14.4259	14.0041	11.9246	15.7085	14.1098	14.0529	15.1571	14.337	13.5832	13.6365	14.6339	12.4582	14.2302	NA	0.591516	0.375487	0.60076		1.17512	Q9H425;Q9H425-3	6	Uncharacterized protein C1orf198;Isoform 3 of Uncharacterized protein C1orf198	C1orf198
14.3456	15.5314	12.5627	14.9435	11.5611	14.2794	16.2663	14.4985	13.1193	11.8057	13.6713	10.2856	13.6359	12.8677	13.1112	13.4304	13.2618	12.8783	13.5076	NA	0.19884	0.72583	0.330674		0.486761	Q9BV19	6	Uncharacterized protein C1orf50	C1orf50
14.1549	16.3284	13.8479	13.9145	16.2509	16.458	17.114	14.6652	14.9565	13.375	15.8378	13.036	16.2804	13.0856	14.8367	13.9299	13.3379	15.899	13.8101	NA	0.395016	0.52248	0.540731		0.858233	P02745	5	Complement C1q subcomponent subunit A	C1QA
14.0503	15.9776	15.2562	17.0849	15.4234	17.1809	16.9221	14.654	16.2871	12.8726	15.1224	13.8005	16.2519	13.9095	15.0144	14.3568	13.5091	16.1741	13.6271	NA	0.555644	0.398911	0.694165		1.12021	A0A0A0MSV6;D6R934;P02746	10	Complement C1q subcomponent subunit B (Fragment);Complement C1q subcomponent subunit B;Complement C1q subcomponent subunit B	C1QB
16.5614	17.4343	17.7497	12.7623	18.7517	14.2038	16.4154	18.6549	15.4678	15.8119	18.3437	16.421	13.6545	16.3631	13.2385	13.4513	15.6016	12.6175	16.1344	Surface expression is reported for macrophages and monocyte-derived dendritic cells. {ECO:0000269|PubMed:12574814, ECO:0000269|PubMed:8662673}.;TISSUE SPECIFICITY: Expressed on cell surface of peripheral blood cells (at protein level)	1.70413	0.0599648	2.11088	+	2.5727	Q07021	11	Complement component 1 Q subcomponent-binding protein, mitochondrial	C1QBP
14.7988	18.2422	17.0918	12.4748	16.4709	18.9048	18.827	17.3765	15.8604	16.9904	16.8358	16.3595	17.3946	15.7717	14.8135	13.5927	14.9476	18.7132	13.2571	NA	0.709769	0.30757	1.18743		1.34882	P02747	4	Complement C1q subcomponent subunit C	C1QC
14.4637	15.618	16.5416	17.4042	15.1604	17.0106	15.5867	14.026	15.4772	16.9829	15.5617	14.0642	16.1866	14.9215	15.5309	15.2552	15.8794	17.0797	15.6693	NA	0.103321	0.849558	-0.13086		-0.27282	A0A3B3ISR2;B4DPQ0;P00736	22	Complement C1r subcomponent	C1R
15.1028	16.3	16.1936	16.7732	15.0247	16.9915	15.2549	14.1476	15.5639	16.5017	15.4288	14.0743	16.7213	14.0209	14.6611	14.8411	15.0899	16.7242	15.4191	NA	0.231293	0.688707	0.259152		0.553551	A0A087X232;P09871	17	Complement C1s subcomponent	C1S
13.3138	13.6798	13.3013	12.8043	12.4253	13.3125	12.8918	13.2347	12.426	12.7527	13.7152	11.496	15.372	14.0513	15.1937	14.8919	15.7927	14.9243	13.6414	NA	4.768	0.000514851	-1.89205	+	-5.91208	H7BYU9;Q9GZN8;Q9GZN8-2	1	UPF0687 protein C20orf27 (Fragment);UPF0687 protein C20orf27;Isoform 2 of UPF0687 protein C20orf27	C20orf27
13.9926	13.9572	14.3778	15.769	14.2713	13.9982	13.4623	13.3363	14.1422	14.8721	13.9845	13.3983	12.2389	13.196	13.2154	13.8314	14.3675	13.4812	13.3969	NA	1.49273	0.0834885	0.740523	+	2.33351	Q86YS7;Q86YS7-3	14	C2 domain-containing protein 5;Isoform 3 of C2 domain-containing protein 5	C2CD5
15.9168	14.516	16.1162	15.9996	15.923	11.8728	13.6483	14.5452	11.9453	15.949	15.0994	10.5197	10.5601	14.6144	15.211	11.1728	13.3165	15.6684	11.1231	NA	0.676765	0.324911	1.24241		1.30137	C9J4K0;Q9BVC5;Q9BVC5-2	3	Ashwin;Ashwin;Isoform 2 of Ashwin	C2orf49
9.6434	12.3431	12.5515	13.215	11.7558	15.1279	14.1868	12.1316	13.8691	14.1069	12.5775	11.6078	10.9214	10.9752	11.8415	11.6002	9.15823	10.4395	11.2356	NA	2.14874	0.0296488	1.87805	+	3.05908	A6NCS6	5	Uncharacterized protein C2orf72	C2orf72
14.8602	13.9815	12.8806	13.124	12.0803	15.6187	14.0737	13.4865	12.6385	12.1133	12.6381	14.8697	13.329	14.8058	13.1449	11.7791	13.6316	14.1195	11.6108	NA	0.251259	0.668361	0.327477		0.59342	Q3KRA6	2	UPF0538 protein C2orf76	C2orf76
18.4253	19.5543	19.4969	19.8	17.5451	21.2373	18.923	17.8567	18.8412	19.9894	19.1129	18.0388	22.1966	19.6504	20.4259	20.2568	20.1108	21.6234	21.2201	TISSUE SPECIFICITY: Plasma. The acylation stimulating protein (ASP) is expressed in adipocytes and released into the plasma during both the fasting and postprandial periods. {ECO:0000269|PubMed:15833747, ECO:0000269|PubMed:9555951}.	2.67364	0.0137292	-1.71501	+	-3.6189	P01024	133	Complement C3	C3
14.2522	12.0939	16.6277	15.1348	13.9855	12.8784	11.4335	14.4072	11.3074	14.9651	12.6836	14.5377	13.9616	13.4872	13.5673	10.8581	13.2769	13.6349	11.2594	NA	0.58088	0.381831	0.828613		1.15896	Q5JPI3;Q5JPI3-2	3	Uncharacterized protein C3orf38;Isoform 2 of Uncharacterized protein C3orf38	C3orf38
15.7982	16.3798	16.5201	18.1802	14.0565	17.6451	18.9746	15.4388	18.2563	12.3049	16.6771	15.6171	17.4747	16.641	17.2153	16.4971	16.5134	18.2662	17.2343	NA	0.527987	0.417497	-0.799569		-1.07708	A0A140TA32	2	Complement C4-A	C4A
15.8088	16.4738	17.1064	17.2875	14.9744	17.2463	15.9151	14.9141	16.9293	17.5971	16.2868	14.9857	18.2614	16.1316	17.1837	16.5576	15.5175	17.9264	17.6962	TISSUE SPECIFICITY: Complement component C4 is expressed at highest levels in the liver, at moderate levels in the adrenal cortex, adrenal medulla, thyroid gland, and the kidney, and at lowest levels in the heart, ovary, small intestine, thymus, pancreas and spleen. The extra-hepatic sites of expression may be important for the local protection and inflammatory response. {ECO:0000269|PubMed:11367…	0.884886	0.22939	-0.745443		-1.58959	P0C0L5	72	Complement C4-B	C4B
16.9158	17.9458	16.1949	17.938	15.9024	18.5122	18.0684	16.3	17.1545	17.9319	15.7063	16.098	20.177	16.979	17.5848	17.2203	16.8179	19.5319	18.5756	TISSUE SPECIFICITY: Chylomicrons in the plasma.	1.21447	0.129896	-1.07096		-2.00608	P04003	30	C4b-binding protein alpha chain	C4BPA
12.4903	13.8834	14.4812	12.7297	13.0162	14.6569	15.2425	13.0172	16.9134	15.1097	9.8125	12.126	16.1289	12.9865	13.8981	14.5048	13.7023	15.9255	14.4706	NA	0.577316	0.384189	-0.893402		-1.15352	P20851;P20851-2	5	C4b-binding protein beta chain;Isoform 2 of C4b-binding protein beta chain	C4BPB
12.1252	11.1628	13.7766	12.9401	13.9175	12.7974	12.4023	13.196	16.4488	14.9213	14.102	11.9065	13.1769	13.8253	13.6952	13.2998	13.4723	12.4311	10.8388	NA	0.230651	0.68929	0.345263		0.552255	Q8N1A6	3	UPF0462 protein C4orf33	C4orf33
15.0098	15.8013	16.3327	17.7936	15.4982	16.9784	14.8748	14.7665	15.3479	16.4806	15.0494	13.7408	17.5864	14.7466	15.4958	15.9279	15.5916	17.8562	16.3943	NA	0.548314	0.403647	-0.588891		-1.10885	P01031	28	Complement C5	C5
14.1336	14.752	14.418	12.2514	14.2449	14.4266	13.3275	14.2352	11.3764	14.7201	13.5613	13.8181	10.707	12.8967	13.0998	12.9251	15.0173	10.7137	10.299	NA	1.60006	0.070336	1.53515	+	2.45579	Q49AR2	5	UPF0489 protein C5orf22	C5orf22
12.6906	12.2091	14.0216	12.8229	11.587	11.6493	12.543	12.6457	12.0886	12.9075	12.138	12.1683	12.5993	12.9317	12.5393	12.5609	12.7253	10.7765	12.1882	NA	0.152326	0.78588	0.124369		0.386166	Q7Z6I8	3	UPF0461 protein C5orf24	C5orf24
13.6583	11.9949	13.2356	13.55	12.7605	13.0531	10.4557	12.6349	12.3129	13.9562	13.2755	11.3742	13.9279	12.7885	11.4977	10.7223	13.5884	10.6285	10.0668	NA	0.723412	0.30112	0.799892		1.36823	A6NDU8	2	UPF0600 protein C5orf51	C5orf51
15.2432	14.7057	16.0803	17.2648	13.7517	15.3428	14.0781	11.0802	15.2409	16.7818	15.3244	14.6277	16.9364	14.5727	15.5887	16.1676	14.4869	17.7718	15.0765	NA	0.607135	0.365644	-0.839948		-1.19868	P13671	10	Complement component C6	C6
13.6808	12.283	14.311	13.8136	14.2612	14.2811	14.4555	13.3556	14.0681	12.9689	14.1746	13.1138	13.7009	13.1232	12.0272	11.7579	12.7666	13.8095	11.6846	TISSUE SPECIFICITY: Mainly expressed in hepatocytes and some weak expression in germinal center cells of lymph nodes. {ECO:0000269|PubMed:22340178}.	1.97687	0.0385462	1.03489	+	2.87307	Q7Z4R8	5	UPF0669 protein C6orf120	C6orf120
12.272	13.8286	12.839	17.1711	13.2986	14.2742	11.6824	11.0673	13.1623	15.5434	12.9136	11.8408	15.791	12.4556	13.4918	13.8475	13.1042	15.4492	15.3181	NA	0.590526	0.376064	-0.883774		-1.17362	P10643	6	Complement component C7	C7
11.7695	11.1566	15.6553	12.5689	12.0962	12.6103	11.8069	11.2138	12.0127	16.6523	11.85	10.914	11.5007	10.3854	11.549	12.5391	11.7772	10.916	9.72966	NA	1.05679	0.170309	1.326		1.81166	Q9BPX7;Q9BPX7-2	2	UPF0415 protein C7orf25;Isoform 2 of UPF0415 protein C7orf25	C7orf25
14.3731	12.0464	13.9387	16.791	16.0714	12.9972	11.4519	15.4567	11.6953	13.162	14.9674	12.2408	15.947	11.765	10.2796	11.7921	13.6773	10.4668	11.8616	NA	0.979474	0.196114	1.51037		1.71326	C9JQV0;Q9BRJ6	7	Uncharacterized protein C7orf50 (Fragment);Uncharacterized protein C7orf50	C7orf50
12.5246	14.5599	15.4533	17.7826	13.445	15.4171	14.3135	11.8603	14.9684	17.4344	14.5042	13.7273	16.725	14.1651	14.8257	15.0949	14.9639	16.4816	16.248	NA	0.577309	0.384105	-0.834714		-1.15351	P07357	8	Complement component C8 alpha chain	C8A
12.351	14.8958	15.3988	18.2832	13.6334	15.8623	14.6831	12.1758	14.6661	15.7271	13.8777	12.97	17.4745	14.067	14.4962	15.6733	15.0856	16.7349	15.9158	NA	0.803397	0.262774	-1.09163		-1.47967	P07358	9	Complement component C8 beta chain	C8B
16.3796	14.419	19.0662	16.3752	13.9788	14.1413	13.7934	12.4501	14.7508	17.8037	13.952	12.9633	15.7464	13.0086	14.0743	14.4525	13.8635	15.7951	13.005	NA	0.407494	0.511896	0.728229		0.879684	P07360	7	Complement component C8 gamma chain	C8G
16.0988	15.4394	13.5124	13.41	14.0816	16.1283	15.0522	14.6678	13.2395	12.4487	14.7131	10.1653	11.0307	16.3178	15.302	16.2778	16.6607	11.7293	14.3731	NA	0.200265	0.724339	-0.447587		-0.489748	A0A3B3IRR6;A0A3B3IT54;A0A3B3ITA3;Q9H7E9;Q9H7E9-2	2	UPF0488 protein C8orf33;UPF0488 protein C8orf33;UPF0488 protein C8orf33;UPF0488 protein C8orf33;Isoform 2 of UPF0488 protein C8orf33	C8orf33
16.6467	14.8385	12.6092	19.7462	14.7336	13.7551	15.1527	14.1522	11.9754	12.2656	13.0437	12.9591	13.0953	13.8593	12.5465	14.5622	14.9858	14.1392	11.0039	NA	0.444699	0.48217	0.867129		0.942436	Q6P1X6	5	UPF0598 protein C8orf82	C8orf82
16.0683	17.0565	19.6307	19.6075	15.7202	17.8443	15.9675	15.9707	16.1626	19.008	16.3241	15.0928	18.982	15.7781	15.9653	16.6782	16.2953	19.5137	16.5807	TISSUE SPECIFICITY: Plasma (at protein level). {ECO:0000269|PubMed:22832194, ECO:0000269|PubMed:26841934, ECO:0000269|PubMed:8603752, ECO:0000269|PubMed:9212048, ECO:0000269|PubMed:9634479}.	0.0361799	0.943592	-0.0755673		-0.101849	P02748	20	Complement component C9	C9
14.3541	15.2747	15.4635	15.4163	14.5389	16.7627	14.8958	14.7412	15.3623	15.607	13.9733	14.1866	15.3528	14.443	14.8418	15.1255	15.115	14.8098	14.5246	NA	0.215435	0.7072	0.160527		0.521236	Q5T6V5	16	Queuosine salvage protein	C9orf64
15.7805	14.4553	15.9274	15.1892	14.2767	15.8792	10.93	14.4178	13.7258	14.8984	14.2889	13.5618	13.4587	13.6829	13.8824	13.0249	14.254	13.7092	10.4137	NA	1.16797	0.140541	1.24056		1.94953	Q9NZ63	3	Telomere length and silencing protein 1 homolog	C9orf78
18.3251	21.0364	18.0863	18.4817	17.723	19.4138	19.6206	19.3956	20.9796	20.9853	19.2062	17.6838	21.6767	19.7307	19.2644	18.159	17.5538	17.6338	20.4403	NA	0.0197271	0.968555	0.0363931		0.056512	P00915	39	Carbonic anhydrase 1	CA1
15.8788	14.497	16.4884	17.0188	13.6253	17.2571	16.5664	16.3672	17.4542	17.0341	17.3681	12.9124	12.6719	15.0146	13.8131	15.137	13.1175	14.0177	14.4162	TISSUE SPECIFICITY: Highly expressed in colon, kidney, prostate, intestine and activated lymphocytes. Expressed at much higher levels in the renal cell cancers than in surrounding normal kidney tissue. Moderately expressed in pancreas, ovary and testis. Expressed in sweat glands and bronchiolar epithelium (PubMed:26911677). {ECO:0000269|PubMed:26911677}.	2.22395	0.0263026	2.01215	+	3.1399	O43570;O43570-2	9	Carbonic anhydrase 12;Isoform 2 of Carbonic anhydrase 12	CA12
16.077	13.4884	13.2235	12.7194	11.5019	16.685	12.346	11.4345	14.4246	13.7012	11.6925	11.311	6.40838	13.3463	10.986	13.3057	13.5684	4.63362	11.5348	TISSUE SPECIFICITY: Expressed in thymus, small intestine, spleen, prostate, ovary, colon and testis. {ECO:0000269|PubMed:14600151}.	1.36381	0.102074	2.67663	+	2.18392	Q8N1Q1	2	Carbonic anhydrase 13	CA13
18.112	19.9874	18.1434	17.4354	15.8974	22.1988	19.6922	18.6327	20.9122	19.9238	19.8989	16.5208	20.324	19.1052	19.4314	19.6022	19.3785	17.7323	19.8683	NA	0.227712	0.692351	-0.40257		-0.546306	P00918	36	Carbonic anhydrase 2	CA2
11.4816	14.566	12.5807	12.4391	13.1832	12.2489	12.6918	12.5927	12.7896	12.6527	11.8168	11.7773	18.6348	14.0213	11.3907	10.3025	11.8412	12.6346	14.6533	TISSUE SPECIFICITY: Muscle specific.	0.44101	0.484693	-0.785685		-0.936291	P07451	3	Carbonic anhydrase 3	CA3
13.0386	11.4201	16.5462	13.3621	13.6759	14.5528	14.645	11.8387	15.6809	15.9854	13.4327	13.4343	12.0314	12.1634	13.2013	11.5503	11.3185	12.7977	12.7523	TISSUE SPECIFICITY: Expressed in the endothelium of the choriocapillaris in eyes (at protein level). Not expressed in the retinal epithelium at detectable levels. {ECO:0000269|PubMed:15563508}.	1.81315	0.0506167	1.70847	+	2.69369	P22748	13	Carbonic anhydrase 4	CA4
14.7773	11.4899	11.7263	16.4935	14.7588	11.0183	15.2518	14.7173	12.1997	12.4242	13.177	14.3926	12.667	15.9539	16.0234	15.6921	15.7074	14.4064	11.0311	NA;TISSUE SPECIFICITY: Ubiquitous. {ECO:0000269|PubMed:21980415}.	0.54843	0.403723	-0.961761		-1.10903	A0A3B3ISJ3;Q9H8G2	1	Caspase activity and apoptosis inhibitor 1	CAAP1
16.9069	16.5181	16.0006	17.0597	16.2751	17.3458	16.1974	16.5451	15.7197	16.3781	16.3438	16.4307	16.5182	16.2393	16.2369	16.0476	16.3859	16.5289	15.5496	NA	0.693524	0.31608	0.261551		1.32556	Q9Y376	22	Calcium-binding protein 39	CAB39
15.7008	15.3186	15.5442	17.3889	14.6651	13.949	14.5979	14.936	13.9025	16.1532	14.6151	15.4689	14.7407	15.5812	13.2961	15.1466	14.5985	15.7911	15.446	NA	0.229624	0.690592	0.243776		0.550179	Q9H9S4	11	Calcium-binding protein 39-like	CAB39L
14.8912	14.9396	16.7314	16.8019	14.251	11.6786	14.8725	14.0556	15.8208	16.0016	15.0461	15.7512	13.8587	12.5768	14.2797	14.9193	12.6829	14.5885	15.1086	TISSUE SPECIFICITY: Isoform 1 is expressed in skeletal muscle. Isoform 2 is expressed in the central nervous system. Isoform 2, isoform 4 and isoform 5 are expressed in neuroblastoma cells. Isoform 3, isoform 4 and isoform 5 are expressed in the aorta. {ECO:0000269|PubMed:1309651, ECO:0000269|PubMed:8107964}.	1.0275	0.179786	1.06807		1.77465	P54289-4	16	Isoform 4 of Voltage-dependent calcium channel subunit alpha-2/delta-1	CACNA2D1
12.1424	11.77	13.2502	14.0724	14.075	12.1604	10.543	13.0337	11.8762	12.046	10.2553	8.2211	10.9969	10.8047	11.6934	9.86246	12.4183	10.1528	10.7732	NA;TISSUE SPECIFICITY: Expressed predominantly in the cerebellum and kidney.	0.783897	0.270951	0.996394		1.45285	A0A1B0GUI8;A0A1C7CYX2;O00305;O00305-4	2	Voltage-dependent L-type calcium channel subunit beta-4;Voltage-dependent L-type calcium channel subunit beta-4;Voltage-dependent L-type calcium channel subunit beta-4;Isoform 4 of Voltage-dependent L-type calcium channel subunit beta-4	CACNB4
19.4084	18.6432	20.8418	20.376	18.729	20.1716	17.5867	19.0729	18.5311	21.1715	19.2245	11.245	17.6887	17.3655	18.14	18.2854	17.702	18.3074	10.7876	TISSUE SPECIFICITY: Detected in heart left ventricle. {ECO:0000269|PubMed:21127204}.	0.804523	0.262227	1.8535		1.48121	Q9BXT2	1	Voltage-dependent calcium channel gamma-6 subunit	CACNG6
12.9689	12.9354	13.0567	14.8093	12.1298	15.0082	11.9455	13.681	13.9967	11.2752	12.6016	13.3371	11.9903	12.4443	13.589	12.3991	12.5755	12.0408	12.1424	NA	0.836927	0.247799	0.690968		1.52531	Q8WUQ7;Q8WUQ7-2	7	Cactin;Isoform 2 of Cactin	CACTIN
17.2523	16.1009	18.7695	17.1223	17.774	18.2988	15.8481	16.2001	16.8021	18.042	16.1398	15.6765	15.8712	16.5112	15.9242	15.3225	16.3384	15.9242	15.6027	NA	1.72531	0.0579821	1.07444	+	2.59631	Q9HB71	30	Calcyclin-binding protein	CACYBP
17.005	17.0327	17.8371	17.8585	17.0863	17.1354	15.7129	16.5829	16.518	17.2238	16.0872	16.2182	15.6762	16.8098	16.581	16.9183	16.3791	16.5374	16.1589	NA	0.825537	0.252986	0.420932		1.50987	F8VPD4;P27708	56	CAD protein	CAD
12.3654	11.032	13.2395	14.3406	12.8591	16.3453	13.4825	13.7023	14.9507	12.5069	13.899	11.3557	10.5755	14.921	14.2882	13.2415	14.5398	13.9536	14.0141	NA;TISSUE SPECIFICITY: Specifically expressed in neural and endocrine secretory tissues. Expressed in brain and pancreas and at low level in heart. Also expressed in fetal heart, cerebellum, cerebral cortex, medulla, occipital pole, frontal and temporal lobes, and putamen, as well as weak expression in spinal cord. {ECO:0000269|PubMed:12659812}.	0.176503	0.754158	-0.307753		-0.439218	F1T0E5;Q9ULU8;Q9ULU8-2;Q9ULU8-3;Q9ULU8-4	3	Calcium-dependent secretion activator 1;Calcium-dependent secretion activator 1;Isoform 2 of Calcium-dependent secretion activator 1;Isoform 3 of Calcium-dependent secretion activator 1;Isoform 4 of Calcium-dependent secretion activator 1	CADPS
10.5794	9.7587	13.5063	13.0045	11.5279	10.1267	9.25506	10.4174	12.0219	15.9867	11.555	11.3635	10.3822	11.4292	10.6539	10.9863	9.55392	15.534	11.3231	NA;TISSUE SPECIFICITY: Widely expressed. Expressed in all adult and fetal tissues examined, with the strongest expression in kidney and pancreas. In brain, it is expressed at high levels in cerebellum, to a lesser degree in cerebral cortex, occipital pole, and frontal and temporal lobes. Only weakly expressed in medulla, spinal cord and putamen. {ECO:0000269|PubMed:12659812}.	0.0750585	0.886782	0.182979		0.203342	C9IYE1;Q86UW7;Q86UW7-2;Q86UW7-3	5	Calcium-dependent secretion activator 2;Calcium-dependent secretion activator 2;Isoform 2 of Calcium-dependent secretion activator 2;Isoform 3 of Calcium-dependent secretion activator 2	CADPS2
14.0476	12.4995	18.4858	16.7211	13.1783	16.2472	16.4065	12.1058	15.776	15.365	15.6634	13.2793	13.6032	11.0975	13.4399	13.4326	13.5817	14.0538	15.3409	TISSUE SPECIFICITY: Brain.	1.03758	0.176337	1.47421		1.78742	P22676	23	Calretinin	CALB2
14.2394	14.1398	15.8366	16.7966	14.3817	16.0175	13.8078	13.8002	15.4867	16.072	14.1943	13.3143	13.0148	13.2785	13.6268	13.565	13.9941	10.8873	13.224	TISSUE SPECIFICITY: Expressed in all tissues tested with highest expression in skeletal muscle and lowest in brain. {ECO:0000269|PubMed:7540613}.	2.44503	0.0190974	1.75621	+	3.37606	Q13137;Q13137-3;Q13137-4	15	Calcium-binding and coiled-coil domain-containing protein 2;Isoform 3 of Calcium-binding and coiled-coil domain-containing protein 2;Isoform 4 of Calcium-binding and coiled-coil domain-containing protein 2	CALCOCO2
17.4675	13.8639	15.7345	19.0966	18.1414	20.2555	13.5664	16.1294	15.0918	13.2744	16.3125	16.9941	13.5541	14.1538	14.9112	14.2473	14.4125	15.8338	16.0683	NA	1.05099	0.172178	1.58719		1.80436	C9J813	4	Caldesmon (Fragment)	CALD1
21.0247	19.5962	20.3814	21.6825	19.8847	21.4612	19.9506	20.8632	19.3892	21.7472	21.0043	20.8491	21.4173	20.6243	20.2142	20.1699	19.2135	20.473	21.5568	NA	0.13077	0.812647	0.12871		0.337331	P0DP23;P0DP24;P0DP25	41	Calmodulin-1;Calmodulin-2;Calmodulin-3	CALM1
15.6547	15.8545	15.5793	16.6898	16.7171	19.2578	16.7748	15.8457	17.3655	16.8202	15.4734	14.7121	13.8766	16.4473	16.0579	15.2608	15.4318	16.2766	15.578	TISSUE SPECIFICITY: Expressed in breast cancer cell lines. {ECO:0000269|PubMed:12747765}.	0.91705	0.217435	0.834109		1.63208	Q96GE6	14	Calmodulin-like protein 4	CALML4
19.3183	20.3745	19.8788	19.773	18.6867	20.4103	19.5016	19.1726	19.2344	20.0124	18.817	20.0785	19.8381	18.8785	19.0804	18.5643	19.4596	19.6393	19.3257	NA	0.734495	0.295022	0.349711		1.3839	P27797	94	Calreticulin	CALR
15.8725	15.7847	15.606	16.6761	15.8807	17.2745	16.766	14.6526	15.3185	15.6219	14.803	16.3152	15.7075	13.8857	13.6968	13.4408	13.4092	15.5421	14.8722	TISSUE SPECIFICITY: Ubiquitously expressed. Expressed at high levels in heart, placenta and skeletal muscle, at lower levels in lung, kidney and pancreas and at very low levels in brain and liver.	2.75622	0.0121949	1.51607	+	3.70648	O43852-2;O43852-4	5	Isoform 2 of Calumenin;Isoform 4 of Calumenin	CALU
13.5448	11.1908	13.075	12.6941	12.7357	14.3005	13.1018	12.6694	15.3144	12.4401	12.7367	13.1669	13.3712	12.2598	11.902	13.3467	13.0936	11.2271	13.7067	TISSUE SPECIFICITY: Widely expressed. Expressed in cells of the zona glomerulosa of the adrenal cortex. {ECO:0000269|PubMed:12193581, ECO:0000269|PubMed:17056143}.	0.370966	0.545143	0.379859		0.816278	Q14012	3	Calcium/calmodulin-dependent protein kinase type 1	CAMK1
14.2015	14.1047	14.3505	13.6913	15.4212	16.2672	15.7318	15.9626	16.4616	15.5221	16.0542	15.2388	15.0132	15.1259	14.9861	14.7759	14.9039	14.2742	15.5804	TISSUE SPECIFICITY: Widely expressed. Highly and mostly expressed in polymorphonuclear leukocytes (neutrophilic and eosinophilic granulocytes) while little or no expression is observed in monocytes and lymphocytes. {ECO:0000269|PubMed:11050006, ECO:0000269|PubMed:12935886, ECO:0000269|PubMed:15840691}.	0.360709	0.554195	0.299245		0.798128	Q8IU85;Q8IU85-2	12	Calcium/calmodulin-dependent protein kinase type 1D;Isoform 2 of Calcium/calmodulin-dependent protein kinase type 1D	CAMK1D
16.1626	17.2234	18.0766	17.2936	16.5548	16.3879	17.5548	16.9777	18.2121	19.0631	17.0662	16.3516	17.6147	15.3737	16.9643	16.3812	16.9307	17.2129	17.0116	TISSUE SPECIFICITY: Expressed in cardiac muscle and skeletal muscle. Isoform Delta 3, isoform Delta 2, isoform Delta 8 and isoform Delta 9 are expressed in cardiac muscle. Isoform Delta 11 is expressed in skeletal muscle. {ECO:0000269|PubMed:10189359, ECO:0000269|PubMed:16690701}.	0.593131	0.374458	0.459549		1.17757	Q13557-10;Q13557-6	23	Isoform Delta 10 of Calcium/calmodulin-dependent protein kinase type II subunit delta;Isoform Delta 9 of Calcium/calmodulin-dependent protein kinase type II subunit delta	CAMK2D
14.7851	15.4948	13.9802	16.2229	14.9347	17.0005	15.344	14.6382	15.4624	13.1769	14.6152	14.884	14.4656	14.7189	14.9623	14.7455	13.7413	15.4943	15.6484	NA;TISSUE SPECIFICITY: Expressed in skeletal muscle. {ECO:0000269|PubMed:16690701}.	0.216704	0.705705	0.219722		0.523844	A0A2Q3DQE3;Q13555;Q13555-10;Q13555-11;Q13555-2;Q13555-3;Q13555-4;Q13555-5;Q13555-6;Q13555-7;Q13555-8;Q13555-9;Q5SWX3	8	Calcium/calmodulin-dependent protein kinase (CaM kinase) II gamma, isoform CRA_d;Calcium/calmodulin-dependent protein kinase type II subunit gamma;Isoform 10 of Calcium/calmodulin-dependent protein kinase type II subunit gamma;Isoform 11 of Calcium/calmodulin-dependent protein kinase type II subunit gamma;Isoform 2 of Calcium/calmodulin-dependent protein kinase type II subunit gamma;Isoform 3 of …	CAMK2G
13.6682	14.1171	13.8057	14.581	13.0732	12.1869	14.3947	13.0109	13.9568	10.9637	13.6353	14.8107	10.845	11.1079	12.7905	12.4561	13.0112	10.7274	14.0414	TISSUE SPECIFICITY: Expressed in brain, thymus, CD4 T-cells, testis and epithelial ovarian cancer tissue. {ECO:0000269|PubMed:12065094, ECO:0000269|PubMed:7961813, ECO:0000269|PubMed:8397199}.	1.64799	0.0656851	1.3771	+	2.50982	Q16566	3	Calcium/calmodulin-dependent protein kinase type IV	CAMK4
12.9162	12.7748	12.8041	12.5774	13.1714	7.30298	12.5165	12.3609	12.7347	11.8433	12.5695	11.7614	11.2132	11.7926	12.4467	11.6114	11.9465	11.0379	2.61078	TISSUE SPECIFICITY: Ubiquitous. Highest levels in brain, testis and ovary.	0.825748	0.252988	1.73123		1.51016	P49069	5	Calcium signal-modulating cyclophilin ligand	CAMLG
19.351	15.2836	18.6605	20.9457	14.4257	16.875	14.9218	16.2452	14.4812	18.9409	13.6084	16.5991	17.6286	14.781	14.6329	15.8054	13.0645	18.9251	14.2398	NA;TISSUE SPECIFICITY: Expressed in bone marrow and testis and neutrophils.	0.511908	0.428969	1.11236		1.05166	J3KNB4;P49913	13	Cathelicidin antimicrobial peptide	CAMP
14.0378	14.9673	15.3443	17.6058	13.836	15.6274	14.3241	13.8805	14.427	15.5042	13.8651	13.8545	11.3006	14.7444	13.6711	13.8334	14.8952	14.2458	10.238	NA	1.42362	0.0930704	1.49733	+	2.25372	Q9P1Y5;Q9P1Y5-2	13	Calmodulin-regulated spectrin-associated protein 3;Isoform 2 of Calmodulin-regulated spectrin-associated protein 3	CAMSAP3
15.8796	16.7204	17.0827	17.3045	15.6164	18.1348	17.2307	16.1006	18.0677	17.5545	16.8087	15.2181	12.2867	15.257	15.6448	15.6515	14.9871	15.2743	15.389	TISSUE SPECIFICITY: Widely expressed. {ECO:0000269|PubMed:12234496}.	2.87071	0.0103075	1.88268	+	3.8279	Q8WVQ1;Q8WVQ1-3	16	Soluble calcium-activated nucleotidase 1;Isoform 3 of Soluble calcium-activated nucleotidase 1	CANT1
18.7225	17.7936	18.7061	18.8985	18.3884	17.8271	17.4191	17.6983	17.6381	19.5934	17.7164	18.2506	17.4179	17.025	16.3961	16.1482	16.1869	16.8722	16.9968	NA	4.20033	0.00134857	1.50058	+	5.26603	P27824;P27824-2	86	Calnexin;Isoform 2 of Calnexin	CANX
19.4135	20.6679	19.1299	21.0943	19.3935	22.0813	19.8239	19.7661	19.9631	20.683	19.5973	19.943	20.2409	20.1126	20.0785	19.4847	20.4176	20.3853	20.0671	NA	0.0179195	0.97163	0.0173409		0.0514349	Q01518	86	Adenylyl cyclase-associated protein 1	CAP1
14.5518	14.8351	14.7825	16.9262	14.7404	16.0479	14.8305	13.0646	14.8365	15.8165	13.7211	15.3937	14.3596	11.5984	13.853	14.5724	14.1514	14.6259	16.2369	NA	0.735429	0.294717	0.762577		1.38521	P40123	18	Adenylyl cyclase-associated protein 2	CAP2
17.4103	17.1139	18.5164	18.5245	18.43	18.9956	16.2466	17.3418	16.5562	18.6876	17.3742	16.0831	17.4888	17.0119	16.4909	16.0872	17.0872	18.012	17.184	TISSUE SPECIFICITY: Macrophages and macrophage-like cells.	0.682215	0.322473	0.55497		1.30926	P40121	33	Macrophage-capping protein	CAPG
17.0084	17.3223	17.5223	18.2394	16.3922	19.0486	17.0501	17.0002	17.5273	17.9756	17.6712	16.6006	17.6917	17.0477	16.3948	16.718	17.5957	17.3721	17.0379	TISSUE SPECIFICITY: Ubiquitous.	0.50673	0.432925	0.323963		1.04342	P17655	58	Calpain-2 catalytic subunit	CAPN2
14.4244	15.5181	13.2908	15.3157	14.382	16.0127	15.4449	15.308	16.42	14.8699	15.7876	13.7587	11.9195	14.1209	14.5053	14.15	13.9038	14.8479	14.2672	NA;TISSUE SPECIFICITY: Expressed in many tissues. Strong expression in the photoreceptor cells of the retina, with a punctate pattern of labeling over the nuclei and inner segments with less expression along the other segments and outer plexiform layer. {ECO:0000269|PubMed:23055945}.	1.58357	0.0720093	1.08517	+	2.43713	E7EV01;O15484	30	Calpain-5	CAPN5
12.9632	13.8372	14.5381	13.1745	13.9149	13.5702	13.4801	13.66	14.2176	15.2303	13.3222	13.4317	10.4166	13.585	14.0218	13.4631	13.388	13.6166	12.7908	TISSUE SPECIFICITY: Ubiquitous.	1.01469	0.183441	0.738057		1.75836	Q9Y6W3	9	Calpain-7	CAPN7
11.1183	13.5188	12.2331	12.7102	11.4465	12.6644	13.4366	11.8529	13.5262	12.4533	12.2851	12.6697	14.1245	11.3332	12.6665	12.349	12.6858	10.2544	11.1061	TISSUE SPECIFICITY: Expressed predominantly in stomach.	0.416808	0.5038	0.418684		0.89556	O14815	13	Calpain-9	CAPN9
18.4511	17.6351	19.569	19.7228	19.0469	19.3536	19.1073	19.1974	19.2876	20.849	19.3349	18.744	18.8391	17.9979	17.8327	17.9538	18.1038	18.4076	19.2664	NA	1.71227	0.0592912	0.848503	+	2.58178	A0A0C4DGQ5;P04632	35	Calpain small subunit 1	CAPNS1
17.6001	17.5844	18.1761	18.6436	18.0843	19.5741	16.8761	17.3489	16.8349	18.523	16.5395	16.5393	16.3769	17.1765	17.4557	16.8056	17.3239	16.8245	16.913	TISSUE SPECIFICITY: Ubiquitous.	1.12831	0.150334	0.711409		1.9008	Q14444;Q14444-2	33	Caprin-1;Isoform 2 of Caprin-1	CAPRIN1
14.8176	14.6032	18.4971	13.0145	11.7348	19.0552	14.7506	11.5246	14.3442	14.4396	14.0205	17.018	18.875	13.084	13.0665	14.1921	15.6747	14.0764	13.5988	NA	0.0560175	0.914386	0.165808		0.154562	Q13938;Q13938-4	9	Calcyphosin;Isoform 3 of Calcyphosin	CAPS
16.8871	17.2569	15.3297	15.8765	16.6341	17.9689	16.6748	16.8311	16.6412	15.0604	16.6274	16.3563	16.7397	16.6245	16.0014	15.9167	17.1427	16.8177	16.0639	NA	0.0427279	0.934445	0.0396672		0.119474	P52907	24	F-actin-capping protein subunit alpha-1	CAPZA1
19.2599	18.7124	19.6234	19.6616	19.2463	20.0596	19.4416	19.7919	19.6582	19.3206	19.8592	18.3939	19.0127	18.6905	18.4229	18.4793	19.5963	18.864	19.3417	NA	1.44912	0.0893989	0.503685	+	2.28327	P47755	20	F-actin-capping protein subunit alpha-2	CAPZA2
18.2631	17.6698	18.6986	18.3393	16.8561	19.2865	17.6254	17.8295	18.4852	18.5864	17.9325	17.6656	17.6686	17.7368	17.4994	17.5768	18.5741	17.708	17.7337	NA	0.609382	0.364422	0.317835		1.20205	P47756-2	41	Isoform 2 of F-actin-capping protein subunit beta	CAPZB
15.6697	14.8091	15.5304	14.2521	14.3217	16.8813	14.4075	14.2727	15.6024	15.6774	14.7683	13.9566	14.9554	13.0918	14.43	13.5389	14.5552	14.5407	13.4795	TISSUE SPECIFICITY: Widely expressed. Expressed at higher level in placenta, spleen, lymph node and bone marrow. Weakly or not expressed in thymus. {ECO:0000269|PubMed:11432859, ECO:0000269|PubMed:11536016}.	1.56145	0.0746709	0.927947	+	2.41202	Q5EG05;Q5EG05-2	5	Caspase recruitment domain-containing protein 16;Isoform 2 of Caspase recruitment domain-containing protein 16	CARD16
14.4087	14.449	15.8166	15.864	13.8058	13.546	13.0775	15.2845	13.0195	16.0696	15.3333	11.5604	10.5394	12.6607	10.6553	10.6341	10.5422	12.0137	11.8164	TISSUE SPECIFICITY: Expressed in ovary, testis, placenta, skeletal muscle, kidney, lung, heart and liver (at protein level). Expressed in thymus and brain. {ECO:0000269|PubMed:15637807}.	4.18467	0.00141573	3.08694	+	5.24855	Q96LW7-2	6	Isoform 2 of Caspase recruitment domain-containing protein 19	CARD19
12.9999	11.5855	12.7724	13.7367	12.4465	11.3642	12.3079	11.3234	12.3873	12.416	10.4988	12.6876	12.9105	12.2064	12.2453	12.435	10.8308	12.0127	11.0531	TISSUE SPECIFICITY: High expression in lung, ovary, testis and placenta (PubMed:11551959). Lower expression in heart, kidney and liver (PubMed:11551959). Also expressed in spleen, lymph node and bone marrow (PubMed:11821383). {ECO:0000269|PubMed:11551959, ECO:0000269|PubMed:11821383}.	0.275627	0.641298	0.254274		0.640923	Q9Y2G2;Q9Y2G2-4;Q9Y2G2-5	2	Caspase recruitment domain-containing protein 8;Isoform 4 of Caspase recruitment domain-containing protein 8;Isoform 5 of Caspase recruitment domain-containing protein 8	CARD8
15.8575	15.6337	16.561	17.1254	17.4836	17.5119	16.158	17.0314	17.2612	15.3982	16.7172	16.011	16.5148	16.4209	16.1309	15.3444	17.4438	17.1401	16.2662	NA	0.107276	0.844679	0.0966298		0.282286	Q9Y2V2	6	Calcium-regulated heat-stable protein 1	CARHSP1
17.1334	17.0361	15.2085	15.2028	16.1696	18.428	16.5056	15.6898	18.1663	16.0941	15.5086	16.325	16.6555	16.8016	16.632	16.4677	16.6067	17.5542	16.0597	TISSUE SPECIFICITY: Overexpressed in prostate adenocarcinomas and high-grade prostatic intraepithelial neoplasia. {ECO:0000269|PubMed:15221992}.	0.220653	0.700962	-0.226862		-0.531934	Q86X55;Q86X55-1	14	Histone-arginine methyltransferase CARM1;Isoform 1 of Histone-arginine methyltransferase CARM1	CARM1
15.2432	15.8487	15.5702	15.896	14.5738	15.5385	14.9843	15.0465	15.9591	15.9756	15.4277	13.629	16.3542	14.8081	14.9511	15.025	15.4485	14.6988	14.8129	TISSUE SPECIFICITY: Expressed in lung, placenta, small intestine, liver, thymus, colon, skeletal muscle, heart and brain. Higher expression in kidney. {ECO:0000269|PubMed:16054028}.	0.1989	0.725876	0.150777		0.486885	Q5VZK9	40	F-actin-uncapping protein LRRC16A	CARMIL1
11.951	12.7182	13.7469	15.8681	14.1913	15.1525	13.9161	12.9888	12.2464	14.4993	11.9282	14.6636	13.4755	13.7282	14.4432	13.7855	12.8473	14.9747	12.9176	TISSUE SPECIFICITY: Expressed at higher level in kidney. Expressed at lower level in brain and skeletal muscle. {ECO:0000269|PubMed:26001783}.	0.0555718	0.914843	-0.0829748		-0.153399	Q8N4J0	3	Carnosine N-methyltransferase	CARNMT1
15.6968	15.6243	15.3814	16.3319	15.8508	16.9916	15.0973	15.0128	15.9678	15.968	15.2691	15.7631	15.4568	16.0956	15.1702	15.1521	15.535	15.6702	15.6182	NA	0.448554	0.47885	0.217954		0.94884	P49589-3	37	Isoform 3 of Cysteine--tRNA ligase, cytoplasmic	CARS1
15.2828	15.674	16.6379	17.8247	16.4978	16.905	15.2554	15.0701	18.1476	17.3919	15.1572	16.2394	14.7974	16.6112	14.3964	15.4752	13.6911	15.692	14.7956	NA	1.71993	0.0584958	1.27474	+	2.59032	Q9HA77	12	Probable cysteine--tRNA ligase, mitochondrial	CARS2
11.8104	10.9376	13.8667	12.5327	12.4514	15.385	12.3583	11.6895	12.5594	12.6983	12.4883	11.8511	12.1613	11.8145	11.2042	10.9391	11.7639	12.5698	11.1436	TISSUE SPECIFICITY: Widely expressed. Overexpressed in breast cancers and metastasis, as well as in gastric cancers. {ECO:0000269|PubMed:12080473}.	1.14542	0.146079	0.895765		1.92189	O15234	5	Protein CASC3	CASC3
14.7964	14.3589	16.8778	17.0895	14.7039	15.8327	14.8467	15.796	15.5595	16.7888	15.4981	14.4782	14.6072	14.8215	14.7268	14.6631	15.6039	15.1088	14.733	NA;TISSUE SPECIFICITY: Ubiquitous. Expression is significantly greater in brain relative to kidney, lung, and liver and in fetal brain and kidney relative to lung and liver. {ECO:0000269|PubMed:11003712}.	0.989239	0.192288	0.657292		1.72582	A0A2R8YE77;A0A2U3TZM1;O14936;O14936-3	37	Calcium/calmodulin-dependent serine protein kinase (MAGUK family), isoform CRA_c;Peripheral plasma membrane protein CASK;Peripheral plasma membrane protein CASK;Isoform 3 of Peripheral plasma membrane protein CASK	CASK
13.4962	12.189	14.0455	14.4827	13.1012	13.7369	11.7063	12.6347	12.4666	12.5884	13.2374	12.4001	12.7689	12.4856	12.1068	12.5083	11.3592	12.6162	11.9494	NA	1.36659	0.101524	0.750757	+	2.18718	Q8WXE0;Q8WXE0-2	5	Caskin-2;Isoform 2 of Caskin-2	CASKIN2
15.7434	12.8235	13.0516	12.5889	13.5964	13.7715	13.085	16.1645	14.5	13.6783	14.8704	10.0229	12.0716	10.5264	12.0489	11.5976	11.8969	11.3431	11.8551	NA	2.28577	0.0238811	2.03807	+	3.20613	A0A1W2PRX7;Q5FBZ0	5	Caspase-1;CASP1 nirs variant 1	CASP1
14.0784	14.9205	14.5227	15.7796	14.2582	14.6883	14.5334	14.5148	15.8535	15.5099	13.6975	14.7596	14.1842	14.2578	14.7355	14.2626	13.2485	14.4061	13.0934	TISSUE SPECIFICITY: Detectable in most tissues. Lowest expression is seen in brain, kidney, prostate, testis and colon.	1.5373	0.0775058	0.73283	+	2.38452	Q92851-2;Q92851-4;Q92851-6	10	Isoform B of Caspase-10;Isoform D of Caspase-10;Isoform 6 of Caspase-10	CASP10
15.9959	14.0805	17.0395	17.3455	14.9675	15.7579	14.868	16.0706	14.5728	16.5885	15.2099	14.0713	14.2736	14.7622	14.092	13.776	15.4951	14.3157	13.9063	TISSUE SPECIFICITY: Highly expressed in lung, spleen, heart, liver and kidney. Moderate levels in brain and skeletal muscle, and low in testis. Also found in many cell lines, highest expression in cells of the immune system.	1.72577	0.0579715	1.17289	+	2.59682	P42574	15	Caspase-3	CASP3
14.9306	15.0503	14.4456	14.8883	13.5731	16.73	14.4305	12.8349	15.806	14.6391	13.2713	13.5386	14.3721	12.7163	12.1897	12.4093	12.4918	13.1747	13.5129	TISSUE SPECIFICITY: Widely expressed, including in keratinocytes and colonic and small intestinal epithelial cells (at protein level). Not detected in brain. {ECO:0000269|PubMed:10986288, ECO:0000269|PubMed:22246630, ECO:0000269|PubMed:25121752, ECO:0000269|PubMed:7743998, ECO:0000269|PubMed:7797510, ECO:0000269|PubMed:7797592}.	2.30357	0.0233588	1.53056	+	3.22516	P49662	5	Caspase-4	CASP4
11.9439	11.4968	15.1734	14.2084	12.4141	11.789	12.1216	11.6443	18.6642	12.7783	19.6357	10.3565	17.3236	15.3249	18.9087	17.7169	11.2614	10.5793	18.0658	TISSUE SPECIFICITY: Expressed in barely detectable amounts in most tissues except brain, highest levels being found in lung, liver and skeletal muscle. {ECO:0000269|PubMed:7797592}.	0.755585	0.284739	-2.07837		-1.41351	P51878;P51878-5	2	Caspase-5;Isoform 5 of Caspase-5	CASP5
14.72	14.1395	15.478	15.9113	14.2206	16.1723	15.2611	15.3121	15.8697	16.2996	14.576	14.0601	13.4533	14.8636	14.5487	14.2053	15.0726	13.931	14.734	NA	1.37649	0.0997161	0.767142	+	2.19878	P55212	17	Caspase-6	CASP6
14.7261	13.6423	15.7812	15.2477	14.5694	15.2291	14.2209	13.6448	14.9423	16.8131	15.1475	13.4556	14.3492	13.0327	13.0898	12.8774	13.2701	11.7841	13.6195	TISSUE SPECIFICITY: Highly expressed in lung, skeletal muscle, liver, kidney, spleen and heart, and moderately in testis. No expression in the brain.	2.83618	0.0109006	1.6389	+	3.79127	P55210;P55210-3	18	Caspase-7;Isoform Alpha' of Caspase-7	CASP7
13.8118	13.8907	13.6931	14.3107	14.6549	14.6185	13.4549	13.8897	15.8672	15.328	12.9811	12.6482	13.5503	12.6729	13.083	11.4841	11.2907	13.4923	12.7963	TISSUE SPECIFICITY: Isoform 1, isoform 5 and isoform 7 are expressed in a wide variety of tissues. Highest expression in peripheral blood leukocytes, spleen, thymus and liver. Barely detectable in brain, testis and skeletal muscle.	2.44307	0.0191857	1.4715	+	3.37397	Q14790;Q14790-2;Q14790-4;Q14790-9	16	Caspase-8;Isoform 2 of Caspase-8;Isoform 4 of Caspase-8;Isoform 9 of Caspase-8	CASP8
17.7654	18.7154	17.5959	18.1673	18.1523	19.0804	18.2628	18.0084	17.9921	18.7003	17.7792	16.7311	19.5821	18.6149	18.1731	17.568	15.7228	18.6361	18.4446	NA	0.0226076	0.963851	-0.0267463		-0.0645622	P04040	53	Catalase	CAT
13.2224	13.316	15.6897	14.5684	13.04	12.8954	14.3416	12.8077	14.7197	16.0586	13.7128	15.639	14.2167	12.4419	13.4233	14.6293	12.2799	13.2448	15.4556	NA;TISSUE SPECIFICITY: Skeletal muscle, liver, stomach, lung, kidney and heart (at protein level). Expressed in the brain. {ECO:0000269|PubMed:19262564}.	0.416535	0.503897	0.497392		0.895096	C9JKI3;Q03135-2	3	Caveolin (Fragment);Isoform 2 of Caveolin-1	CAV1
17.1728	15.2711	17.6063	18.7626	15.306	18.7808	17.3248	16.3972	16.5313	18.1216	17.5093	17.5705	16.9043	15.1355	16.5832	16.9585	16.2729	15.6544	18.6217	NA	0.554762	0.399391	0.606123		1.11885	Q6NZI2	34	Caveolae-associated protein 1	CAVIN1
16.2455	15.8724	15.4512	17.4263	12.9154	16.2386	16.5012	14.6378	15.8595	15.0184	15.3609	16.0093	16.5282	13.9733	15.0387	15.9436	14.488	14.445	17.1415	TISSUE SPECIFICITY: Highly expressed in heart and lung, and expressed at lower levels in brain, kidney, liver, pancreas, placenta, and skeletal muscle. {ECO:0000269|PubMed:10191091}.	0.196479	0.728759	0.262588		0.481799	O95810	18	Caveolae-associated protein 2	CAVIN2
14.2819	14.8653	16.4136	16.4608	14.645	17.7221	16.3154	15.9518	16.2099	17.0418	16.0081	16.2776	15.6948	13.4436	14.9519	14.9165	13.9721	14.8167	16.6893	TISSUE SPECIFICITY: Skeletal muscle, liver, stomach, lung, kidney and heart (at protein level). Strongly expressed in mammary and epithelial cells. {ECO:0000269|PubMed:11691816, ECO:0000269|PubMed:19262564}.	1.42471	0.0931219	1.08968	+	2.25499	Q969G5	19	Caveolae-associated protein 3	CAVIN3
10.3954	11.484	12.9203	13.4079	11.5495	11.0214	11.5948	11.091	13.3399	12.9699	12.3677	12.8162	7.61111	12.2637	8.34419	10.7854	12.562	10.2588	10.8344	TISSUE SPECIFICITY: Ubiquitously expressed in fetal and adult tissues. Highly expressed in adult brain, heart, lung, kidney, lymph node, appendix, thymus, testis, uterus, small intestine, prostate and thymus. {ECO:0000269|PubMed:10675041, ECO:0000269|PubMed:9447981, ECO:0000269|PubMed:9787195, ECO:0000269|PubMed:9790752}.	1.74104	0.0566934	1.69989	+	2.61382	O43439;O43439-2;O43439-3;O43439-4;O43439-5	2	Protein CBFA2T2;Isoform 2 of Protein CBFA2T2;Isoform 3 of Protein CBFA2T2;Isoform 4 of Protein CBFA2T2;Isoform 5 of Protein CBFA2T2	CBFA2T2
14.7554	13.7461	17.0058	15.6429	13.4433	14.5025	13.0567	15.005	14.015	14.7225	14.1003	14.3199	13.1378	13.3661	12.6909	12.8266	13.4264	12.7926	13.518	NA	2.49724	0.0178591	1.41793	+	3.4316	A0A494C0A9;Q13951;Q13951-2	10	Core-binding factor subunit beta;Core-binding factor subunit beta;Isoform 2 of Core-binding factor subunit beta	CBFB
13.607	12.0385	14.825	15.9121	13.4577	13.0904	11.7476	12.0018	12.9503	14.1624	12.424	14.7432	13.9075	11.6777	12.3402	11.5574	14.2874	14.1437	10.7149	NA	0.588425	0.37754	0.752086		1.17043	A0A0U1RQX8;A0A0U1RR39;A0A1B0GW38;P22681	9	E3 ubiquitin-protein ligase CBL;E3 ubiquitin-protein ligase CBL;E3 ubiquitin-protein ligase CBL (Fragment);E3 ubiquitin-protein ligase CBL	CBL
17.4578	18.4614	18.3094	17.4152	17.2014	19.3555	18.5755	17.8173	18.6232	17.1415	17.6678	17.0601	18.603	18.3207	18.3719	18.4368	18.416	18.0702	18.0524	TISSUE SPECIFICITY: Expressed in kidney (at protein level). {ECO:0000269|PubMed:1597188}.	0.752544	0.28615	-0.400612		-1.40926	P16152	32	Carbonyl reductase [NADPH] 1	CBR1
13.8507	16.8999	14.3578	15.1332	15.4329	16.6757	14.6691	15.0928	12.7515	13.7148	14.8306	14.6683	15.459	14.1166	15.3595	14.4888	15.4956	14.6378	14.1468	TISSUE SPECIFICITY: Detected in ovary, pancreas, intestine, colon, kidney, brain, thymus, lung, heart, liver, spleen, leukocyte, prostate and testis. {ECO:0000269|PubMed:18493841}.	0.0181015	0.971566	0.024893		0.051947	O75828	6	Carbonyl reductase [NADPH] 3	CBR3
13.1973	14.649	13.504	13.6623	13.2073	15.5672	15.2173	13.6677	12.2977	12.9097	13.8846	14.2263	14.6497	14.1712	14.7738	14.6874	14.3972	13.6894	14.6875	TISSUE SPECIFICITY: Detected in liver and kidney (at protein level) (PubMed:19000905). Displays the highest expression in neuronal and muscle tissues (PubMed:25203508). {ECO:0000269|PubMed:19000905, ECO:0000303|PubMed:25203508}.	0.886099	0.228945	-0.604076		-1.5912	Q8N4T8	8	Carbonyl reductase family member 4	CBR4
13.632	11.6243	12.8844	13.6053	14.0012	15.123	12.6837	13.1112	12.1862	13.1794	12.9309	11.0084	12.1503	13.0364	13.2152	11.37	12.8282	14.4801	10.3145	NA;TISSUE SPECIFICITY: Ubiquitously expressed. Up-regulated in cultured astrocytes treated with dopamine. {ECO:0000269|PubMed:15233989}.	0.423992	0.498031	0.512536		0.907727	A0A087X140;C9J3G2;Q8IUF1;Q9BRT8;Q9BRT8-2;Q9BRT8-3	4	COBW domain-containing protein 1;COBW domain-containing protein 2;COBW domain-containing protein 2;COBW domain-containing protein 1;Isoform 2 of COBW domain-containing protein 1;Isoform 3 of COBW domain-containing protein 1	CBWD1
15.8277	15.521	17.4795	16.7464	14.7557	19.9585	15.23	15.342	15.3103	15.7769	15.9699	16.0245	15.8542	14.6582	15.6269	15.5089	14.9656	11.6756	15.3276	NA;TISSUE SPECIFICITY: Expressed in all adult and embryonic tissues.	1.23074	0.126813	1.35942		2.02573	B5MD17;J3KS05;P83916	6	Chromobox protein homolog 1 (Fragment);Chromobox protein homolog 1 (Fragment);Chromobox protein homolog 1	CBX1
16.0215	16.0305	17.4453	15.5349	16.3105	17.9455	16.1504	16.0775	15.4625	15.1909	15.5745	16.9608	16.6008	17.0872	16.46	16.1992	17.1747	17.2102	16.0377	NA	0.685848	0.320509	-0.456005		-1.31451	Q13185	20	Chromobox protein homolog 3	CBX3
15.2402	14.5477	16.9074	17.651	15.4669	17.238	15.572	15.5811	15.9889	14.5737	14.2585	16.2283	15.3697	16.2354	15.6524	15.6144	15.1494	16.2123	15.3697	NA	0.0993655	0.853941	0.113513		0.263293	P45973	16	Chromobox protein homolog 5	CBX5
12.9186	10.736	13.6094	12.4691	12.6275	11.9575	10.9959	13.32	12.1353	13.5402	11.3756	11.8032	11.3907	12.6855	12.2795	12.3889	12.9169	11.2932	10.6144	NA	0.362774	0.552175	0.352264		0.801795	Q9HC52	4	Chromobox protein homolog 8	CBX8
14.6705	15.1603	16.4121	16.1426	15.2922	16.185	14.6964	14.7167	15.0266	15.6267	14.1999	13.9623	12.8699	14.4097	14.547	13.549	14.4193	13.4135	14.9927	NA	2.18318	0.0280932	1.14556	+	3.09613	Q6P1N0	37	Coiled-coil and C2 domain-containing protein 1A	CC2D1A
15.1812	11.7036	15.3547	14.3278	14.8537	15.2513	14.6027	14.9316	12.48	15.5899	14.4546	14.1744	15.4364	15.0063	15.2663	14.8069	14.9797	14.7361	14.8354	TISSUE SPECIFICITY: Widely distributed in brain and peripheral tissues. {ECO:0000269|PubMed:19423080}.	0.688731	0.318829	-0.600803		-1.31866	Q5T0F9;Q5T0F9-2	8	Coiled-coil and C2 domain-containing protein 1B;Isoform 2 of Coiled-coil and C2 domain-containing protein 1B	CC2D1B
16.0398	15.4452	16.6387	16.8054	16.2139	17.7202	15.7566	16.0092	16.238	17.4363	15.5749	15.9116	15.5931	16.3063	15.9657	16.0463	16.0522	16.239	15.6044	TISSUE SPECIFICITY: Expressed in various epithelial cancer cell lines, including breast, colon, prostate, pancreatic and leukemia. Expression is regulated by growth factors. {ECO:0000269|PubMed:12816952}.	0.617254	0.359035	0.343403		1.21384	Q8IX12;Q8IX12-2	48	Cell division cycle and apoptosis regulator protein 1;Isoform 2 of Cell division cycle and apoptosis regulator protein 1	CCAR1
17.3612	17.1951	18.8992	17.1916	17.8786	18.9666	17.3823	17.7504	17.156	18.9512	17.0922	16.872	17.2114	17.1163	17.7897	17.1326	17.9022	17.4259	17.3175	TISSUE SPECIFICITY: Expressed in gastric carcinoma tissue and the expression gradually increases with the progression of the carcinoma (at protein level). Expressed ubiquitously in normal tissues. Expressed in 84 to 100% of neoplastic breast, lung, and colon tissues. {ECO:0000269|PubMed:12370419, ECO:0000269|PubMed:24962073}.	0.477965	0.455653	0.311035		0.997125	Q8N163	57	Cell cycle and apoptosis regulator protein 2	CCAR2
11.9486	13.1625	15.0189	13.7862	11.4491	11.9416	11.9887	13.0493	14.3458	14.0279	11.3623	13.262	13.6812	10.4714	13.54	13.3288	11.353	11.9097	13.6717	NA	0.276818	0.640266	0.380096		0.643215	Q96A19	3	Coiled-coil domain-containing protein 102A	CCDC102A
13.9104	14.4156	14.6136	13.5867	13.4479	12.9574	14.0925	14.3483	15.3987	14.6813	11.3687	12.8965	11.3681	10.9998	10.1151	14.4894	13.7768	10.9157	12.4796	NA;TISSUE SPECIFICITY: Expressed throughout the brain. {ECO:0000269|PubMed:16378758}.	2.02623	0.0359325	1.78914	+	2.92671	F8WCZ3;Q96NT0	2	Coiled-coil domain-containing protein 115	CCDC115
13.6351	11.48	12.7522	13.8906	13.1583	12.04	11.7495	13.2389	12.7439	13.5123	13.5323	11.6927	11.3117	12.9652	12.883	12.195	12.7039	10.6766	12.4572	NA	0.829744	0.251288	0.615107		1.51558	Q8IWD4;Q8IWD4-2;Q8IWD4-3;Q8IWD4-4	2	Coiled-coil domain-containing protein 117;Isoform 2 of Coiled-coil domain-containing protein 117;Isoform 3 of Coiled-coil domain-containing protein 117;Isoform 4 of Coiled-coil domain-containing protein 117	CCDC117
13.8339	11.7381	16.2104	14.8091	15.071	14.6997	13.2996	14.3612	12.3342	15.5216	13.2791	10.8318	10.9278	13.0214	12.9685	12.411	13.3437	11.1618	12.5811	NA	1.39957	0.0966562	1.48741	+	2.22575	J3KR35;Q8WUD4	5	Coiled-coil domain containing 12, isoform CRA_a;Coiled-coil domain-containing protein 12	CCDC12
16.7474	15.9222	16.8379	18.035	16.308	17.7559	15.8332	16.2264	15.7964	16.7021	15.5407	15.9034	16.1257	16.1554	15.6684	15.5683	15.4554	16.4263	15.4154	TISSUE SPECIFICITY: Ubiquitously expressed. {ECO:0000269|PubMed:23894443}.	1.19475	0.13431	0.636685		1.98217	Q96CT7	20	Coiled-coil domain-containing protein 124	CCDC124
14.5294	10.9058	14.5445	14.8667	13.2676	16.978	15.8024	14.2335	13.184	14.6837	14.7263	15.9984	16.2325	13.1938	10.548	11.3967	11.4225	9.93226	9.73992	NA	2.16446	0.0289388	2.69587	+	3.076	Q96BQ5	4	Coiled-coil domain-containing protein 127	CCDC127
14.5975	15.1457	14.8569	14.6146	15.3661	15.1256	14.4474	14.8194	14.7979	15.2704	14.6902	13.9082	13.6658	13.3009	12.3872	13.2473	14.3787	12.6644	14.4011	highly expressed in activated CD8(+) T cells, and also expressed at lower levels in CD4(+) T cells (PubMed:25125657). {ECO:0000269|PubMed:18087676, ECO:0000269|PubMed:23070808, ECO:0000269|PubMed:25125657}.;TISSUE SPECIFICITY: Expressed in cervical gland, cervical squamous epithelium, endometrium, stomach, kidney distal convoluted tubule, spermatogenic cells in testis, mammary gland, liver and st…	4.05501	0.00180905	1.36827	+	5.10454	Q9H6E4	7	Coiled-coil domain-containing protein 134	CCDC134
12.2189	14.3691	14.1519	13.232	12.7825	11.9557	11.4183	12.5467	12.0349	15.3322	13.8345	11.2451	17.5069	12.8816	14.9232	15.6313	14.3037	13.6754	16.478	NA	2.27734	0.0241477	-2.13034	+	-3.19711	E9PFB9;J3KP97;Q5T9S5;Q5T9S5-2	2	Coiled-coil domain-containing protein 18;Coiled-coil domain-containing protein 18 (Fragment);Coiled-coil domain-containing protein 18;Isoform 2 of Coiled-coil domain-containing protein 18	CCDC18
13.4224	13.8295	14.2141	13.0955	14.351	14.9888	13.2251	13.153	12.0431	15.4185	13.0129	12.8212	12.4907	12.5986	12.6142	12.6563	12.9814	13.302	12.0444	NA	1.6365	0.0670728	0.961616	+	2.4969	Q7Z3E2	13	Coiled-coil domain-containing protein 186	CCDC186
15.3686	14.8548	16.3817	16.902	15.1767	15.8892	14.7962	15.1034	16.1305	15.4948	15.4134	13.8826	14.9811	14.3728	14.682	14.8246	14.584	14.3341	14.809	TISSUE SPECIFICITY: Widely expressed in adult tissues and in fetal liver and brain, with highest levels in prostate and lowest in skeletal muscle. {ECO:0000269|PubMed:21826058}.	1.6632	0.0639061	0.794116	+	2.52689	O60826	27	Coiled-coil domain-containing protein 22	CCDC22
15.3543	13.3858	15.655	16.1173	14.5388	18.5313	13.7929	14.4385	13.9609	14.9829	14.0759	11.2291	12.8411	11.8614	12.4452	13.8309	13.2405	12.8183	11.3738	NA	1.9815	0.0382239	2.04173	+	2.87811	Q86WR0	11	Coiled-coil domain-containing protein 25	CCDC25
14.155	14.5137	15.5213	12.7204	14.4137	16.5263	14.2361	13.7387	12.0834	14.8813	13.966	11.631	10.6006	13.3227	11.6473	11.3473	13.6568	6.92521	10.1675	NA	2.61151	0.0149593	2.93691	+	3.55298	Q86WV7;Q96MW1	7	CCDC43 protein;Coiled-coil domain-containing protein 43	CCDC43
15.3925	15.1994	15.0047	16.5076	15.4825	16.6488	15.6424	15.2175	15.7768	16.008	14.7799	15.8119	14.7919	15.2358	14.7028	14.0873	13.8411	13.8731	13.537	NA	3.73696	0.00287179	1.3271	+	4.75569	Q96A33	30	Coiled-coil domain-containing protein 47	CCDC47
12.3202	11.3014	14.1239	12.5703	14.4333	15.4732	12.5061	14.4779	12.4043	11.7145	14.0374	13.7063	13.8836	12.9398	12.2733	12.1505	12.7388	16.9434	10.7196	TISSUE SPECIFICITY: Isoform 1 and isoform 2 are coexpressed in placenta, liver, lung, kidney and pancreas. Only isoform 1 is detected in skeletal muscle, brain and heart. {ECO:0000269|PubMed:14527723}.	0.0820046	0.875762	0.162997		0.220728	Q8IVM0	6	Coiled-coil domain-containing protein 50	CCDC50
14.4403	12.8781	14.1027	14.1618	13.6611	13.2884	12.9237	13.2957	13.3227	14.9638	13.0698	12.6751	14.0467	13.3152	12.2855	13.1864	11.348	10.1316	12.5547	TISSUE SPECIFICITY: Isoform 1: Widely expressed (PubMed:31435016). Isoform 2: Expression is barely detectable (PubMed:31435016). {ECO:0000269|PubMed:31435016}.	1.64591	0.0658685	1.15554	+	2.50748	Q96ER9	13	Mitochondrial potassium channel	CCDC51
15.5376	16.4811	16.6212	16.5731	16.0975	17.843	16.4379	16.1633	16.2236	16.7748	15.3964	15.8406	15.6709	16.4616	16.0938	15.7198	16.808	16.3975	15.5543	NA	0.379212	0.537292	0.231668		0.830757	C9JQ41;H7C525;Q4VC31	8	Coiled-coil domain-containing protein 58;Coiled-coil domain-containing protein 58 (Fragment);Coiled-coil domain-containing protein 58	CCDC58
16.2858	16.305	17.4156	16.9884	16.1429	17.5241	16.026	15.9909	16.2579	17.7391	15.6837	15.2498	15.4162	15.7378	14.2703	15.6117	15.283	15.8367	15.5567	TISSUE SPECIFICITY: Ubiquitously expressed.	2.32746	0.0226157	1.07993	+	3.25069	Q16204	27	Coiled-coil domain-containing protein 6	CCDC6
15.3746	10.8153	15.4455	15.9346	14.1939	13.2771	11.5882	12.3112	15.9297	13.9248	12.1082	15.4409	14.6191	11.1798	12.8297	13.9154	12.5311	14.0545	15.1037	TISSUE SPECIFICITY: Expressed in endothelium (at protein level) (PubMed:21289099). Expressed in NK cells (at protein level) (PubMed:25762780). {ECO:0000269|PubMed:21289099, ECO:0000269|PubMed:25762780}.	0.207222	0.716062	0.400096		0.504259	A6NC98	19	Coiled-coil domain-containing protein 88B	CCDC88B
13.1081	12.1572	14.2773	13.081	12.9377	15.9134	12.3213	11.923	13.354	13.7817	11.8954	13.3191	13.0844	10.2518	11.2598	12.1041	11.9533	12.7738	12.115	NA	1.5747	0.0730504	1.23781	+	2.42707	Q9P219	19	Protein Daple	CCDC88C
14.4254	13.6331	13.2509	15.2828	13.2025	15.4457	13.5655	13.327	13.9924	13.4841	13.2222	14.2701	11.8751	13.4363	13.5263	12.9159	13.397	13.078	13.4859	NA	1.55158	0.0758092	0.823059	+	2.40079	A0A2R8Y4Z8	11	Coiled-coil domain-containing protein 9	CCDC9
13.8574	14.7456	15.0662	16.1006	14.5809	17.3818	14.8316	14.2139	14.904	15.4606	14.4715	14.2084	14.0929	13.1037	12.8873	14.3762	10.6455	14.168	13.3518	NA	2.46821	0.0185714	1.75304	+	3.40072	Q9GZT6;Q9GZT6-2	15	Coiled-coil domain-containing protein 90B, mitochondrial;Isoform 2 of Coiled-coil domain-containing protein 90B, mitochondrial	CCDC90B
13.3603	13.0297	14.3012	14.7801	12.8204	12.1755	13.2749	12.8232	11.9571	14.4097	13.5478	12.1231	13.8204	12.4292	10.757	10.6614	14.3663	13.2349	13.1913	NA;TISSUE SPECIFICITY: Widely expressed. {ECO:0000269|PubMed:12808037}.	0.525555	0.419404	0.579698		1.07325	A0A0A0MTK0;A0A0A0MTP0;Q7Z6B0;Q7Z6B0-2;Q7Z6B0-3	4	Coiled-coil domain-containing protein 91;Coiled-coil domain-containing protein 91;Coiled-coil domain-containing protein 91;Isoform 2 of Coiled-coil domain-containing protein 91;Isoform 3 of Coiled-coil domain-containing protein 91	CCDC91
15.6764	15.1123	16.1304	17.6639	15.0892	16.1829	15.3619	15.2476	15.7678	15.9403	15.2134	14.638	15.3493	14.6853	13.6968	14.4443	14.2977	15.0549	14.8409	NA	2.1941	0.0274254	1.04452	+	3.10786	F8W9X7;Q567U6	17	Coiled-coil domain-containing protein 93	CCDC93
15.8542	13.588	17.2482	17.2057	16.3658	12.8385	14.8824	15.5677	12.8204	13.2385	13.7755	15.0396	15.7389	16.0374	15.7769	15.1658	16.5347	17.1357	13.9636	NA	0.687231	0.319618	-0.89602		-1.3165	Q96F63	3	Coiled-coil domain-containing protein 97	CCDC97
11.9125	13.8777	12.7869	12.6753	11.9322	12.8217	11.7237	11.9678	11.7683	13.6386	11.8768	11.5295	10.6944	11.6854	11.5612	10.8578	10.6565	12.0674	10.6037	NA	2.61384	0.0149464	1.21501	+	3.55545	A0A2R8YEM2;P51946	3	Cyclin-H	CCNH
15.3689	13.9529	15.9522	15.3071	14.8785	11.826	13.6252	14.609	13.2525	14.9364	14.1408	10.229	11.7672	13.5101	12.0651	12.2709	13.7075	14.3738	10.603	NA;TISSUE SPECIFICITY: Widely expressed. Highest levels in testis. {ECO:0000269|PubMed:9632813}.	1.1475	0.145453	1.3926		1.92444	G3V5E1;O75909;O75909-1;O75909-4	7	Cyclin-K;Cyclin-K;Isoform 3 of Cyclin-K;Isoform 4 of Cyclin-K	CCNK
12.4178	3.66367	11.042	10.0367	13.0592	13.7068	10.2738	10.7668	11.3114	13.1275	11.5829	10.3541	9.24229	12.5663	12.6757	12.8056	12.3994	10.0862	11.5007	TISSUE SPECIFICITY: Ubiquitously expressed.	0.265437	0.652344	-0.665654		-0.621208	O60563	6	Cyclin-T1	CCNT1
14.3233	13.3719	14.2176	16.1532	14.256	12.0412	13.8717	13.052	12.0839	12.9526	11.2587	13.1021	13.1661	12.3347	11.8753	10.7886	13.1561	13.6639	10.1453	TISSUE SPECIFICITY: Widely expressed. {ECO:0000269|PubMed:18060517}.	1.19313	0.134683	1.22892		1.98021	Q8ND76;Q8ND76-2;Q8ND76-3	2	Cyclin-Y;Isoform 2 of Cyclin-Y;Isoform 3 of Cyclin-Y	CCNY
13.5929	11.1235	12.6592	13.5631	12.2365	12.8732	11.8679	11.5224	12.2	12.5917	12.2011	11.7267	13.2319	10.2118	11.185	9.85902	10.8752	10.2257	10.619	NA	2.45977	0.0187636	1.45972	+	3.39175	Q9ULG6;Q9ULG6-2;Q9ULG6-5	4	Cell cycle progression protein 1;Isoform 2 of Cell cycle progression protein 1;Isoform 5 of Cell cycle progression protein 1	CCPG1
16.1912	16.7152	17.521	16.1007	15.596	19.9152	16.3712	16.1939	16.6319	17.6776	16.1737	16.1215	16.624	16.2184	16.4207	16.2905	16.1451	15.9038	17.0441	NA;TISSUE SPECIFICITY: Ubiquitous.	0.393669	0.523859	0.389305		0.855906	J3KNF4;O14618	10	Copper chaperone for superoxide dismutase	CCS
19.0115	18.5327	19.1235	19.4111	18.5442	19.5693	18.4764	18.6257	18.4501	20.326	18.4042	18.651	18.5992	19.3273	18.3842	18.4971	18.8428	18.5392	18.4806	NA	0.522104	0.421199	0.259944		1.06781	P78371	76	T-complex protein 1 subunit beta	CCT2
17.6998	17.2311	17.7016	18.478	16.8051	18.2881	16.8813	17.1748	16.9637	18.0439	16.8442	16.6575	16.6933	17.4444	16.4233	16.9048	16.8719	16.8859	16.8766	NA	1.26609	0.119424	0.525972		2.06818	P49368	74	T-complex protein 1 subunit gamma	CCT3
18.5581	18.6585	19.7707	19.0106	18.0421	21.089	18.4308	18.3666	18.3408	19.2341	18.0586	18.9937	18.9664	19.3743	18.3842	18.6745	18.6374	18.8342	18.4372	NA	0.138012	0.804333	0.121149		0.353907	P50991	62	T-complex protein 1 subunit delta	CCT4
18.7274	18.3835	18.5196	18.184	18.1802	19.9236	18.3343	18.1074	18.3231	18.489	17.8705	18.4941	18.3732	18.9998	18.0321	18.2883	18.2909	18.3759	18.2031	NA	0.179261	0.751832	0.095204		0.445162	P48643	74	T-complex protein 1 subunit epsilon	CCT5
19.2948	19.3016	19.9688	18.7529	19.1948	21.1026	18.9556	19.1764	18.4381	19.1504	18.4152	19.0874	19.2604	19.8835	18.5912	19.0088	19.5566	19.4253	18.4303	NA	0.085198	0.872832	0.0713865		0.228651	P40227	54	T-complex protein 1 subunit zeta	CCT6A
15.1175	14.8178	16.3478	17.3828	13.4346	13.9309	11.7204	14.1174	14.2076	16.0664	13.6675	14.1406	11.7763	12.9278	12.4239	13.4374	13.3786	11.9005	10.9169	TISSUE SPECIFICITY: Testis-specific. {ECO:0000269|PubMed:8812458}.	2.52344	0.0171661	2.18478	+	3.45945	Q92526-3	2	Isoform 3 of T-complex protein 1 subunit zeta-2	CCT6B
17.4833	17.7816	18.6175	20.5177	17.753	19.3851	17.6458	18.0407	17.7133	17.0925	17.2709	17.1073	17.7713	18.5513	17.2261	17.2429	17.7635	17.608	16.7661	NA	0.558638	0.397169	0.472736		1.12484	Q99832	58	T-complex protein 1 subunit eta	CCT7
19.484	19.515	19.4803	19.3884	18.974	20.7125	18.9754	19.1064	18.9291	19.3142	18.6896	19.2871	19.1051	19.9313	19.0655	19.1826	19.3841	19.5304	19.1886	NA	0.0327272	0.948805	-0.0197691		-0.0924616	P50990	76	T-complex protein 1 subunit theta	CCT8
15.1004	13.5062	14.9995	15.4375	15.6125	15.3386	13.528	13.5253	11.9023	14.8909	14.3629	13.287	14.5143	14.0831	13.2373	13.5134	13.2631	13.5052	13.5794	NA	0.722278	0.301764	0.620113		1.36662	P86790;P86791	7	Vacuolar fusion protein CCZ1 homolog B;Vacuolar fusion protein CCZ1 homolog	CCZ1B
14.0467	13.3788	16.0654	17.2968	13.6502	14.6953	13.9168	13.8246	12.0457	14.7094	14.6267	14.0344	14.5864	12.5061	13.6655	13.95	13.222	15.1767	14.4782	TISSUE SPECIFICITY: Widely expressed with high level in uterus, aorta, heart, lung, trachea, placenta and in fetal heart, kidney, liver, spleen and lung. Expressed by CD34(+) acute myeloid leukemia cell lines, T-cell lines, activated T-lymphoblasts, endothelial cells and activated platelets. Isoform 4 is expressed in placenta. Isoform 1 is expressed in keratinocytes and placenta. {ECO:0000269|Pub…	0.325283	0.589006	0.416884		0.734183	Q6YHK3;Q6YHK3-4	12	CD109 antigen;Isoform 4 of CD109 antigen	CD109
15.8149	14.7423	17.2864	16.6335	14.9299	17.3801	15.6327	14.5627	16.4012	17.8625	15.4693	14.9691	16.8341	14.3142	14.4769	14.8161	14.1567	14.561	15.1027	also expressed by most tissue macrophages. {ECO:0000269|PubMed:1698311, ECO:0000269|PubMed:25497142}.;TISSUE SPECIFICITY: Detected on macrophages (at protein level) (PubMed:1698311). Expressed strongly on the surface of monocytes and weakly on the surface of granulocytes	1.33825	0.106094	1.07915	+	2.15386	P08571	12	Monocyte differentiation antigen CD14	CD14
14.2496	15.3323	15.6704	16.7264	15.518	14.3124	15.8982	14.8691	16.1743	16.4666	14.2641	13.2367	13.473	14.29	13.9616	14.1568	13.2503	14.1285	14.3293	NA;TISSUE SPECIFICITY: Expressed in a variety of tissues including vascular endothelium and epidermis. Expressed on erythroid cells, with a higher level of expression in erythroid precursors than on mature erythrocytes. {ECO:0000269|PubMed:15265795}.	2.14661	0.0297414	1.28513	+	3.05678	E9PMR4;K4DIA7;P48509	8	Tetraspanin;Tetraspanin (Fragment);CD151 antigen	CD151
15.56	15.9025	13.1916	13.0786	13.4335	17.6339	16.584	14.1322	17.2592	14.3127	15.4594	15.5626	18.1666	14.535	16.1173	15.1605	14.6389	16.0204	15.4499	NA;TISSUE SPECIFICITY: Expressed in monocytes and mature macrophages such as Kupffer cells in the liver, red pulp macrophages in the spleen, cortical macrophages in the thymus, resident bone marrow macrophages and meningeal macrophages of the central nervous system. Expressed also in blood. Isoform 1 is the lowest abundant in the blood. Isoform 2 is the lowest abundant in the liver and the spleen…	0.361746	0.553405	-0.5511		-0.79997	C9JHR8;F5GZZ9;Q86VB7;Q86VB7-2;Q86VB7-3;Q86VB7-4	16	Scavenger receptor cysteine-rich type 1 protein M130;Scavenger receptor cysteine-rich type 1 protein M130;Scavenger receptor cysteine-rich type 1 protein M130;Isoform 2 of Scavenger receptor cysteine-rich type 1 protein M130;Isoform 3 of Scavenger receptor cysteine-rich type 1 protein M130;Isoform 4 of Scavenger receptor cysteine-rich type 1 protein M130	CD163
13.6224	14.8529	11.1345	12.7539	11.4679	11.7991	16.3891	12.6689	15.4022	12.5914	13.232	15.2469	17.6559	13.3125	14.4953	13.7646	13.8608	15.7741	16.2817	TISSUE SPECIFICITY: Isoform 1 is highly expressed in the spleen, lymph nodes, thymus, and fetal liver and weakly expressed in bone marrow and no expression was found in peripheral blood leukocytes. Isoform 1 expression is restricted to the monocyte and macrophage cell lines. Isoform 2 is only expressed in spleen. {ECO:0000269|PubMed:11086079}.	1.22269	0.128514	-1.5906		-2.01602	Q9NR16;Q9NR16-2;Q9NR16-4	14	Scavenger receptor cysteine-rich type 1 protein M160;Isoform 2 of Scavenger receptor cysteine-rich type 1 protein M160;Isoform 4 of Scavenger receptor cysteine-rich type 1 protein M160	CD163L1
14.8039	12.6379	13.6083	12.769	11.2294	8.36195	16.5551	12.7933	16.7342	15.1615	15.6482	16.2766	14.4501	11.9221	15.0079	14.5921	12.1079	10.777	16.1436	NA;TISSUE SPECIFICITY: Predominantly expressed in dendritic cells and in DC-residing tissues. Also found in placental macrophages, endothelial cells of placental vascular channels, peripheral blood mononuclear cells, and THP-1 monocytes. {ECO:0000269|PubMed:11257134, ECO:0000269|PubMed:11337487}.	0.106843	0.844741	0.310056		0.281255	M0QZG5;Q9NNX6;Q9NNX6-10;Q9NNX6-12;Q9NNX6-2;Q9NNX6-5;Q9NNX6-6;Q9NNX6-7	6	CD209 antigen;CD209 antigen;Isoform 10 of CD209 antigen;Isoform 12 of CD209 antigen;Isoform 2 of CD209 antigen;Isoform 5 of CD209 antigen;Isoform 6 of CD209 antigen;Isoform 7 of CD209 antigen	CD209
14.3366	12.4196	12.6113	13.0769	12.6837	13.6763	12.7832	12.5437	13.7454	13.5649	13.2002	12.9214	11.543	11.4076	11.5819	11.3025	10.3261	12.1373	9.92264	TISSUE SPECIFICITY: CD3Z is expressed in normal lymphoid tissue and in peripheral blood mononuclear cells (PBMCs) (PubMed:11722641). {ECO:0000269|PubMed:11722641}.	5.04244	0.000373333	1.95584	+	6.23437	P20963;P20963-3	3	T-cell surface glycoprotein CD3 zeta chain;Isoform 3 of T-cell surface glycoprotein CD3 zeta chain	CD247
12.354	12.2121	12.5889	13.0695	13.5457	14.8731	15.6292	12.1806	12.0295	13.1831	11.7539	11.1339	15.7827	13.6546	15.7624	13.9564	10.8406	15.7352	16.5675	TISSUE SPECIFICITY: Expressed in tumor endothelial cells but absent or barely detectable in normal endothelial cells. Expressed in metastatic lesions of the liver and during angiogenesis of corpus luteum formation and wound healing. Expressed in vascular endothelial cells of malignant tumors but not in normal blood vessels. Expressed in stromal fibroblasts. {ECO:0000269|PubMed:10947988, ECO:00002…	1.48659	0.0843447	-1.73474	+	-2.32646	Q9HCU0	3	Endosialin	CD248
18.2949	18.003	17.9672	18.4225	17.8015	19.4835	17.5108	17.8131	18.0529	19.0318	17.5663	16.8343	16.5213	17.1115	17.3765	17.3263	18.3201	17.2059	16.8458	TISSUE SPECIFICITY: Widely expressed in fetal and adult tissues.	1.77213	0.0539846	0.82121	+	2.64833	Q9Y5K6	43	CD2-associated protein	CD2AP
13.1438	14.8155	14.9006	9.05741	13.9054	17.9112	15.8734	13.1849	12.4996	13.5824	11.4332	15.9857	10.1063	13.198	9.96025	13.287	14.0003	10.2366	11.6274	NA	1.26332	0.120073	2.08406		2.06485	O95400	8	CD2 antigen cytoplasmic tail-binding protein 2	CD2BP2
14.6569	11.5305	15.431	14.6266	12.9838	17.0443	12.5691	11.195	13.1562	13.6347	13.2665	14.5501	13.4134	11.9118	13.1702	13.3075	10.0852	13.0111	14.5426	NA;TISSUE SPECIFICITY: Selectively expressed on hematopoietic progenitor cells and the small vessel endothelium of a variety of tissues.	0.649983	0.340015	0.942981		1.26231	P28906;Q5JTA5	3	Hematopoietic progenitor cell antigen CD34	CD34
15.3125	15.9895	15.3016	13.2467	13.7344	16.7538	16.7002	14.5272	16.5464	15.6959	15.6759	14.6967	16.334	13.3148	16.168	13.9267	13.3037	14.8929	14.609	NA	0.644333	0.342772	0.698524		1.254	E7EU05;P16671	8	Platelet glycoprotein 4 (Fragment);Platelet glycoprotein 4	CD36
16.1889	13.877	15.5203	14.9257	14.7945	15.5794	15.8928	15.963	16.0065	17.3878	15.2665	17.9294	14.9136	14.0511	14.5296	14.9131	13.6211	14.076	13.1929	TISSUE SPECIFICITY: Expressed at high levels in pancreas, liver, kidney, brain, testis, ovary, placenta, malignant lymphoma and neuroblastoma. {ECO:0000269|PubMed:9074508}.	2.54908	0.016521	1.59231	+	3.48669	P28907	14	ADP-ribosyl cyclase/cyclic ADP-ribose hydrolase 1	CD38
17.937	18.3892	18.2101	19.4939	17.9322	19.1299	17.1739	18.1403	17.8539	19.139	17.7623	17.2651	17.648	17.0475	17.083	16.7656	16.8548	17.3985	16.9735	TISSUE SPECIFICITY: Isoform 10 (epithelial isoform) is expressed by cells of epithelium and highly expressed by carcinomas. Expression is repressed in neuroblastoma cells.	2.78506	0.011727	1.09213	+	3.73706	P16070;P16070-10;P16070-11;P16070-12;P16070-13;P16070-14;P16070-16;P16070-17;P16070-18;P16070-3;P16070-4;P16070-5;P16070-6;P16070-7;P16070-8	21	CD44 antigen;Isoform 10 of CD44 antigen;Isoform 11 of CD44 antigen;Isoform 12 of CD44 antigen;Isoform 13 of CD44 antigen;Isoform 14 of CD44 antigen;Isoform 16 of CD44 antigen;Isoform 17 of CD44 antigen;Isoform 18 of CD44 antigen;Isoform 3 of CD44 antigen;Isoform 4 of CD44 antigen;Isoform 5 of CD44 antigen;Isoform 6 of CD44 antigen;Isoform 7 of CD44 antigen;Isoform 8 of CD44 antigen	CD44
15.5815	16.5742	16.2369	16.7681	15.3935	16.5125	15.6151	15.5998	15.3346	16.2607	15.8627	15.8283	14.4881	15.8642	14.3248	14.435	15.5774	15.1923	14.6305	TISSUE SPECIFICITY: Expressed by all cells except erythrocytes.	3.08197	0.00763006	1.03365	+	4.05225	P15529-2;P15529-3;P15529-4;P15529-5;P15529-6;P15529-7	8	Isoform B of Membrane cofactor protein;Isoform D of Membrane cofactor protein;Isoform F of Membrane cofactor protein;Isoform H of Membrane cofactor protein;Isoform J of Membrane cofactor protein;Isoform L of Membrane cofactor protein	CD46
17.459	18.4203	17.805	17.5833	17.9495	17.359	17.897	17.4182	18.1713	18.7731	16.9301	18.0753	18.427	17.785	16.217	17.3308	16.635	17.537	17.5529	TISSUE SPECIFICITY: Very broadly distributed on normal adult tissues, as well as ovarian tumors, being especially abundant in some epithelia and the brain.	0.922287	0.215653	0.465122		1.63896	Q08722	4	Leukocyte surface antigen CD47	CD47
15.0511	17.3351	16.9348	18.2969	15.0764	18.2414	15.1116	13.8344	17.3918	16.5265	13.9545	14.3993	11.7117	13.9261	14.6219	14.4929	16.303	16.2596	14.7528	NA;TISSUE SPECIFICITY: Expressed on the plasma membranes of all cell types that are in intimate contact with plasma complement proteins. It is also found on the surfaces of epithelial cells lining extracellular compartments, and variants of the molecule are present in body fluids and in extracellular matrix.	1.11073	0.154771	1.43168		1.87905	B1AP13;P08174-2	11	Complement decay-accelerating factor;Isoform 1 of Complement decay-accelerating factor	CD55
15.9876	16.614	16.527	16.5936	15.6196	11.9194	15.0585	15.5304	16.2019	16.7846	15.4775	15.2542	14.9664	14.8392	14.1771	14.0068	14.2208	14.7175	15.2482	NA	1.21089	0.130595	1.03414		2.00175	B1AMW1;P19256;P19256-2;P19256-3	2	CD58 antigen, (Lymphocyte function-associated antigen 3), isoform CRA_c;Lymphocyte function-associated antigen 3;Isoform 2 of Lymphocyte function-associated antigen 3;Isoform 3 of Lymphocyte function-associated antigen 3	CD58
17.1271	16.5327	16.225	16.8244	16.4667	20.4822	18.0202	15.4078	15.3839	13.8177	13.9088	17.9324	17.7381	16.4544	15.7373	16.1904	15.7783	18.3319	15.9745	NA	0.0422932	0.935003	-0.0899444		-0.118311	A0A2U3TZL5;E9PNW4;P13987;P13987-2	6	CD59 glycoprotein (Fragment);UPAR/Ly6 domain-containing protein;CD59 glycoprotein;Isoform 2 of CD59 glycoprotein	CD59
12.2201	16.5392	11.7414	13.2251	11.9717	14.5591	15.3845	11.2681	15.3439	15.2269	13.321	11.0375	14.1932	11.711	14.6023	14.7571	14.073	15.2284	11.7439	TISSUE SPECIFICITY: Expressed in spleen, lymph node, thymus, bone marrow, and fetal liver, but not in non-lymphoid tissues. {ECO:0000269|PubMed:9045627}.	0.127723	0.815961	-0.27187		-0.330303	O43866	5	CD5 antigen-like	CD5L
16.1748	15.4577	16.7548	18.2359	16.3761	11.2805	16.3211	16.1103	16.1581	17.6964	15.363	12.7599	11.7482	10.9264	10.904	10.6827	11.1052	11.2655	10.4228	NA;TISSUE SPECIFICITY: Detected in platelets (at protein level). Dysplastic nevi, radial growth phase primary melanomas, hematopoietic cells, tissue macrophages. {ECO:0000269|PubMed:19640571}.	5.07966	0.000405797	4.71624	+	6.27864	F8VV56;F8VWK8;F8W022;P08962;P08962-2;P08962-3	9	CD63 antigen;Tetraspanin (Fragment);Tetraspanin (Fragment);CD63 antigen;Isoform 2 of CD63 antigen;Isoform 3 of CD63 antigen	CD63
16.3552	15.218	15.7776	17.577	16.4649	15.0249	15.9403	16.0541	16.5055	16.0183	15.9353	16.5724	16.8022	14.2727	14.9104	14.2316	13.1161	13.2616	14.427	TISSUE SPECIFICITY: [Isoform p33]: In B cells, represents 70% of total CD74 expression. {ECO:0000269|PubMed:3104027}.;TISSUE SPECIFICITY: [Isoform p41]: In B cells, represents 10% of total CD74 expression. {ECO:0000269|PubMed:3104027}.	2.96694	0.00911675	1.68862	+	3.93002	P04233	18	HLA class II histocompatibility antigen gamma chain	CD74
12.7473	15.4187	15.1283	16.1407	14.2963	16.379	16.6323	10.8632	15.6266	15.1334	14.5223	17.4143	16.1211	14.6016	15.1571	15.126	15.1731	16.5043	17.8339	NA;TISSUE SPECIFICITY: Expressed on B cells (at protein level) (PubMed:20237408). Expressed in hepatocytes (at protein level) (PubMed:12483205). Expressed in monocytes/macrophages (at protein level) (PubMed:12796480). Expressed on both naive and memory CD4-positive T cells (at protein level) (PubMed:22307619). {ECO:0000269|PubMed:12483205, ECO:0000269|PubMed:12796480, ECO:0000269|PubMed:20237408,…	0.487771	0.447358	-0.762959		-1.01301	A6NMH8;E9PIF1;E9PJK1;E9PRJ8;H0YDJ9;H0YDL9;P60033	4	Tetraspanin;Tetraspanin;Tetraspanin;Tetraspanin (Fragment);Tetraspanin (Fragment);Tetraspanin (Fragment);CD81 antigen	CD81
14.469	12.2084	16.4489	15.0313	14.5616	12.5092	12.4946	12.8265	12.0516	14.7577	14.0971	13.1738	14.548	11.255	9.60132	8.74702	9.42805	13.9128	10.9135	TISSUE SPECIFICITY: Lymphoid specific.	2.14269	0.029943	2.51835	+	3.05257	P27701;P27701-2	4	CD82 antigen;Isoform 2 of CD82 antigen	CD82
17.6117	18.9125	17.2544	18.4358	19.646	21.2956	19.4872	17.3705	19.1668	19.3901	17.6103	19.2176	19.495	20.7556	19.4709	19.8404	18.1219	20.5247	19.9932	NA;TISSUE SPECIFICITY: Detected in platelets (at protein level) (PubMed:19640571). Expressed by a variety of hematopoietic and epithelial cells (PubMed:19640571). {ECO:0000269|PubMed:19640571}.	1.09807	0.157822	-0.959917		-1.86331	A0A2R8Y478;A6NNI4;G8JLH6;P21926	9	Tetraspanin;Tetraspanin;Tetraspanin;CD9 antigen	CD9
14.8658	11.4812	13.9376	16.0363	14.2466	14.7512	13.2642	13.2749	14.8719	13.3781	13.8146	14.929	15.1467	13.2761	14.0095	13.8495	13.1809	17.8571	12.3778	TISSUE SPECIFICITY: Highly expressed in endothelial cells, platelets, cells of myeloid origin, such as monocytes and neutrophils. Not expressed in cells of lymphoid origin.	0.0951292	0.8597	-0.17155		-0.25302	Q9NPY3	4	Complement component C1q receptor	CD93
12.2868	15.4009	13.3992	13.3039	11.0431	15.8631	13.2668	13.0457	12.0524	12.7279	9.67655	12.8474	14.8897	15.768	13.3573	13.8655	13.135	15.9979	12.1646	TISSUE SPECIFICITY: Highly expressed in granulocytes while expression is very low in fibroblasts, chondrocytes, monocytes, and T- as well as B-cell lines.	0.944223	0.208565	-1.25882		-1.66762	P32320	3	Cytidine deaminase	CDA
14.5653	13.4789	13.3745	18.4636	14.5817	15.0231	12.6341	14.2724	14.2063	15.965	12.4627	14.7088	14.0511	15.5526	14.8424	14.6999	14.6232	15.2205	11.9222	TISSUE SPECIFICITY: Widely expressed. Expressed in spleen, thymus, prostate, testis, ovary, small intestine, colon and leukocytes with the highest expression in testis. {ECO:0000269|PubMed:9683532}.	0.0313214	0.950855	0.0620578		0.0886206	O75794	4	Cell division cycle protein 123 homolog	CDC123
14.7158	14.2126	15.7618	16.2132	15.1495	14.4721	14.2095	14.2855	15.2879	15.7266	14.0565	14.3493	14.0845	15.6106	14.2676	14.9516	14.2714	15.1057	13.9513	NA	0.360763	0.554359	0.263924		0.798225	Q13042;Q13042-2;Q13042-3;Q13042-4;Q5T8C6	9	Cell division cycle protein 16 homolog;Isoform 2 of Cell division cycle protein 16 homolog;Isoform 3 of Cell division cycle protein 16 homolog;Isoform 4 of Cell division cycle protein 16 homolog;Cell division cycle protein 16 homolog	CDC16
12.7034	14.6907	12.3817	15.5739	12.4234	13.6885	14.1141	13.6443	13.7653	13.7456	13.4248	9.79164	13.0685	13.7163	14.086	14.1837	14.2817	13.6874	10.2543	NA	0.00177235	0.996347	0.00352196		0.00517994	Q86Y33;Q86Y33-2;Q86Y33-3;Q86Y33-4	2	Cell division cycle protein 20 homolog B;Isoform 2 of Cell division cycle protein 20 homolog B;Isoform 3 of Cell division cycle protein 20 homolog B;Isoform 4 of Cell division cycle protein 20 homolog B	CDC20B
15.3738	14.7783	15.8358	16.6081	15.1584	16.8361	14.9164	14.9879	16.4395	15.9433	14.2551	13.4197	14.8512	14.8204	14.5106	14.2545	14.3107	15.4415	13.9658	NA	1.14353	0.146533	0.785848		1.91956	Q9UJX2	8	Cell division cycle protein 23 homolog	CDC23
15.382	14.8913	16.329	13.2019	16.1134	15.9435	13.7406	15.2688	14.785	15.9857	14.4188	15.4705	15.3664	15.0639	14.8624	14.8966	14.796	14.6639	11.9207	NA	0.639193	0.345619	0.617578		1.24642	Q8NHZ8	3	Anaphase-promoting complex subunit CDC26	CDC26
12.6502	14.0094	15.8508	16.4031	14.5113	14.2183	13.3315	14.323	12.2568	16.1961	13.6755	14.1483	13.9946	14.3753	13.3616	13.7717	13.3629	14.3304	11.4714	NA	0.709926	0.307522	0.773848		1.34905	P30260;P30260-2	6	Cell division cycle protein 27 homolog;Isoform 2 of Cell division cycle protein 27 homolog	CDC27
18.35	17.8863	18.3595	18.9907	18.2987	20.0651	17.5442	17.6586	17.8893	18.9276	17.3637	18.0118	18.0538	18.2259	17.9329	17.5718	18.2117	17.9305	17.7859	NA	0.529752	0.41641	0.319876		1.07986	Q16543	45	Hsp90 co-chaperone Cdc37	CDC37
14.4429	13.1247	15.7037	17.2718	14.0264	13.5907	15.2176	14.3616	15.816	15.9798	14.0393	14.3827	13.8162	14.6766	14.3034	14.5297	13.307	14.4891	13.6656	NA	0.822234	0.254432	0.717231		1.50538	O60508	12	Pre-mRNA-processing factor 17	CDC40
16.8571	18.14	17.5195	17.6197	16.5986	17.8577	18.1836	17.1297	17.9958	16.2674	16.9228	18.0835	17.789	17.2168	17.3924	16.7489	17.257	17.3878	17.3505	NA	0.190898	0.736575	0.125222		0.470011	P60953	17	Cell division control protein 42 homolog	CDC42
15.3927	14.4822	16.9263	15.9771	14.862	16.2241	14.0901	14.4417	14.3369	15.6461	14.8504	13.901	13.6667	13.8053	12.7714	13.1633	13.8917	13.8575	13.6057	NA;TISSUE SPECIFICITY: Abundant in the heart, brain, skeletal muscle, kidney, and pancreas, with little or no expression in the lung and liver. {ECO:0000269|PubMed:9092543}.	3.13804	0.00699187	1.55682	+	4.11193	A0A0A0MRJ0;Q5VT25;Q5VT25-2;Q5VT25-3;Q5VT25-4;Q5VT25-5;Q5VT25-6	15	Non-specific serine/threonine protein kinase;Serine/threonine-protein kinase MRCK alpha;Isoform 2 of Serine/threonine-protein kinase MRCK alpha;Isoform 3 of Serine/threonine-protein kinase MRCK alpha;Isoform 4 of Serine/threonine-protein kinase MRCK alpha;Isoform 5 of Serine/threonine-protein kinase MRCK alpha;Isoform 6 of Serine/threonine-protein kinase MRCK alpha	CDC42BPA
14.1078	13.8482	15.2442	14.7656	13.8742	15.5893	13.6276	14.096	14.4185	14.8481	13.7294	14.3051	14.1389	13.1018	13.8296	13.8066	13.8625	13.9982	13.8267	TISSUE SPECIFICITY: Expressed in all tissues examined, with high levels in heart, brain, placenta and lung. {ECO:0000269|PubMed:10198171}.	1.42373	0.0930741	0.576269	+	2.25386	Q9Y5S2	49	Serine/threonine-protein kinase MRCK beta	CDC42BPB
11.5885	12.5107	15.6127	13.6858	13.8405	13.7333	10.8061	13.7703	11.7262	14.9915	14.0721	11.0152	10.5489	11.9382	11.5897	11.252	11.2123	12.5438	11.3497	TISSUE SPECIFICITY: Expressed in heart and skeletal muscle. {ECO:0000269|PubMed:15194684}.	1.73622	0.0571422	1.6221	+	2.60845	Q6DT37	8	Serine/threonine-protein kinase MRCK gamma	CDC42BPG
14.5355	11.7717	13.6842	17.1571	13.1499	13.0525	12.7778	13.3663	11.1332	13.914	14.2296	11.2506	11.4305	13.8127	13.3934	12.9356	14.3388	13.6949	10.9168	TISSUE SPECIFICITY: Endothelial and bone marrow stromal cells.	0.233651	0.686199	0.403385		0.558307	Q00587;Q00587-2	2	Cdc42 effector protein 1;Isoform 2 of Cdc42 effector protein 1	CDC42EP1
14.04	12.7811	18.2353	15.783	14.3038	14.9993	13.9813	13.1782	13.1317	16.4475	14.0595	12.6306	10.8912	14.3821	13.8017	14.1355	13.6912	12.8266	14.0767	TISSUE SPECIFICITY: Not detected in any of the adult tissues tested. May be expressed only in fetal or embryonic tissues.	0.797789	0.264967	1.06358		1.47198	Q9H3Q1	6	Cdc42 effector protein 4	CDC42EP4
13.6423	14.2635	13.6541	14.2717	12.2565	13.2507	15.3795	14.3409	15.2036	14.6527	13.9219	11.8452	10.6335	13.9419	14.1226	13.8001	14.1475	11.309	13.3663	NA	0.790417	0.268415	0.844364		1.46184	Q6NZY7	2	Cdc42 effector protein 5	CDC42EP5
16.7243	16.0702	17.0947	17.8604	16.4845	17.1403	16.13	16.3543	16.7255	16.9894	15.9939	15.6267	15.6866	16.4025	16.1143	16.037	16.45	15.6908	15.7646	TISSUE SPECIFICITY: Ubiquitously expressed in both fetal and adult tissues. {ECO:0000269|PubMed:9038199, ECO:0000269|PubMed:9598309, ECO:0000269|PubMed:9632794}.	1.44998	0.0892823	0.578681	+	2.28427	Q99459	51	Cell division cycle 5-like protein	CDC5L
15.5592	14.1975	16.3868	15.4388	15.4509	16.0959	14.369	14.4933	15.8785	16.4228	14.4882	14.5659	14.1877	14.2887	14.5868	14.2031	14.6646	15.0914	13.8375	TISSUE SPECIFICITY: Found in adrenal and parathyroid glands, kidney and heart. {ECO:0000269|PubMed:15580289}.	1.72621	0.0580264	0.870378	+	2.59732	Q6P1J9	15	Parafibromin	CDC73
14.9527	14.6645	15.4449	15.9271	16.1074	15.0936	14.0543	14.4001	14.0642	16.0872	14.0799	14.073	10.1935	14.3786	13.9465	13.2877	13.8151	13.9199	14.0228	TISSUE SPECIFICITY: Highly expressed in mitotic cells with low expression during interphase. Detected at highest levels in skeletal muscle and colon with lower levels in kidney, small intestine, placenta and lung. Up-regulated in a number of human tumor cell lines, as well as in colorectal cancer, breast carcinoma and lung cancer. Also expressed in cells with phenotypes reminiscent of mesenchymal…	2.11193	0.031449	1.5461	+	3.01941	Q9H5V8	15	CUB domain-containing protein 1	CDCP1
16.8477	17.7562	16.7167	18.0279	17.1509	19.6489	17.4013	17.5719	17.7873	18.2547	17.7238	15.2443	15.8918	16.9931	17.3306	17.282	17.1163	16.8419	17.0096	TISSUE SPECIFICITY: Non-neural epithelial tissues.	0.741764	0.291283	0.587381		1.39414	A0A087WXI5;P12830	29	Cadherin-1	CDH1
13.7446	13.5384	15.0411	15.2422	14.0378	11.8129	13.853	12.4658	14.2017	16.8017	13.8618	13.6142	14.0885	11.4263	13.2127	12.5402	13.3414	15.0001	13.5204	TISSUE SPECIFICITY: Expressed mainly in brain but also found in other tissues. Expressed in neuroblasts.	0.62051	0.35688	0.713727		1.2187	P55287	5	Cadherin-11	CDH11
13.9994	13.1301	16.1216	15.2455	13.746	12.3401	12.8342	14.2423	12.2957	15.3478	14.6524	13.2584	11.6578	12.2073	13.1231	13.5414	12.7656	11.375	12.215	TISSUE SPECIFICITY: Highly expressed in heart. In the CNS, expressed in cerebral cortex, medulla, hippocampus, amygdala, thalamus and substantia nigra. No expression detected in cerebellum or spinal cord. {ECO:0000269|PubMed:10737605, ECO:0000269|PubMed:8673923}.	2.02689	0.0358946	1.52227	+	2.92743	P55290;P55290-4	9	Cadherin-13;Isoform 4 of Cadherin-13	CDH13
18.6533	18.9462	18.7007	19.1119	18.2378	19.68	19.0368	19.3198	19.3763	20.1837	19.9795	16.2694	15.175	19.2786	18.3819	18.7736	19.4039	18.612	18.777	TISSUE SPECIFICITY: Expressed in the gastrointestinal tract and pancreatic duct. Not detected in kidney, lung, liver, brain, adrenal gland and skin. {ECO:0000269|PubMed:8153632}.	0.53793	0.410688	0.6148		1.09267	Q12864	74	Cadherin-17	CDH17
14.7148	11.8238	15.4265	15.1601	14.4108	16.3874	11.7444	13.6167	12.9223	15.8581	14.6502	15.061	14.6427	14.0462	13.4828	13.0658	13.4178	10.9578	11.3209	TISSUE SPECIFICITY: Endothelial tissues and brain.	1.14052	0.147096	1.32409		1.91585	P33151	4	Cadherin-5	CDH5
13.0211	14.1528	13.2896	13.3145	12.7002	15.6865	14.0556	11.8064	15.6808	15.4528	14.5009	11.343	10.6464	12.1344	13.0874	13.1326	11.7449	13.2243	13.0154	NA;TISSUE SPECIFICITY: Highest expression in kidney, liver, colon and small intestine. In kidney, expressed apically along brush border of proximal convoluted tubule but not in cortical collecting ducts. Isoform 1 is expressed primarily in adult small intestine and colon. Isoform 2 is highly expressed in fetal liver (PubMed:12167596). Expressed in duodenum with higher expression in enterocytes al…	1.33674	0.106282	1.32385	+	2.15207	A0A0G2JMW3;A0A0G2JP44;Q9HBB8;Q9HBB8-2;Q9HBB8-4	6	Cadherin-related family member 5;Cadherin-related family member 5;Cadherin-related family member 5;Isoform 2 of Cadherin-related family member 5;Isoform 3 of Cadherin-related family member 5	CDHR5
16.3905	14.9241	18.7096	17.9981	16.5479	12.5276	15.7225	16.6503	15.1514	18.925	17.0214	15.4967	11.5125	10.4823	10.4112	12.2124	10.5197	10.1203	9.78577	NA;TISSUE SPECIFICITY: Detected in placenta (at protein level). Widely expressed. Higher expression in adult liver and skeletal muscle, slightly lower levels seen in pancreas, kidney, lung, placenta, brain, heart, leukocyte, colon, small intestine, ovary, testis, prostate, thymus and spleen. In fetus, expressed in kidney, liver, lung and brain. {ECO:0000269|PubMed:8110188}.	6.28986	0	5.61816	+	7.80147	B3KY94;O14735;O14735-3	8	CDP-diacylglycerol--inositol 3-phosphatidyltransferase;CDP-diacylglycerol--inositol 3-phosphatidyltransferase;Isoform 3 of CDP-diacylglycerol--inositol 3-phosphatidyltransferase	CDIPT
16.8938	14.871	16.9429	17.2115	16.1378	15.403	13.589	14.82	13.7635	15.9284	13.3559	13.8786	10.8731	14.9541	13.8842	13.4241	13.1718	13.7575	12.4325	NA;TISSUE SPECIFICITY: Isoform 2 is found in breast cancer tissues.	2.2108	0.0268825	2.01907	+	3.1258	A0A024QZP7;P06493	15	Cell division cycle 2, G1 to S and G2 to M, isoform CRA_a;Cyclin-dependent kinase 1	CDK1
16.445	15.3945	16.4495	16.9752	16.3641	16.9076	15.708	15.8926	16.318	16.6547	15.3879	15.5927	14.7426	16.3121	16.0352	16.1104	15.8959	16.0254	15.5231	NA;TISSUE SPECIFICITY: Expressed ubiquitously. Some evidence of isoform-specific tissue distribution. {ECO:0000269|PubMed:8195233, ECO:0000269|PubMed:9750192}.	0.749899	0.287659	0.367769		1.40555	A0A0D9SEI3;A0A0D9SEN2;A0A0D9SER5;P21127;P21127-2;P21127-3;P21127-8	29	Cyclin-dependent kinase 11B;Cyclin-dependent kinase 11B;Cyclin-dependent kinase 11B;Cyclin-dependent kinase 11B;Isoform SV1 of Cyclin-dependent kinase 11B;Isoform 2 of Cyclin-dependent kinase 11B;Isoform 8 of Cyclin-dependent kinase 11B	CDK11B
12.6941	12.076	14.5126	12.8542	13.0642	12.5256	11.2062	12.5412	11.7409	13.9444	10.6866	11.6428	11.0449	11.9237	10.0127	11.5531	11.7463	11.0979	10.1423	NA;TISSUE SPECIFICITY: Ubiquitously expressed. {ECO:0000269|PubMed:11683387}.	2.0533	0.0344948	1.38299	+	2.95605	J3QSD7;Q9NYV4;Q9NYV4-2;Q9NYV4-3	7	Cyclin-dependent kinase 12 (Fragment);Cyclin-dependent kinase 12;Isoform 2 of Cyclin-dependent kinase 12;Isoform 3 of Cyclin-dependent kinase 12	CDK12
13.6779	13.071	11.7469	15.9879	13.7404	12.0034	9.80028	13.0551	11.2896	12.8263	12.3738	11.2992	10.7329	10.8331	9.69737	10.7438	9.76092	10.3014	7.44467	NA;TISSUE SPECIFICITY: Detected in pancreas islets (at protein level). Detected in brain and pancreas. {ECO:0000269|PubMed:22798068}.	2.89569	0.00997201	2.64205	+	3.85439	A0A087WZU2;H0YAZ9;Q00536;Q00536-2;Q00536-3	2	Cyclin-dependent kinase 16;Cyclin-dependent kinase 16 (Fragment);Cyclin-dependent kinase 16;Isoform 2 of Cyclin-dependent kinase 16;Isoform 3 of Cyclin-dependent kinase 16	CDK16
14.778	12.7933	17.7113	15.9751	14.2349	14.4623	11.8563	14.1703	15.6137	17.6126	13.4016	12.238	10.797	11.4098	12.6685	10.2326	13.1106	9.77332	11.9922	NA	2.92967	0.00960522	3.14431	+	3.89045	G3V5T9;P24941;P24941-2	6	Cyclin-dependent kinase 2;Cyclin-dependent kinase 2;Isoform 2 of Cyclin-dependent kinase 2	CDK2
16.0932	13.5988	16.9874	18.609	16.2751	15.5987	15.6657	15.0783	15.7927	16.0424	14.1726	16.4024	15.6257	15.1822	13.6974	14.0521	15.5715	15.3973	14.8859	TISSUE SPECIFICITY: Isoform 1 is ubiquitously expressed. Accumulates in cortical neurons (at protein level). Isoform 2 has only been detected in testis, skeletal muscle, colon, bone marrow and ovary. {ECO:0000269|PubMed:17009320, ECO:0000269|PubMed:19693690}.	1.01833	0.182493	0.943648		1.763	Q00535	6	Cyclin-dependent-like kinase 5	CDK5
13.0362	11.6232	14.2694	12.5558	12.4307	11.8128	11.195	13.095	13.5346	14.9427	11.9594	10.9401	10.5322	13.1031	11.7571	12.8218	11.1257	10.9432	10.8447	TISSUE SPECIFICITY: [Isoform 5]: Mainly expressed in brain, placenta and testis.;TISSUE SPECIFICITY: [Isoform 6]: High expression in placenta and lung.;TISSUE SPECIFICITY: Expressed in heart, brain, placenta, lung, liver, skeletal muscle, kidney and pancreas (PubMed:10721722). Expressed in neurons of central nervous tissue (PubMed:10721722, PubMed:11882646). {ECO:0000269|PubMed:10721722, ECO:0000…	1.10954	0.15511	1.02657		1.87757	Q96SZ6;Q96SZ6-2;Q96SZ6-3	3	Mitochondrial tRNA methylthiotransferase CDK5RAP1;Isoform 2 of Mitochondrial tRNA methylthiotransferase CDK5RAP1;Isoform 3 of Mitochondrial tRNA methylthiotransferase CDK5RAP1	CDK5RAP1
14.7002	15.4858	15.7795	17.0422	14.7222	15.9964	15.0702	15.6599	16.095	15.9646	15.1455	14.6808	15.5607	15.2665	14.57	15.1698	14.3762	15.2703	14.9804	TISSUE SPECIFICITY: Ubiquitously expressed (PubMed:12054757, PubMed:10721722). Expressed in heart, brain, placenta, lung, liver, skeletal muscle, kidney and pancreas. Isoform 3 is expressed in kidney, liver, skeletal muscle and placenta (PubMed:12737517). {ECO:0000269|PubMed:10721722, ECO:0000269|PubMed:12054757, ECO:0000269|PubMed:12737517}.	0.964281	0.201573	0.500805		1.69366	Q96JB5;Q96JB5-4	23	CDK5 regulatory subunit-associated protein 3;Isoform 4 of CDK5 regulatory subunit-associated protein 3	CDK5RAP3
15.8832	15.454	16.6165	17.3918	15.3559	16.5617	14.7021	15.5447	16.234	15.9516	15.5417	15.2737	15.5181	14.9432	15.9209	15.5358	15.8362	14.9616	13.8857	TISSUE SPECIFICITY: Expressed ubiquitously. Accumulates in squamous cell carcinomas, proliferating hematopoietic progenitor cells, beta-cells of pancreatic islets of Langerhans, and neuroblastomas. Reduced levels in differentiating cells. {ECO:0000269|PubMed:20668294, ECO:0000269|PubMed:8114739}.	1.11669	0.153337	0.647104		1.88643	Q00534	5	Cyclin-dependent kinase 6	CDK6
13.7627	15.0596	15.7312	13.0489	15.0099	16.269	15.1112	14.6476	18.0507	15.0377	15.0461	16.1191	13.6512	15.2537	14.9148	14.3931	15.0969	14.3402	13.3189	TISSUE SPECIFICITY: Ubiquitous.	0.86045	0.238977	0.817034		1.55698	P50750;P50750-2	10	Cyclin-dependent kinase 9;Isoform 2 of Cyclin-dependent kinase 9	CDK9
14.8687	15.8078	15.6424	15.982	15.2786	13.1966	13.4238	14.3196	12.7186	13.8414	13.2078	13.1012	9.77883	14.0723	13.532	13.021	14.0248	9.81066	13.0452	TISSUE SPECIFICITY: Expressed in pancreatic islets. {ECO:0000269|PubMed:23048041}.	1.72797	0.0578392	1.81313	+	2.59927	Q5VV42	4	Threonylcarbamoyladenosine tRNA methylthiotransferase	CDKAL1
14.5225	13.1756	14.2722	14.5765	12.5004	13.428	13.7122	12.7716	11.9653	14.8974	13.5289	10.7377	13.5504	12.3945	3.01835	12.3107	10.1165	11.2917	12.2393	NA;TISSUE SPECIFICITY: Expressed in all tissues tested. Highest levels in skeletal muscle, lowest in liver and kidney.	1.53936	0.077214	2.63762	+	2.38687	E7ES52;P46527	6	Cyclin-dependent kinase inhibitor 1B	CDKN1B
14.7603	14.0456	15.7574	16.5346	15.2728	15.5071	14.6248	15.2239	15.0889	15.9092	14.8047	14.914	14.3909	15.3816	14.1788	14.9136	14.7253	15.4104	15.1483	TISSUE SPECIFICITY: Ubiquitously expressed. {ECO:0000269|PubMed:12581788}.	0.56564	0.39293	0.325192		1.13563	Q9NXV6	24	CDKN2A-interacting protein	CDKN2AIP
14.5866	14.3009	16.0336	12.5709	14.3761	14.1782	12.8713	14.1192	12.2748	13.9862	12.8801	13.538	10.878	10.9463	10.2165	11.6529	12.1678	11.557	10.8777	NA	4.8063	0.000412371	2.62448	+	5.95663	Q96HQ2	5	CDKN2AIP N-terminal-like protein	CDKN2AIPNL
12.394	13.6563	12.4619	13.0108	14.4968	15.0161	13.1573	13.7901	12.9459	11.8957	13.4677	11.6184	14.7781	12.1105	12.9261	12.8007	14.7039	13.7869	13.4564	TISSUE SPECIFICITY: Highest levels found in skeletal muscle. Also found in pancreas and heart.	0.32586	0.588323	-0.349706		-0.735241	P42773	2	Cyclin-dependent kinase 4 inhibitor C	CDKN2C
14.2071	13.2774	14.9305	13.6732	14.0131	12.03	14.3153	14.1634	14.6756	15.5214	14.6847	12.2785	13.6851	11.0778	11.3237	10.5332	9.76305	11.0304	10.9125	TISSUE SPECIFICITY: Expressed in adult tissues such as placenta, brain, small intestine, ovary, testis and prostate. Highly expressed in fetal kidney, lung and brain. Lower level in fetal liver. {ECO:0000269|PubMed:9407135}.	4.26273	0.00115337	2.79145	+	5.33582	Q92903	2	Phosphatidate cytidylyltransferase 1	CDS1
14.2759	11.4505	15.3497	17.5525	15.4703	9.09046	13.2674	14.5078	13.2795	17.0478	14.0476	13.2006	14.0949	12.8457	10.7019	13.3965	13.5054	13.1318	12.413	TISSUE SPECIFICITY: Widely expressed. Expressed in heart, brain and retina, and to a lesser extent in placenta, lung, liver, skeletal muscle, kidney and pancreas. {ECO:0000269|PubMed:9889000}.	0.646511	0.341561	1.17512		1.25721	O95674	9	Phosphatidate cytidylyltransferase 2	CDS2
16.1638	15.5864	16.8968	16.3837	17.3319	18.3437	15.2103	16.7331	14.2615	14.293	16.0311	14.8864	14.9883	15.3712	14.4732	14.3953	15.4228	15.5667	14.7164	TISSUE SPECIFICITY: Expression levels correlate with those of HER-2/neu in breast cancer cells. {ECO:0000269|PubMed:10497265}.	1.27338	0.117783	1.01961		2.07688	Q9UKY7;Q9UKY7-2	14	Protein CDV3 homolog;Isoform 2 of Protein CDV3 homolog	CDV3
12.4631	12.2294	12.9976	13.6825	15.6395	14.8939	13.8813	13.8811	11.9524	14.2445	13.3663	10.8583	10.588	13.5915	12.845	13.3508	12.8258	13.0901	13.6745	TISSUE SPECIFICITY: Detected in small intestine, colon and pancreas. {ECO:0000269|PubMed:9933478}.	0.378409	0.538115	0.488579		0.829352	Q99626	6	Homeobox protein CDX-2	CDX2
13.2763	13.4249	14.9098	14.1386	13.2353	13.0516	13.4485	12.3223	12.2847	15.3575	11.0304	13.9652	12.9138	12.5909	12.6577	12.486	13.1808	13.9861	11.0964	TISSUE SPECIFICITY: Expressed in the hippocampus with reduced expression in epileptic tissue compared to normal adjacent tissue (at protein level) (PubMed:28842554). Ubiquitous (PubMed:19808672). Expressed at moderate levels in all tissues examined (PubMed:19808672). Isoform 2: Most abundantly expressed isoform (PubMed:19808672). {ECO:0000269|PubMed:19808672, ECO:0000269|PubMed:28842554}.	0.679795	0.323622	0.668765		1.30576	Q9Y232;Q9Y232-2;Q9Y232-4	4	Chromodomain Y-like protein;Isoform 2 of Chromodomain Y-like protein;Isoform 4 of Chromodomain Y-like protein	CDYL
13.9974	12.1656	15.262	14.1438	14.8009	15.2171	12.5861	12.0207	14.6775	15.1559	12.0816	13.7803	10.497	12.7633	12.0624	12.5779	12.4851	14.3802	12.3693	TISSUE SPECIFICITY: Expressed in columnar epithelial cells of the colon (at protein level) (PubMed:10436421). The predominant forms expressed by T cells are those containing a long cytoplasmic domain (PubMed:18424730). Expressed in granulocytes and lymphocytes. Leukocytes only express isoforms 6 and isoform 1 (PubMed:11994468). {ECO:0000269|PubMed:10436421, ECO:0000269|PubMed:11994468, ECO:000026…	1.49887	0.0828226	1.37619	+	2.34057	P13688	9	Carcinoembryonic antigen-related cell adhesion molecule 1	CEACAM1
17.9196	16.9611	18.0243	17.5678	17.3475	17.7653	16.6105	16.6157	17.6245	16.5346	16.0679	16.7611	14.7233	16.4099	15.06	16.1338	16.1238	18.0961	15.7039	TISSUE SPECIFICITY: Expressed in columnar epithelial and goblet cells of the colon (at protein level) (PubMed:10436421). Found in adenocarcinomas of endodermally derived digestive system epithelium and fetal colon. {ECO:0000269|PubMed:10436421}.	1.93459	0.041206	1.11417	+	2.82698	P06731;P06731-2	17	Carcinoembryonic antigen-related cell adhesion molecule 5;Isoform 2 of Carcinoembryonic antigen-related cell adhesion molecule 5	CEACAM5
13.6054	11.7581	13.4708	15.9947	17.2703	19.3353	13.9447	12.2345	12.2033	13.1565	11.4293	13.0329	11.6076	13.2417	12.1034	12.6648	10.6965	16.1385	10.9551	TISSUE SPECIFICITY: Expressed in neutrophils (PubMed:1378450). Expressed in columnar epithelial and goblet cells of the colon (PubMed:10436421). Expressed in numerous tumor cell lines (at protein level) (PubMed:16204051). {ECO:0000269|PubMed:10436421, ECO:0000269|PubMed:1378450, ECO:0000269|PubMed:16204051}.	0.739052	0.292784	1.4662		1.39032	P40199	3	Carcinoembryonic antigen-related cell adhesion molecule 6	CEACAM6
16.3016	17.4667	16.9533	17.2333	16.4324	19.8837	15.1522	14.9409	17.1201	17.8337	16.1842	13.5328	11.4891	14.5292	14.7514	15.4904	13.9609	14.3315	14.3776	TISSUE SPECIFICITY: Expressed in columnar epithelial cells of the colon (at protein level) (PubMed:10436421). Strongly down-regulated in colonic adenocarcinomas. {ECO:0000269|PubMed:10436421}.	2.51922	0.017197	2.45337	+	3.45497	Q14002	10	Carcinoembryonic antigen-related cell adhesion molecule 7	CEACAM7
15.4301	11.7991	15.058	16.4907	12.5649	13.8168	11.6086	11.9925	14.8002	17.4593	14.5144	12.604	15.6047	13.0715	12.0045	12.5848	13.9577	11.2758	12.4114	NA	0.620805	0.35672	1.02436		1.21914	P49716	1	CCAAT/enhancer-binding protein delta	CEBPD
15.4726	15.2804	15.1921	17.2239	15.9588	15.0022	14.6943	14.8256	14.9479	15.2826	13.8884	15.1902	14.386	15.4477	14.6813	15.3222	14.757	15.2306	13.8472	NA	0.652636	0.338976	0.436318		1.2662	Q03701	30	CCAAT/enhancer-binding protein zeta	CEBPZ
11.4254	12.1129	13.1707	13.3654	14.529	12.7149	11.9324	15.6436	16.7614	13.0033	15.048	10.8647	11.3095	14.9326	13.6949	15.8431	13.9359	16.7872	15.1009	NA	0.703168	0.311146	-1.13389		-1.33939	P09093	9	Chymotrypsin-like elastase family member 3A	CELA3A
15.0556	14.9198	13.6124	16.1339	14.8563	16.8864	14.8104	14.1172	15.1007	15.1525	14.4451	15.1995	15.1534	14.8641	15.4911	15.195	15.0254	15.9825	14.9129	NA;TISSUE SPECIFICITY: Ubiquitous. {ECO:0000269|PubMed:10893231, ECO:0000269|PubMed:11158314, ECO:0000269|PubMed:16862542}.	0.256577	0.66154	-0.207895		-0.603891	G5EA30;Q92879;Q92879-2;Q92879-3	16	CUG triplet repeat, RNA binding protein 1, isoform CRA_c;CUGBP Elav-like family member 1;Isoform 2 of CUGBP Elav-like family member 1;Isoform 3 of CUGBP Elav-like family member 1	CELF1
15.3717	14.8681	15.5568	16.2497	15.5473	16.942	15.4151	15.6513	15.8994	15.5703	15.4137	15.7777	16.9235	15.8988	16.107	15.8939	13.9944	15.6642	15.5304	NA	0.0304857	0.951912	-0.0274389		-0.086332	A0A0J9YXJ0;E9PC62	10	CUGBP Elav-like family member 2	CELF2
12.7635	11.803	15.7462	12.7978	16.1797	13.4482	11.9102	12.9681	11.7721	13.8835	11.9316	10.6291	10.2071	13.03	12.7239	12.9272	12.1932	13.3219	10.756	TISSUE SPECIFICITY: Expressed in dermal and in synovial fibroblasts. Strongly expressed in gastric cancers compared with the paired normal tissues. Strongly expressed in both ductal carcinoma and invasive breast cancer cells compared with benign epithelial cells (at protein level). Strongly expressed in brain, placenta, prostate, breast, lung and testis. Expressed in fibroblasts, epithelial cells…	0.573402	0.387267	0.820453		1.14754	Q8WUJ3;Q8WUJ3-2	5	Cell migration-inducing and hyaluronan-binding protein;Isoform 2 of Cell migration-inducing and hyaluronan-binding protein	CEMIP
14.0259	13.7587	15.5402	14.389	13.8927	14.1192	12.1818	14.4155	13.8196	14.2321	12.7854	12.4086	13.3172	13.5623	12.1216	11.657	12.8226	13.8502	11.9958	TISSUE SPECIFICITY: Widely expressed. {ECO:0000269|PubMed:10767548}.	1.54891	0.0761124	1.03644	+	2.39775	Q9UHN6	21	Cell surface hyaluronidase	CEMIP2
13.5824	12.1063	13.4063	13.3256	13.0815	10.9035	13.0898	13.1213	12.8176	14.2477	13.2962	13.0556	11.3892	13.0724	12.862	12.4239	12.5399	13.0607	10.2546	NA	1.03918	0.175847	0.773872		1.78944	Q03188	9	Centromere protein C	CENPC
14.1962	12.4082	13.8825	17.2766	14.5879	16.384	13.7942	14.0418	13.8674	12.6384	14.2466	13.5662	11.8983	13.4872	14.0553	14.2098	13.7103	14.1511	12.8699	NA	0.684218	0.321524	0.757698		1.31215	Q7Z7K6;Q7Z7K6-3	8	Centromere protein V;Isoform 3 of Centromere protein V	CENPV
12.7963	11.9327	14.9095	14.5046	12.0974	14.32	11.8805	12.3345	11.5553	14.7711	12.9336	11.7252	11.413	11.1445	12.1485	11.6357	12.5612	11.4022	11.6719	NA	1.62493	0.0678585	1.26905	+	2.48387	H0Y2V6;Q5SW79	6	Centrosomal protein of 170 kDa (Fragment);Centrosomal protein of 170 kDa	CEP170
14.5808	13.4776	15.3058	15.561	14.0134	15.8512	13.3071	13.5382	15.09	15.2693	12.6699	10.7037	11.7723	12.6529	13.6148	13.4269	13.8194	16.0532	12.8171	NA	0.462856	0.467016	0.66306		0.972443	J3KQR7;Q9Y4F5;Q9Y4F5-2	14	Centrosomal protein of 170 kDa protein B;Centrosomal protein of 170 kDa protein B;Isoform 2 of Centrosomal protein of 170 kDa protein B	CEP170B
12.0284	12.2439	13.2658	12.2442	11.3575	11.7285	10.568	10.8819	12.1933	12.7972	11.6245	11.1902	10.2969	10.4787	11.5656	11.3371	10.7178	10.3747	10.1153	TISSUE SPECIFICITY: Ubiquitously and weakly expressed.	2.47357	0.0184533	1.14559	+	3.40643	Q9BV73;Q9BV73-2	6	Centrosome-associated protein CEP250;Isoform 2 of Centrosome-associated protein CEP250	CEP250
15.2372	15.7655	12.8165	13.6141	12.0072	15.4511	12.2956	12.7091	12.3477	13.243	13.1592	11.3326	13.0851	12.6612	12.2781	12.9975	13.0309	11.2538	11.7402	TISSUE SPECIFICITY: [Isoform 1]: Expressed in testis and fetal tissues. {ECO:0000269|PubMed:12034494}.;TISSUE SPECIFICITY: [Isoform 3]: Expressed in testis and fetal tissues. {ECO:0000269|PubMed:12034494}.	0.843422	0.245449	0.89632		1.53408	Q9BYV8;Q9BYV8-2;Q9BYV8-5	1	Centrosomal protein of 41 kDa;Isoform 2 of Centrosomal protein of 41 kDa;Isoform 4 of Centrosomal protein of 41 kDa	CEP41
15.8744	11.7133	17.7351	16.1764	15.5784	18.255	15.1188	15.3021	12.8574	16.5851	15.2626	11.7658	11.9544	15.3718	15.2665	11.5929	14.9621	15.565	15.1615	TISSUE SPECIFICITY: Ubiquitous. Highly expressed in heart, liver, muscle, kidney, intestine, colon, adrenal gland, prostate, testis, and pancreas. {ECO:0000269|PubMed:9949182}.	0.465317	0.465199	0.917637		0.976482	O95684;O95684-2	4	Centrosomal protein 43;Isoform 2 of Centrosomal protein 43	CEP43
12.2633	12.8413	11.7774	13.5575	10.4632	21.2192	13.4207	13.0518	12.7602	9.47658	8.28727	11.9036	15.1002	13.5692	14.707	14.8068	14.377	15.888	14.0648	NA;TISSUE SPECIFICITY: Expressed in monocytes and dendritic cells. {ECO:0000269|PubMed:31836654}.;TISSUE SPECIFICITY: Isoform 1 and isoform 4 are expressed in spleen, lymph, thymus, tonsil and peripheral blood leukocytes, with isoform 1 expressed at higher levels. Isoform 4 is detected in K-562 leukemia cells and in the blood of precursor T lymphoblastic lymphoma (T-ALL) patients. {ECO:0000269|Pu…	0.949435	0.206548	-2.05956		-1.6744	A2A3P3;E0CX11;Q5SZL2;Q5SZL2-4	1	Centrosomal protein of 85 kDa-like (Fragment);Short transmembrane mitochondrial protein 1;Centrosomal protein of 85 kDa-like;Isoform 4 of Centrosomal protein of 85 kDa-like	CEP85L
14.2213	13.6549	15.6984	13.5213	12.1668	18.4549	14.4679	12.2083	12.7589	16.0374	14.8551	17.5859	10.4797	12.4267	11.6618	11.4824	10.5938	12.3347	15.1488	NA;TISSUE SPECIFICITY: Ubiquitously expressed. {ECO:0000269|PubMed:10191259}.	2.04665	0.034795	2.61764	+	2.94884	A0A0C4DGS9;Q9Y6K0	2	Choline/ethanolaminephosphotransferase 1	CEPT1
16.0315	17.1333	16.7783	16.572	17.6059	16.9809	16.1231	16.3613	13.6218	16.0448	11.8288	15.4986	10.7771	14.6795	11.8488	11.8758	15.6776	10.5234	10.2806	TISSUE SPECIFICITY: Expressed in kidney, liver, brain, heart, placenta and lung. {ECO:0000269|PubMed:11543633}.	3.24014	0.00616555	3.64415	+	4.22077	Q96G23	8	Ceramide synthase 2	CERS2
11.4005	13.1612	12.5385	12.8968	12.2232	11.2804	13.0088	13.0361	15.206	12.3682	13.1482	14.4611	11.5521	14.0878	13.0071	12.9276	12.2459	10.3097	13.1983	NA	0.33886	0.576216	0.418578		0.758928	F8VXY1;H0YI10;Q49AQ3;Q8N5B7;Q8N5B7-2	1	Ceramide synthase 5;Ceramide synthase 5 (Fragment);Ceramide synthase 5;Ceramide synthase 5;Isoform 2 of Ceramide synthase 5	CERS5
13.7159	11.9574	12.9048	13.3223	14.0363	15.752	13.85	13.1142	12.063	14.4792	13.3931	12.6937	13.4098	13.1577	12.4975	12.5954	13.0233	14.428	13.173	NA;TISSUE SPECIFICITY: Widely expressed.	0.246358	0.672894	0.256634		0.583715	A0A2R8Y7Q9;Q9Y5P4;Q9Y5P4-2;Q9Y5P4-3	18	Ceramide transfer protein;Ceramide transfer protein;Isoform 2 of Ceramide transfer protein;Isoform 3 of Ceramide transfer protein	CERT1
16.7913	17.0394	20.2935	18.3579	16.1927	18.0287	16.5729	15.0413	17.5179	17.2512	16.2533	17.4807	19.3469	15.5582	16.324	17.3483	15.7636	15.5498	17.5218	TISSUE SPECIFICITY: Expressed predominantly in liver with lower levels in heart and lung (PubMed:10562416). Expressed in macrophages (PubMed:11015575, PubMed:21049984, PubMed:18762277). {ECO:0000269|PubMed:10562416, ECO:0000269|PubMed:11015575, ECO:0000269|PubMed:18762277, ECO:0000269|PubMed:21049984}.	0.319448	0.595126	0.461851		0.723453	P23141;P23141-2	49	Liver carboxylesterase 1;Isoform 2 of Liver carboxylesterase 1	CES1
19.2093	17.5606	17.0418	18.8973	15.8725	21.0475	19.0826	17.3498	19.3387	18.6054	19.6134	14.7816	15.0938	18.2989	17.8125	18.4874	17.7703	18.6416	16.3144	TISSUE SPECIFICITY: Preferentially expressed in intestine with moderate expression in liver. Within the intestine, highest expression is found in small intestine with lower expression in colon and rectum. {ECO:0000269|PubMed:9144407}.	0.439135	0.486243	0.711626		0.933161	O00748;O00748-4	40	Cocaine esterase;Isoform 3 of Cocaine esterase	CES2
13.858	13.6805	14.6275	13.5064	13.5161	14.5952	14.6553	15.1562	15.1716	15.9677	15.2988	13.0483	12.5608	13.4541	13.5525	13.7842	13.2712	13.0466	13.2042	TISSUE SPECIFICITY: Expressed in liver, colon and small intestine. {ECO:0000269|PubMed:14581373, ECO:0000269|PubMed:15100172, ECO:0000269|PubMed:15687373}.	2.29078	0.0237568	1.15579	+	3.21149	Q6UWW8	12	Carboxylesterase 3	CES3
13.8258	13.7146	15.4721	14.3338	14.0141	16.0165	13.542	12.6639	12.9995	12.1712	12.5965	13.3253	13.3237	10.74	11.4247	11.4869	11.6736	12.3602	12.967	NA	2.46507	0.018603	1.72637	+	3.39738	P41208	8	Centrin-2	CETN2
12.1999	11.4482	12.743	15.5229	14.1933	12.3182	11.8444	14.0299	12.317	13.3861	12.437	14.4547	14.394	10.8528	11.917	10.5533	10.0914	12.6742	13.556	NA	0.913869	0.218614	1.06902		1.6279	Q9Y6A4	8	Cilia- and flagella-associated protein 20	CFAP20
13.6463	14.7763	14.8384	13.2015	14.983	15.3954	14.26	13.79	13.5031	13.4289	14.5534	13.4363	14.9984	14.806	13.9298	14.8506	14.2905	10.4312	13.7888	NA	0.218969	0.703222	0.280284		0.52849	P57076	3	Cilia- and flagella-associated protein 298	CFAP298
14.634	12.9151	17.1407	14.6587	14.2757	12.0652	14.2553	13.5784	13.4116	16.1722	14.8712	10.5789	14.0352	12.8359	7.70131	12.2518	12.7616	7.99945	13.5926	NA	1.59965	0.070369	2.44959	+	2.45532	K7ERG9;P00746	4	Complement factor D	CFD
15.8096	15.4804	15.5857	16.2674	14.8442	19.0017	15.4931	15.494	15.8286	16.8972	15.7618	15.0946	14.7768	15.6638	15.4265	15.2805	16.1679	16.1928	14.9168	TISSUE SPECIFICITY: Ubiquitous. {ECO:0000269|PubMed:9602175}.	0.518249	0.424307	0.47387		1.06172	Q9UEE9	9	Craniofacial development protein 1	CFDP1
16.0311	16.8623	17.2145	18.1235	14.9972	18.0043	16.6596	15.1112	16.2815	17.947	16.5807	14.7895	18.3686	16.2339	16.7062	16.7668	16.9675	18.7121	17.6521	TISSUE SPECIFICITY: Expressed in the retinal pigment epithelium (at protein level) (PubMed:25136834). CFH is one of the most abundant complement components in blood where the liver is the major source of CFH protein in vivo. in addition, CFH is secreted by additional cell types including monocytes, fibroblasts, or endothelial cells (PubMed:6444659, PubMed:2968404, PubMed:2139673, PubMed:25136834)…	0.842574	0.245528	-0.79368		-1.53294	P08603	53	Complement factor H	CFH
14.2738	15.3405	12.8583	14.9739	12.7033	19.1883	12.1533	12.2933	12.9027	12.0897	11.1454	13.7774	15.7889	15.047	15.2665	12.964	14.9245	15.5445	15.2338	NA	0.847009	0.244132	-1.32538		-1.53892	B1AKG0	2	Complement factor H-related protein 1	CFHR1
11.5104	14.9767	12.3234	13.6061	11.2954	15.074	13.2213	12.0439	13.883	12.3254	11.9035	10.1118	15.8421	13.1058	13.8117	14.9693	10.6809	16.2674	13.7919	NA;TISSUE SPECIFICITY: Expressed by the liver and secreted in plasma.	1.01529	0.183388	-1.37743		-1.75912	A0A3B3IQ51;A0A3B3ISW6;P36980;P36980-2;V9GYE7	1	Complement factor H-related protein 2;Complement factor H-related protein 2 (Fragment);Complement factor H-related protein 2;Isoform Short of Complement factor H-related protein 2;Complement factor H-related protein 2	CFHR2
12.0456	12.1786	17.1665	17.9287	12.3701	12.032	14.1022	10.5702	12.9637	13.4681	9.94883	13.1277	14.6954	12.9608	13.4332	13.5506	10.9694	15.4429	10.1706	TISSUE SPECIFICITY: Expressed by the liver and secreted in plasma.	0.0432929	0.933777	0.126673		0.120984	Q9BXR6	3	Complement factor H-related protein 5	CFHR5
14.345	15.3492	17.0046	13.8728	13.9427	15.7111	14.8826	13.7176	15.4203	12.1497	15.1937	15.0029	15.24	11.9107	14.8742	15.08	13.7986	14.2838	16.1193	TISSUE SPECIFICITY: Isoform CFL2b is expressed predominantly in skeletal muscle and heart. Isoform CFL2a is expressed in various tissues.	0.160225	0.775975	0.243642		0.40369	Q9Y281	8	Cofilin-2	CFL2
11.7788	11.2299	12.1279	12.6646	12.2647	13.3238	10.838	12.1909	13.0489	12.3921	11.2734	10.3813	10.4017	9.58661	10.56	9.85525	9.74073	10.3122	9.43254	NA	4.37173	0.00107042	1.97541	+	5.45842	E9PAQ1;P27918	2	Properdin	CFP
15.3947	13.409	18.5675	15.215	14.4993	15.8842	16.2504	15.1139	14.5448	15.7299	15.4321	14.848	13.7227	14.5619	15.387	13.3496	14.6022	13.9437	14.6015	TISSUE SPECIFICITY: Ubiquitous. Highly expressed in placenta, thymus, lymph nodes, cerebellum and cerebral cortex. Low expression in other regions of the brain. {ECO:0000269|PubMed:14667814}.	1.32414	0.108709	1.09758	+	2.13719	Q9UFW8	7	CGG triplet repeat-binding protein 1	CGGBP1
12.5348	14.0982	13.4197	13.4758	12.6888	18.3356	13.1404	12.0431	13.0753	12.779	12.1786	11.5934	11.0079	14.5837	13.5358	13.4663	14.8371	14.1599	13.7276	NA	0.180082	0.751206	-0.336705		-0.446929	A6PVU7	2	Cingulin (Fragment)	CGN
15.5632	15.9996	16.5746	13.9285	15.4567	16.1229	15.5361	16.2043	16.7182	15.2554	15.8194	15.8674	16.0766	16.8203	16.3474	16.674	17.1118	16.0897	15.2597	TISSUE SPECIFICITY: Smooth muscle, spleen, testis, fetal brain, amygdala, corpus callosum, cerebellum, thalamus and subthalamic nucleus of adult brain. {ECO:0000269|PubMed:11214970}.	1.04379	0.174366	-0.586082		-1.79528	Q0VF96	7	Cingulin-like protein 1	CGNL1
13.2614	14.2135	15.2614	13.1019	13.9008	10.8097	14.7779	12.8244	14.4927	16.286	14.1391	10.0692	11.3489	11.4651	10.1402	13.0898	12.3593	10.8073	11.5358	NA	1.93948	0.0409385	2.05964	+	2.83232	A0A4W8VYG7;A0A4W8W4R1;Q99674	12	Cell growth regulator with EF hand domain protein 1	CGREF1
14.9341	14.0784	16.7524	16.5839	15.5816	15.7522	14.716	14.3223	14.6098	16.1	14.0256	15.3117	13.3582	14.3186	13.8771	14.0965	13.8004	14.3256	14.2347	NA	2.37953	0.0208976	1.22908	+	3.30627	Q96JM3	13	Chromosome alignment-maintaining phosphoprotein 1	CHAMP1
15.4857	16.6789	15.6759	15.4671	15.6849	20.1607	18.0483	19.0796	17.3323	14.4421	19.4053	16.235	16.6757	18.2223	16.3673	17.7447	18.1196	17.5998	16.0519	NA	0.148511	0.790536	-0.279839		-0.377632	Q9Y6H1	6	Coiled-coil-helix-coiled-coil-helix domain-containing protein 2	CHCHD2
15.3518	15.5623	16.5089	15.7399	15.3957	18.6126	16.2366	15.7318	16.2934	16.7133	15.7713	16.155	15.7245	16.0737	15.738	15.8025	13.7687	16.3313	15.9213	NA;TISSUE SPECIFICITY: Detected at low levels in brain, placenta, lung, liver, kidney and pancreas with increased levels in heart and skeletal muscle. Higher expression in primary lung cancers than in normal lung tissue. {ECO:0000269|PubMed:22567091}.	0.696134	0.314377	0.549831		1.32931	C9JRZ6;Q9NX63	33	MICOS complex subunit;MICOS complex subunit MIC19	CHCHD3
13.3429	13.5358	12.8276	15.1628	13.0177	13.7785	13.6536	12.7522	14.037	15.7778	13.0736	13.788	13.8359	12.9383	12.7907	11.9123	10.8621	11.4674	13.3087	TISSUE SPECIFICITY: Expressed in all tissues tested, suggesting an ubiquitous expression. {ECO:0000269|PubMed:16185709}.	1.89117	0.0446772	1.28392	+	2.77948	Q8N4Q1	7	Mitochondrial intermembrane space import and assembly protein 40	CHCHD4
13.0992	15.9836	12.7343	13.4997	13.7324	18.701	11.021	12.2812	12.8675	12.5367	11.5517	15.0927	15.7195	14.6291	13.9346	14.7455	15.193	15.392	14.8368	NA	0.900638	0.223678	-1.32974		-1.61046	Q9BSY4;Q9BSY4-2	2	Coiled-coil-helix-coiled-coil-helix domain-containing protein 5;Isoform 2 of Coiled-coil-helix-coiled-coil-helix domain-containing protein 5	CHCHD5
14.831	14.7721	12.7381	13.9547	14.7516	17.9757	14.5989	14.7095	14.4871	12.1978	14.1414	13.4342	13.5146	13.9142	13.3072	13.7133	11.3895	12.0387	14.0207	NA	1.24515	0.123735	1.25436		2.04307	J3QTA6;Q9BRQ6	6	MICOS complex subunit;MICOS complex subunit MIC25	CHCHD6
13.3119	15.4329	12.6356	13.5056	11.4198	16.0399	14.9763	13.0944	14.0183	13.3375	13.2914	13.2392	14.8462	13.6594	13.5906	15.8326	14.7147	14.3953	14.4978	NA	0.844318	0.245179	-0.813316		-1.53529	J3KPV1;Q9BUK0;Q9BUK0-2;Q9BUK0-4	2	Coiled-coil-helix-coiled-coil-helix domain-containing protein 7;Coiled-coil-helix-coiled-coil-helix domain-containing protein 7;Isoform 2 of Coiled-coil-helix-coiled-coil-helix domain-containing protein 7;Isoform 4 of Coiled-coil-helix-coiled-coil-helix domain-containing protein 7	CHCHD7
14.5508	13.8089	13.7764	16.0331	14.2993	12.7929	12.341	13.8969	12.3889	14.2918	13.7027	13.9385	11.7101	14.3669	12.3359	10.2498	11.3295	11.2068	10.6814	TISSUE SPECIFICITY: Expressed in many tissues including in the brain, where the highest level of expression is found in the cerebellum and basal ganglia. {ECO:0000269|PubMed:28866611}.	2.93749	0.00948026	2.12124	+	3.89876	O14646;O14646-2	8	Chromodomain-helicase-DNA-binding protein 1;Isoform 2 of Chromodomain-helicase-DNA-binding protein 1	CHD1
14.9543	15.7072	16.5796	12.7027	16.2006	16.8811	14.3273	16.2322	15.6061	15.3833	15.1407	13.8046	15.0964	14.0226	13.8671	13.6558	12.9778	15.2032	15.0141	TISSUE SPECIFICITY: Frequently overexpressed in hepatomacellular carcinomas. {ECO:0000269|PubMed:18023026}.	1.18659	0.135974	1.0309		1.97225	Q86WJ1;Q86WJ1-2	14	Chromodomain-helicase-DNA-binding protein 1-like;Isoform 2 of Chromodomain-helicase-DNA-binding protein 1-like	CHD1L
14.7784	12.9666	15.8544	16.1005	14.5685	13.334	13.5437	14.2037	13.9903	15.5609	13.4411	13.3093	13.8479	14.0762	13.4014	13.3997	13.7305	14.6732	13.5008	NA	0.583059	0.380738	0.500024		1.16228	O14647;O14647-2	19	Chromodomain-helicase-DNA-binding protein 2;Isoform 2 of Chromodomain-helicase-DNA-binding protein 2	CHD2
13.7212	13.0803	14.0872	16.8871	14.0342	14.6017	12.4558	13.5909	13.5328	14.0116	13.0436	13.2326	13.6238	12.8957	11.9712	11.8663	12.3131	12.9544	12.7053	TISSUE SPECIFICITY: Widely expressed. {ECO:0000269|PubMed:9688266}.	1.80804	0.050921	1.23804	+	2.68805	Q12873;Q12873-3	14	Chromodomain-helicase-DNA-binding protein 3;Isoform 3 of Chromodomain-helicase-DNA-binding protein 3	CHD3
16.3541	15.3477	17.1063	17.2071	16.3828	17.117	15.5051	15.5849	15.3625	16.6325	15.1661	15.6991	15.1599	15.8415	15.3817	15.6271	15.2489	15.8191	14.9696	NA	1.40189	0.0962768	0.686674	+	2.22845	A0A0C4DGG9;A0A2R8Y212;A0A2R8Y425;A0A2R8Y521;A0A2R8Y5J0;A0A2R8YFK9;A0A2U3TZM0;F5GWX5;Q14839;Q14839-2	97	Chromodomain-helicase-DNA-binding protein 4;Chromodomain-helicase-DNA-binding protein 4;Chromodomain-helicase-DNA-binding protein 4 (Fragment);Chromodomain-helicase-DNA-binding protein 4;Chromodomain-helicase-DNA-binding protein 4;Chromodomain-helicase-DNA-binding protein 4;Chromodomain-helicase-DNA-binding protein 4;Chromodomain-helicase-DNA-binding protein 4;Chromodomain-helicase-DNA-binding pr…	CHD4
16.9103	15.466	16.7552	19.716	15.1464	15.8206	15.518	15.0931	16.4091	15.2583	15.0233	16.074	16.1728	13.9844	15.3333	16.0181	14.4324	15.7971	14.5311	NA	0.927681	0.213509	0.917859		1.64603	A0A2R8Y840;Q9HCK8;Q9HCK8-2	7	Chromodomain-helicase-DNA-binding protein 8 (Fragment);Chromodomain-helicase-DNA-binding protein 8;Isoform 2 of Chromodomain-helicase-DNA-binding protein 8	CHD8
16.0647	17.2668	17.5611	18.1823	16.3658	16.9701	17.6868	18.0111	17.3673	16.6477	17.8419	14.992	14.7487	16.5179	17.2029	17.6017	15.5274	15.972	16.1538	NA	1.09253	0.159189	0.833451		1.85642	Q8NE62	31	Choline dehydrogenase, mitochondrial	CHDH
13.0664	13.1335	15.6152	12.6414	15.73	17.1388	13.269	14.2483	12.9663	15.6401	13.7842	13.848	14.8252	15.158	14.7437	14.3174	13.6362	13.8799	13.406	TISSUE SPECIFICITY: High expression is found in testis, spleen, colon and peripheral blood leukocytes. Low expression is found in other tissues.	0.014471	0.975808	-0.0241322		-0.0416941	O96017;O96017-12;O96017-4;O96017-9	5	Serine/threonine-protein kinase Chk2;Isoform 12 of Serine/threonine-protein kinase Chk2;Isoform 4 of Serine/threonine-protein kinase Chk2;Isoform 9 of Serine/threonine-protein kinase Chk2	CHEK2
15.9461	15.6785	16.9378	17.3181	16.48	19.1758	16.3589	15.9623	16.338	16.5567	15.4461	16.2989	15.5873	16.8181	16.5033	16.347	15.9001	16.6289	15.4162	NA;TISSUE SPECIFICITY: Expressed in brain, placenta, lung, liver, kidney, pancreas, cardiac and skeletal muscle, and in cultured HEL and Dami cells. {ECO:0000269|PubMed:10794731}.	0.42957	0.493154	0.369896		0.917129	J3QK89;Q8IWX8	18	Calcium homeostasis endoplasmic reticulum protein	CHERP
14.1015	13.9679	13.1442	13.006	12.9139	14.4865	13.9013	11.1652	14.386	13.6452	12.1713	10.9152	11.5181	11.6622	9.65184	11.4514	10.4487	12.32	12.1232	TISSUE SPECIFICITY: Expressed in the adrenal medulla, and in pheochromocytoma. Not expressed in liver. {ECO:0000269|PubMed:3608978}.	2.54089	0.0166718	1.83958	+	3.47799	P05060	25	Secretogranin-1	CHGB
15.7721	14.1934	16.9731	16.403	14.7592	15.6698	15.1112	14.9256	15.3362	16.5713	14.8092	15.1145	15.53	14.679	13.7431	13.6714	15.1979	14.2519	14.7623	TISSUE SPECIFICITY: Expressed in cells of monocytic, T, B and epithelial origin. {ECO:0000269|PubMed:16357325, ECO:0000269|PubMed:20724479}.	1.60253	0.0702892	0.921947	+	2.45859	Q9BWS9	20	Chitinase domain-containing protein 1	CHID1
13.7538	11.4475	14.694	13.124	11.4573	12.3786	14.9574	11.3165	14.5056	15.2664	15.157	10.9329	14.0594	11.1034	14.7445	13.9125	13.8095	16.2159	15.0357	NA	0.557848	0.397576	-0.876583		-1.12362	A0A087X0M8	7	Neural cell adhesion molecule L1-like protein	CHL1
16.71	13.5845	13.9124	14.0916	14.933	16.1926	12.651	15.3456	14.4473	13.0758	15.2955	13.5703	14.6915	13.7801	12.8417	13.8726	14.0333	13.5826	13.7545	NA	0.732856	0.295987	0.690397		1.38158	P24386	3	Rab proteins geranylgeranyltransferase component A 1	CHM
15.8664	14.7089	16.0939	15.9965	14.6112	17.5847	15.3511	15.0125	15.4953	15.5001	14.9522	16.015	15.6796	14.784	15.0406	14.8043	14.7818	16.0284	15.1508	TISSUE SPECIFICITY: Expressed in placenta, cultured skin fibroblasts and in osteoblast cell line MG-63. {ECO:0000269|PubMed:8863740}.	0.628885	0.351957	0.417641		1.23116	Q9HD42	9	Charged multivesicular body protein 1a	CHMP1A
15.4565	15.8134	16.6841	14.1438	16.8359	19.1824	16.5626	17.3973	15.3906	17.5582	16.3666	15.6684	16.5741	16.5063	15.5137	15.7354	15.0538	16.8991	14.2783	TISSUE SPECIFICITY: Widely expressed. Expressed in pancreas, kidney, skeletal muscle, liver, lung, placenta and brain. {ECO:0000269|PubMed:11474171}.	0.556449	0.398513	0.62727		1.12146	Q7LBR1	6	Charged multivesicular body protein 1b	CHMP1B
17.0344	15.7685	16.7675	18.2922	16.4599	18.811	16.987	16.5616	17.0953	19.0466	16.8332	16.2008	16.7634	15.5195	16.398	16.0324	15.9764	16.7465	16.5725	NA	1.29084	0.114485	0.867851		2.0977	O43633	17	Charged multivesicular body protein 2a	CHMP2A
13.1189	13.808	13.5613	14.3844	13.6068	16.2389	13.9576	13.6949	13.8301	13.0702	13.2993	13.2302	13.4457	13.9422	13.7978	13.227	13.0928	14.8439	14.0395	TISSUE SPECIFICITY: Widely expressed. Expressed in brain, heart, skeletal muscle, spleen, kidney, liver, small intestine, pancreas, lung, placenta and leukocytes. In brain, it is expressed in cerebellum, cerebral cortex, medulla, spinal chord, occipital lobe, frontal lobe, temporal lobe and putamen. {ECO:0000269|PubMed:16041373}.	0.0458745	0.929546	0.0468832		0.127863	Q9UQN3;Q9UQN3-2	12	Charged multivesicular body protein 2b;Isoform 2 of Charged multivesicular body protein 2b	CHMP2B
16.3514	16.4201	16.8005	12.4746	18.1082	19.0045	17.1804	17.4398	17.9021	17.1095	17.108	16.9217	17.0275	16.7653	16.8884	16.0663	15.2585	17.4314	16.43	TISSUE SPECIFICITY: Widely expressed. Expressed in heart, brain, placenta, lung, liver, skeletal muscle, kidney and pancreas. {ECO:0000269|PubMed:15632132}.	0.228399	0.691534	0.349229		0.547699	Q9Y3E7	7	Charged multivesicular body protein 3	CHMP3
17.1745	14.8724	17.4134	18.0765	17.732	11.9564	13.1341	16.8856	12.5076	18.1986	16.5124	14.3194	11.1342	12.0522	9.95502	10.3561	12.3789	10.7546	13.8131	TISSUE SPECIFICITY: Widely expressed. Expressed at higher level in heart, kidney, liver and skeletal muscle. Also expressed in brain, placenta, lung and pancreas. {ECO:0000269|PubMed:14678797}.	3.48025	0.0045481	4.2399	+	4.47804	Q9BY43;Q9BY43-2	3	Charged multivesicular body protein 4a;Isoform 2 of Charged multivesicular body protein 4a	CHMP4A
17.0381	16.889	18.551	18.1178	17.7791	19.2882	16.2776	17.3106	16.737	17.9882	17.0676	16.6508	16.0703	17.3824	16.1495	16.7449	16.9343	17.5836	16.5574	TISSUE SPECIFICITY: Widely expressed. Expressed at higher level in heart and skeletal muscle. Also expressed in brain, colon, thymus, spleen, kidney, liver, small intestine, placenta, lung and peripheral blood lymphocytes. {ECO:0000269|PubMed:14678797}.	1.09968	0.157564	0.699977		1.86532	Q9H444	23	Charged multivesicular body protein 4b	CHMP4B
14.3639	11.4111	15.1468	15.4069	15.4646	13.7792	12.6246	14.5123	13.0248	14.6644	12.8989	11.326	10.4143	13.2886	10.1865	12.3078	11.1897	12.9228	11.72	TISSUE SPECIFICITY: Expressed in heart, spleen and kidney. {ECO:0000269|PubMed:14583093, ECO:0000269|PubMed:14678797}.	2.16012	0.0292052	2.00011	+	3.07133	Q96CF2	4	Charged multivesicular body protein 4c	CHMP4C
12.5693	15.2807	19.3987	13.8062	16.0042	17.657	15.6088	15.6639	18.8013	15.7458	14.499	16.1096	14.6008	16.1646	14.0925	15.9028	16.0297	16.5623	14.5982	NA	0.274593	0.642274	0.507147		0.638932	Q9NZZ3	7	Charged multivesicular body protein 5	CHMP5
15.7289	13.1377	17.1246	14.271	13.8769	15.7017	14.5337	13.7906	11.8201	14.9713	13.9002	13.9315	14.9825	13.4426	11.6297	10.6628	11.2766	9.9908	12.6732	NA;TISSUE SPECIFICITY: Ubiquitously expressed. {ECO:0000269|PubMed:15511219}.	2.30071	0.023471	2.30498	+	3.22211	I3L4A1;Q96FZ7	7	Charged multivesicular body protein 6 (Fragment);Charged multivesicular body protein 6	CHMP6
14.1382	12.7498	14.8458	14.4801	14.1692	14.8564	12.9781	13.1558	14.3326	14.6525	13.5397	12.613	10.723	10.6325	12.8843	12.4853	13.0217	11.0038	13.7371	NA	2.8348	0.0109197	1.80624	+	3.78981	Q8WUX9	7	Charged multivesicular body protein 7	CHMP7
16.2594	16.354	17.4361	16.7992	16.2985	17.7145	15.5079	15.382	16.1516	16.6242	15.1578	15.8668	16.0171	15.4597	16.3218	15.5481	15.7327	16.1314	15.5442	TISSUE SPECIFICITY: Underexpressed in many breast and lung cancers. {ECO:0000269|PubMed:20230755}.	0.832561	0.249943	0.473851		1.5194	Q9UHD1	13	Cysteine and histidine-rich domain-containing protein 1	CHORDC1
15.1872	14.0803	16.6749	13.7997	15.0092	18.0956	15.915	14.7866	16.6751	16.6082	15.2274	15.418	13.8969	13.807	13.935	13.7753	12.3432	14.333	14.9152	TISSUE SPECIFICITY: Ubiquitously expressed. Has been found in fetal eye, lung, liver, muscle, heart, kidney, thymus and spleen. {ECO:0000269|PubMed:8901634}.	2.47154	0.0185261	1.76516	+	3.40426	Q99653	19	Calcineurin B homologous protein 1	CHP1
11.5672	14.6118	13.269	13.2864	14.3725	18.6915	13.4165	15.2285	12.8335	13.2208	12.9629	15.2283	11.9686	17.4612	16.4274	15.6413	17.3121	15.8046	11.2217	NA;TISSUE SPECIFICITY: Expressed in all tissues tested, including, heart, brain, placenta, lung, liver, skeletal muscle, kidney and pancreas.	0.525101	0.419376	-1.06217		-1.07254	E5RGS9;Q9NRG0	1	Chromatin accessibility complex protein 1	CHRAC1
12.0082	13.5048	13.1975	13.1003	12.495	14.447	13.4489	11.9319	12.1155	13.3907	11.3893	12.6693	11.5168	11.4354	12.1628	12.1776	12.0845	12.1133	9.41512	TISSUE SPECIFICITY: Expressed in an erythroid progenitor cell line derived from peripheral blood. Expressed in glioblastoma cells (PubMed:25284789). {ECO:0000269|PubMed:20688955, ECO:0000269|PubMed:25284789}.	1.9874	0.0379349	1.25027	+	2.88453	Q9Y3Y2;Q9Y3Y2-3;Q9Y3Y2-4	5	Chromatin target of PRMT1 protein;Isoform 2 of Chromatin target of PRMT1 protein;Isoform 3 of Chromatin target of PRMT1 protein	CHTOP
13.8814	12.9234	14.7504	15.6458	12.9779	13.0071	13.9565	13.577	14.1993	16.0675	13.5891	13.5903	14.6055	12.8312	12.9243	13.0255	12.7643	13.73	12.2671	TISSUE SPECIFICITY: Widely expressed.	1.13703	0.147742	0.849841		1.91156	O15111	10	Inhibitor of nuclear factor kappa-B kinase subunit alpha	CHUK
14.4162	15.1785	15.0323	15.0252	15.9817	17.7119	15.7715	15.4969	16.3686	16.3353	15.6522	14.9946	14.2163	15.5658	15.2152	14.3079	14.1967	12.4872	14.1182	NA	2.22904	0.026119	1.36269	+	3.14537	O76071	13	Probable cytosolic iron-sulfur protein assembly protein CIAO1	CIAO1
16.5159	15.1194	18.2097	14.0533	16.6307	16.5443	16.1162	16.0073	12.3864	13.236	17.2657	14.0034	15.4021	15.7262	13.5791	14.941	13.4061	14.8054	14.5389	TISSUE SPECIFICITY: Substantially enriched in macrophages. {ECO:0000269|PubMed:22683786}.	0.628639	0.351992	0.87897		1.23079	Q9H5X1	4	Cytosolic iron-sulfur assembly component 2A	CIAO2A
15.7229	14.7196	16.1096	15.5479	14.1997	15.5449	13.7856	14.7719	12.6074	12.77	14.7702	13.2221	12.6564	13.7835	13.263	12.7793	13.1877	13.1085	11.6347	NA	2.27884	0.0241042	1.56484	+	3.19872	Q9Y3D0	4	Cytosolic iron-sulfur assembly component 2B	CIAO2B
15.4657	15.7386	15.6896	16.2548	15.5208	16.514	15.3952	15.9642	15.5275	16.3265	15.4987	14.9052	15.6132	15.725	15.2285	14.749	15.9621	15.2856	14.9231	TISSUE SPECIFICITY: Ubiquitously expressed. Highly expressed in heart, liver and pancreas. {ECO:0000269|PubMed:14970183}.	1.02003	0.182167	0.378172		1.76515	Q6FI81;Q6FI81-3	19	Anamorsin;Isoform 3 of Anamorsin	CIAPIN1
15.2104	14.4092	14.9314	15.9064	15.6549	15.2263	14.1622	13.9049	15.169	15.91	14.46	11.7254	14.0286	12.5985	12.3527	13.2467	12.5949	14.251	12.6114	TISSUE SPECIFICITY: Ubiquitously expressed. Expressed in the epidermis, hair follicles and keratinocytes (PubMed:30068544). Detected in platelets and in cell lines of megakaryocytic and erythrocytic lineages. Both isoform 1 and isoform 2 are detected in various cancer cell lines, with isoform 2 being the predominant form (at protein level). {ECO:0000269|PubMed:10477286, ECO:0000269|PubMed:1185631…	2.38728	0.0206836	1.62482	+	3.31454	Q99828;Q99828-2	12	Calcium and integrin-binding protein 1;Isoform 2 of Calcium and integrin-binding protein 1	CIB1
11.8099	12.4371	12.2699	13.5808	12.3798	11.4216	11.4546	12.344	12.8743	13.0478	12.9837	11.9791	11.6999	11.9205	12.1953	10.1126	12.4478	12.3472	12.0486	NA	0.930425	0.212521	0.557328		1.64962	I3L2J0	4	Protein capicua homolog	CIC
12.2593	12.9711	12.5327	13.1032	11.842	13.0211	9.83047	11.2821	12.6997	12.5019	11.3778	11.4829	14.432	11.3095	13.9275	12.7243	11.4311	11.4088	11.4505	NA;TISSUE SPECIFICITY: Expressed mainly in adipose tissue, small intestine, heart, colon and stomach and, at lower levels, in brain, kidney and liver. {ECO:0000269|PubMed:12429024, ECO:0000269|PubMed:18334488}.	0.247933	0.671343	-0.308024		-0.58684	A0A0A0MRY9;Q96AQ7;Q96AQ7-2;Q96AQ7-4	1	Cell death activator CIDE-3;Cell death activator CIDE-3;Isoform 2 of Cell death activator CIDE-3;Isoform 4 of Cell death activator CIDE-3	CIDEC
15.2273	11.6262	17.6156	13.3053	15.8456	17.0062	14.3299	14.0756	12.6826	12.0941	14.5669	5.4763	15.1569	14.036	15.0464	14.4957	14.8504	10.5404	5.85754	NA;TISSUE SPECIFICITY: Expressed at low levels in most of the tissues. Overexpressed in head-and-neck squamous cell carcinomas (HNSCC). Present in liver cancer cells (at protein level). {ECO:0000269|PubMed:12118381, ECO:0000269|PubMed:17632056}.	0.211373	0.711398	0.799515		0.512861	A0A087X211;Q8TCG1;Q8TCG1-2	4	Protein CIP2A;Protein CIP2A;Isoform 2 of Protein CIP2A	CIP2A
15.8689	17.9088	16.8228	18.4296	16.3243	18.3466	17.1142	16.5467	16.6726	16.9224	15.8968	16.113	16.9685	15.2312	16.7728	15.9992	17.0653	15.3581	15.9709	TISSUE SPECIFICITY: Ubiquitous.	1.0404	0.175558	0.718752		1.79099	Q14011	13	Cold-inducible RNA-binding protein	CIRBP
15.35	15.4511	13.6694	15.5472	15.3146	17.3665	15.8242	15.5348	16.7188	13.7578	15.8555	16.4915	14.8613	16.3422	13.9849	15.1102	11.9175	14.4127	14.7359	TISSUE SPECIFICITY: Expression is reduced in cells derived from cystic fibrosis patients. {ECO:0000269|PubMed:18047834}.	1.17326	0.139201	1.0928		1.956	Q9NZ45	8	CDGSH iron-sulfur domain-containing protein 1	CISD1
17.5899	17.404	17.249	17.2196	16.7478	17.9602	17.2485	16.8085	17.4561	17.216	16.7827	17.8114	16.2933	15.2877	15.5052	15.5431	12.9239	13.8739	15.7365	TISSUE SPECIFICITY: Testis, small intestine, kidney, lung, brain, heart, pancreas and platelets. {ECO:0000269|PubMed:17846994}.	5.00927	0.000363636	2.26776	+	6.19503	Q8N5K1	7	CDGSH iron-sulfur domain-containing protein 2	CISD2
13.3953	11.2959	14.0727	14.4044	13.4364	16.7946	12.8631	12.7789	12.8667	13.0389	12.5236	12.8422	12.5336	12.9526	12.6057	12.8819	13.1736	13.4592	11.8313	NA	0.540466	0.409082	0.582555		1.09663	F5H2X7;H0Y5D5;Q5SYW2;Q9BTG3;Q9ULV3;Q9ULV3-2;Q9ULV3-5	4	Cip1-interacting zinc finger protein;Cip1-interacting zinc finger protein (Fragment);Cip1-interacting zinc finger protein;CIZ1 protein;Cip1-interacting zinc finger protein;Isoform 2 of Cip1-interacting zinc finger protein;Isoform 5 of Cip1-interacting zinc finger protein	CIZ1
18.2989	17.9865	20.3466	19.1504	18.6033	19.0353	18.4004	18.4931	18.5299	20.2526	18.7466	18.0444	17.8186	17.0322	17.4614	17.1709	18.0128	17.4997	17.5767	NA	3.25577	0.00596811	1.3137	+	4.23746	Q07065	86	Cytoskeleton-associated protein 4	CKAP4
15.445	15.2624	16.3547	16.3719	15.7097	15.268	15.2256	15.1139	15.9936	16.5343	15.1517	15.3836	15.1183	15.2791	15.0252	14.7026	14.7522	14.8489	14.5346	highly expressed in the Purkinje cell bodies of the cerebellum. {ECO:0000269|PubMed:8536682, ECO:0000269|PubMed:8832653}.;TISSUE SPECIFICITY: Overexpressed in hepatomas and colonic tumors. Also expressed in skeletal muscle, brain, heart, placenta, lung, liver, kidney and pancreas. Expression is elevated in the brain	2.59201	0.0153646	0.756782	+	3.53228	Q14008	69	Cytoskeleton-associated protein 5	CKAP5
19.2526	19.6598	20.6683	20.2249	18.8738	20.4851	19.7558	22.2198	21.0391	22.0827	21.2698	16.0684	17.709	19.7008	19.8573	20.6547	21.7613	20.2608	22.7389	NA	0.124002	0.82069	-0.249919		-0.321676	P12277	83	Creatine kinase B-type	CKB
16.5394	16.1943	16.9205	17.6605	16.8936	17.6323	17.1483	17.3626	17.3394	18.023	17.1864	15.1144	14.3036	17.4094	16.8315	16.4048	15.9546	16.5549	15.6968	NA	1.24765	0.123209	0.836135		2.04607	P12532	69	Creatine kinase U-type, mitochondrial	CKMT1A
15.222	12.9111	16.2417	14.7766	15.8736	14.9655	11.4674	13.9738	14.9706	12.999	12.6935	11.0169	11.1968	12.3826	14.0562	13.2394	14.2629	10.8904	10.8585	NA	1.17926	0.137596	1.51358		1.96332	P61024	4	Cyclin-dependent kinases regulatory subunit 1	CKS1B
14.1099	13.5351	14.8483	15.6925	14.2378	14.901	13.9858	13.6376	13.8468	14.7729	13.2329	13.7258	13.4631	14.0854	12.9282	13.082	13.9764	13.625	13.5889	NA	1.43658	0.0913164	0.674975	+	2.26876	F8WA11;Q7Z460;Q7Z460-2;Q7Z460-3;Q7Z460-4;Q7Z460-5	23	CLIP-associating protein 1;CLIP-associating protein 1;Isoform 2 of CLIP-associating protein 1;Isoform 3 of CLIP-associating protein 1;Isoform 4 of CLIP-associating protein 1;Isoform 5 of CLIP-associating protein 1	CLASP1
13.7887	12.5909	14.0966	14.1053	13.6314	14.0207	13.3407	12.3697	13.5747	13.5408	12.8965	13.1069	9.00601	12.774	11.3166	11.699	12.2069	12.0951	12.276	NA;TISSUE SPECIFICITY: Brain-specific.	3.34332	0.00536735	1.7971	+	4.33108	E3W994;J3KR49;O75122	25	CLIP-associating protein 2	CLASP2
11.9827	11.8729	12.5933	12.489	12.957	13.7526	12.8261	12.4762	12.7051	13.8673	11.2863	12.8079	12.1024	13.0444	12.4256	11.0677	13.8979	12.33	11.059	NA	0.418319	0.502603	0.359378		0.898123	A0A0A0MQS2;F5H0Q6;Q8N2M8;Q8N2M8-3	3	CLK4-associating serine/arginine-rich protein;CLK4-associating serine/arginine-rich protein;CLK4-associating serine/arginine rich protein;Isoform 2 of CLK4-associating serine/arginine rich protein	CLASRP
19.6082	18.6691	14.9379	16.4741	17.1466	20.1104	18.8444	17.0219	19.2487	14.3421	16.5309	17.431	18.0684	15.0327	17.1245	16.4487	15.999	16.2175	15.4957	TISSUE SPECIFICITY: Expressed abundantly in the bone marrow. Expressed exclusively by eosinophils and basophils. Not detected in monocytes and neutrophils. Expressed in CD25-positive regulatory T-cells (Treg) (at protein level). Found in intestinal tissue from patients with Celiac disease, expression is directly related to the histological grade of mucosal damage and to the number of eosinophils …	0.878581	0.231633	1.1895		1.5812	Q05315	14	Galectin-10	CLC
15.0873	15.2026	19.7623	13.5813	15.0539	18.3606	20.3745	19.5927	20.8956	18.7951	21.1036	10.5145	13.5308	13.7125	20.8318	21.3355	19.8786	13.297	19.2115	TISSUE SPECIFICITY: Highly expressed in small intestine and colon namely in intestinal basal crypt epithelia and goblet cells, and appendix. Weakly expressed in uterus, testis and kidney. Expressed in the airways epithelium of both asthmatic and healthy patients. Expressed in the bronchial epithelium, especially in mucus-producing goblet cells. Expressed in normal turbinate mucosa and nasal polyp…	0.00815878	0.985399	-0.0393621		-0.023673	A8K7I4	82	Calcium-activated chloride channel regulator 1	CLCA1
12.6223	17.5662	18.1872	13.664	16.2035	20.7432	18.3942	18.5797	18.2063	18.3878	18.3728	10.796	14.2532	14.798	17.9106	17.715	17.0677	18.7585	17.0895	TISSUE SPECIFICITY: Primarily expressed in the digestive tract, mainly in colon. Detected in smaller amounts in brain, urogenital organs, testis, and salivary and mammary glands. Highly expressed in the epithelial layer and submucosal gland of the inferior turbinate mucosa. Lower levels in the epithelial layer of nasal polyp. {ECO:0000269|PubMed:10437792, ECO:0000269|PubMed:15490240, ECO:0000269|…	0.00319593	0.994242	0.0113322		0.00932536	Q14CN2	22	Calcium-activated chloride channel regulator 4	CLCA4
13.0689	14.258	14.5367	14.2551	13.1199	16.0864	13.234	13.0936	12.4021	15.1587	13.136	13.8173	12.2191	12.2524	11.7005	12.2873	11.0887	11.3388	12.2632	TISSUE SPECIFICITY: Expressed in the retina of the eye, with extensive expression in the lamina cribrosa, optic nerve, ganglion cell layer, inner nuclear layer, outer nuclear layer and retinal pigment epithelium. {ECO:0000269|PubMed:30157172}.	3.59803	0.00359609	1.96867	+	4.60505	Q96S66	14	Chloride channel CLIC-like protein 1	CLCC1
13.6237	11.4122	13.5857	13.4552	12.5343	12.239	13.5419	12.992	14.8235	13.2401	13.6736	13.7625	11.2467	13.7457	13.4131	13.1796	13.5115	14.1058	12.214	TISSUE SPECIFICITY: Ubiquitously expressed. Moderately expressed in aortic and coronary vascular smooth muscle cells and expressed at a low level in aortic endothelial cells. Expressed in the adrenal gland, predominantly in the zona glomerulosa (PubMed:29403011). {ECO:0000269|PubMed:10198195, ECO:0000269|PubMed:29403011}.	0.165909	0.768824	0.18081		0.416185	P51788;P51788-4	5	Chloride channel protein 2;Isoform 4 of Chloride channel protein 2	CLCN2
12.5693	14.3298	14.906	14.8958	13.3402	1.54027	14.7162	13.8897	13.5279	14.9902	13.305	12.297	12.3991	12.6918	11.2904	11.7235	12.6451	10.9032	11.4446	NA;TISSUE SPECIFICITY: Expressed primarily in tissues derived from neuroectoderm. Within the brain, its expression is particularly evident in the hippocampus, olfactory cortex, and olfactory bulb. Highly expressed in aortic and coronary vascular smooth muscle cells, and aortic endothelial cells. Also expressed in tracheal and alveolar epithelial cells, and intima and media of the pulmonary vessel…	0.303959	0.612413	0.987843		0.694684	A0A087WU31;A0A0A0MTB7;P51790;P51790-2;P51790-4;P51790-5	6	Chloride channel protein;Chloride channel protein;H(+)/Cl(-) exchange transporter 3;Isoform 2 of H(+)/Cl(-) exchange transporter 3;Isoform 3 of H(+)/Cl(-) exchange transporter 3;Isoform 4 of H(+)/Cl(-) exchange transporter 3	CLCN3
14.3864	12.5033	11.8241	13.294	13.747	12.582	11.6032	14.0249	12.765	14.3261	12.612	12.4063	11.3081	10.1123	12.2338	11.5772	10.8793	11.535	11.1316	TISSUE SPECIFICITY: Brain and kidney. {ECO:0000269|PubMed:31155284}.	3.34473	0.00540206	1.7523	+	4.33259	P51798;P51798-2	6	H(+)/Cl(-) exchange transporter 7;Isoform 2 of H(+)/Cl(-) exchange transporter 7	CLCN7
14.7462	14.9295	16.4578	14.5857	16.0356	18.0294	14.8045	14.2446	14.8872	16.018	13.9827	15.1663	11.1397	15.4435	14.5636	14.8611	13.657	15.574	13.6884	NA	1.1709	0.139717	1.19149		1.95312	O15551	5	Claudin-3	CLDN3
11.5836	16.0546	13.5454	13.1746	12.1234	12.0058	14.6888	12.1909	13.6923	12.4711	11.691	12.3474	11.9516	15.9673	14.3584	15.5728	14.8835	10.3763	15.4276	NA;TISSUE SPECIFICITY: Expressed in kidney, lung and prostate. Isoform 1 seems to be predominant, except in some normal prostate samples, where isoform 2 is the major form. Down-regulated in breast cancers, including ductal carcinoma in situ (DCIS), lobular carcinoma in situ (LCIS) and invasive ductal carcinoma (IDC) (at protein level), as well as in several cancer cell lines. Loss of expression …	0.757607	0.283678	-1.11271		-1.41634	F5H496;I3L3M4;I3L3X1;K7EL87;K7EP40;O95471;O95471-2	1	Claudin;Claudin;Claudin (Fragment);Claudin;Claudin (Fragment);Claudin-7;Isoform 2 of Claudin-7	CLDN7
11.2517	11.4475	15.786	12.8455	13.0387	15.5468	11.9639	11.2475	12.6917	12.9332	11.2482	11.4685	12.6307	11.8705	11.2998	11.3891	12.8106	13.7923	11.298	TISSUE SPECIFICITY: Expressed in skeletal tissues including bone marrow, chondrocytes, primary ossification center-associated cells, the perichondrium and periosteum. Lower levels of expression were detected in spleen, thymus, appendix and fetal liver. {ECO:0000269|PubMed:11803813, ECO:0000269|PubMed:11920266, ECO:0000269|PubMed:9442024, ECO:0000269|PubMed:9705843}.	0.308128	0.607444	0.466592		0.702468	Q9Y240	4	C-type lectin domain family 11 member A	CLEC11A
14.3249	16.1118	12.7076	13.1765	16.0555	17.0891	17.7947	17.1186	11.7933	16.6233	16.6201	16.7819	17.0735	16.5495	17.7644	18.4924	16.5084	17.6688	16.9133	TISSUE SPECIFICITY: Detected in normal myeloid cells and in acute myeloid leukemia cells. Detected in neutrophils, eosinophils, monocytes and dendritic cells. Detected in spleen macrophage-rich red pulp and in lymph node (at protein level). Detected in peripheral blood leukocytes, dendritic cells, bone marrow, monocytes, mononuclear leukocytes and macrophages. {ECO:0000269|PubMed:14739280, ECO:00…	1.41048	0.0950399	-1.76502	+	-2.23845	Q5QGZ9;Q5QGZ9-1;Q5QGZ9-4;Q5QGZ9-5	1	C-type lectin domain family 12 member A;Isoform 1 of C-type lectin domain family 12 member A;Isoform 4 of C-type lectin domain family 12 member A;Isoform 5 of C-type lectin domain family 12 member A	CLEC12A
15.1275	15.55	12.6999	17.2839	15.5912	17.0002	15.1485	14.4458	12.4906	16.2664	14.5634	15.1637	16.9523	15.2277	15.5186	14.8102	15.1405	17.4171	15.8269	NA;TISSUE SPECIFICITY: Found in plasma.	0.589586	0.376809	-0.730987		-1.17219	E9PHK0;P05452	6	Tetranectin	CLEC3B
18.5004	19.5094	19.7062	19.7125	19.8795	20.9079	18.5208	18.5925	18.5994	19.4341	17.9835	18.3114	18.5291	19.386	18.834	18.7178	19.9511	19.5587	18.5002	TISSUE SPECIFICITY: Expression is prominent in heart, placenta, liver, kidney and pancreas. {ECO:0000269|PubMed:10793131}.	0.0710588	0.89246	0.0700047		0.193234	O00299	30	Chloride intracellular channel protein 1	CLIC1
14.9486	14.9079	15.412	16.7601	14.2414	15.4592	15.466	14.4687	14.7984	15.6284	14.8309	15.1807	16.5179	13.8068	13.9845	14.8636	13.8732	10.894	14.3114	TISSUE SPECIFICITY: Expressed in adult and fetal brain, heart, skeletal muscle, liver, lung, and spleen. Detected in adult stomach and testis. Expressed in fetal thymus and kidney. {ECO:0000269|PubMed:15147738, ECO:0000269|PubMed:22814392}.	1.3153	0.110124	1.13927	+	2.12674	O15247	13	Chloride intracellular channel protein 2	CLIC2
17.0139	17.3304	18.6313	18.5481	17.1106	19.047	16.9045	16.8214	16.8625	18.2457	17.0935	18.1096	17.7072	16.8383	17.4403	17.3333	17.27	17.8856	18.4802	TISSUE SPECIFICITY: Detected in epithelial cells from colon, esophagus and kidney (at protein level). Expression is prominent in heart, kidney, placenta and skeletal muscle. {ECO:0000269|PubMed:10793131, ECO:0000269|PubMed:17200346, ECO:0000269|PubMed:17636002}.	0.0846455	0.873584	0.078219		0.227284	Q9Y696	23	Chloride intracellular channel protein 4	CLIC4
12.62	11.9235	13.498	11.4632	13.3685	13.6553	10.75	10.834	13.606	12.1768	12.5831	11.6584	12.9084	11.1057	11.328	12.3601	11.5773	12.4353	10.6	NA;TISSUE SPECIFICITY: Widely expressed in both fetal and adult human tissues (PubMed:24781754). Isoform 1 is expressed in renal glomeruli endothelial cells and podocytes (at protein level). {ECO:0000269|PubMed:20335315, ECO:0000269|PubMed:24781754}.	0.648408	0.340913	0.585467		1.25999	A0A2R8Y4M1;A0A2R8Y615;A0A2R8YGW2;A0A5F9ZHK1;Q9NZA1;Q9NZA1-2;Q9NZA1-3	3	Chloride intracellular channel protein 5;Chloride intracellular channel protein;Chloride intracellular channel protein 5;Chloride intracellular channel protein 5;Chloride intracellular channel protein 5;Isoform 1 of Chloride intracellular channel protein 5;Isoform 3 of Chloride intracellular channel protein 5	CLIC5
13.5109	13.9021	14.7022	12.9902	11.865	12.7453	12.4659	13.1427	13.9983	14.1871	14.2877	12.7113	15.2834	10.3426	11.2052	11.9851	12.1806	12.5169	10.121	TISSUE SPECIFICITY: Expressed in brain, placenta, pancreas and liver. {ECO:0000269|PubMed:12226712}.	1.57303	0.0732613	1.42792	+	2.42517	Q96NY7;Q96NY7-2	14	Chloride intracellular channel protein 6;Isoform A of Chloride intracellular channel protein 6	CLIC6
15.1329	15.6284	14.9344	15.0013	15.3122	17.5946	15.5206	15.5014	15.6715	15.95	15.1378	14.286	14.705	15.3963	15.2807	14.6976	15.6243	14.6773	14.509	TISSUE SPECIFICITY: Ubiquitously expressed at low to intermediate levels. {ECO:0000269|PubMed:12429846, ECO:0000269|PubMed:12538641}.	0.80781	0.260785	0.488296		1.48571	Q14677	41	Clathrin interactor 1	CLINT1
14.0333	14.3562	15.6651	14.8554	13.9074	15.2191	13.7349	13.4058	14.4174	15.1598	13.5508	13.5377	13.7863	13.4683	13.4825	13.6149	14.076	13.1729	13.9706	TISSUE SPECIFICITY: Detected in dendritic cells (at protein level). Highly expressed in the Reed-Sternberg cells of Hodgkin disease. {ECO:0000269|PubMed:12433698, ECO:0000269|PubMed:1600942}.	1.38645	0.0982293	0.667182	+	2.21044	P30622-2	58	Isoform 3 of CAP-Gly domain-containing linker protein 1	CLIP1
14.2463	13.5118	14.762	15.1317	13.8616	15.4984	13.8798	13.0429	14.2531	14.1266	13.8833	13.3625	12.4986	12.9862	13.2839	12.9392	14.0963	13.21	12.2763	NA	2.45859	0.0187702	1.08848	+	3.39049	Q9UDT6;Q9UDT6-2	29	CAP-Gly domain-containing linker protein 2;Isoform 2 of CAP-Gly domain-containing linker protein 2	CLIP2
14.3854	15.0657	14.7102	13.7716	14.6193	16.4562	15.3221	14.9173	15.8203	16.3868	15.3297	13.2411	14.3526	13.5047	14.1776	14.7042	14.7096	14.8271	13.3726	TISSUE SPECIFICITY: Widely expressed at intermediate level. {ECO:0000269|PubMed:10574461}.	1.12746	0.150515	0.766649		1.89975	Q96JQ2	29	Calmin	CLMN
15.9034	16.7724	16.1016	16.504	14.9581	17.742	15.2684	14.4587	15.9679	17.027	14.3572	15.8862	16.6894	17.2208	13.7369	14.3278	15.6725	16.6322	11.5935	NA;TISSUE SPECIFICITY: Ubiquitous.	0.566895	0.391936	0.787529		1.13756	A0A024R644;A0A1B0GWI2;O75503	1	Ceroid-lipofuscinosis neuronal protein 5;Ceroid-lipofuscinosis neuronal protein 5 (Fragment);Ceroid-lipofuscinosis neuronal protein 5	CLN5
14.9945	14.6998	15.5642	15.5465	15.193	16.5475	14.3768	14.8652	14.955	16.0307	13.9716	14.8225	14.508	14.1548	14.2415	14.4429	14.361	14.9363	13.7928	TISSUE SPECIFICITY: Widely expressed (at protein level) (PubMed:25597511). Expressed in fetal, as well as in adult tissues, with highest levels in adult brain, including thalamus, hippocampus, occipital cortex and parietal cortex. Low expression in granulocytes (PubMed:25597510). {ECO:0000269|PubMed:25597510, ECO:0000269|PubMed:25597511}.	1.83434	0.0488212	0.782418	+	2.71705	Q9H078-2	19	Isoform 2 of Caseinolytic peptidase B protein homolog	CLPB
15.6409	14.6947	14.7588	16.4471	15.2322	15.9471	14.4086	15.042	14.7061	15.746	15.0939	13.8358	13.7229	14.0414	12.9945	14.2772	14.2005	13.73	13.2609	TISSUE SPECIFICITY: Detected in liver (at protein level). Predominantly expressed in skeletal muscle. Intermediate levels in heart, liver and pancreas. Low in brain, placenta, lung and kidney. {ECO:0000269|PubMed:10525407, ECO:0000269|PubMed:8543061}.	3.48719	0.00447953	1.38267	+	4.4855	Q16740	14	ATP-dependent Clp protease proteolytic subunit, mitochondrial	CLPP
14.7996	15.809	16.2783	15.0229	15.5091	16.1757	14.5979	13.7136	15.0313	15.9304	13.3302	13.8405	13.4697	13.6249	12.9658	12.1029	11.532	14.2329	12.6419	TISSUE SPECIFICITY: Widely expressed. {ECO:0000269|PubMed:9828125}.	3.47973	0.00453488	2.06461	+	4.47747	O96005	11	Cleft lip and palate transmembrane protein 1	CLPTM1
14.4765	14.6056	16.2196	15.26	13.5085	12.2223	14.0766	13.9055	14.7941	15.7906	13.7134	14.8494	13.9534	12.3826	12.3235	12.5806	12.0008	12.7307	13.0322	NA	2.91035	0.00983784	1.737	+	3.86995	G5E9Z2	14	Cisplatin resistance related protein CRR9p, isoform CRA_c	CLPTM1L
15.0999	14.5176	16.5345	16.7012	15.2609	17.2886	14.8424	14.9747	15.6109	15.7314	14.4368	15.4284	14.4359	15.519	14.554	14.8936	13.6802	14.2896	14.2507	TISSUE SPECIFICITY: Higher expression in skeletal muscle and heart and to a lesser extent in liver, brain, placenta, lung, kidney and pancreas. {ECO:0000269|PubMed:11003706}.	1.80978	0.0507858	1.01806	+	2.68997	O76031	16	ATP-dependent Clp protease ATP-binding subunit clpX-like, mitochondrial	CLPX
13.4408	14.417	14.4207	13.6074	12.7302	16.8916	11.9509	11.8798	11.682	14.4489	12.1202	12.696	14.2821	12.9789	13.408	12.3042	12.7961	14.7539	9.07901	TISSUE SPECIFICITY: Expressed in the brain and, a lower level, in the heart, skeletal muscle, kidney and placenta. Accumulates in dystrophic neurites around the amyloid core of Alzheimer disease senile plaques (at protein level). {ECO:0000269|PubMed:12498782, ECO:0000269|PubMed:12972431}.	0.31377	0.601184	0.556816		0.712956	O94985;O94985-2	5	Calsyntenin-1;Isoform 2 of Calsyntenin-1	CLSTN1
16.8535	15.5429	19.4336	17.9136	16.1584	17.383	15.778	16.7491	16.3832	18.9703	16.4694	16.2565	16.4428	15.6692	15.8132	15.6994	16.2086	15.9444	16.1285	NA	1.30789	0.111253	1.00437	+	2.11796	P09496-2	21	Isoform Non-brain of Clathrin light chain A	CLTA
18.2132	18.9496	18.1835	19.2076	17.5132	21.4168	18.0682	18.5364	18.5615	19.4702	18.2187	18.2069	18.2936	17.539	17.7251	17.7505	18.5672	17.5402	17.8049	NA	1.25676	0.121261	0.823502		2.057	P09497-2	19	Isoform Non-brain of Clathrin light chain B	CLTB
17.4813	17.5843	18.4513	18.1658	17.7749	18.7538	17.4952	17.9356	17.8531	19.1538	17.7828	17.6274	17.8415	17.5561	17.2569	17.1631	17.6324	17.8865	17.5814	NA	1.25457	0.121835	0.445246		2.05437	A0A087WVQ6;Q00610;Q00610-2	226	Clathrin heavy chain;Clathrin heavy chain 1;Isoform 2 of Clathrin heavy chain 1	CLTC
16.312	14.9168	17.396	20.1888	15.7679	17.2529	15.1676	15.3784	14.9164	16.9528	15.9602	15.0688	17.962	15.8469	16.9468	16.3713	17.3153	19.0708	17.0625	TISSUE SPECIFICITY: Detected in blood plasma, cerebrospinal fluid, milk, seminal plasma and colon mucosa. Detected in the germinal center of colon lymphoid nodules and in colon parasympathetic ganglia of the Auerbach plexus (at protein level). Ubiquitous. Detected in brain, testis, ovary, liver and pancreas, and at lower levels in kidney, heart, spleen and lung. {ECO:0000269|PubMed:11123922, ECO:…	0.784709	0.270653	-0.95188		-1.45397	P10909;P10909-2;P10909-4;P10909-5;P10909-6	18	Clusterin;Isoform 2 of Clusterin;Isoform 4 of Clusterin;Isoform 5 of Clusterin;Isoform 6 of Clusterin	CLU
15.5429	15.6413	16.4435	15.9764	15.5191	17.0912	14.871	15.9639	15.9519	17.0419	14.7834	14.6816	14.1479	15.6678	15.1769	15.341	15.2426	15.9271	14.0858	NA	1.15779	0.143156	0.70819		1.93707	A0A494C0R8	38	Clustered mitochondria protein homolog	CLUH
14.7764	14.5707	16.3934	17.4273	14.0417	15.1611	15.5327	14.8451	16.3816	15.4976	16.0327	14.4573	14.5772	16.1803	14.9575	15.4031	14.5461	16.1147	14.3661	NA	0.25868	0.659659	0.262921		0.608016	Q8N0X4	15	Citramalyl-CoA lyase, mitochondrial	CLYBL
11.7754	12.7562	13.6357	12.4635	11.6767	18.105	16.4114	11.8653	16.8125	12.134	14.7326	13.1689	14.1278	11.2298	14.9806	14.7296	12.7636	13.5048	17.3415	TISSUE SPECIFICITY: Mast cells in lung, heart, skin and placenta. Expressed in both normal skin and in urticaria pigmentosa lesions. {ECO:0000269|PubMed:8144971}.	0.115079	0.832772	-0.302038		-0.30079	P23946	13	Chymase	CMA1
15.744	17.0171	17.0648	17.2976	16.2675	18.4498	17.5816	16.9716	18.2435	17.5596	17.1718	16.2865	16.2628	16.2587	16.5364	17.2797	19.0596	17.8368	16.4518	TISSUE SPECIFICITY: Ubiquitously expressed. Expressed in pancreas, kidney, liver, skeletal muscle, lung, placenta, brain, heart, colon, PBL, small intestine, ovary, testis, prostate, thymus and spleen. {ECO:0000269|PubMed:11602804}.	0.0335644	0.947993	0.0399742		0.0947438	Q8NFW8	25	N-acylneuraminate cytidylyltransferase	CMAS
16.8158	16.5126	16.4623	17.1953	16.5951	18.4417	17.0508	17.0945	17.7703	18.267	18.0531	14.3494	15.7753	17.0321	17.3171	16.6503	16.966	17.4658	16.7706	TISSUE SPECIFICITY: Widely expressed, with highest levels in liver, followed by kidney, small intestine and colon. Present in liver and intestine (at protein level). {ECO:0000269|PubMed:20177059}.	0.177072	0.754077	0.196766		0.440446	Q96DG6	17	Carboxymethylenebutenolidase homolog	CMBL
14.3629	15.3062	13.6537	13.699	15.2493	15.9141	14.5522	14.4748	15.5179	12.8846	14.2941	14.6546	14.3908	12.6011	14.2585	14.9872	13.5124	14.9079	15.0298	NA	0.323742	0.590618	0.30584		0.731355	Q7Z7K0	9	COX assembly mitochondrial protein homolog	CMC1
16.2392	15.2468	15.7767	16.3703	14.5607	19.9351	15.6161	15.9284	16.9376	16.182	14.8381	16.584	16.2244	15.1917	14.5274	15.0926	14.4862	15.6383	14.9758	NA	1.08667	0.160817	1.02225		1.84911	Q9NRP2	6	COX assembly mitochondrial protein 2 homolog	CMC2
12.5358	14.5511	13.0738	14.4338	13.8771	16.8016	13.0178	13.9253	13.0194	13.4759	14.3303	12.4475	12.4387	11.9344	11.1606	12.4666	12.4611	12.5446	10.6077	TISSUE SPECIFICITY: Expressed in many tissues with a relatively high level in skeletal muscle.	2.71378	0.0127468	1.84599	+	3.66147	P56277	5	Cx9C motif-containing protein 4	CMC4
14.6302	13.0026	13.9182	15.9545	12.8854	13.9519	11.5177	14.0918	12.2683	13.4215	13.7425	12.0849	11.5937	12.2234	11.3556	11.4719	11.6455	10.5742	10.2378	TISSUE SPECIFICITY: Isoform 1 is expressed in peripheral blood mononuclear cells and kidney. Lower expression in brain and liver. Expression is down-regulated in activated cells. Isoform 2 is expressed in lymphocyte precursors, however, expression shuts down during maturation and differentiation in thymus and fetal liver. {ECO:0000269|PubMed:12939343}.	3.31357	0.00560591	2.1555	+	4.29925	Q8IY22	3	C-Maf-inducing protein	CMIP
18.6823	18.7894	18.2482	18.5505	18.3712	20.3463	18.6957	19.9274	19.0377	19.7659	19.4144	17.6501	17.696	18.5053	18.8204	18.5099	19.7094	18.404	17.985	TISSUE SPECIFICITY: Ubiquitously expressed. {ECO:0000269|PubMed:11681623}.	0.64682	0.341567	0.438013		1.25766	P30085	45	UMP-CMP kinase	CMPK1
15.0391	11.9559	14.5323	16.2933	14.5856	12.6683	13.1578	13.1789	10.8214	12.9837	12.7977	13.2272	12.3074	12.7312	13.7282	13.1322	13.7151	15.0807	12.8637	NA	0.0411798	0.936726	0.0712631		0.115328	C9J384;Q9BQ75;Q9BQ75-2	7	Protein CMSS1 (Fragment);Protein CMSS1;Isoform 2 of Protein CMSS1	CMSS1
14.8809	15.0599	14.1663	15.6664	14.3217	11.4959	15.1886	14.8748	16.2911	15.3496	15.6621	12.4648	14.0052	14.5168	14.6128	14.1779	15.0735	11.1987	14.7551	TISSUE SPECIFICITY: Highly expressed in testis and prostate. {ECO:0000269|PubMed:12782130}.	0.411337	0.508643	0.569943		0.886249	Q8IZR5-2;Q8IZR5-3	4	Isoform 2 of CKLF-like MARVEL transmembrane domain-containing protein 4;Isoform 3 of CKLF-like MARVEL transmembrane domain-containing protein 4	CMTM4
14.2986	14.077	15.6206	13.7458	13.5297	13.6233	13.0415	12.5825	13.6687	16.1873	12.6957	11.6344	11.4358	11.0947	11.6395	10.7233	10.6443	10.925	10.8471	TISSUE SPECIFICITY: Expressed in the leukocytes, placenta and testis. {ECO:0000269|PubMed:12782130}.	4.3643	0.00105556	2.68118	+	5.45004	Q9NX76	3	CKLF-like MARVEL transmembrane domain-containing protein 6	CMTM6
15.8642	14.8982	14.812	16.8699	13.9903	14.646	14.8152	14.8672	17.069	15.2718	14.7088	14.4519	10.8478	14.4886	14.7091	15.2126	16.1064	13.8262	14.578	NA	0.879428	0.231642	0.936042		1.58233	Q8N1G2	9	Cap-specific mRNA (nucleoside-2'-O-)-methyltransferase 1	CMTR1
11.5145	12.6931	12.8187	13.7885	11.5612	12.1234	13.1267	9.29443	12.4976	12.5576	11.8558	13.2297	12.2505	13.368	12.9374	12.8452	14.4185	14.5921	13.2242	TISSUE SPECIFICITY: Present in all tissues examined.	1.40246	0.096222	-1.12146	+	-2.22912	P62633;P62633-2;P62633-3;P62633-4;P62633-5;P62633-6;P62633-7;P62633-8	4	Cellular nucleic acid-binding protein;Isoform 2 of Cellular nucleic acid-binding protein;Isoform 3 of Cellular nucleic acid-binding protein;Isoform 4 of Cellular nucleic acid-binding protein;Isoform 5 of Cellular nucleic acid-binding protein;Isoform 6 of Cellular nucleic acid-binding protein;Isoform 7 of Cellular nucleic acid-binding protein;Isoform 8 of Cellular nucleic acid-binding protein	CNBP
14.1374	12.8975	12.4426	13.2027	11.9799	13.816	12.5925	13.3557	12.0481	12.6372	12.7827	10.7689	12.5819	14.2156	13.5767	13.3786	14.4057	11.8263	12.4989	NA	0.560322	0.396079	-0.490192		-1.12744	Q969H4;Q969H4-2	3	Connector enhancer of kinase suppressor of ras 1;Isoform 2 of Connector enhancer of kinase suppressor of ras 1	CNKSR1
16.9707	15.7939	18.7504	21.2891	15.9902	19.5889	17.5656	16.5549	17.0843	17.5854	17.7459	16.8275	15.5632	15.2413	18.8896	19.575	16.0107	16.7941	20.7029	TISSUE SPECIFICITY: Smooth muscle, and tissues containing significant amounts of smooth muscle.	0.0443452	0.932562	0.106037		0.123792	P51911	59	Calponin-1	CNN1
19.2514	18.547	18.5736	19.9932	18.4732	19.8859	18.0932	18.2317	18.2295	18.7303	17.6145	18.5351	18.7577	18.62	18.5535	17.8732	18.9882	19.8605	18.1761	NA;TISSUE SPECIFICITY: Heart and smooth muscle.	0.0106466	0.981472	-0.00998874		-0.0308055	B4DDF4;B4DUT8;Q99439	31	Calponin;Calponin;Calponin-2	CNN2
14.033	12.2323	13.5073	13.304	11.2131	12.1851	11.7445	13.1556	13.1174	13.0361	10.368	9.68194	12.6158	9.79091	9.65811	10.8349	10.8342	10.5325	9.40577	TISSUE SPECIFICITY: Widely expressed. Expressed at higher level in brain, kidney and placenta, while it is weakly expressed in skeletal muscle. In the kidney, it is expressed in the distal convoluted tubule and the thick ascending limb of Henle loop. {ECO:0000269|PubMed:21397062}.	2.07604	0.0334904	1.77361	+	2.98064	Q9H8M5;Q9H8M5-2	5	Metal transporter CNNM2;Isoform 2 of Metal transporter CNNM2	CNNM2
14.4444	15.3136	17.0171	15.2881	14.4517	14.3148	14.7021	14.0544	13.1004	15.2258	14.5547	13.4264	12.1309	13.3442	13.9001	14.5423	12.7356	6.48172	11.7665	TISSUE SPECIFICITY: Widely expressed. Expressed at higher level in heart and spleen. {ECO:0000269|PubMed:12657465}.	2.07707	0.0334556	2.52906	+	2.98176	Q8NE01	12	Metal transporter CNNM3	CNNM3
14.6969	15.1391	14.5236	12.3523	14.557	15.2636	14.6709	13.4253	15.199	14.2607	14.4354	13.1155	11.8189	13.0522	12.0509	13.1756	12.709	11.8558	8.87087	TISSUE SPECIFICITY: Widely expressed. Highly expressed in heart. {ECO:0000269|PubMed:12657465}.	3.42305	0.00491553	2.36996	+	4.41656	Q6P4Q7	16	Metal transporter CNNM4	CNNM4
16.1921	15.3851	17.0202	16.7856	16.0662	16.3684	14.8002	15.6661	15.2592	16.7987	15.3618	14.756	14.9454	15.0245	14.6016	14.9273	14.7728	15.2395	14.6958	TISSUE SPECIFICITY: Strongly expressed in brain, heart, thymus, spleen, kidney, liver, placenta and lung. Weakly expressed in skeletal muscle and colon. {ECO:0000269|PubMed:10637334}.	2.30844	0.023193	0.984941	+	3.23037	A5YKK6;A5YKK6-2	62	CCR4-NOT transcription complex subunit 1;Isoform 2 of CCR4-NOT transcription complex subunit 1	CNOT1
14.2716	13.8062	14.1251	15.1308	13.9986	13.8788	13.4824	13.211	14.4248	14.5058	13.3086	12.6594	14.0263	13.4642	12.602	13.3208	13.6569	13.0507	12.9946	NA	1.27385	0.117701	0.598024		2.07745	Q9H9A5;Q9H9A5-2	13	CCR4-NOT transcription complex subunit 10;Isoform 2 of CCR4-NOT transcription complex subunit 10	CNOT10
13.6245	14.1949	14.4528	13.9525	13.9662	15.6431	13.8562	13.1522	12.7673	16.8743	13.2759	13.3029	11.9961	13.1276	12.7705	12.0928	14.2132	13.1809	12.7449	NA	1.62817	0.0675837	1.21343	+	2.48752	Q9UKZ1	6	CCR4-NOT transcription complex subunit 11	CNOT11
15.306	13.6384	16.5796	16.1694	15.109	14.8333	12.8176	14.9057	13.3141	16.8407	15.1078	12.2061	11.3145	13.2287	13.8076	14.2788	14.296	12.1101	11.8901	NA;TISSUE SPECIFICITY: Ubiquitous. Highly expressed in brain, heart, thymus, spleen, kidney, liver, small intestine, placenta, lung and peripheral blood leukocytes. {ECO:0000269|PubMed:10637334}.	1.77079	0.0540977	1.74626	+	2.64684	F8VUB4;F8VV52;Q9NZN8;Q9NZN8-2	9	CCR4-NOT transcription complex subunit 2;CCR4-NOT transcription complex subunit 2 (Fragment);CCR4-NOT transcription complex subunit 2;Isoform 2 of CCR4-NOT transcription complex subunit 2	CNOT2
16.0618	15.4453	16.0197	16.5765	15.1821	16.5999	14.9895	15.0078	15.6285	16.2207	15.1465	14.3096	13.9445	15.0223	14.4013	14.4317	15.4589	14.9512	14.6217	TISSUE SPECIFICITY: Ubiquitous. Highly expressed in brain, heart, thymus, spleen, kidney, liver, small intestine, lung and peripheral blood leukocytes. {ECO:0000269|PubMed:10637334}.	2.07296	0.0335576	0.90877	+	2.97731	O75175	15	CCR4-NOT transcription complex subunit 3	CNOT3
12.9389	11.6116	14.6218	15.6699	13.9427	11.7451	13.5148	13.3188	14.2075	14.5707	13.4024	12.5134	10.9807	12.8486	13.366	13.8299	13.0254	10.6621	10.8559	NA	1.33872	0.106089	1.2807	+	2.15442	O95628;O95628-10;O95628-2;O95628-3;O95628-4;O95628-5;O95628-6;O95628-7;O95628-8;O95628-9	2	CCR4-NOT transcription complex subunit 4;Isoform 10 of CCR4-NOT transcription complex subunit 4;Isoform 2 of CCR4-NOT transcription complex subunit 4;Isoform 3 of CCR4-NOT transcription complex subunit 4;Isoform 4 of CCR4-NOT transcription complex subunit 4;Isoform 5 of CCR4-NOT transcription complex subunit 4;Isoform 6 of CCR4-NOT transcription complex subunit 4;Isoform 7 of CCR4-NOT transcripti…	CNOT4
13.8313	15.2472	15.3889	15.2181	15.5704	13.3453	14.496	14.9192	12.9706	16.6333	15.659	12.8917	14.5621	13.8058	13.8184	14.2532	13.1623	11.2908	12.5559	NA;TISSUE SPECIFICITY: Highly expressed in placenta, skeletal muscle, pancreas, testis and leukocytes. Weakly expressed in heart, spleen and thymus. {ECO:0000269|PubMed:17452450}.	1.55587	0.0751862	1.33112	+	2.40568	H0Y9Z5;Q96LI5	4	CCR4-NOT transcription complex subunit 6-like	CNOT6L
14.6808	15.97	15.3892	15.989	15.3356	14.0708	15.1332	14.0338	12.8887	15.5699	13.6608	14.5337	11.2006	11.6489	10.9623	12.2166	13.5119	11.7193	9.71477	NA	5.23857	0.00020339	3.20351	+	6.46919	Q9UIV1	4	CCR4-NOT transcription complex subunit 7	CNOT7
15.3409	14.8768	16.608	14.9145	15.0774	14.7317	14.3855	15.037	14.4822	16.439	14.5137	14.9238	16.5076	15.0561	15.4837	14.0275	15.3827	14.3465	14.0875	TISSUE SPECIFICITY: Detected in spleen, thymus, prostate, testis, ovary and intestine. {ECO:0000269|PubMed:9447985}.	0.131297	0.812157	0.126386		0.338542	Q92600;Q92600-2	10	CCR4-NOT transcription complex subunit 9;Isoform 2 of CCR4-NOT transcription complex subunit 9	CNOT9
14.9883	15.1682	17.17	16.3995	15.0552	16.6242	15.5781	14.9595	15.8685	16.0281	15.4208	15.9177	15.1344	15.294	14.6085	14.8269	14.9132	15.5426	15.5911	NA	1.37044	0.100806	0.634751	+	2.19169	P09543;P09543-2	33	2',3'-cyclic-nucleotide 3'-phosphodiesterase;Isoform CNPI of 2',3'-cyclic-nucleotide 3'-phosphodiesterase	CNP
14.3697	17.1053	13.1372	13.1417	13.1111	20.0053	16.1431	14.5313	13.1731	12.8421	15.689	17.1553	17.0213	16.8039	16.6023	16.9873	17.3944	16.8097	16.4968	TISSUE SPECIFICITY: Expressed in different tissues. Highest levels are detected in adult placenta, liver and pancreas. {ECO:0000269|PubMed:12826659}.	1.32701	0.108305	-1.83998	+	-2.14059	Q9Y2B0	2	Protein canopy homolog 2	CNPY2
[truncated: 4,970 more rows]

## Sheet: Analysis_2
EOCRC12_PG.Quantity	EOCRC1_PG.Quantity	EOCRC3_PG.Quantity	EOCRC8_PG.Quantity	EOCRC4_PG.Quantity	EOCRC11_PG.Quantity	EOCRC7_PG.Quantity	EOCRC9_PG.Quantity	EOCRC6_PG.Quantity	EOCRC2_PG.Quantity	EOCRC10_PG.Quantity	EOCRC15_PG.Quantity	N_EOCRC1_PG.Quantity	N_EOCRC3_PG.Quantity	N_EOCRC8_PG.Quantity	N_EOCRC4_PG.Quantity	N_EOCRC7_PG.Quantity	N_EOCRC9_PG.Quantity	N_EOCRC6_PG.Quantity	N_EOCRC2_PG.Quantity	N_EOCRC10_PG.Quantity	N_EOCRC5_PG.Quantity	SOCRC6_PG.Quantity	SOCRC4_PG.Quantity	SOCRC3_PG.Quantity	SOCRC1_PG.Quantity	SOCRC2_PG.Quantity	SOCRC5_PG.Quantity	SOCRC7_PG.Quantity	N_SOCRC3_PG.Quantity	N_SOCRC1_PG.Quantity	N_SOCRC8_PG.Quantity	N_SOCRC9_PG.Quantity	N_SOCRC7_PG.Quantity	N_SOCRC2_PG.Quantity	N: -Log Student's T-test p-value EOCRC_N_EOCRC	N: Student's T-test q-value EOCRC_N_EOCRC	N: Student's T-test Difference EOCRC_N_EOCRC	Significantly deregulated EOCRC_N_EOCRC	N: Student's T-test Test statistic EOCRC_N_EOCRC	N: -Log Student's T-test p-value SOCRC_N_SOCRC	N: Student's T-test q-value SOCRC_N_SOCRC	N: Student's T-test Difference SOCRC_N_SOCRC	Significantly deregulated SOCRC_N_SOCRC	N: Student's T-test Test statistic SOCRC_N_SOCRC	N: -Log Student's T-test p-value N_EOCRC_N_SOCRC	N: Student's T-test q-value N_EOCRC_N_SOCRC	N: Student's T-test Difference N_EOCRC_N_SOCRC	Significantly deregulated N_EOCRC_N_SOCRC	N: Student's T-test Test statistic N_EOCRC_N_SOCRC
[truncated: 6,433 more rows]
[truncated: 4 more columns]

[truncated: 8 more sheets: Original Matrix, GOBP Analysis, Tissue_Cells Specificity, GOCC_up, GOCC_down, Placenta Signature, Placenta Signature_adj, Selected Pathways]
