# Supplementary material for: Early-Onset Colorectal Cancers Exhibit Distinctive Placental-Like Features
Source: Research Square preprint supplement (doi:10.21203/rs.3.rs-7193450/v1), 2025-08-06
Supplement: Supplementary file 2 [file 388f56aee3be69ef00a405bd.xlsx]

## Sheet: Supp Table 3
Supplementary Table 3: Patient-derived organoids retain placental features.

## Sheet: PCA matrix
Genes	EOCRC12	EOCRC1	EOCRC3	EOCRC8	EOCRC4	EOCRC11	EOCRC13	EOCRC14	EOCRC15	EOCRC7	EOCRC9	EOCRC6	EOCRC2	EOCRC10	EOCRC5	EOCRC19	EOCRC18	EOCRC16	EOCRC17	EOCRC20	EOCRC21	EOCRC22	EOCRC23	SOCRC6	SOCRC4	SOCRC3	SOCRC1	SOCRC7	SOCRC2	SOCRC5	SOCRC12	SOCRC9	SOCRC8	SOCRC13	SOCRC11	SOCRC10	SOCRC14	SOCRC15	SOCRC16	SOCRC17	PDO1-EOCRC18	PDO2-SOCRC26	PDO3-SOCRC27	PDO4-EOCRC8
ABCB7	16.6139	17.6407	16.3308	18.5972	16.7153	16.9384	17.0899	15.8521	17.2435	17.021	16.9422	16.7454	16.3609	17.2846	16.9544	15.9899	14.7657	15.91	16.2853	15.5901	15.9148	14.6865	15.6046	16.0073	16.0281	15.916	15.8043	15.9851	13.541	16.715	16.5753	15.6683	15.1145	16.5398	16.3476	16.0238	15.8918	15.7061	15.8476	16.1676	16.4976	15.6429	16.8283	15.8994
ABHD6	16.5123	15.7136	15.2292	15.0926	16.1836	14.5464	15.2333	14.2886	15.6512	14.8391	15.485	16.2733	16.854	14.8056	15.0376	14.1735	14.3726	14.3104	13.6	13.1755	14.3191	12.7088	14.2206	15.874	14.8367	11.4017	14.8381	15.4089	12.6973	14.6136	14.6372	14.276	14.7978	16.4667	14.378	14.2324	14.6356	14.4932	14.54	14.0462	15.5609	14.9991	14.1196	15.2574
ABLIM1	15.9382	15.9789	16.6188	17.0905	16.7751	15.9527	16.1765	15.2434	15.7414	16.1737	16.4749	16.842	17.4516	16.3063	15.1601	15.6478	15.8456	15.794	16.4632	15.045	15.4709	15.7422	16.0186	15.9985	16.4102	16.3056	15.2764	15.8309	16.2705	16.0067	15.8569	15.6753	15.6304	15.9067	15.6879	15.9301	16.1329	15.2703	15.8002	16.8882	15.1457	15.5943	14.5224	16.7722
ACADSB	17.1486	17.7117	18.0483	17.2229	18.3911	17.411	18.5799	17.492	17.9114	18.4818	18.323	18.7296	18.2575	18.0727	17.9129	16.6096	16.7521	17.4796	17.6415	17.6298	16.6483	19.7074	17.5619	18.9154	16.5892	17.2688	17.7772	17.9403	16.9523	15.3478	17.8869	18.1682	16.6882	18.0132	17.2674	17.7885	16.6805	17.628	17.3419	17.8052	17.5895	18.4008	17.7001	19.1831
ACAP2	16.3061	16.1692	17.0449	16.6994	15.6374	15.3617	16.0771	15.9732	15.8969	16.3791	16.0709	17.6087	17.0981	15.8959	15.3928	14.9286	14.9112	15.3451	14.6089	15.4886	15.0938	15.4221	14.2187	16.3081	15.4003	15.7185	15.8066	15.985	16.1174	16.0741	15.0062	16.2414	15.5592	16.1406	15.5673	16.1023	14.9322	14.264	15.4799	15.0261	14.034	14.6151	15.0335	17.5148
ACBD3	17.9653	17.9469	18.7823	18.6865	17.9298	17.6168	17.648	16.7699	18.1018	17.9438	18.173	18.0796	18.7811	18.2125	17.6843	17.8337	18.1815	18.7738	17.0338	17.1095	17.2447	16.5552	17.5718	17.7208	17.3815	17.0882	16.7749	16.9258	18.0967	17.5174	17.1656	17.3906	16.9201	16.5716	16.5394	16.5244	18.2561	17.0897	16.9432	17.2533	17.944	16.9078	16.7011	17.7318
ACP2	18.5386	17.1767	19.2159	19.1723	16.773	16.1196	17.4255	16.504	16.0517	17.6548	17.5517	17.5871	18.0088	17.6951	16.5492	16.2756	15.6426	18.3541	16.2471	17.7297	15.8392	18.0484	17.3581	17.9413	16.0893	16.5269	16.9048	16.4594	14.9428	16.9055	16.661	16.842	16.245	17.024	17.2881	17.52	17.5679	16.8967	17.2622	16.2315	17.3948	17.6242	15.9439	15.4741
ACTR6	13.2682	14.1536	15.5317	16.0458	13.779	13.83	12.2718	13.3888	13.3137	13.9883	13.6637	13.5496	15.3783	13.2077	13.9213	14.3321	14.2546	16.2901	13.7719	13.9829	13.5256	15.5649	15.0338	12.4471	13.781	11.7734	14.8548	13.799	13.5076	14.6956	13.4286	13.2822	14.0358	13.6779	13.4842	12.9644	14.0656	14.4251	13.8762	13.8225	14.552	14.1346	14.1488	12.5695
ADA	16.1823	14.6373	15.9639	18.2747	15.0765	15.446	16.2138	15.2445	16.2276	14.7233	14.9967	15.855	16.1119	14.8757	14.5359	16.7735	15.6557	16.7327	15.4469	15.6026	14.0206	16.2824	14.6779	16.1428	14.0605	14.8689	14.2705	15.4561	14.7278	15.9604	14.5606	14.6434	14.4618	15.6849	14.9938	15.9469	15.2122	14.2758	15.2165	14.2068	12.8966	12.6678	14.7788	14.0233
AGK	16.5545	16.3954	17.5437	18.7831	16.3897	16.0587	16.8905	16.6912	17.0438	16.4165	16.2405	16.968	17.3159	16.2703	16.4892	16.9769	16.2211	17.4136	16.9655	15.7439	15.9151	16.3039	16.3106	16.4713	16.445	14.7477	16.8409	16.3019	14.5673	15.8954	16.6901	16.2146	15.9197	16.3133	16.2183	16.3491	16.0199	16.5462	16.0599	16.4395	16.8277	15.8558	17.3443	16.1788
AHDC1	14.3164	14.6262	15.2179	14.8257	13.688	13.92	13.0562	13.1914	11.2255	14.5625	15.1284	13.16	14.343	14.4782	13.3744	13.8013	13.5854	14.5162	15.1377	13.852	13.5628	14.8228	14.4699	12.3098	13.514	12.1754	11.3932	12.7097	12.6552	12.6015	14.1648	14.5551	13.329	12.5038	12.7015	13.8519	13.6333	13.479	14.4244	13.7026	14.4271	15.1132	13.9101	12.7274
AHNAK2	15.8259	17.3182	16.6235	18.442	17.6533	15.9577	16.2691	16.1476	16.6133	16.5123	13.7742	16.9526	16.6922	16.6742	16.0037	15.8797	15.5783	16.5516	18.0654	15.8704	14.6275	18.3045	16.8097	16.7238	18.6989	16.6241	16.3065	17.8762	15.2281	16.9547	17.7633	16.8034	16.4955	18.539	17.4039	18.986	14.0718	15.539	14.8229	17.378	15.5686	15.9996	14.171	15.5486
AKAP9	15.8512	16.1171	16.5334	17.0326	15.0388	15.922	16.0122	15.2585	15.6567	16.4171	15.4409	16.8636	16.7926	15.9725	15.388	15.2741	15.0486	16.444	15.2017	15.3154	14.997	15.405	15.1331	15.9632	15.4088	15.3475	16.1775	15.7111	16.0502	16.3623	15.6685	16.292	15.3894	15.5096	15.4366	15.3444	14.912	15.0656	15.36	15.2603	15.036	14.8778	14.9877	16.0356
AKTIP	13.5799	14.1666	13.6113	14.2099	14.7328	10.9426	12.1115	12.5034	12.0174	14.096	15.0225	14.5076	15.7589	15.1925	14.0727	11.6542	14.4534	12.4074	14.3834	13.1631	13.3912	11.9107	12.5866	13.5752	14.1361	12.4638	12.017	12.9564	13.6636	14.0982	13.0311	13.4407	13.4214	14.3116	13.4623	14.3029	14.1422	11.3897	13.122	13.2132	15.1146	13.8662	14.3144	13.818
ALDH1L2	16.6967	17.4027	17.3459	13.8936	16.3329	15.1895	17.1787	15.1925	17.2117	17.2654	16.17	17.4506	16.9902	16.6712	14.9223	15.8921	13.4799	17.7298	16.2435	16.3304	15.7668	17.3768	15.2775	15.4201	15.579	15.8932	15.5901	17.118	14.6253	16.5709	17.1455	16.5016	16.9508	16.8013	15.8671	16.791	15.2182	15.0717	16.2858	13.9314	16.6684	11.8653	14.6746	16.3796
ALG12	14.0823	14.9491	13.6014	14.4999	16.0434	13.854	16.3184	15.0109	17.1649	16.1153	15.2234	16.5203	14.4066	15.617	15.0826	12.1531	12.5972	13.1125	12.5673	14.6278	14.6385	14.257	14.1866	14.0254	13.9228	13.9215	14.4344	15.0246	11.8368	12.4006	15.3692	16.4679	15.9104	15.5539	15.5443	15.8734	15.2353	14.7702	15.5597	14.3833	10.8552	15.7487	15.7189	11.7025
ALG2	14.4084	15.504	18.5766	15.0115	15.8566	14.5021	15.3167	15.0208	15.8004	15.4416	14.8104	15.6043	18.8637	14.1872	15.1736	15.3567	15.5469	16.1039	14.408	15.6713	14.9525	16.2843	14.8117	14.2866	14.7042	12.8286	14.9418	15.8352	13.4719	14.6163	14.8557	15.528	16.0411	15.7055	15.2438	15.3876	16.0534	14.7151	15.2831	15.3125	15.7438	16.7566	15.5173	13.874
AMBP	15.6638	16.7998	16.3417	18.0186	15.0109	15.6414	15.5521	15.3086	15.0351	16.2253	13.2131	17.0912	13.2999	16.0059	15.1119	16.1221	17.6142	17.9339	18.1159	17.6325	17.3633	19.089	17.4727	19.3471	16.6364	16.8464	17.1958	18.1289	16.885	18.8424	17.6035	17.8248	17.8509	18.0176	18.1244	19.0552	17.9375	16.8935	18.2865	15.7943	11.3833	11.5899	11.9967	13.6368
ANAPC5	14.5066	12.7497	17.5165	15.9697	15.5414	14.9847	12.059	14.0488	13.3413	10.7387	15.0959	13.6615	14.6838	14.5515	9.71261	12.8343	14.3077	13.2073	13.2037	12.7232	13.9531	11.7958	11.8324	12.8442	13.042	0.644471	12.1728	12.6857	12.2383	18.2955	12.9877	11.0981	15.3572	13.0868	13.2333	12.958	13.4062	12.8045	12.7764	16.4036	14.0534	11.2325	13.1981	12.4648
ANKRD52	12.7462	13.1874	14.1384	14.5948	13.9404	12.7834	13.9443	14.6572	14.6546	12.5367	12.0983	13.365	12.9319	13.8716	12.9208	12.7479	15.427	16.7721	12.4106	15.6893	12.4808	17.4471	15.889	15.6953	13.4106	12.3508	13.2301	13.4564	12.4101	14.9237	12.4892	12.5553	15.4868	13.8545	13.3568	16.3736	15.7687	14.0799	15.8284	12.2983	12.5044	14.2862	14.3193	12.4571
ANP32A	20.6089	20.3093	21.2326	21.5555	21.0806	19.0715	19.1144	19.6116	18.7653	19.7091	20.5065	19.9864	20.4778	19.5838	19.0514	20.5775	19.9903	19.8812	20.4131	19.8491	18.8974	19.6761	19.6242	19.1775	19.6326	19.6112	19.1044	19.8656	19.9825	19.28	18.3832	18.6721	19.0163	18.3192	18.7148	18.4377	20.2265	19.958	19.8153	18.8959	20.6545	19.2583	18.5814	20.4025
ANXA1	20.8532	20.4886	21.5025	21.0221	19.8082	20.9145	21.0618	20.322	21.027	20.3844	19.9094	20.1889	21.2957	20.3278	17.9637	21.2799	20.0999	20.3735	21.2907	20.4042	20.1036	22.051	19.8821	21.3637	18.6927	19.4944	19.2433	20.6632	17.97	20.4545	20.8087	19.9679	20.6888	20.62	21.2418	21.6088	19.3078	19.3202	19.946	19.4674	21.0871	18.9528	19.3371	18.4326
ANXA11	19.9235	18.6636	20.2838	20.3045	18.4788	19.2191	20.2838	18.9698	18.9564	19.8251	19.6963	19.1405	20.615	19.3308	19.3538	19.9504	19.2946	18.1748	20.126	19.2517	19.4246	19.6196	19.4365	18.7214	18.6469	18.5626	17.937	19.8393	16.2156	18.6902	19.7134	19.0804	19.2362	19.5241	19.0803	19.5605	19.5603	19.4381	19.2193	19.9105	20.741	19.0137	18.45	18.9368
AP3S1	18.0359	17.5443	18.0754	18.8151	17.57	17.2076	18.0673	17.3728	17.1691	17.5628	17.522	17.4277	17.8453	17.4241	17.3859	16.9893	17.8694	17.8176	17.5919	16.2293	17.197	17.357	17.8042	16.7375	17.4399	17.5343	16.8694	17.1335	17.8943	16.7549	17.2236	16.6663	16.8197	16.7474	16.1782	17.0058	17.5846	16.792	16.9319	17.024	17.4663	16.6147	17.136	18.1736
APEH	18.0225	18.7854	18.9513	18.6303	19.0557	19.0292	17.9126	18.1887	17.5364	18.5453	18.6233	19.2799	19.3646	18.4551	18.4677	18.2766	18.4031	19.1867	18.3937	18.522	18.0206	17.5425	17.9933	18.0103	18.7068	18.4211	18.1191	18.0725	15.4436	17.6488	17.5769	18.1822	16.9129	18.34	17.5885	18.3102	18.1346	17.8881	18.494	17.9655	18.7581	18.2874	17.8992	16.1673
APOBR	16.8808	15.4145	16.5139	17.1443	15.9294	15.7152	15.418	15.0827	14.4524	16.6148	16.3951	17.0527	17.8035	17.0825	15.1327	16.0056	14.8251	16.3676	14.988	15.6577	15.5063	15.4937	15.5024	15.7517	14.998	14.9832	15.6049	15.9234	15.6166	15.5933	15.2412	15.6812	14.0621	14.5884	15.1632	14.9873	16.1068	15.1674	16.0455	15.727	12.6108	13.7122	12.6316	12.2351
APOE	17.2327	16.8193	18.5605	18.7919	17.1431	18.0886	17.4581	18.6221	17.5114	17.1059	17.4932	18.1366	18.62	17.6853	17.6801	16.5656	16.71	18.2539	17.7636	18.4021	16.9012	18.1516	17.4776	20.1597	18.0133	18.1879	18.6809	18.9246	19.4868	20.9038	17.5624	18.686	17.3212	18.0088	18.3248	18.6378	17.395	19.1331	17.3893	16.2244	14.5435	14.1025	16.7329	13.4985
APPL2	16.8225	18.4221	17.5872	18.3424	16.6443	17.3862	17.0587	15.4815	16.2933	17.4562	16.8596	17.7217	17.9034	17.8195	16.2277	16.2678	16.0463	16.9783	16.2363	16.7541	16.3847	16.425	16.2517	17.0587	16.5436	16.5583	16.9086	18.4953	16.973	17.0762	16.329	18.2145	16.7075	17.1163	16.5679	16.4683	16.7895	16.4862	17.2885	16.827	15.6143	15.6959	15.5124	17.0527
ARAP3	13.8969	12.5148	15.1347	15.1154	14.2617	12.9825	12.7996	13.3599	12.4254	11.4236	14.3767	13.6975	15.3148	13.7634	13.4581	11.5151	13.259	12.9195	13.0977	12.8292	12.359	13.3145	13.2552	14.3562	13.5409	11.4369	12.7321	13.1938	11.9232	11.9466	13.0746	12.1991	13.4362	12.5929	12.7591	12.5484	10.2398	13.7156	12.5538	10.7606	13.6189	11.5982	12.2133	12.345
ARFGAP3	16.3422	17.2132	17.762	16.2545	15.0784	16.1485	16.8622	15.8478	16.3556	16.9847	16.6994	17.0775	17.8088	16.5186	15.5426	16.319	16.4277	16.0654	15.7503	14.8521	15.1173	15.4643	15.4721	15.4916	15.2491	15.6312	14.9483	16.1994	15.92	14.2104	15.7213	15.8604	15.8155	15.4248	15.4886	15.9289	16.4388	15.8254	15.7254	15.6682	16.6287	14.8914	15.5834	17.2825
ARFIP1	16.7433	16.5354	16.6347	15.8621	17.1353	16.75	15.9379	15.8128	13.9299	16.6531	16.5211	15.4066	18.3898	17.0365	14.5839	15.1177	16.7269	16.7924	15.4798	13.784	16.1537	15.5618	15.9394	15.1987	16.1759	15.7885	15.5882	16.4348	16.7995	15.8668	15.7885	15.1	15.2092	15.7803	14.8719	15.3018	16.1602	15.6424	14.2902	16.0598	15.289	16.655	16.6796	17.9125
ARHGAP25	16.3028	12.6324	16.1698	14.15	15.1126	14.8052	15.3401	14.9318	15.1807	15.4441	14.721	15.073	16.9628	15.6211	12.1771	16.2555	13.8509	14.9498	12.6574	13.6564	14.0367	12.0739	14.5368	15.455	13.3966	14.952	14.1858	14.65	14.084	14.6506	14.8225	15.3211	14.4476	14.5928	15.4534	14.781	14.1641	12.6744	13.5524	14.0314	12.848	12.252	11.4733	12.9247
ARHGEF10L	16.5227	16.4228	13.8395	18.38	15.6854	15.8506	16.3812	15.9846	16.0534	15.9312	16.2777	17.3532	16.7486	16.0993	15.5438	15.8269	15.8582	16.9991	15.265	16.3938	15.199	15.0569	16.274	16.0142	16.8751	16.5291	16.1149	15.5835	15.5439	16.732	15.3287	15.9766	16.3103	15.6422	15.798	15.6268	16.5203	15.6479	15.598	15.1197	14.908	15.5205	14.196	17.5105
ARHGEF40	14.2994	13.6969	14.7763	15.8379	14.8075	15.6167	13.8465	13.1484	13.6926	13.8537	14.1364	13.978	15.6447	14.8081	13.2571	14.3384	12.1809	14.1644	12.4933	12.7772	12.224	14.6989	12.1318	12.7411	12.5041	11.3754	13.3089	12.0128	13.1555	13.6117	15.525	13.7963	12.9885	16.8425	17.4712	13.3502	12.6216	13.4165	13.1365	12.6014	13.2532	12.048	12.8281	14.0587
ARHGEF5	14.4777	13.5661	14.3355	16.3187	14.4689	14.6109	13.4461	13.6681	13.8661	13.9771	13.2904	15.5812	15.1186	14.5929	13.9009	14.375	14.4659	15.116	14.3018	13.7179	13.6562	12.3295	14.3299	12.4288	14.0814	14.0409	13.7286	11.9375	13.8473	14.2101	14.2964	13.7018	14.9472	15.2747	14.4893	13.2011	14.0966	13.7083	13.5359	14.7634	14.365	14.3961	14.5958	16.1717
ARHGEF6	15.0348	14.7052	13.7783	15.5671	14.3643	13.5048	14.7586	14.2366	15.3893	14.8316	13.6639	14.7539	13.7518	14.806	13.1205	14.4586	14.225	14.5556	14.2328	14.0465	13.4234	15.0864	14.3462	15.2605	13.1868	14.3821	13.6787	14.7516	13.7703	13.7085	14.7931	14.2982	14.4829	14.4423	14.9978	13.8494	14.2259	13.0779	14.2861	13.5888	12.1425	11.4318	11.5822	12.8856
ARID1A	15.5034	14.845	15.4498	16.8815	15.1685	14.9864	15.0782	15.0021	15.1562	14.6698	14.6403	14.955	16.1745	15.012	14.8107	14.9673	14.6365	16.6587	14.6662	14.1569	14.7111	15.4044	15.68	14.6996	14.8705	14.6932	14.7343	14.6499	15.2864	13.9577	15.0092	14.6533	15.3892	15.1553	14.956	14.9704	14.5175	15.3077	14.2514	14.8007	14.5254	14.9685	13.9122	15.213
ARL15	14.8378	14.2081	16.1276	15.8574	16.465	15.3511	15.1333	14.4999	15.7498	15.6493	15.7732	14.0243	13.7068	14.9371	14.466	12.3209	14.8209	16.5516	15.1039	14.8511	11.2307	16.0256	12.8206	13.3818	15.436	15.3818	11.9889	15.248	14.7198	16.1267	15.2886	14.8492	15.753	15.5349	13.2744	14.2401	13.0356	14.6951	14.8202	13.5385	13.8492	13.5411	11.9988	15.3201
ARPC5L	20.087	18.1832	17.2279	21.4849	18.4016	18.4887	18.8241	18.628	18.9803	18.6065	18.7176	20.0832	19.3522	18.6774	18.0138	16.8334	18.2384	19.9193	18.1086	17.6664	16.7442	18.4572	17.1777	18.2799	18.2755	18.1306	17.6504	19.1229	17.787	19.1844	19.1395	18.8457	18.571	18.7309	19.1127	19.2773	16.8277	17.3293	17.4668	17.7558	17.8526	18.1453	18.4783	18.4565
ASCC1	15.1233	15.1241	16.3876	14.8468	13.9412	14.1417	16.9131	14.9924	14.5675	13.4032	14.6685	14.4175	15.7431	14.9635	13.5633	13.862	14.3086	14.1719	13.9081	13.0519	13.8747	14.1335	13.8207	14.6093	14.2327	13.3711	13.729	14.2876	14.1482	13.9393	13.1414	12.0415	13.1844	14.9843	13.0506	13.2762	13.6083	14.0803	13.8223	13.3293	14.415	14.4686	13.5932	14.8157
ATE1	15.2597	14.6227	15.7317	16.2696	15.0677	14.8238	14.6665	13.6858	14.6043	14.7654	14.728	15.1421	15.9183	15.7546	14.7696	13.2433	14.0619	16.2764	14.5928	13.4738	13.9939	14.6034	13.6031	14.2788	14.0571	13.8105	14.0489	15.2326	14.8246	15.4206	13.8645	14.3999	14.6825	16.2516	14.6974	15.7966	14.1135	13.9297	12.8797	13.4642	15.2798	13.3758	12.4041	15.94
ATG13	15.9866	13.8896	16.531	14.7272	15.1235	12.0123	12.1859	13.1277	13.3953	12.3774	14.5948	14.2943	15.21	15.8212	14.0361	14.7971	13.7149	13.6111	14.3414	13.2002	14.5001	12.6377	11.757	12.7988	12.2659	12.1288	12.9144	13.848	12.777	11.8178	11.961	13.0172	12.4579	12.3274	14.0437	12.4258	14.3683	14.4477	15.1596	14.2004	15.0563	14.7809	14.4176	14.8317
ATG3	15.9153	15.5408	18.2749	18.185	17.2429	17.0228	15.3037	16.0129	14.887	15.4364	15.5879	15.9597	18.0912	15.0822	15.7924	15.454	13.9963	13.0505	15.4818	14.4221	13.3969	14.4187	14.1389	16.5849	15.2241	16.3408	15.3117	15.6763	15.2087	15.86	15.1093	16.2276	15.1561	14.9162	14.3482	15.7851	14.6694	14.2113	14.8271	13.7869	14.4461	13.7959	15.3804	16.8257
ATG9A	13.594	14.6094	15.7787	15.9391	14.9343	12.9444	12.4037	12.2763	13.6418	12.9596	14.1125	13.8026	15.9169	13.0417	12.0732	14.904	15.1969	15.0813	14.5869	12.6903	13.3865	14.3733	13.8129	12.5548	13.7484	12.5647	10.894	14.75	13.5742	13.7841	15.1403	13.4295	15.2128	13.9841	12.6024	12.4997	13.7064	13.3502	13.4974	14.3455	14.2902	14.0703	14.1808	15.1865
ATP13A3	14.39	13.8979	13.8106	15.4373	14.5845	11.9838	14.1485	13.5833	13.2932	13.7617	14.0628	14.8724	13.3933	12.6808	14.0651	13.5154	12.851	15.981	12.3648	12.0268	13.6454	14.3396	13.8339	12.5484	12.5049	13.5609	12.5392	12.4643	12.2998	13.9374	12.6803	12.0719	16.111	14.5378	11.4116	12.1732	13.163	13.6942	13.4118	12.6788	14.212	13.2044	14.6805	13.4703
ATP2B4	17.4301	16.8402	18.8034	19.2804	16.6273	16.2834	16.9609	15.6733	16.8447	16.6303	15.7819	16.5604	18.5597	16.8006	14.8512	16.5471	16.0545	17.058	18.6984	16.9812	15.7909	18.8393	16.5945	17.3608	14.9438	16.169	16.7069	18.0062	15.7687	16.1385	18.66	16.4507	16.9666	19.0863	17.9983	20.114	16.3541	16.0622	16.7175	15.3347	15.2116	14.7347	15.2488	16.2523
ATP6V1F	16.1562	16.8892	18.6304	17.9958	16.2724	16.4121	17.2708	16.6423	17.0459	17.1738	15.8945	16.5496	17.7977	16.3835	16.68	16.9816	16.1983	17.6078	16.5245	15.8289	15.9055	16.9103	16.0079	16.2335	15.4578	16.0958	15.4911	16.8762	16.4311	17.3265	15.8288	15.8289	16.6241	16.7727	16.4048	16.6678	15.2374	16.1043	15.6281	16.0446	16.6177	16.7962	16.0278	16.4819
ATP6V1H	15.4192	15.5984	17.648	17.4214	16.3231	16.1438	15.8559	15.7556	16.2863	15.5733	16.0865	17.4882	17.053	15.9996	15.2718	15.9946	15.152	16.3176	15.2979	16.4291	15.2634	15.5001	14.3261	16.734	14.7803	14.9897	15.3362	16.2151	15.6734	16.6295	16.2957	16.3537	15.5886	16.1384	16.5564	16.7938	15.9402	15.7713	15.9316	15.7971	16.0516	16.0554	15.8143	15.7231
ATP8B1	16.1051	16.3745	16.1137	18.465	16.3268	16.1495	17.0266	15.5148	15.9751	17.706	17.5349	18.5652	16.5491	17.8336	16.2728	15.8842	15.1899	16.1079	14.85	16.2735	15.3984	13.4027	15.1492	11.6549	16.5111	16.9629	18.4731	16.4406	16.3934	16.2408	14.8984	17.0061	15.6957	16.0994	15.7196	15.1477	15.4491	15.7836	16.4123	17.0693	15.5887	14.4796	15.5071	13.3987
ATP9A	16.3169	17.4509	16.9031	16.8845	16.6753	16.285	15.314	15.9906	12.641	16.5427	16.5423	17.3753	17.1987	16.3946	16.8155	15.8767	15.9437	12.9065	16.0801	15.6459	15.8493	12.3995	15.6482	17.8022	15.9007	13.4883	16.0545	13.5641	16.0536	12.8168	17.6028	16.7743	17.1114	17.4067	17.2959	17.727	16.2229	15.4849	15.9619	16.5642	16.0968	15.4697	16.3459	12.3969
ATPAF2	16.0768	14.6761	17.5668	17.8329	15.4994	15.4499	14.452	14.5251	13.7521	15.2254	15.8134	15.1325	16.5023	16.607	14.9053	14.8308	13.7032	12.6947	13.0158	15.5923	11.8912	12.4044	14.5929	15.2209	15.3735	14.9553	15.1383	14.8324	14.3381	13.8229	14.9289	14.8425	14.1898	15.2384	14.9542	15.1618	15.2431	14.6709	13.7332	14.3904	16.1544	16.5353	15.428	13.7181
ATXN3	16.0697	15.7074	17.1588	15.9051	15.0125	15.3037	15.7141	14.8451	16.0956	15.2631	15.371	14.7203	16.8507	15.7599	15.6371	15.4447	15.5721	15.8901	16.2252	15.1292	15.2643	16.2465	15.2676	15.6036	14.1719	14.2727	14.0034	16.3025	15.8791	15.4717	14.3785	11.7782	14.1954	14.2115	15.0575	15.3893	15.2112	15.3418	14.7229	14.8308	16.075	14.9507	14.4	15.5922
AUP1	18.1276	17.3909	18.3839	18.437	18.2452	16.7995	16.6869	17.4204	17.1201	16.974	16.8954	17.0616	17.419	17.6402	17.7902	18.0095	17.9185	18.1645	17.8187	16.4226	17.3376	16.8081	17.1925	16.4876	17.2231	17.032	17.0435	16.9278	15.8544	16.4054	16.3311	16.3567	16.8218	16.9077	16.5877	16.6781	16.7225	16.9311	16.9003	17.4179	16.3369	18.0041	18.2694	17.3111
B3GNT2	15.8219	15.1199	14.9156	14.8181	14.8138	13.1086	14.9945	14.3584	15.4301	14.5961	13.9163	16.0764	13.0542	14.6418	14.8998	12.5107	13.5974	15.1888	14.8186	12.8884	14.9607	15.4989	13.6444	14.7579	13.693	13.6352	14.3714	12.8486	13.5995	15.1606	13.2287	12.8452	13.6046	13.0266	13.3554	12.7123	13.8322	13.0464	14.1398	13.7895	13.9232	13.6344	14.3645	14.2363
BAG2	17.7277	16.1745	18.782	19.001	17.4703	17.0316	16.9186	17.5321	17.3063	16.443	16.3142	16.7383	17.7427	17.1426	12.7724	17.0473	16.3731	18.9698	18.1955	16.4314	15.8647	18.2951	15.2496	16.9956	15.4036	16.9798	17.8235	18.3203	14.3413	15.4072	18.3567	16.2672	17.0739	18.2242	18.1652	19.3225	16.1522	16.4158	15.206	14.7091	16.4782	16.121	17.1449	17.3762
BCHE	13.3039	12.6187	13.6311	13.4335	13.2197	11.9708	16.2251	10.8932	17.2969	16.1279	12.3006	15.8892	14.2385	15.1324	11.7059	12.0098	11.6534	12.4165	11.7215	16.2451	11.0457	16.9156	13.1693	16.3398	11.6089	15.8155	16.0686	17.3377	14.963	16.1753	16.3012	15.0561	14.6818	17.3883	16.4794	18.0242	14.8383	11.5881	14.9272	11.6266	11.6777	11.5291	13.0458	13.5089
BCL2L1	17.5553	13.2772	16.1989	18.5008	15.6457	15.8279	13.4785	14.3297	16.2662	15.5509	17.0221	13.9394	15.9097	18.2866	15.3797	15.0746	15.1214	17.9758	14.6086	14.5839	15.3678	16.195	14.7185	15.5278	15.0557	11.3745	11.1718	11.3418	11.384	14.9678	14.9102	14.7573	12.6385	13.0974	15.7266	12.0666	15.1628	15.623	15.1841	15.8321	18.6372	16.6333	16.5234	17.6852
BCR	14.4042	12.5366	15.0928	14.195	14.4793	14.9488	13.1097	13.7345	12.714	15.1623	14.0249	14.0803	14.8667	15.0066	14.5248	14.3785	13.7853	15.757	13.7714	13.6324	14.1206	14.4898	14.31	14.7909	15.4118	15.0597	16.2622	13.5466	13.1374	11.9061	14.2083	13.9442	14.8884	14.3092	14.2301	14.6913	13.9063	14.2425	13.9521	13.3906	14.9971	13.766	14.4097	14.8972
BDH1	17.6398	18.0407	17.9024	18.6971	17.0081	18.4899	18.9481	17.7794	16.6227	18.8621	18.2813	19.64	19.5837	18.9528	18.1856	17.28	16.9741	17.8327	18.3564	17.5425	15.4472	12.7831	17.1283	16.5904	18.6434	17.0655	17.9193	17.7953	17.4968	16.9533	17.4988	18.3525	16.3507	17.7378	16.6286	17.3563	17.3077	16.8996	17.0816	17.455	17.6565	17.0525	17.5747	17.7351
BECN1	16.6627	16.2573	17.331	17.0304	16.3442	16.3916	16.6793	16.2167	16.7729	16.5875	16.9216	17.5154	17.0305	16.5869	15.4161	15.4821	15.4735	16.3777	15.1536	15.667	14.9147	15.7378	16.0114	16.5085	15.0337	15.8694	16.1887	16.7712	15.3949	16.0301	15.9593	16.9216	15.0901	16.5871	16.1939	16.3795	15.1936	14.6809	15.1603	14.4357	15.0787	14.5338	15.5701	15.7037
BEND3	13.7559	10.8258	14.7252	15.1447	12.0943	13.1562	13.3948	12.8148	12.6555	12.0449	12.8153	14.4042	14.5218	10.7468	13.5235	12.2336	12.7487	14.3547	12.3378	11.6873	12.7263	13.7975	12.9953	13.6431	13.2828	12.7919	11.4293	11.4798	10.2721	11.5141	12.8233	13.3396	14.0839	13.684	12.7092	12.7707	12.4675	12.4348	11.965	11.5181	13.5228	13.7647	12.1405	14.2982
BIN1	16.0355	15.8126	15.4762	16.6213	15.5573	15.9549	15.6384	15.2504	15.1646	16.1656	16.2123	16.4755	16.0762	16.4189	14.7944	15.0158	15.9469	17.0157	15.9452	15.9975	15.2174	16.1462	15.1661	16.0356	15.5162	15.2548	14.965	15.7168	15.0773	15.9062	15.5905	15.6553	15.6104	15.7283	15.8198	16.0787	15.2313	14.5381	15.2248	15.1008	15.7553	13.217	15.6009	17.6895
BLOC1S1	17.1604	17.5776	17.65	17.9271	16.9358	17.1486	16.6398	16.1222	16.805	17.3708	16.7207	17.5079	17.7232	17.0402	16.9191	16.1344	16.449	18.1338	16.165	16.102	15.4855	16.1043	16.5027	16.7846	17.1376	17.0912	17.1069	15.9808	16.4886	17.1672	16.9516	16.8705	16.9483	16.8937	16.8523	16.7391	15.6575	16.1366	15.9976	16.1802	16.9185	16.8401	16.939	17.3957
BST2	17.729	16.7599	18.0577	18.0559	17.6941	17.0718	17.0209	16.4708	16.6268	16.8219	16.6398	16.8983	18.399	17.2825	13.8948	17.6703	18.5385	17.8361	17.8686	16.0064	15.8776	17.3308	17.3763	17.3509	13.5654	16.6628	16.0564	17.4043	15.5772	15.8323	16.3757	16.6815	16.8485	17.6098	16.6137	17.322	16.0169	16.0814	16.2224	16.3422	13.0417	12.0656	11.3049	16.8522
BTF3L4	18.2223	18.1234	19.0598	18.5838	18.3088	17.7887	17.345	18.1848	18.3053	17.7913	18.4496	18.5421	19.1652	18.1012	16.5524	17.6209	17.3947	18.7549	17.6371	16.7207	17.6931	17.847	17.0761	18.518	17.6453	18.394	17.6297	18.3581	17.6852	18.3853	17.1336	17.6176	17.7601	17.7597	17.4912	17.9481	17.1327	17.2225	17.1614	17.6737	18.31	17.8994	17.3257	16.583
CA13	17.2378	15.4414	14.2267	13.9722	16.6546	16.2495	13.9296	15.8475	12.5095	14.9249	12.1653	16.1879	16.4421	11.4981	15.8309	14.3909	16.6769	15.5031	16.086	13.4961	14.7297	15.163	15.2618	15.5732	16.7201	11.4141	14.83	12.8836	16.594	15.5209	14.5444	13.9348	15.7726	13.8119	14.6633	12.3785	14.6164	14.1009	15.6693	15.2837	15.7793	13.8217	17.1978	16.4755
CALCOCO2	15.2189	14.823	16.6684	17.1188	15.0138	14.6207	14.8407	14.2803	16.3452	14.1838	15.0317	15.4291	16.4537	15.0057	14.789	14.7647	15.2333	15.976	14.0903	14.6168	14.2615	15.0292	14.8005	14.132	13.8738	14.5787	13.8384	14.2152	14.5491	12.7053	12.1937	14.4279	13.828	15.4987	13.9901	14.4505	14.2061	15.0366	14.6863	14.3591	14.2568	13.8963	15.259	15.103
CAMK4	15.0799	15.2471	15.2248	15.9785	14.5392	15.5061	16.0117	15.4828	16.4243	15.8992	14.9182	14.8305	13.6367	16.1294	15.337	14.0669	14.599	15.5322	14.289	14.1352	14.5392	15.4916	14.4164	13.3097	11.5021	14.7047	14.9711	15.645	13.8862	12.3212	15.5113	14.64	15.7949	15.1617	14.6759	15.4666	14.8094	13.3708	13.9961	14.3774	13.608	12.0595	16.0896	12.5299
CANT1	17.0189	17.907	18.2117	18.2996	16.783	17.3274	17.3574	16.5955	16.6063	18.2906	17.0604	19.3452	18.7625	17.778	17.7829	16.5871	17.0825	17.5692	15.8582	16.8174	16.5495	15.9526	16.61	12.3558	16.6315	17.4775	17.2376	17.4519	16.521	17.2593	16.6025	17.9796	16.4196	16.2875	16.1315	16.2651	17.3997	17.28	17.3156	17.0377	17.6987	16.5707	18.0765	16.459
CAPN5	15.6258	16.7715	14.7198	15.8164	15.387	15.9137	17.1558	14.6504	15.7174	16.8159	16.4081	17.7635	15.6825	16.9842	15.3354	15.5119	14.7789	15.5781	15.1877	16.8	15.519	14.7273	15.3532	13.5971	15.406	16.1239	15.3637	16.4913	15.5745	16.1623	15.9303	17.1935	15.5794	16.4382	15.6232	15.8364	16.0317	14.7026	16.4323	17.2888	14.6555	14.0751	16.7352	15.4631
CAPZA2	20.818	20.4039	21.0313	20.9635	20.8036	20.8776	20.5149	20.5178	20.4919	21.1845	21.515	21.2259	21.4811	21.4041	19.9408	21.0455	20.4071	20.7872	21.1881	21.5551	20.4351	21.3801	20.1957	20.8042	20.3803	20.2803	20.3625	21.3617	21.3114	20.5769	21.0943	20.7948	20.2119	20.9493	20.8831	21.9144	20.2881	20.9587	21.0945	21.5791	20.3548	20.1925	19.6633	22.051
CARD16	16.4035	14.9189	16.3706	15.4039	15.5831	16.0523	14.8275	15.5249	14.3611	15.0958	16.2206	16.3359	16.2729	16.3924	13.2622	14.2236	15.4055	12.8604	13.9366	14.29	14.1789	13.4008	13.6978	16.4382	13.877	16.0706	14.9574	12.8099	16.0372	15.3543	14.6536	14.0388	14.7509	14.8288	15.1216	12.5544	14.2829	13.4739	15.3789	14.0967	12.598	9.93848	15.9227	13.1393
CASP1	16.0659	13.3548	14.4475	12.3863	13.525	14.2618	10.6607	14.8324	10.8585	13.7791	16.5512	15.2753	13.2969	15.5457	9.44992	13.2125	14.0684	12.9669	12.7302	12.2894	13.1437	11.7337	12.5063	13.1292	11.3824	13.1341	12.3274	12.9827	12.5932	12.4139	13.2684	13.2488	13.601	14.1034	12.9021	11.8579	12.3179	12.7064	13.039	13.207	12.0976	10.5086	12.3132	12.8762
CASP10	15.5452	15.3314	15.2414	16.2882	14.8437	14.907	15.1047	16.1019	15.4174	15.0351	14.712	17.03	15.493	14.9503	14.8449	15.0741	13.7777	14.985	12.2669	13.6005	14.2975	11.562	12.5049	15.25	14.5706	15.0708	14.9017	14.0985	13.4536	15.0841	14.6601	14.9388	14.4623	15.0196	14.2841	14.8313	14.5831	13.2269	14.4406	14.3535	12.9059	11.6647	14.729	14.2585
CASP3	17.744	15.6888	17.8671	17.6967	16.6941	15.9161	16.1387	16.4149	15.8998	16.1915	17.5893	16.3828	17.4845	16.9213	15.5224	16.2673	15.6144	18.8087	15.9033	15.7152	15.7924	15.3707	16.1423	16.2668	16.303	16.012	15.9425	16.2886	16.9092	16.1093	15.0292	16.0143	15.5244	15.8502	16.2447	15.8397	16.6814	15.8103	16.6409	14.8036	16.7783	16.1986	14.4845	16.2228
CASP6	16.7112	15.2847	17.2078	17.4327	15.9217	16.313	16.2914	16.8944	15.9339	16.638	16.8693	17.17	17.3296	16.557	15.885	16.5925	17.1192	17.4552	16.1217	16.2929	15.939	14.0663	16.4746	15.1683	16.1531	16.1626	16.0669	16.6835	16.4953	15.7824	15.222	16.3703	16.4123	15.9194	15.3887	15.5226	16.4424	16.4431	16.3901	15.6902	17.0678	15.3136	15.5184	17.7014
CASP7	15.2512	15.3922	14.6681	14.5206	15.5175	15.2628	14.0899	14.4824	13.6553	17.5265	14.8019	12.7269	17.0357	16.4768	13.6693	14.3545	12.5069	13.7726	14.3658	14.7185	12.3142	12.0782	13.5883	15.1804	14.6824	16.5133	14.788	14.5245	15.1993	13.8326	14.6156	16.0081	13.829	14.5456	15.2295	14.7851	14.6686	13.2317	14.2186	13.6183	13.2217	13.093	11.4769	12.536
CCDC12	15.1923	15.1801	17.3214	15.9167	15.4551	14.4771	12.3031	13.6536	12.7512	10.6778	14.8183	13.7523	16.4236	14.6009	12.047	14.3824	13.4011	15.876	13.7359	12.7604	15.6928	15.6241	14.9692	13.5463	12.8143	11.6446	14.3418	13.9402	14.1472	13.1753	13.8211	12.6119	15.6662	15.573	15.9114	15.9802	13.9233	14.3618	13.0406	13.3964	14.548	14.8774	13.9552	14.8695
CCDC134	15.2207	15.9642	15.7761	15.5251	16.1919	14.8521	15.4884	14.0795	14.9971	15.2363	15.5098	16.1242	16.252	15.235	14.6289	14.1429	14.9773	14.7468	14.7504	11.7282	13.511	13.2978	13.8635	15.1825	14.4177	14.4403	15.2037	15.8842	15.3398	14.2473	14.7288	15.0823	15.1167	17.1395	15.0413	19.4494	13.56	14.1083	13.2616	12.959	13.8582	13.8282	15.9829	15.0423
CCDC22	15.2812	15.1644	16.0114	16.6796	15.2932	15.0904	14.5632	14.5046	14.6524	15.1332	15.4338	16.1417	15.9169	15.7227	15.0208	14.7227	13.706	15.652	14.5644	14.8397	14.3139	15.1956	14.0133	15.5981	14.5685	14.9104	14.9814	15.3997	14.5678	14.4412	15.4569	15.284	14.2842	14.6266	15.1099	15.2082	14.5539	14.2218	14.7559	14.1073	14.6177	13.9587	14.7827	16.0741
CCDC43	15.8101	16.1546	17.5844	13.4046	16.4882	16.1618	14.6303	13.1272	13.9746	16.0197	15.6803	13.557	17.416	15.6995	15.5326	15.1293	15.6529	18.8799	15.1308	15.7851	14.8019	12.0184	13.4026	12.199	15.2536	15.0948	14.8373	12.3481	16.0436	12.472	15.1993	13.1996	14.2918	12.939	17.1981	15.5353	15.3035	15.8642	14.6902	14.7674	16.2011	15.4952	15.2176	17.2562
CCDC6	18.7129	18.5704	18.8314	19.4843	18.2331	18.3505	18.0093	18.9457	17.5969	18.4198	18.3458	18.2777	20.6936	18.3954	18.4378	17.5626	17.9902	18.7476	18.0273	17.205	17.7143	18.5014	18.0674	18.0491	18.1936	18.5163	18.4481	18.3046	17.988	18.4373	18.2736	17.6467	17.6991	18.4348	17.9347	18.8238	17.4175	17.3419	17.5378	17.1926	18.2513	17.2792	16.6417	19.1665
CCDC88C	14.5154	12.7816	15.0955	15.1034	13.7911	14.2618	13.2435	13.993	16.7572	13.53	13.5874	15.1602	15.0099	13.4214	13.9705	13.213	12.7257	14.6439	12.9025	12.8471	13.6849	14.9156	13.8685	14.542	12.195	12.9719	14.435	13.7092	13.1136	14.3808	12.6604	13.2776	15.7031	13.6494	15.4164	17.4474	13.613	14.4421	14.0714	13.2768	13.6608	13.8395	13.4339	15.61
CCNH	14.8712	13.1302	13.2882	13.9711	15.4577	11.5953	12.3534	13.5642	12.3354	14.0303	15.5009	14.4272	12.6258	12.8248	12.9202	11.8918	14.6288	13.4643	12.8003	13.7061	12.6839	11.8484	13.6407	13.3474	14.6938	13.9992	12.2244	13.2304	13.4602	15.7359	17.3822	14.113	12.9891	13.5139	14.6445	12.5963	12.5093	14.0789	11.8227	13.0036	12.9236	14.4083	13.3604	13.3986
CCPG1	13.4473	12.8267	13.5791	13.8273	12.8016	13.3628	14.3447	11.9083	12.8823	13.6783	13.315	14.0586	13.3301	13.6981	12.213	13.3993	13.452	14.1992	14.4012	12.6007	15.0672	12.8717	13.2841	14.327	12.6988	12.0388	11.3705	13.7856	11.4849	17.7535	13.2067	13.1392	13.6949	13.5909	13.7748	13.7033	12.5887	12.4147	13.5044	13.3245	13.3653	12.4256	10.3475	14.9782
CD14	17.2917	16.4286	18.696	18.4257	15.7609	15.7735	16.7722	16.2599	16.4517	17.3555	16.2642	17.8091	17.9923	17.1263	14.9525	16.9307	15.8998	16.6384	17.6241	17.7252	16.7367	19.4089	16.4496	18.1857	15.0288	16.0001	15.6654	16.7372	15.3931	17.0303	16.977	16.7866	16.1095	17.4749	17.5626	17.8267	16.6703	16.5871	16.9886	15.775	11.5237	16.1341	12.5502	13.4828
CD38	17.2235	15.6235	16.8606	15.7402	15.6866	14.2408	16.4298	14.7509	19.0422	16.8143	16.9206	17.2777	18.4843	16.3535	14.9011	18.0577	15.377	15.4049	12.9279	16.2516	16.7397	16.561	16.3892	16.3378	15.5964	15.6488	16.2061	15.0101	14.159	13.6806	14.8285	17.0421	15.1008	15.8726	16.1569	16.1874	17.0027	12.4583	17.032	14.8093	12.0933	11.2355	12.4883	13.2982
CDC42BPG	12.9151	15.9731	16.4743	14.5639	16.2209	16.0472	17.4746	15.8999	17.1329	16.7074	16.2322	17.5411	16.6104	16.1668	15.9447	14.7784	14.3067	15.2931	14.6553	13.7589	13.0073	12.1476	14.7431	16.5354	13.6617	16.3533	16.1868	15.9244	14.9281	14.9819	16.2301	12.2866	15.7747	15.9723	15.9419	16.4557	14.2211	13.8469	13.5438	13.8747	15.5565	15.2912	14.0318	15.9128
CDC73	16.5527	16.0437	17.2629	17.1932	16.4349	15.9119	16.1193	16.6777	16.2056	15.866	15.8483	17.2819	17.0179	16.036	16.385	16.2012	15.8666	17.5644	15.5563	15.1092	15.9147	15.5154	15.8667	16.0329	15.8974	16.5494	16.0078	15.6053	15.9188	15.834	15.5299	15.0981	15.9445	15.7645	15.5112	15.3975	15.7713	16.057	15.1587	15.7463	16.477	17.0485	15.7844	16.1073
CDCP1	16.0331	16.455	16.0731	16.7759	16.9866	16.0853	16.2333	16.5104	16.377	16.038	16.0705	16.0447	16.8598	15.3445	15.3382	15.1639	14.9358	15.5447	14.8266	14.5323	14.8863	15.0253	14.5897	12.813	15.9744	15.7478	14.4188	15.7838	14.689	16.0052	14.717	15.1946	15.5723	15.4389	15.2255	15.8133	15.3222	14.1876	14.6663	15.2488	15.4634	14.9468	14.8649	17.3914
CDKN1B	16.1874	13.0718	14.9213	15.3559	13.3087	13.3853	14.016	13.106	11.7024	15.6052	14.4834	13.9427	15.6189	15.0281	11.8656	14.1046	12.7824	13.017	13.3578	11.0776	11.9525	12.9199	12.798	15.2053	12.208	12.7345	14.4198	14.0129	11.7222	12.9155	14.7829	15.4282	11.4969	15.2205	9.00945	14.9107	10.9313	10.777	12.0611	11.8627	12.413	11.5773	12.8856	11.5296
CEP170	14.6081	13.8075	16.0022	15.6772	14.1398	14.8177	13.9922	14.8519	14.3508	13.7606	13.6971	14.2841	15.5335	14.4109	12.3071	14.2038	14.2719	16.8059	14.4006	14.1851	13.479	15.1716	13.4871	13.0178	12.7092	14.088	13.0331	14.2482	14.2361	12.8503	15.2692	14.6073	15.4002	14.4484	14.7304	15.3058	13.2065	13.422	13.7992	13.161	15.2784	15.3237	13.5621	14.2698
CEP250	15.3927	12.425	15.7578	14.3144	14.1287	12.1276	12.5191	12.0051	14.5169	13.7873	14.0607	13.6829	14.6219	14.4417	12.9372	13.3873	12.1971	15.7596	13.1325	13.0893	12.6164	14.2615	14.0141	12.5489	12.9114	12.1152	11.3417	13.4505	10.8571	14.1446	14.9	13.5951	12.4064	12.7658	12.863	13.7441	13.0123	13.4013	13.0997	11.6305	12.7405	13.4615	11.4499	12.4532
CERS2	18.0939	18.1933	18.1336	18.4889	18.6188	16.752	16.815	17.2286	17.4632	17.2523	17.4475	14.5839	18.3131	13.6137	18.2918	17.3086	16.9474	18.4776	16.7405	14.1733	15.6615	17.1813	16.7241	12.7036	17.0062	13.0933	12.0862	12.4586	16.7281	12.5633	16.8004	17.2109	17.5584	16.4039	16.7978	16.4899	16.7529	15.2424	16.1872	16.1953	17.5294	18.3054	18.2432	18.0694
CETN2	16.6926	15.2044	18.2578	17.0629	16.3837	14.5444	16.3971	15.8683	16.803	17.328	15.6608	14.1218	16.8589	15.7487	16.1658	15.3123	15.6896	16.8089	15.441	15.6704	15.5549	16.5057	15.498	17.3087	15.2884	15.445	15.7474	16.7519	15.4137	15.8997	15.374	15.0229	14.9432	16.1961	15.528	16.125	15.4854	14.3668	14.6289	15.5004	17.3756	15.9846	15.3808	16.8629
CFP	12.4215	13.3596	14.3473	14.8835	12.6033	13.5087	12.6573	11.2612	12.1855	13.6191	11.7641	14.0736	13.8259	12.5479	10.6059	13.2663	12.1465	14.4303	13.5959	12.9012	12.6801	16.0378	13.5664	13.1125	11.3133	11.5676	12.1268	11.9416	12.0628	12.8673	13.9873	13.4932	13.7546	13.6072	13.5007	14.8425	12.7455	12.8606	13.3798	12.6727	11.4611	10.4829	12.0439	12.9171
CGGBP1	16.7156	13.2815	17.8755	16.7197	15.6065	16.9843	16.5323	15.9872	16.0743	16.7565	16.0531	15.4916	15.9542	16.0661	16.3269	14.9111	14.1416	16.4942	16.105	14.5608	13.2565	13.2028	16.1255	15.3611	15.9316	16.2938	14.2995	16.9057	15.6487	15.6708	16.4389	16.1171	15.7204	14.692	15.6191	16.1129	12.1521	15.4368	13.7431	14.3456	16.9799	16.6307	14.3802	15.5465
CHD3	13.5276	13.5535	16.4138	16.0315	15.2761	15.4976	15.4337	14.3712	16.55	15.1994	14.8951	13.0078	14.4504	14.0358	15.2125	14.6082	13.6021	15.5612	13.6805	14.0474	13.3753	13.9183	14.1049	15.8565	14.2502	13.5555	12.8502	15.1901	13.0813	14.7313	15.0057	14.4368	15.6141	14.7294	15.0323	14.9856	14.176	14.2348	13.1995	13.6503	13.6567	15.1826	14.0934	11.9701
CHID1	16.8088	16.2109	18.9964	17.8103	16.228	15.7875	17.1541	15.6905	16.6948	16.9104	16.6407	16.9728	17.7367	16.5117	15.7469	16.2097	15.1124	15.5027	16.2635	16.8002	15.2351	12.525	14.8478	17.3965	16.3266	15.5553	15.624	16.1686	16.8294	15.9654	17.2381	17.1008	16.3157	17.0705	16.7315	17.2338	16.574	15.8549	16.1738	17.0178	16.2959	16.3019	17.0486	16.7826
CIAO1	15.04	16.2929	16.5543	16.5501	16.8771	16.4336	16.8041	16.6662	15.998	17.2234	16.2616	17.7888	17.3336	16.7889	16.7087	16.1875	15.7859	16.4754	15.6478	15.6425	15.6216	15.1685	15.2763	16.3512	16.5406	16.6719	15.9711	15.7988	15.5464	16.9122	16.2974	16.4245	15.9184	15.9731	15.5855	16.7035	16.0536	15.6926	15.4732	15.4239	15.728	16.5863	16.1464	16.1621
CLEC12A	15.8471	17.3289	14.1104	14.5602	17.2156	18.1965	19.3507	18.05	17.8891	18.9415	18.2543	14.7647	14.24	17.9026	17.7922	18.2643	17.2502	13.9735	17.6528	18.2771	17.613	21.5818	16.3835	18.7234	17.7696	18.9532	19.4381	18.3435	17.6411	18.9659	16.7957	17.7516	17.0209	17.5224	16.5655	17.7199	18.7255	18.1042	17.2603	17.916	16.204	16.8798	16.5139	13.6807
CLIP1	15.8784	16.0687	16.9156	16.5596	15.5962	15.6523	15.575	15.2972	15.6369	15.6826	15.2764	16.2277	16.8065	15.3929	15.0675	15.597	15.5603	15.8284	16.2607	15.0466	14.7215	16.0206	15.3032	15.8822	15.4693	15.4239	15.2592	16.0224	15.7255	15.5578	16.627	15.7713	16.0597	16.3598	16.6097	16.93	14.3542	14.6154	14.8092	15.1417	14.632	14.5624	14.9916	16.6264
CLIP2	15.3632	14.6139	15.5641	16.6378	14.6073	14.7048	14.048	14.489	14.4618	14.8578	14.1716	15.7346	14.7764	15.2535	13.5421	14.1593	13.5204	14.6749	14.1806	14.3375	13.7443	15.3929	13.95	13.7059	14.2073	14.7175	14.2875	15.7179	15.2158	14.6039	15.4098	15.2899	14.6015	14.8504	15.1617	14.6485	14.3082	14.3262	14.6401	13.9833	14.3852	14.5569	15.016	15.8559
CLPTM1	16.9448	17.5049	18.1123	17.3001	16.5949	14.6802	16.5757	15.7283	15.9384	16.3859	15.9954	17.0103	17.6724	15.6129	16.5763	15.2461	15.9355	16.2957	15.1778	14.6309	15.1767	15.4229	16.1166	15.4804	15.1622	14.6987	14.3014	14.2182	13.7136	15.6017	15.4705	12.31	16.1457	14.6407	15.8052	14.5512	15.4224	15.1712	15.7313	15.567	16.321	15.4548	15.7585	16.7533
CLTA	18.6747	17.3664	21.0505	19.7609	18.8674	17.9545	17.871	17.6587	18.1159	17.5938	18.7915	19.0434	20.0884	18.5423	17.7286	19.536	18.7072	18.5596	18.302	18.5986	17.2587	19.0263	18.989	18.6098	17.6384	18.0164	18.0409	18.0507	18.1796	17.9382	17.9202	17.2723	17.0192	18.0315	18.1881	18.4262	18.0071	18.0582	17.7279	16.9125	18.1515	18.1813	18.2327	20.138
CNOT4	12.9791	12.4234	15.9452	17.1846	15.4998	15.3442	15.4936	16.4793	14.0521	15.04	15.1085	15.7797	15.7875	14.9521	14.6693	14.786	15.3731	17.0136	14.9432	13.8635	14.2047	14.9965	14.8235	15.6056	14.2602	14.97	15.3315	12.3245	14.4142	16.2639	14.8668	15.1196	15.7974	15.469	15.0034	15.4512	14.1559	14.5447	14.2828	13.5474	14.9918	15.3681	15.8372	18.3048
CNP	16.8174	17.1275	18.2549	18.1833	16.6792	16.3429	17.2758	16.7587	17.5772	17.1513	16.6016	17.909	17.5578	17.2932	17.3907	16.9958	16.5208	17.4825	16.4403	17.0604	16.5973	17.8508	16.7141	16.866	16.819	16.3088	16.4655	17.2134	16.5461	16.9242	17.5994	17.1267	17.3101	17.9007	17.2849	18.4512	16.1295	17.9378	16.5857	16.7079	18.0136	16.7788	16.8852	17.1028
COA4	16.0938	15.6005	16.2258	13.6064	14.3511	14.8955	14.4018	15.7851	15.9065	15.9681	15.8307	16.0357	15.7716	15.5806	16.2825	15.6171	14.9457	17.4988	15.8416	15.3474	15.1834	14.5736	14.7956	15.2401	13.863	15.1282	15.2964	16.9021	14.344	14.0664	12.1019	12.6326	14.2087	14.5014	12.5062	13.6392	15.5449	15.9566	14.9569	15.3091	14.7548	14.8498	16.5019	15.7834
COG2	16.425	17.9731	17.5328	16.3994	16.7225	16.8893	17.1569	16.5756	16.8382	17.5895	16.7239	18.179	17.6309	17.1805	17.7942	16.4085	16.6149	16.6973	16.3411	16.5695	16.3519	16.2502	16.533	16.6536	17.5155	16.5116	16.4765	16.9518	17.4398	17.0034	16.7574	17.4622	16.4262	16.3782	16.3715	16.5575	16.5949	16.2172	16.6983	16.0428	16.7172	16.7693	17.1221	17.9532
COL15A1	16.3668	16.7767	19.0823	18.4695	16.2452	17.1286	17.2037	17.8144	18.1729	18.5585	15.9839	17.2739	17.124	18.482	15.8095	18.1563	17.5977	17.4105	19.4815	18.2201	17.8413	20.0303	17.3892	16.9061	14.8802	17.1525	17.887	18.2922	14.9321	16.9005	19.0019	18.3893	18.6526	19.0773	19.2349	19.4915	16.0549	17.1957	17.7104	16.8407	11.5158	12.0072	11.8392	13.326
COL17A1	15.1504	15.1952	15.4111	16.6758	14.7772	14.8017	12.5682	12.2272	13.4399	11.9146	15.7461	14.6451	14.2664	14.7665	13.8508	13.7316	12.9607	13.011	14.2632	10.9659	13.5008	12.7873	12.5817	13.115	14.9618	12.2836	13.2324	13.156	11.9442	14.5788	11.4979	12.2291	14.1898	12.0708	11.3024	12.893	13.0537	10.9048	13.4707	14.9135	11.887	15.5168	15.5911	15.9587
COL18A1	18.2669	17.3843	20.3769	20.5669	17.3036	18.7645	17.9965	17.8787	19.2759	19.4111	18.2899	19.3457	19.3947	19.4532	17.7309	19.6487	18.772	18.059	19.8459	19.087	18.2768	20.8765	18.8318	18.2475	16.6361	17.3365	18.2549	18.5373	16.288	17.5398	19.5757	20.4036	19.5492	19.4738	20.2996	20.6045	17.6971	18.7933	19.7963	17.6895	10.9245	12.6064	11.6881	13.6521
COL4A2	17.3548	16.1177	18.7039	17.8435	17.7948	17.2085	18.4056	18.4772	18.9363	18.251	17.0567	18.2502	17.975	17.6816	16.5941	15.6252	14.9661	17.3289	16.4962	15.0323	15.0338	19.788	15.9697	17.2149	16.2608	16.9087	17.4482	17.877	15.892	17.4021	19.0339	16.5244	17.7803	17.3684	17.8164	19.7845	13.9093	14.9809	17.2953	13.8439	16.2754	15.6914	17.6109	17.3023
COL7A1	16.0464	14.955	19.1636	17.6887	15.2152	15.5789	15.3742	15.7443	13.7774	16.2906	14.261	13.5952	16.9428	13.7829	12.1062	16.8582	14.0462	16.018	13.4378	10.8815	14.1206	15.7916	16.5291	12.6467	14.8301	15.3522	13.661	15.2373	14.1128	14.1248	14.0083	14.0102	14.9518	14.1376	14.9763	17.5666	13.4123	13.923	14.1386	12.7324	12.8942	12.0304	11.1641	14.2504
COMMD4	14.4127	13.907	13.8974	13.8491	15.1981	14.0799	13.6568	15.2469	14.8208	15.2967	15.178	14.16	14.076	11.8775	15.0974	13.0258	11.9106	13.2008	12.3838	14.2025	13.7344	13.2169	13.4984	15.4469	12.711	13.1591	12.7721	14.4613	12.5678	14.961	15.3855	15.1611	14.0569	14.8073	14.47	15.3009	13.7451	14.0566	14.2189	14.1484	13.7003	14.7648	14.2288	13.4251
COX20	13.3649	17.0181	16.8076	14.2893	16.7225	16.1852	16.7825	16.5203	17.1898	15.977	16.3633	13.2603	16.2434	15.5491	16.801	14.0563	14.7978	15.4053	15.2985	14.3279	16.11	14.7964	15.8674	13.5075	16.5763	15.0738	14.8223	17.0559	15.614	16.0317	16.2912	14.473	16.0265	15.8624	15.7013	15.2394	14.8434	15.6259	15.1422	15.9942	15.7617	15.0888	16.2732	16.9404
COX6B1	18.4899	19.2265	18.2976	18.5428	17.1716	19.2959	19.8607	18.7309	19.5764	19.5759	17.9157	19.7147	21.9468	17.8557	19.1741	18.9878	18.2829	19.9375	19.1874	18.2142	17.6808	18.709	19.4078	19.0028	17.8845	18.1711	18.7807	18.9062	17.4078	19.1027	17.8818	17.9424	17.6322	18.0754	17.5987	19.7372	17.8703	17.1974	18.3574	18.1357	19.0418	16.4493	15.9463	17.5665
CPD	16.0715	16.7904	17.8008	17.5555	16.91	16.6269	16.2984	15.5346	15.7138	17.0524	16.6479	17.4556	18.1845	16.503	15.7795	16.1592	16.1476	17.1849	14.6113	16.1015	15.979	15.9188	16.4363	16.7015	16.2371	16.0996	16.1117	15.4733	16.4716	15.936	15.7503	16.6173	16.0114	15.9781	15.7776	15.1116	15.8136	16.7534	15.7746	16.0221	16.3393	17.0654	16.5303	16.3162
CRELD1	16.0595	16.1231	18.5146	16.5711	15.4788	14.4825	15.3204	15.2826	15.1646	15.738	15.3005	16.6899	16.8723	15.7593	16.117	14.644	14.567	15.0026	15.9578	14.5773	14.6408	16.2243	15.18	15.5532	14.5175	15.3554	15.1994	15.6638	15.1286	14.7679	16.0565	15.3453	15.2825	16.3044	15.9172	16.4329	15.0046	15.3418	14.981	14.7278	14.9552	14.5997	14.3296	15.7102
CSNK1G3	14.6411	14.4931	15.1715	16.2772	14.089	13.3986	12.9263	13.6763	12.1174	14.3673	14.0568	14.2641	14.7553	12.8748	13.5003	14.518	14.3935	17.2429	14.6392	13.2294	15.2377	15.0439	13.721	11.6808	14.3921	12.4229	11.3509	12.5874	12.5307	12.8873	12.2979	14.5323	13.6855	14.9536	13.0951	14.7102	13.4392	12.5798	13.1314	12.6377	13.0728	12.6182	10.7802	13.4619
CTBS	17.493	17.8432	17.7536	17.7829	15.5548	16.1198	18.1396	16.3242	17.3988	17.8182	17.233	18.7664	18.5646	17.3041	14.3957	17.2884	16.3164	16.6479	16.0052	17.5109	16.4739	16.9867	17.0127	18.4621	16.4477	16.9267	16.7067	15.7666	15.3775	17.3989	16.7001	17.4912	16.5111	16.3878	17.1921	17.376	17.1908	15.8304	17.2236	16.8777	17.4426	16.463	16.1236	13.9502
CTDP1	15.386	13.4383	15.0098	15.2619	14.7052	15.0635	15.2553	15.4638	14.5834	14.8058	15.1147	15.2155	15.4918	14.8922	14.185	14.8285	13.8447	15.9603	13.5509	13.9867	13.2744	14.4281	14.1299	14.2548	14.5736	15.1549	14.3923	13.7938	13.7939	14.5911	14.1629	15.3607	14.4381	14.6247	14.3569	14.6035	13.3975	14.06	13.9013	13.9912	14.8919	15.1771	13.7366	12.6859
CTNND1	17.0716	17.3026	17.7455	17.8354	17.1245	17.3697	16.7946	15.8889	16.0466	17.191	17.6881	17.1673	18.389	17.6185	16.2545	16.9901	16.4535	16.9681	17.0732	16.4451	16.8703	16.3637	16.7287	15.8209	16.5473	16.7557	16.9537	16.8587	16.6013	16.8649	16.7376	17.2931	16.6307	16.916	16.3654	16.5682	16.9412	17.0991	16.5875	17.733	17.1794	16.2925	17.2352	17.6933
CTPS1	17.4744	16.7536	17.4561	14.229	16.157	16.6614	15.991	16.4808	15.6161	15.691	16.6778	16.6728	17.9777	16.2429	16.3673	16.8911	17.1565	17.9513	16.7314	15.7164	15.8928	17.5693	15.692	16.2208	16.4822	16.0577	16.416	17.1043	16.0396	15.2219	16.3814	16.0419	15.4327	16.6881	16.654	17.3044	15.4731	16.0023	15.952	15.7324	17.5016	16.4519	17.1669	17.2678
CTR9	15.7101	14.7035	16.7371	16.4882	15.3456	14.7324	14.9386	15.4	14.9463	15.2203	14.7618	15.8394	13.6375	15.2832	15.4747	14.9928	15.1234	17.1758	15.2908	14.7933	15.0709	15.6608	15.1453	14.921	14.6442	15.1511	15.0939	15.2977	14.7215	14.8519	14.8011	14.6	15.0386	14.0855	14.6423	14.9404	15.011	15.6434	14.9127	14.8912	15.4905	16.3943	14.6163	16.1571
CTRC	12.3403	11.7362	13.9255	14.0323	13.0977	11.3288	12.7609	11.7747	12.8561	13.7104	15.7006	17.1685	13.3965	16.2509	11.1592	12.3561	10.6269	13.2772	11.9866	12.1476	12.2196	12.7275	12.8949	13.1072	12.6166	12.8309	14.9898	14.2606	13.8894	12.5064	12.249	11.3148	12.1225	14.1054	12.2513	13.0265	14.3364	14.4466	16.7023	13.0379	11.5612	11.7665	12.359	13.7706
CTSA	17.5005	17.7013	14.8773	18.2136	17.5375	17.5684	18.3877	17.0554	17.4438	17.842	17.2507	17.9992	16.7636	16.6494	16.276	17.2056	16.5306	17.2865	16.3909	17.7591	17.0149	17.3284	15.7767	17.5404	16.4169	17.3122	16.8039	15.9262	15.7622	17.1042	16.77	15.8801	16.3778	18.0221	16.1774	16.8261	17.0274	16.6953	17.3079	17.2006	18.1468	16.403	17.7775	16.6389
CTSC	17.1134	19.2046	16.7851	17.7151	18.2788	18.7147	19.3978	17.7361	18.5282	19.3283	18.4145	19.0176	16.6518	17.1695	16.6883	18.5274	17.2658	18.6111	17.2701	19.162	17.9271	18.3144	17.4301	18.7061	17.3669	18.3148	17.8394	16.8451	17.955	18.0849	17.6754	17.5583	17.6446	17.9866	17.331	17.5768	17.7792	17.5795	18.2502	18.1323	18.9326	15.7436	17.8273	19.3075
CTSZ	19.6005	20.5106	21.7824	20.2577	19.5357	20.15	20.8617	19.5657	20.2748	20.5801	19.3562	20.4279	21.7041	19.2654	19.4934	21.0034	18.5273	19.6647	19.3745	20.7488	18.7445	19.2066	17.2565	20.1251	19.4336	18.7975	18.7872	18.4997	20.576	20.8964	19.9698	19.6193	19.4592	19.2459	18.9809	19.1649	18.9077	18.9241	19.9138	19.1678	21.6914	16.6753	18.8192	20.1582
CTU1	15.9536	14.1822	15.4048	16.5644	15.71	16.4824	12.2834	15.2616	12.4365	13.0655	14.2559	14.3418	15.6694	14.537	14.7976	13.2875	15.5994	16.2848	14.2815	13.3921	13.5678	11.9511	14.4875	13.4385	14.0274	11.0132	13.0327	13.169	14.5264	13.6145	14.3818	14.3331	15.7629	16.655	15.7438	15.8138	15.1287	14.5771	14.2346	13.3505	14.5521	15.489	16.0919	17.3568
CUL2	16.5827	16.1484	16.9584	16.5525	16.1941	15.8858	15.2574	15.4956	15.8723	16.3539	16.0402	17.2595	17.4568	16.0558	15.6224	16.0355	16.2535	16.8321	16.3296	16.3361	16.0607	16.5261	16.1031	16.1379	16.2562	15.9363	15.3003	16.0763	15.8507	15.7697	16.3134	16.6071	16.2831	17.0252	16.6313	17.1455	16.3244	16.165	16.1633	15.5927	16.4222	16.4727	16.2692	16.3393
CYBB	17.1785	16.1777	16.286	17.6693	15.6642	15.8199	16.9449	15.8938	17.1014	16.617	15.9338	17.1259	16.9767	15.6304	15.0257	16.8151	15.0051	16.28	15.9852	16.7902	15.8986	17.1813	15.9019	17.5426	14.9101	15.8392	15.057	15.613	13.7567	17.0232	15.9801	16.4457	15.7493	15.8	16.9975	17.1037	16.1428	15.0997	16.3137	15.7461	12.7949	10.9159	17.377	12.3468
CYC1	19.7958	20.0832	19.4429	20.01	19.0012	19.4991	20.1688	19.2762	19.4647	20.5317	19.948	20.9974	19.994	20.2878	19.8132	19.0548	18.7721	20.0169	19.9242	19.2452	19.2339	18.9733	20.2458	18.0623	19.9202	19.437	19.8326	19.5764	16.9174	17.4421	19.8497	19.4123	19.0435	19.5333	19.1236	20.0441	19.4413	19.0599	19.3617	19.8292	19.1883	18.3433	18.8824	18.0905
CYP20A1	17.0994	17.2854	18.0176	18.5291	16.4042	16.3184	17.4231	16.49	17.848	17.4892	16.8943	18.4156	18.2503	17.3322	16.7645	16.6507	15.8026	16.9582	15.7215	16.0706	16.2737	17.4117	16.0854	17.6326	16.5777	16.6288	16.9245	16.6171	15.7328	16.9675	16.5217	17.086	16.1597	16.3961	16.4241	16.671	16.1517	15.3967	16.4194	16.4831	16.1842	15.7176	16.9946	16.8489
CYP27A1	17.6294	16.7363	17.4172	19.0895	16.5074	16.0746	17.7077	16.3587	17.3057	18.0457	17.6029	18.1599	17.8284	17.5641	16.234	15.791	16.2957	13.7638	18.0021	16.8448	15.2086	17.524	17.2934	18.5539	16.7948	15.7854	17.5452	15.6748	16.1342	11.9226	17.2149	17.6182	15.7668	16.6893	17.3723	16.5314	15.1328	14.076	16.7277	16.164	16.3123	12.1657	17.2776	17.7245
CYP51A1	16.7929	17.233	16.8966	16.7907	17.2338	15.8222	15.8779	16.5104	16.7341	15.7121	16.5561	17.101	16.9767	15.1168	15.9256	16.0217	16.6845	17.9337	15.5944	15.3699	16.8771	16.3486	16.4517	16.2879	15.8732	15.6728	15.0294	16.2029	14.9217	16.0689	15.3325	15.1419	16.4356	15.1294	14.862	15.9615	15.3268	15.445	16.3013	16.6397	17.9189	16.4175	16.774	16.5939
DAPK1	16.602	18.4249	17.2536	17.2068	15.6042	16.2414	19.4524	16.8217	17.1277	17.1713	15.8359	17.1174	17.6692	16.7996	15.6645	17.2876	16.1348	13.4692	16.5335	16.7261	15.6375	12.1796	15.358	18.3461	16.5796	17.1089	16.859	17.5729	16.5695	14.6913	16.3157	15.5606	14.8171	16.514	16.3605	17.2882	16.302	14.9662	15.9391	15.3354	16.624	16.7054	12.0471	16.9988
DBR1	15.8983	15.5657	17.3302	17.3685	16.257	15.1883	15.6228	15.6955	15.5951	15.3181	16.2798	17.0114	16.6394	15.9926	15.6812	15.5041	16.146	16.9145	15.3563	15.2747	15.6214	15.3564	15.9774	15.2379	15.1132	15.7041	15.7415	15.5325	16.1481	14.8857	15.6314	15.5808	15.5429	16.1524	15.985	16.0058	15.7661	15.7905	15.4195	15.0074	16.6577	16.5816	15.862	17.1652
DCAKD	15.9134	13.5394	18.4037	13.9487	15.7728	11.6098	17.1008	16.8813	17.0155	17.5395	16.318	16.1787	17.3998	16.6681	15.1704	15.4897	15.7105	16.8418	15.6394	14.6733	15.1836	16.6174	15.4871	16.3123	15.3118	15.3484	16.0147	12.3919	12.1097	12.0023	15.7734	13.9833	15.8555	16.4594	15.5231	15.5375	15.7741	15.5145	15.3005	13.9329	17.0228	16.7831	16.5369	15.9612
DCTN1	16.6585	16.5571	17.5065	18.2729	16.2005	16.6843	16.6185	16.3349	16.7383	16.7479	16.3752	16.812	17.3275	16.9231	16.0119	16.7335	16.2966	16.9444	16.8029	16.8766	16.1324	17.1864	15.9418	16.8205	16.0798	16.3752	16.3605	16.9131	16.4153	16.6044	17.0716	16.9639	16.52	17.1339	17.2497	17.7283	16.2488	16.0392	16.3019	16.0761	16.1666	15.9526	15.6382	17.3381
DCTN2	17.2955	17.4924	17.9419	18.2731	17.1938	17.7078	17.8434	17.3592	17.807	17.7143	17.0782	17.9179	18.2431	17.7032	17.0604	17.314	17.4138	19.0354	17.8509	17.5099	16.7921	18.2308	17.0942	17.5836	17.036	17.4803	17.11	17.8937	17.4051	17.2491	17.747	17.5795	17.4823	17.7383	17.6159	18.1515	16.9114	16.8654	17.173	16.9405	16.6768	16.692	16.4496	18.3432
DDB2	14.6312	13.398	15.6983	16.4001	15.1131	14.9072	11.6612	15.1877	16.1358	15.4115	15.5512	16.0794	15.5243	15.3319	14.3479	14.2721	12.6547	16.711	14.0042	13.431	11.6833	12.1854	13.7715	11.7415	14.7455	15.1986	14.868	14.3063	13.8098	12.3072	14.3641	14.7955	15.6356	13.6149	14.4334	13.2167	14.3807	14.2377	13.0209	12.5281	15.0732	16.1011	13.8957	13.3235
DEF6	16.4341	15.2415	15.1634	17.1815	14.7423	15.0313	14.5186	15.119	14.7635	14.3832	14.8508	15.7281	16.0781	15.5293	13.7644	15.3849	13.4448	15.6006	13.5535	13.4266	14.3416	14.618	13.7385	16.0607	14.276	14.1586	13.6892	15.5283	14.0955	14.4853	14.9572	14.1954	14.2895	13.3213	15.0076	16.117	13.9173	13.8977	14.521	14.0828	13.3601	13.2103	13.8142	15.9671
DENND2D	14.8197	16.4237	15.6449	16.4448	14.5207	12.4449	16.0308	16.2021	15.3906	16.2705	16.0838	13.3091	16.7185	14.7291	16.6505	16.7503	12.3969	16.2432	14.288	14.9818	11.5154	12.1266	13.8715	12.7948	16.1671	15.5506	11.7996	12.797	15.3386	12.904	16.6384	17.4293	15.8388	15.8579	13.044	12.5955	14.6881	13.5394	13.5852	11.0363	14.0558	14.7924	14.0133	12.643
DFFA	15.9257	15.5461	16.047	17.3046	14.7076	15.8537	15.9204	15.7753	15.3055	15.9189	16.0941	16.1227	17.252	16.036	15.1024	15.4048	15.9284	16.1857	15.7778	14.8617	14.7755	15.407	15.2453	15.307	15.6541	15.3537	15.3118	15.7752	15.1652	15.6027	15.3943	15.1465	15.4956	15.6805	15.1404	15.5581	14.7926	15.1458	14.8905	14.61	14.506	14.6041	14.5163	16.5789
DHFR	15.614	15.2451	14.4815	15.7315	15.6873	14.9513	15.0737	15.9954	14.7752	14.582	16.1598	16.0417	15.591	15.409	15.7152	14.9173	13.7304	17.7269	13.8916	14.6648	14.2122	13.4179	14.6449	13.302	16.3773	15.3187	13.7761	15.2904	13.6866	11.985	15.11	13.5562	16.4354	15.0931	14.0374	12.7316	14.316	14.3239	14.3138	12.1144	15.9206	17.0381	16.8234	14.0364
DHX32	14.2856	15.5654	12.3805	14.8412	14.4323	14.505	15.2393	13.6951	14.9804	15.6986	15.0962	16.3505	16.462	15.4331	14.5184	12.7412	14.6995	15.7432	12.9548	15.0372	13.9493	13.8387	14.6758	13.7384	15.1644	14.3126	14.6397	16.2173	13.891	14.6084	13.8333	16.2482	14.6335	14.2427	15.0107	15.1247	14.5131	14.2849	14.3112	14.2987	14.549	15.2989	15.9104	14.4844
DHX57	13.7632	13.4258	15.0452	15.6146	14.1908	14.0563	13.2299	14.6666	13.8556	13.2369	12.7509	12.8518	15.8955	13.5402	12.9995	12.4541	13.1597	13.857	13.0326	13.2617	13.2949	14.0045	13.4524	11.1421	12.7421	13.0849	12.5043	14.8156	13.5397	13.8486	15.9542	13.6489	13.8318	15.7047	14.3873	17.1673	13.7582	13.4744	13.481	12.3602	13.4141	14.0427	13.3083	14.0997
DLG3	15.4429	17.4329	16.9646	16.8663	16.6849	16.2249	16.0865	15.8042	15.1965	16.4277	16.7535	16.5067	15.817	16.2778	17.0428	16.2096	15.7395	16.2516	16.0981	15.132	14.3185	13.8672	15.1986	15.6602	15.5764	15.803	15.122	15.2154	16.7316	15.5116	15.8808	15.5525	16.2982	16.7945	15.5146	15.8035	15.6675	14.3388	15.2034	16.0328	15.8271	16.6354	14.569	16.6035
DNAJB14	12.9705	12.9736	15.4603	14.0404	14.2051	12.294	12.8723	13.135	13.3698	13.4851	12.1753	13.1987	14.7645	12.2341	12.3069	13.554	13.6617	13.653	11.9874	11.3895	11.2694	12.8934	12.3122	12.5574	11.975	13.2955	13.3946	12.8776	12.8769	12.5915	12.048	12.7603	12.9961	12.5234	12.4072	11.2117	11.3263	11.3858	11.2511	11.3132	12.1525	13.2383	11.8529	13.5321
DNAJC11	15.6168	14.4982	15.5108	16.8044	15.0507	14.4334	15.141	14.8707	14.5606	15.1914	15.3123	15.4355	15.9225	15.3558	14.5071	15.6624	13.0512	15.5854	14.4073	14.2758	13.9967	14.5353	14.5749	13.9353	15.4802	14.7234	15.2147	14.3358	12.7621	12.7997	14.6594	14.8119	13.4496	15.1318	13.6817	14.5733	13.9894	14.403	14.2735	14.7333	14.5026	14.7675	15.0293	15.4727
DNASE2	17.382	18.2996	20.4462	17.8372	18.406	17.7582	18.4281	17.7808	17.8682	17.1796	17.0032	17.8356	19.8911	16.6368	16.9759	16.4167	15.5515	19.7697	16.9578	16.9002	16.7426	17.283	16.7901	18.3154	17.9098	17.3372	16.6708	16.4609	17.4521	17.7376	17.6845	17.1598	18.1485	17.5745	18.1084	17.7296	17.3089	16.2464	17.0036	16.1353	17.1536	18.3884	18.5196	16.8441
DNPEP	17.862	18.0129	19.492	20.7465	18.0645	16.9013	18.2951	17.4254	17.6936	17.8545	17.4735	19.5755	18.9845	18.1625	17.556	17.7703	17.2004	18.4256	17.6157	17.9654	17.188	17.9938	16.9241	17.7375	16.9948	17.8949	17.7462	18.6091	17.7457	17.7292	17.1043	17.7039	17.4949	17.3666	17.3169	17.9875	17.4468	17.2705	17.4403	17.655	17.6707	16.2115	17.4261	17.8071
DOP1B	14.5519	15.7622	15.9234	15.8418	14.4649	14.3781	14.9706	14.092	14.3452	16.2675	15.291	16.4062	16.067	15.7678	14.527	13.6734	14.169	14.4485	13.614	14.6486	14.0831	13.2864	13.7893	14.6253	14.4929	15.1952	14.7625	14.2164	14.8549	13.6946	14.0606	15.5443	14.1541	15.5669	14.5625	14.782	14.019	13.1847	14.2738	13.5804	14.8119	13.6732	14.7019	14.9375
DPM1	15.1093	16.6478	17.2674	17.6025	17.5523	16.2931	17.2484	17.1412	17.2473	17.2578	17.6992	18.4757	16.3993	17.0107	17.3961	18.1556	17.6634	17.1175	17.2898	16.5514	16.7912	16.5929	15.9868	16.6505	17.2419	16.1378	16.5038	17.3217	15.8544	16.3117	16.7846	17.1343	16.9156	16.4035	16.9183	16.5091	17.1487	17.2656	16.9928	17.1527	17.1333	17.7341	18.562	15.6143
DTWD2	12.4864	12.3257	13.9286	14.6521	12.5669	14.2328	13.9759	13.9404	11.5129	13.4479	13.3142	12.6938	14.2509	13.4239	14.3887	11.7356	13.7587	12.5964	12.8804	11.7074	12.4922	11.37	12.655	11.3219	12.3103	12.3903	10.9464	13.3467	11.5071	12.2826	13.6845	13.1155	14.453	13.0863	13.4967	12.8073	13.4915	13.0367	13.5037	13.718	14.6911	15.9692	12.9342	13.8441
DYSF	17.0799	16.4045	17.6448	18.5924	15.3037	16.1742	16.8045	16.4792	17.8753	16.241	16.2039	15.8934	18.6539	16.1272	15.6433	16.5038	15.8148	18.0896	15.6694	16.1478	15.8053	17.8305	15.4793	17.281	15.7822	15.7472	15.7028	17.1102	14.6472	16.8051	17.2624	15.5469	16.1858	17.1499	17.3112	17.8155	15.3681	14.9096	16.0643	14.6369	12.3705	11.2347	16.2928	14.1197
E2F4	15.0736	15.5699	16.2303	16.7498	15.3098	15.7893	14.8301	14.5483	14.8462	16.2841	14.3141	15.8516	13.6043	13.8228	15.7153	13.1994	14.212	15.7193	13.0258	13.9287	13.9208	13.4822	13.6521	12.8613	15.4972	14.405	14.4606	14.4381	15.0313	11.4712	14.5236	11.6766	15.2904	15.2564	14.7774	12.5949	13.6058	14.4064	13.682	14.0085	14.3173	14.8579	15.4974	15.9163
EAPP	14.8421	14.0891	15.9097	14.638	16.6561	13.1788	14.798	13.8733	14.613	14.3007	14.6121	14.7574	15.1081	14.037	14.692	14.4189	13.8141	15.9015	13.4524	13.5544	13.6591	12.4046	13.1074	13.1286	13.8045	14.6152	14.9215	12.6883	13.457	14.0873	15.098	15.0503	14.1328	14.8049	15.3815	12.1918	13.2143	14.1655	12.0407	12.9172	15.3571	14.1639	14.0043	13.0408
ECI2	17.7726	16.7662	17.2477	18.1894	16.7726	17.4302	18.7511	17.3611	17.0764	17.8692	17.3937	18.0787	18.9647	17.8099	17.4522	16.406	16.6432	15.7245	16.7161	15.8995	15.3282	16.777	15.1103	16.7907	15.4902	17.4189	17.5524	17.1411	17.3595	15.3134	17.378	17.9097	16.2393	17.0453	16.9493	17.5785	16.8566	16.6344	16.4479	14.0641	16.8988	17.2061	17.2392	17.835
EFNB2	13.9838	16.5994	15.4491	15.2703	15.0928	15.0419	14.3302	12.2024	13.3209	14.8219	13.6657	15.9486	16.2917	14.3116	14.2811	13.5493	13.8043	14.1409	12.8462	14.096	14.4749	14.3045	13.7245	13.386	14.7771	14.8029	14.9356	14.4766	15.2443	15.0605	13.4548	15.233	14.4788	14.3689	13.691	13.8713	13.4252	12.8268	14.4774	12.5849	13.6313	11.7891	14.042	14.5781
EFR3A	16.0833	17.0869	17.2827	17.1558	15.6577	15.2355	15.7193	11.1658	14.9546	16.4523	15.0311	15.9354	16.3828	15.6525	14.6354	14.9062	14.6284	15.9446	15.1864	14.8787	14.9125	15.75	14.6962	12.019	14.9703	14.6833	14.9615	16.7711	13.8294	13.4665	15.1715	14.8724	14.6132	12.6569	12.6042	15.7799	14.5268	14.2651	14.9747	14.7657	15.3358	14.0967	14.664	17.8043
EIF4B	19.0433	18.4189	18.8968	19.2151	18.3774	18.0225	18.2395	18.3702	17.8448	18.0407	18.6631	18.1065	18.8077	18.0058	16.6181	18.1425	18.5967	19.5623	18.2451	16.9582	17.7162	17.7409	18.7393	18.1119	17.9041	17.3694	17.5746	18.6173	17.8216	17.8287	17.3965	17.5369	17.8663	18.5389	17.7894	18.3014	18.2104	18.2813	17.6215	17.7717	18.7708	16.9476	18.447	18.7935
EIF4E	19.996	18.9174	18.6374	20.4305	19.0951	18.9515	19.0656	19.2878	19.3522	19.3361	19.6419	17.9584	20.049	18.6323	18.1582	17.8429	18.6577	18.9965	18.5582	18.8755	18.8287	16.761	18.7167	18.325	18.5493	18.9736	18.1309	19.4259	19.2674	19.0081	18.9124	18.7115	19.0772	19.4325	18.8553	19.367	18.8938	18.763	18.6311	18.3958	19.768	19.4302	18.9547	19.9437
EIF4ENIF1	14.2631	13.3347	14.3945	15.353	13.9439	14.6319	14.0084	14.0548	12.8392	12.5141	12.7375	13.4439	14.6491	13.5026	14.1153	14.0929	13.5907	15.9125	14.1353	13.3779	13.8146	13.9993	13.1063	13.2658	14.3705	12.5303	12.7707	13.5815	13.4022	12.0241	14.851	12.6314	14.8031	12.5452	13.0156	12.5723	12.8856	14.3251	13.8825	12.5736	14.1749	14.1205	13.7048	15.3573
EIF4G3	15.483	16.0157	16.0766	16.3647	14.6969	15.3196	15.5279	14.7057	15.2097	15.7239	14.8293	16.3304	16.0744	15.7204	13.9764	14.5942	14.2262	15.6695	14.4059	13.9857	14.2524	14.9446	14.471	14.8516	15.0733	14.9524	14.9378	13.3879	14.9814	14.7226	14.8229	14.4279	15.7651	15.2968	15.1871	15.1976	13.748	14.3265	14.0446	14.4546	13.8773	14.7468	14.3017	15.8463
ELP2	16.285	15.7519	16.6275	14.6981	15.9151	15.4443	15.4049	15.7368	15.746	15.2879	15.9936	16.943	15.3176	15.5075	14.2157	15.0401	15.5912	16.3304	15.6833	15.3629	14.9009	16.0587	15.0975	15.6229	14.6017	15.2762	14.8802	15.2919	14.4854	16.0675	15.3507	15.4726	15.2213	15.3538	15.8022	15.5507	15.4681	15.5773	15.2534	13.8454	15.8302	16.1101	15.1197	16.1516
ELP4	16.0814	14.0466	16.0915	16.2849	15.3906	15.3313	15.9361	15.5796	15.955	14.684	15.2387	13.2778	17.126	14.5086	15.2521	15.4442	16.539	17.3986	16.3401	14.4613	13.4851	16.2848	16.4511	13.7073	14.8571	14.791	11.4959	14.9853	13.8572	11.3464	16.2235	13.3526	13.2074	15.003	16.8635	14.3788	13.8081	14.7802	15.162	14.2722	16.1998	14.3791	14.5805	15.2896
EMC4	16.8983	17.4581	18.5157	14.4177	16.2725	15.9136	15.47	16.3812	15.9366	16.2857	16.7888	16.5055	17.623	15.8571	16.4404	14.5687	15.0582	17.2682	14.6153	14.5192	13.8925	15.3278	16.0927	14.8987	16.8199	15.7143	15.3997	12.7027	15.264	15.422	16.2403	15.4218	16.3373	13.6093	16.0751	15.8982	14.0353	14.4675	15.4633	15.0958	14.126	16.3195	16.2525	18.1103
EML4	17.4013	17.4932	17.838	18.7119	17.7569	18.0006	17.987	17.1518	17.6541	17.4994	17.9542	17.8688	18.3847	17.8128	17.4166	17.9759	17.8052	18.9558	18.4635	17.7368	17.8286	17.0715	17.7988	17.7734	18.2559	17.2915	17.7763	17.8015	17.8715	18.0447	17.9492	17.6097	17.8339	18.2492	17.6346	17.4648	17.7799	17.3666	17.6289	17.7848	18.1724	17.0425	17.9354	18.334
ENO3	19.0794	20.8459	13.9648	14.436	20.3639	20.0527	19.1134	11.6739	13.093	21.2169	20.2822	13.2073	13.5451	18.9147	18.0475	22.1869	20.7984	16.611	22.0494	22.0856	20.9483	21.1096	20.5463	19.7741	19.224	19.5471	19.2955	18.3187	18.8726	19.3991	21.0149	20.7034	20.1217	21.5224	21.4083	21.7336	22.3389	20.9397	21.834	20.7365	21.7475	21.5835	21.158	12.6585
ENSA	18.0561	18.4225	16.9326	18.984	18.6808	18.1973	17.499	16.967	16.4894	17.9177	17.8659	17.7917	18.3645	17.8851	17.698	15.8443	17.2839	17.2638	17.471	14.824	15.5005	15.1406	16.3887	17.0134	17.2156	16.6861	16.7004	17.0407	17.8561	17.1327	17.5832	17.2363	18.2073	17.9864	15.8478	17.5015	16.4656	16.3348	15.7683	16.147	17.6221	17.4482	17.2626	17.1547
EP300	13.6577	13.7592	14.5816	14.7051	13.45	15.1405	13.8933	13.6164	13.7597	13.5924	13.9208	14.1074	13.9896	13.2375	14.2411	12.6198	12.9323	15.0173	14.2672	11.6165	12.1484	13.6481	13.0571	12.2696	13.0503	14.8838	12.9878	12.4645	12.7893	13.2774	12.2148	13.3507	13.382	13.3388	12.6536	13.6099	12.831	12.5026	12.7278	12.4683	12.9713	13.7157	12.9194	13.6112
EPB41L5	14.7929	14.8521	15.0416	13.3191	14.4808	14.6546	15.1187	13.9851	15.4123	14.6968	14.638	15.0501	14.5077	15.0877	15.8652	13.4651	13.9817	16.2022	13.6998	14.7202	14.2377	13.4389	15.6194	15.37	15.0092	13.6715	14.4825	14.6869	14.8794	15.1146	14.9342	14.6349	14.7495	16.0036	15.2868	15.3684	15.0148	14.9464	15.304	14.5324	15.4003	16.0887	15.5193	15.903
EPS8L2	16.3341	16.1203	18.0527	17.0603	17.1012	16.6556	16.0492	15.9056	14.6838	15.7288	16.6664	16.23	17.9459	15.9518	16.6212	16.1782	16.0849	16.5035	16.3508	15.0659	15.2551	13.2784	15.1681	13.0751	15.7857	15.3606	15.3037	15.9498	16.011	15.5052	15.4715	15.7712	15.8101	15.6622	14.9158	15.3705	15.6398	15.7998	15.5524	16.9427	17.5505	16.5217	16.7249	17.3825
ERBB2	16.3509	17.326	16.8394	16.8053	16.4516	16.6338	15.7425	15.3602	15.5488	16.7322	16.9669	17.208	16.9693	16.4264	16.3297	15.5462	15.9323	17.6071	15.5938	16.1352	15.8532	15.4049	16.1873	15.2488	16.3195	16.0909	15.8456	15.7454	15.9248	17.918	15.344	16.0431	15.1442	15.8782	15.9317	14.2519	16.2868	17.2261	16.2886	15.9609	17.0635	17.1455	15.9558	14.9283
ESRRA	14.77	11.6443	15.1386	15.0938	15.0512	14.7548	13.2799	14.4063	12.8914	14.2157	14.2422	13.647	15.2928	13.9531	13.7676	12.9218	13.2266	14.906	13.2739	13.3895	14.1756	15.4634	14.6079	12.7766	13.5092	13.9877	14.3506	12.6502	12.1422	12.8409	12.0638	12.1948	13.0802	13.5812	13.4476	13.0681	13.711	14.0774	13.651	12.3072	13.0946	11.4144	13.3596	12.8118
F11R	17.2684	18.1958	18.7852	20.2255	17.8962	17.1356	17.3127	16.6785	16.4723	17.527	17.3184	18.8122	17.8732	17.1148	17.9485	17.6964	16.1518	17.4983	16.0526	17.4095	17.2291	15.6362	17.3668	17.406	16.9161	16.3337	16.4962	16.677	16.8127	17.4402	16.3031	17.8565	17.2833	17.5609	17.2999	16.878	17.7511	16.9644	17.5589	17.4168	18.2927	17.3973	17.3353	16.9424
FAM160B1	16.5347	16.0914	16.6287	17.5314	15.8818	15.1048	16.0224	16.7169	16.5541	15.8245	15.8778	13.8135	17.6487	15.8835	15.0499	14.3733	16.0462	17.2482	16.5923	15.0555	14.9751	16.189	16.2975	15.6789	15.5233	16.2446	15.4852	17.0272	15.366	15.552	15.5082	15.7566	15.732	15.7051	16.0847	16.6223	15.2589	14.2345	15.0033	15.1254	14.8628	14.9341	14.3807	16.4908
FAM169A	12.6323	12.3212	16.8803	13.9963	15.4664	11.2094	12.9337	12.7793	13.4727	12.4593	13.8766	12.3177	14.2895	13.1604	13.7634	11.1172	13.8195	14.9252	11.4605	11.615	11.1737	13.4202	13.9205	11.435	11.8537	13.1773	12.479	14.4735	12.3779	12.1629	13.5028	13.3963	15.6544	12.0122	13.0258	12.2486	12.9883	14.0639	10.517	13.2036	15.4948	15.0033	13.416	13.7647
FAM32A	12.6857	12.586	14.6313	14.6571	12.8411	15.0841	12.8433	12.3936	11.874	13.2194	12.3464	15.484	14.0295	12.5034	13.7	11.0543	13.4426	13.2637	13.0525	11.7115	11.3412	12.4261	11.8681	13.7688	13.5132	12.0141	12.2219	12.6427	14.1972	12.8658	12.1412	12.4997	12.1251	13.1112	12.3864	13.3862	12.0932	11.4725	10.919	9.76419	12.7095	14.3325	13.8554	14.6471
FAM3C	17.4621	17.4296	17.286	18.3913	16.9888	16.8692	17.9997	16.72	18.1116	16.9887	16.3794	18.0975	17.0343	16.741	16.7014	16.3487	15.9375	16.6522	15.6718	17.0418	16.7992	16.74	16.635	16.0901	15.496	16.0995	16.5712	16.4052	15.981	16.7748	16.4441	17.2762	16.9314	15.9227	16.3418	16.5415	16.8798	16.5009	16.9537	17.7496	18.0747	17.2036	18.4189	16.6032
FDPS	18.4704	19.1843	19.3142	18.6604	18.7063	18.2216	17.1836	18.4005	18.0737	17.1956	18.6774	18.3082	18.8732	17.3854	18.0127	19.0459	18.5862	18.0199	17.5632	16.9253	18.367	18.0433	18.1551	17.5656	18.3882	18.1062	16.8695	17.7817	17.9745	17.6977	17.1621	17.5886	17.8196	17.5433	17.6039	17.2733	17.5885	18.2662	18.6385	18.4736	20.0207	18.9021	17.5914	18.3381
FES	15.5733	13.1412	15.2017	15.3094	13.8767	14.7601	14.8757	16.0119	16.0378	12.7437	11.8974	13.3777	15.3708	13.9234	13.4272	14.3665	14.1905	14.5035	13.8461	12.9667	14.1781	14.0186	12.9516	13.6159	12.0447	11.9009	14.0596	12.8591	11.8031	12.9037	15.1753	15.0364	16.1527	15.5731	15.8827	13.0604	13.7149	13.2326	14.0131	13.2347	11.6256	10.6515	11.6768	12.5462
FGD4	14.9496	15.3442	15.6295	17.7657	14.6263	15.1372	15.6207	14.4869	14.8595	15.098	14.5572	15.2126	15.6834	15.0702	14.4667	13.8214	14.3391	16.1163	14.8436	14.5665	13.878	14.3076	14.0012	13.8701	13.4976	13.7665	14.0888	14.11	14.7661	15.2408	14.9365	14.8083	15.5163	15.3343	14.9934	15.2787	14.7463	14.1699	14.4546	14.395	13.9466	14.3308	13.3408	15.009
FILIP1L	16.8068	14.5504	17.1831	18.2305	16.1875	16.4114	15.4534	16.1922	17.4311	15.554	16.0829	16.1317	16.6525	16.1921	15.237	15.6669	15.8815	16.4231	17.4819	14.0809	15.5037	17.7599	15.9004	16.019	15.4703	16.3979	16.2905	16.4	15.6342	16.1751	17.172	15.407	16.2501	16.5253	17.0135	15.739	14.8464	15.9266	14.8188	14.5621	15.1989	13.7583	15.0461	15.3766
FKBP2	19.006	19.6603	19.765	20.3408	16.4949	17.8873	19.3657	17.2149	19.3641	18.9296	19.2523	19.5732	20.6294	19.169	16.1983	19.9337	18.1631	20.3951	18.0511	17.8457	18.6977	18.4147	18.3083	18.9151	17.2838	18.0465	18.1711	17.9985	17.8879	18.2196	17.8444	19.193	18.1149	17.7357	18.5958	18.9678	18.5941	17.1629	18.5059	18.9261	16.0802	17.453	18.218	18.6502
FKBP5	17.2996	16.8954	18.2188	17.1333	17.106	17.2596	16.907	17.0153	16.676	16.9066	16.5321	17.6511	17.4876	16.7851	16.9279	16.3402	16.0727	17.2786	15.9946	16.7419	15.535	16.5748	15.9241	17.3228	16.7175	16.8129	16.5274	16.489	16.4977	15.7612	16.6104	17.3041	16.9906	17.2251	16.8328	17.5605	16.1255	16.0812	16.2506	15.4337	15.9225	15.9857	15.7986	17.8494
FMNL1	16.8001	17.3086	17.0933	17.1794	15.8911	14.5795	15.3979	15.4087	16.0619	15.8033	15.4529	15.1207	17.4577	15.8076	16.392	16.9336	15.5587	17.3788	15.5081	15.4187	16.1452	17.6181	15.8347	15.7063	15.488	15.1731	14.7701	16.5335	13.7037	15.2078	16.13	15.8938	15.2492	15.2954	16.193	16.1671	15.6326	13.722	15.371	14.8715	12.1924	11.4715	11.9271	13.0669
FNBP1	16.043	16.558	16.9836	16.3411	15.6476	15.9761	16.5374	16.0674	16.7873	16.6924	15.3678	17.2059	16.5153	16.0514	15.0259	16.0617	15.4456	15.5187	16.4501	15.4711	14.5836	16.6745	15.308	16.9916	14.4094	15.6067	15.3638	16.2083	15.3387	15.9983	17.4105	16.2716	16.7088	17.552	17.1249	18.111	15.5113	13.9541	15.6017	14.5465	14.8609	14.2154	14.1724	12.688
FNDC3A	15.8508	15.9923	17.0575	16.331	15.7765	15.9184	16.139	15.8594	16.5535	16.2178	16.3812	16.6048	16.8864	16.1268	15.6887	16.5267	16.0312	16.2995	14.9678	15.4622	15.2281	15.8378	15.4926	15.7465	16.7825	15.5338	15.6143	15.2559	15.0372	15.7834	16.3634	16.2488	16.5685	15.6482	15.9081	15.8108	15.652	15.3772	16.02	14.5391	15.4278	16.3919	16.0156	17.2482
FOXJ3	14.4869	12.9623	14.5311	13.5478	14.1418	14.3624	13.3224	13.3149	12.1102	12.9779	12.8328	13.5311	15.5085	14.7074	13.538	11.3288	14.2368	15.5629	14.2444	13.7377	13.0601	12.3726	13.3008	13.2562	11.9105	11.3745	12.0241	12.3688	11.4247	11.6701	14.628	11.7066	12.3875	12.787	12.1632	13.8531	13.1467	13.3194	13.283	13.1371	13.8682	13.8379	13.6626	13.6954
FTSJ3	17.6648	15.8969	18.5054	17.4385	18.0221	17.8454	14.9579	16.5696	16.052	15.8998	17.3275	17.6379	17.8749	17.2295	16.5649	17.1192	17.5943	19.0482	16.8058	16.0048	16.9953	16.558	17.5591	17.2197	16.7776	16.5798	17.2966	16.1964	15.8004	16.8282	16.5515	17.0528	16.3562	16.1273	15.5018	14.7444	17.2078	17.7119	15.9655	16.8973	18.2685	17.284	17.9094	17.9038
FYCO1	15.9628	16.2243	17.6284	17.4053	16.193	15.2723	16.7944	15.5239	15.896	16.2266	16.2705	16.8844	17.4936	16.6486	15.9507	15.405	15.3725	17.073	16.7954	16.2016	15.8506	17.2662	16.5407	16.0637	15.2515	15.6124	15.8706	16.7243	15.8372	15.5057	16.7084	16.4609	16.0981	16.6538	16.4802	16.9972	15.409	16.0712	15.4272	15.6708	16.1591	15.5435	14.7629	16.899
GCC2	15.8884	16.758	16.694	17.8254	15.7251	16.3877	15.8323	14.9437	15.7075	16.2083	16.07	16.6321	17.1966	15.9132	16.3539	15.5247	15.5718	15.4187	14.7882	15.4385	15.3715	14.8827	15.314	15.5261	15.8159	15.8443	15.7436	15.3026	16.5627	15.869	15.9389	16.206	15.8567	15.3819	15.7109	15.1518	15.6806	15.2024	15.605	15.2397	15.2268	15.9868	15.5702	16.3671
GCDH	17.6443	18.2286	18.2571	18.4295	17.6207	17.0397	18.1038	17.7374	17.9382	18.0462	17.7071	18.115	18.915	17.4905	16.1931	16.2873	16.2654	17.962	17.4249	17.4544	17.8683	17.6315	17.9436	17.5631	17.3549	16.7335	17.5148	17.7657	16.7436	15.9792	17.0681	17.6661	16.58	17.5726	16.5651	17.6418	16.9929	17.5744	17.2405	17.1087	18.1068	18.4677	18.4938	18.4444
GCSH	17.3102	18.3917	18.5361	18.8285	16.199	16.775	18.109	17.8338	18.12	17.6341	16.8834	19.2672	18.0565	17.1031	17.4454	17.7178	17.2597	21.0335	17.8835	15.9378	17.8673	17.3353	16.3689	16.6678	16.1842	17.2732	17.5305	17.7881	16.1323	17.1663	17.1747	17.1081	17.4025	17.2041	16.8699	17.2675	16.2355	17.0186	16.4322	17.9617	17.9906	17.4617	19.1276	14.1477
GDAP2	13.9837	17.0126	15.0398	16.2608	14.8897	15.5955	15.7452	15.1421	14.9308	15.6062	13.3148	16.934	15.8948	13.5937	14.2132	15.5031	15.4258	17.2677	14.4369	14.7984	15.6717	16.3747	15.3929	12.809	15.1702	12.6582	15.4991	15.4145	15.5265	11.2633	15.3348	15.597	15.6321	15.3078	15.1163	15.2922	14.8667	14.5307	14.484	15.1674	15.855	15.8261	15.8064	16.3491
GFER	13.3516	13.0414	13.5266	14.2179	14.2934	13.4922	15.7617	13.5216	14.2396	14.6895	13.8866	13.7297	13.8283	15.534	13.2932	13.8757	13.9893	12.8009	14.7118	14.0449	13.5497	13.1179	13.7106	13.8196	11.7614	13.3384	13.8031	14.0731	13.9477	12.5139	14.8212	13.8733	13.7355	14.3148	13.4165	12.6665	13.5785	13.4617	13.5101	14.1654	14.7679	13.7222	14.2144	15.0352
GIGYF2	15.9104	15.6412	16.5929	16.571	15.7566	15.3067	15.7476	15.7889	15.3754	15.4997	15.567	16.1308	16.291	14.9409	15.7173	14.9805	15.5146	16.9861	14.8448	14.4231	14.9995	15.33	15.6101	14.6101	15.5766	15.489	14.9768	15.5433	15.3664	14.8601	14.9743	14.6217	15.4654	13.9373	14.4048	14.7771	15.1586	15.245	14.9846	14.7603	15.3739	15.8798	15.9421	16.5151
GIMAP7	15.2529	13.039	18.554	16.5767	17.214	14.4712	15.3803	15.1779	15.849	15.1076	14.4483	14.2187	16.2231	15.3858	12.5132	15.0851	12.4245	12.8344	11.8438	14.8014	15.0756	12.1477	12.9936	15.8345	11.253	14.4332	15.7534	12.724	13.6132	12.5986	14.3156	15.0658	13.8763	15.3934	14.8489	15.0675	13.7691	13.4908	13.7234	10.3969	11.8144	12.0205	11.4871	13.5292
GINS3	14.4863	14.6478	16.0831	16.4447	15.5127	15.4278	13.3126	17.3174	12.2982	15.4333	15.2077	13.9716	14.24	13.6172	16.5253	14.8253	15.8119	16.5121	13.9423	14.0276	14.2905	13.2838	14.6839	12.6582	12.2423	15.4585	15.6621	13.149	13.8808	13.0593	14.5806	13.7903	15.3234	13.2156	12.1448	12.0808	13.6071	15.5361	13.7274	12.916	16.439	16.4915	15.6203	17.4563
GLCE	12.7019	16.8812	17.8989	16.5241	16.5688	16.7068	15.3568	15.9899	14.8787	16.8774	15.6467	16.0301	17.2124	14.9493	15.7953	14.7625	15.4756	16.9542	13.9253	14.8033	14.8777	12.2161	15.9313	13.4366	13.7396	14.2334	15.0714	12.0782	11.4169	13.7531	14.9112	14.9659	15.6047	12.8721	11.7948	13.4238	15.5715	15.743	15.4486	14.7921	16.6956	16.9835	15.0747	14.0462
GLE1	13.0275	12.9731	14.9518	14.2921	13.38	13.4491	13.4914	13.7239	14.1631	12.7838	11.8952	14.639	14.5224	12.2257	12.6743	12.1345	10.6397	12.7583	11.7764	12.3338	12.2306	12.5779	12.2365	12.6908	13.8448	13.5019	13.7971	13.3523	13.6526	12.8099	13.9252	13.3343	13.0343	14.5957	13.2697	12.5998	12.6068	13.4074	12.5646	12.1838	12.3338	14.2672	14.0729	14.2418
GLMN	16.7863	15.7543	15.9659	14.8943	15.5156	16.5724	16.2005	16.3595	16.0161	11.7284	16.3933	14.2207	16.5201	12.6907	11.7419	15.2945	15.6789	16.9358	15.5167	15.121	14.9762	15.8702	15.5791	12.1895	15.2242	16.3422	15.3782	12.7505	15.3664	11.6099	13.5168	14.6078	14.448	14.4649	13.6191	12.7528	15.5403	15.1862	14.9976	13.8601	16.0862	16.328	15.566	16.6092
GNAI1	17.3227	17.4669	17.8127	18.4232	16.0616	16.9998	17.9102	16.9419	18.3386	17.5603	17.42	18.1526	17.5256	17.454	16.6622	17.3688	16.2089	17.3015	17.1305	16.8241	15.9311	17.9791	16.8361	17.8324	16.4779	16.564	16.5306	17.1839	16.208	17.3197	16.9373	16.674	16.5144	17.1016	16.922	17.403	16.1778	16.0792	16.7893	16.2122	17.032	16.362	15.3441	16.3801
GNB1	18.65	19.2877	19.3311	20.7985	17.502	18.8874	19.5614	18.2264	19.2648	19.4423	18.1546	19.7483	19.2248	18.9258	18.0901	18.8058	18.4429	18.9347	19.1008	19.2388	18.1676	19.9444	19.0909	18.8202	18.4217	18.7224	18.5879	18.6863	17.6895	18.7932	19.4525	18.9576	19.1541	19.8847	19.2648	20.2832	18.2565	18.4628	18.5547	18.7277	18.2782	18.3554	16.951	17.1218
GNPDA2	18.4538	16.4902	16.8604	18.108	18.9032	15.8244	16.548	15.9649	16.0323	17.0204	16.2491	16.8755	15.6578	15.7336	12.7683	15.8595	16.035	16.5227	16.6016	14.9447	14.4994	17.0374	15.7667	17.1909	15.6276	15.5851	15.7234	16.8653	15.4992	16.755	17.0779	16.5704	16.5648	17.5527	16.8593	17.6609	15.069	14.4706	15.057	14.7248	16.5402	15.5137	15.203	17.0211
GOLGA3	17.5448	17.7195	18.0867	18.3058	17.1413	17.4414	17.5864	17.085	17.2813	17.7059	17.1856	18.4378	18.512	17.5656	17.0303	17.2618	17.2625	18.1892	17.1755	17.0639	16.5602	17.3861	17.131	17.5175	16.824	17.1264	16.908	17.2298	17.523	17.4988	17.589	17.7249	17.3247	17.5718	18.0426	17.9589	16.8365	16.5556	17.0546	16.9313	16.8893	16.447	16.4627	18.5786
GOLM1	18.1162	17.7932	18.4141	17.9081	18.0482	18.2297	18.7049	17.2535	17.3128	18.8673	17.3053	19.6884	19.9616	18.7041	18.6199	17.8539	17.2002	18.9397	16.6557	17.8071	17.4961	16.2916	16.8704	17.3684	17.1691	17.8264	17.6109	17.3626	15.8761	17.9755	16.9878	18.2359	16.8093	17.4184	16.5277	17.2467	17.344	16.7707	18.1123	17.7269	16.3216	16.033	16.9386	15.9853
GORAB	12.2326	15.8941	15.3746	15.3857	15.178	19.4317	12.3603	12.0956	12.4099	14.6636	14.5115	13.8259	15.2079	14.5938	11.2894	13.8783	13.7246	15.3338	11.1683	11.8915	9.71401	12.8612	13.2809	12.3794	12.4108	12.8301	14.3251	12.945	15.6777	12.2513	16.1711	14.0611	14.7968	12.494	14.635	13.2991	14.9994	11.3178	10.9395	10.7528	13.57	13.7185	14.6324	11.28
GPC4	16.0935	16.5136	15.8879	17.0449	15.676	14.9204	15.4334	14.586	15.3464	15.4921	15.4685	16.0172	15.9206	15.7271	15.5897	13.5286	14.4744	16.859	14.9412	14.4425	14.6047	15.7062	15.0742	17.5929	15.5752	15.2399	15.9257	15.4227	14.7512	14.9412	16.3214	14.818	15.9973	15.9168	15.0303	15.625	14.869	14.2308	14.1132	13.553	12.0644	13.1547	14.0548	14.7162
GPD2	17.5655	18.7772	17.8992	18.5363	17.6733	18.0063	18.5228	17.6571	18.0123	18.6252	18.0771	19.508	18.4106	18.3455	18.2521	18.2912	17.2592	18.7538	17.7107	17.7343	17.9267	17.07	17.5452	17.8897	17.7514	17.5302	17.6612	17.9958	15.669	17.9874	18.7292	18.5958	17.7555	18.0398	17.1818	17.6609	17.5479	17.8505	17.9502	19.2474	18.3713	16.9412	18.6925	15.4927
GPHN	16.1408	15.9801	16.5093	15.6078	16.6459	16.3246	16.4837	16.9448	15.9693	16.3534	16.2798	17.3027	16.2435	16.5665	15.3065	14.9037	15.1281	15.9791	15.3174	15.7564	15.0876	15.0806	15.4342	14.9053	15.3877	16.5849	15.8865	16.0727	16.1609	15.801	16.3153	16.9926	15.6315	16.5396	17.1594	16.7698	14.8514	16.6167	15.0121	15.4046	16.1147	16.4401	16.4529	16.125
GPKOW	16.7126	15.2748	17.0932	17.8974	16.309	15.6638	15.6046	15.7701	15.6949	15.6582	15.532	16.479	17.2078	16.0455	15.87	14.8329	14.8657	16.4379	13.7504	15.0255	14.788	15.0295	15.3669	11.5692	16.1765	14.9293	15.9469	16.3522	15.797	13.7344	15.9224	15.8773	15.613	16.8109	15.1994	15.5813	15.3496	14.8728	14.8206	15.158	14.6995	16.1324	15.4924	17.5483
GRIPAP1	15.1616	14.7197	16.5004	16.2949	15.2543	14.9437	15.4849	14.5601	14.7654	15.042	14.9405	15.8424	15.9289	15.2132	15.3743	14.7281	14.1082	15.4513	14.7526	14.6746	14.0357	14.9927	14.4418	15.4241	14.8268	14.8313	15.2402	14.9279	14.9518	15.5043	15.3381	15.3662	16.0673	15.8228	15.6676	16.2727	14.9369	14.3424	14.6355	14.3771	14.4742	14.8863	14.3118	16.3738
GSDMB	16.2445	16.9106	17.4064	18.3998	15.5897	16.5217	17.5416	17.9022	15.5229	16.9404	16.9784	18.0655	18.631	17.344	16.6675	16.915	17.8721	18.2907	16.3632	15.6242	14.957	12.1229	15.9607	12.6653	15.3041	18.4371	16.6943	16.7106	16.7123	16.6518	16.1741	17.8567	16.9442	15.8732	16.0988	15.4613	17.0248	15.3817	16.0507	17.8097	16.7186	14.9147	18.0209	16.6691
GSTT1	17.6416	17.7772	16.7932	18.7729	16.811	17.6535	17.8778	16.7925	16.5894	17.1056	18.028	17.859	17.899	17.3827	15.9803	12.1735	17.8427	16.2315	16.8745	16.5764	16.2754	16.7355	15.8227	18.1844	16.7223	16.7248	16.5395	17.4003	15.9015	16.3479	17.807	17.0707	16.4138	18.3355	17.4371	19.6714	16.9512	11.3845	11.5551	14.3572	11.4159	15.243	15.5498	15.8901
GTF3C3	16.8535	14.5853	17.175	15.444	16.051	15.6425	15.2664	14.445	14.4203	13.0809	14.8928	15.0432	16.6093	14.5998	15.7647	14.7698	15.0501	16.1143	14.2824	14.1716	14.9332	15.4162	14.485	13.0384	14.467	13.7942	15.0265	15.2182	13.61	13.7853	15.2956	12.9414	15.0562	15.5478	15.2957	15.4957	14.7769	15.0895	14.3406	14.2674	14.331	15.3638	15.3168	15.4122
HABP2	16.3059	18.2335	13.9147	14.8864	15.2634	17.8895	15.8624	17.4838	17.2429	17.5214	16.6941	17.2608	14.2949	17.2544	16.428	15.2016	14.5062	16.5714	15.7859	15.3374	14.1174	17.3911	16.8801	19.3037	17.5995	17.4572	17.8959	16.7372	17.1026	19.4795	16.133	17.1133	16.5556	16.8472	17.2269	19.2701	16.8782	15.0632	16.1043	13.4778	16.0975	11.5423	15.1757	18.5606
HACD2	15.5398	15.815	16.0371	15.2636	17.04	15.2781	16.1822	15.8804	15.7077	15.7522	15.9726	13.3569	15.1964	15.7272	15.5249	15.0961	14.8384	17.4725	13.7509	13.5132	14.6886	13.0866	14.2894	13.6124	15.3464	13.7996	13.4628	14.6541	13.343	14.7919	15.4098	15.747	15.1764	14.6425	14.4582	14.7256	14.4426	14.0111	14.5762	14.4056	15.9572	15.8576	15.5904	15.9292
HAPLN1	18.7995	17.2883	16.7112	20.6559	16.5906	12.3703	17.7221	15.5201	15.6369	18.8362	16.1464	19.5482	19.4408	17.7794	17.3872	17.2751	17.9741	20.4768	18.657	19.0575	16.4443	19.9577	17.5181	17.7683	10.7951	13.9376	15.7141	15.9739	11.4018	11.6107	16.5034	18.8793	16.953	16.9419	14.6058	18.4912	16.3623	14.1337	16.8481	14.4474	12.2094	12.7966	13.1163	13.3311
HAT1	16.1103	15.256	15.9501	17.3144	15.9871	15.055	15.8974	15.7283	15.6448	14.9305	15.906	16.5804	14.487	14.1923	15.2437	13.931	15.3029	18.0238	13.3063	14.211	14.4404	13.726	13.6368	15.7867	15.6865	16.1056	14.9272	15.7774	15.0141	15.6302	14.6269	15.694	15.9173	14.9681	14.699	13.9292	15.4074	13.8	14.3548	13.7267	16.5847	16.7965	14.9978	13.4068
HCLS1	17.6293	15.8722	16.1825	17.8877	15.3569	16.2945	16.4599	16.2889	16.5826	16.4271	16.7643	15.4114	17.4653	17.0352	13.8116	16.4104	16.0987	16.5964	16.071	14.8341	14.2343	15.4605	15.6263	16.6455	14.6695	15.6432	14.9366	15.7267	15.6788	16.4296	16.3864	16.0229	15.913	15.2651	15.6402	16.2166	15.9425	14.4734	15.363	16.0119	11.0571	10.7003	11.6519	12.6505
HDAC4	15.1839	14.1371	16.1533	14.4151	14.7586	15.6818	15.5131	15.4773	16.0807	14.8976	14.6153	13.3524	16.5047	14.8199	15.0796	13.1082	13.9246	13.5294	13.5403	13.1232	13.4649	15.0783	13.7006	15.5764	14.5521	14.4155	13.0586	16.6304	13.9536	14.84	14.135	14.6622	14.892	14.4052	15.1643	5.03996	12.9565	12.8559	12.4839	12.2222	14.9394	13.8825	13.9393	14.9839
HDDC3	16.2232	12.4156	14.4804	16.5777	15.3833	16.0365	16.1985	15.7114	14.9499	16.8831	16.0729	16.7706	15.4695	16.0616	14.0713	14.6008	14.6409	14.6018	13.592	14.8019	14.0869	11.3158	14.796	16.7129	15.3322	15.7147	16.2761	12.8172	15.6686	15.1192	15.5175	16.4744	15.3346	15.5842	14.8953	15.869	14.8304	15.3958	15.0681	14.1896	14.6567	14.6605	13.7606	16.9135
HDLBP	17.2154	17.3809	17.2209	17.5851	16.8189	16.7882	17.1836	16.9683	17.1269	17.4109	17.2739	17.366	18.2949	17.0349	16.6802	17.2028	16.3121	16.4688	15.9548	16.2523	16.5175	16.7329	16.0496	16.5596	16.4588	17.0916	16.5331	16.7803	17.0415	16.6899	16.0035	16.9088	16.6588	15.9577	16.2575	16.283	16.524	16.3609	16.5689	16.0987	15.8084	15.7613	15.351	17.1926
HEATR6	12.6698	12.5321	15.4769	14.4789	13.3731	11.3627	11.8273	12.1348	12.4274	13.3151	13.289	14.9341	15.6182	13.134	11.4456	13.0744	11.3606	11.9522	9.97268	9.48147	11.378	12.5225	15.0496	12.6531	12.7179	12.5931	12.7058	12.342	11.8567	11.8375	12.1806	12.1646	11.765	12.013	11.5949	10.6447	14.7204	12.2427	11.8851	10.5287	11.3306	12.9183	12.4267	13.3369
HELLS	14.4841	14.0514	14.9561	16.4494	14.6515	13.4356	14.858	14.199	14.2025	13.7702	14.7801	13.1497	13.2018	12.4289	15.2916	13.9011	12.7073	17.274	11.6105	13.7133	12.5107	12.308	13.4517	13.5249	13.8379	14.5664	12.4217	14.055	11.3314	13.326	12.2585	12.5943	14.6763	12.6743	13.6135	13.0474	12.6819	13.7029	14.0654	9.89676	13.2443	15.4414	13.615	12.3072
HERC4	15.507	15.4339	16.5793	17.3179	15.4432	14.7805	14.8041	14.7606	14.5544	14.5276	15.2552	15.4628	15.6596	15.1986	14.6711	14.6768	14.759	12.9054	14.3984	14.343	14.3157	14.4805	14.1482	14.3312	14.7633	14.6383	14.4997	15.334	14.9989	14.1363	14.851	15.0263	14.8502	14.9275	14.8711	15.3465	14.8264	14.0214	14.1007	14.2619	15.1544	14.1477	14.3171	15.2077
HLA-DRB5	18.1473	17.0558	16.0315	14.2494	17.4752	15.4215	13.2197	18.7308	17.7886	18.8348	15.456	14.4275	18.2371	16.6147	15.4728	17.6873	15.7183	17.7855	15.5565	16.9187	15.6104	11.921	16.3555	18.5299	14.8636	15.985	14.6037	16.415	14.4448	11.577	12.2009	16.9128	16.4057	15.4775	16.9663	18.8378	17.981	16.3661	16.9209	15.9883	13.6954	12.0331	11.2467	13.0227
HMGA2	12.648	13.4486	18.212	13.7773	15.858	14.43	13.3405	13.4406	11.6465	13.3968	13.8189	13.5368	13.6312	13.2636	13.8533	12.8337	12.106	13.5362	14.7945	10.828	14.0717	12.8158	12.8217	13.5927	12.8873	12.0255	12.8772	13.4078	12.8449	12.9112	14.8266	13.2259	16.4236	13.599	13.2457	12.7648	12.042	13.0817	11.5608	11.7279	13.9426	12.6783	12.9622	14.4897
HMGN1	18.7786	17.3482	17.1664	19.4631	19.8124	15.5915	17.4607	16.3413	16.6919	16.6075	18.0777	15.5094	18.5854	18.535	17.2915	17.1039	17.1139	18.3434	17.0168	16.3686	15.9079	17.0439	16.8223	16.9108	15.475	15.8923	16.2177	17.0559	16.3472	15.7268	16.0141	15.5601	16.5845	16.9134	16.836	17.0403	15.7897	15.9116	16.3633	15.937	18.2656	17.1586	16.3053	16.1298
HMGN5	15.3784	16.318	14.7155	16.9739	16.1353	15.4711	16.5027	15.3648	14.9124	16.1376	15.9807	16.2612	16.6234	15.8199	14.8871	13.039	15.9672	17.4985	14.5172	15.6346	14.1388	15.2215	14.982	17.4738	15.825	16.9634	16.1238	16.1468	15.0362	14.1367	14.7535	16.2851	14.5408	15.8473	15.5563	16.3342	14.5415	15.1538	15.3335	13.1756	14.5338	16.3681	15.1843	15.7046
HMOX1	17.4455	16.2925	18.0742	18.2268	17.7174	16.4016	16.0003	16.5617	18.2837	16.6772	15.8656	16.9381	17.5917	16.6694	14.66	17.8934	17.2655	16.5968	14.8529	16.9532	17.2864	19.0447	16.496	17.497	14.8751	16.4017	16.4596	16.1372	15.1645	15.4617	17.161	16.6883	17.1869	17.0686	18.1917	16.8211	16.2218	14.9598	17.2679	16.4274	14.4051	12.8418	15.0608	13.1648
HOOK1	15.7494	15.0055	15.6843	16.5646	15.3838	15.869	16.0203	15.4191	15.2971	15.2393	15.4847	16.3394	16.7276	15.4173	15.6628	14.6246	15.2506	16.6138	13.9269	14.667	14.378	10.6905	14.6608	14.5237	15.1151	15.2962	14.764	15.3379	14.7504	15.6577	13.9297	15.0216	14.6786	13.8787	13.7426	14.9717	14.536	14.8978	14.6863	14.739	15.1596	14.4612	14.9954	16.2043
HSCB	16.1068	16.8851	16.5102	17.1195	15.7977	16.4121	17.086	15.6831	16.761	16.5813	16.3867	15.1824	16.0239	16.035	15.9479	16.1003	14.1075	17.9812	15.3242	15.4203	14.6923	14.8166	15.0591	16.7466	15.5136	15.9317	15.9052	15.4794	14.0609	14.8073	16.0051	16.2378	15.0249	17.2358	15.4864	16.2541	15.0387	15.6914	14.9156	13.9192	16.142	15.9033	15.4035	13.5707
HSPA5	22.0115	21.8797	22.3812	21.9347	21.4081	21.649	22.1089	21.5951	22.4522	21.7604	22.1004	21.8912	22.6053	21.9828	21.5858	22.4649	20.6881	22.4034	20.4816	21.1101	21.2263	21.6537	20.8513	21.97	21.3104	21.6329	21.3648	21.4595	22.1733	21.8324	21.3501	21.6397	21.4488	20.9084	21.4264	21.2646	21.5739	21.1092	21.7177	20.8384	21.0948	22.4932	21.5867	22.1448
HTT	14.4353	14.9186	15.4715	15.582	14.6566	14.0732	14.0463	14.4561	14.093	14.0435	14.4014	15.1808	15.1012	14.0103	13.1356	13.5441	12.8683	14.367	12.736	14.1113	13.6017	15.0158	13.7217	13.7114	13.8958	14.0379	13.967	13.9869	13.4156	14.228	13.1977	14.5581	14.3821	14.5807	14.1146	15.0697	13.5827	13.6411	14.1425	13.5463	14.2373	14.173	14.4554	14.5375
IFI35	17.3028	16.5612	17.2664	17.3062	16.9946	16.668	15.881	16.4927	14.9774	16.0758	16.2932	17.3164	18.2319	16.0237	15.0202	17.6005	16.7473	18.2553	16.4781	16.2523	16.3803	16.6876	16.2112	16.133	15.2464	16.4611	15.8018	16.044	16.0214	15.2526	16.0606	15.8952	15.5837	16.2201	16.875	16.6851	16.5344	16.4839	16.9079	16.5304	15.9093	14.8903	15.8802	16.7136
IFRD2	14.3664	13.3584	16.0037	15.3937	15.9992	15.5868	15.2202	15.7056	15.1858	15.2075	14.3093	17.0526	16.6856	15.4258	15.0141	15.9284	15.5695	18.5872	15.4376	13.0596	13.7924	14.771	14.3642	13.3708	15.5376	15.0175	15.2387	14.9816	14.5235	11.3099	14.0084	14.9166	13.4633	14.9984	14.9625	14.8649	14.0329	14.2987	13.6643	14.1483	14.4209	15.2094	14.8149	12.8277
INPP1	15.5309	16.739	16.0205	16.8083	15.9	16.1598	15.5974	14.8355	15.4993	16.5832	15.7877	17.6195	17.3737	16.1626	14.2259	14.8184	15.7978	17.1024	15.6818	15.1715	15.2758	15.9946	15.2599	16.6985	15.3272	16.2007	14.8703	16.5522	16.2165	15.9231	15.2568	15.7316	15.1076	16.5672	15.5066	15.9805	15.1446	13.2899	15.2348	15.3322	16.3251	15.6504	15.7157	16.4901
INTS12	14.2981	14.9554	15.3151	14.5313	15.5035	13.9196	14.9178	14.3584	13.6738	14.296	13.5876	13.3492	15.5389	14.596	13.9446	13.5321	14.1229	14.7037	14.5474	13.5447	13.6869	14.1255	14.7088	12.9348	14.5125	13.7181	14.2891	13.3375	14.2247	14.4956	14.9414	14.6428	15.3689	14.6151	14.3072	13.9856	13.6288	14.2733	13.5076	12.9223	14.1632	15.1537	15.4889	14.3056
IQGAP1	20.223	19.7137	20.2032	20.8785	20.4101	19.8654	20.3359	19.8804	20.0887	20.0668	20.2769	20.5181	20.6972	20.4286	19.2091	20.12	20.4364	20.9591	20.0521	19.7021	19.6951	20.6632	19.4498	20.202	19.7357	19.9364	19.6014	19.9518	20.0465	19.9872	20.0124	20.3747	20.0676	20.0889	20.0319	20.3752	19.5692	19.3773	19.7274	19.5505	20.0344	19.0292	18.1311	19.9199
IRF3	15.7892	16.9158	17.3071	16.1161	16.1554	16.2593	16.4411	16.6214	16.6224	15.7667	15.5826	14.7277	17.2608	15.5841	15.6503	15.7836	14.9827	17.3839	11.6133	15.0586	14.9319	16.1843	15.5074	14.9092	14.7591	15.4906	14.5916	16.3711	15.2436	14.8209	12.2491	16.4202	16.968	11.7934	13.3612	13.4763	15.2035	13.2007	14.0858	14.5105	15.6981	14.9305	12.8241	15.7948
IRF6	15.8437	16.2395	20.4207	16.2212	16.2286	16.3304	15.5454	14.8864	14.3975	15.7649	15.8547	17.1566	16.4608	16.2039	16.4164	14.4891	15.5108	16.0533	15.2752	15.6549	15.1512	12.9506	15.0582	13.2195	15.7887	15.9731	15.3541	12.4008	16.3439	14.7954	14.3126	15.3034	15.634	15.1863	14.9864	15.1547	15.8645	14.8511	15.4059	16.1254	15.2009	15.6633	15.6212	16.5695
ISCA2	16.2573	15.5842	16.3023	15.973	15.2744	15.9719	16.3543	15.5838	15.0638	16.2342	16.0568	17.4107	15.6499	16.6484	16.005	13.2961	13.0542	14.3002	13.8127	14.9522	15.0738	15.7141	13.4218	15.9802	14.527	15.3301	15.691	15.7237	15.5853	15.4623	12.4761	15.1565	12.4803	16.4304	14.7409	13.0791	14.7024	15.94	14.4377	14.5619	15.2017	16.137	15.209	17.4217
ISG20	17.8243	15.5437	17.6531	17.5341	16.2542	15.7829	14.8372	15.678	15.1263	16.0395	18.1437	17.4233	18.6911	17.3559	12.8924	17.5885	15.373	16.9328	15.0936	16.9298	15.4445	16.694	14.6297	16.7022	14.5659	16.3105	16.3419	11.9844	15.627	14.405	14.3695	16.1145	13.8147	14.6367	15.8275	15.2719	17.5042	15.1591	17.3246	16.3342	15.4942	13.3504	13.2268	15.0883
ITGA1	18.532	18.0258	19.6245	19.9295	18.369	17.8239	18.927	18.7935	20.3615	18.6347	18.0246	19.3793	18.8252	18.4555	17.9003	18.4309	17.2063	19.2424	18.9967	18.2531	17.9463	19.4947	17.3192	18.0803	17.6007	17.8651	18.2242	19.5624	16.6236	17.0283	19.8838	18.4701	19.2857	19.35	18.974	19.5078	16.3232	17.5137	18.5555	16.4937	15.368	12.211	14.4382	17.045
ITGA5	17.0829	15.0244	18.7529	18.7235	16.8289	16.5153	17.1665	17.1287	17.7457	17.2678	16.0618	18.5255	17.4246	16.8823	15.9648	18.2252	17.414	18.6035	19.188	17.8934	17.9662	20.7059	17.4219	16.9552	15.1202	17.3001	17.942	19.3308	15.4141	17.0319	19.7992	16.8954	17.5074	18.958	18.3061	20.6134	15.9352	16.7885	17.6663	16.5706	11.9452	10.6989	12.9364	13.0619
ITGB4	16.6832	17.416	18.1844	17.4207	17.6359	17.3579	17.4135	16.75	15.9145	17.3665	17.6332	17.7109	18.112	17.2108	17.0288	17.6864	16.8609	18.3616	16.2018	16.7361	17.2083	15.2226	16.8437	15.0335	17.0675	17.3737	16.719	17.4601	16.2991	16.0788	17.0312	17.0939	16.5354	16.8187	16.7992	16.5839	17.3274	17.8155	17.1581	17.2205	18.1988	17.5658	16.9267	17.204
ITGB5	16.0045	15.559	16.2744	17.2001	15.749	15.9655	16.3008	16.1156	16.285	15.8515	15.4081	16.1735	15.4564	15.5658	15.4828	14.6896	14.3423	15.7236	16.207	14.8226	15.1852	16.6872	14.3818	15.4035	14.7934	15.569	15.2722	16.1212	14.9925	15.9449	15.7308	15.1999	16.8729	15.5378	15.2297	15.5404	13.6957	14.9059	15.1067	15.3889	14.6332	15.3662	14.8812	16.3068
ITIH5	14.8419	16.9339	15.9981	16.3177	14.4163	13.6443	17.2109	14.6217	16.1162	16.0481	16.7382	13.0983	14.9451	15.0862	12.1349	14.4074	14.6882	13.8765	16.7207	15.526	14.0458	15.0963	14.4246	15.866	14.9696	15.5507	15.5338	17.3092	14.2666	16.3129	15.4051	15.7919	15.9129	16.1491	16.3745	15.7003	13.8692	14.0617	14.8743	14.1166	14.5035	13.67	15.2626	14.8259
IWS1	16.7318	15.9097	17.4754	17.8405	16.3651	16.1461	16.7977	15.7817	16.2783	16.5925	16.1158	16.0555	18.0487	16.0119	16.2794	15.6667	16.2429	18.6652	15.4001	15.6231	16.1887	16.6834	16.1464	17.3605	16.6923	15.6889	14.8329	15.0683	16.1121	16.2238	17.3686	16.4114	16.6505	16.4083	16.605	16.987	15.5757	15.8954	15.0785	14.7672	16.3576	17.1198	16.1692	17.6997
JPT1	15.1131	14.0693	17.8654	14.6422	15.1014	17.2028	14.8297	16.3745	13.901	13.9428	14.8121	14.5213	14.516	13.3095	15.2896	15.819	17.0434	15.5941	15.3953	12.0921	11.5212	12.6767	14.4349	12.3545	14.8953	13.6489	13.1207	13.3403	14.1097	12.4038	14.7612	12.9204	16.2638	12.3789	13.6439	12.776	15.2203	15.1712	10.0697	14.5479	18.1389	14.8978	16.6646	18.8244
JTB	14.9855	16.466	15.0464	14.4982	13.5885	14.5845	15.98	14.3516	16.0492	16.5275	14.689	16.3968	15.1067	15.3523	15.6701	12.2285	11.8097	12.7934	10.7045	11.0429	15.4199	15.3191	12.6138	12.3004	14.6521	14.595	14.9595	11.3012	15.4153	13.0942	15.0385	16.3031	14.5932	12.6319	13.4724	11.7577	13.0367	13.6246	10.6688	15.4702	9.41165	13.1292	15.8661	14.5805
JUNB	13.692	12.5719	13.3305	15.2277	13.8847	16.1618	15.4898	14.6608	14.5665	13.9441	12.7542	13.0473	15.5867	13.2848	12.2021	13.2047	14.1085	16.1147	11.7831	10.213	11.8612	12.1189	12.9999	12.4731	14.4145	13.3312	13.6086	11.9622	14.1844	14.2465	15.7039	11.8507	16.373	13.2235	12.1228	12.3702	11.537	12.064	11.5245	12.6755	13.1495	14.1539	13.7099	15.627
KCMF1	13.6892	16.2495	14.4007	15.0733	15.0002	14.8424	11.8616	14.1419	15.388	16.2238	15.4166	15.3939	15.4379	14.5053	14.4851	14.6787	14.6647	16.0466	14.6317	13.1765	13.6655	14.1908	13.8945	13.9847	15.129	14.871	14.8049	14.3618	15.1132	14.6844	14.1726	15.9388	13.0577	14.6772	14.779	14.9475	14.0837	14.0648	14.0587	14.1806	15.5511	14.1486	14.8824	17.1876
KCTD18	13.452	14.1712	12.7359	14.0805	11.3008	11.1154	12.4577	13.5228	12.78	12.4839	13.0208	13.6265	13.8791	12.4703	11.5862	14.431	12.931	16.0547	11.4177	12.1711	11.7231	12.7186	12.8051	12.5868	11.2988	12.8754	12.4694	13.1463	13.0625	13.4856	13.2757	13.986	13.2949	12.505	12.179	12.3705	12.1355	11.6436	11.2773	11.1908	13.3517	14.1104	12.6247	14.3389
KDM2A	15.1388	13.3341	16.0612	16.8161	14.9282	15.2971	15.0965	15.1286	15.5802	14.1321	14.6681	12.5821	15.4256	14.7182	15.5516	14.6596	15.1616	16.1736	14.9583	13.7595	14.662	14.4002	14.8817	14.5555	14.5	15.3117	14.6942	14.6695	14.9928	14.4409	13.3031	13.9352	14.8836	13.328	12.7655	15.2644	14.3325	14.3347	13.8927	14.531	15.2592	15.7689	16.0708	15.2867
KIAA0319L	14.9268	14.7946	16.0754	15.597	14.2287	15.02	15.4655	14.6598	15.0423	15.7285	15.4188	16.003	16.5691	15.3901	15.2448	14.5315	13.4079	16.2874	14.8631	14.1023	14.1734	13.5824	14.4377	15.3573	15.5484	14.8808	14.948	15.1046	14.5523	15.3619	13.7869	15.282	14.2407	14.057	13.7693	13.2115	13.8198	14.6689	14.1271	14.8993	14.8997	13.2607	15.0162	14.8796
KIF13B	17.3019	16.9726	17.6012	17.9322	17.5409	17.9674	18.1747	16.7728	16.9203	17.9658	17.4278	18.5715	18.367	17.8797	16.7902	17.9935	17.5877	17.5634	17.1958	17.4826	17.2512	16.5175	17.3981	17.3192	16.9279	17.4736	17.3601	16.9064	17.543	16.5842	17.2546	18.0665	17.3571	17.8098	17.3802	17.2213	17.3204	16.8406	17.5749	17.292	17.2261	16.534	16.5162	17.4057
KIF15	18.5222	20.5397	19.0114	20.4502	18.2892	19.536	12.717	17.0044	12.46	13.8356	18.0394	13.7304	18.3842	13.188	18.3433	18.251	18.1505	18.617	21.5818	11.4716	16.7428	19.0897	17.1813	12.1651	18.2995	16.711	15.228	12.9148	18.2161	12.8125	17.6013	15.4777	16.5485	16.3035	12.5861	13.9113	16.8214	17.931	11.1854	18.4252	17.6813	16.7267	15.3791	19.295
KIF21B	14.3172	13.9816	17.578	15.0084	13.8642	13.9148	14.098	15.1135	16.8656	13.4503	12.5986	15.6802	14.5892	13.2694	13.8167	12.0612	11.8019	14.5547	11.7676	11.4158	12.8139	14.7009	15.2301	13.6854	12.0742	11.5795	13.0586	12.5234	12.1192	13.6948	12.3912	11.795	13.0181	12.8793	11.8568	12.4718	13.1918	10.1253	13.1376	13.474	10.9813	11.3736	12.1112	12.7542
L2HGDH	17.0819	16.7587	16.8075	18.7159	16.4085	15.9588	16.1102	16.437	15.8001	16.0747	16.3509	16.9858	16.8278	16.9149	16.704	13.6437	13.9662	15.4563	15.6024	15.5284	15.9291	12.2983	15.0193	16.1335	15.6587	15.6731	16.9311	15.9233	15.8942	16.6932	16.2529	15.8049	15.7189	15.8891	16.2027	15.8425	14.9315	16.4851	15.0118	16.3524	15.2617	16.9113	16.7381	16.4014
LAMA2	15.8398	15.5888	16.9695	17.7167	14.6949	15.5583	16.9186	15.5332	15.4719	16.4673	14.3058	17.1656	17.5497	16.8753	14.8055	14.6588	14.2354	16.5064	16.134	15.5012	14.4822	17.0804	13.6635	16.0058	13.9868	15.0893	15.0196	16.6365	10.3973	15.5228	16.6652	16.8425	15.3883	16.8517	16.3435	17.345	13.9145	14.4097	15.9056	12.7861	12.4428	14.874	14.1375	16.8444
LAMA3	16.0952	15.8376	17.8117	18.1968	17.5769	16.3237	16.0113	16.0425	15.4724	16.0985	16.7989	16.8136	17.8851	16.1024	15.497	17.5561	15.8267	17.9394	17.3517	14.7956	15.9846	15.8856	16.2745	16.1534	15.7501	14.3995	15.8	15.3134	14.9716	16.8704	15.7987	15.6725	16.254	15.5995	16.4401	15.4514	14.7251	15.8609	15.7125	15.4649	15.3418	14.4412	13.6714	15.3173
LAMA5	16.5506	13.1422	19.9968	18.3878	16.2305	15.4981	16.0471	15.6256	16.1628	16.6509	15.8932	16.8711	18.3404	17.112	15.6752	17.7501	16.1928	16.9655	19.012	17.2727	16.7921	18.7266	17.3869	15.483	14.7799	15.5847	16.0609	16.4715	15.1014	15.5281	17.8602	16.6406	16.8624	18.1191	17.5459	18.7373	15.6004	16.2141	17.1037	16.063	14.9766	15.3002	13.5793	17.0418
LAMTOR5	14.9949	15.7107	14.3277	16.0076	14.6907	14.3805	16.1657	15.1908	15.0667	15.1108	14.6798	15.9477	17.272	14.8497	13.2173	14.8566	14.1916	17.6445	15.2394	14.9369	13.9226	16.4272	15.1519	16.0032	14.1417	14.2321	14.274	15.4316	13.7086	14.6677	14.9087	15.1694	14.8779	14.9194	14.6273	15.0902	14.468	14.8652	14.4914	15.3327	15.0542	15.4752	15.3613	14.4548
LARP4B	12.7147	12.9086	14.2608	14.1069	13.5077	12.0508	13.0749	13.0438	12.2268	13.085	12.3784	13.6797	13.5643	12.7056	13.4911	12.5142	13.5369	13.6505	11.8543	11.5115	10.1557	11.9407	10.95	12.9168	11.3266	12.7164	12.8851	13.114	13.1104	12.9485	12.6838	11.4711	12.5259	13.4352	12.1755	12.8964	13.6671	14.1884	12.0889	11.5693	14.7811	13.5564	14.0466	13.2941
LCMT1	16.1981	15.6798	13.7211	13.8413	14.5378	14.9296	14.9344	14.8293	13.7596	15.127	14.403	13.3918	14.7416	14.6413	14.5705	15.4244	15.3714	15.8457	15.9267	14.6118	14.9501	15.6807	15.0768	14.6653	15.3354	15.4767	15.0901	15.8517	15.3874	15.0561	14.8861	14.7957	14.5619	15.0197	15.1741	15.5459	13.2108	14.7013	14.4742	14.1451	14.8618	14.9085	13.8762	16.6712
LCP1	20.2309	18.0935	19.8546	20.0663	18.9616	18.3983	18.6601	18.9964	19.2915	19.2652	19.2173	19.6074	20.6418	19.5756	18.1064	19.8555	19.1311	18.8277	19.4461	19.129	18.7284	19.7783	19.3683	19.9625	16.8101	18.5118	18.2581	18.612	17.7032	18.9538	18.6676	18.5784	18.3572	18.4347	19.092	19.3315	19.0734	17.7752	19.2702	18.9009	16.6668	17.4627	16.899	19.2389
LDB1	11.9799	12.9148	14.3164	13.5676	13.5646	12.6775	13.758	12.761	13.3184	13.7372	12.7767	14.6205	13.635	13.5325	12.4566	13.0515	13.7117	12.8399	13.7988	13.8004	13.3788	14.8596	14.2227	13.391	16.3328	12.7324	13.3865	14.0579	12.4249	12.9792	13.7825	12.4103	14.226	13.3439	12.6044	14.9109	13.614	13.3421	13.4256	13.3172	12.9025	13.4205	12.0427	12.6044
LGALS9	18.0119	16.804	18.7868	16.9099	18.1341	17.8015	14.2354	17.2237	15.0388	17.6614	18.6968	18.6944	19.7686	16.8316	16.8526	18.0249	17.4363	16.3574	16.6491	17.5107	16.4137	15.6835	17.6968	16.3415	17.0699	17.4459	15.6077	14.8934	16.0291	15.3193	17.1801	17.6399	17.4933	17.4977	17.4367	17.105	18.1238	17.8928	18.3372	16.3031	16.8599	15.2333	12.5739	13.073
LIMD2	14.5212	13.6775	16.8874	14.1141	14.2453	7.30045	12.1172	15.6887	15.4938	15.1483	14.0164	14.5457	13.5857	14.3776	12.4459	14.4759	14.0173	12.7559	7.01549	14.238	14.1597	17.7608	10.8363	13.0338	12.6573	14.3382	13.8301	12.5128	2.11563	15.1936	12.8549	12.7439	13.969	17.045	11.4294	12.2375	13.1795	14.4663	15.9634	13.7827	11.3397	11.6245	12.238	12.8225
LIN7C	17.4288	17.2168	18.8742	18.6007	16.8209	16.5283	17.7488	16.4884	16.5805	17.7943	18.4432	17.4754	19.1342	17.5391	17.1942	16.5641	15.6573	18.2752	16.4791	16.0862	16.3698	16.518	16.9176	17.7067	16.5308	16.9444	17.0965	17.4282	17.2354	17.806	16.1076	16.6333	16.8358	16.6833	16.6301	16.0263	16.7325	16.0238	16.5779	16.5742	16.18	15.3385	16.921	18.2368
LPXN	16.6656	15.4758	17.2197	16.889	16.9725	14.793	16.6771	15.9759	16.9154	16.6727	16.4027	17.3772	17.4213	16.2336	14.3605	17.7361	16.6712	16.3111	16.642	16.1336	16.6595	17.6483	16.308	16.7721	14.7896	16.177	15.7332	17.4283	15.316	15.6618	16.5813	16.3273	17.4605	16.322	16.6289	15.757	16.5192	14.8908	16.8171	16.4594	17.681	11.5842	12.1958	13.2078
LRRC40	16.4137	16.4488	16.8649	17.1931	15.6182	16.5976	15.6986	15.961	15.83	16.4339	16.284	17.0456	17.356	15.9105	14.7727	16.263	16.4027	17.2402	16.6708	15.5249	15.3405	16.0869	15.8012	16.0054	16.0608	16.4297	16.2578	16.3673	15.8926	15.3788	16.2473	15.5551	16.053	16.7302	16.2013	16.9002	15.1371	15.5497	15.476	15.2492	16.1183	16.3443	15.6548	17.2352
LSM5	17.54	17.8543	19.0053	19.6345	18.7443	17.8393	18.9096	17.8955	17.9438	18.6443	17.5607	18.9783	19.104	17.5407	18.5321	18.7525	17.1193	18.5938	17.6066	16.888	17.9295	17.2528	15.6418	17.5117	17.4464	17.5923	17.5113	18.4375	17.6603	17.6573	17.3292	17.7332	16.9228	16.6936	17.3616	17.3249	16.6067	17.4649	17.6044	17.5789	18.0698	17.664	18.7535	17.3717
LTN1	15.4216	14.6881	14.5531	17.4254	14.8755	13.7433	15.0336	13.6887	15.1614	14.4348	15.5093	14.7568	15.7786	14.4878	14.9784	13.4022	13.9632	14.5096	13.7016	13.6346	14.0094	15.2644	14.4578	14.0655	14.9797	15.2115	14.2652	14.8479	14.864	14.8962	13.3692	14.1273	14.1754	14.8145	13.9658	14.5674	13.5255	14.0293	13.8203	13.2454	14.0913	14.0022	14.6016	15.581
LUC7L	17.2835	16.5397	18.1683	18.3255	17.256	17.042	15.9359	16.7373	16.5508	16.1126	17.057	16.6581	17.7927	16.6195	16.6198	16.9506	17.1764	17.2954	17.001	15.6596	16.8228	17.0585	17.013	16.6072	16.3156	16.7687	16.8662	16.4378	16.1236	16.5726	15.9129	15.476	16.7469	15.9183	15.9323	15.9331	16.3123	16.9311	15.912	16.1617	17.8622	17.2927	16.3561	16.4728
MAN2B1	15.775	17.0348	17.1496	15.7648	15.5624	15.8325	16.1887	15.0809	16.3765	16.4718	15.4882	16.7959	15.0662	15.6642	14.6375	16.9096	15.4879	14.8021	15.3961	16.0215	15.0548	15.537	14.686	16.439	15.2918	15.4713	14.8856	16.0573	15.8022	15.7325	15.6325	15.7602	15.3841	15.756	15.8086	16.1146	15.6477	14.3267	16.0394	14.7639	17.6071	15.7419	16.1394	15.4636
MAPK14	17.6459	17.4083	18.3376	18.7181	17.6417	16.8215	17.0414	17.0434	17.1547	16.9382	16.9047	17.2929	18.6949	17.1891	17.4409	17.2796	17.0602	17.556	17.5765	16.295	16.8904	18.0751	16.9579	17.9119	16.7883	16.7322	16.7343	16.2415	16.7547	17.7558	16.5195	16.55	16.8464	17.0338	17.0623	16.8496	16.6166	16.0969	16.4754	16.5123	16.9925	16.4677	16.7314	16.4739
MATN2	16.3449	17.7856	17.9177	18.4601	14.6915	17.2951	17.6892	10.2214	16.8572	17.8248	16.7488	16.9637	16.6743	17.6409	8.76067	15.1409	15.5862	15.9696	17.4646	16.0564	15.5687	17.1613	16.6503	15.0847	12.456	15.1771	16.6847	17.6165	16.6443	16.1725	17.6704	17.1928	17.2233	17.5579	17.6441	18.5227	14.8075	14.6434	16.6278	13.4765	15.1077	10.9576	10.6672	13.1772
MBD2	16.4499	15.6953	16.3861	15.6052	16.1283	15.748	15.3092	14.9321	15.1292	16.3045	15.8095	16.1098	15.8233	16.0802	16.0055	13.5915	14.2819	14.7847	13.0714	14.0607	14.9524	15.0845	14.2934	14.8819	15.3755	14.4339	13.8639	15.739	15.7364	15.1559	14.6995	13.5917	14.8385	13.2724	14.6688	13.4475	14.8333	14.5774	13.9425	13.8196	15.0032	15.6296	13.5545	16.2561
MBD3	14.6427	14.777	16.0903	14.4665	14.6439	13.5588	11.8277	13.0002	14.3078	13.961	14.532	14.1776	12.7657	14.7678	12.8041	14.404	14.2105	14.6593	13.0121	11.2139	12.8139	11.8833	12.847	13.1068	13.8947	11.5584	12.7166	12.1722	13.3798	13.0108	13.5942	13.7065	13.8456	13.8248	12.6869	14.0989	12.8514	13.0961	10.7464	11.3811	15.0101	14.5513	13.6928	14.9475
MCAM	16.0812	14.6958	17.308	18.2214	15.2471	15.2876	16.0719	15.4512	17.2038	15.9637	15.8038	16.2393	16.6052	16.4268	14.6355	15.9616	15.422	14.674	16.7979	15.6782	15.2674	16.9246	14.6793	14.8923	15.1107	15.8053	15.6955	17.3426	14.597	15.5667	17.6269	15.8449	16.1311	17.6503	17.3398	18.4348	14.4672	14.9331	15.7896	14.2861	12.4272	15.5555	11.4363	11.7405
ME3	16.5375	15.4495	15.6616	18.1343	15.5978	15.4439	16.2038	16.2524	16.1721	16.1478	16.784	16.8378	14.981	16.503	14.4772	14.0541	13.0389	13.05	16.0134	15.7077	15.695	15.6476	15.9848	15.7321	16.0254	15.9662	15.8672	17.064	15.8951	16.3843	16.8169	15.7562	16.2172	16.3597	16.2161	16.7219	15.6345	16.9491	16.097	14.5965	15.3912	16.8489	16.6713	16.7952
MED15	14.6294	12.938	14.0186	15.893	14.641	15.3464	13.1777	15.1833	14.124	14.9121	13.2672	15.3406	14.7878	13.5314	15.3012	14.173	13.8098	14.0743	13.785	12.7099	12.7493	14.1664	14.5142	11.4343	13.9723	14.7857	13.5333	13.534	13.346	18.1061	14.9385	14.8288	14.8538	15.234	14.6599	12.6741	14.8102	14.5393	12.9922	13.5058	16.7267	16.0877	15.6849	15.9201
MED24	15.4684	14.3286	15.9213	18.2264	14.3534	13.912	15.0178	14.9054	14.8142	14.2939	14.8318	14.369	15.7734	14.6054	14.1174	14.3666	14.79	16.9909	14.3465	13.2791	14.4274	15.0986	13.9452	14.5765	14.8431	14.7677	15.1828	13.1627	14.0193	14.9333	12.4665	12.2076	13.5771	14.437	13.7518	12.749	13.9874	14.2509	12.7524	14.1706	14.8347	14.9695	14.09	14.3593
MED4	15.5577	13.0209	16.8174	16.952	14.7415	14.3313	14.6798	14.0164	14.3441	14.5092	14.8286	15.7603	16.0517	14.7066	14.1983	15.6033	13.7222	15.1619	11.8578	12.8035	13.0949	12.3687	12.6918	14.4199	14.3569	14.2299	14.3517	14.287	14.0926	13.4839	12.2882	14.4222	14.2242	14.6508	15.7136	16.1741	12.4817	13.9498	13.5465	13.5305	14.7741	13.7854	14.7568	15.7802
METTL7B	17.9838	17.6791	17.8443	18.8441	17.273	16.4642	17.0613	16.3353	15.8191	17.7591	17.277	18.4675	18.3695	16.9255	17.7835	16.737	17.8956	18.4053	17.136	16.8431	17.3971	17.2461	18.7098	12.2017	16.701	15.9767	16.4528	17.6041	16.8842	15.7301	15.7197	16.9242	15.1904	16.248	15.4023	15.246	17.7878	17.0923	17.6944	17.5296	20.4876	17.4832	19.6922	20.0843
MFN1	14.6063	15.1862	15.6114	15.2633	14.6268	14.7446	15.1153	14.802	14.9575	14.9002	14.9948	15.1261	14.9004	14.6969	14.9401	14.2438	13.8723	15.3924	14.9824	13.9102	14.077	13.8785	13.8557	14.9338	14.1682	14.2765	14.9013	14.6453	13.3189	15.0874	13.9103	14.1731	14.2302	14.5022	14.3947	14.4548	13.8467	13.7507	13.8863	13.6776	15.2691	14.3634	15.6683	15.8044
MFSD6	15.4326	15.4451	13.1964	15.748	14.9068	13.8816	12.3369	13.0405	11.9737	14.88	15.7607	14.7814	12.7695	15.9519	14.6307	12.6288	14.1375	13.7523	13.6504	14.1641	13.9617	13.8464	14.5047	12.6789	12.1902	12.4172	12.7053	12.5714	12.7167	12.894	14.279	13.9053	13.8674	14.609	14.0337	14.4868	14.7564	13.6804	14.2147	14.4311	13.4814	14.5738	15.4037	14.0621
MGLL	14.5259	15.7898	16.5276	15.2544	15.6501	14.4598	14.9393	12.7582	14.0807	15.4897	15.216	17.2904	15.1743	16.106	13.216	14.1818	14.0661	12.1723	13.7919	14.9298	13.4288	14.9511	14.8036	15.6214	15.0242	11.773	14.9083	15.3726	14.9198	15.5274	15.1167	15.4887	15.0082	15.8131	15.345	15.6042	14.9436	13.32	15.2378	15.2653	13.3842	11.5117	14.2395	18.4255
MIDEAS	14.7427	14.6754	16.2553	15.8382	13.4416	14.4464	15.3238	15.0921	15.4717	12.3576	14.2079	13.6253	16.0703	14.7657	13.8294	14.0231	14.5829	15.4482	14.5954	13.7353	14.5742	14.8111	14.1552	13.425	14.3712	14.414	13.9659	15.2027	13.8692	12.1172	14.385	11.8277	14.4843	14.5623	12.4067	12.4607	13.6511	14.0732	14.294	14.736	14.0824	13.3425	12.9859	15.3789
MLST8	14.5211	13.3309	16.2794	14.8833	12.0202	14.4801	12.0111	11.8426	13.9533	15.5037	14.8074	13.8682	14.806	15.1706	14.3394	14.7602	15.2806	15.397	15.5105	14.9467	13.9534	15.8987	15.3408	15.4687	14.6587	16.1736	16.2777	14.2547	15.3231	12.4908	12.8368	14.6913	12.4566	12.6351	14.3839	12.8035	14.6832	15.0233	14.8731	13.1931	15.7512	15.4468	15.1355	16.1361
MMAB	15.8916	16.5006	17.6937	17.8803	17.1251	16.5088	17.3001	16.7765	16.6793	16.2823	16.9453	16.1316	17.586	16.268	15.9856	16.5573	16.8271	17.2933	16.1407	14.9128	15.2337	14.8013	16.8598	16.9956	15.4338	13.9853	15.7414	14.8145	15.4789	15.1856	15.9561	15.2608	15.2455	15.9193	15.9377	15.6155	16.4071	16.5525	15.7762	16.542	17.7393	16.3673	16.8505	18.1535
MMP14	15.755	15.7815	17.6403	17.0583	16.3447	15.0783	15.547	15.3982	17.1971	15.31	15.3487	14.461	16.2938	15.4227	14.8795	15.1809	15.1363	17.1598	15.3668	14.6948	14.3681	15.8206	15.7792	2.98019	16.9181	15.6335	15.7067	16.2786	15.8607	17.2491	15.6267	15.4265	16.0415	14.3441	15.4531	14.8759	14.2437	15.1884	14.3133	13.8365	15.9491	13.9961	13.7113	13.8614
MPP1	17.5062	17.2611	14.4932	18.1881	14.7244	15.0591	15.9616	14.7208	15.5527	15.7496	15.85	17.0296	17.5315	15.874	15.1852	15.1615	16.7128	16.789	14.9108	15.551	15.3833	15.6015	16.5477	16.4339	15.1778	15.647	15.1774	15.3063	14.5803	16.1787	15.4739	15.2454	16.2507	15.3749	15.2704	16.0298	14.4645	15.0475	15.2124	15.2437	15.3184	12.9617	13.7073	16.2494
MPZL1	17.1931	18.6898	19.9079	14.1792	17.7537	16.835	18.5777	17.7133	18.5521	17.2577	16.9585	18.3414	17.7046	17.5221	16.9432	16.8587	16.472	17.9677	16.5616	15.6089	16.4313	16.5082	16.221	13.0589	16.7298	16.7545	17.1458	16.9661	16.7065	16.8929	16.6582	17.1285	17.0736	16.4256	16.5083	16.4712	16.5554	16.1117	15.6634	16.1771	16.3915	16.3896	17.3599	14.0682
MRPL16	16.8127	15.2664	16.4637	17.662	16.0729	15.5711	16.9801	16.6114	16.5813	16.6342	16.7579	17.6176	17.482	16.951	15.5728	15.5002	15.0831	16.0382	15.0982	16.4084	13.706	16.2166	15.3811	14.9071	16.1698	15.6364	16.2733	16.4768	15.3933	14.544	16.1289	16.7999	15.626	16.5415	16.1249	15.9846	15.7931	16.49	14.5447	14.5249	17.7912	17.4009	16.8122	16.4056
MRPL19	17.7561	17.6263	18.7335	19.2082	17.5175	17.77	17.1889	17.896	16.6096	17.5705	18.0532	19.0528	18.9407	17.3439	17.3097	17.3546	17.0658	18.8193	17.4811	16.6725	17.6392	16.7981	18.17	17.2779	18.3654	17.6022	17.7299	17.6257	16.8595	17.0563	17.6092	16.9601	16.9198	17.4073	16.9114	16.5349	17.0165	17.9384	16.8207	17.1308	18.1717	18.204	18.3503	17.4352
MRPL4	17.2573	17.461	16.3517	17.5635	16.8554	16.8035	17.0776	16.7484	16.4535	16.8084	16.4987	17.3565	15.7224	17.058	16.1968	16.2022	16.3456	19.0571	16.719	15.8665	14.9682	15.3119	15.4322	12.9658	16.9328	15.7104	16.2679	16.9613	15.5984	14.9026	15.5047	14.6586	16.0834	16.2174	16.1021	11.579	15.6201	16.2265	15.0478	15.7133	17.6754	17.1252	16.9264	17.5313
MRPL45	17.3153	17.5708	17.2557	18.6547	17.4511	16.8837	17.7626	17.2949	17.1816	17.5265	17.4366	18.1514	17.9183	16.9385	17.6375	16.4941	16.4301	18.6437	15.6492	16.3637	16.5516	15.646	16.5727	15.9058	18.1432	17.3271	17.0867	17.3725	16.6275	16.4729	16.8578	16.5456	17.1832	17.7908	16.8684	15.659	16.1492	17.2852	16.1447	16.3029	17.7977	18.1975	17.6742	17.8794
MRPL46	18.0404	17.0317	17.4051	19.0355	17.9053	16.4802	17.4864	16.6379	17.0624	16.4763	17.3695	18.2509	19.144	16.8194	16.7252	15.5903	16.3032	18.3888	16.6414	16.1771	15.8828	16.1802	16.1446	16.7952	16.7678	16.4905	16.5163	16.9806	15.9314	16.3501	15.1402	15.0253	15.5156	14.6816	13.1217	15.0701	15.9425	16.8487	16.0312	16.0238	17.3213	17.0644	16.8408	17.4779
MRPL47	17.7432	18.7952	17.1414	18.9639	17.9023	17.0593	17.3187	17.3795	17.4436	18.0209	17.7173	18.4073	17.4346	17.7895	17.5501	16.9031	17.2802	18.5732	17.4161	17.1323	17.0756	16.6568	17.5391	16.4629	17.5569	16.9477	17.074	17.0103	16.8432	15.9554	17.2833	16.7273	16.6092	17.6971	17.4604	17.1765	17.185	17.7941	16.8524	16.9525	17.3186	18.146	18.0985	17.8193
MRPL49	17.2541	18.1861	18.6999	19.6962	18.6138	17.2955	17.5414	17.3165	17.0355	17.444	17.7628	18.6535	19.2372	17.5951	17.1584	16.647	16.7695	18.6009	16.5662	16.6968	17.0997	15.4799	16.5651	16.8532	17.6381	17.6978	17.3697	17.3271	16.5707	16.537	17.3386	16.9395	17.0509	17.0863	16.8649	16.8062	16.2837	17.9068	17.0881	17.1878	16.5602	17.7891	18.8669	16.273
MRPL54	17.055	16.8804	17.825	18.0508	17.4914	16.6768	16.7272	16.0969	17.0134	16.501	17.3066	18.3375	17.8485	17.4244	16.2932	17.0697	17.7027	19.8119	17.6141	11.7876	13.9788	12.4749	11.8215	16.3011	16.7983	16.5724	16.1191	16.6513	16.5993	15.7487	14.2312	16.5928	16.171	12.0017	16.4153	16.6907	14.681	12.9225	14.126	13.9602	17.6428	17.1533	16.7012	17.2997
MRPS23	18.0499	17.2218	18.1646	18.5429	17.9712	17.3231	18.1108	17.5875	17.4856	17.5711	17.4389	17.5408	17.9757	17.2864	17.6599	17.2878	16.9057	18.4891	17.7789	15.8829	15.4108	15.9305	16.8027	16.9573	17.563	17.445	17.3564	17.7787	16.9903	16.2172	17.3562	16.8093	16.99	17.7467	16.853	16.7246	15.6764	16.7448	15.5914	15.3758	17.4852	18.4254	18.9997	17.5615
MRPS31	17.6268	17.8102	18.1265	18.9537	16.6244	17.2626	17.1857	17.2683	17.4965	17.7381	17.0521	18.1414	18.6622	16.8909	17.563	16.2972	16.4253	17.8341	17.2739	16.3203	16.5666	8.79562	15.8522	14.9993	17.6593	17.3755	17.1834	17.4841	16.7656	16.1208	16.8288	15.8131	16.7486	17.1427	15.5525	16.435	16.0743	16.6682	15.4179	15.5498	17.4966	17.8763	18.1078	18.3667
MRPS34	15.789	16.9238	16.8649	18.5215	17.0919	16.5743	17.3524	17.0905	17.2792	17.2064	16.2984	17.395	16.8594	16.6993	17.1747	16.0695	15.573	19.0702	15.7348	16.2688	16.4304	15.2856	17.4116	17.3204	16.4188	15.7866	16.9472	16.3348	16.4589	17.1512	16.1763	14.9616	15.88	15.7711	15.7292	15.2685	16.0936	16.39	15.8219	16.1892	17.4427	17.9525	18.3976	16.2463
MTARC2	15.2728	15.6387	16.975	17.5762	16.0625	16.0366	16.6499	16.3836	16.9317	16.946	16.3062	18.089	16.694	17.6297	16.8417	15.4323	15.1915	15.8041	17.1565	16.857	15.4167	16.0867	14.8461	17.9883	15.7659	16.0485	16.2737	17.287	13.4559	15.3882	16.1859	16.5	15.8432	16.7535	16.4715	17.2651	16.4846	15.8697	16.4134	16.0287	15.6476	15.1037	16.3878	16.0276
MTDH	18.306	18.1147	17.6009	18.8871	18.036	17.605	18.2329	18.0945	18.893	17.9975	17.8095	18.3315	18.4446	17.7897	17.987	18.5134	18.1721	18.994	18.0671	16.8721	17.5591	17.5313	18.0373	17.5216	17.7239	17.4002	17.3919	17.5699	17.4046	17.5209	18.4526	17.9908	18.495	17.9014	17.9883	18.1459	17.6371	17.0771	17.5192	17.7456	17.8383	18.5958	19.2489	19.0219
MTMR1	16.3086	15.1186	16.7197	14.8495	15.512	14.6403	14.3679	14.4114	13.289	15.2039	15.5921	15.8796	16.6326	15.6738	15.8756	14.5531	14.6547	17.8289	14.9443	15.1656	14.9455	15.5734	14.2715	14.9504	14.1695	14.8999	14.1335	15.4791	15.2396	14.3601	15.1627	15.3685	14.9967	14.9561	15.5055	15.6054	15.0165	14.9852	14.1117	15.188	16.26	15.7273	15.0861	16.3673
MTMR3	13.7255	12.5232	15.8591	16.684	14.147	14.7696	13.2233	14.2191	13.9052	14.5788	14.0699	17.4563	15.8409	11.7708	13.9767	14.5723	13.6584	15.8538	13.3632	14.3715	13.5166	14.2354	14.5296	11.45	14.6678	13.8144	12.0469	12.9315	11.8904	12.5013	13.7197	14.0012	14.1835	14.408	14.5459	13.5374	14.7573	13.705	13.6722	13.5946	14.7293	14.5691	13.9346	15.8868
MTX1	17.1917	16.8371	19.073	18.7544	17.3843	16.2408	16.7307	16.1188	16.4812	16.9334	16.6577	17.0029	17.5155	16.6821	17.1002	16.2832	15.9152	19.5381	17.313	16.3836	15.7387	17.9408	15.9017	15.8454	15.6253	14.5525	15.6787	16.3968	15.185	16.1383	15.7998	16.2836	15.6146	17.9359	15.9151	16.9802	15.8762	16.055	16.0932	15.7564	16.7763	17.198	16.518	17.7509
MVK	17.1192	17.0373	17.0422	14.0909	16.8709	17.0847	16.7407	16.6399	16.135	16.5352	16.4296	17.8078	16.953	16.6603	16.7843	15.7754	16.0671	16.9682	15.4746	15.6306	15.7307	13.6101	16.1179	16.4782	16.4656	16.5798	16.1435	16.3215	16.1682	15.9309	16.7241	17.2473	16.4066	15.7497	16.3429	17.3321	16.4369	15.8164	16.098	15.6724	17.3576	17.4875	16.589	18.2032
MYH8	12.2524	12.9534	14.2315	14.6981	13.6048	12.3857	12.1526	11.6605	12.5312	12.5116	12.8437	12.9127	13.1939	11.915	10.4069	10.8595	11.3232	12.9927	11.2842	12.1275	11.5055	12.6726	11.353	13.3917	11.6096	11.7561	12.8774	12.0985	12.2257	12.9027	11.3897	13.0213	11.1316	13.9254	11.2909	12.2725	9.58505	11.7525	11.6452	10.9955	17.119	16.1157	15.7412	14.0008
MYL12A	20.4284	18.7656	22.6222	20.9	19.5396	18.9837	19.0062	18.5539	20.3384	19.3384	20.105	19.8932	23.7142	19.624	19.5531	19.0567	18.8862	23.1312	19.5913	18.4845	19.1782	19.7273	17.851	19.4545	19.4613	17.7776	17.8285	17.6371	18.5058	19.4429	19.7518	18.0583	19.5026	18.9465	18.9518	19.3529	18.6642	18.4616	18.3782	18.6043	18.6958	17.9231	18.3093	19.1654
MYO1E	17.4371	17.2874	17.2214	18.1895	16.99	17.0217	17.2366	16.9506	17.5199	17.6351	16.7537	17.3609	17.8766	16.4717	16.74	17.2314	16.6411	18.49	16.73	15.8511	16.7977	16.7462	16.4154	17.2115	16.9858	16.2382	15.9384	15.3652	16.7885	17.5026	16.5344	17.2708	17.2136	16.6063	16.7149	16.2012	16.9241	16.2006	16.6927	16.729	16.5955	16.6321	15.7627	17.4307
MYO5C	15.4543	16.0452	15.5706	16.437	14.16	15.6429	15.416	14.6175	14.8613	15.7963	15.4171	16.884	16.7965	15.8589	15.5037	14.9514	14.6021	16.4751	13.644	15.1652	14.6971	12.3482	14.3149	15.7572	15.501	15.8405	15.5349	15.4284	14.4421	16.2169	13.5621	15.6921	14.6565	14.9379	14.8981	15.5141	15.6583	14.8847	14.579	13.2771	15.7346	14.8691	13.1166	14.8101
NADSYN1	15.3998	15.2555	18.2009	16.6737	17.4156	14.0656	15.6757	16.6946	14.7589	15.8921	16.3091	14.4815	18.5919	15.6503	14.3327	16.3525	15.7055	17.554	15.7244	15.486	15.5521	16.2798	16.1563	12.5572	15.0053	14.067	6.47724	11.1416	15.3291	16.0861	14.5088	15.6565	15.3892	14.9074	14.9413	16.0198	15.4282	15.1539	16.0894	15.1407	15.4186	15.6685	16.0062	14.154
NAGK	18.752	17.3047	18.4896	19.4098	17.8649	17.4045	18.312	17.375	17.8887	17.8197	18.5722	18.0757	19.3521	18.5126	16.4381	18.4666	17.894	17.7371	18.3262	18.4734	17.1131	18.9831	18.2017	18.9064	16.316	17.9903	17.6098	17.7845	17.389	17.6253	17.2598	17.5683	17.425	17.5514	17.9373	18.3959	18.0409	16.9161	17.9704	17.1972	17.1665	16.4433	16.4494	16.6509
NCKAP1L	18.3106	17.7344	16.7304	20.3053	16.2109	17.3038	16.7662	16.4722	17.1116	17.6307	17.603	14.1186	17.9839	18.1965	12.4881	17.6566	16.3959	18.1726	17.1255	16.7064	16.6007	17.7547	16.6486	17.9657	15.9132	15.7401	14.2796	15.5096	15.9749	17.7374	17.8655	16.4308	16.7408	16.2538	16.3785	16.506	16.2994	15.8002	16.8314	16.1639	17.7489	15.767	11.9822	12.4278
NDUFS2	18.2434	18.7263	17.9741	18.9261	18.724	18.7707	19.7061	18.2665	19.0512	19.005	19.1351	19.186	17.4899	18.8672	18.2754	17.2697	16.3297	18.2534	17.5551	18.6078	17.7183	16.98	17.8981	18.8267	18.1581	18.8134	18.233	18.5839	16.7314	18.5489	18.0896	18.677	18.5181	18.7735	18.3306	19.0271	17.6163	18.3916	18.1558	16.9276	18.0924	19.2162	18.1747	17.9127
NELFB	16.8946	16.046	17.3989	17.2402	16.8635	16.0578	16.7691	16.3148	16.4348	15.8806	16.3357	16.591	17.5225	16.4464	16.6421	15.2953	16.1961	16.9385	15.4167	15.7305	16.2154	16.0904	15.7979	16.0786	16.5	15.9585	15.9609	16.4439	16.6448	16.8059	16.2638	16.3643	16.3716	16.6894	15.8171	15.9018	16.2852	16.0847	15.7035	15.8234	15.396	16.3064	16.6268	16.4602
NGEF	14.2291	13.5812	14.1223	14.2854	13.9221	12.2698	12.1334	10.9003	12.7375	12.7432	14.2651	15.5522	14.4256	14.5731	12.7919	13.679	13.2697	14.9215	13.0282	12.7449	13.0339	13.4907	12.5651	12.5965	12.5185	11.8887	11.0659	11.7993	11.9312	13.5685	11.3441	12.447	13.2255	12.667	12.1588	13.445	12.6007	12.4891	12.81	13.0832	12.6253	12.8973	11.8265	12.2017
NISCH	15.0921	15.2782	16.3121	16.0767	14.1211	14.5678	15.5029	14.3052	14.8391	14.0154	14.2218	15.8536	15.3812	14.8275	13.9367	15.4625	13.2138	14.0008	14.0487	14.7331	13.8418	14.254	14.4023	15.7256	13.6915	14.9424	15.289	15.1671	14.7956	15.5415	14.3494	14.2514	14.5105	15.042	15.109	15.4607	14.3807	13.8355	14.1221	14.6665	14.8373	14.1492	13.6287	14.5993
NOS3	16.5229	12.7164	16.2122	16.9109	14.8716	14.7692	13.5946	13.5066	12.6527	15.4163	15.7333	13.5881	18.4463	16.6825	14.4625	15.135	14.2775	16.0576	15.6565	14.4137	12.7311	15.1116	14.7448	12.9454	15.6864	13.6516	12.7035	14.4269	11.1427	12.376	16.1473	14.4188	14.6934	13.3975	15.6014	16.2323	13.9951	13.3672	14.4512	15.5764	12.2324	11.3635	13.1243	13.6835
NOTCH2	13.6111	13.7306	14.7714	14.7672	11.1137	12.2622	14.1854	12.4238	13.3248	12.6699	12.9041	13.8235	14.3509	12.1984	13.5499	13.6088	12.2793	16.1521	13.8383	13.3404	12.1175	15.0764	12.5812	13.6061	9.46369	13.2673	10.7441	13.4737	11.6196	12.0966	13.46	12.6294	14.0394	11.8594	13.645	14.4371	12.7285	12.7979	12.7837	11.7099	12.8228	12.9894	13.4813	13.2254
NPEPL1	15.66	15.3851	18.1747	16.5901	16.4566	16.236	16.2147	15.5961	15.9748	16.2016	16.4177	15.9566	17.0807	16.2185	15.1731	15.8609	15.7211	15.3046	15.6144	15.6135	15.4155	15.5237	14.8424	15.877	15.2596	15.3391	16.262	17.7556	14.2668	16.425	16.5605	15.8266	15.2047	17.0242	16.6989	17.5321	15.3843	15.44	15.2872	14.185	15.4566	13.5213	15.1491	15.904
NRP1	15.475	13.8258	16.1652	16.9013	13.8759	14.5122	15.4856	14.55	16.425	14.9388	13.204	15.1609	15.3263	15.652	13.3153	14.905	14.2743	14.834	15.5357	15.0002	14.0627	17.0396	14.5836	15.7072	12.6858	14.5176	13.6909	15.2159	13.0254	15.2931	15.7015	15.779	15.7629	16.0217	16.3329	16.2383	13.3919	14.164	15.0208	13.5408	13.1344	12.3009	12.3361	13.2653
NSFL1C	18.333	18.7037	19.0235	20.1259	18.4206	18.9057	18.8503	18.5351	18.4406	18.415	18.688	19.0613	19.2017	18.4183	18.4159	18.3671	17.7691	19.5019	17.9957	17.7178	17.6723	18.4588	18.1622	18.5829	17.3864	18.5215	17.9067	19.1096	19.025	17.9102	18.2182	18.1358	17.8654	18.5404	18.1999	18.7558	17.3767	17.9332	17.8833	18.5688	18.7311	18.4226	18.8344	20.6324
NT5C3A	16.3301	17.0229	16.6385	17.3752	16.1591	16.4438	16.2147	15.582	15.3078	16.0032	16.1009	16.9559	16.866	16.2922	14.7792	16.4202	15.9577	17.2064	15.2599	15.0554	15.5976	13.2804	14.7174	15.7162	16.1115	15.7316	16.202	15.9324	16.1338	15.2558	15.365	15.6032	15.2112	15.8918	15.199	14.4825	16.2194	13.69	15.7996	15.4236	14.9397	16.1034	16.9176	17.915
NTPCR	16.8162	17.8132	17.3784	14.0994	15.826	16.9822	16.3839	16.2005	16.5553	16.6524	15.7483	17.8873	16.7286	16.6944	17.039	15.9133	17.2361	16.5331	17.0787	15.7413	14.6233	16.8953	15.3231	15.1614	16.3628	16.8374	16.2923	15.6989	17.4426	15.8912	16.2265	16.1916	16.4185	15.7924	16.6124	15.055	15.4698	17.0278	15.729	15.684	17.2571	16.9321	14.77	17.7567
NUCB1	19.5436	19.2965	20.5566	20.4274	19.2821	19.8658	19.6332	19.4746	19.6018	19.9963	19.5864	20.224	20.4968	19.9219	19.7536	19.5038	18.9991	20.4573	18.9484	19.0417	18.9264	19.8405	19.4041	19.8959	18.6121	19.2406	19.1618	19.7936	19.4327	19.1382	19.317	19.7786	19.5467	19.1416	19.5059	19.0906	19.0823	18.9793	19.3419	19.3251	19.4265	19.0729	18.2632	20.0387
NUCB2	17.8978	18.6932	18.933	19.1849	16.931	18.2713	18.196	17.6056	18.3139	18.7063	18.235	18.9445	19.7752	18.274	18.1295	18.067	15.9399	18.895	16.0453	17.5849	17.011	17.7604	17.2577	19.1732	17.2725	17.8578	17.1323	18.0059	17.7157	16.9201	17.4296	18.8375	17.2655	17.0899	17.5976	17.6528	17.7496	16.9105	17.4258	16.4079	16.3128	18.6146	16.7314	17.864
NUDT5	17.4055	17.9624	19.3799	19.0056	17.7105	18.3021	18.3473	18.2702	18.3223	18.3722	17.2865	18.345	18.0912	17.1615	17.6833	16.0334	16.6466	19.0149	15.7983	16.4946	15.9284	16.2659	15.9189	18.0801	18.1003	18.0965	17.1302	17.8831	16.8532	18.1845	16.7072	17.2659	17.5407	17.3388	16.5697	17.0732	16.2455	16.0562	16.4854	16.2569	16.6625	17.5928	17.8138	18.6724
NUDT9	16.5296	16.2879	17.1869	16.8381	15.7281	16.4935	16.7412	16.2988	15.702	16.0105	15.9574	17.6628	16.9524	15.8623	15.1399	15.2707	15.4976	15.7626	15.8019	15.5441	14.1032	15.3948	15.1189	16.064	16.7089	15.942	15.3087	16.5843	15.7001	15.6738	15.6384	15.9049	15.9975	16.0136	15.1539	15.1829	15.0716	14.7527	15.1659	14.4427	16.272	15.94	16.6417	17.3672
NXPE1	18.0619	16.2133	14.2344	15.5291	16.2917	16.7823	17.5424	15.8465	12.4628	18.2097	17.3521	17.6764	19.5002	18.9475	12.5459	16.1578	16.0159	12.8878	11.3174	17.181	16.2698	11.5812	11.9558	14.0777	14.9705	16.197	16.5298	16.264	15.0642	12.7474	12.9795	17.1741	11.8024	15.9802	15.9406	15.7812	16.2713	14.5397	17.185	10.5815	11.6643	12.1312	13.0096	12.2623
OCLN	16.6973	16.2159	17.3643	17.0706	17.1372	16.6957	16.6895	15.7366	15.6175	16.743	15.8788	17.6721	17.9346	16.6402	16.6884	15.2999	15.8179	17.2456	15.9653	14.9881	16.1238	13.332	15.4897	16.6055	16.031	16.3709	16.4315	16.1731	16.4962	15.8232	15.9252	16.0282	16.1569	15.7311	16.0292	16.8587	15.1992	15.6177	15.5252	16.0693	15.0653	16.0621	15.818	16.3433
OCRL	14.6982	14.4276	15.8227	16.3455	15.0663	15.4017	15.1296	14.9786	15.0256	15.248	14.7317	16.4436	16.2515	14.8786	15.6449	14.186	14.2705	16.0992	15.1693	14.8809	13.9879	15.7018	14.9873	14.8518	14.5507	14.9383	14.2955	15.4859	14.6441	14.9556	15.0816	14.8429	14.9885	15.4576	14.5515	14.8537	14.8965	13.7096	14.3034	14.6626	14.4986	14.8456	14.1465	15.7807
ORC2	17.6093	13.4238	17.8063	19.2701	16.477	16.8579	16.1526	15.4753	15.9514	12.7091	16.1961	14.4416	16.7777	17.3821	16.2617	14.6344	14.9376	16.7285	16.3389	14.1535	15.212	14.7671	15.028	12.6009	15.8577	16.7451	16.5118	13.414	15.3368	17.1978	14.9697	14.565	15.3451	14.896	12.2809	13.176	14.1818	15.274	13.3848	14.582	14.9635	15.5586	16.4063	17.8151
ORC4	14.896	13.5935	15.2605	16.0081	14.5774	13.4007	14.2386	14.1504	13.1283	14.2058	13.7648	14.3009	15.6843	13.7114	14.091	12.8331	13.1047	14.455	13.9263	13.4	13.5662	13.0738	14.0374	12.4765	13.2029	13.3868	13.7137	12.3795	12.5198	13.396	14.4783	12.2666	14.1466	14.1974	12.9266	16.4929	13.6065	13.7518	12.142	12.0535	14.2758	14.7471	14.0528	16.1978
ORM2	14.5825	15.6854	19.3429	14.7634	14.9093	15.0595	12.5999	14.6467	16.2389	16.1001	14.5199	16.5312	17.2465	17.5407	15.3994	15.3449	15.7104	15.0489	17.7007	18.7158	13.3671	18.0351	18.1513	19.1474	15.7809	15.0409	16.2579	16.3806	15.7325	18.1121	13.8312	16.2183	13.7437	17.2174	14.8493	16.3249	18.0732	17.2801	17.0955	15.4298	12.3348	11.7018	12.6778	13.5956
OSBPL11	14.4301	14.3663	15.2588	14.5445	14.1794	13.7327	12.7372	14.115	13.031	13.4167	14.9956	13.5362	14.6706	13.505	12.5126	15.5088	13.6333	14.5699	13.7649	13.3066	13.8149	13.6134	13.0565	12.3546	13.2162	11.5698	12.1988	13.9463	13.1398	12.5392	13.6683	13.0644	13.6539	14.3115	14.2497	14.0482	14.0646	12.6643	13.3372	13.3192	14.9822	15.3321	13.926	14.5937
OTUB1	18.0776	18.5755	19.1523	19.6931	18.4551	18.3543	17.8464	18.0004	17.3535	18.2581	18.4376	19.3266	18.9071	17.762	17.3596	18.0941	18.1756	18.1533	18.2686	17.5005	18.3547	18.0147	17.8894	18.1482	17.2169	16.8707	16.9668	18.4648	17.8382	18.3593	17.0613	17.5889	17.9384	17.9551	17.3201	17.4501	18.3675	17.5735	17.9928	18.4782	19.0735	17.7823	18.3281	18.8592
OXSR1	17.812	17.2601	18.274	18.2576	17.1524	16.9585	17.6458	17.6358	16.7895	17.1432	17.2522	17.9224	17.5369	17.3224	17.4572	16.6075	18.0937	17.7898	17.3375	16.9208	16.407	17.0052	16.3454	16.9225	17.0344	17.1818	16.4512	17.6095	17.2646	16.5998	17.2544	17.5646	17.2019	17.3881	17.1803	17.6587	16.7377	16.6093	17.213	16.874	17.7004	17.0352	16.0745	18.2918
PAF1	14.6397	15.3789	15.5505	16.7994	14.3531	15.0848	15.0263	15.2366	15.0171	15.0315	14.3875	14.723	14.8086	14.3515	14.9941	14.0684	13.293	14.962	13.3982	13.3208	14.0148	15.7593	13.9881	14.5004	14.3356	14.9213	14.6552	14.988	14.3484	14.8074	14.7575	13.5176	14.5126	12.6924	14.5926	14.5952	14.0684	14.0654	13.5027	13.9624	14.8829	14.7489	14.0699	14.8654
PARP12	16.0003	16.0628	15.5758	16.5	14.9467	15.3926	15.3352	15.7182	15.4213	14.9115	15.0036	13.1781	15.5358	14.5829	15.0467	15.0259	14.7022	15.1692	14.4387	14.0523	14.4887	15.1087	14.4571	15.0995	14.6319	15.1972	15.0012	15.208	14.5281	15.3107	15.534	15.3142	15.5169	15.9065	15.1712	15.7523	14.8406	14.4398	14.9216	15.4444	13.7183	13.3545	15.4057	12.0271
PARVB	16.1066	17.0327	18	18.0779	17.0944	16.6391	19.1135	17.1457	17.9919	17.0774	17.2592	14.4709	19.1016	16.7036	15.974	16.8235	16.8673	16.3234	17.4729	16.6558	17.2966	18.4386	16.664	17.0762	16.2275	16.2693	16.3066	16.764	15.9231	17.0471	18.0676	16.9549	16.7941	18.2248	17.81	18.889	16.167	16.6965	17.1489	16.5409	15.7049	15.6544	15.5068	17.9369
PC	16.4299	16.97	17.5388	17.3146	15.66	17.0615	16.9066	15.4067	16.4115	16.5882	16.5443	17.5469	17.1967	16.6022	17.2944	16.6398	15.0143	16.1789	16.1104	16.2529	16.5105	16.3234	15.6501	16.6919	16.3516	16.0199	16.3684	16.0589	15.8401	15.2	16.0577	16.7488	15.486	16.2161	15.7339	15.5359	15.6782	14.7209	16.3259	15.6416	15.8425	16.3913	17.5288	17.375
PDCD10	18.0124	17.7712	19.134	20.0328	18.468	17.0085	17.9343	17.5956	17.8434	17.4557	18.0469	17.3253	19.0551	18.1151	17.3557	16.9214	17.6404	18.5489	17.1159	16.4789	16.5919	16.9965	16.734	17.7713	18.1284	17.0713	16.7105	17.6047	17.6928	18.0758	16.6103	17.3078	17.2584	17.1558	16.815	17.7353	17.4083	16.4288	16.3228	16.5964	17.0655	16.1412	17.5797	17.5332
PDGFRB	16.4114	14.4374	17.2792	16.8201	16.1729	15.2222	13.8244	15.0716	15.3053	14.4063	15.5236	13.8088	15.5944	16.1649	13.0203	15.3958	14.6981	15.6255	15.636	15.154	14.2832	16.9047	14.9418	15.4277	13.212	13.8424	14.8315	12.7076	13.5979	15.9073	15.4472	14.3714	15.5328	15.5201	15.6455	15.1805	14.4399	15.022	14.7826	13.9514	10.8557	10.8352	10.9597	13.4226
PDXP	17.105	16.5913	18.1229	19.4214	16.3036	15.8575	14.5884	15.3317	14.0327	15.9422	16.0318	17.0512	17.1488	16.8641	15.6583	16.3732	15.5377	17.0988	16.4764	16.3778	16.3395	16.4468	14.9379	16.3974	15.1636	15.7726	16.8449	16.0903	14.7604	15.3693	16.2462	15.8274	16.3865	16.4621	16.1984	16.1522	16.3112	14.8927	16.1711	16.5078	16.9683	15.629	15.7569	16.8972
PEPD	18.0264	17.7488	17.6447	18.9288	17.217	17.404	17.5005	18.1853	17.4392	17.7443	17.3226	17.6672	16.5432	17.4786	16.5386	18.382	18.3014	18.8138	19.2492	16.8757	17.1853	17.7478	16.7103	17.8119	16.5959	16.1446	16.6443	18.4058	16.6546	18.1178	17.1889	16.7602	17.65	17.0207	16.9028	17.6125	15.7928	16.447	15.8167	17.7331	19.4912	17.1881	17.7686	18.8338
PHACTR4	15.8406	15.4605	15.1814	16.555	13.8975	15.0827	14.9282	14.6065	13.1884	14.2329	15.3159	16.2943	15.8622	14.8959	13.6471	13.5954	14.4303	15.1472	14.7178	13.622	14.5412	14.7365	14.2118	14.8144	14.5026	15.0654	13.9591	13.0901	14.608	13.2527	14.6376	14.126	14.2048	13.3108	13.2278	12.57	13.6162	13.6133	13.8808	13.4779	13.3553	13.4165	13.3432	14.2649
PHYH	12.7241	12.5879	14.4076	16.2341	16.5423	16.3881	16.2437	15.8312	15.4308	16.9469	16.3431	17.7266	16.3203	15.6127	16.5664	14.8163	16.1262	16.2648	14.7722	14.7519	15.0026	16.1592	15.1297	17.544	15.8499	15.8431	16.393	15.8375	12.5285	12.6866	16.697	17.4583	15.6846	15.5485	14.4331	12.6752	13.6947	14.8504	14.9614	16.1432	16.9686	16.6768	16.4329	17.0792
PIBF1	13.0409	13.5509	14.4003	14.4219	14.4826	13.5764	13.4253	0.675486	12.7679	13.3733	13.2475	14.5121	13.8917	13.2129	13.1215	13.0151	13.1535	14.1072	13.1024	12.6488	11.9235	11.3152	12.4245	15.2985	14.355	13.5644	12.8595	13.8039	13.6971	13.9113	14.9153	13.093	14.4265	12.4059	12.6159	10.6847	12.8562	13.2673	12.0566	12.7422	14.6549	14.4587	14.5929	13.9088
PICALM	17.8284	17.0434	17.9518	18.5462	17.1284	16.937	17.2999	17.0635	17.7071	17.2721	17.7464	17.4466	18.4165	17.7616	15.9613	17.1244	17.0645	17.564	17.8418	16.8595	17.4996	17.2753	16.6448	17.7014	16.4385	17.0593	16.8246	17.6547	16.506	17.2007	16.9853	17.3127	17.3719	17.3424	17.3753	17.4906	17.3716	16.6549	16.9455	17.0213	16.5265	16.7915	17.1106	17.7255
PIK3R1	16.1129	14.9054	16.6331	18.2622	15.681	15.8847	15.725	15.2098	15.6516	15.7579	15.7346	16.0282	16.7551	15.4159	15.4438	16.0967	14.7765	14.9636	14.4725	15.0319	14.4521	15.6353	15.2376	15.5268	14.6974	15.8429	14.4872	15.991	15.4674	15.0188	14.7203	15.9436	15.1095	16.0728	15.3606	15.3456	14.6702	14.5466	14.2036	13.7755	14.1924	13.9786	14.1179	15.9752
PITPNA	17.7706	17.3043	18.1614	19.5681	16.1729	16.8186	17.171	16.8553	17.0964	17.0136	17.3793	18.0529	18.0529	17.8076	16.5351	17.5967	17.694	18.764	17.8741	16.8747	16.5711	17.7234	17.197	17.3174	17.0335	16.9959	17.136	17.3696	15.8641	16.4575	17.3114	17.2797	17.9883	17.8236	17.3469	18.4033	16.6628	16.58	16.7709	16.5889	17.704	16.0946	16.2175	13.4051
PKN1	16.3041	16.4487	16.0961	19.4523	15.4994	15.5924	15.5748	16.2284	16.2013	15.8017	15.8891	14.092	17.2731	15.723	14.5425	15.5792	15.32	16.8938	15.8243	14.8756	14.916	16.0154	14.9971	16.4852	14.843	15.7555	15.4738	15.7369	15.4782	15.9424	16.3881	15.2184	15.8743	16.0166	16.241	16.6927	15.2391	14.8299	14.7623	14.8603	16.4005	15.9805	15.3176	16.4016
PLAC9	15.1746	13.7035	16.2055	13.8437	12.6447	14.3393	16.7613	12.8745	16.4099	16.8048	14.559	16.9708	15.5615	16.2649	11.5484	14.5225	14.1249	13.0802	15.8121	15.41	12.7243	15.7821	14.6975	12.7783	11.2421	12.1867	10.5684	16.0319	15.7089	14.42	15.6428	17.112	15.689	15.9906	16.3724	16.2741	13.1557	13.3664	13.7902	13.9952	12.1089	11.5962	12.2365	12.8224
PLAT	15.6509	10.8581	14.5975	16.3744	13.2942	13.1702	14.2273	12.8418	14.0921	14.9064	12.9399	14.5647	14.4627	14.3325	10.8825	12.5287	12.9689	12.7476	13.3821	13.5229	12.837	13.9615	12.7568	12.4612	14.4045	14.9751	12.6112	13.6711	11.5771	13.2593	15.8801	13.6182	14.1765	15.0692	13.9343	15.2524	12.3295	11.9319	12.7604	12.504	12.6433	11.6158	11.4347	12.3043
PLCB2	15.4761	15.2323	15.7894	16.3525	15.7163	15.4572	15.0425	15.1419	15.4151	15.6538	11.605	14.1926	15.2028	16.2605	12.8946	13.7461	13.3771	16.5502	14.6183	14.0366	12.7261	15.3163	14.2632	16.7568	12.9919	13.9493	13.1126	13.3037	14.9068	14.7814	15.2469	15.508	15.2983	13.336	14.93	15.6477	14.2526	12.231	13.6959	12.9896	11.5988	11.8818	11.85	13.0028
PLCB3	16.2538	16.66	16.3011	17.3728	16.5754	16.4882	16.0763	15.4409	15.485	16.101	15.9815	16.4718	16.4295	15.7571	14.9215	15.1291	15.2085	17.3615	16.4868	15.2539	15.1192	14.3679	15.3803	14.8215	15.6354	16.5791	15.267	15.7517	16.082	15.8124	15.8108	15.6502	16.3511	15.9681	15.7357	16.3007	14.9645	15.2325	15.2755	16.0754	14.9753	15.7731	15.5724	16.9973
PLD1	16.8508	15.9011	17.4442	14.2917	15.4471	14.5939	15.3082	14.2889	13.037	15.4806	15.3137	13.8495	17.3309	16.402	13.889	13.4049	13.8044	15.65	14.2071	14.3901	14.6793	15.3802	14.3701	12.045	14.0064	14.3331	16.4224	14.6806	14.4729	12.4712	12.9957	15.7626	13.7775	13.0983	14.7425	12.144	14.4324	13.9197	15.2478	13.4721	14.3171	13.7979	15.0937	15.2312
PLEKHA7	15.5508	15.7261	15.75	15.8697	15.5745	15.1262	14.8619	13.9807	12.6429	14.8865	15.4816	15.3987	16.0218	15.0141	14.9469	14.3826	13.4194	15.7638	13.7879	14.7763	15.1335	15.8941	14.237	14.5393	14.8836	14.6685	14.555	13.8694	14.6762	14.3784	13.6197	13.9132	14.1706	11.927	12.2414	13.1353	14.1245	14.3412	14.1087	15.7526	14.5524	13.4594	14.5361	16.4233
PLRG1	16.1402	15.9349	17.3262	16.2637	16.3689	15.8773	16.731	15.7599	16.4107	15.9122	16.0296	16.1094	17.5754	15.6467	15.1899	15.5504	15.6902	17.68	15.6172	15.6083	15.5646	15.0705	15.5874	15.5185	15.5457	15.5721	14.9545	15.3399	15.0396	14.9908	16.4186	15.7907	16.0539	15.2145	15.4469	15.5731	15.0491	16.4356	15.6272	14.9247	16.389	16.2758	16.463	15.3535
PMVK	17.1401	17.4515	17.9282	16.8929	18.1401	17.6152	17.3685	16.9264	16.6662	17.2998	17.7041	17.863	17.7866	17.4246	17.4314	16.8405	16.6272	18.876	16.5258	16.201	16.5374	16.6959	16.0511	17.9156	17.0456	17.3268	16.288	16.9608	17.1116	17.2375	17.0405	16.8186	17.4708	17.0932	16.5807	18.109	16.4069	15.9939	16.4204	17.0902	17.0187	16.2423	18.2338	17.2961
PNISR	16.2846	12.2465	16.4701	17.0924	16.0758	12.5708	13.352	13.2475	13.1193	13.976	14.9116	14.1418	15.8841	15.2069	14.2758	14.2529	15.2899	17.2006	15.0483	13.8608	14.4069	14.1897	14.975	13.6451	13.4781	13.1648	12.7498	13.725	14.5967	11.9852	12.707	12.3496	13.8028	12.6304	11.7838	12.3215	14.2148	14.5869	13.8248	14.603	14.8458	15.5377	13.9376	15.27
POLR3D	13.5296	14.253	13.955	14.7327	12.6833	13.5391	11.3619	11.651	11.7995	13.7873	13.546	14.2615	14.0992	12.4705	14.9008	11.106	13.3389	15.1475	13.5236	12.3843	10.6653	11.0667	11.611	12.8764	13.6273	12.8144	13.448	12.8471	14.2761	12.6975	14.2035	12.3658	14.8684	14.0132	13.5217	12.8492	11.1011	12.5452	11.1549	12.0528	14.1009	14.3636	14.7324	14.4252
POMP	16.4855	12.2604	13.3043	16.6205	17.5	15.8415	16.8348	15.5073	15.652	15.9419	17.2856	16.4355	14.6507	12.4485	17.1702	14.079	14.5595	13.1587	15.6481	14.9051	15.8841	15.7204	14.2521	12.3267	12.915	16.087	16.4448	12.3554	11.0111	17.0065	14.8352	12.1607	15.2229	14.9024	14.3728	14.777	13.909	14.7079	13.5416	15.5241	16.3106	15.7987	15.9186	17.8635
POP4	14.3746	13.6448	17.2387	14.1231	15.6122	14.1817	14.2389	14.1718	14.1185	13.4582	13.7016	14.6368	16.2865	13.8079	13.7458	12.7423	13.4766	13.5794	12.3834	12.1694	13.1292	12.3867	13.7283	12.3842	14.1792	14.1257	13.9308	12.3356	14.0277	13.9863	13.8182	13.7669	15.0881	15.4021	14.1664	13.3886	11.8532	13.0263	11.2022	12.1807	15.5183	15.1461	14.5166	15.4443
PPAT	15.8899	16.2905	17.205	14.1028	16.6139	16.3333	12.9311	16.3825	12.8813	16.9029	16.6117	14.6345	17.4922	16.0143	14.8801	15.5862	16.2885	16.851	15.4032	15.3527	15.5057	12.7526	14.4853	13.286	16.6762	16.1112	16.3307	16.3215	15.8528	15.9623	16.7106	15.827	16.3575	13.8904	16.0275	16.4893	14.585	15.633	15.0559	14.6195	17.3236	16.4278	17.1334	17.4934
PPFIA1	15.2519	14.7102	16.3551	15.8779	15.0835	14.8851	14.8588	14.7188	15.1922	14.8009	14.5783	14.9369	15.9768	14.765	13.8705	14.8167	14.1636	15.6672	14.2672	13.7413	13.7085	14.8135	13.7861	14.9575	13.5627	14.7538	14.1074	14.6936	13.8256	15.0453	14.6851	14.5042	14.9982	15.1885	14.8812	13.6791	14.2002	14.1935	13.9647	14.4513	14.0527	14.2355	14.529	16.2055
PPFIBP2	14.8962	13.4724	16.8736	17.9353	14.8416	13.958	14.7486	14.3141	14.8992	14.8432	14.2718	15.7352	15.2209	15.0731	15.0106	14.3771	13.8034	14.8301	13.9867	14.4844	14.3544	14.2798	14.7914	14.9493	14.1283	14.1662	13.7087	14.9801	14.5458	14.5222	14.702	14.777	14.442	14.0758	14.5832	14.666	14.4516	14.4809	14.3533	13.8741	14.9648	13.3729	14.9452	15.5915
PPP1CA	19.4799	19.2482	19.8955	20.5927	19.6954	19.9922	18.9507	19.42	19.2857	19.4932	19.6857	20.208	19.7512	18.7144	19.687	20.0906	19.6684	20.9872	19.9421	19.3666	19.3897	19.4978	19.55	19.4615	19.5829	19.266	19.3027	19.3018	19.1923	19.5336	19.4105	19.17	19.296	19.6067	19.5731	19.9382	19.3257	19.4888	19.5159	19.7083	19.8418	19.6412	19.8224	20.2902
PPP6R2	13.9884	14.705	15.7578	14.2974	15.1375	15.6567	15.6644	15.0033	14.2725	15.0751	12.3463	16.0662	16.0546	12.3259	15.4272	15.1608	15.5212	15.3212	15.482	15.088	14.9946	16.1493	15.419	12.83	15.0365	15.5911	15.8285	15.7084	14.5626	12.1926	15.6651	15.0757	15.2439	15.0017	14.528	15.5311	15.3363	14.4262	15.171	14.3864	15.9609	15.3408	15.3839	14.9267
PRDX3	20.6486	20.7835	21.9989	21.9251	20.4318	20.3889	20.7694	20.4361	20.6919	20.4211	21.295	21.1867	22.2243	21.1071	20.6328	19.4123	18.083	19.9358	19.9769	20.5871	20.2673	19.5866	19.7689	20.4443	20.6672	20.4011	20.8299	20.858	19.1538	20.185	20.7996	20.7676	20.3833	20.5504	20.5126	21.1577	19.7448	20.6728	19.8295	20.7662	21.0768	20.6588	20.0511	21.2363
PRDX4	21.5187	20.9556	21.5932	21.65	20.4818	21.1024	21.3304	20.8813	21.75	21.3289	21.2918	21.7107	21.937	20.6299	21.5485	23.0881	21.6762	20.9808	20.9598	21.5834	21.1761	21.8025	21.3119	20.3984	20.3567	20.4922	20.9191	20.7469	19.8616	20.5657	21.3583	22.1455	21.3694	21.3953	21.4281	21.5624	21.8272	20.571	21.7242	21.3762	20.8967	21.5092	21.7275	22.1061
PRKAR1A	17.4917	18.316	17.7916	17.6612	16.7996	17.2415	17.8448	17.5569	17.9615	17.8238	16.6888	18.3746	17.8108	16.9529	16.3783	17.7374	17.6615	17.7339	17.3979	17.4583	16.5706	18.0021	17.0263	17.3623	16.5015	17.1284	16.6831	17.8263	16.4473	17.6292	18.3186	17.9629	17.5723	18.0523	18.0584	18.889	17.0437	16.4533	17.1635	16.09	17.3046	16.899	16.9324	18.5527
PRKCI	14.8689	14.6283	16.1029	16.0606	14.8989	14.2472	13.8163	14.2529	12.4708	12.6884	14.3905	15.8867	15.7999	14.1285	13.9725	13.7585	14.1438	15.0884	14.1373	13.5119	13.4799	15.5467	13.7367	12.4584	13.3949	12.9299	11.7313	12.2032	14.4175	14.5903	12.4699	11.3627	13.5547	13.4136	13.4204	12.4478	13.9513	13.1346	13.0643	13.796	15.0965	14.7939	14.3772	15.8731
PRPF18	17.0245	12.7635	16.6561	17.6925	15.4286	13.0854	15.3494	15.3995	13.0602	11.8612	14.3935	13.8218	17.1439	16.2876	11.3155	14.7015	14.844	16.4358	13.8767	13.3382	12.7158	12.6424	14.6111	14.8965	15.059	13.5875	12.3978	16.4107	12.5143	13.2026	14.7477	12.315	14.986	15.1719	14.5989	12.0775	13.889	13.1748	13.5815	12.5732	15.2642	14.5329	14.2113	12.5977
PSIP1	16.1445	15.8084	18.2939	17.7467	16.9805	15.8792	17.2624	17.0511	17.55	16.8758	15.8726	17.3326	16.982	16.9765	17.2726	15.6503	15.9744	16.4393	15.9879	15.8864	16.3364	16.2337	15.2266	16.3204	16.6102	16.36	16.1377	16.2212	15.6921	16.4252	16.9048	16.5105	16.5751	16.9956	16.6265	17.1942	15.5727	16.103	15.4273	15.936	16.5722	17.2957	16.6651	17.989
PSMB2	15.936	18.0578	18.2293	16.7518	16.8794	14.3677	17.4582	14.8822	15.8857	15.2529	15.6791	17.7538	18.7571	16.8098	12.8094	13.0774	13.6327	15.8662	11.7381	14.7644	14.9382	14.551	13.5713	17.7248	14.7323	16.6937	16.6423	17.0381	13.801	14.0945	13.6787	15.113	14.6191	15.8705	15.378	15.825	13.5365	13.5005	14.1575	13.0372	16.3804	14.7575	14.0503	12.6794
PSMB3	15.8617	15.889	18.4575	17.4887	16.8056	14.8416	15.9705	15.4574	14.9186	15.702	17.0869	18.9264	18.5342	16.3891	14.6646	17.4831	16.9718	19.3518	17.0565	16.0308	15.648	15.6911	15.6604	16.3345	15.5094	15.3332	14.971	15.198	15.4146	16.358	14.7931	14.511	14.9921	15.5148	14.9443	14.8413	15.898	15.7093	15.3134	15.353	17.3207	14.9767	15.0713	12.1317
PSMD4	17.5779	17.7973	17.5516	18.0843	18.2645	17.1296	16.2974	16.5606	16.6852	17.6679	17.8381	17.3914	17.0278	17.444	17.4366	17.2773	16.969	15.6442	16.128	17.0577	16.9326	16.8632	16.5087	16.3904	16.8739	16.7685	16.209	17.6043	17.4956	16.1331	17.3143	16.3585	17.6328	17.2918	16.8814	16.8172	16.7227	17.1692	16.9256	17.2282	17.9554	17.4496	17.4625	18.8066
PSMD9	17.1684	17.2963	17.5129	18.2147	16.2898	17.0449	16.505	17.2112	16.7443	16.7443	17.1681	16.208	17.9855	16.9915	16.227	17.4715	16.029	18.0468	16.8571	16.6083	15.7282	17.0637	16.3081	17.8444	16.0798	16.8006	16.7544	17.297	16.4273	16.8691	17.4072	16.8299	17.1095	17.5866	17.1276	17.484	16.9891	16.0586	16.5186	15.8164	16.5057	16.3276	16.2564	17.7255
PSMG3	14.8847	15.6387	15.4286	15.4741	16.0014	14.4288	12.5484	14.4573	13.0408	14.8275	15.4033	14.2241	14.5866	14.409	13.4184	10.9188	12.8406	13.2872	13.2534	13.1185	13.2682	12.7308	11.3626	13.7058	14.2848	10.9104	11.8346	13.4473	13.3236	14.9118	14.0447	14.3716	14.2357	14.0712	14.1611	14.6809	13.2226	13.4487	14.0993	13.2469	13.5918	13.7048	15.4697	15.0396
PTCD3	17.0356	17.7638	18.098	17.0511	17.611	17.0011	17.7173	17.2182	17.1734	17.4809	17.572	18.3204	18.3942	17.4371	17.6532	16.9929	16.7529	18.2197	17.4087	17.0022	17.4673	17.1856	17.6456	17.502	17.2215	16.8798	16.8266	17.4516	16.7303	17.93	16.3804	16.1705	16.2627	17.161	16.5414	17.1756	16.8423	17.3228	16.7038	16.7562	18.2161	17.8798	18.4691	17.2577
PTP4A2	15.6899	16.8804	14.2524	15.2474	15.3399	15.8558	15.6997	15.418	15.5472	16.8148	15.8882	17.013	15.0535	16.7071	15.2988	14.606	14.9117	16.4376	14.6579	15.8749	14.8782	16.2427	15.0751	15.5987	16.5092	15.21	15.155	14.7537	15.0479	2.71876	15.8166	15.8165	14.7618	15.1554	14.575	9.87756	15.1566	14.9199	15.0234	15.4869	15.5182	15.0185	14.9517	13.4608
PTPN18	13.9447	13.5914	14.4003	14.7584	13.3263	13.6866	11.1854	13.151	12.2682	13.9402	13.9663	13.9461	14.1434	13.7161	14.3253	12.4681	14.091	15.7012	15.3696	12.926	11.9763	12.8749	13.5035	12.9775	13.1914	13.9452	13.1084	13.1837	13.6131	13.0905	11.1258	11.4556	14.2392	13.5665	13.5493	13.4719	13.9009	13.1434	12.5094	11.9355	15.1837	13.8947	13.7278	12.6975
PTPRA	16.3014	14.3111	16.1975	17.8905	14.3066	13.7665	12.8857	14.303	12.4966	14.3111	15.7124	15.0391	13.7489	15.7075	14.8173	13.2925	12.2091	9.47585	13.2186	13.9394	11.9423	12.67	12.9757	14.6043	13.3708	13.6161	13.373	13.0388	14.3058	12.361	14.6044	14.0562	14.4226	14.9142	14.5144	15.1561	12.4053	12.5506	13.4757	12.5578	13.3044	12.7186	15.3141	13.7338
PTTG1IP	14.6083	16.8801	18.3284	16.7982	14.658	14.5943	15.9069	15.0156	15.7274	17.9747	12.5116	17.6244	13.0405	12.223	16.5122	10.9846	14.5224	16.1261	11.1367	14.9947	15.4732	15.5036	14.9211	13.8278	16.1806	11.8479	14.3139	12.9152	13.6661	12.485	15.7607	15.8552	15.1445	14.6125	13.2884	16.1093	14.512	14.8926	15.3915	15.3111	16.8664	15.4848	15.3672	13.5144
PXN	16.3772	16.4967	17.9544	17.6838	15.7858	15.9077	16.3248	15.4356	16.0692	16.0528	15.0185	17.239	17.1234	15.5174	15.4622	15.8792	15.5555	16.9998	15.9545	14.8061	14.9532	16.4323	15.504	15.5175	16.1467	15.4532	15.1403	16.801	15.8203	16.2555	16.3963	15.7095	15.6189	15.3836	16.092	16.346	14.8152	14.6019	15.0739	15.995	15.8902	13.8221	15.6572	16.4814
QPCTL	15.5956	15.4556	15.425	14.5435	16.5778	12.0686	16.3257	17.0169	16.1438	15.2478	16.6378	13.5815	16.9631	16.2443	14.7575	17.3004	15.8086	18.3436	16.2632	15.1935	16.1956	16.3368	16.9278	11.6881	11.4807	13.5207	12.2166	11.7914	13.7649	15.1488	11.9267	12.7481	12.2698	12.8713	14.3007	13.0761	15.5659	15.4318	15.7405	15.0625	16.9674	14.545	13.0712	12.5164
QRSL1	16.7209	16.4114	18.6126	18.1692	15.8244	17.2085	17.1964	17.0242	17.478	16.7101	16.5828	17.1561	17.1023	18.8415	16.7731	15.7037	15.6926	18.0022	15.4506	15.7369	15.0091	12.6948	16.0979	15.9106	16.6856	16.4104	16.786	16.7818	15.3022	16.0081	16.3863	15.8191	16.0853	16.5277	16.2072	15.8467	15.3366	15.7313	15.2036	15.1344	15.0272	17.0335	17.2243	16.79
RAB19	13.3499	16.9736	16.2828	19.0931	17.0742	15.9412	17.0593	16.1781	15.16	16.6401	16.3737	18.1092	17.3209	16.0711	15.9085	12.4814	15.4023	17.4516	12.3867	15.1249	14.0821	11.9919	10.9341	12.0168	16.9039	16.4467	15.9121	13.3058	15.914	11.6466	12.929	15.2209	15.5545	15.1699	15.4186	16.2323	15.1956	14.596	15.1254	14.2169	13.1257	14.5793	14.3761	13.6546
RAB1B	17.8101	18.2353	17.8747	19.6648	17.5274	17.829	18.2796	17.926	17.8409	17.6194	18.1386	19.0458	17.7811	18.3737	16.9728	17.0367	16.4809	16.2838	16.495	17.2846	16.9573	17.2979	16.7171	17.6836	17.5582	17.681	17.3751	17.9333	17.4651	17.3801	17.2702	18.3301	17.7993	17.632	17.0827	17.4366	17.4737	15.9408	16.8561	17.3936	16.813	17.2372	17.3346	18.6419
RAB23	17.1276	16.9195	17.8267	16.8316	16.7467	16.8644	17.1932	17.0931	17.3195	16.8414	16.8608	17.4142	17.4478	17.4128	15.1076	16.1799	15.9291	15.1818	17.9876	16.5733	16.4989	17.2509	16.2388	16.3769	16.1222	17.2924	17.3618	18.5914	16.3898	15.7312	18.0087	17.3237	16.5682	18.4503	17.9987	18.6001	15.6297	15.9971	15.971	15.508	15.7142	15.7762	16.098	16.5386
RAB3A	13.4214	15.0924	13.917	14.9502	13.4708	11.7375	14.1919	11.28	12.6833	12.4656	12.881	14.4622	13.6844	12.9232	12.6434	12.442	12.7948	13.5985	13.2919	10.9298	11.9116	14.46	14.153	13.2878	13.3435	11.7649	11.3019	10.9288	12.4998	12.5711	12.5457	11.333	11.3649	12.7566	12.6378	12.5863	10.8772	11.0869	10.1541	11.7925	11.929	12.4967	10.6335	12.7517
RAB9A	16.865	17.0439	16.3953	15.3569	17.0029	16.6541	17.216	16.2356	17.8649	16.8162	16.4813	17.2467	18.0278	16.1531	17.1263	15.577	15.3276	17.3839	15.0148	15.7472	15.7173	16.8543	15.6781	16.8316	16.8249	16.7087	16.0882	15.6942	16.4102	16.0196	15.5791	15.6776	15.8645	15.055	15.2652	14.4024	15.7752	15.8817	15.7465	16.4063	16.8565	16.4328	16.4387	17.9942
RABEP1	15.723	15.9977	16.5587	13.9919	15.7771	15.1039	15.6867	14.6372	15.4456	15.6426	15.777	16.4892	16.0588	16.1602	14.8361	13.7503	14.3551	15.4285	14.5547	15.23	14.4625	15.3642	14.8989	14.9031	14.8436	14.9217	15.3859	15.2447	15.3004	12.2075	15.1204	15.09	14.5142	15.2483	15.3667	15.5274	14.7966	14.8677	15.0826	14.3704	15.3967	15.1556	14.9608	16.475
RAI14	15.6885	14.85	16.6867	17.0199	15.4478	15.4271	15.2064	15.594	16.325	15.3741	14.5764	15.9837	16.3877	15.4269	14.6989	14.6882	14.7113	15.6804	15.6107	14.5281	14.9397	16.5208	14.8623	15.5909	14.6286	15.4764	15.1156	15.3371	14.6296	15.5507	16.3063	14.97	16.6584	16.0236	16.3301	16.4468	14.4503	15.1431	14.7108	14.6032	14.1234	13.5326	12.7798	14.4119
RALB	17.269	18.2421	17.7273	16.904	17.6069	16.9611	17.6418	17.2323	17.328	17.5656	17.3009	17.9131	17.4086	17.4157	17.175	17.3289	16.4559	16.3919	16.6989	16.8365	17.2451	17.5173	16.4436	17.268	16.8045	16.3072	16.4288	17.1915	16.5778	18.0394	17.1688	17.2748	17.1379	17.3422	16.8648	17.5642	17.002	16.3638	17.041	17.531	16.9998	15.8632	17.4552	17.7755
RANBP1	18.9374	19.3952	19.8507	19.9861	19.2892	18.8222	18.8578	18.375	17.3228	18.2529	18.819	17.737	19.6841	18.8943	18.7306	19.1692	18.8049	19.934	18.5978	17.8651	18.8988	17.3186	18.358	17.8717	18.6908	19.006	18.1573	18.1397	18.2355	18.0688	17.9271	18.0408	18.2654	17.8404	17.6928	18.5305	18.6895	18.6591	18.1757	17.834	19.3707	19.2073	19.8619	20.4132
RASA3	14.2346	14.8315	15.1316	15.9594	14.5292	12.9027	14.6975	13.6556	15.5073	14.7473	14.3541	15.9742	16.0764	14.6761	11.5696	13.7561	12.4236	15.204	14.2921	13.5499	13.5051	15.6049	13.201	14.5677	14.002	14.2081	13.9757	14.4767	10.2893	14.6517	14.5738	14.1611	14.7786	15.045	15.1393	14.9393	13.1427	12.159	13.0587	13.5637	11.8664	11.0899	13.2308	14.7155
RBBP5	15.5	14.6928	17.1872	17.6994	16.3281	14.6405	14.5339	15.4533	15.6665	15.2756	15.7707	15.0878	16.5159	15.5515	15.1396	15.5682	15.861	15.3977	15.1468	15.1208	15.2095	15.1046	14.7258	13.8134	14.4539	14.2918	15.9433	16.43	15.4029	14.7398	14.4012	13.8862	15.1427	14.7976	15.0163	14.8285	14.8796	15.3799	14.907	15.1477	16.2561	15.8496	15.2137	15.1884
RBM3	18.5141	17.7907	19.2403	19.1938	18.4885	18.1492	17.492	18.1788	16.6249	17.6122	17.3445	18.5646	18.8598	16.1321	17.4893	16.2992	17.8133	19.3567	17.1366	16.6532	17.4069	17.0301	16.7848	16.9913	17.9934	17.7936	17.7388	17.0087	17.0525	18.1369	18.3523	16.7493	18.3519	17.1338	17.0334	18.0526	17.4644	16.492	16.9068	19.2831	18.3728	18.6262	17.8473	14.9511
RBX1	17.0533	16.0106	17.5896	17.442	15.6397	16.6578	17.0545	16.6439	16.9174	15.7279	16.2135	17.0205	16.6792	16.493	15.5131	15.3422	15.7242	16.8079	15.8118	15.6069	16.1335	17.1454	15.0634	16.383	16.0524	15.4228	15.3833	17.2841	15.6327	16.1182	16.3851	16.3891	16.6388	16.032	16.6562	16.6043	15.5783	15.5872	16.5569	15.769	15.5217	15.5302	16.0959	16.1951
REEP4	14.9768	15.3513	16.1705	17.8267	15.3946	14.5477	16.0233	15.789	16.4956	15.7338	14.5908	14.6544	17.7147	14.5925	15.3917	12.9484	14.6534	12.9838	10.8636	14.7225	14.0138	13.9313	14.639	13.3025	15.1801	16.0632	15.8465	13.069	14.9924	11.4116	15.4957	15.7286	15.7044	12.4654	11.5026	12.1122	15.2147	14.2339	14.907	14.1435	14.2966	15.4312	15.2949	15.7575
RHOF	16.615	16.2382	16.6619	14.3113	12.3522	15.9065	11.0962	15.184	14.6353	14.2639	14.3322	13.7609	16.8704	15.6524	13.7932	15.5473	15.6996	17.653	14.492	13.5362	14.8874	11.9602	14.0392	12.2373	14.9196	12.0663	15.2424	13.0305	11.9873	15.5255	14.166	14.8826	14.8159	16.0983	15.7192	14.7754	14.1241	13.6373	14.3617	15.6231	15.514	15.1139	14.8387	16.4759
RHOT2	17.0434	17.7243	18.164	17.9876	17.0502	16.9462	17.8022	17.086	17.5742	17.5706	17.1601	18.2315	18.1131	16.8922	17.4504	16.1804	16.5508	18.7837	16.4661	16.3578	16.9205	16.9651	16.9511	17.2744	17.4261	17.0738	16.8967	16.6508	16.113	17.1178	17.1721	17.2017	17.5578	17.3595	16.5955	16.6502	16.5437	16.9808	16.7371	17.0397	17.2978	16.3623	17.6121	17.6281
RIC8A	17.1152	16.9499	16.6167	18.2846	16.1654	15.7628	15.9349	14.9389	15.2057	16.1534	16.0958	13.29	16.9057	16.1438	15.9558	16.237	15.1543	17.3467	15.6053	14.9096	14.7949	16.3006	15.0454	15.0573	15.5765	15.0962	15.5406	16.7254	14.8961	15.4684	16.1282	15.7235	14.614	15.0016	16.186	16.5655	14.8615	15.2837	14.865	15.357	15.8881	14.6529	15.4987	15.4155
RICTOR	14.1856	14.3465	15.7819	15.7367	14.1783	14.366	14.0341	14.4784	14.3403	14.2059	14.1263	14.4877	15.0562	13.9069	13.5127	13.6889	14.5729	15.3818	14.6047	13.4466	13.3127	13.5615	13.8283	15.3524	14.2662	14.3141	14.2367	14.1254	14.3539	15.1094	14.4626	13.464	14.179	14.6342	15.0525	14.9834	13.8669	13.035	12.7669	13.5201	14.8267	14.4463	14.2678	15.0794
RIPK3	16.3103	16.9354	16.4261	17.4506	16.3466	17.2442	16.7329	16.4078	16.0104	16.2999	16.2885	17.893	18.1127	16.5353	17.0782	16.5077	15.9722	18.4445	16.4781	14.7142	16.1092	14.879	15.7621	16.4163	16.2194	16.6907	16.4248	16.3553	14.3203	17.1857	15.9635	17.0895	16.1904	15.6158	16.425	12.6688	15.5043	15.0358	16.619	17.1003	13.9113	14.1932	15.9483	16.7626
RNASE2	14.691	14.0821	16.5232	13.8977	12.5977	13.2959	12.6744	12.7356	12.0477	16.4024	12.6069	14.6792	15.0467	12.3574	11.862	14.8695	12.4665	11.0797	10.9239	14.4563	13.2054	15.9233	12.5982	12.7492	12.2282	12.1005	13.4003	12.8869	12.6381	12.0759	12.1056	11.9155	12.7703	11.9141	12.3446	12.6351	13.7528	11.6109	14.0445	10.9846	10.6098	11.4768	12.5433	13.2569
RNF14	14.7671	13.931	14.3262	12.6187	14.0221	14.0436	13.8293	12.943	14.5854	14.795	13.936	14.7749	14.4121	14.0483	14.8006	13.7965	13.3723	14.191	13.0337	12.9067	11.8673	12.5628	13.4067	14.412	13.9293	13.5775	13.8032	13.1113	13.5259	13.1678	14.5536	14.7694	15.0296	14.7682	14.7971	15.7733	12.7248	12.6055	12.8559	12.2942	14.6539	14.1111	13.684	12.5231
ROCK2	17.3274	17.5105	17.8908	18.2101	17.2598	16.7525	17.0608	16.3154	17.2774	17.2325	17.1839	17.7675	17.9097	17.086	16.4175	17.0463	17.3419	17.6103	17.1967	17.0054	16.8327	17.4942	16.7063	16.5663	16.7118	16.614	17.3359	17.4756	17.3383	17.4227	16.9788	17.2754	16.6259	17.7395	17.2712	17.5499	16.7127	16.8293	16.704	17.0747	18.1815	16.6205	16.8333	18.6269
RPIA	17.9307	17.9281	17.5774	18.5911	17.4453	17.2769	17.9617	18.3078	17.9495	17.8721	17.0926	17.5275	18.1653	17.273	16.8733	15.0531	17.5703	17.5299	16.1812	16.4622	16.8339	17.0779	15.8826	20.1398	17.1059	17.9955	18.6221	18.7441	16.9102	17.6356	16.9955	15.793	15.6895	12.1932	12.9411	14.9262	16.5356	17.1485	16.9344	17.068	15.4792	16.0411	17.4796	13.2836
RRM2B	15.1241	12.7213	16.2246	16.6047	14.5472	15.4888	15.3887	14.7395	14.7086	14.3534	14.4157	14.2832	14.3864	15.6118	13.4581	13.7898	14.4385	15.0278	13.5037	13.8045	12.9833	13.6921	13.3376	16.1628	14.8469	15.4393	15.9149	15.4147	15.6044	12.097	13.6576	17.3564	15.1781	15.1653	14.9778	13.0999	13.3138	13.2134	13.3823	13.6147	15.2542	14.6548	15.0659	12.6851
RTN4	18.8086	17.9025	17.7855	19.1224	17.3302	16.5219	18.4242	17.4639	18.7903	17.7141	17.9266	17.6	16.7453	18.0061	17.5979	18.3725	18.1282	19.2024	19.2531	17.9089	17.6882	19.506	18.7745	16.6156	16.4866	16.7585	16.6094	19.0557	15.669	16.8883	17.6603	16.9399	17.1281	17.5772	17.0475	18.0613	17.837	17.3754	17.6995	18.0768	18.5273	15.4358	16.7501	18.6933
S100A10	19.5283	21.6821	20.3989	20.84	20.3934	21.2647	21.0463	20.2539	20.9122	20.7087	20.6969	21.0245	23.8458	19.5318	19.2921	18.1256	16.7619	19.4035	17.5745	19.3042	19.1518	18.9528	17.2903	20.2437	20.5938	19.5239	19.2005	19.4718	19.3621	21.118	20.1279	19.9165	20.4766	20.3941	19.7173	19.8841	18.7194	17.9899	17.9005	19.3752	19.8212	18.7283	18.3774	21.1673
S100A13	17.9362	18.3598	18.1836	19.7339	18.501	18.2823	19.549	18.1493	19.1209	18.8822	18.4548	19.2755	17.9825	18.4399	18.4312	18.2741	17.9598	18.4088	18.4522	18.4534	17.3141	19.7441	18.2012	18.4281	17.4214	17.8621	17.428	19.2168	18.2119	17.9923	19.4062	18.7503	19.6341	19.2111	19.4468	19.6837	17.8984	17.4424	18.3853	18.9109	16.8668	17.1187	14.6408	16.7889
SASH1	13.155	12.2574	14.1842	17.1144	11.6457	13.8676	14.0255	12.6233	12.9791	13.4491	12.4151	13.8016	14.0753	12.7412	11.4038	13.9215	13.2805	14.1296	13.861	11.4734	10.3853	13.0098	11.2452	13.0469	12.7688	13.0956	11.846	13.2511	12.7814	10.5205	11.7384	12.3449	13.4881	13.7842	11.9549	11.8787	12.1731	11.678	11.3054	11.7911	11.3121	11.7926	11.279	14.5898
SATB2	16.167	15.7575	15.5302	14.2568	17.1069	16.3555	17.3019	16.0242	15.7515	16.2281	15.6857	16.808	16.7134	15.9677	16.8614	14.594	15.4816	16.6446	11.427	15.7082	15.6663	14.028	15.632	14.5126	15.4137	14.0151	16.1864	16.2949	12.0998	15.0859	13.7333	15.7659	14.4461	15.727	15.2056	16.2049	14.9104	15.7137	14.6322	10.8518	15.0516	12.4612	11.7108	12.5074
SCAF8	15.1514	14.5041	14.9906	15.2572	14.1569	14.0317	14.3074	15.1335	14.351	14.6065	14.7437	16.6235	14.7539	14.3931	12.7857	14.2968	14.8193	13.6573	14.6476	13.9242	13.9166	14.3247	14.4475	14.0744	14.4604	13.916	14.1592	14.3345	14.7581	14.9052	14.6831	14.1618	14.5482	14.5814	14.4514	14.33	14.3097	13.9465	13.6427	13.2854	15.0814	15.0171	14.7107	14.7112
SCO1	17.5389	18.6643	17.2034	19.126	17.3277	18.5003	18.6383	18.5384	18.7563	18.2705	18.459	18.7194	16.6965	18.1952	18.4947	17.0707	16.1415	17.1516	17.5907	17.7921	17.5984	16.2701	17.4177	17.7476	17.8144	17.8666	17.8272	17.961	16.3757	16.9344	18.5301	18.2386	18.2521	17.7508	17.7596	18.5459	17.7322	18.4137	17.9961	17.9179	17.6607	18.0293	18.9364	16.8165
SCPEP1	16.9493	17.4019	18.4277	17.5583	16.3452	16.7933	18.1327	16.9839	17.2156	16.8429	16.2502	16.9492	17.3425	16.4175	15.2626	16.1809	15.7715	18.4992	16.7577	17.0288	16.3744	17.1724	16.7636	17.8011	15.4407	15.8594	16.2795	15.8795	15.8448	16.3464	15.7058	16.0658	15.9542	16.8089	17.1907	16.8389	15.9598	15.8197	16.3928	15.893	15.4397	16.0327	16.3277	17.3404
SDAD1	16.6083	13.9465	16.783	18.1147	16.3143	15.5462	14.6035	15.3268	16.0355	14.9862	15.8765	13.4965	17.7563	16.8684	15.1263	13.9699	15.5626	17.1518	14.2985	15.1285	14.3697	11.7844	15.7955	12.3469	15.394	15.0132	14.685	15.9615	14.9067	15.4945	14.576	13.0853	16.0422	15.2665	14.9003	13.5548	15.0111	15.0915	14.5064	14.232	15.4265	15.7016	15.9323	16.5181
SDE2	16.188	15.2491	16.5173	14.6907	15.1558	15.0757	15.5683	14.8348	16.4968	15.8275	14.6898	14.77	15.7567	14.6052	15.3583	14.4784	15.4556	13.2856	14.4611	13.8168	14.3926	13.9354	15.0735	13.9432	15.4842	14.7649	14.1244	14.5158	16.0088	13.4777	15.2278	14.0946	15.7016	12.9665	14.8426	14.9659	15.1088	14.3508	13.8124	14.5908	15.2129	15.7506	14.9448	15.7887
SDF4	16.7323	17.2989	17.2871	18.1196	16.6159	17.1466	16.5358	16.7295	16.5814	17.6416	16.3589	17.233	17.3287	16.9073	16.2091	16.7081	16.9157	16.5526	15.3631	16.3404	15.7814	17.0218	16.4267	14.8774	16.346	15.9744	16.441	15.2107	16.6668	16.3329	16.0921	16.8838	17.0569	16.345	15.9839	16.0545	15.7862	15.8389	16.3903	16.6111	16.9203	17.5544	16.0891	16.2774
SDHA	19.0889	20.4434	18.3308	21.0236	18.9198	19.6219	20.319	19.3753	19.5406	19.9429	19.8927	20.009	19.1509	20.0944	18.6708	19.2828	19.1271	19.1543	20.3621	20.2402	19.2736	18.569	18.8759	19.8843	19.2284	19.5662	19.6562	19.867	18.3031	19.6943	19.7819	19.9251	18.8772	19.8086	19.5305	20.1223	18.9866	19.5199	19.8057	19.1964	19.4916	20.0166	19.0971	18.9727
SDHB	18.4461	18.4586	17.7116	19.2666	17.4149	17.7864	18.4201	17.8661	18.1785	18.6795	18.414	19.0076	18.9457	18.5844	17.0111	17.5853	17.5083	18.4944	19.0255	17.8247	17.5983	17.9974	17.1774	18.1887	17.6134	17.5816	17.7466	17.7289	15.769	17.9674	18.0427	18.5576	18.0094	18.4002	18.0328	18.3879	16.9545	17.4632	17.9068	16.6971	16.9288	18.3405	17.161	17.4721
SDHC	14.7508	15.4638	14.4942	16.2516	14.4625	11.6909	17.6318	16.284	16.8372	15.9092	15.5219	15.8562	13.0965	12.9182	12.0156	11.2625	12.1177	12.6115	15.1194	14.5541	14.8894	13.9859	11.5192	13.0621	13.6441	14.1446	14.3401	12.9626	11.3394	13.1831	15.5463	15.7453	14.1007	17.003	14.5495	16.2222	14.4543	14.8894	15.3639	14.2529	11.9541	15.458	13.3513	12.6135
SDSL	16.7149	15.7148	15.6503	17.3123	15.5965	14.5173	16.8071	15.7574	11.9459	16.5597	15.5434	16.8357	18.2346	16.2739	14.7052	15.1696	14.6833	16.6388	15.5199	15.6426	14.4962	17.0401	16.4574	11.8281	14.2618	15.8129	16.3567	14.6949	15.477	14.0056	14.2516	15.1931	14.8869	16.0539	15.3684	16.1677	14.6545	14.8479	16.7307	14.6042	16.9292	15.9325	16.2113	17.4977
SEC11C	15.8594	13.9124	19.0195	14.6077	15.079	13.2976	17.1966	15.6379	18.5459	16.7042	16.0497	16.7132	20.1512	16.2534	13.4072	16.8942	13.0155	14.3618	11.1157	14.9568	15.7201	16.4444	14.6132	15.5941	13.936	14.4431	14.331	14.5277	13.7672	14.6509	15.3605	16.5114	15.7022	15.9706	15.9116	16.2458	16.5476	12.6895	16.6497	14.8138	12.7452	16.6348	13.9005	13.9087
SELENOI	14.9853	11.7453	16.089	15.4516	11.9505	10.972	13.8072	10.845	12.0735	11.7872	14.7952	13.9855	13.5332	12.1587	10.9265	12.2657	12.7107	15.0922	12.0898	10.3468	12.2505	12.7629	10.8727	13.2701	12.0225	12.3735	13.0484	13.1531	11.475	13.3911	11.3463	12.7449	10.3866	12.6603	11.9091	12.529	9.07565	10.1169	11.012	12.0114	11.5133	11.146	13.3835	12.685
SENP8	12.6204	13.2933	14.4013	14.0552	11.887	11.764	12.0557	10.8671	12.1273	12.368	13.1641	13.6912	12.4175	13.4905	9.34625	12.1502	9.3921	13.0777	10.9542	12.8305	10.8779	13.2539	10.7779	11.3206	12.2053	12.1564	11.4831	13.8036	11.2304	13.2017	12.1206	13.6173	12.5104	12.9704	12.1466	13.0458	11.7757	9.44433	10.2323	10.9655	12.5187	13.002	12.0209	13.5781
SERPINA4	15.1666	15.5023	14.7089	17.9721	13.1872	13.4763	12.7401	14.7763	13.2226	14.3705	13.3243	14.3385	15.5529	14.8814	11.9414	13.4376	15.4076	16.9084	16.5193	12.3773	15.1128	16.4547	14.7382	14.953	15.5079	16.5155	16.1381	16.603	15.6785	16.9778	15.4401	14.2105	16.0712	15.414	15.0078	16.4516	14.4673	13.1508	14.5898	14.0042	12.4539	11.4625	12.6437	13.8013
SERPINA6	11.6858	13.8357	13.5901	14.1911	13.4749	12.1683	11.8027	11.2197	12.3169	12.4669	13.0295	14.3603	15.6741	14.5884	13.2802	11.5285	12.2987	12.7815	11.2931	16.1599	13.9969	15.9881	12.4443	17.5052	13.3348	14.5267	13.0385	16.0897	14.8367	15.9058	13.0255	16.3377	12.7548	15.4132	13.0171	16.7243	14.8843	15.3511	15.9818	12.5876	12.3403	10.9559	11.5957	12.6626
SF3B5	15.9893	16.1967	17.9133	16.5611	16.6722	15.3552	15.9543	15.4459	16.7443	15.91	16.2323	16.6081	17.5748	15.8632	16.04	15.3139	14.5576	16.3082	14.2401	14.5157	14.9573	14.2802	15.308	16.6025	16.1437	15.7122	15.5337	16.9266	16.3937	16.5967	16.8966	15.7192	16.6523	13.3411	16.2766	15.128	14.7698	15.547	14.2848	14.3963	14.5995	16.6319	15.9215	16.1165
SFN	20.7927	20.5626	20.7759	20.9664	20.4383	21.2513	20.0737	20.5189	18.5139	19.7174	20.5558	20.1868	20.9672	20.5843	19.5933	19.7479	18.865	20.6376	19.776	19.6421	20.0242	16.255	19.6197	19.6417	20.7376	19.8912	19.3783	19.4403	20.0473	20.5141	19.5292	20.0324	20.4145	19.7248	18.6207	19.2541	19.0562	19.5836	19.9478	20.8429	19.8192	20.1523	20.2407	20.2127
SFT2D3	16.1488	16.3738	16.4637	17.2891	16.0719	15.4322	16.744	16.2232	15.6316	16.433	15.2671	17.0887	17.5045	16.3345	14.9751	15.8968	15.6011	16.9676	15.2892	14.9749	15.8775	13.8243	16.0637	15.3642	15.3757	15.2446	15.1888	14.9245	15.8352	15.7692	14.3267	15.988	15.7518	13.8744	14.1099	13.6916	15.5712	15.3591	15.7095	16.5222	16.5914	16.3309	16.0745	16.1708
SFXN4	16.71	15.7279	16.0759	18.0978	16.0989	15.527	17.0684	16.6274	17.0719	16.4529	16.5297	16.7569	16.2916	16.4287	16.9296	15.7603	15.1223	17.3086	16.8244	13.6802	15.4358	15.4756	16.1713	17.0666	16.3574	15.5844	15.558	16.6153	12.0424	14.0618	15.4168	14.3159	16.1084	15.3037	13.5533	15.6609	15.0282	14.9045	14.409	15.4675	16.0228	15.6395	16.4789	13.7921
SGK2	13.2086	12.0077	13.4322	15.3946	14.5847	13.5874	13.0864	11.7629	12.2884	13.2378	11.8091	13.6137	14.5472	11.6744	13.6835	11.6968	12.0625	13.5048	11.8575	13.13	11.0708	13.0534	11.9765	13.7196	13.7052	10.2875	10.8722	13.0027	12.3537	12.7132	11.7267	12.5333	12.2292	12.4786	9.24219	8.42911	12.6507	10.7864	13.0754	11.9901	9.13729	12.031	10.996	14.3148
SH3BP1	16.3683	16.2004	16.781	17.2796	16.7782	17.04	16.5811	16.3169	16.2267	16.9458	16.6523	16.9759	16.6222	16.3716	16.6177	16.4581	15.4399	16.2906	15.0731	16.202	15.3181	14.9683	15.9381	17.0161	16.5878	16.3106	16.061	16.2544	15.4709	16.3635	16.0323	16.748	16.63	16.3204	16.2197	16.353	16.0648	15.0719	16.0554	15.2472	15.6309	14.7621	15.3911	16.5097
SH3GLB2	17.679	17.2031	16.9213	18.0179	16.2919	18.0363	17.0099	17.9163	17.0232	17.4721	17.9976	19.7883	16.6159	18.5651	16.4272	16.9834	17.3404	17.9768	17.6813	16.4792	15.5552	16.7908	16.6942	16.9667	17.7708	16.8376	15.7332	17.55	16.8904	17.4766	17.6098	16.5589	16.655	16.7473	16.5215	17.6451	16.5028	16.2778	16.3401	16.3213	18.1996	16.9416	17.9833	18.8551
SHROOM3	13.7271	15.2346	14.2067	15.2036	13.2853	13.8774	14.3504	14.2171	12.3832	13.7538	13.1777	14.7638	15.1211	13.6471	12.0436	12.8646	13.8336	15.536	13.8826	11.4353	12.7068	13.0067	13.6647	12.57	13.4473	12.9898	13.2131	13.6435	13.2731	12.795	14.5489	14.2268	14.3284	13.6942	13.7609	13.1948	13.1655	12.5788	12.8825	13.1995	13.5403	15.0586	13.1055	15.091
SIN3A	17.0445	15.7817	18.1079	17.6342	17.0954	16.6621	17.2984	16.7867	17.334	16.5541	16.7218	16.4327	17.465	16.7374	16.9446	16.2711	16.2854	17.4778	16.3248	15.6464	16.105	16.0568	16.3978	16.4621	16.5111	16.6273	16.3244	18.4875	16.1678	16.6327	17.1156	16.1284	16.1338	16.1892	16.2659	16.8562	15.6353	15.3871	15.3214	16.2527	16.3599	17.0747	16.1656	16.8647
SIRPA	15.7177	15.1758	15.9519	17.2113	14.433	14.0163	14.9908	13.1719	14.26	14.8168	15.1806	15.5238	15.7532	15.5745	13.732	13.2874	12.8132	12.3041	13.5204	13.6268	13.5116	15.6693	12.9942	15.3722	13.2267	14.101	14.7695	14.4346	13.3493	14.714	14.0903	14.7791	13.243	14.9672	15.0297	12.391	12.9606	13.216	13.4435	11.786	11.4555	13.2249	12.5907	13.3689
SKIV2L	15.8666	16.6158	16.3829	17.207	15.6067	15.7001	16.1858	15.2319	16.0796	16.1634	16.0139	16.8293	16.9045	15.9769	15.484	15.2726	15.4787	14.5116	14.9248	15.3793	15.4026	15.7373	15.4528	15.9733	16.0332	15.6446	15.9512	16.2127	15.6571	15.3386	16.1259	16.2888	15.9694	16.2122	16.3757	16.1617	15.0787	15.3331	15.6108	15.1766	15.3462	13.7214	15.6434	16.7244
SLC20A2	14.0425	12.8766	15.4132	14.546	13.1845	14.6336	11.7404	11.9662	12.3828	12.8205	12.6264	13.7446	14.9287	13.377	13.1903	11.2888	14.508	15.3308	15.2493	11.2487	12.8534	14.8086	12.8026	11.0968	14.3737	13.0773	10.8978	12.1656	12.7012	11.2106	16.139	11.2054	11.4736	12.4573	12.918	12.7785	12.563	11.3294	14.0137	12.6213	12.7875	12.0783	14.371	15.2712
SLC25A22	17.3939	17.3025	17.2191	18.5048	17.1289	16.9318	18.0982	17.7491	17.8852	17.5518	17.3592	18.2869	17.0289	16.8649	17.5502	16.9758	16.3517	17.5144	16.853	16.1924	16.9179	16.746	17.0042	17.9116	15.2555	16.3203	16.0036	17.9085	14.336	17.0688	17.3683	16.5736	17.4501	17.2513	17.1407	17.3884	17.3256	17.139	16.9714	17.0961	17.3389	17.3481	19.0037	13.295
SLC25A3	18.2989	19.4418	20.0759	20.2037	18.5183	18.4381	19.4807	18.7548	19.5332	19.0384	19.4717	18.3666	20.3321	18.765	18.543	18.6105	18.1534	19.5706	19.3542	17.2059	17.9911	18.446	19.1469	18.228	18.2575	18.3329	18.11	19.0742	15.396	17.2553	18.2675	18.4397	17.858	18.1409	17.777	18.5131	18.2494	18.2265	18.1129	18.2936	19.0556	18.1879	18.9713	16.1686
SLC25A4	18.8636	18.8231	22.0619	21.9691	17.4905	18.2493	20.0949	19.0568	20.1887	19.5757	19.7637	19.7936	20.7552	20.1153	18.4242	19.1352	18.6397	21.1824	21.2946	18.8161	17.5601	20.2901	19.7806	19.5467	17.5243	18.523	19.2685	20.5122	14.811	17.4072	20.2214	18.6802	18.428	20.1543	19.2398	20.7193	18.8614	19.0015	18.6069	17.4707	21.5188	18.3116	17.84	15.4136
SLC27A2	15.3604	15.8224	15.3478	15.4568	16.2166	13.8081	15.2706	15.0986	13.9113	15.4413	15.3619	14.2461	13.8358	15.959	16.1307	15.7576	14.9167	16.4272	14.67	14.3144	14.3599	8.74621	15.3724	16.0292	14.8248	15.0001	15.7755	15.2459	12.8732	13.8464	14.861	14.2713	14.3588	14.3267	13.3577	12.8448	15.6738	14.3622	15.8687	14.7128	15.5228	15.9485	14.7023	13.2475
SLC27A4	15.5372	15.4351	16.6006	16.4168	15.2848	15.4814	16.0977	15.3176	16.2185	14.9834	15.0364	16.3532	16.4351	14.8798	15.5447	14.9446	15.3071	17.0621	15.0155	13.7272	14.5045	15.0231	14.7379	17.439	15.175	15.4155	13.7443	15.731	13.2243	15.5117	14.8373	15.15	14.7496	14.3789	14.0568	14.2059	14.9187	13.5482	14.686	14.819	15.4148	16.0102	16.113	15.4564
SLC30A1	14.888	15.5445	15.4817	19.1369	15.4493	14.721	15.1107	15.0763	15.1771	15.0862	14.2936	16.4551	15.623	14.8563	14.1506	14.6053	13.6525	15.4575	14.0839	14.1413	13.8893	13.4121	14.2654	13.7344	14.2625	13.7645	13.0337	14.5311	13.037	14.4666	14.9783	15.4152	15.548	14.7522	15.7528	13.9434	15.3833	13.8436	14.5211	13.4316	15.4325	15.9314	14.8911	17.1784
SLFN5	15.7602	15.5001	16.2505	19.3257	16.2176	16.0665	14.9366	16.1439	17.1608	15.523	16.2955	18.5645	15.2508	15.5304	14.6898	15.8507	15.4696	15.8703	14.8445	14.9514	15.7196	16.8769	14.8485	16.1469	14.9489	15.4515	14.5423	15.7916	15.5348	12.1587	15.7565	15.7493	16.3028	15.9851	16.694	16.3624	15.822	15.3255	15.6154	15.0965	16.7776	14.8953	14.8955	15.9637
SLK	17.8372	18.1892	17.8497	18.5079	17.6982	17.4253	17.5369	17.2849	17.3438	17.3867	17.2525	17.907	18.1075	17.5747	17.4613	16.8345	16.5481	17.8259	17.1587	16.7299	16.7364	17.4931	16.4051	17.4459	17.2782	17.1825	16.9851	17.3002	17.0559	17.2872	17.4128	17.2872	17.2199	17.8285	17.4828	18.0858	16.5376	15.851	16.758	16.8486	17.1772	16.8588	15.9422	18.9745
SLU7	15.2911	17.0562	16.9226	17.0258	15.9667	14.5276	14.8053	14.4935	14.9655	14.7024	14.8098	15.2774	19.2759	15.3286	15.1002	12.9696	14.3763	16.7072	13.7152	12.7017	12.447	13.2021	15.2638	14.7832	14.905	14.5478	13.0159	13.1146	14.372	14.2897	14.0354	14.8633	14.6324	14.7665	14.8892	14.2603	14.3763	13.7624	14.8136	13.7803	13.8658	15.078	14.6247	14.2925
SMARCC2	16.2041	15.9022	17.6433	17.5791	16.5361	16.3412	16.9383	16.1473	16.7462	16.5187	16.439	16.7584	17.6711	16.635	16.2873	16.8115	16.6051	18.2949	16.7048	16.6609	16.4288	17.2416	16.8489	15.7395	16.0563	15.8387	16.0099	16.5579	16.3004	16.5325	16.9972	16.7407	17.2061	16.8027	16.9428	17.2049	16.199	17.1824	16.2897	16.3827	16.6675	16.5465	16.131	16.6815
SMPDL3B	15.7605	15.3694	17.3861	15.0801	15.0641	13.4447	13.9233	14.3598	14.3256	14.0957	15.0181	14.0534	15.89	14.2977	6.2591	13.7458	11.21	14.3579	14.1198	14.3397	13.168	11.8008	13.3085	13.3081	11.007	12.2391	6.38952	13.0934	10.9346	13.0047	10.4635	14.1273	12.8027	13.9274	11.3242	12.5762	13.2268	12.524	11.206	12.0072	14.8687	11.0486	15.2415	12.2675
SNRPF	18.2678	17.2258	22.4662	19.446	18.7095	17.8241	16.3167	16.489	15.3815	18.6717	18.8245	14.2008	19.5656	17.7936	18.2866	13.6328	16.6663	18.247	16.2129	15.6933	16.237	14.2712	15.8577	17.5171	17.0152	16.328	16.7686	18.0054	15.7962	18.3087	16.9046	18.1623	16.3495	15.6228	17.2697	17.2808	15.6849	16.8543	15.5232	16.639	17.1082	18.2486	17.3574	17.6117
SNX1	17.3941	17.1829	17.9681	18.9905	17.1955	17.812	17.8931	17.659	17.6634	17.4736	17.2844	17.6763	19.6488	17.4365	16.8336	17.0689	17.0799	18.1203	17.1206	17.2811	16.7871	17.7215	16.6761	17.5968	17.1161	17.4374	16.7473	17.5694	17.0747	17.0665	17.8046	17.8478	17.9209	17.3966	17.4654	17.8038	16.7656	17.1461	17.0364	17.2448	17.5738	17.5951	16.3635	17.6591
SNX11	14.8565	15.6723	14.5812	13.7023	12.6	15.163	11.3273	15.4583	14.2061	16.4088	14.3006	14.8893	15.737	14.287	13.1271	14.7595	14.5619	12.9654	13.8419	12.106	12.3845	11.9297	13.793	13.0178	11.8611	11.0586	11.138	13.082	14.1083	12.6388	16.0162	14.0802	14.177	13.1516	14.5775	12.3897	14.0932	14.6648	14.0435	12.1577	14.911	15.0565	15.2184	16.072
SNX15	16.0405	15.1058	16.5991	16.735	15.0529	15.5216	15.0255	14.6744	14.5258	15.9541	15.5292	16.4912	16.1711	15.3448	14.5996	13.5193	13.5103	15.6893	13.5097	14.6735	13.5979	14.2277	13.5287	14.6853	15.5681	15.117	15.0539	15.195	14.528	14.7437	14.0937	13.8225	11.9878	15.0333	13.4296	16.0879	14.0469	13.9565	13.4792	14.1804	14.3284	13.752	13.6481	14.6747
SNX2	16.8316	16.8987	16.9286	16.8892	16.4395	17.0413	16.7624	16.7355	16.5064	17.0754	16.949	16.4374	17.0899	17.5719	16.0823	16.1171	16.391	16.9263	16.257	17.0487	16.5009	16.6209	16.4136	17.3839	16.0653	15.7359	16.0123	16.736	16.4166	16.5846	17.0409	17.107	16.5127	16.9571	16.5891	17.3904	16.6953	16.3734	16.6544	16.4624	16.4402	16.908	16.5187	17.7667
SOD1	16.901	16.7238	18.8939	18.4998	17.3542	17.4274	16.2836	16.1682	16.7895	16.2144	16.626	17.6197	18.8098	17.4148	15.5112	15.9688	15.4459	16.3814	15.5768	14.5991	14.5931	16.566	14.707	17.4096	15.8911	15.8488	15.3614	17.0474	16.3893	16.8868	16.6046	16.0659	16.5512	17.2973	16.3261	17.3804	14.9351	13.8773	14.5101	14.127	17.8023	15.3374	15.9552	17.6198
SOX9	14.8118	13.5045	14.7648	17.8472	14.2265	14.0558	11.2433	14.0373	16.2186	12.03	15.6478	13.8809	13.6927	13.3177	14.8033	14.7034	13.4764	16.1018	14.4394	11.4883	12.4524	14.767	13.4219	13.1106	14.8971	14.9083	14.9806	13.2938	14.419	15.8884	14.1594	13.0233	14.0159	14.0325	14.7363	13.3715	12.4934	16.1186	11.0558	12.4365	15.4126	14.8285	14.3462	15.9239
SPAG9	16.3581	16.5534	16.906	17.0587	16.2084	16.2598	15.985	15.9304	15.7585	16.0854	16.0374	16.5839	16.8065	16.2179	16.1008	15.3726	16.2205	16.4939	15.4288	15.2117	15.4185	15.7776	15.3086	16.1082	15.9351	15.9757	16.0622	15.9001	15.7808	16.2595	16.3982	15.9967	16.0555	16.6268	16.0954	15.9226	15.4867	15.5461	15.56	15.7339	15.6212	15.5826	15.6034	17.8916
SPECC1	16.2736	16.659	17.5011	17.1504	15.7681	15.4878	16.0677	15.9158	15.4361	15.5272	15.5852	14.2024	16.2422	15.873	14.7276	14.5023	14.2003	16.0322	14.9863	15.1586	14.8597	16.2969	14.9375	16.6038	15.4019	15.7218	14.7253	12.235	15.1807	14.9417	15.4799	15.7082	15.6988	15.8922	15.4365	15.0002	14.4264	13.7109	14.3937	14.0741	14.3285	14.4243	14.6664	15.9803
SPECC1L	14.891	14.5217	15.3579	17.4522	14.5554	13.4846	14.9211	14.667	14.9631	14.3302	14.8749	14.6387	15.0026	14.7859	14.3654	13.5368	13.2426	14.5659	13.804	13.2644	13.9866	14.7212	13.951	14.8749	14.991	14.5843	14.6698	14.9645	13.6685	15.001	15.4596	15.0173	15.1372	14.933	14.6363	15.4972	13.557	13.9282	13.8467	13.5128	13.9391	14.0456	13.9791	15.534
SPG7	14.7099	13.5691	15.5572	18.1768	14.7832	15.667	16.6961	15.1657	16.1013	15.8947	15.7247	18.1135	14.9167	16.0078	15.6155	14.3047	14.6745	15.2348	14.0921	14.6136	13.8532	15.6197	13.9194	13.247	15.7007	16.2	15.4625	12.4519	12.2571	13.8438	14.9357	14.5899	15.3365	13.5354	14.5984	11.5231	13.7678	14.5838	14.256	14.9287	15.4489	14.7144	15.8575	14.4558
SPTLC2	16.4373	16.6688	16.8075	17.3464	15.7537	16.148	16.2769	16.3419	16.0458	16.4333	15.5981	17.821	16.9885	16.0751	15.7767	16.2517	15.6453	18.3351	14.8063	15.1215	15.5095	14.5266	15.0193	18.1794	16.1222	16.0727	16.1587	16.3427	15.7661	17.1357	15.5753	15.6387	15.0603	14.9461	15.1226	15.203	15.4602	15.8881	14.9131	15.8183	16.2581	17.0968	15.6188	16.3488
SRC	17.7576	16.3689	18.6121	19.5185	17.7137	15.8975	16.01	15.8657	15.9148	16.0721	17.5618	17.7466	18.8518	17.6624	16.3298	16.8168	16.7996	17.4989	16.5078	16.7039	16.5739	16.676	16.7914	14.4189	16.4471	15.9352	15.7574	17.0328	16.0771	16.448	16.3859	15.8632	16.1458	16.9053	15.2054	16.9402	16.5136	16.3113	16.3232	16.631	15.9156	15.5544	16.4762	15.7135
SRP54	15.9924	16.1628	16.4517	16.3075	15.4925	15.0431	15.7724	15.748	16.0961	15.639	15.6021	16.3973	16.3139	15.2303	15.3683	15.6386	15.566	16.8913	15.1191	14.8188	15.2161	15.7609	15.7155	15.2895	15.4309	15.021	15.5592	15.3672	15.7693	15.4189	15.0299	15.902	15.0221	15.5215	15.1562	15.5289	15.3792	15.3535	15.2958	15.411	15.4881	15.9834	15.9096	16.8255
SRP9	20.1021	18.6289	21.1148	22.7153	20.5649	20.4486	20.802	20.5288	20.8119	20.1456	20.2215	19.7987	20.8909	19.3784	20.4811	19.4897	19.6886	20.6389	19.8556	19.4649	19.7021	20.2069	20.1522	19.5908	19.6266	19.9172	19.2023	19.3001	19.4091	19.8094	20.2178	19.661	20.4058	19.8401	19.9474	19.8078	20.1846	20.5617	19.5104	19.6956	19.6358	20.2822	19.2897	19.0514
SRSF7	19.6175	18.6227	21.6352	20.5113	20.09	19.0062	18.9185	19.5569	19.489	18.639	19.8927	19.4977	21.0491	19.5522	16.9737	20.8377	20.0751	21.2328	20.0264	19.1873	19.7646	19.9636	19.7654	19.5244	18.4775	18.3987	18.0693	18.9311	19.1098	18.7665	18.594	18.3805	18.8688	19.0411	19.0257	18.9457	19.4467	20.0588	19.0898	19.888	20.4214	19.307	19.3041	18.3663
SRSF8	13.9448	13.3208	14.5354	15.2233	14.588	14.2522	12.1795	13.2316	12.4456	13.9572	14.5508	14.024	13.7828	12.4084	13.2897	13.0928	13.3208	14.027	13.6851	12.4107	14.837	11.8755	14.2968	13.5271	11.7492	14.2819	14.0314	12.3222	14.0147	13.8123	13.9568	12.1912	14.433	13.0399	12.6979	13.5401	14.2293	15.6675	13.4976	13.7431	14.6571	16.401	16.2855	15.7719
ST14	16.2108	16.6946	17.3265	17.3585	16.773	16.755	16.3246	15.6668	14.3187	17.2158	16.8641	17.3688	17.1892	16.7023	16.0837	16.1524	15.5402	17.1683	16.0084	17.2724	16.9365	16.9274	17.0494	12.0598	15.6513	16.7658	15.6974	15.7271	16.5038	15.7358	15.4791	16.9491	16.8871	17.0401	16.1801	16.7862	17.5476	17.6653	17.0502	17.1491	15.46	16.1635	15.0021	15.9453
STAM2	15.7227	15.4719	17.6209	14.5044	16.1679	14.6896	15.9176	15.449	15.0674	15.7881	15.7511	17.8889	16.4948	15.7783	15.0688	15.8924	15.1818	15.2514	10.8894	14.7506	14.5889	11.0675	11.873	12.0831	14.9985	14.7482	12.3252	15.1576	15.5846	13.549	15.8165	15.6311	15.5508	14.1224	13.9133	16.6739	13.9772	14.3051	14.7739	14.143	14.9688	14.2397	14.6678	14.331
STOM	19.0221	19.1619	19.1569	17.9163	17.6605	19.0412	19.5215	18.5258	19.486	19.0701	18.4406	19.2108	18.4121	18.6853	17.0913	17.7308	17.0006	18.5281	17.5148	18.0905	18.0595	19.6689	16.9646	18.9835	17.155	17.5213	17.7786	18.8802	14.8234	18.4745	18.5761	17.4687	17.3993	17.9269	18.4269	18.8284	17.6445	17.1899	18.0234	17.0709	16.7559	14.1668	12.3023	12.9259
STRN3	15.8359	15.6431	17.0933	16.8284	15.8329	14.9913	15.5627	15.4206	15.8483	15.9973	15.6219	16.4109	16.2552	15.5705	15.5504	14.2368	15.3784	15.9629	15.4827	15.2162	14.93	15.8598	14.998	15.9037	14.6979	15.3247	15.559	15.7827	15.6486	16.1042	15.7417	15.2122	15.2743	15.7163	16.408	16.5858	14.9425	15.5525	15.076	14.915	16.2873	15.2613	14.5558	15.6456
SUGP1	15.7474	14.2372	16.4313	15.2729	15.1536	14.3118	14.9334	15.5022	15.5098	15.0236	14.9322	13.4032	15.8469	14.9575	14.7563	13.9268	14.7959	15.6361	13.3979	13.637	13.6762	12.2135	14.0907	13.154	15.0634	14.2276	14.0784	13.314	14.3614	11.3406	14.641	14.7234	15.1442	12.6619	14.8802	12.2352	13.9199	14.5229	13.886	12.6858	14.9471	15.1278	14.5324	15.6384
SUPV3L1	16.5086	16.2261	17.0495	18.184	16.7476	15.7809	16.6549	16.7524	16.5705	16.2282	16.737	17.0136	17.8134	16.8573	16.185	16.132	15.3221	17.0214	16.5613	15.7868	15.7228	15.4116	16.4128	15.264	16.6708	16.2865	16.6137	16.5145	14.5506	15.6174	16.3832	15.7123	15.8981	16.3591	15.8757	15.6706	15.6263	16.4207	15.5399	15.5633	16.5884	16.5929	15.9703	15.4308
SYNE1	17.7626	17.7473	16.9182	14.3842	16.9323	12.122	12.9701	11.8791	17.1942	17.6654	18.7315	13.8514	16.9555	19.5013	17.5043	18.1449	13.3443	13.8283	14.9756	16.1656	11.9339	12.3794	16.3009	12.531	12.5389	16.5597	16.5415	12.2762	17.3496	12.3616	12.6731	12.5325	12.4009	12.5164	12.116	13.2572	17.2041	16.8983	16.0646	16.4001	17.0944	15.7807	11.6229	17.394
SYNPO	16.3837	12.8991	16.9911	17.516	15.6738	16.4659	15.0497	15.4625	16.108	16.4376	15.632	15.4864	16.6235	16.1658	14.8087	15.9248	16.4295	15.6505	17.6886	15.9281	15.4595	16.5153	15.8522	15.1351	14.9086	15.681	15.7201	16.3374	15.3855	15.5184	16.8241	14.9927	16.3187	15.8745	16.5066	16.3867	15.4519	15.67	16.1987	15.6681	11.8556	10.6941	11.2479	14.1129
SYTL2	15.2119	15.5186	14.2483	14.6887	14.585	14.5997	15.2079	13.9394	14.9368	15.8601	15.0933	17.3494	16.7734	16.0428	14.1141	14.8866	13.9254	15.3844	14.8236	14.8507	14.719	15.0988	15.4596	14.9409	13.0458	15.4084	15.3673	14.3365	14.9618	13.3006	14.6663	16.145	15.3174	15.5358	14.6841	15.3267	15.3784	13.6826	15.0318	14.8195	13.3186	13.6348	13.7474	14.3777
TACO1	16.0639	16.7712	17.3665	15.7664	16.2697	16.2622	16.2525	15.9223	15.4738	16.5393	16.0219	13.9899	16.6642	15.8281	16.6156	16.1164	16.2623	15.4798	15.8286	16.346	15.3454	14.4627	15.0126	15.6581	16.4013	16.534	16.5642	15.7959	16.2457	15.062	16.9136	15.9658	15.9993	17.1179	16.9758	16.8076	16.0723	17.1356	16.578	16.5546	17.3136	17.2451	17.9644	16.8377
TAF9	15.8708	16.0358	16.1202	17.2841	15.0192	16.1926	15.2679	15.4676	15.9428	15.926	15.2487	15.3709	16.9822	15.1324	15.9942	16.5283	14.3243	17.9749	15.9693	14.4212	14.8517	15.2291	15.2611	15.357	15.892	15.3774	15.9871	15.605	16.482	15.376	15.7455	15.0591	14.6946	13.189	15.0862	13.9071	14.3344	15.3231	14.4651	14.8876	14.9494	15.991	15.1657	16.5263
TAOK3	14.7425	14.586	15.0097	16.2182	14.1807	15.0951	14.6705	14.5014	14.4114	15.3803	14.9922	15.4127	15.6829	15.0093	13.8922	14.4339	14.1859	15.1593	14.7579	13.8733	13.2032	13.9306	14.0493	14.0716	14.3863	14.3015	13.6908	15.1244	14.305	14.309	15.3494	15.4235	14.9284	15.1555	15.4808	15.13	13.6992	13.5847	13.8912	14.0736	14.1861	14.1497	14.2478	15.7806
TATDN3	13.881	12.5617	14.2023	18.2051	12.4781	13.9529	15.0413	14.5294	11.6473	14.6009	20.2743	13.6702	13.1014	18.4159	11.4203	12.8686	10.5005	13.287	13.3408	11.4579	11.6144	13.2255	11.9058	12.6934	11.9234	11.8855	12.1234	12.919	16.5838	12.268	20.6938	19.7686	12.1923	14.6985	12.8688	14.64	12.2122	12.6245	12.3798	12.1959	15.2456	14.9714	20.8565	13.3195
TBC1D10C	15.4512	13.7791	13.9395	14.1525	13.922	13.9335	14.2396	15.0326	15.3426	14.7593	14.1014	14.2764	14.7774	15.0446	12.302	15.5106	14.5057	14.1812	13.4165	14.5658	13.9768	14.214	14.1378	15.9479	12.9761	13.9461	13.1941	14.2212	14.189	14.1673	14.9067	15.0137	15.2754	14.3594	14.6767	15.0314	15.0212	12.9931	14.9199	14.8441	12.87	10.7005	11.5193	14.2158
TBC1D15	17.6664	17.2917	17.4372	18.4827	16.3949	16.7842	16.5852	16.8436	16.5086	16.7392	16.7221	18.6643	18.1484	17.3715	16.8992	16.7428	16.6502	17.7175	17.1973	16.2231	16.8574	17.7493	16.394	16.5852	17.0404	17.4447	17.4863	17.0112	16.6564	17.0096	16.961	16.4945	16.5927	16.4356	16.9323	16.791	15.9678	16.5446	17.1791	17.1407	16.819	17.594	16.3494	17.3737
TBC1D2B	17.9805	17.6014	17.9235	19.4252	17.5558	16.8237	16.9853	17.4994	17.9489	16.9541	17.5154	17.2157	17.6321	17.7142	16.5221	16.5432	16.7342	18.8007	16.576	16.0491	16.1946	17.6971	16.9041	18.1794	16.7906	17.0324	16.5668	17.1085	16.4533	16.756	17.2795	16.9571	17.1626	15.6617	17.2569	16.4712	16.7268	16.4837	16.3943	16.1121	16.082	16.3526	17.0145	16.7041
TBCE	16.7777	16.6841	17.82	18.9399	16.7385	15.3759	14.9435	16.4032	15.8554	16.0357	16.0672	16.6231	17.8148	16.1512	16.3168	15.5771	16.2138	15.9739	15.1686	15.9764	15.9	15.4435	16.1286	15.5657	15.8897	15.6517	15.6236	15.8507	15.5635	16.166	15.7482	15.3846	15.7896	16.3975	15.9217	15.4358	15.3298	16.3885	16.0705	15.6537	17.1948	16.1446	16.461	17.354
TBCEL	14.6532	13.8623	15.3727	15.7541	14.4428	14.8483	14.3532	13.9138	14.338	13.686	13.6916	14.2534	15.4566	14.5362	11.7693	11.668	12.316	15.04	13.748	13.7611	13.9962	11.7825	14.7233	15.0615	12.257	14.316	14.0518	14.7173	13.774	13.2121	14.8042	14.6291	14.0805	15.7673	14.8503	16.3604	13.0532	10.4556	12.7017	11.4743	11.8088	13.4552	12.5055	12.6134
TBK1	16.085	15.8294	16.4285	17.6436	15.6988	15.5817	15.5981	15.016	15.677	15.5627	15.8108	16.4841	16.1439	16.2012	15.7157	14.9602	15.2811	16.4466	15.1507	15.6561	15.1314	16.4132	15.6343	15.2528	15.2692	15.2537	15.4604	16.4652	15.1142	15.9172	15.6481	15.624	15.5112	15.886	15.9596	16.0659	15.2743	15.3864	15.3394	15.5982	15.6518	15.1629	15.3386	16.6988
TDRD3	14.4985	12.8492	14.7881	15.4743	14.9951	14.5646	14.6363	14.4792	14.5855	14.7364	14.411	15.8305	14.61	14.557	15.1448	13.0955	13.8872	16.2059	14.3058	13.4149	13.6217	13.6003	14.0362	14.5943	14.767	14.5999	14.2058	14.0812	14.4553	15.0311	14.1741	14.4751	14.7561	13.9167	14.3628	14.548	13.7363	13.8581	13.7366	12.4677	13.4219	14.377	14.0253	15.3594
TDRKH	12.8103	17.0673	14.7838	14.8976	14.4119	14.127	12.617	12.481	12.5274	12.9481	13.9147	14.1804	13.5421	14.2254	14.6033	12.8317	12.2628	13.3438	12.7066	11.9052	12.9375	11.9494	12.7116	12.5259	14.1994	14.738	14.5292	14.4791	13.2675	12.1232	13.6515	13.5128	13.0661	13.7885	11.8369	12.2189	12.7813	13.6222	12.2722	13.2457	14.2964	14.8307	15.045	15.5135
TERF2	15.129	14.1033	16.694	15.6399	14.9375	14.2741	15.8805	15.3257	15.6839	14.4865	14.3722	14.496	16.4379	15.0846	15.0539	14.0982	14.3476	15.4422	13.5265	14.3231	13.7736	15.5246	13.4123	13.4538	14.5969	13.5517	13.9625	18.0255	14.1795	12.3506	15.1183	14.427	14.8073	14.3585	14.9068	15.3642	13.1811	14.6422	14.033	13.7711	15.352	15.2514	15.1987	15.9169
TERF2IP	15.5669	16.0929	17.9317	16.9196	14.894	15.1965	15.689	15.869	15.9771	15.8285	15.1697	17.3054	17.0923	15.6232	15.2192	15.3298	14.5754	16.0221	15.6317	14.7145	14.8084	15.72	14.9048	14.9254	15.1852	15.2761	14.9304	14.7231	15.2066	16.1369	15.7129	15.7092	16.2748	15.9279	14.971	15.4116	14.6506	14.9318	14.5087	14.4549	15.4806	15.623	15.9794	16.3113
THSD4	16.9828	13.8016	17.2878	17.1588	15.4142	11.9827	16.2854	15.1265	16.9704	16.3699	15.7886	16.2628	17.2897	16.4258	12.524	15.6293	15.4782	15.3879	16.9633	14.9187	15.8704	15.5176	15.343	15.5514	13.0397	14.5622	15.0791	15.4615	14.4297	15.5545	16.7994	15.0279	17.2858	15.8936	16.0179	15.424	15.1595	15.1982	16.2535	14.3169	10.9882	11.3736	12.7207	12.8722
THYN1	15.5264	15.1336	16.23	17.4747	15.6541	15.394	16.0765	16.0649	16.3669	16.4172	15.9693	16.3977	16.9135	15.5198	15.0258	16.4164	15.8486	17.5219	16.7843	16.1131	16.1429	16.502	16.1459	16.708	15.2972	15.7236	15.174	15.9668	15.74	15.9297	16.0433	16.0911	15.7148	15.8297	15.8828	16.4087	16.1681	16.4907	15.7772	15.52	17.2725	16.047	16.1382	16.7023
TIA1	18.0061	17.2637	19.0814	19.0737	18.8553	19.279	17.9602	18.577	18.7696	17.3071	18.628	18.3863	19.319	17.291	17.4813	18.2729	18.4217	18.8905	18.2894	17.6184	17.9832	18.6971	18.5406	17.9686	17.7871	17.7301	17.5055	17.6446	17.4304	17.6554	17.7869	17.9632	18.7854	17.7223	17.8057	18.287	18.0349	18.7699	17.913	18.3431	18.7797	19.0075	18.2007	18.2472
TIAL1	18.1999	17.097	21.0993	18.4292	18.9092	18.2327	17.128	17.2201	17.6126	16.9179	18.3083	17.0323	20.635	17.8458	16.4259	16.1602	14.7431	12.9072	14.7108	15.9825	16.1656	17.4048	16.8204	16.5468	17.8939	17.0932	16.8071	16.2647	15.7207	16.7675	16.7538	17.2647	17.5915	16.0638	16.609	16.3322	17.2238	17.1112	16.2413	16.3634	17.8746	17.4082	16.5376	15.7692
TMA16	14.7411	15.567	17.7127	17.6915	15.2748	14.6118	15.9628	16.1816	15.4869	16.4425	15.6811	16.0068	17.9865	14.9849	14.3382	15.3881	15.893	16.866	15.3168	15.9555	14.8802	12.1741	11.9655	14.0832	15.666	15.6263	14.373	16.4825	15.4744	14.0595	14.7971	14.2395	14.8055	15.6151	13.9424	13.6118	15.8787	14.9826	15.3642	14.6265	15.2104	16.5821	14.797	16.3555
TMEM209	15.3945	12.8102	16.1296	16.005	15.16	13.6396	15.0936	14.3062	15.3109	14.8147	15.2032	13.3627	15.5168	15.8539	14.9008	14.6876	15.0204	16.7836	15.1754	13.5838	15.4427	15.6372	15.3871	13.9051	15.0366	14.314	13.6416	12.4054	13.2606	14.9037	15.3376	14.7425	15.3747	14.6495	14.9761	15.0475	14.9653	14.2606	14.6149	14.6955	14.7279	15.4069	15.8948	15.5912
TMEM223	13.6341	18.0821	16.3658	16.9763	16.1321	16.2949	16.5845	16.902	16.8536	17.3697	15.9873	13.779	13.5867	13.4551	15.3647	15.5628	13.9348	18.1662	15.2584	13.9077	14.8363	14.3588	15.9056	13.1273	15.8435	16.4201	15.6228	15.6626	11.1897	14.0889	15.6568	15.796	17.0432	15.8113	12.7026	12.9145	15.9435	15.0257	15.1438	15.6387	15.4519	16.1943	17.0313	12.9106
TMEM230	18.3428	17.2188	18.3068	14.6187	17.0016	15.8742	12.7357	12.105	17.0783	15.3822	17.2297	13.9673	21.0409	19.545	16.6023	19.5231	17.4729	18.1085	19.7634	17.047	18.4986	19.2218	18.6464	13.6804	12.0517	12.0716	12.1881	15.3738	16.9382	11.9831	16.0632	15.5033	12.7002	11.9913	11.762	16.2192	18.6671	19.0903	18.6932	19.5011	17.5411	17.6123	16.8234	19.098
TOM1L1	14.7177	14.5753	13.8456	18.3375	14.8151	15.173	15.2015	14.9079	13.998	15.2403	14.927	15.0762	15.8481	14.3035	15.0908	13.5482	13.3513	17.1081	10.2666	14.6974	13.8753	11.644	12.8802	13.5655	15.2199	15.0985	12.9871	14.7728	14.689	15.6512	14.5702	15.3649	14.9465	12.6848	15.0261	15.1474	13.4281	14.757	13.6443	13.9577	16.2292	16.168	14.889	15.6636
TOMM20	16.6648	17.1624	14.724	17.1319	17.9588	15.8811	16.2582	16.586	16.2783	17.2734	17.4452	12.8362	16.402	16.4415	14.1552	16.5451	13.9757	18.3922	15.2773	12.166	15.7043	18.3682	15.5577	14.766	15.6142	15.5852	15.5025	16.8357	14.9461	16.3439	16.7649	17.1927	16.4415	15.3774	15.8349	15.5895	15.2892	15.9779	15.4613	12.5491	14.2965	17.0071	16.8956	18.1346
TOMM40	17.1924	18.9616	18.4181	16.2439	19.1573	18.3467	19.4562	18.3114	19.2032	18.2169	18.2096	19.316	17.5675	17.5883	19.7986	16.8744	17.0687	19.1974	16.7314	16.6138	18.0614	16.7451	17.777	16.7706	18.1693	18.1953	17.6883	18.4801	11.6325	17.4219	17.6295	17.1517	17.5768	16.7144	16.2305	16.8003	16.964	17.5165	17.0074	18.3031	17.679	17.1914	18.9338	13.8693
TPD52	18.105	17.7519	17.8453	19.1228	18.8153	17.8471	17.6649	16.4689	16.6328	17.299	18.652	18.0903	20.4508	18.6458	16.4685	15.7757	14.9105	16.3141	15.4784	16.0643	16.5406	13.758	15.6352	15.9645	17.3317	16.9746	17.325	16.4327	17.2272	16.7513	17.2547	18.2284	16.7106	16.6009	16.672	17.3755	16.4733	14.5865	16.4815	16.2875	14.1833	15.7608	17.6327	18.309
TRAF3IP3	15.3815	16.0446	15.0424	15.4062	14.4945	12.9056	14.5104	14.1547	15.4446	14.781	13.9044	15.797	15.7774	14.6663	11.0232	14.0948	12.633	13.5813	12.4432	13.1273	13.9199	15.6356	14.3934	13.4094	10.9843	12.7425	12.6845	13.1275	12.0611	12.0197	14.4723	14.5798	14.9812	14.3165	14.7603	14.6586	11.504	12.5303	15.8431	14.0574	11.8865	11.2119	11.2189	13.1409
TRAM2	13.5329	12.2465	13.5485	15.5111	11.283	11.9751	14.2683	9.02277	12.1195	10.2857	13.0928	13.8524	12.765	13.8034	10.2353	13.3789	11.5568	11.4851	10.9727	8.91364	11.7704	11.9331	11.0985	13.3206	11.9448	12.3869	12.0296	13.2785	10.7868	13.5836	11.6784	11.591	12.9969	13.0557	11.7103	13.8525	11.5898	10.5892	11.1927	10.0948	10.6334	10.3812	10.7606	13.3533
TRIAP1	15.2129	15.9859	16.2778	13.6832	16.0119	16.075	15.0152	15.767	15.1379	15.2032	15.4706	15.7142	14.5681	15.2899	14.5634	15.1802	15.5622	16.7961	15.4059	14.3638	15.3329	14.2447	15.3284	14.465	14.7455	15.2068	15.2599	14.2573	15.3002	13.3227	15.1945	14.6508	15.554	14.4999	13.972	14.0945	14.7071	16.0695	14.6425	14.8217	16.4326	16.2923	15.2	16.1102
TRIM14	15.3374	12.4784	13.7175	14.7707	14.1965	14.9111	14.5945	12.7545	14.3572	14.8356	14.2243	15.958	15.3776	14.6973	14.3416	13.9635	14.1996	14.378	12.8905	12.5739	14.035	12.3051	14.1879	12.622	14.475	13.8472	14.0769	12.1776	10.4346	13.7863	15.5837	14.3871	14.4055	14.2225	15.7251	13.4574	14.7333	13.558	14.0296	14.0966	13.9381	14.4886	14.1094	13.5778
TRIM26	15.546	14.6149	14.8566	16.7468	15.6255	15.0417	14.7252	14.786	14.9186	14.367	14.8142	14.512	15.7327	13.8158	14.6008	15.1772	15.2592	15.5258	14.3634	14.1718	14.3123	13.964	14.0973	14.9637	14.5606	14.545	14.0742	15.1308	14.3058	14.0054	14.6241	14.4013	14.7887	15.0095	14.5335	14.5735	14.2883	14.4639	14.0368	14.5336	15.0746	14.9061	14.8052	13.7953
TRIP10	16.1495	16.4107	15.7636	16.9951	16.1813	15.7811	15.3087	15.4175	15.3984	15.6312	15.3215	15.9389	17.0408	15.418	13.9206	16.6407	16.0624	16.8983	16.3841	15.2432	15.0303	15.918	15.333	15.7244	15.6441	15.6183	15.2415	15.568	15.9449	15.9112	15.9726	15.6211	15.839	16.175	15.7266	16.0749	15.3526	14.9139	15.0433	14.8383	16.266	15.1051	14.787	15.6346
TRIP11	14.9396	15.5383	15.7607	16.3457	14.1034	14.7789	14.7324	14.5181	14.5293	15.0833	14.4483	16.2118	15.9942	14.8638	14.6472	14.9389	14.433	14.9587	14.2799	14.5207	14.2117	15.3068	14.808	14.8125	14.2539	14.6745	14.7818	14.9261	14.6995	14.5736	15.1386	15.2037	14.4846	14.7112	14.8973	14.5624	14.5294	14.3115	14.3339	14.6699	14.7314	15.197	14.5966	15.174
TRIP4	20.1192	20.9983	21.0794	21.7711	20.9665	18.9065	18.7266	20.2845	19.5546	20.6874	20.6851	20.8568	20.2512	20.0409	20.7624	21.0193	19.3999	20.0729	20.3516	18.829	17.912	20.0369	18.9458	18.5819	19.9642	20.0957	20.6304	21.8161	18.5223	19.8173	20.7958	20.37	19.724	19.8656	20.8937	20.2235	19.9694	19.9404	18.8138	19.7253	20.2543	20.6419	20.0421	21.0573
TRIP6	14.9105	13.1063	15.9717	16.7677	15.6344	15.3017	12.5724	14.6643	13.0348	13.7431	14.3278	13.5285	16.334	13.6388	12.9069	15.231	15.3023	15.6618	16.0214	13.7013	15.2442	16.1864	15.2957	12.4073	10.6645	12.8787	13.8762	14.0244	13.9002	14.5776	14.472	12.9479	14.5158	14.1657	14.0892	12.194	14.795	15.0318	14.2079	13.7012	14.5839	13.9056	12.314	13.4947
TRMT1L	16.6079	15.8505	17.2462	17.5276	16.3919	15.5798	16.2824	15.7598	15.7506	16.2895	15.3066	13.6826	16.6234	15.8426	15.1464	15.3744	15.8414	16.3351	14.7247	14.321	14.8565	15.5116	14.9948	15.0031	14.2242	14.5306	14.9088	13.5341	15.6184	14.2808	14.8014	15.4894	15.694	14.9343	14.7465	15.1775	15.2521	15.6435	13.8713	14.676	16.1516	15.5567	15.524	16.0888
TRMU	15.6651	15.1693	15.0042	15.1461	13.8573	10.9547	14.0043	14.7626	13.035	14.2988	14.9581	13.6322	13.6333	14.297	14.1736	11.809	14.604	16.1718	13.4727	12.3112	10.6416	14.0771	13.7557	13.4669	14.0483	13.4233	14.5411	13.2746	13.6226	11.7288	13.5525	13.0197	12.4804	14.0224	12.5216	12.8333	14.269	13.4898	13.3847	12.088	13.2658	15.056	14.6876	14.496
TSC22D4	16.2431	14.8487	17.045	14.4458	15.6133	16.0104	15.1269	14.7294	14.689	15.7364	15.583	13.9496	16.6288	15.6437	13.593	15.4872	15.0883	15.2576	15.2056	14.0303	14.6141	14.6552	14.2085	15.4719	10.7568	13.534	12.17	14.523	15.1641	11.9431	15.2589	14.504	15.4759	12.0065	13.6174	15.5977	14.5562	13.8924	14.5469	14.9088	15.8689	14.7036	13.8624	16.4263
TSG101	15.7866	15.983	16.1243	18.1227	15.5959	15.4708	15.9006	15.3625	15.5656	15.6754	15.6008	15.9673	16.1576	15.7508	15.1896	16.1156	14.8823	16.4218	15.7121	15.2212	15.0786	16.0849	14.9565	15.5927	15.7853	14.8348	14.997	15.2458	15.5903	14.9482	15.1691	15.7609	15.7818	15.3514	15.7136	15.6726	15.3264	15.012	15.2637	15.4293	15.7549	14.9706	15.145	16.2527
TSN	18.7218	18.0624	18.2833	19.6588	18.434	17.8967	17.1595	17.6978	16.5423	17.8951	18.8923	18.8207	18.5444	18.4917	17.7955	17.4504	17.4612	18.8135	17.7189	18.0338	17.8645	18.4579	17.0848	17.6956	17.8345	17.5347	17.3838	17.7507	17.6997	18.4227	17.5278	17.7427	17.8573	17.7394	17.7284	17.9345	17.7703	17.7165	17.6394	17.4718	19.5408	18.6485	18.2399	18.8944
TSPAN15	15.7488	15.192	16.4071	15.8914	16.892	14.7906	17.0917	15.5006	15.5023	16.1948	16.3218	17.9609	18.9406	17.4521	15.0075	15.5144	15.2873	17.2015	15.4115	14.9068	14.9278	15.5124	15.7448	15.536	16.1455	16.2776	16.3745	15.937	15.6115	12.3409	14.5197	16.7071	14.9061	15.6018	14.8527	15.5519	15.3724	15.2205	15.535	15.7833	15.8304	14.6053	14.2825	15.5547
TSPAN8	21.8198	23.0542	19.5186	20.6499	19.9308	22.7234	21.0864	19.5082	21.121	21.5082	22.8336	21.9052	21.2819	20.7319	21.2327	21.2978	19.9565	20.1094	20.1922	20.2239	20.3144	12.6968	20.5739	17.7141	21.0901	20.6128	16.025	19.9562	19.2584	20.9682	20.0276	21.6614	19.3627	20.3305	20.2244	19.7662	21.2472	21.6534	20.9231	20.8257	19.5693	21.3894	20.8303	19.3994
TST	17.3723	18.4648	18.416	18.5451	18.0326	19.0913	19.1234	17.9392	17.0996	19.0485	18.9611	19.3849	18.4973	19.4266	18.5689	17.5446	17.2514	18.7092	17.1793	18.0813	18.0191	14.9111	17.5154	18.3072	18.808	17.6817	18.6452	18.4588	18.0408	18.0824	18.1643	18.695	18.2955	18.2911	17.3099	17.3575	18.1156	18.6387	18.7789	18.047	18.5688	17.7018	19.0821	17.8698
TTC7A	14.7206	14.7309	13.5266	14.7166	15.1389	15.1994	15.3727	13.3377	15.5909	14.3216	14.2244	12.8832	14.7397	13.2071	13.6569	14.2496	13.3384	13.8994	14.5287	12.6123	12.4242	12.8762	12.6875	12.283	10.8032	13.9684	13.8025	13.1973	10.5933	13.6894	15.3218	15.6227	16.1723	13.1906	15.8845	15.2976	13.3463	12.7099	13.4182	13.3953	14.0885	13.3982	14.7527	12.1757
TTC9C	14.9831	13.3847	19.7074	14.8957	15.25	15.732	16.5123	15.3828	15.1276	14.6711	15.4701	14.3124	12.9615	13.4155	14.1454	16.4235	13.4444	14.825	14.15	13.8514	13.5836	14.4785	13.7777	11.7756	14.039	14.4081	13.8648	13.3462	14.4841	14.9991	14.5541	15.0532	15.231	15.4636	15.5436	15.969	13.7653	14.4791	13.4516	14.0749	15.2764	14.9254	15.426	16.1594
TTYH3	13.7822	13.6211	14.7743	13.7015	12.7496	13.2801	12.4124	12.5596	13.0343	13.1993	12.9678	13.2788	14.1684	13.001	12.4496	12.6417	12.2355	12.647	12.5123	11.335	12.28	14.4635	13.1216	13.118	12.6448	12.9386	12.328	12.0277	12.8793	13.3294	12.7758	12.6034	10.4398	12.8898	11.8466	13.99	10.9432	11.9989	12.1351	10.9167	13.1612	12.6195	11.2083	13.0222
TUFT1	14.2395	13.6275	14.3348	15.5902	15.2035	12.3726	12.1372	13.7975	12.5489	13.323	14.3193	14.6813	14.6724	14.5614	14.8628	12.657	12.7218	14.2932	12.3425	12.9577	12.4503	11.7506	14.0346	12.1794	13.9941	13.4735	11.8486	13.8548	14.9824	14.6807	14.2784	14.5887	12.859	12.575	12.8593	11.8914	14.006	13.2767	13.2804	12.9804	13.2106	11.5119	13.5929	15.5257
TYMP	19.5891	20.2548	20.3914	21.8935	20.0961	19.4094	18.296	20.4767	19.3097	19.3455	19.7826	19.3194	19.8295	19.9653	16.5635	20.8771	19.2196	20.5174	19.9896	19.1832	19.0969	20.0649	18.4584	20.1585	18.4123	19.4252	18.9754	19.4449	19.5364	20.0694	19.102	19.0021	19.1144	19.4933	20.3414	19.3052	19.1922	17.8807	18.6738	18.4557	14.6731	11.964	14.5004	15.954
UACA	15.2554	14.924	16.2403	16.6815	15.274	15.6509	15.5748	14.8427	15.9884	15.3117	15.7246	16.3007	16.2197	15.5834	15.1325	14.5296	14.8435	15.7413	15.5271	14.8089	14.776	15.4503	14.7571	15.3739	15.645	15.4904	15.5236	15.1567	14.6094	15.6759	15.6289	16.0883	16.2223	15.6154	15.7098	15.6926	14.6397	15.1764	14.8108	14.9579	14.6462	14.3879	13.6382	15.0597
UAP1	16.2536	16.4275	16.9222	15.6417	15.8964	16.3632	15.935	15.587	15.1882	16.5929	16.2573	17.3236	18.1846	16.7935	15.1829	16.4377	15.4085	14.1956	15.14	15.8449	15.6199	15.8603	15.0177	15.952	15.3899	16.0304	15.7336	15.2127	16.909	15.1197	14.4952	16.3378	15.0536	15.6511	15.0376	14.9954	16.1419	14.0857	16.0933	14.4174	13.8037	14.1688	14.7613	15.9798
UBA52	16.0958	16.7756	14.1667	15.1762	16.6927	17.5637	16.3462	15.4854	17.4982	17.0466	17.6989	16.3972	16.6676	16.8117	14.1863	15.2466	15.4811	18.9286	15.0387	14.3314	14.3199	16.9083	13.3374	15.62	14.9755	15.7114	15.2665	13.5213	14.6879	12.2573	15.9602	14.7895	14.7366	14.718	15.7722	15.1239	14.186	14.1621	14.7622	14.6019	15.9999	15.8391	15.5765	14.1596
UBE2O	16.5038	16.4741	17.3862	16.3057	16.2929	16.3143	15.8296	16.3225	15.6721	16.1521	16.0533	17.0169	17.5921	15.9075	15.6656	16.5417	16.0845	17.337	14.8507	16.4394	15.7996	15.9967	16.2391	16.6989	16.298	16.209	15.6744	15.9726	16.5153	15.8066	15.5747	14.8122	15.1974	15.7852	15.6316	15.9605	16.2865	16.6107	16.1213	15.5284	17.2908	16.6436	16.0413	17.7469
UBE2R2	16.4188	16.3209	18.228	17.4996	17.7664	16.7468	17.149	17.552	17.5552	16.812	16.5393	16.4008	18.1794	16.5202	16.3136	15.3561	15.7642	16.8238	15.205	15.4496	15.3165	15.4173	16.2174	16.2003	15.8639	16.6504	16.8619	17.042	15.9959	16.1168	16.0054	15.7385	15.9203	16.7194	15.9819	16.9286	15.4936	15.5839	15.2329	14.8216	16.9944	15.8815	16.3364	17.3025
UBE4A	16.9812	16.5016	17.8691	17.5322	16.3653	16.0295	16.7219	15.394	16.1146	16.281	16.1184	17.73	17.1922	16.6826	15.7119	14.9262	15.2864	16.3812	15.7273	15.4649	15.9998	15.9866	15.6561	16.9294	15.4969	15.9038	15.7231	16.6931	15.6112	16.2608	16.163	16.1095	16.1012	16.2764	16.0274	16.3406	15.1131	15.7019	15.3321	15.4931	14.8293	16.94	16.4629	16.8382
UBR7	16.3324	15.4633	17.0227	17.6405	15.7094	15.7056	16.1483	16.5985	16.4248	16.4988	16.2217	15.0194	15.7756	16.243	16.8207	16.325	15.5157	17.7516	15.466	15.1911	15.8306	14.5617	14.5207	16.1019	15.3805	15.5493	15.2897	15.6598	16.0407	15.4924	12.8124	14.9843	14.8017	15.1227	14.7481	14.9366	15.074	15.9309	15.352	14.6028	16.2161	15.6202	14.4142	15.3919
ULK3	13.8563	11.9086	14.0124	15.8959	13.6085	12.9809	13.2824	13.1518	12.5548	12.9262	13.5331	13.2895	13.7418	12.9541	12.2974	11.636	12.7858	14.1644	11.702	13.0381	11.9408	11.5551	13.861	14.0655	13.3969	13.4304	12.8264	12.6672	13.4094	13.5614	12.2334	12.4176	13.5779	12.2722	13.2961	14.4439	13.5111	13.5916	14.1856	11.4883	13.3524	11.9636	11.5324	15.5904
UNK	14.6518	15.8268	13.1995	17.3827	14.1479	14.4728	14.8411	14.908	14.5149	14.7514	15.121	15.041	15.194	15.0096	14.885	13.3412	14.141	15.5165	12.9923	13.1533	13.2251	14.369	13.4713	11.6918	14.4354	13.4577	12.8818	14.9519	13.1847	14.1072	13.2526	13.9038	13.9206	14.87	14.3832	14.8465	12.2662	14.0458	13.2234	12.9292	14.363	12.6775	13.1314	16.4673
USE1	15.1814	15.498	17.2001	14.0033	15.914	15.1733	15.859	15.6369	15.6337	15.5242	15.4896	18.3245	16.8361	15.6905	14.8609	15.7453	15.4	15.7536	15.4729	14.7619	15.5881	16.004	15.8558	15.3086	15.347	14.9863	15.1286	15.7016	15.0693	12.2482	16.1618	14.893	16.0691	15.3425	15.3661	15.4169	15.2924	14.8373	15.4715	15.34	15.0961	15.9011	15.0924	16.4008
USH1C	15.6807	14.2904	15.6148	16.2429	16.1492	16.1891	16.0228	14.6969	14.1195	15.5737	15.9997	16.7475	17.3776	15.9328	16.6397	15.3185	16.5702	17.094	15.2395	14.9398	15.4493	16.4775	15.7549	12.9314	15.4226	16.0513	15.523	15.3636	15.7928	15.4508	15.107	15.5205	16.0384	14.2508	14.3748	14.3482	15.4988	15.2899	15.5839	16.1536	11.949	12.7139	15.0453	17.1112
USP16	15.4362	16.1898	15.2993	14.2956	15.222	13.8032	13.2443	13.8085	14.1332	15.772	12.2285	14.3661	15.9212	14.6428	13.6055	14.7135	14.1031	15.4968	12.6417	12.3841	12.8287	11.9836	13.5817	13.1385	14.1407	13.8006	12.5537	13.231	14.3022	12.5673	14.3515	13.6523	14.0907	14.5755	11.5091	13.7828	13.208	12.2191	13.3337	11.9771	13.1916	13.613	13.521	14.7552
USP48	15.6235	15.4414	16.0196	14.6446	14.6141	15.3857	15.3092	15.4037	15.1989	14.9144	15.6195	15.6317	16.1523	15.3022	15.171	15.4273	13.2091	16.0832	13.9511	14.6278	13.8954	15.5527	13.6814	13.4304	15.2284	14.8748	14.1371	13.975	13.6385	14.2201	14.8962	15.0267	15.0343	15.3274	15.1561	15.5247	14.2015	14.6857	14.1042	14.0501	14.7361	15.5711	13.9899	13.0919
USP7	18.4452	17.6481	18.7376	19.5224	18.366	17.9868	18.0837	18.119	18.0716	17.7695	18.3009	18.3953	18.4945	17.8942	18.6971	17.7545	17.9389	19.665	17.7682	17.8671	18.1338	18.3283	17.5801	17.6134	18.3227	17.3171	17.6435	17.8114	18.0445	18.1325	17.954	17.7539	18.4678	18.1949	17.7081	17.9393	18.05	18.1842	17.4705	18.3111	18.4591	18.0121	17.7649	17.9421
USP8	16.4243	16.8947	16.3083	17.8176	16.1456	15.9076	16.1601	15.7757	16.253	16.8328	16.2727	17.1519	17.0495	16.7041	16.0575	15.6521	14.9291	15.6603	15.8217	15.6031	14.8332	15.9537	15.5635	16.5377	15.937	16.4365	16.069	15.5791	15.7649	15.3329	16.5399	16.1509	16.0226	16.6569	16.2045	16.6056	15.792	15.2139	15.7303	15.1522	16.5349	14.8607	15.0993	17.0339
UTP3	14.9851	12.4557	15.1771	16.4752	15.5405	14.4432	14.6485	14.5457	13.8165	13.4756	14.8695	16.716	14.6917	14.0235	14.076	14.3488	14.1036	16.4096	13.6456	14.0647	13.845	13.0875	14.8214	12.914	14.324	12.9557	13.1496	12.2147	14.1448	12.9668	14.3928	11.8563	14.9466	14.9299	14.2842	12.8949	14.4197	13.7018	13.3211	13.5544	14.5648	15.1844	15.2238	16.6205
UTRN	15.5354	13.9127	16.3371	16.3391	14.7982	15.0801	15.7888	14.9903	15.9389	15.5768	15.515	16.2333	16.379	16.003	14.858	15.193	15.1159	16.0933	15.5191	16.1641	14.921	16.3482	15.1715	15.9716	14.6534	14.9273	14.6234	15.554	14.6487	15.1818	15.7844	15.4981	15.7016	15.5638	15.6698	15.5948	14.7097	14.941	15.0272	14.5613	14.8384	14.5216	11.8096	15.4325
VAMP4	15.2968	14.7462	16.0913	18.4257	15.0625	14.4523	15.091	13.9577	14.9617	15.8778	14.3366	13.7951	14.2161	15.3472	15.2127	14.0213	13.5855	12.9802	14.5867	13.5902	12.8892	13.3805	10.2966	12.3502	13.237	13.8616	10.9603	14.859	15.6562	12.6316	15.0138	13.6161	14.0852	12.6927	13.2511	12.9417	12.137	13.2123	13.2113	16.8957	13.38	10.4339	14.0682	15.9081
VAMP7	13.1543	12.9193	14.3479	14.9443	13.4339	13.6547	13.3359	12.9527	14.0611	13.4769	13.9815	14.8554	15.3254	14.1648	14.094	13.8718	13.6425	14.9954	13.7415	12.2273	13.3163	14.7659	14.31	15.0103	14.8357	14.5602	13.7085	14.4694	11.0698	13.3123	13.5316	13.2038	14.2398	13.6675	14.0406	13.9357	13.2238	12.9677	12.9223	13.7819	13.2713	13.3531	14.3081	16.2205
VAMP8	19.2921	19.2889	19.7596	19.7091	18.8376	18.0591	17.5901	17.235	17.1988	18.3614	18.7135	19.2607	19.5001	18.634	17.5115	16.0181	15.7188	17.4743	15.0739	16.0312	17.7084	16.555	16.3391	18.2346	17.8333	17.0023	17.4321	17.8363	18.0647	18.3358	17.8772	17.317	16.8376	17.0664	17.0844	17.8914	17.2305	16.3275	16.7449	18.326	17.3621	16.9687	18.5739	19.1498
VASP	18.4407	18.2662	19.19	18.3008	18.4555	18.6109	17.513	18.1018	17.8571	18.471	18.3034	17.5686	19.3404	18.4763	18.5315	19.1454	19.0473	19.6185	18.9857	18.4228	18.6058	19.4478	18.4461	17.7819	18.1528	17.7094	17.5323	17.8438	18.5534	18.3401	19.0639	18.2764	18.3148	18.9541	18.6973	19.2857	18.8221	18.3674	18.5924	19.25	18.2377	16.1576	16.888	18.9171
VAT1	18.3458	18.3278	18.2663	19.6811	17.656	17.3771	18.7557	17.4574	18.5199	18.0327	18.0562	18.6602	19.1406	18.1172	16.4682	18.0914	17.3937	17.6026	18.9392	18.6988	17.7994	19.1658	17.4838	18.7526	16.4811	17.4759	17.6552	18.2594	17.0886	18.2951	19.0373	18.4982	18.8373	19.3919	19.347	19.6339	17.4982	17.7068	17.8963	17.4587	18.3082	18.0388	19.065	18.1437
VDAC3	20.7703	21.1461	21.1618	21.8672	20.8249	21.2306	21.9824	21.2552	22.2195	21.9476	20.9155	21.6215	20.0854	20.5658	21.3929	20.2096	20.6148	21.9386	21.1094	19.9202	20.8028	21.4186	21.0496	20.4913	21.1152	20.1479	20.4079	21.0978	18.5695	20.0192	21.3225	20.5662	20.4251	21.1447	20.0193	21.1475	19.8693	20.06	19.9904	20.7797	21.1263	20.5108	22.2583	16.9922
VPS13C	15.5607	15.3884	15.6599	15.9872	15.59	14.8005	15.6288	15.1231	15.5175	15.5241	16.2882	16.3205	17.0354	15.9719	14.4639	14.9559	15.0278	16.43	15.0807	15.6381	14.6651	15.8591	15.3518	16.1453	15.0678	15.5929	15.3586	15.5373	14.2252	15.3812	15.4313	15.9502	15.3244	15.6535	15.9312	16.0491	15.5694	14.9221	15.3041	15.0586	15.3452	15.2113	14.0206	15.4811
VPS37A	13.8108	13.3466	15.0871	15.8817	14.1135	14.5897	14.1872	14.3398	13.4247	13.7422	14.0348	14.974	15.727	13.3574	13.4444	12.1637	13.2429	14.8023	13.3353	12.3678	9.93091	15.7537	13.602	11.9654	13.654	15.1205	14.5577	14.3321	14.3418	13.6085	13.1509	13.1189	13.9882	13.5261	12.5917	12.7845	13.18	13.1169	12.8001	10.8022	14.6798	10.4989	13.0996	13.2409
VPS37C	15.5003	12.6049	15.317	17.0892	14.817	12.5834	14.6171	13.0447	13.3607	13.3767	14.8425	13.0793	16.1698	15.4918	12.1751	14.7394	14.554	16.5193	16.2916	14.4486	14.1426	15.0914	14.441	12.7688	13.1554	12.0398	13.7674	13.536	14.4747	16.0192	12.5234	12.0742	11.4854	12.0885	13.6053	12.931	13.7901	14.193	14.3688	14.4372	14.5613	13.2613	11.4831	13.5267
VPS4B	18.4499	17.8416	18.9278	19.079	17.133	18.855	18.6613	18.5349	18.1482	18.6871	18.4007	19.0193	19.251	18.2293	17.6841	18.3403	18.1694	19.3505	18.1826	18.2427	17.9452	18.7616	18.654	18.2459	17.697	17.9847	18.2117	17.9054	18.2116	17.6818	18.1542	18.4214	18.4292	18.4995	18.4019	18.8282	17.623	18.3003	18.2278	18.9106	18.8396	17.98	17.3299	17.8813
VRK3	15.5443	12.876	15.2636	15.9237	14.2124	13.1084	12.109	14.1059	15.2598	13.9845	13.3455	14.6273	15.8896	13.7553	13.8657	14.0082	14.3176	16.4539	12.062	13.4044	13.7826	13.0481	14.4273	14.6773	13.1498	14.4033	14.0926	12.4877	13.1545	12.9292	13.5196	13.3484	12.1623	14.5791	13.3553	13.9539	13.2247	14.1209	13.2068	13.0114	14.0938	12.6052	12.671	14.823
WARS2	13.9757	17.2015	14.0197	15.9729	15.1578	16.4309	17.449	16.3412	13.1865	16.9712	16.9363	17.6138	16.372	16.5175	15.6742	15.7584	14.6028	13.6462	14.972	15.0101	15.4776	12.0228	15.347	12.7941	16.4169	16.1681	15.9396	16.3268	15.4648	12.1517	16.7412	16.2196	17.1658	17.1837	15.8229	15.8153	15.1374	15.6146	14.2634	15.3451	16.1932	15.8945	16.6942	16.2295
WAS	17.0135	16.6664	16.6435	16.2367	15.6196	15.4137	16.962	16.0284	17.1738	17.1016	16.0239	16.5373	17.3868	15.9215	11.6715	17.133	15.98	16.8864	16.257	15.0045	15.1726	16.677	15.9223	16.8531	12.1861	15.9755	14.9639	16.36	16.2248	16.1067	17.477	16.4811	16.0238	11.5364	16.0932	17.4628	16.0251	14.3739	15.5665	15.716	12.3943	11.9362	11.9246	13.1609
WASF2	18.0328	18.1882	18.4174	18.5289	17.7459	18.0645	17.9609	17.3695	17.7396	18.0821	18.2901	18.6053	18.4355	18.3287	17.3243	17.0198	17.2545	18.1897	17.3549	17.1904	17.6267	17.3732	17.3372	17.4406	17.8085	17.0276	16.6171	16.9935	17.6475	17.6084	17.4133	17.0557	17.1742	17.6637	17.2503	17.9029	16.833	16.5943	16.9935	17.5074	16.1829	16.5147	16.6876	18.1928
WDHD1	16.5639	17.3279	18.8598	17.2357	17.983	17.18	15.7663	17.4103	16.1539	16.5384	15.938	14.3064	17.5401	17.386	17.4479	16.128	15.5275	15.0786	16.2721	14.8468	16.0166	16.6355	16.0318	21.537	17.5815	18.1903	17.4382	21.0654	17.6284	18.6604	14.56	17.5192	16.7987	18.6066	17.2243	17.8449	15.9708	15.7485	16.0406	14.5844	16.6031	17.4383	16.759	17.0642
WDR5	14.0725	15.6382	15.7075	15.5971	15.4538	15.4691	14.728	15.3599	15.0627	15.6326	16.1401	13.6307	14.0722	14.6375	15.3167	15.8598	15.5598	14.4425	15.4438	14.3439	14.7909	15.7216	14.3042	13.671	14.8144	14.8601	10.8354	15.0916	13.4895	11.543	15.0548	14.1123	14.9161	14.7196	14.7123	14.7724	14.0071	15.085	14.3339	14.7009	16.4693	14.6942	15.8219	12.7513
WDR77	17.8531	18.5614	18.1668	18.3687	17.2113	17.2616	16.0916	17.2876	15.7123	16.8751	17.6426	17.4406	18.0944	17.1679	17.2545	17.9355	17.795	21.0121	17.4844	17.2811	17.9383	17.6545	17.4692	16.332	17.2635	17.5093	16.9329	17.5374	17.3624	16.7042	16.4998	16.0155	15.5988	16.647	15.8857	17.0854	17.6878	17.5568	16.7651	17.6075	18.9064	18.0864	18.2291	17.2617
WIPF1	16.7843	15.9014	16.4809	18.5269	14.9317	14.2999	13.0181	13.0911	12.6043	16.1828	16.6744	14.4331	16.9529	17.7375	12.3032	15.6012	15.3013	16.7558	15.8591	14.5711	14.1429	16.0002	15.3952	13.014	11.0333	14.4879	11.8361	12.6271	14.5203	11.4994	16.2425	11.6616	12.2926	16.2541	15.2795	12.9019	15.6073	14.4509	14.841	14.8426	11.5552	11.875	11.9295	12.8891
WIZ	16.3538	16.4473	16.8029	16.7756	15.1522	15.1006	15.5154	15.9534	15.6316	15.2118	15.1585	13.6131	15.8812	15.6701	14.1356	13.7438	15.3517	16.9012	14.7345	13.3018	14.0973	14.8204	15.1853	12.7567	15.8855	15.7481	15.0919	15.6868	15.107	15.3873	15.0817	14.5386	15.3621	13.6671	17.3179	14.5439	14.1792	14.4782	13.2518	13.267	14.8821	15.5546	15.4712	16.4529
YIPF3	17.224	17.7597	17.5446	16.8366	16.5903	16.2162	16.6979	16.2056	16.153	16.9638	16.5436	16.8151	18.0094	16.5083	15.873	16.8219	16.3896	17.5604	15.7052	15.6064	15.9701	15.8759	16.3722	15.9068	15.8874	16.1769	16.0735	15.9867	16.5773	16.538	16.2581	16.0695	16.3298	16.0022	15.0121	13.4018	16.3612	16.0978	15.8538	16.7174	16.5494	17.4552	16.8211	17.3625
YTHDC1	13.3998	12.2713	13.5612	13.3856	13.1208	13.086	12.3418	12.6922	11.3077	12.0955	12.2135	13.1021	14.4308	12.6645	11.9037	11.0249	12.5191	13.3007	13.8684	11.5896	9.61408	12.6743	12.0868	13.4693	11.4725	10.9398	13.0837	12.3135	12.7166	11.6694	11.5889	11.0384	12.4616	13.5238	12.5704	13.0803	11.5023	11.4004	11.3936	9.21429	14.8955	14.8125	14.3172	16.0993
YTHDC2	15.2666	14.718	15.0699	13.7912	14.4454	14.0772	14.2887	14.7228	14.102	14.0597	14.8558	13.7291	19.0429	13.8512	13.7173	14.2217	15.8387	16.1752	14.5601	13.6571	14.1354	13.2225	14.1939	13.8498	13.5233	13.9105	13.1609	14.4024	13.7234	12.7628	14.2468	14.2228	14.2541	14.3526	14.0404	15.5039	14.5734	14.1525	13.6806	12.9393	15.1419	15.4887	14.3118	15.5187
ZBTB8OS	14.9546	14.2694	16.6153	15.5221	16.056	12.4486	17.2019	17.9366	16.4388	14.1813	15.1834	16.9797	17.67	14.9725	13.1854	16.2013	15.0058	18.085	14.7016	14.4978	13.3967	15.2552	13.4552	12.273	13.3093	12.9805	12.6341	17.3987	13.7366	12.5896	12.9175	15.1796	12.2882	13.5198	12.653	12.4024	14.815	13.9901	14.7036	14.17	15.6358	14.3178	14.071	12.2069
ZC3H7B	15.9161	15.4474	17.1933	17.3716	15.4983	15.2358	15.6615	15.6248	14.5575	15.0412	15.6204	14.901	18.959	15.817	15.1749	15.8331	16.1138	17.2532	15.3967	13.0992	14.2913	17.4338	15.1796	15.7378	15.7737	15.2907	15.1677	14.6844	14.645	14.486	14.6457	14.4107	15.2925	14.9595	14.5529	13.8217	14.8412	14.4291	14.5935	14.7413	16.393	15.5643	14.9842	13.8828
ZCCHC8	15.5982	15.1667	16.2889	16.9787	15.1786	15.4776	15.3152	15.4576	15.3363	15.2047	15.1882	15.5169	16.9642	15.322	15.3011	14.9507	15.6711	17.0329	15.2786	15.0744	14.8743	14.6439	15.0329	14.2447	14.6939	15.2334	14.7248	15.2768	15.018	14.5357	15.3396	14.771	15.3552	16.0336	15.2611	15.6749	15.1616	15.1927	14.8626	15.2923	14.5789	15.9606	15.0923	16.072
ZNF638	16.1574	16.2975	17.8722	16.8629	16.4284	15.7718	17.0169	15.9064	16.3356	16.5063	15.9981	16.6505	16.659	16.0754	16.752	15.7544	15.6781	16.8961	15.3436	14.3814	15.5234	14.758	15.001	15.4741	15.9966	15.7004	15.318	16.6956	15.6738	15.2394	16.623	16.1312	15.9907	16.0424	15.86	15.9174	14.9843	15.6907	14.7564	15.1976	15.9907	16.5852	15.937	16.9806
A1BG	17.2593	18.4695	19.3904	19.7083	17.8629	18.6792	18.2903	17.9043	18.0451	18.771	16.3542	18.9372	20.7045	18.033	17.7711	17.9823	17.853	18.4491	19.1991	20.6426	18.8682	20.8146	18.9506	22.0415	18.5909	18.7425	19.6844	20.9999	19.6707	20.7852	18.5384	19.8378	18.4044	20.5666	20.0933	20.9423	19.2375	19.3834	19.8966	18.3359	11.5018	11.6696	12.1566	13.1234
A1CF	16.0341	15.7885	13.8598	15.1767	14.9532	16.1729	15.3166	14.8563	15.1629	16.036	14.7524	16.8161	17.5967	15.1566	16.204	15.0441	15.3376	12.2834	15.0555	15.4185	14.8821	12.3549	14.4761	11.5625	16.045	15.0807	15.7946	15.5244	15.8597	15.191	13.2227	15.6198	15.6825	16.9539	11.9028	15.3431	15.4807	15.0074	15.0565	14.6675	12.4976	12.5829	15.6537	15.4969
A2M	17.6287	18.2146	18.121	18.5975	16.4422	17.7034	16.872	17.0369	17.0737	17.7791	16.6196	17.6113	18.6492	17.8883	16.5173	16.5103	17.5432	17.8403	17.2236	19.7544	18.3891	19.0117	18.2131	20.4136	18.5297	19.3643	18.3025	20.3806	18.2024	19.3845	17.8213	19.2725	18.5228	19.451	19.2735	20.3679	19.0678	18.176	20.0031	16.7897	11.5399	14.7141	13.3851	13.9975
AAAS	16.5879	13.0288	15.0806	14.966	16.3362	17.6282	13.6236	16.6139	14.8411	16.3761	15.7142	14.2568	13.8057	15.9963	14.2528	15.2348	17.0837	18.1408	16.3333	15.28	15.6228	15.7184	14.5074	12.9557	16.0445	15.7125	12.3834	15.268	15.1656	16.2522	16.3394	15.4646	15.3426	12.1702	16.2792	15.3403	15.5319	16.2644	14.9749	15.7004	16.3643	16.0811	16.0953	17.7236
AACS	17.2185	17.7476	16.9351	17.4278	16.6444	16.6394	17.0109	16.7718	16.2431	17.0827	16.8197	18.3444	18.1453	16.7162	17.5651	17.2075	17.061	17.5408	15.1477	16.388	16.4297	14.931	17.339	12.9156	17.0893	16.9384	16.0595	16.7756	16.456	17.2896	13.3065	16.4101	16.3266	15.7639	16.507	15.4044	16.4177	16.8678	16.3981	16.2067	18.0912	17.3728	17.7795	18.7592
AAK1	15.4943	15.4658	16.7822	17.497	15.4165	16.0866	16.3522	14.964	16.1296	15.1268	14.7769	15.3548	17.0176	15.4976	14.6421	15.6943	15.425	17.2884	15.1837	12.3487	15.487	16.0361	15.3533	13.6068	14.3656	14.7616	14.3519	14.9025	14.8486	13.9156	15.6464	14.4347	15.5384	13.4577	14.088	15.6	14.7166	14.5139	13.8007	14.5277	12.1558	15.0479	15.0754	16.5793
AAMDC	16.8002	17.3145	18.3764	18.8956	17.2548	17.618	17.2701	17.0422	16.2313	17.3026	17.8048	18.7126	16.8494	17.7226	15.8785	15.8474	16.4307	14.6887	18.3178	17.0337	15.1015	17.2271	15.8091	17.6611	16.4992	17.7043	17.5062	18.5157	16.9385	17.5123	17.6693	17.779	16.5734	18.7573	16.6776	18.4122	16.9598	16.0367	16.553	15.9915	15.8115	15.8818	15.7558	17.2263
AAMP	16.6839	14.623	19.8055	16.9065	16.1102	14.8481	14.55	15.0259	14.4695	14.0322	18.1454	14.3776	14.2432	13.5231	14.2836	12.7461	15.3392	17.6172	15.1242	15.1187	14.7286	15.4742	15.2625	12.8767	14.123	14.5168	12.1543	14.0999	13.733	11.5481	13.6711	14.8382	14.5352	12.5762	14.2318	14.217	15.0784	14.7812	14.0764	13.631	16.2439	15.1543	14.315	13.5181
AAR2	16.2973	15.1318	17.2522	17.627	15.616	14.7742	14.6535	14.9252	13.3638	12.3971	15.6842	13.594	13.7662	15.7101	15.6587	14.6363	15.8439	17.9623	15.5179	14.1501	14.8161	14.4227	15.3217	14.833	15.5956	15.0876	15.4144	14.007	14.6249	14.0494	13.2824	11.545	15.9564	15.4711	12.3706	15.0853	14.4941	14.4012	14.9755	14.1255	14.3476	15.1569	14.7543	16.4807
AARS1	17.7244	18.0388	18.2985	17.7621	16.9534	17.8306	17.5952	18.0728	17.7791	17.4016	17.4291	17.8604	17.9816	17.3573	18.0102	17.2931	17.145	17.1683	16.6645	17.1118	17.0689	16.885	16.9225	17.4256	17.8443	17.7787	17.4778	17.7272	17.6027	17.5828	17.4709	17.5281	17.5511	17.4172	17.3209	17.7573	16.9203	16.7204	17.1045	17.2313	17.4329	16.7379	17.7305	19.0325
AARS2	16.4763	16.822	17.3946	17.6768	16.5997	16.144	16.3438	16.0136	15.4184	16.114	16.54	16.53	16.8963	16.8484	15.9534	14.1806	15.2718	16.7315	15.9489	15.2574	14.9935	16.2487	15.3466	16.6629	15.3944	16.4506	16.3256	15.8608	15.2841	15.1238	15.9569	15.881	15.277	15.7979	15.8252	15.739	14.7427	15.4764	14.7802	15.1567	15.3679	16.0502	15.5455	16.1953
AARSD1	15.5943	16.4594	17.3124	16.5804	16.1916	15.3031	12.5694	14.7956	12.2744	14.8028	15.5097	15.4985	16.3698	15.1497	15.0714	15.0464	15.5849	16.0225	14.3243	14.2928	15.1261	15.2388	14.6607	14.4442	15.5499	15.2987	14.8673	12.247	14.4052	14.6533	14.7312	14.2614	14.7027	15.0598	14.9698	14.2394	14.649	15.6587	14.9113	13.9151	15.5619	15.4402	16.0572	15.9341
AASDHPPT	13.5754	12.2226	14.5055	13.8657	14.324	12.6155	13.7395	12.5254	11.8419	12.9381	13.7117	13.0992	13.8201	12.4258	12.5771	11.1483	12.8219	12.9507	12.9109	12.9211	11.7958	12.1752	11.9787	12.2688	12.4594	11.532	11.7403	12.0028	13.13	12.1293	12.8704	12.5026	12.75	12.3661	12.8089	13.2583	12.1928	13.5934	12.8651	10.9387	12.1433	14.7476	14.1158	13.2043
AASS	12.8667	15.1973	12.9084	15.6257	13.0978	14.0829	14.6785	12.1055	14.8298	14.4023	14.0116	13.2945	12.2961	14.4212	11.5741	14.2609	11.3768	14.2882	14.6372	15.1061	12.9765	13.5629	12.7157	17.6423	13.5371	12.6345	13.0775	12.361	12.8206	11.8415	14.4564	14.3621	13.2663	14.6696	14.2025	14.6418	12.7845	14.0022	14.0579	12.022	14.9523	15.2118	10.0737	12.9231
AATF	14.583	13.8889	16.0444	14.7461	14.2353	14.2607	11.5533	13.3971	12.588	14.2923	14.3841	13.4743	14.3425	13.8275	14.0385	13.5114	14.3076	15.7338	13.2664	12.626	12.495	13.4827	15.184	12.0139	14.2291	15.1665	13.8541	13.3812	13.9351	14.0001	13.6858	11.5151	14.3947	14.9124	13.242	13.1487	12.5439	13.4152	13.3457	12.2941	14.6638	15.3487	14.0161	15.4213
ABAT	15.4496	16.4132	14.0576	18.4743	15.4486	15.5319	15.6341	14.8043	16.6455	16.0368	15.646	18.4884	16.8732	16.0644	12.909	14.6069	12.371	15.0233	15.0836	15.1588	14.6657	11.903	14.9238	16.5119	16.6933	15.5259	16.7526	16.7253	15.7438	16.3022	16.9904	16.2481	14.7628	16.7602	15.7106	16.7645	15.8214	14.9206	15.3023	14.6634	16.2244	16.6311	16.2544	16.5306
ABCA8	12.7995	17.4976	13.5347	15.4427	13.6625	11.862	17.8624	11.0219	13.6245	16.1297	12.0354	17.8566	14.1143	16.8038	12.7754	11.2134	11.9453	12.5288	14.6267	16.1631	15.5614	16.2135	17.2312	12.4377	12.5167	12.1811	17.5659	16.2852	17.6468	12.7436	16.3947	16.5664	15.3164	18.4051	17.229	17.5013	14.9173	16.9771	16.019	13.6985	12.5277	17.7634	12.0225	12.7528
ABCB1	16.9255	14.7259	15.9665	18.493	15.2445	14.7985	15.5992	15.2781	15.7833	15.124	15.2084	16.6601	15.4566	16.0974	14.1992	15.1858	10.9518	15.0625	14.7402	14.067	14.7161	13.9156	13.1469	15.2527	14.6702	13.5432	15.018	13.4879	11.0174	14.2983	14.6048	14.7251	15.027	15.5732	14.5043	14.2184	13.1243	14.6409	14.5437	16.2318	14.4355	16.8332	18.1429	17.9974
ABCB10	15.817	14.971	16.2853	17.7208	15.9141	16.0007	16.288	16.5101	16.4849	16.4324	15.4154	13.869	15.0545	15.9866	16.4595	13.8928	14.5466	16.0051	14.2975	14.2674	12.8896	13.2929	15.0747	14.6889	15.4425	15.6058	15.7895	15.2665	12.9793	15.4139	16.8083	14.5837	14.7345	16.4545	15.246	15.8915	14.0314	14.8186	14.9966	13.7427	14.8263	15.1913	15.6223	13.3108
ABCB6	18.843	20.6211	21.645	14.6489	19.8489	20.9808	19.2624	20.3677	17.6768	20.4444	19.604	14.078	20.0238	19.192	20.1979	19.048	18.4653	20.688	17.7477	19.1874	16.6062	12.3321	14.9928	19.6156	17.982	20.2831	19.6168	20.6548	11.9801	21.2343	20.1623	20.3476	20.077	20.2441	21.069	20.9616	19.068	18.9234	18.6385	19.3102	19.9462	19.7111	20.4794	16.0159
ABCB8	16.1591	15.794	17.4357	17.0885	15.7244	15.644	16.1067	14.9605	16.0104	16.7768	16.3419	13.852	18.1149	15.0489	15.6301	13.9785	16.7407	16.2189	15.9811	13.651	15.1326	15.3303	15.371	16.5972	15.5412	16.0135	14.6921	16.1462	15.3752	17.9303	16.2434	15.7523	15.5546	15.7093	15.3491	11.9268	13.8525	15.2409	15.3089	14.85	15.929	14.2388	15.8544	16.1762
ABCC1	16.3883	16.223	17.7699	17.706	16.4912	15.8943	16.9283	15.709	16.3409	16.2803	17.07	18.8643	16.6826	15.3411	16.4934	16.3779	15.5144	17.7196	15.6353	15.4552	15.9263	16.7199	15.7448	16.3711	16.0021	16.3015	16.308	16.2366	15.4091	13.0256	15.4591	15.1614	15.4911	15.7603	15.3793	15.4999	15.6431	15.4979	15.3712	15.3441	17.2083	16.7774	16.3717	16.6106
ABCC10	19.3743	13.4741	14.5741	14.3175	13.4047	11.8228	11.6817	11.5562	12.9682	11.6703	13.8492	13.9885	14.3728	13.654	12.8731	12.7853	14.0518	14.6652	11.6692	10.967	12.5781	11.1034	13.9757	12.0622	12.621	11.8587	12.4032	12.736	10.6813	11.6127	13.2074	11.3186	12.1997	12.1492	12.2839	14.3646	11.0844	10.2928	12.0069	13.9103	15.3125	13.3255	13.0972	13.3672
ABCC12	16.3197	17.8552	16.4496	14.7872	16.5109	18.0187	15.6142	12.9162	12.7219	17.3328	17.5001	18.2577	16.7878	17.6313	16.7291	15.6617	15.7308	13.6529	15.0289	15.7362	16.389	12.1825	15.5213	17.0053	16.3791	17.7231	16.4767	12.0639	16.7668	17.0057	16.5779	17.5929	16.02	16.3994	15.7133	11.1308	14.8181	16.3018	16.9022	16.4145	11.3849	15.2266	15.9199	17.2358
ABCC4	16.3147	16.296	16.9931	18.2163	16.4922	15.4813	17.026	15.3673	16.6045	16.6597	15.8824	18.2434	16.8402	16.4696	15.6344	16.0073	15.587	18.322	14.5337	15.9314	15.6646	16.8483	15.8412	15.362	15.6142	12.3913	13.2615	15.5595	13.7067	12.9545	15.751	15.8118	15.1581	15.4116	15.6873	15.647	14.5527	15.4344	15.5247	12.7513	15.3417	14.72	15.9952	17.212
ABCD1	13.1214	13.2521	14.1067	13.4093	12.6114	12.1243	12.2491	11.3684	13.3266	13.7339	13.4705	13.0756	14.2586	13.539	11.9132	13.907	11.9477	15.1516	13.5036	10.6798	13.5205	14.5754	12.305	13.6788	11.9243	12.3862	13.7166	13.0214	10.8628	13.1565	12.3654	12.4098	13.0119	11.4979	12.0778	12.6044	10.9671	11.314	12.2757	13.1404	10.0282	12.5139	12.2398	13.8934
ABCD3	15.9276	15.3657	16.4424	16.7691	15.7281	15.4737	15.1539	15.4336	15.1624	15.879	16.1982	16.2762	16.1898	16.1571	15.3447	16.2799	15.6853	16.563	16.2139	15.1066	15.8917	15.7879	16.6673	15.8919	15.9445	15.0247	15.3819	15.3456	14.7839	14.9833	15.1102	14.9908	14.8159	15.4437	14.772	14.7993	16.153	15.6476	16.1228	16.2981	16.9358	16.8903	16.8289	16.2475
ABCD4	13.8491	14.7172	13.233	14.6356	14.5648	13.2358	17.4939	11.7545	16.1011	14.86	14.5986	14.4131	15.0986	15.6067	14.2535	14.1008	12.0224	17.2264	14.5422	14.4261	14.797	10.8786	13.5063	13.0488	13.1597	12.8359	13.1064	11.64	11.6597	12.9924	14.0529	12.9786	12.7178	12.2674	15.0092	12.823	13.5869	14.6582	13.4418	15.1552	15.0596	14.2151	14.8462	13.0397
ABCE1	18.6162	18.8404	17.4849	19.0154	18.6052	18.2413	18.3012	18.7258	18.7975	18.1064	18.2022	18.2638	18.9709	17.8235	17.7553	18.2468	18.6146	19.8233	17.7261	17.5552	18.4533	18.2702	18.45	18.4655	19.1957	18.8543	18.2787	18.4138	18.6682	18.7929	18.5246	18.1218	18.9177	18.5769	18.8802	18.2301	18.1504	17.9213	17.7105	17.4209	18.364	18.674	18.9698	19.539
ABCF1	17.9081	17.8391	18.3851	18.6888	17.7246	16.5597	16.8206	17.0498	16.9714	17.1859	16.8509	17.739	17.8926	17.1545	17.2498	17.1712	17.3418	17.1689	16.8379	15.9776	16.4972	16.4317	16.8098	16.1533	16.6886	16.8494	16.4311	17.0987	17.7999	16.9442	17.3436	16.5606	17.1289	16.6484	16.8321	17.2287	17.0682	16.8221	16.5465	16.9878	17.4253	16.6927	17.254	18.9673
ABCF2	17.3484	17.0029	18.626	18.7696	17.2068	16.5416	16.7971	17.1935	17.0667	16.4483	16.7421	17.7058	18.1285	16.7051	16.9474	17.1264	17.425	18.0816	16.714	15.558	16.4792	16.6042	16.5456	16.6193	17.0215	16.3652	16.5739	16.6867	16.1534	17.9088	16.8961	16.0732	17.5972	16.4992	16.878	16.755	16.6978	16.2585	16.157	16.5658	16.7252	17.7485	18.1181	18.313
ABCF3	15.4991	15.6564	16.7367	16.9002	16.2537	16.0146	14.5875	15.1573	15.0977	15.9276	15.999	15.8838	15.9745	16.4261	15.4398	14.1084	14.862	15.4598	15.0819	15.0203	14.2312	15.1638	13.8295	15.6652	16.0619	15.3712	15.1296	15.8078	15.8633	15.763	14.9003	14.5198	15.927	16.0325	15.1415	14.1193	14.6451	14.5538	14.3242	14.6138	15.8192	15.7497	16.0002	17.0421
ABHD10	17.156	18.8527	18.6071	14.759	17.9998	17.3873	19.0074	18.1451	18.3383	18.1964	18.508	18.741	18.1083	17.7478	17.4691	17.7003	17.0361	17.6692	18.5639	17.8819	17.0675	16.4431	17.4039	18.5845	18.0674	17.9007	17.6567	18.0758	17.1224	17.5624	17.6895	17.9045	17.7375	18.4023	17.4904	17.8953	17.9124	17.9945	17.8551	18.1503	19.2113	17.9822	18.2806	17.8451
ABHD11	17.0918	17.4827	16.7498	16.3102	17.3488	17.6566	17.6726	16.9352	16.2785	17.644	18.2616	18.191	17.2256	18.5202	18.0068	17.4242	16.2409	18.1748	17.2442	17.9257	16.3349	15.2278	16.8946	16.9451	17.4261	17.1546	17.9903	16.8002	15.5073	17.1407	17.8209	17.5586	16.2231	17.3933	17.0378	16.9137	17.0021	17.501	17.5903	19.0266	18.8091	18.3476	19.2768	17.3243
ABHD12	17.1275	16.5583	18.4361	19.8295	17.3456	16.4276	17.1342	16.4966	16.4231	17.3673	16.8952	16.606	16.9447	16.6666	17.2876	16.3805	16.6489	16.8882	16.1006	15.5063	15.0123	15.1676	16.6168	15.9851	15.0026	14.9419	17.2112	16.5059	15.9761	16.698	16.8312	15.7996	16.2276	17.4149	16.098	16.574	15.8759	15.8361	16.6403	17.4072	17.3157	16.7093	17.6449	17.8103
ABHD13	12.42	14.0118	15.7693	16.7681	15.7739	10.6657	12.0581	14.3667	12.2623	13.7349	15.298	14.3398	15.8899	12.7304	12.3368	14.8296	16.6326	18.3054	15.0228	12.6921	15.3257	16.4917	16.2376	12.0283	15.5635	12.3198	12.7776	11.6704	12.1758	12.4138	12.7498	12.7078	12.9638	12.5205	12.2624	11.9169	15.4427	15.2329	14.8211	16.4183	15.8412	15.2711	16.6875	13.0226
ABHD14B	18.5504	18.6377	18.6715	19.9383	18.2274	18.1322	17.5146	17.2768	17.5321	18.4925	19.3224	18.5408	19.3715	19.5373	17.771	17.849	18.1743	19.2377	17.8184	18.575	17.6302	17.7012	16.6581	18.6152	18.7048	17.397	17.7598	17.1865	18.7131	18.2435	18.1195	18.7168	17.337	18.2184	17.4834	18.1133	18.518	18.1877	18.7242	18.0241	18.0715	17.6502	17.7386	18.9959
ABHD16A	16.2918	16.5693	17.7272	16.5624	15.6593	15.2602	14.5089	15.066	15.0716	15.7962	15.9096	16.5323	17.332	16.1665	16.3109	15.9102	16.1479	17.5309	15.6584	15.3634	15.818	15.9223	16.0075	15.7887	15.3667	15.685	15.4778	15.0824	14.6937	15.9743	15.7444	15.3827	13.9333	15.4466	14.8111	15.6247	15.7433	15.8313	15.8064	16.4219	16.3298	16.247	16.5787	15.9827
ABHD17B	13.1254	14.5204	14.3371	14.1669	14.947	12.3905	13.0526	11.5423	12.4876	14.4645	14.5792	14.1572	14.0484	14.9673	14.1929	14.6284	13.2524	16.7888	14.0132	13.7254	13.8939	14.5096	13.2811	13.612	11.308	14.0768	10.6368	12.4918	12.8045	11.8103	17.8954	14.1589	17.8115	13.212	12.5353	12.5693	13.4559	13.2245	13.6002	12.8093	14.8644	14.5292	14.5546	13.7042
ABHD17C	14.8057	13.3775	14.4765	16.8732	15.3306	11.7536	12.5179	11.8302	13.2597	12.0849	14.9808	15.0276	14.3373	14.9345	13.2241	12.8256	11.8776	12.8932	11.0714	10.4082	14.2992	12.3672	11.2264	12.4026	13.1786	10.943	12.9002	13.3731	12.279	11.569	12.2765	12.6443	12.7352	12.981	12.5545	12.4054	12.158	15.2911	14.4091	15.5369	13.2918	13.4266	12.332	13.8327
ABHD2	13.1225	14.2792	13.3316	14.0071	13.5495	12.259	11.4355	11.7553	12.1333	13.3375	12.1926	14.1127	14.0849	12.3966	11.9444	13.0853	11.443	13.2898	12.0267	12.7398	12.5172	11.9465	13.167	12.2281	11.9887	12.5204	11.2933	13.509	12.3559	12.9956	12.5308	11.7688	12.7193	12.4957	12.5162	12.5693	12.1733	11.7048	11.0322	14.8368	14.8185	12.2096	12.8952	13.8579
ABI1	18.417	17.8535	18.5981	20.8077	17.1336	18.4914	17.541	17.4483	17.1865	18.184	18.1004	18.2052	19.3111	18.4066	16.9833	17.6939	17.2923	17.2672	17.8554	17.0208	16.7054	18.2214	16.8696	17.5877	17.5861	16.8977	16.8013	18.1638	17.5098	17.7637	18.3578	18.0664	17.9756	17.9312	17.7944	18.1156	16.4902	17.1788	17.057	17.691	16.991	17.3026	17.3069	18.5305
ABI2	14.249	12.8018	14.9986	15.9773	13.5407	12.6955	12.7458	13.3532	14.6089	13.6236	13.0471	13.711	13.9351	13.9635	13.5111	14.1196	14.7481	14.5224	15.4742	11.8494	14.1785	15.4401	13.3545	11.9573	13.0529	12.9196	14.6567	13.1222	12.3225	12.923	14.3694	12.0396	14.1145	14.1221	13.4838	14.6065	12.7515	13.1582	11.9335	13.7774	14.6853	13.9582	14.415	15.6451
ABI3	15.1949	13.7275	15.8436	16.4425	14.2478	14.4956	16.2426	14.8733	15.4484	16.1189	15.2539	16.4301	16.3456	15.5418	12.233	16.0471	13.7663	18.1477	14.6472	15.8971	14.4404	17.0215	15.2869	14.3441	12.6692	14.486	13.6413	12.7613	13.7005	11.0748	15.2645	15.2695	14.9426	14.9752	14.7249	15.0489	15.0217	13.8785	15.3054	14.742	12.1214	11.6139	10.7351	12.9325
ABI3BP	13.4537	17.1378	14.4319	16.5658	13.2037	14.2769	17.8242	11.8067	16.1425	17.6342	15.1989	16.051	15.0046	17.9391	11.3977	12.37	15.2505	12.7942	16.8979	17.1876	12.7926	16.7139	16.3348	16.8386	15.4632	15.4057	15.5612	17.5682	14.2715	15.9927	16.9149	17.1413	16.0625	17.3962	16.93	18.2482	13.9338	14.096	13.8521	11.9109	11.4752	10.5046	11.6607	13.1487
ABL1	16.0859	13.5724	16.128	14.2486	15.2983	14.8212	13.7036	14.4472	16.4087	15.4987	15.2216	13.7379	16.7917	15.7652	14.83	14.1736	15.4418	16.4445	16.157	13.6563	14.1903	15.1907	14.3952	13.4129	12.9242	15.2898	14.8568	12.782	14.4273	12.1738	15.8554	15.5478	15.2675	16.534	16.5104	16.5644	14.3344	14.1978	13.6302	13.5085	14.5109	15.4593	15.1489	16.8681
ABLIM2	14.3299	13.5789	13.8348	16.1549	13.3764	11.6237	13.2589	13.7411	11.9758	12.8984	14.3969	13.6083	14.0927	14.5779	12.2623	12.0835	12.6137	15.0171	13.3092	12.2638	11.993	11.3443	13.75	11.842	14.0714	13.2674	12.9793	14.2972	10.9398	12.4925	13.4835	14.2597	15.09	16.6547	12.6217	13.5926	13.8442	10.9829	11.4692	12.4594	12.0578	12.1093	13.4997	12.5881
ABR	15.876	16.3375	16.162	17.5266	15.0676	15.7476	15.9893	15.5282	16.2806	17.1171	16.0241	16.7432	17.2467	15.8894	15.9072	14.5832	14.9782	16.6248	14.8035	15.0529	14.6908	14.3658	14.1292	15.0072	16.2956	16.0827	14.9632	16.637	15.1362	15.1184	15.7492	15.1543	15.9506	15.4846	15.3343	15.5959	14.9124	15.2961	15.2495	15.5492	15.511	14.8786	15.7753	16.1269
ABRACL	18.8861	17.0195	18.5067	14.1133	18.9911	19.4784	16.2583	19.5909	17.9673	17.6366	19.915	17.8238	15.6151	17.9689	17.7617	11.7529	18.3681	11.8689	15.7574	15.3782	17.4261	12.9909	16.728	19.5659	19.6647	17.1522	17.0258	16.8635	20.1958	19.8742	16.8925	15.865	18.9561	17.7403	15.6991	16.2964	16.7696	16.2427	15.5375	18.1624	19.2851	16.8468	18.4899	20.6039
ABRAXAS2	14.9711	14.8963	16.4617	14.4157	15.2976	14.8472	16.1273	15.0926	15.6291	15.6132	15.0248	16.2993	16.1074	15.287	14.3399	14.7103	15.1	16.8434	15.071	14.5235	14.1831	15.0346	15.0977	15.8726	15.6809	15.0919	15.1658	15.9062	15.284	15.5589	15.7562	15.6856	15.5667	16.1219	15.5065	15.5433	14.9815	14.0331	14.6789	14.3548	15.9051	14.9892	15.3068	16.7999
ABT1	15.4771	13.0222	15.5174	14.0158	15.7478	12.5357	12.2632	14.5917	13.1219	12.7245	15.2593	14.3262	13.1514	15.437	14.5434	14.0532	15.0257	15.3456	14.3347	12.0007	11.6018	11.8676	13.8035	12.6068	16.5342	12.8201	14.699	11.9551	13.6886	11.5729	11.6246	13.6388	14.2171	12.9173	12.022	14.1889	10.9545	14.1794	11.7227	12.8696	13.4915	15.6106	15.2042	16.9555
ABTB2	12.987	12.7602	12.8529	14.1529	12.074	10.8241	12.1649	13.8982	12.8609	12.159	13.4819	14.6915	13.5188	12.6332	13.8722	12.1619	10.8243	13.2637	11.8162	11.7834	12.6469	12.0631	11.3637	13.174	14.5483	11.4159	12.6094	12.2314	12.5924	9.56922	12.8018	12.5554	12.2214	16.41	12.9146	13.2724	11.0622	11.125	9.09313	13.2608	11.7723	11.0094	13.8365	14.8955
ACAA1	17.6199	17.1988	20.8119	14.5547	17.8181	18.6305	18.2443	17.6817	17.4096	17.5952	17.3846	18.3776	19.4139	17.0756	18.4721	17.7555	16.8878	17.7082	17.4838	17.2718	17.81	17.0291	17.0416	18.9703	18.0378	17.5655	17.5195	18.1872	17.9794	18.6134	17.9639	18.8045	18.0795	17.6249	17.6405	17.6084	16.957	17.4233	17.4974	18.0886	18.0051	18.0534	18.4922	17.9803
ACAA2	18.739	18.6629	19.9757	19.7877	18.4164	19.9041	19.9402	19.4638	18.8131	19.5822	19.3239	19.6213	19.1139	19.8965	19.415	19.7526	18.6283	19.9212	19.5513	19.2725	19.5651	18.8328	19.6465	18.457	19.2186	19.5228	19.1832	19.7369	18.9114	19.2529	20.0386	19.2684	19.7274	19.6665	19.0676	19.2289	18.6867	21.0468	20.1235	21.8865	19.6622	19.8238	18.3845	18.4109
ACACA	15.6164	16.1587	16.3289	16.7528	15.9025	15.2539	14.7687	15.3811	14.9654	14.6345	14.8977	16.3961	16.0751	14.58	15.2877	15.3811	16.331	16.0371	14.3712	14.7579	15.3864	14.774	15.6753	15.7154	15.5943	15.2411	14.7495	14.2008	14.6249	14.9844	13.9789	14.5806	14.9371	14.8426	15.173	14.5073	15.3169	15.3955	14.7259	15.1229	16.0414	15.2417	16.7765	16.9694
ACAD10	15.5199	14.8584	15.8991	15.7647	14.4488	14.5635	15.1209	11.8634	14.4066	15.1661	15.4321	16.4322	15.7668	15.452	14.744	13.1185	11.7655	16.1057	13.8934	13.877	15.0569	12.2362	15.1159	12.8352	14.3917	14.249	14.8688	15.0503	12.8999	13.5904	15.9951	14.4973	14.5318	14.9424	14.7384	12.6765	13.5276	15.0601	14.4931	15.5638	12.9362	13.857	17.7948	16.193
ACAD11	12.4865	13.1796	13.3798	13.8541	12.1451	10.948	11.7768	13.5433	11.8336	12.8657	13.2	13.431	12.4579	12.8405	11.6429	12.727	12.4285	12.4775	11.6359	10.5217	10.5019	12.13	12.1092	12.945	12.8286	12.8302	12.5132	13.26	11.1536	13.0646	12.8342	11.2425	14.1038	12.4669	14.1272	12.6855	12.2785	13.1467	10.8689	10.3233	13.6086	15.4024	13.8382	12.9848
ACAD8	18.2087	17.2441	18.5055	19.0526	17.9924	17.1562	18.7981	17.647	18.2355	17.8353	18.7513	19.0005	19.8544	18.5371	16.4922	17.508	16.2015	18.314	17.1662	18.0648	17.5941	16.6661	16.6962	18.5416	16.7946	17.667	17.4911	17.8233	16.9989	18.3464	17.2087	17.0752	16.5583	17.4492	17.0764	17.6023	17.2142	17.8264	17.7924	17.747	17.9085	16.8849	18.0818	17.3785
ACAD9	17.9485	18.0165	17.9442	18.6697	17.4756	17.1458	17.9169	17.5294	17.8423	17.1541	17.6256	18.4355	18.0434	17.6567	17.5778	16.6749	16.3878	17.5386	17.4811	16.8249	17.2088	17.338	17.3293	17.6074	17.5761	17.1665	17.4341	17.4463	16.2675	17.3784	18.0002	17.1042	17.2961	17.1763	17.0914	17.16	16.3055	17.1269	16.8124	17.164	17.4615	17.7268	17.788	18.0356
ACADS	17.1419	17.6819	17.1552	16.3756	16.338	17.3515	19.8459	17.2367	16.2453	19.0732	18.4965	19.3599	17.761	19.0159	17.9744	16.8147	16.5028	17.7302	17.7945	18.6214	16.6861	16.6311	18.5706	17.3163	17.1843	19.0426	18.1122	18.7069	15.9872	16.7324	18.1891	18.4692	17.0275	18.6923	17.7973	18.2963	17.3728	17.828	19.1146	18.3842	17.7342	15.9332	18.1437	16.0485
ACADVL	18.1128	18.674	19.2611	19.4428	17.5749	17.8198	18.9967	17.9596	18.65	18.8393	18.963	18.2897	19.1901	19.0623	18.3169	18.7702	17.0348	19.2984	18.4908	18.7208	18.2317	19.0734	19.1471	17.3983	17.2738	17.2219	17.4811	18.4445	16.2558	16.7388	18.8028	18.6112	18.3313	18.9079	18.3397	18.7074	18.2355	18.8404	18.8025	19.3642	19.372	18.2396	19.266	15.6554
ACAN	12.9582	15.0428	15.1471	15.211	14.9481	13.6284	13.489	11.8661	13.902	12.1706	12.8957	13.7827	13.0257	13.0293	10.8945	13.5049	14.6448	14.0796	13.8464	10.9407	12.9893	14.9625	14.3692	12.8206	12.6016	11.8969	12.412	13.2348	12.3284	12.511	15.8248	13.5577	15.9008	13.6762	14.9068	12.2635	11.4125	13.8789	11.0377	10.6439	12.7925	11.6943	12.4613	13.5358
ACAP1	16.1963	16.3116	16.305	15.1724	14.0338	13.6923	13.4041	14.2692	12.6732	15.4879	14.6812	14.1761	15.9612	16.1871	12.1172	14.8129	15.2717	15.7891	13.1993	15.3808	14.1563	15.7875	14.7898	16.6855	13.3491	13.437	15.8403	13.3617	15.47	12.4947	12.3737	16.4865	15.2232	16.2535	13.9509	13.7509	14.436	12.8341	15.4514	14.533	12.8385	12.5641	11.6528	12.6219
ACAT1	18.9986	19.1964	18.1474	20.2331	18.9476	19.2624	20.2161	19.644	19.7715	20.159	19.6665	20.2344	19.1215	20.321	19.2701	19.8384	17.6181	19.4388	19.4178	19.7067	18.938	18.6855	18.625	20.0871	18.8495	19.3165	19.4088	19.8574	17.9085	18.5397	19.4411	20.0138	19.3009	20.1887	19.4868	20.0869	18.5879	19.1207	19.3401	18.9943	18.5097	19.7617	20.2438	19.6394
ACAT2	17.9343	18.7275	17.6575	17.5826	17.6185	18.8207	16.7795	18.017	16.9026	17.4831	17.5631	18.1642	18.4472	16.8867	17.4953	17.9328	16.8943	17.0743	16.3572	17.6764	18.226	16.418	17.5456	17.9366	19.4671	18.9549	17.8601	17.2057	18.0744	17.7212	17.4542	18.425	18.8959	17.5959	17.5877	18.023	18.3517	17.064	18.2583	17.995	18.6923	20.2631	18.5281	20.5048
ACBD5	16.399	15.5353	16.8249	16.8703	15.777	15.5459	15.2612	16.0359	15.4812	15.4013	16.0113	15.575	17.1875	16.1606	15.5821	15.3812	16.0325	18.0456	16.0094	14.669	15.3281	13.4913	16.3561	11.8296	15.6796	15.4621	15.5441	15.1069	13.777	14.3007	15.438	15.2167	15.169	15.5709	15.5521	14.6685	15.9153	15.1868	15.5878	17.0157	15.5978	16.275	15.5861	17.117
ACBD6	12.8995	13.5945	19.047	14.5753	16.3298	15.7096	15.1537	15.54	15.4128	13.848	12.3025	14.4819	13.5665	13.4738	16.6477	11.4725	17.3274	12.5359	11.7622	14.6065	10.9042	12.7756	12.3841	12.1248	16.336	15.2647	16.2629	16.1892	14.5412	12.9346	15.257	16.9291	12.6061	14.344	12.3897	16.6675	12.032	14.7256	14.0865	11.7507	16.7734	15.6004	15.1661	15.7936
ACE	16.2659	15.8163	16.95	16.7411	14.6529	14.6191	16.1728	15.1345	15.9601	15.443	15.0032	16.1371	16.298	15.369	15.1861	13.6363	14.2442	15.5488	14.4898	15.6541	15.185	17.0179	14.4421	16.0678	14.8965	15.0347	15.3214	16.052	15.3638	15.9363	12.6583	15.175	14.4542	15.8433	15.0391	14.8064	15.0085	14.5733	16.9941	13.5033	12.3072	12.4218	13.0782	12.9576
ACIN1	13.5692	13.5986	13.7853	15.4627	10.512	13.1821	12.4512	12.6329	13.1568	14.0455	12.8526	14.6934	13.0318	12.9331	12.2631	11.0007	12.7382	11.7529	12.4853	11.1583	11.9314	13.399	10.1255	12.8734	12.8902	12.4103	12.7717	12.9658	12.9541	11.7751	14.0433	11.9707	14.0678	13.8443	14.1351	13.4748	8.99701	8.49117	12.0169	12.6241	10.7048	14.4188	13.5778	11.9379
ACLY	19.0202	19.767	19.6397	19.0676	18.4808	18.8139	17.9041	19.11	18.6845	18.557	18.519	18.9084	19.5965	18.3539	18.7881	19.1367	18.7948	19.3562	17.6	18.2784	18.5981	18.7091	18.6592	18.9399	18.9182	18.9675	18.635	18.5596	19.2642	18.967	18.6843	19.356	19.0992	18.9321	18.948	18.5224	18.7662	18.8618	18.5762	17.8352	19.204	19.2299	20.0007	20.4187
ACO1	16.9922	17.679	17.3259	17.6101	17.2172	17.8774	17.8756	17.6134	17.4288	17.7666	17.9566	18.7711	17.2452	17.6789	17.1252	17.5511	17.0574	17.3631	17.7408	17.8516	17.076	17.722	16.8545	18.1126	17.0619	17.8979	17.6058	18.3897	18.1587	17.788	17.295	18.3217	17.5782	18.0329	17.9908	18.2345	17.5931	16.8356	17.8342	16.6637	16.3762	16.7063	17.5928	17.7334
ACO2	17.8336	18.9925	18.6347	18.2495	18.1224	18.9855	19.7599	18.6662	18.9712	19.6459	19.266	20.1705	19.1533	19.7363	18.0953	18.2273	17.5259	17.635	18.7783	19.0802	17.8423	18.1555	17.9394	19.1998	19.2606	18.9196	18.9763	19.498	18.0433	17.7632	19.1359	19.2101	18.6771	19.3805	18.9205	19.7879	18.1971	18.0866	18.6376	17.29	18.7709	19.5417	18.5453	19.1354
ACOT11	13.2928	16.338	13.2194	15.5809	15.1799	15.7703	15.1191	14.0916	13.6872	15.3929	15.4691	16.2547	15.6079	15.4219	14.4769	14.3696	13.7556	17.5737	14.5548	14.5763	14.2142	11.4189	14.5763	12.5076	15.1617	14.5507	15.0814	15.2455	15.3162	14.9408	14.3235	15.7943	14.4354	14.9007	13.5699	14.9859	15.1467	14.1561	15.3212	14.583	14.5823	14.6861	14.9807	14.8522
ACOT13	18.2865	19.0361	18.7413	18.9841	18.1978	18.9825	18.8586	16.3577	15.6938	18.9052	19.533	14.7269	18.3519	19.6418	18.4964	15.0743	13.1714	12.4985	12.1542	17.4308	17.3426	17.2195	13.6158	16.836	18.6548	18.5585	17.3843	18.8904	19.0661	18.7825	18.8462	18.1135	15.3406	17.5412	17.4352	19.3137	17.3004	17.9307	16.0939	17.2382	18.8384	18.207	18.4199	17.3074
ACOT2	17.6835	18.7825	19.351	18.9262	17.9818	18.4382	19.1996	18.175	18.8643	19.1764	19.1556	19.8263	19.5467	19.1885	18.3712	17.5215	17.332	15.5474	19.0879	18.3723	18.0589	19.2927	18.4815	18.7869	17.3245	18.0125	19.1405	19.523	18.0754	17.5866	19.1877	18.7462	17.1026	19.1236	18.7729	20.0446	18.0863	18.5598	18.0705	19.1768	17.6578	17.2118	18.0267	18.1192
ACOT8	16.2672	16.6947	16.0384	19.3504	15.966	16.1996	15.6726	14.7816	15.5701	15.8263	15.7173	16.4619	15.7793	15.1838	17.0382	16.2697	16.8991	16.1961	16.8745	14.9241	16.3178	13.9626	16.304	16.4563	16.9986	16.4193	16.8188	12.5627	16.075	17.2745	15.7549	15.4009	15.7933	15.1128	15.3116	15.7385	14.9898	16.504	15.6973	16.947	16.8479	16.6104	17.6406	17.2247
ACOT9	17.8852	17.6853	18.9853	20.3423	18.2204	17.5462	18.6928	17.8336	18.4306	17.8417	18.3713	18.3423	18.9197	18.1154	18.2433	17.9026	16.4788	17.7305	18.4368	17.6494	17.7719	18.6743	17.7109	18.1104	17.7422	17.5017	18.1918	18.0676	17.1105	17.7076	18.4021	18.0028	18.1801	18.8966	18.0404	18.4509	17.3092	17.7354	17.6683	17.2411	19.3629	17.7548	18.3645	18.6575
ACOX1	16.9249	15.7759	18.3676	17.8153	17.0723	17.8947	16.2535	16.5886	16.3142	16.4212	16.6854	17.3681	17.4651	16.6815	16.9147	16.8587	17.8216	16.9986	16.3974	16.7396	16.7209	15.9047	17.2868	17.3162	17.6499	16.7969	16.767	17.5066	16.3928	17.3137	16.4426	16.7198	17.2714	16.9602	16.374	16.3027	17.7442	17.6875	17.4511	17.0075	18.048	18.0613	16.7312	16.9815
ACOX3	15.7987	12.1359	16.6156	17.2916	14.8197	13.9362	14.9141	13.4883	12.7958	14.4915	15.3424	14.3654	17.3804	15.5877	12.8473	14.1772	13.7663	13.7272	13.7021	13.9985	14.05	14.7153	14.2484	15.2144	14.0358	13.7888	14.0805	13.5936	13.7642	13.6304	14.4283	14.0453	12.9634	13.1244	13.7793	13.8246	14.0462	12.9189	14.0116	14.5778	14.4311	14.0355	13.8863	14.948
ACP1	15.8677	16.8117	19.1593	17.0369	15.7659	16.8447	16.8737	15.4869	15.4913	16.7873	15.1242	15.8198	19.1255	15.9157	16.1093	16.6419	15.6184	15.3362	15.8151	15.3025	14.9207	15.8768	14.5805	17.1646	16.7629	16.9433	16.287	15.9799	16.7552	17.2034	16.8107	15.753	15.7446	16.7662	16.3014	16.4407	15.6707	15.175	15.8602	14.1129	16.819	15.2818	15.1966	17.5176
ACP3	14.3587	18.9385	14.8698	14.7412	15.6026	14.8479	15.4728	14.3452	13.7699	16.1017	15.0832	17.0172	16.5433	14.4959	13.2671	13.6936	13.3806	12.8758	11.8995	14.7987	13.6988	14.1037	14.5155	15.048	13.6147	14.136	13.4884	14.0771	15.0531	14.47	12.5071	15.3598	14.53	13.0762	14.4224	14.413	15.279	12.76	14.1319	12.3028	11.8607	10.6832	13.328	12.9102
ACP6	14.8741	15.2146	14.8454	14.3562	16.1755	13.7833	13.5365	13.3609	13.4384	14.8279	15.3366	15.274	15.8253	14.2037	14.0208	10.867	13.0773	13.4038	12.8179	12.7938	13.8862	14.7145	14.5463	14.5455	14.9915	14.2521	13.8932	14.019	15.9226	14.2371	14.4152	14.3869	13.0352	13.0487	13.2608	14.1162	13.6966	13.1382	13.6754	13.9118	14.1568	12.4889	14.3154	16.1685
ACSF3	16.4329	16.6456	17.0136	18.3818	15.5736	16.0323	16.9743	16.3046	16.7876	16.8312	17.297	17.8688	17.402	17.3469	15.9293	14.8978	15.1084	17.2982	15.5444	16.2277	15.3809	16.1266	15.614	16.1122	16.6271	16.1385	16.6577	15.8449	15.0459	16.1001	16.5867	16.5474	16.5726	16.801	16.3227	16.7038	15.262	16.1035	16.0588	15.7972	16.709	15.9781	16.7593	16.5341
ACSL1	17.9297	17.8952	19.9376	20.2211	17.9954	16.8617	17.4529	17.9422	17.8142	17.2636	18.1522	18.3051	19.7361	17.4996	17.9563	18.1556	17.8274	19.6942	18.7458	17.518	17.4013	19.2763	19.6893	19.842	17.9312	18.5109	17.2829	18.613	17.0204	18.7556	17.2994	17.2615	17.4914	17.9078	18.0041	18.2102	17.9101	18.2854	17.383	18.6758	19.985	19.2874	18.7639	18.6488
ACSL3	17.8868	18.0935	19.1696	18.7752	18.4434	17.3984	17.8097	17.5737	17.8933	17.6906	17.4596	18.2084	19.0937	17.3643	17.9798	18.6826	18.8267	18.6603	18.4818	17.2719	17.8739	18.4468	17.9229	17.9755	17.5583	17.3063	16.9382	17.655	17.0872	18.3235	17.763	17.6182	18.161	17.7831	17.6216	17.6226	17.9583	16.5917	17.7226	18.6048	19.2267	19.2519	19.4537	20.037
ACSL4	16.1519	16.9505	17.8961	18.2111	16.0322	16.3046	17.0083	16.6686	17.0863	15.8289	15.9484	16.5475	17.7906	15.3717	16.612	17.1906	17.6118	17.2803	16.5502	15.4892	17.0962	17.1035	17.225	17.1427	16.9125	15.5998	16.1774	16.7992	15.6477	16.5038	16.5556	15.9512	16.3708	16.7761	16.4867	16.1967	16.4666	15.9197	16.1215	17.0657	17.006	17.863	17.1708	18.4297
ACSL5	17.6001	16.2698	17.8241	19.2668	18.8511	17.5563	17.2263	17.2332	16.7597	18.4477	18.7141	18.8699	18.7424	18.334	18.438	17.8715	17.5222	19.4281	17.3991	17.152	17.5769	16.3412	18.3967	17.7796	18.7607	17.9898	18.4182	17.5282	16.9902	18.3866	17.7141	18.2331	17.7534	18.029	16.7993	17.2736	18.3676	18.6612	17.8938	18.3457	19.5046	14.3756	18.2291	19.0159
ACSM3	16.6036	13.625	13.1288	15.3705	14.8355	13.0983	15.9202	15.0626	14.0713	16.4277	16.5497	17.0008	16.6238	16.5555	14.7097	15.4318	13.8231	15.3231	13.9703	15.7694	14.0994	14.3975	15.0703	17.0765	14.7518	15.4781	16.1246	14.7173	11.5986	11.8503	14.2942	15.713	15.5997	15.3473	14.2776	14.6306	15.2777	15.0795	15.0203	13.6824	13.3774	13.274	14.4004	13.3721
ACSS1	15.5951	16.6128	15.5133	17.2527	15.518	15.6617	16.5236	15.2331	14.7458	16.44	16.5244	16.1703	17.3665	16.5103	16.513	16.4402	16.5679	16.5408	16.2129	16.6157	16.0169	15.1684	16.5053	16.3486	16.4317	15.3664	16.1116	15.5481	15.2994	16.8727	16.0432	16.5932	15.0512	16.573	15.7986	16.2632	15.9621	16.3295	16.1734	15.6119	16.5704	16.9925	18.8711	16.1417
ACSS2	17.975	17.4336	17.6033	18.9229	16.6108	18.018	18.0989	17.1876	16.6938	17.8513	16.7106	18.8791	18.4017	17.1358	17.246	17.2136	17.5508	17.0308	17.1966	17.5599	17.1732	16.6624	17.5984	17.7559	18.4642	18.5912	18.3641	16.9019	18.4135	17.8101	16.7713	18.124	16.8251	17.9267	17.404	17.5448	17.7088	16.034	17.7122	17.2059	17.5735	18.139	17.8842	19.582
ACSS3	14.5427	12.3865	16.5731	14.3983	13.3745	13.1332	15.7274	12.2251	15.6013	14.7353	14.3015	14.8528	15.1672	14.5496	17.3227	15.5262	11.8769	13.2706	14.8424	13.78	12.4635	14.3997	12.6861	16.3003	11.7876	12.4154	13.2672	12.8705	13.7787	12.2984	15.6696	14.2296	15.0995	14.6234	15.3417	14.7359	11.9147	12.8191	13.2874	11.7999	12.7145	12.7089	11.2402	12.7228
ACTA1	20.7813	19.5453	20.4462	24.1325	20.1517	20.9672	19.9551	19.9458	19.4975	20.025	19.4692	21.1656	20.2248	20.1298	19.9632	19.4618	20.7991	20.9635	22.1542	18.1021	19.371	22.7936	19.914	21.478	20.2543	20.7452	21.3561	23.6887	21.9525	21.2146	22.5157	20.0411	19.5349	19.0202	21.8637	23.7859	18.374	19.4734	19.8464	19.4896	20.091	19.0371	19.4127	22.7322
ACTA2	22.3015	22.5751	22.4948	23.0849	21.3106	22.5613	21.9825	21.5662	22.7736	21.9952	21.9443	21.9062	22.1469	22.6945	20.8797	22.3104	21.9928	20.9642	24.2908	22.5432	22.2019	24.4345	21.8184	22.6604	21.6228	22.978	23.6053	24.8733	21.8272	22.2837	24.6963	22.7813	22.7494	24.8635	24.2768	25.7158	21.038	21.958	22.1065	21.4539	20.5171	20.9048	21.0466	23.5974
ACTBL2	23.15	23.9713	23.186	24.7501	22.3745	24.106	22.2095	22.9824	23.3422	23.1158	23.255	22.3376	22.2865	23.4138	22.8742	22.2738	22.9415	22.9894	23.5845	22.9894	23.1491	23.4323	21.5044	24.1353	23.2773	23.0569	22.9929	24.7658	23.412	23.9855	24.6574	23.1051	23.3128	24.7902	25.0019	25.1362	22.2655	22.6371	23.3582	23.1388	22.749	22.2196	22.9586	24.928
ACTG1	16.3594	18.4675	16.6315	16.8377	14.9837	18.0094	18.197	16.6534	17.0492	17.1925	18.1634	13.8305	14.0502	17.3251	16.9336	16.4042	13.851	12.7065	14.7596	18.0268	16.3237	16.8959	13.4211	17.424	17.7317	17.4117	16.141	17.6321	16.9242	17.4114	17.5489	17.2686	15.6808	16.9611	16.5462	16.6934	16.6183	17.7465	17.9134	17.7534	17.4003	16.8439	17.3239	18.0397
ACTG2	19.743	20.1082	13.4678	21.4078	12.2829	18.0842	19.0504	21.9914	19.7129	19.8769	20.8599	18.7127	19.158	22.563	21.4618	12.7416	18.5552	14.2312	18.032	16.2767	16.79	12.8962	12.3696	21.5099	22.1547	17.9455	19.7749	21.4882	19.6553	20.3692	21.2926	20.7212	12.2947	12.8899	21.7871	18.7159	19.4938	16.6795	15.6981	18.5822	12.5745	12.2261	11.8231	17.5068
ACTL6A	18.0981	17.7152	18.0699	17.7934	17.4923	17.8764	17.9438	17.9081	18.1343	17.7833	18.0697	17.8471	18.5837	17.9878	17.9273	17.4605	17.3311	17.826	16.8519	17.4133	17.5689	17.7111	16.8441	18.0717	18.2443	17.5323	17.4254	17.3994	17.8914	18.3489	17.9054	17.349	18.1864	18.09	17.9341	18.0261	17.305	17.834	16.9406	17.6804	18.1315	17.8185	18.1407	18.1167
ACTR10	16.6232	16.5888	17.8592	17.2808	16.7026	16.5276	16.9174	16.322	16.9454	16.447	16.3641	17.6673	17.7734	16.7671	16.4462	15.2747	15.3522	16.5994	15.5429	16.0817	15.7954	15.4871	14.1301	16.6395	16.1697	16.4918	15.9833	17.1248	16.813	16.5639	16.9943	17.5566	16.9959	16.8512	17.4788	17.9087	16.0167	16.1515	16.3027	15.8229	15.6617	16.6481	15.8845	17.4305
ACTR1A	19.2702	19.9125	20.3961	20.4844	19.0009	19.6269	19.4379	19.4386	20.0724	19.8987	19.4004	20.4954	20.465	19.6976	19.3221	19.1118	19.0257	20.1537	19.466	19.5407	18.7274	19.9672	18.26	20.0108	19.1769	19.111	19.575	19.5664	19.1638	19.6692	19.7524	19.9481	19.6132	20.0007	19.9373	20.5648	19.1592	18.7947	18.9253	18.9315	18.7928	19.5164	18.5532	20.0091
ACTR1B	16.1014	15.6194	19.6187	15.3071	16.5251	15.7643	14.644	15.4511	16.0493	15.6491	15.7002	18.8505	18.1026	15.9302	15.8482	15.0991	13.796	13.4613	14.6321	15.1701	14.7362	12.9963	13.939	15.6848	16.0571	15.6596	14.0292	13.1646	15.969	16.2193	16.8141	17.3494	17.1008	15.817	16.6639	17.6019	13.7628	15.021	14.5087	14.132	15.3796	16.1006	15.5429	16.5832
ACTR3B	16.1702	15.5625	19.306	14.3898	17.6156	17.1684	17.8284	17.109	18.1161	17.1829	17.2729	17.1876	13.6699	14.412	17.3807	17.0284	17.9661	18.2214	18.0759	17.3567	16.0257	11.9422	17.358	18.2778	17.0977	15.8206	16.3155	13.4321	17.5271	17.7425	17.0665	17.9386	18.0576	17.2659	17.8919	16.9703	17.387	17.121	17.0245	17.2744	17.2713	16.0376	17.7298	13.4793
ACTR5	15.7482	15.1938	16.3503	14.8282	14.4853	14.761	15.5309	14.5515	15.4216	14.8331	14.4363	14.8717	16.7913	12.4811	14.8285	11.1227	14.221	16.9618	11.2024	13.5532	14.1877	14.6203	13.7073	12.5279	15.1567	16.2163	15.9206	14.4739	13.9071	16.4066	14.8767	14.3345	14.661	14.6563	14.582	15.2921	14.289	14.7593	13.237	12.7523	13.8239	15.3669	14.928	16.1603
ACTR8	12.7113	13.884	14.3507	13.5703	12.8676	13.2906	13.2879	12.8868	13.6882	13.9739	10.6781	13.3704	13.7382	12.8744	12.9679	12.3901	12.1376	12.4734	12.0149	14.4478	11.9164	13.5337	13.3728	12.6278	12.6373	11.4524	11.7768	13.1389	11.438	14.3065	13.6023	11.3345	13.0983	12.2047	13.4422	13.0603	13.1845	13.5839	13.542	12.0553	13.3747	13.8749	13.2917	13.0212
ACVR1B	14.8305	15.8294	13.5896	14.2698	12.6762	12.3675	13.4151	11.9644	13.3338	12.3042	12.4777	13.7753	13.2867	12.3307	6.51897	13.8201	13.5425	14.6532	14.7502	13.317	13.0996	12.5678	12.8672	12.3677	12.4509	12.0909	15.0944	12.9157	14.5888	12.832	11.3787	12.8306	13.1858	11.7789	15.0224	11.1567	12.2575	12.8354	13.6407	13.1044	13.3083	13.657	12.6822	13.4359
ACY1	17.264	18.3102	17.4433	17.6584	17.7632	18.0478	16.4207	16.7931	15.8752	17.6047	17.8798	18.4726	17.4486	17.2557	18.0382	16.9631	17.3997	17.7597	18.9527	17.2285	17.2501	16.2346	18.0945	16.2025	16.2681	17.3183	16.7021	17.7267	17.8269	18.2146	16.6192	17.5028	15.6628	16.7976	16.5162	16.5008	17.9449	17.4337	17.8266	18.8305	18.6298	16.1748	16.8808	17.5786
ACY3	13.8006	14.9069	13.6681	15.0264	13.7428	13.7729	12.6243	14.4516	13.0196	14.3302	13.8288	12.8859	17.7402	13.7834	13.4639	12.6359	14.2094	6.66295	14.4011	13.6743	11.3423	11.7967	13.3503	14.2512	13.0831	14.2489	11.8571	16.398	12.2348	12.9596	13.0137	14.5489	11.0144	13.7621	12.835	12.4996	14.3014	12.9502	14.9706	14.4805	13.0303	11.4019	14.1644	16.1549
ACYP1	15.2459	15.3839	15.2402	13.6982	15.1514	16.6545	14.4138	15.1948	14.6727	16.008	15.9075	15.932	14.451	14.21	14.7856	14.8599	13.9824	17.1572	16.9261	11.9906	14.5464	15.6211	12.8928	16.8157	15.915	15.7145	16.206	12.6136	15.91	14.8278	15.9774	15.3945	14.6708	16.8377	15.1262	16.6855	13.8996	14.9686	14.7146	14.4644	16.1141	15.4163	15.0122	15.3836
ACYP2	16.2831	15.3047	13.6008	13.936	15.653	15.5088	16.7186	16.3537	17.3058	16.3601	17.1431	17.0959	15.672	16.6708	15.2162	16.0091	15.8415	15.3266	16.4563	14.9985	14.4525	15.1861	14.7864	17.5605	16.3759	16.8177	16.9019	17.2661	15.7363	12.6601	16.4369	16.6517	16.5899	16.8232	16.829	17.1291	15.5259	14.1626	15.3881	15.1852	16.5152	15.667	15.6636	12.6599
ADA2	16.7026	15.2645	14.6552	14.0553	12.3072	14.717	17.9548	14.9018	16.9733	16.8537	15.2095	13.6705	15.942	16.0277	11.9158	15.545	11.7688	13.663	11.6672	15.3634	14.3657	11.371	13.3212	16.5076	14.3246	14.9629	14.9056	16.0359	14.9962	13.84	14.3078	15.5161	14.132	15.1229	15.3567	15.5753	14.7975	12.1074	15.7747	13.9426	12.0141	12.4266	12.5606	13.2254
ADAM10	16.9404	16.3446	18.743	18.4549	16.2345	15.541	16.3651	15.6863	15.8775	16.4762	16.5347	17.1658	17.4223	16.7297	15.9588	15.9112	14.9365	17.2659	15.6401	15.7919	15.6617	17.0818	15.8622	16.2867	15.5198	15.9923	16.2811	16.2586	15.1809	16.184	15.4725	16.8405	15.2941	15.6103	15.9965	16.0639	15.8063	15.8379	16.0351	16.0379	16.1073	16.2356	15.2804	15.7307
ADAM15	13.6379	10.4436	13.7762	13.7429	13.0673	11.0545	12.6877	12.7755	12.2078	12.5265	12.0397	13.285	14.197	14.5982	13.0937	14.6767	12.3686	13.7145	12.6896	13.9088	13.1882	14.5586	13.8681	12.772	12.4076	12.4488	12.1583	12.7302	9.0095	12.5231	12.216	11.2755	11.1264	12.0903	12.3884	12.0932	13.9404	13.589	13.6815	12.9737	15.1296	14.692	14.0339	11.7132
ADAM17	14.4677	14.8368	14.3052	14.27	14.8547	12.2493	14.1036	13.1523	14.7008	13.6501	13.8605	12.86	15.6527	14.3482	13.6756	13.9533	13.3647	14.774	13.2419	13.2849	13.8978	14.4636	13.5633	11.9012	12.8502	12.0111	12.8909	13.1532	12.9951	12.034	11.353	11.171	13.6312	14.3709	12.3272	12.7365	12.9053	13.6491	13.111	13.4511	14.2382	11.8733	13.539	15.1172
ADAM9	15.6314	14.3904	12.4678	15.4714	14.9003	13.481	14.7054	14.4399	14.5768	15.0038	15.1699	15.0778	12.5092	15.0249	15.1772	13.2364	14.581	15.8042	14.5846	14.1225	14.6925	15.2311	14.8013	13.9183	14.4058	13.4406	14.5586	15.3985	13.9306	14.452	14.4502	14.4107	14.262	15.0186	14.258	14.9421	14.1569	14.733	14.3809	14.4304	14.2783	14.7715	13.9867	14.5037
ADAMDEC1	13.2731	16.4226	13.4974	14.6433	12.8675	14.2959	15.6593	11.926	15.5537	15.5952	12.2682	13.2652	13.738	13.8901	12.7535	11.5899	11.5098	10.9375	11.9767	14.2841	12.386	12.7474	11.9665	13.0345	10.8681	14.6669	11.5262	11.9215	13.7767	13.3756	12.9862	15.089	14.9398	14.3506	14.1921	13.8478	12.1256	12.2695	13.7566	12.517	11.6407	12.4878	11.706	13.9346
ADAMTSL4	13.9306	13.524	13.4759	13.8462	14.4336	12.2678	17.4887	12.9783	16.8129	15.7111	12.9105	16.4754	14.2029	12.8438	12.2541	14.4463	14.056	13.5865	17.2228	15.2517	12.3209	16.5648	14.6401	12.7193	13.7231	14.0594	12.6193	18.2752	12.8152	16.3785	15.1337	15.281	15.2368	15.9006	16.0783	16.4584	13.7201	13.4289	14.8089	12.3027	12.7757	12.2398	14.0824	12.1176
ADAR	12.9865	12.3312	15.103	13.9787	15.9145	11.9823	12.5788	11.3534	12.905	12.4069	12.5517	13.9302	14.7262	12.6667	15.2551	11.724	17.2203	14.6007	12.1685	13.7897	17.1674	12.8005	11.6491	12.6653	12.6687	10.9943	12.9356	11.6151	15.5088	12.5169	11.8305	11.8386	14.4636	13.0053	16.5311	12.8038	15.8377	11.7005	11.5352	10.8757	16.2163	17.4924	16.9669	13.1042
ADARB1	15.08	12.3848	16.5815	14.1564	12.7462	13.6877	13.4121	14.0358	14.2794	17.1124	13.8014	14.0059	14.0926	14.4262	15.3298	13.0479	14.344	14.9606	14.1751	14.1992	12.7681	13.7922	13.68	14.2666	12.9714	12.616	14.0369	14.537	12.6395	13.0153	14.6173	14.8818	14.5795	14.7939	15.5084	15.2812	13.9964	13.8406	14.3222	13.2417	14.309	14.6949	13.9686	15.9276
ADAT2	19.6989	12.7711	14.9738	15.1691	13.1619	12.6147	12.5524	11.1816	11.5791	12.7566	14.4785	13.4952	13.7176	13.849	11.0755	11.4581	11.5321	13.1903	12.9288	11.066	10.8667	12.2199	11.3476	12.9512	14.8665	11.3864	12.7064	13.1147	11.8924	12.1792	12.117	13.0273	15.0819	13.4192	14.0486	12.0205	11.2851	12.2385	9.52453	12.1625	12.1456	13.1231	10.9373	14.6258
ADAT3	12.299	12.7407	13.0715	14.0876	13.7236	12.1337	12.2831	13.8677	12.9272	12.3987	14.7122	12.5358	13.7448	12.1349	11.247	12.6898	13.096	15.3001	11.2401	12.1831	11.2766	12.0556	13.8298	14.2661	11.6768	12.1771	10.6937	11.6718	12.7046	11.5577	11.908	12.5976	11.447	13.1279	11.5796	12.7153	12.1728	11.1066	12.3713	8.3677	13.716	13.1427	13.7326	17.2619
ADCK1	13.2824	15.0034	13.5719	14.2457	13.8305	14.0683	14.8303	15.7094	15.6404	15.6216	14.4321	15.0075	13.4074	15.2706	16.1538	12.5983	13.0454	14.5655	15.6087	13.3022	14.1918	12.4337	11.3602	16.7898	15.0083	14.6897	15.4862	15.1118	11.7562	12.8279	15.4355	15.3607	15.3886	12.6778	11.3708	15.4971	14.0739	15.6853	13.8223	14.8504	14.9353	15.7583	16.0098	16.2621
ADCY3	13.5667	13.3992	13.5443	15.9348	12.7363	12.5134	13.4545	11.66	12.1705	12.2692	10.8737	14.0655	13.7165	11.0235	11.3966	10.7423	11.622	12.967	12.9487	10.801	10.8352	12.1753	10.6618	12.3471	11.9141	12.169	12.8974	12.035	11.1708	13.2647	11.7019	11.9892	12.7156	12.625	12.5138	13.2823	10.0155	11.2426	10.0379	11.0361	9.67233	10.6877	12.0648	12.8385
ADCY6	12.8449	14.1284	14.9982	14.6367	13.4061	14.2297	15.4277	12.5614	12.9691	12.5781	14.1365	12.8986	15.4895	13.9393	14.8723	13.7463	11.9003	14.1316	12.4106	13.0732	11.3756	11.946	13.4883	12.2058	13.2558	12.944	13.6881	13.5399	11.8405	13.4205	11.7181	14.6967	12.6773	12.8888	12.0516	12.7936	13.7735	12.887	12.9349	10.4335	13.4068	13.0751	11.7961	13.5571
ADD1	16.6476	16.478	17.3836	17.9315	16.0256	16.5746	17.1335	16.0934	16.6673	16.8384	16.4671	16.9637	17.749	17.0489	16.0076	15.9657	15.8534	17.3191	16.4419	16.6255	16.1395	16.6317	16.3602	16.8803	16.7851	16.3401	16.5336	17.2898	16.3961	16.4178	16.4697	16.9924	16.5718	17.2511	16.7838	17.4022	15.9861	16.3923	16.0877	16.6836	15.8894	15.6436	15.5063	16.9086
ADD2	12.99	18.3746	18.0953	14.043	11.603	12.4385	15.5695	15.1162	12.5426	15.4652	15.1663	13.1204	17.1481	13.2356	12.312	10.9162	15.3112	12.7571	11.4243	15.6551	14.1336	13.0144	13.5211	17.2255	16.0061	15.7088	15.1302	16.0698	14.2703	13.0722	15.5597	14.8924	12.9344	16.5734	15.4934	17.0326	15.7171	11.3044	11.2401	12.0924	12.756	13.2524	12.6429	13.5728
ADD3	17.1823	16.6451	17.7007	17.954	16.0297	16.555	17.246	16.0733	16.773	16.7881	16.9837	17.6296	18.0617	17.3705	16.3324	16.8122	16.7111	18.0334	16.9172	16.9544	16.5086	17.6118	17.2336	16.7132	16.9718	16.6667	17.0191	17.3468	16.6291	16.8613	16.4334	17.061	16.9874	17.3994	16.7371	17.2468	16.1832	16.928	16.6711	17.1677	16.395	15.7215	15.8366	17.3555
ADGRE5	16.8416	19.2434	18.5833	18.3405	17.0318	16.5246	17.2726	16.741	17.0615	16.9831	16.7896	16.944	20.0787	17.0566	15.8838	18.1945	17.2653	19.1273	17.6032	17.3537	16.9168	18.2105	17.3529	16.0423	16.7413	16.3755	16.0508	16.6448	16.717	16.8069	16.568	17.0293	16.4426	16.6096	16.8681	16.8031	17.0491	16.6271	17.275	16.8575	16.1111	15.6975	17.0213	15.899
ADGRG1	14.0566	13.6575	13.0621	13.5048	15.2323	13.0441	12.6235	12.1674	11.5389	12.3418	12.9016	13.2529	13.9424	12.9604	12.8366	13.0572	12.6265	13.8196	14.3493	10.8975	13.7299	11.3902	12.0532	13.0878	12.4684	11.4533	12.2268	13.0338	11.255	12.3609	13.222	12.352	14.862	13.0531	12.835	12.1786	12.6634	12.7593	10.2636	12.171	13.5489	14.6434	14.2451	12.0268
ADH1B	18.2897	17.2444	17.5935	17.9074	16.1036	18.0837	21.5716	15.7633	17.867	21.3714	17.1764	21.5748	20.3553	21.3899	14.8135	18.4208	17.7998	12.6442	17.543	22.1337	18.0411	16.3972	18.3874	23.8072	16.6693	20.1009	20.3543	21.8196	18.8765	18.8602	19.2262	22.5869	16.3708	21.6428	21.2353	22.5074	18.0982	17.807	20.1674	17.6979	12.4701	16.6231	12.1742	19.0655
ADH1C	18.8369	12.9563	14.0425	13.8816	15.5572	18.788	21.2238	16.4002	12.1472	20.5118	17.6143	20.8141	21.2324	21.4105	15.7289	16.6324	17.9472	15.6946	11.5647	21.0275	17.5758	12.8374	15.8352	14.9425	16.1282	20.0468	20.3332	19.6407	18.387	12.5995	16.3793	21.6276	13.6677	21.2363	19.4881	19.8481	18.6027	18.1043	21.3621	16.3235	12.3977	17.7309	12.3691	13.3588
ADH5	19.0046	18.6989	18.6285	18.8296	18.6997	18.2373	18.8804	18.0943	18.2492	18.8754	19.3594	19.0663	19.7737	19.6542	16.6201	18.2275	18.4217	19.396	19.3632	19.413	18.4324	19.0956	18.369	19.509	18.1646	19.5099	18.6686	19.8123	18.8885	18.65	19.3258	19.5322	18.5524	20.214	19.2124	20.5804	18.2843	18.1238	18.8427	18.0483	18.6566	18.2024	17.5538	18.6105
ADH6	14.3616	13.3275	14.476	14.5177	12.9127	13.5684	15.6305	13.1558	11.9347	15.6796	16.3399	15.1792	14.9013	15.754	13.9259	12.6873	14.4962	13.5407	12.15	15.3271	11.8462	12.1566	13.4962	12.7339	12.9187	17.0156	14.2855	14.0616	13.04	12.7628	12.8067	14.2977	12.8124	15.5048	13.4695	14.2775	14.0186	13.8906	14.3493	11.7158	15.4463	11.9995	10.4715	14.0938
ADI1	16.8554	16.6409	16.9565	18.4326	16.7449	16.4229	16.016	16.3536	16.3372	16.3039	16.1075	17.0707	14.0332	16.254	15.32	15.2895	15.9323	16.9083	15.6319	15.2913	15.465	16.0311	14.9124	17.1467	16.9869	16.1351	16.5184	17.2289	16.3414	17.944	16.1601	15.9205	16.9483	15.282	16.4754	16.2458	14.4363	14.864	15.7775	15.2738	17.3393	14.5795	17.35	18.4294
ADIRF	17.4921	16.638	16.7283	18.6958	16.5466	17.0938	16.5428	15.6997	16.2803	16.8257	16.0074	16.514	16.2924	16.7158	18.5708	13.3388	15.8739	13.5473	17.2297	15.2667	15.9273	15.8185	15.1367	17.2242	17.0427	16.1311	16.0424	17.5004	16.6618	17.8012	16.7654	16.3687	16.3891	16.7898	16.208	17.3134	15.9191	15.774	16.2437	15.1609	17.4216	11.9987	16.6803	20.1067
ADK	16.6297	17.7505	17.196	17.5958	17.055	17.0329	17.3062	17.3439	16.7273	17.0726	17.0207	17.2172	17.5555	16.9262	16.6205	16.9876	17.5892	16.9594	17.2351	16.5443	16.6908	16.8958	17.0226	18.0833	17.2527	17.3115	17.0872	17.7203	16.4356	17.5156	17.1238	17.028	16.7758	18.0288	17.1857	17.4362	17.1613	16.1646	16.6988	15.9957	17.924	17.2961	16.4171	18.0181
ADNP	16.0778	16.3726	17.1025	16.498	16.4455	15.3495	15.9854	15.8282	15.8357	15.591	15.8648	16.2323	16.2545	15.666	16.4893	15.1043	15.4389	16.7739	15.4591	14.5163	15.4146	15.3955	15.7735	14.9243	16.2409	15.6442	15.6956	15.3558	15.4689	16.0306	15.6618	14.8723	15.6461	15.208	15.2471	15.5307	15.0835	15.8756	14.4486	15.067	16.0891	15.9208	16.1029	16.8745
ADNP2	12.534	12.2274	14.6341	14.6889	13.1722	11.9481	11.4144	11.801	12.2696	12.7537	12.2963	13.9406	12.9179	13.6004	12.1865	12.3668	11.1007	13.5191	11.3579	10.8984	10.7104	13.3853	11.3327	11.7301	11.3685	12.846	12.5114	13.2986	12.1459	12.6255	12.1702	12.7881	11.2689	12.7275	12.7912	12.9599	9.85934	11.5803	10.7736	9.11211	12.1549	12.7099	10.1934	13.6927
ADO	13.68	14.038	15.8944	14.6771	14.0789	14.4847	12.8535	12.9205	13.0654	13.425	13.5929	16.5872	14.6298	13.8564	12.9815	14.5048	13.8437	13.5973	13.8209	13.3118	12.7231	13.7352	13.5633	13.4685	13.3855	14.1444	13.302	13.7744	13.408	13.2945	14.23	14.3446	14.5775	14.9657	14.6604	14.7861	12.1994	13.5724	13.5336	12.2834	15.4148	14.0458	12.9826	14.5443
ADPGK	16.9042	15.8766	17.9055	17.1224	17.4531	14.443	16.1652	16.6933	17.3966	16.0296	16.9958	17.2443	17.1749	16.0678	15.5557	16.8733	15.8246	16.3263	15.8582	15.9714	15.8492	16.2871	16.057	16.6563	14.4067	14.4545	14.1786	14.1325	12.7666	16.2896	15.118	15.272	15.3075	15.2211	14.7404	15.157	16.0943	15.7493	15.3883	16.4779	16.8757	15.3417	14.565	12.513
ADPRH	14.6591	12.2533	13.4869	16.0709	14.2971	13.6711	13.0274	14.3335	14.9537	14.8213	11.7819	14.8849	15.0309	14.3306	10.6181	14.9561	14.448	13.9747	15.6646	13.1893	12.486	14.2609	13.9096	11.8695	11.5415	20.198	13.0243	13.343	14.0937	13.0165	15.2861	15.1959	15.0572	15.6777	14.8464	15.2005	14.4258	14.1206	14.3762	13.8188	14.6506	11.1846	11.5908	12.5339
ADPRS	16.3188	15.9623	16.403	18.1026	15.7079	15.4974	16.8277	15.8925	14.9664	15.3838	16.6184	15.1048	16.2673	16.7125	13.1214	14.5918	14.4125	16.5552	15.0858	15.4537	14.754	13.2826	16.0896	15.3171	14.3298	15.7036	15.4579	17.7001	15.3002	17.1234	15.4245	15.3894	14.7987	15.1746	15.7322	14.811	15.8288	15.404	15.1825	14.6974	15.6203	14.7785	13.8991	16.5414
ADRM1	17.76	17.655	18.0381	18.5158	17.5753	16.8737	17.3417	17.6521	17.3714	17.0572	16.7325	17.0358	17.4635	16.5776	17.4341	16.2873	17.372	18.0505	17.043	16.8992	17.5578	17.279	17.4307	16.9724	17.9522	17.0725	17.4215	17.2873	17.8889	17.3279	17.5905	17.436	17.2509	16.8261	16.6079	16.564	17.2547	16.9454	17.0499	17.1061	17.6028	17.8851	17.6557	18.1024
ADSL	16.6584	17.1088	17.7547	18.0645	16.5962	16.5088	16.953	17.1391	16.3962	16.4301	16.5498	17.1105	19.8345	16.5207	16.4488	15.6142	15.8594	17.2527	15.4767	16.5156	16.5705	16.2983	16.0867	16.7852	17.2162	16.5925	16.4967	16.7306	16.2085	15.8432	16.3853	16.9115	16.4374	17.4448	16.7773	17.4173	16.5309	16.296	16.4272	15.6084	16.6782	16.4416	16.4699	18.4
ADSS1	14.0537	17.3314	13.9076	15.1714	16.948	16.612	16.7903	16.4992	16.5021	16.8744	15.4841	13.5267	13.6734	16.0541	17.0206	15.3862	14.4008	13.3193	12.5546	15.1653	14.9016	12.4662	15.1995	13.75	16.6095	16.3069	14.8578	12.7484	16.9553	17.3986	14.625	13.711	14.5875	17.0565	13.2362	13.4071	11.9704	12.5212	14.9481	15.4351	15.9412	14.4094	15.9071	14.5183
ADSS2	17.8165	18.3711	17.4571	18.4498	17.8612	17.8949	17.8241	18.189	17.3526	17.4024	17.4101	18.5005	17.1202	16.7161	17.7027	17.3848	17.384	17.8172	16.2669	16.7812	17.3988	16.6905	17.2226	17.9452	17.6773	17.4372	17.3336	17.8123	17.9327	18.1518	16.8855	17.7321	17.1109	17.5824	17.3404	17.0969	16.5725	16.5394	17.0456	16.5162	17.7509	17.3062	17.6575	18.1841
AEBP1	17.8873	17.0372	18.7828	20.0606	17.6984	17.103	16.5395	17.792	17.6634	17.794	17.0487	17.6704	18.1504	17.6683	16.0626	18.1915	18.0944	16.7788	20.3857	17.2205	18.1349	19.3831	17.6231	18.1083	16.1696	16.8458	16.6663	17.5281	17.8573	18.9555	18.6872	17.4141	19.3852	17.6013	18.8082	18.1524	16.5155	17.2702	17.3885	16.2854	12.116	11.2113	11.1298	13.3239
AFAP1	15.1095	13.7779	15.8736	15.2605	15.7856	15.5141	15.4318	15.8657	16.0286	15.3096	15.2603	13.1859	15.4227	15.4055	14.9237	12.8049	15.2728	14.4311	15.4746	14.426	14.7087	15.8462	14.7336	12.768	14.4077	15.1048	13.8965	17.3612	15.2744	10.6808	16.0956	15.0108	16.0393	15.7205	16.1101	16.1025	14.2271	14.8334	14.3074	15.1495	14.4327	14.613	14.2331	15.7914
AFAP1L2	15.5595	15.0801	15.984	16.7225	16.2653	15.672	15.148	15.0498	16.225	14.7249	15.4517	13.2744	16.908	14.2405	14.5748	15.8313	15.3744	16.4472	14.9468	13.9092	14.8715	14.5671	13.4752	12.9031	14.4409	15.0019	14.1132	15.7179	12.9835	14.3273	15.3372	14.48	16.2692	14.9136	14.9026	14.7494	14.4194	14.8978	14.4342	14.8103	13.6817	12.6848	11.2183	13.0783
AFDN	12.9444	12.2582	14.0571	13.9037	12.451	13.4878	13.6407	12.5236	12.238	12.4985	15.337	14.5095	13.6358	11.7566	10.6705	10.5008	10.6022	13.1139	15.599	10.7059	14.5713	15.5396	11.0952	13.409	12.6157	11.9466	14.1299	11.9648	15.2313	12.2676	12.7575	11.392	11.4781	12.5967	12.9687	12.4665	11.0279	13.9286	12.0933	11.9634	14.8019	11.4764	14.0069	16.4023
AFG1L	15.4101	14.8393	14.0556	16.9862	14.5406	15.2637	15.6024	14.1594	14.4315	15.7933	14.9633	13.1701	16.5559	15.8669	13.8872	12.8813	13.5838	12.6648	13.4827	14.7336	12.9797	14.6997	12.4229	12.856	13.83	15.4438	14.4756	14.1629	13.1669	12.4546	15.3809	15.3006	14.0608	14.7304	14.7281	14.9444	13.6296	13.6392	13.8802	13.3791	13.6954	15.6091	15.8072	13.6358
AFG3L2	17.4777	16.6325	18.5744	18.5447	18.2278	17.7846	18.2258	17.4273	17.2899	18.393	18.5215	19.1333	18.3172	18.7481	18.4921	17.4506	16.6704	18.2594	17.5026	17.4943	17.2665	16.8504	17.5501	17	17.536	17.3267	17.2587	16.4675	15.4693	16.7471	16.6633	17.5645	16.8817	16.9608	17.1518	16.9907	16.4097	17.6743	17.4507	18.1002	17.9057	17.1064	18.7709	18.0632
AFM	15.3969	15.322	17.8308	15.569	14.0481	14.6231	12.3577	13.8082	17.4439	12.6586	15.1803	14.594	16.2737	14.5518	13.5753	11.1827	13.9939	13.1735	14.699	14.7672	15.0004	15.9407	15.1111	17.168	15.3281	15.7689	15.5951	16.9059	15.7963	17.0106	14.706	15.3331	14.7421	15.9333	15.5643	15.5201	15.3557	13.8972	15.9549	13.0361	13.1412	16.5145	15.5368	13.6498
AFTPH	15.0962	16.5827	17.8679	15.7614	15.7703	15.2504	15.982	15.2789	14.9849	15.8618	15.4022	14.3751	18.8186	15.3215	14.6783	14.902	13.929	14.2264	14.1484	13.8081	14.2778	14.0543	14.6315	15.2614	14.9675	15.7534	15.9003	15.0799	14.3438	14.3724	14.3819	15.1074	14.5691	16.6267	12.4796	14.0494	14.2387	14.5578	14.2399	14.6886	15.2751	14.6726	14.3705	16.0425
AGA	12.6145	12.9418	13.6389	14.2147	11.8552	11.9475	12.207	12.1883	12.3085	15.1688	13.0211	14.3176	14.4298	12.9665	13.2035	14.961	12.005	13.1447	11.4025	12.2573	11.7698	12.6156	16.0633	13.882	12.426	12.2153	13.0625	12.6716	11.0822	12.901	11.3984	11.9399	12.7108	12.6147	12.2652	13.0811	11.0713	11.5174	10.0735	10.2325	12.3377	11.6274	10.6769	13.4655
AGAP1	16.6832	16.6579	16.2253	17.1324	16.0313	16.4366	17.8029	17.5678	13.0283	16.4039	12.234	17.2507	16.0516	12.9204	16.2428	15.5879	13.8932	11.8283	14.6119	10.6294	15.082	15.6026	14.977	12.4114	16.9916	16.8822	16.1588	12.8578	16.8053	11.7164	16.4191	17.9072	16.1047	12.497	16.6103	17.4281	14.6052	11.4608	15.5607	14.3174	15.6467	14.0965	15.2269	13.4085
AGAP3	15.9116	13.3601	16.881	19.0266	15.7571	13.1581	15.2466	15.4533	15.8265	14.5833	15.0002	14.3665	16.0132	15.7571	14.5103	14.9444	12.8264	17.4016	15.8853	14.7508	13.4223	15.415	15.0645	15.0924	15.8014	15.0409	15.3933	13.9339	15.7344	15.7562	15.3036	15.3313	15.484	16.5555	14.6695	16.0886	13.1442	12.7603	12.7051	14.0761	14.9748	13.7195	14.468	13.1021
AGFG1	16.3685	16.4502	16.9175	18.0155	16.4632	17.1047	16.618	16.7024	16.3451	16.5191	16.6687	15.669	16.1233	16.5949	16.5989	15.5693	16.3188	16.872	15.9659	14.9097	15.5486	14.3645	15.5384	15.0923	16.0804	16.4744	16.0487	16.7586	16.7548	16.8586	16.1936	16.1151	16.6085	15.3988	16.0273	16.4422	15.9079	16.1706	15.2948	15.7745	16.0008	16.1897	16.0825	17.3531
AGFG2	13.6005	13.5938	15.6009	16.2812	14.6474	16.4247	15.4942	15.3868	15.4986	16.7244	15.1226	16.3979	14.1081	14.7167	15.3218	16.0498	15.4235	16.8002	14.4999	15.2919	14.6113	12.8933	14.6864	15.1474	14.4221	15.3901	16.1538	15.934	14.3324	14.8392	15.4103	15.3053	14.9822	16.2252	15.2551	14.9808	15.698	14.0209	14.4676	13.1522	15.326	15.6548	15.3414	16.3606
AGGF1	12.8668	13.1201	14.591	14.546	12.2873	11.1935	11.864	12.7699	12.6952	11.8978	12.879	14.4638	14.0253	13.1661	11.0709	11.1652	12.0241	12.7306	11.3649	10.91	10.8287	11.4432	11.4763	12.9824	13.3141	11.4469	11.7523	13.7936	11.8189	11.3529	12.2825	11.794	12.8456	13.681	13.6279	12.804	11.8817	11.7314	10.9892	11.2439	12.6666	13.9185	13.1904	13.0484
AGL	16.4656	17.3286	17.1348	18.1907	16.1527	16.159	17.0388	16.7432	16.4788	16.8301	17.0077	17.7124	17.5595	17.1938	15.363	16.4888	17.094	17.4447	16.4538	17.4482	16.758	17.1784	16.5615	17.1853	16.2768	16.1498	16.4693	17.5732	16.5713	16.7893	16.7019	16.7573	16.573	17.4238	17.1191	17.6287	17.017	16.5928	16.7089	16.7315	17.2422	16.3894	16.862	17.8235
AGMAT	17.8312	18.0594	13.6601	17.1138	17.8648	17.0838	17.299	16.9681	15.6747	16.5308	17.2636	17.5313	14.1151	16.4696	17.749	16.5201	17.1438	18.1622	17.9797	17.5182	17.9075	12.4755	17.3026	12.4763	17.4795	17.9685	18.0935	16.2088	16.9373	17.4697	17.1467	16.5451	15.9445	17.3781	16.5828	12.6426	17.6419	18.103	18.0946	18.3898	16.0396	15.6108	17.8817	16.733
2001-08-01	16.1699	17.27	17.5611	18.7669	16.8186	16.1948	16.8062	16.2696	17.183	16.7176	16.4023	17.0726	17.1789	16.5885	15.4172	16.0506	15.5799	17.3535	17.0287	16.4547	16.0641	17.607	15.9031	16.6991	16.3512	16.4467	16.9017	17.4062	17.0342	16.277	17.5715	17.4983	17.0132	17.7507	17.8431	18.3405	16.1486	16.1818	16.1446	15.9255	16.0187	16.2084	15.4908	20.1942
2002-08-01	15.0665	15.7672	16.4218	16.5063	15.5257	13.4376	14.9025	14.5499	14.9747	14.9587	14.3802	12.7862	15.7183	13.7745	13.8437	14.8202	14.525	16.7469	15.1206	13.6699	14.6091	15.2092	14.7297	14.6314	15.0018	14.6584	14.6398	14.8504	15.2106	15.0447	14.7687	14.6215	14.8709	15.2105	15.3182	15.8576	14.1568	14.0878	13.5858	14.4233	14.2149	13.9454	14.3807	13.0024
2003-08-01	16.7467	14.3266	17.03	16.8185	16.3218	15.035	16.7397	13.2443	16.3808	15.4392	16.1686	14.7226	17.246	16.2538	13.9003	15.7345	15.6226	14.9694	15.7727	14.2925	15.0302	17.0716	14.7877	12.8033	14.7971	14.7448	14.4255	15.306	14.7335	16.3487	15.5801	15.0024	14.6382	15.582	16.1453	16.2584	13.5784	13.9961	13.1106	13.5352	14.9633	14.0932	17.189	13.0808
AGPAT1	13.1962	16.2354	19.5117	13.9386	16.0906	15.8904	15.7678	15.6183	15.8441	16.4389	15.7772	16.6346	19.0812	16.4999	16.5847	16.6502	16.4799	15.9166	16.8036	15.93	15.7517	17.3146	15.9905	16.2797	15.5688	15.7599	15.2394	15.2539	15.4501	15.5724	16.1912	15.9616	14.9293	15.3973	16.5094	17.8004	15.8753	15.6675	15.8385	16.3967	17.1158	16.9628	15.7337	15.7674
AGPAT2	16.8565	13.7444	16.8397	17.3553	16.8402	12.6545	14.8301	14.324	14.8605	13.7122	15.4741	17.3207	18.507	16.5362	15.8122	13.5953	13.7356	17.5705	14.8975	14.283	14.2152	13.3067	15.1149	14.8858	14.275	13.3989	13.7082	13.8735	12.3675	13.0118	14.975	13.2804	15.0035	15.2114	15.0936	12.1807	14.0903	14.4985	14.9183	15.1524	14.4704	13.3633	14.0388	13.5655
AGPAT3	16.6478	15.8755	16.7716	17.1009	16.3275	14.6656	16.0742	15.4742	15.9856	16.187	16.3664	17.3001	16.582	16.2451	15.8013	16.1289	14.745	15.8572	15.6936	14.6981	14.793	15.1418	15.7432	16.5534	15.9052	15.2911	15.7533	15.489	14.5003	14.3591	15.8855	15.7149	14.704	15.6885	14.7933	15.4554	14.7728	14.8892	15.4847	15.007	15.7965	15.6232	16.2438	17.1665
AGPAT4	15.3886	13.3254	17.0797	17.7385	15.658	12.3186	13.195	14.3084	14.192	14.2725	15.1804	14.4347	15.669	14.723	14.7565	15.8997	16.1632	16.4895	15.2783	13.9041	15.2274	15.1264	14.8509	13.327	13.4533	14.4668	14.761	13.1905	12.1353	11.2215	12.8253	11.2358	12.2649	13.1065	13.3995	12.181	14.6541	15.2946	14.9368	14.9225	15.0238	14.4001	15.2929	12.7177
AGPAT5	18.2282	19.0628	16.9871	17.3787	16.7845	16.5313	17.2128	16.165	16.291	17.1474	16.8476	13.7081	16.4003	16.7189	17.5308	15.139	16.1337	17.5462	15.1424	15.2906	15.4382	14.5118	16.4479	16.0892	17.6158	15.8276	15.6196	16.788	14.2419	17.2752	16.4041	16.7121	16.3249	15.9404	15.4119	14.9716	15.815	16.5931	16.2349	15.7571	15.666	16.0713	16.02	14.9215
AGPS	16.7626	16.1265	17.2027	17.6555	16.4494	15.8726	16.5642	15.9616	16.3736	15.9538	15.7598	16.1071	17.3107	15.4514	16.594	16.2077	15.9965	17.0176	15.9281	15.2751	16.0041	15.7022	15.9261	15.9653	15.883	16.2114	16.0342	16.2396	14.67	16.3094	16.1557	15.435	16.0274	15.6462	15.5955	14.4948	15.4617	16.6053	15.9723	15.6892	16.42	17.8719	16.6874	16.3544
AGR2	23.2455	27.085	24.073	22.7251	24.1929	25.7442	25.1706	22.9006	22.9251	25.86	25.4095	26.3649	25.8247	25.9213	23.8542	25.4256	23.6705	23.9789	23.9739	24.8286	23.4249	15.7958	23.3173	24.5399	24.3864	24.7809	24.0037	22.9567	26.8463	24.2755	23.1815	25.9195	23.9096	23.5903	24.3298	24.0246	24.5388	23.413	24.7019	24.5763	22.9791	25.5349	24.0602	23.7927
AGR3	19.7174	21.645	19.2577	17.6495	19.616	21.2149	21.4958	18.7327	19.0538	21.7895	20.8584	22.0904	22.177	22.0498	18.6871	19.0077	18.0636	19.5605	19.4874	21.1736	17.8522	12.862	17.9165	22.1877	18.6608	21.1286	20.1811	20.296	21.5745	20.0132	20.3537	22.235	19.5587	19.4217	19.4056	20.05	19.6677	18.9794	20.3255	20.9108	16.822	19.7434	19.1837	17.9302
AGRN	17.5283	16.9629	19.3565	19.5433	17.1985	17.5489	16.0759	17.241	17.5835	17.6344	17.0691	17.3303	18.7235	17.8513	17.0578	18.4622	18.0749	18.5055	19.9319	17.8684	17.9536	19.5662	17.8954	17.3857	16.5243	16.9609	17.0543	17.6594	17.0357	17.5503	18.355	17.8147	18.2367	17.6496	18.0933	18.1595	16.8534	17.1185	17.5582	17.6508	17.4298	16.8928	15.3356	17.5995
AGT	15.8699	16.5954	17.065	17.8817	15.3532	15.8835	12.4474	15.8329	15.9211	16.2635	17.2823	13.8151	18.23	17.1771	15.8609	15.5401	10.9149	17.0543	16.2421	17.3113	16.4011	16.8922	16.4781	18.5259	16.4541	16.7423	17.0443	19.1412	17.3642	17.4918	16.3689	17.26	16.4897	17.7878	17.6599	18.3223	16.9474	16.1616	16.551	15.3811	10.7497	11.6075	11.9658	13.4407
AGTPBP1	13.4588	13.7102	15.4536	16.167	13.216	15.0751	14.0711	12.7987	13.2433	13.86	11.8305	15.5296	15.7057	13.9927	13.4231	14.2364	11.8566	13.7852	14.4651	13.6948	11.7394	14.9702	12.8279	14.4318	14.6281	14.7341	14.282	15.6627	14.0446	14.1768	12.1698	15.1315	12.7996	15.5935	15.663	15.8323	13.8554	13.023	11.5433	14.2703	13.0445	12.9968	11.8321	13.3576
AGTRAP	13.0772	16.6066	14.2067	13.9133	11.8476	11.193	11.6735	12.3254	11.9865	15.4612	15.1588	14.1466	13.7626	15.3548	15.7499	15.9114	11.9217	13.5599	11.0226	13.4437	14.6331	15.6514	11.6516	11.9151	14.9078	12.6192	12.5099	12.558	15.4447	11.8348	13.4834	11.6129	12.1792	13.7033	13.0522	12.3558	14.6249	15.0916	12.8621	15.3161	14.8038	15.8388	14.6836	17.0204
AHCTF1	15.8161	13.705	15.6926	16.2535	15.8418	14.6267	15.5338	15.6771	16.092	15.2372	15.7379	15.0869	16.188	15.3611	16.0065	14.8751	15.3191	16.9395	15.4715	14.485	15.2158	15.2712	15.3346	14.6794	14.411	14.9044	14.3179	15.8225	14.3461	15.4549	15.4099	15.0668	15.8024	15.3746	14.9277	14.894	15.0125	15.2196	14.6916	14.918	15.7643	15.8425	15.3665	16.2391
AHCY	20.1325	20.1369	20.2066	20.4004	19.9039	19.5304	19.4124	19.7765	18.8527	19.4456	19.4059	19.3743	19.8663	19.5948	19.7123	19.9935	20.178	19.2479	18.7962	19.2565	19.9774	18.5633	19.3313	19.9205	20.8632	19.4962	20.4875	19.9511	20.4026	20.003	19.4504	19.768	19.4759	20.0027	19.4727	19.6046	19.5657	19.744	19.6017	19.5521	20.2982	20.1463	20.6935	21.672
AHCYL1	16.5254	18.0064	18.7086	16.0573	15.3928	16.677	16.9557	17.0041	16.7752	16.0844	16.2241	16.9467	15.7514	16.6147	14.8789	15.9402	15.9058	15.5831	15.5615	16.1123	16.0619	16.1084	16.126	16.374	16.4308	17.1988	16.6538	16.8347	17.3423	16.7262	16.5584	16.7787	15.8429	16.9072	17.0084	17.2425	15.89	15.1524	16.3752	15.5388	15.9866	16.8401	16.1049	17.1729
AHNAK	20.807	21.5596	21.6792	22.5878	21.0525	21.1876	22.189	20.9911	21.969	21.643	20.7137	22.3927	22.5073	21.3086	19.6256	21.1025	20.9151	23.0257	22.0945	21.0978	20.9714	22.3536	20.8234	20.7252	19.7169	21.0092	20.9188	22.3494	20.3474	20.9135	21.7187	21.7151	21.4797	21.9003	21.5583	22.2818	20.5019	20.327	20.7836	20.5678	19.7693	17.3547	18.5614	20.6303
AHR	15.3115	16.213	15.4208	14.6291	14.8109	15.1223	15.3848	14.3779	15.1919	14.3954	14.9203	15.6869	12.6427	15.2442	14.7113	14.8548	15.361	14.5638	14.5839	13.8186	14.7229	15.1135	14.4026	15.3745	14.4395	14.9112	14.3098	13.4567	14.9846	14.9065	14.2369	14.5244	15.3347	13.1084	14.5017	11.9136	13.3259	13.2957	14.485	15.0568	15.5848	17.2377	16.2221	17.055
AHSA1	18.1154	17.0488	18.0913	18.2591	17.481	17.2545	16.9586	17.5951	16.7402	17.0541	17.6248	17.5445	17.4402	17.0059	18.0456	17.6603	17.4388	18.6401	17.6562	17.3348	17.7816	17.0908	17.2807	17.191	17.278	17.5467	17.4669	17.1148	17.6561	17.1832	16.9397	16.8646	17.0635	17.2844	17.4951	17.7226	17.7621	17.8113	17.1003	17.967	17.9346	17.9959	18.0312	17.2111
AHSG	17.8309	18.8645	18.0394	13.5703	16.1977	17.66	16.4592	17.6488	16.4913	17.7688	20.3786	16.8377	19.2399	17.2437	17.5831	15.4027	18.9182	14.7134	17.9423	18.6767	17.9069	17.5825	17.6664	22.5121	20.8756	21.03	19.2414	21.2611	19.5912	23.5241	19.825	20.6009	19.6086	20.7599	20.654	20.9517	17.9582	17.0023	18.9786	16.2018	12.3259	12.3345	14.7358	15.6145
AHSP	14.1309	17.369	16.0021	14.507	14.5002	14.4665	16.5636	15.7533	14.4337	15.777	15.5087	16.3583	16.9345	12.9305	10.9301	15.5362	14.2147	14.3377	11.1582	14.8671	16.0724	13.4899	16.0246	17.4301	16.6114	15.8551	14.0501	17.0151	15.0454	11.9723	14.2006	15.0227	16.1214	17.1086	15.1364	17.6326	16.0392	13.6795	14.8922	15.4714	12.5864	12.4999	11.7567	13.1112
AIDA	15.564	17.2221	18.4285	14.853	16.2238	16.9334	16.8598	16.0641	16.8352	17.3328	16.3854	17.6503	14.1203	16.2026	16.5518	15.7795	15.781	16.093	16.5455	15.7334	15.3857	17.5768	16.1977	16.5847	15.7088	17.3581	17.9085	16.6853	16.8132	16.9886	17.4368	17.0769	17.5211	17.6418	16.648	17.4299	16.1565	15.8933	16.0304	15.7619	15.963	15.7596	15.5255	16.4555
AIFM1	17.814	19.5516	18.7272	20.6234	18.2681	18.1391	19.2003	18.1633	18.7113	19.1552	18.8369	19.2948	18.7941	18.8627	19.2888	18.3699	18.0885	19.2207	18.6818	18.2433	17.9223	17.7464	17.7452	18.0741	18.3888	18.3318	18.3196	18.668	17.1344	17.9199	19.5035	19.3349	18.9485	18.9763	18.3843	18.9168	17.7674	18.5313	18.2925	18.4397	18.7158	18.7603	19.0382	18.0528
AIFM2	13.2306	13.6299	14.4793	14.528	15.2511	12.5309	11.5978	12.454	12.7156	12.9992	14.0115	14.3152	14.1669	12.7833	13.1024	15.4041	14.1502	14.8684	14.8956	12.8709	13.4579	15.2409	15.0308	13.2714	11.6309	12.3332	12.8888	13.2367	11.2531	11.9287	13.9624	13.6834	12.4949	12.6149	12.2272	12.625	13.8488	14.1416	12.919	14.7993	15.4055	14.9996	14.6694	13.2644
AIMP1	18.4393	18.8612	18.6952	19.0332	18.0105	18.9554	18.4465	18.3488	17.8788	18.5766	18.3576	18.1976	17.6548	17.7043	18.08	18.5422	17.764	18.1936	18.1169	17.8207	17.0518	17.3884	16.9867	18.112	18.0176	18.2194	18.2033	18.3613	18.5314	18.4252	18.588	18.5805	18.3	18.5342	18.3703	18.3095	17.8515	17.4091	17.7845	17.4732	19.0205	18.0481	18.7607	20.1306
AIMP2	16.4296	17.4423	17.5792	18.9353	16.7875	16.7769	16.6928	16.9776	16.7656	16.8664	16.4885	18.1545	17.2137	16.2288	17.0216	16.4303	16.6054	16.7657	16.6869	16.565	16.7619	15.8948	16.6984	16.9294	17.3011	16.9999	17.0165	16.7108	17.446	17.4697	16.6166	16.9427	16.842	16.7385	16.8202	17.0889	16.6307	16.1459	16.1779	16.9063	17.0748	16.2407	16.8236	17.601
AIP	17.1032	16.9314	17.3742	17.5452	15.7556	16.9665	17.0577	16.4164	17.3398	16.6051	16.4615	17.0194	16.7258	16.9957	16.0741	16.8743	15.9452	15.7837	16.0924	16.2089	16.6497	16.7229	15.6737	17.7534	17.317	17.1685	16.8249	17.1172	16.8258	17.1426	17.186	16.9942	17.193	16.837	17.2725	17.4266	16.3576	15.9485	16.1675	16.4572	16.052	16.339	16.9255	17.9862
AJUBA	12.0681	14.0185	12.4873	14.0841	13.0477	12.4575	12.4815	11.7524	14.1225	12.9357	12.233	14.1039	14.0925	13.9844	11.0648	11.5931	13.989	15.2589	13.0989	11.6594	12.4522	11.4554	13.2363	12.4891	12.764	11.5601	11.0369	13.863	11.5615	10.9547	12.8676	13.3324	15.6814	12.0145	12.3162	12.4756	6.84788	13.3179	9.89565	12.0022	15.7273	13.3614	11.4708	14.215
AK1	17.1987	16.9452	18.8348	18.889	17.617	18.3768	16.852	16.9371	17.2183	16.7123	17.7536	17.274	18.3831	17.7714	17.8531	16.6774	17.8785	17.6124	17.9514	16.6693	15.9756	17.1416	15.9926	19.8032	17.5381	17.4849	17.3052	18.1198	17.8566	17.8778	18.1708	17.2159	17.1703	18.8232	17.8867	19.0228	17.5558	15.745	15.9403	16.3372	18.6305	18.0943	19.1215	19.4405
AK2	19.8539	20.5509	19.7937	21.3759	19.4697	20.7545	19.7841	19.7256	19.36	20.264	20.7048	20.9817	20.6945	20.3654	19.4285	19.4911	19.309	21.5439	20.4575	19.3301	19.2993	19.9043	20.0311	20.4464	20.2036	20.0816	19.8447	19.7727	19.7928	19.9165	19.7262	19.7958	19.4477	19.2024	19.1935	19.3552	19.1632	19.3051	19.4857	19.4688	19.6754	18.6702	18.8301	20.7895
AK3	19.5744	18.8603	21.0137	21.426	19.1595	19.4195	19.7175	18.4417	19.7671	20.0798	20.5532	20.3608	20.9886	20.5277	18.95	19.391	18.5055	19.8813	19.8722	19.4564	18.9778	19.755	19.6922	19.1305	19.691	19.1112	19.3045	19.2519	19.955	19.7283	20.2397	19.7794	19.3928	19.6488	18.9985	19.3044	18.7971	19.5571	19.2237	19.0962	20.103	18.6947	21.3738	20.2677
AK4	18.5347	19.6863	18.044	18.7308	16.959	16.9787	17.9861	17.769	16.913	17.6365	16.2291	18.4894	18.3459	17.7731	17.8263	17.0677	17.7067	17.6877	18.3702	17.0664	17.1254	16.76	17.79	18.3297	18.9533	16.6514	18.8223	17.4745	16.0262	18.1797	18.4397	17.7798	14.7545	18.0187	17.3598	18.8775	17.061	17.2355	15.7599	16.9414	17.545	14.1983	16.2709	18.3735
AK6	14.7365	12.3145	14.7917	14.4829	14.4669	14.122	13.0761	14.4432	12.6192	12.9102	11.7558	13.9216	13.3078	12.4823	15.4849	11.6441	14.1469	17.6816	12.2233	11.3607	11.5384	12.1496	13.4669	12.2749	13.9408	14.5777	11.9349	13.1564	10.7565	12.6834	12.6495	10.7693	14.2856	11.9653	14.1973	12.9199	11.5446	13.5533	13.2012	10.9166	11.8539	14.7792	14.6628	13.0096
AKAP1	17.1748	17.2498	18.1771	17.8738	17.1524	16.3723	16.8661	15.658	16.5063	16.7017	16.5756	13.9948	17.9314	16.7002	17.1133	15.8001	16.8613	16.8834	15.8644	15.7461	16.5532	12.1491	16.6848	14.4432	16.4558	16.674	16.1928	16.9485	16.1229	16.1752	15.9278	15.7373	16.3561	16.0039	15.2384	16.2688	15.98	16.9721	15.6384	16.7172	16.4057	15.3176	16.2744	18.4885
AKAP10	13.4946	13.6417	14.6469	13.9483	14.4689	14.5463	14.9756	15.1084	15.6619	14.5804	14.4567	13.3198	14.1228	14.1794	14.6079	12.7266	14.2873	13.8211	15.2553	13.6114	13.7061	12.6292	12.6843	12.5751	12.2539	11.2645	12.0571	12.9861	11.884	11.9873	12.7546	13.6975	14.576	15.2209	14.6229	15.3043	12.8821	14.0761	13.2781	13.0792	13.8477	14.0116	13.7601	15.2064
AKAP11	13.8729	13.4868	12.7613	13.7664	11.7906	11.8202	12.578	12.3811	12.2607	12.7352	14.0097	13.3344	14.2189	14.0805	12.9645	11.2099	11.6824	12.6392	11.7322	11.9166	12.5685	12.0239	11.8983	11.5068	12.62	12.9281	11.1746	13.9038	11.4463	11.9562	14.0063	12.8429	14.1599	12.6569	12.8856	11.9687	11.8047	12.2895	12.8872	12.6546	12.905	13.5562	14.4717	12.627
AKAP12	16.9326	16.772	17.8561	18.8619	15.691	16.3999	17.9851	15.5101	16.9364	17.5842	15.1688	17.6024	17.4016	18.0154	13.765	15.8674	16.2282	14.8029	18.3771	17.0962	15.7971	18.4524	16.227	17.1638	14.7091	16.8767	17.16	18.2949	15.999	16.8036	18.1172	17.5095	17.3296	18.4787	18.1541	19.0926	15.0618	15.9724	16.8204	15.5069	12.5259	13.6794	13.6978	12.1182
AKAP17A	16.3397	17.4743	19.2304	17.5069	15.6046	17.8879	16.2591	17.0731	15.1416	15.344	15.2082	14.7577	16.8579	16.1341	16.2437	14.4953	13.901	15.7931	14.6187	13.7259	14.1941	15.702	14.3968	16.005	14.4568	16.6619	15.785	15.9736	15.7216	15.1193	15.5499	14.857	15.215	15.2867	15.7229	18.0367	14.1886	14.6476	14.0968	14.9352	15.2907	15.7823	14.8264	16.2377
AKAP2	16.1885	16.2839	17.5709	17.7941	16.7546	16.3604	16.1947	16.5507	17.0297	16.3861	15.4952	16.0746	17.2513	16.1303	14.6425	16.5623	16.647	16.9552	17.5628	14.9606	16.3058	17.7043	16.2338	16.3052	15.7132	16.0014	15.8774	16.2424	15.5246	16.2697	17.4974	16.0937	17.0244	16.8996	17.1099	17.2262	15.3545	15.6396	15.7256	15.9353	14.4157	13.7189	14.9811	16.2111
AKAP8	16.5844	16.6534	16.7942	17.677	16.6226	16.7343	15.9228	16.1139	15.5377	16.256	15.9173	16.8636	16.5208	15.4721	15.656	15.5216	16.5932	17.1577	16.117	15.5002	16.0754	15.7195	16.4626	16.4948	16.6074	16.1437	16.4143	13.7826	16.6025	16.9725	16.155	16.3222	16.9537	16.0245	16.0838	14.9613	15.3984	15.8448	15.7112	15.0047	16.5969	17.0445	16.6377	17.9884
AKAP8L	15.797	16.5849	17.6249	17.9754	15.9341	14.9611	14.1405	14.7605	15.8806	15.9091	15.4125	14.5582	17.0745	14.8562	15.3802	14.9888	16.2431	16.8954	15.4511	13.01	16.3802	15.8893	15.1268	15.3066	16.0596	14.707	15.1736	16.1289	14.8004	15.7525	15.7302	15.0039	15.3907	15.5962	14.9614	14.8202	16.0279	16.4792	14.9332	16.0214	16.9964	16.1843	16.6985	17.6723
AKR1A1	17.3662	18.2262	17.0599	17.6414	17.0308	18.6245	18.472	17.9626	17.7828	18.5196	18.2172	18.6058	19.0285	17.4004	17.25	17.4749	17.0999	17.1058	17.1824	18.0146	17.0258	17.0047	17.155	18.9253	18.2775	18.4521	18.0129	17.8046	18.3307	18.4445	17.9793	19.314	18.2155	18.2398	18.1055	18.6995	18.2251	17.1504	18.1034	17.2699	17.7796	17.8373	16.8358	17.4631
AKR1B1	18.391	18.8821	19.3901	20.5185	17.8667	19.6342	19.7543	18.8543	19.5162	20.1024	18.5587	19.7686	18.5018	19.3495	17.1863	19.8697	18.1257	19.67	19.3514	19.5659	18.3542	18.1528	18.1133	20.6184	17.9848	19.8691	19.3406	19.1898	17.9012	19.1892	19.5113	20.4049	19.2598	20.1135	19.8231	20.6093	18.9219	17.399	19.084	18.6039	16.6205	19.5217	17.8174	16.9499
AKR1B10	15.6527	18.1706	17.8135	14.4125	17.7024	20.5322	18.8774	17.1865	16.8058	18.1263	18.4201	19.0965	17.4161	17.8015	17.1496	18.4727	18.2535	13.9428	18.6296	18.1179	16.8848	12.1141	17.7869	17.209	16.7886	18.4083	18.3964	19.0619	17.567	17.5304	18.3336	18.9323	17.1085	19.6385	18.5287	17.6985	17.5716	15.8633	19.9257	18.4531	15.4723	15.5729	15.9824	19.0883
AKR1C1	13.3132	15.3615	13.062	15.2292	13.6868	16.7852	16.9303	11.9291	12.4208	15.5051	14.6712	13.9977	14.5097	15.8757	12.559	15.1612	10.8568	12.5613	13.3394	14.8764	11.1696	11.6149	14.9457	16.0288	13.7908	15.1928	13.2425	17.0428	14.3867	14.6153	16.1115	16.9702	14.8084	16.3431	15.5403	17.9572	10.3605	10.4221	14.5509	17.8368	11.4439	12.2689	14.9411	18.2797
AKR1C2	13.0952	14.6231	13.384	14.7264	15.2758	17.3478	15.5807	11.7883	11.2698	15.3295	12.4814	15.3819	13.7852	13.6719	11.3828	12.1912	11.8586	12.5587	15.1778	16.7093	11.8623	12.9922	12.8303	16.7651	13.4051	15.7305	14.9092	16.5472	15.2489	12.3444	15.9827	13.983	14.9949	17.1817	14.3269	12.0424	11.8603	11.4198	14.7367	14.5817	11.5334	11.712	15.6733	16.8278
AKR1C3	17.7123	18.3635	16.6197	18.5316	18.0794	19.9077	18.6104	16.2634	15.7102	19.0115	18.93	18.8562	18.6497	18.843	17.2331	18.099	18.3696	22.1383	17.9808	18.4389	17.6988	15.1145	15.152	18.5998	19.4378	18.7363	18.1798	18.5675	19.1663	18.6602	19.2907	18.6876	17.1655	18.7475	17.923	18.5402	17.6351	17.0411	19.4754	19.6836	18.5445	19.1705	20.0004	21.8305
AKR1D1	13.3282	12.6314	13.8901	14.1071	17.0426	18.6389	11.9622	12.0011	13.7952	18.6268	17.7726	13.9455	13.9975	13.4005	16.1212	18.3588	16.2336	12.2792	11.515	16.6417	10.0341	12.5403	11.9564	13.4455	17.0335	10.6772	11.5113	12.1384	17.3181	17.145	17.6283	17.3621	15.3849	12.6024	16.4941	18.3197	14.0243	15.1608	18.0611	18.7266	19.0135	17.2661	17.6284	19.8665
AKR1E2	13.9912	17.8054	13.6882	15.353	15.6525	17.6147	14.9875	16.3575	13.4393	17.3397	19.9839	13.3332	13.5755	18.0319	12.7688	20.8232	18.7623	12.9684	19.9561	19.9991	17.3229	11.9107	18.7085	16.2356	11.3745	17.9598	15.895	17.0428	17.2143	15.7708	15.7793	17.4028	15.2904	16.5154	16.7267	16.2174	20.1092	19.2727	19.2587	18.724	21.4174	17.2163	16.6843	12.1488
AKR7A2	17.2798	18.761	17.1492	14.0187	17.267	19.1188	18.0578	17.7651	16.3757	19.015	18.5419	18.6708	15.0487	18.7209	16.0499	18.2878	16.4554	19.2341	17.617	19.5344	17.8882	16.8769	16.9485	18.736	18.1612	18.3089	18.5215	18.2151	18.767	17.8662	18.6472	19.3556	17.7732	18.5646	18.5629	19.0982	17.864	18.0056	18.9477	19.173	18.6219	18.895	18.0431	18.138
AKR7A3	17.6214	18.1789	16.5686	17.3122	16.053	18.5067	16.9473	17.282	17.9165	17.8733	17.069	16.9064	16.7292	16.4969	15.9609	16.6887	15.7357	18.2626	18.3133	17.9668	16.6449	11.5656	16.6709	14.2455	17.1874	16.4641	16.9779	15.2868	18.321	16.0992	16.7449	18.0569	16.6225	17.3091	16.6453	16.8019	17.236	16.0877	18.2452	18.659	15.0604	12.8205	16.0589	17.9728
AKT1	16.4838	15.4449	16.989	17.3469	15.8672	15.3325	15.7283	15.0784	15.5286	15.5909	16.0598	16.7498	16.4594	15.6813	15.2552	15.5578	15.2757	16.916	15.2107	14.8434	14.6999	15.9001	15.202	16.357	13.5913	15.4306	15.1186	15.7484	14.0414	15.8416	15.7201	15.2419	15.6799	16.0667	15.3966	15.8975	14.7821	14.7968	14.8604	15.454	16.0045	15.3062	14.2713	15.1062
AKT1S1	12.8878	12.9726	13.6617	14.2975	14.9095	15.7267	12.6738	14.8388	12.2838	12.4265	14.5774	13.9362	13.0682	12.2771	14.5063	12.4018	14.68	13.1189	13.5914	12.7181	14.2309	12.828	14.53	13.8854	13.4943	14.9945	13.6113	15.2014	13.9579	12.8159	13.4026	12.6871	12.909	13.758	11.7944	14.5916	13.3541	14.6518	11.4117	14.6833	13.9316	14.6711	12.9316	13.1548
AKT2	15.8209	15.4792	16.3322	15.815	15.5868	15.2956	15.3376	15.9372	15.55	16.0909	15.4878	16.4913	15.1206	15.4956	16.0594	15.5397	15.6631	16.1917	15.8906	15.3505	14.7747	15.5582	15.6844	16.5326	14.6612	14.8162	14.799	15.7586	15.1761	15.6818	15.4958	14.5415	15.6801	15.2042	15.4616	16.2441	15.6066	15.5769	14.9845	15.0295	16.1874	15.6631	15.1491	16.0104
ALAD	15.9921	17.2769	17.0773	18.8728	15.8941	16.533	16.8467	16.4387	16.6341	16.8612	16.2091	17.3575	17.8745	16.623	15.4329	15.5522	16.1785	16.8377	16.0675	17.9154	16.2359	17.1686	16.3884	17.3668	15.4454	16.8104	16.669	18.0692	15.5762	16.2803	16.937	16.8977	16.499	17.6193	17.1761	17.7574	17.5714	15.8775	16.5262	16.564	17.0832	15.6532	16.2797	14.539
ALAS1	15.7712	16.5082	14.6925	15.882	14.609	14.8492	12.3761	15.4043	12.4898	12.2102	14.3635	13.1283	13.7929	16.0944	14.3614	14.7769	15.5995	16.0828	15.5225	14.1646	14.8594	13.6155	13.8076	14.962	14.6144	14.7506	14.1622	12.0882	13.3299	15.9456	15.6013	13.5739	12.6755	13.8848	15.3067	12.6031	14.4284	14.955	15.1618	14.4678	13.9628	15.9083	15.6408	16.6483
ALB	19.423	22.0243	19.0091	17.8305	18.5045	20.9619	18.848	20.8595	19.7253	21.103	17.0292	18.6299	13.8792	19.0023	19.9824	19.6509	17.9506	19.6698	21.0538	19.5741	20.8347	21.781	21.9026	24.8272	22.5484	22.7877	21.9849	22.6416	23.6047	24.5675	19.832	20.9422	20.7091	23.8346	22.4852	23.1873	21.5618	19.3888	22.3041	19.3716	10.5897	11.9029	11.9926	17.206
ALCAM	15.3029	15.6296	18.1345	14.2038	14.7921	15.1378	16.2962	15.7972	15.7242	15.7047	15.2542	15.7701	15.2564	14.9523	14.2941	13.582	13.4127	15.829	13.9901	14.5838	14.084	14.362	14.9188	17.2953	15.1139	15.2287	14.219	17.0956	15.4662	16.5952	14.7079	15.3115	15.7949	15.0503	13.7466	15.9607	14.4314	13.9225	13.0403	13.2415	16.8988	15.9743	15.168	14.5472
ALDH16A1	17.6666	17.924	18.7848	18.4983	17.3274	17.1165	17.0617	16.8225	17.2805	17.3806	17.5268	19.2021	18.1692	17.9235	17.4868	18.2238	17.4057	17.7833	17.3236	18.0755	17.3049	17.3742	17.7642	18.2598	16.6251	17.3146	17.1122	17.5682	17.2699	17.2117	17.0279	17.527	17.3423	18.1308	18.1081	18.1204	17.822	17.09	17.9008	16.8204	17.7941	16.5108	15.9768	17.4812
ALDH18A1	18.4157	18.9308	18.8814	19.1427	18.3556	19.0497	18.1022	19.0514	18.6003	18.34	18.8283	19.1608	19.3338	18.3079	19.2531	18.5665	17.3212	18.4867	18.7079	17.4694	18.1935	17.7467	17.9816	18.2511	19.4022	19.2893	19.0883	18.4104	17.8211	18.7099	18.3209	18.5641	18.5477	18.1553	17.7148	17.4358	18.3931	18.1501	18.3607	18.4059	18.988	19.9085	19.5842	20.395
ALDH1A1	19.3458	20.1789	21.5632	21.3344	18.511	19.9767	20.9709	18.1213	19.1217	21.1556	19.3643	20.9301	21.9395	21.5312	17.7189	18.9727	19.2997	18.7747	21.0005	20.7043	17.6634	20.4325	19.7698	21.877	18.2904	21.4949	20.0923	21.6072	20.7535	19.0571	20.7063	20.9808	18.6635	21.6163	20.3346	22.3601	19.7981	19.2016	20.7055	19.7086	20.1873	23.6201	22.2777	19.7571
ALDH1A2	15.9307	18.1884	16.125	16.1543	18.2468	15.945	16.5555	11.8883	16.5111	17.3313	13.0615	18.3065	16.9346	12.1398	16.0999	11.9978	16.9512	18.4203	20.1969	18.996	18.5031	17.7625	17.8751	16.742	15.6716	16.9142	16.2955	18.2516	17.427	17.3336	16.9035	15.0655	14.8063	12.6423	15.7471	15.8949	17.85	20.748	10.9271	11.9656	16.4838	15.252	15.7762	12.9144
ALDH1A3	15.5413	16.2314	15.9848	18.6553	15.2817	14.3585	16.4394	12.7981	15.9279	16.712	14.7934	17.2192	17.3225	16.5947	12.1615	14.9547	14.9804	14.7623	16.9799	14.3956	14.304	16.8483	14.1764	15.912	13.4495	15.1227	15.4767	16.428	15.1858	16.9269	16.5621	15.9006	16.6356	14.5498	16.7199	16.5633	15.1327	14.4791	16.0324	15.5721	15.3435	15.4985	12.1729	16.2923
ALDH1B1	18.0145	17.6286	18.3136	19.2799	16.273	17.4277	18.2935	18.1694	18.5089	18.1998	19.3347	18.2414	18.1361	18.7247	18.3002	17.758	18.5542	19.5532	19.9225	18.0245	17.2211	18.8194	17.8769	15.321	18.4396	18.4396	18.177	19.1561	17.7667	18.6774	19.5885	17.7737	17.4676	18.0337	18.8033	18.0084	17.7031	19.7525	17.3347	17.0765	18.9813	16.7888	18.8178	18.0692
ALDH1L1	15.592	18.2771	18.9188	14.954	15.8654	17.5267	16.0043	14.6013	15.4615	16.9355	17.557	18.2594	17.6829	17.2907	16.0727	16.084	14.8065	16.5889	15.9383	16.0584	15.0071	15.8604	14.6717	15.1571	13.9702	15.7455	15.8583	17.2048	15.6472	16.1511	15.6225	16.8711	16.359	15.8068	15.4329	15.9198	15.6838	15.1488	17.3547	17.8372	15.4254	15.7937	16.8917	16.4079
ALDH2	21.1507	22.0921	22.1158	21.3588	22.2011	21.7355	21.8684	21.2804	21.1758	22.0625	22.9316	21.8634	21.4723	21.8479	21.5456	21.9956	21.7902	21.6908	22.2519	21.3241	21.6149	20.5286	21.9207	22.6876	22.6057	21.6154	21.5702	21.9305	21.389	21.7243	21.8799	21.8404	21.5745	21.9334	21.2002	21.8833	21.4464	22.2322	21.9436	22.3154	21.9898	22.11	22.4457	22.3315
ALDH3A1	13.1751	13.7066	13.9383	14.2136	13.5047	13.4674	14.9873	13.2973	12.4429	13.7466	14.5679	12.92	14.0418	13.2808	11.3345	11.3943	12.9711	11.9576	11.164	13.8496	11.3498	12.4583	13.8126	17.7544	12.4557	12.7571	12.1217	14.0362	13.1849	12.3223	13.4646	12.0366	13.4431	13.4692	12.7122	12.742	14.1826	12.8635	13.9754	11.3727	19.8511	20.203	17.24	18.3842
ALDH3A2	16.9065	17.9979	18.5002	19.4385	17.2213	16.3517	17.8341	16.6265	16.8614	17.3147	17.6318	18.4177	17.6803	17.3729	17.0529	15.4068	16.2087	17.5726	16.2996	17.0747	16.2991	16.4988	16.6161	17.8224	17.3876	16.5853	16.3006	17.3773	16.1877	16.4105	17.7038	17.3385	17.1462	17.8623	17.1153	17.9667	16.9042	17.0483	17.0457	17.3715	18.4103	19.9643	18.3587	19.2105
ALDH4A1	17.1582	17.0587	17.8674	18.4049	15.7773	17.1101	16.7131	16.9917	17.1497	16.4263	17.0204	17.3961	16.331	16.2673	16.9054	15.962	15.5952	17.0603	16.8408	15.9257	15.8456	16.5656	17.2251	17.6783	19.2159	16.5483	16.8312	15.8535	15.732	16.9026	17.6656	15.7389	16.6027	17.0605	16.6215	16.5158	15.1196	17.6558	16.1687	16.7913	15.8481	16.6281	16.9773	17.4668
ALDH5A1	17.3785	17.1607	16.1142	17.7678	16.6121	15.8084	17.1431	16.1546	15.8458	17.4228	17.4863	17.9183	17.647	17.6931	16.3472	15.0083	16.1548	16.0566	17.0888	17.3269	16.678	14.3084	16.6612	17.2741	17.6771	17.0653	17.9951	16.6346	17.9739	16.6798	16.716	18.0502	16.1546	16.8399	16.5452	17.1236	16.5155	17.284	16.5236	16.5724	17.1612	17.9809	17.5533	17.0262
ALDH6A1	16.4566	18.7568	19.7683	19.6982	16.749	18.3807	19.2296	16.6502	17.9837	19.2776	18.9291	19.457	20.4309	19.2601	18.1844	17.1161	16.4153	18.8786	18.5165	19.2751	17.2799	17.1472	17.4537	19.881	16.941	18.1245	18.6253	18.5988	18.2513	16.969	18.4335	19.8344	17.1523	19.2759	18.284	19.0943	17.7924	19.5721	18.5355	18.5889	17.5312	18.5454	17.0779	16.9584
ALDH7A1	18.0768	19.2148	18.8502	18.9391	17.944	18.4623	18.9866	18.8049	18.3602	18.9776	19.2436	19.582	19.3064	18.8724	19.6509	17.4122	18.1676	18.9755	18.2402	18.5664	18.769	18.5239	18.7812	18.7822	18.3557	18.3018	18.587	19.1564	18.1241	17.5029	18.5403	19.2203	19.2871	19.3017	18.2415	18.9609	17.8486	19.2702	18.5131	18.7525	20.1068	19.7022	18.2932	18.7494
ALDH9A1	19.1082	20.4941	19.7874	20.3398	19.2054	19.9948	20.6125	19.774	19.7872	20.5982	20.1681	20.6226	19.7313	20.966	20.5384	19.6251	19.4379	17.6348	19.8979	21.1087	19.4683	19.7456	19.3717	21.136	19.5867	19.5955	19.7177	20.2361	21.2844	19.9087	20.2835	20.8214	19.8809	20.6404	20.3118	20.6707	19.8951	20.3809	20.2921	19.7836	20.1597	20.2358	19.7116	20.5506
ALDOB	18.4771	19.0416	19.625	18.5908	16.4869	18.6919	16.5054	17.919	17.112	16.7606	19.3335	14.1544	18.788	18.3926	15.0604	18.3879	18.2076	13.7056	18.1061	18.073	15.6368	16.8572	16.0843	16.35	17.3203	18.7582	17.6098	17.7313	17.5888	16.4189	16.3433	18.8324	16.8287	17.5158	17.1966	15.4979	16.9233	15.8076	19.254	17.1311	17.791	14.2817	14.127	14.1053
ALDOC	18.6186	19.1844	19.0008	19.6613	17.633	18.8636	17.9355	18.7572	17.5639	18.1866	18.293	18.6896	18.6842	17.9351	17.945	17.9489	17.8894	18.4342	17.8031	17.587	17.5	17.2635	18.1981	18.7471	18.6637	19.0019	18.0281	19.369	18.944	19.15	17.7585	17.7976	18.1714	18.6185	18.6147	18.758	17.7747	17.8165	17.342	18.207	17.752	17.7504	18.2013	20.0824
ALG1	15.5786	16.4467	17.4035	16.5109	17.5821	13.6672	14.7352	15.1071	16.1893	15.2539	15.3878	15.9258	17.0217	15.0917	14.5699	15.1118	14.4805	16.2742	13.3738	13.8445	14.7601	15.4103	14.6049	15.5357	14.9182	14.8569	14.5156	13.7376	13.9465	15.5492	14.6836	14.001	14.2953	15.3198	14.1652	11.7226	14.8266	14.3921	14.7517	14.8271	15.2612	15.0158	15.1315	15.9164
ALG11	13.281	17.2281	17.3427	16.1251	16.2123	19.5796	16.9339	15.8586	17.1408	17.6424	17.6966	16.9826	17.276	18.4994	15.4888	16.7758	15.3397	15.0006	15.8498	14.0814	16.0274	15.6517	15.5803	16.9493	15.7187	15.3009	13.6297	16.072	13.4561	17.5501	16.514	16.92	14.7943	13.4684	15.6141	16.6372	16.6699	14.6261	16.3684	13.3994	14.6204	15.8996	15.4585	13.4363
ALG13	15.9999	13.0951	18.8407	17.9461	17.2371	16.1245	15.0856	11.981	14.6428	16.7917	16.3129	17.9347	17.7634	16.5905	15.9709	16.1327	11.7758	12.5501	12.2733	14.7046	15.0614	12.3968	12.1705	15.206	15.3855	15.4593	16.0624	13.4868	15.4133	15.793	16.2211	15.9836	15.4464	14.6157	15.6515	16.2398	14.7012	14.5509	15.4434	15.7933	15.24	16.2316	15.246	15.5657
ALG14	13.2485	12.7369	13.1747	14.0609	12.3986	12.9931	12.8522	12.4801	13.1077	12.4279	11.9459	13.4835	14.4073	12.839	10.9883	11.1649	12.5183	12.541	10.4604	13.7955	13.9539	12.1175	14.0886	12.8919	11.966	9.98113	12.6463	14.4319	12.063	12.5985	13.1151	13.6532	13.2751	15.2443	13.831	12.9506	14.3372	13.735	14.647	13.8967	12.4836	13.0623	13.2089	12.5445
ALG3	14.6923	12.8775	13.8269	13.6622	12.7602	15.5208	14.438	14.6804	15.2663	13.4659	14.0348	12.6608	13.8617	16.4964	15.088	14.3196	14.8602	16.2989	14.3771	13.8012	15.3805	16.0588	15.9523	13.6003	14.9658	18.1095	18.8995	14.4285	13.8183	14.1006	14.8545	15.1333	14.8398	13.0682	14.4284	12.3832	16.5715	13.7393	17.301	15.4773	13.9855	15.7258	16.4195	14.1664
ALG5	16.7692	16.738	17.0075	16.2401	15.8446	16.5901	17.1573	16.3974	17.2173	17.0634	16.7317	17.2797	16.3494	16.9793	16.7805	15.5231	15.7907	15.5872	14.1641	13.7398	16.1947	15.6836	15.6493	16.8339	16.8842	17.8485	17.4113	15.8108	16.4307	16.3164	16.8014	16.5963	16.3847	15.8866	16.3156	15.5192	15.5006	13.9341	16.0914	13.2943	15.3387	16.6348	17.5071	18.0843
ALG6	16.6334	16.6492	16.3182	17.244	14.7878	11.2273	13.2391	13.0841	12.5555	16.6153	16.0219	14.3936	16.3802	15.0451	11.413	16.2065	13.8191	15.4252	14.2269	14.1796	14.0668	14.6796	15.9153	12.8056	11.9558	11.8868	11.7243	12.3008	11.1856	13.1549	12.7034	11.9396	13.2623	13.1963	11.9613	11.3234	14.6191	13.9421	15.5104	14.4543	14.3092	11.5599	14.7228	12.8651
ALG8	17.6323	15.4253	16.353	17.7233	16.8292	11.4416	15.968	11.8735	16.1463	15.0454	17.1882	13.3602	17.8557	16.7097	15.3668	14.9818	15.2297	17.8084	16.0218	12.7679	15.3228	15.362	15.7538	12.5456	13.4623	11.347	13.8599	12.1249	10.924	11.5199	11.4143	11.8337	12.9196	13.3466	12.7002	12.8973	14.101	15.0544	15.0884	14.8703	15.5764	14.0761	14.0539	14.4431
ALG9	14.4773	11.8399	14.5675	15.1712	14.5657	12.1708	13.5977	12.3007	13.5298	14.0042	13.4449	13.8474	15.3779	13.8968	13.6579	13.2892	13.7993	12.9979	12.9284	12.3969	13.3047	13.7609	13.5564	12.172	12.07	12.5093	13.1493	12.743	12.3993	10.7191	14.0671	13.4893	13.7707	14.251	14.1599	14.5548	13.0797	13.2474	12.8883	13.5945	12.6353	12.2801	14.4651	14.7354
ALKBH2	15.207	14.8658	13.8223	15.9251	15.5506	11.5891	12.5	15.4669	13.594	13.3137	14.475	13.6862	14.6927	13.7797	12.972	15.5676	15.3837	13.2138	14.5837	13.7222	14.8826	14.8216	15.0298	13.2866	14.2378	12.0437	13.4074	12.8104	13.6433	13.1192	12.4213	12.4881	13.479	13.7369	14.305	12.0566	14.5124	15.8466	13.9323	13.177	15.8171	14.7633	13.9933	13.7991
ALKBH3	12.855	14.5438	14.1006	14.4134	12.8072	13.1072	12.5326	12.1532	12.0406	12.7082	12.9527	13.5394	13.0339	11.9877	11.9254	10.98	11.9451	12.732	12.2735	9.32822	13.8371	12.2031	12.3932	12.7375	13.1073	11.0004	12.0495	13.4192	12.2001	12.4021	12.7893	11.9412	12.7565	12.9651	13.8081	12.277	12.1885	12.5731	11.6116	13.3244	12.1595	13.5299	12.0914	15.0504
ALKBH4	13.2606	12.8107	16.0956	15.1388	13.9931	16.9426	14.1698	11.3585	12.0905	12.4199	14.7258	13.5073	14.43	13.243	13.6557	14.6432	15.2823	16.7922	14.4671	13.9535	13.8967	12.298	13.9626	13.1191	12.1403	12.2425	11.9915	13.0231	14.7317	13.0423	14.199	12.1903	14.4036	12.5302	13.213	13.2009	13.57	13.386	11.9681	14.2791	14.1943	13.5013	13.8253	14.8477
ALKBH5	13.3164	13.0308	13.6408	14.0227	12.1749	12.1705	13.8264	14.6885	12.735	13.1384	12.9728	14.3054	13.6889	13.0819	13.9239	12.5096	14.7532	15.5892	14.4868	13.3822	11.672	13.6377	13.11	13.6945	13.9385	13.5612	10.3391	13.239	13.6903	13.5665	12.4185	12.9725	13.9012	13.5239	13.2015	12.3023	13.3519	13.8668	13.0346	12.0758	14.7342	14.5542	14.6529	14.8389
ALKBH7	16.2332	14.7334	15.3419	17.206	15.3154	15.3152	12.0883	14.297	11.6903	14.4996	15.3785	15.6769	14.6485	14.4276	13.4628	13.0936	13.6562	12.8693	13.2729	15.308	11.6684	11.2942	13.707	12.7932	14.6452	14.2593	16.0352	12.0549	15.8818	13.3793	15.266	11.3597	14.1189	12.2778	16.0869	19.8529	15.0412	14.4473	13.2983	11.7886	14.2542	14.9605	12.6358	14.0167
ALOX15	17.448	17.5667	16.8866	17.8112	16.7486	17.145	15.9424	17.0817	18.0015	16.99	16.9882	16.9512	14.2527	16.4293	16.3341	16.0197	15.0689	16.3173	16.2105	14.246	15.9312	18.087	16.377	18.1006	15.9312	17.528	16.5805	16.0438	16.5006	17.1488	16.9251	16.3011	17.1508	17.0198	17.2263	16.8574	15.9835	14.8697	15.6855	14.2872	11.6226	13.3163	13.9576	13.7822
ALOX5	16.2486	15.9964	16.5972	18.5187	15.3244	15.1536	15.8377	15.0486	15.289	16.1151	16.4418	16.2554	17.4279	15.6506	15.113	15.4826	14.5603	18.1597	15.224	15.3374	14.8255	16.8206	15.084	17.8697	14.1435	16.3632	14.8425	16.1241	14.5396	16.951	14.9168	15.9532	15.376	15.5642	16.2898	14.3028	15.0521	14.2115	14.9351	15.7417	14.1526	11.1393	11.5418	19.097
ALOX5AP	20.2729	18.2135	20.6538	21.7808	19.3735	16.4372	17.5384	16.5357	13.1355	19.6279	19.3342	19.4653	19.8575	18.2808	16.3903	19.9855	18.6383	20.7944	20.8953	19.186	18.1978	21.0204	19.6086	18.607	12.1634	11.33	11.3636	11.579	13.253	16.5782	18.2746	17.6194	16.5067	17.0286	18.0216	18.0124	18.5037	17.3266	19.0773	17.7679	11.5138	12.2424	10.7299	12.835
ALPL	16.3125	13.4608	17.2507	18.0468	14.7711	11.5024	16.9	15.7234	15.3764	16.5361	12.2668	16.5819	14.9726	13.1735	10.8346	16.5171	14.481	16.8152	14.6824	14.3689	13.953	16.7364	14.2297	17.9625	11.0463	15.2517	15.3598	13.5919	14.5013	15.9861	14.5812	14.2378	16.2299	13.9412	14.2126	13.0931	15.3803	14.0379	15.8763	14.386	13.6069	13.1888	11.2752	12.4013
ALYREF	18.3487	17.4639	17.9104	17.5786	17.9588	16.017	17.0962	18.0692	17.1086	17.533	17.9151	17.6877	17.6449	17.9457	17.2986	17.2374	18.3735	19.0118	17.4397	15.7159	16.7362	15.9295	16.8842	16.7764	17.133	16.8368	16.7467	16.9762	17.9248	16.8051	17.474	16.3827	17.8925	16.8015	16.3	16.8903	17.0526	17.5851	16.3034	16.7163	18.8163	18.7001	17.961	18.5977
AMACR	13.1764	12.595	17.5178	19.0132	15.4301	12.0278	15.4343	15.5995	14.1949	16.1173	14.0825	16.9561	14.0801	14.489	15.6845	13.7571	15.4561	13.0085	11.4173	14.8359	14.884	12.5331	16.6297	14.3594	16.8747	16.1278	18.0541	16.9497	14.3341	17.6135	15.8461	14.6625	15.1492	16.7231	12.0701	12.6572	14.9182	14.745	13.1001	13.9735	16.53	17.861	18.4766	17.3078
AMBRA1	13.7273	12.9427	13.8136	13.9768	14.0685	12.2764	12.072	11.7629	12.818	13.3958	12.3563	12.8782	14.5583	12.9888	12.8938	11.0655	10.4313	12.0701	10.6791	9.3965	10.444	13.0361	10.444	12.8698	12.8597	11.339	12.4902	13.8187	11.6558	12.3612	12.4376	12.3499	12.605	12.6511	12.6129	13.432	10.6719	10.0365	10.327	10.2403	11.6157	11.4259	11.6534	13.4773
AMDHD2	15.4268	14.733	15.6313	14.6235	12.5135	14.8901	12.2639	14.0335	11.7698	15.2873	15.3973	14.2609	16.3306	15.6537	14.6686	15.7981	14.6208	12.7995	15.3049	14.9133	15.7289	14.5251	14.1546	12.3578	15.0681	15.1732	13.457	12.2768	12.8197	12.3838	15.607	14.8008	15.584	14.9393	15.0475	15.6717	14.5139	12.9798	15.4	15.4456	14.4736	15.0378	16.3537	14.9662
AMER1	11.6432	12.3997	13.2339	13.7999	12.391	12.8386	12.9766	11.7362	12.6241	11.8525	11.6433	13.8123	14.4421	11.9625	11.752	10.8146	11.492	12.8812	10.814	12.0227	10.4904	12.5302	11.6207	13.7156	12.4091	11.5058	13.6175	12.9957	12.5799	13.7898	12.7596	12.5929	12.4951	12.9753	13.3726	11.8467	12.4816	11.7481	12.7225	11.7257	11.3793	11.7859	10.3635	12.6527
AMER3	13.2461	13.8044	14.9314	14.4229	17.8785	17.7918	17.9748	12.0846	17.4794	13.6019	17.7202	13.8924	14.2116	12.5222	16.9698	18.2355	18.3435	13.0066	17.8123	17.0324	18.3489	11.9737	17.3621	12.1059	18.6823	12.5835	13.7791	12.8368	18.9464	11.6567	17.684	12.4611	17.9781	18.2742	12.3686	13.4332	17.4035	17.8398	17.7984	17.5372	18.662	18.3368	18.7724	13.2813
AMFR	12.5165	12.5427	15.5066	14.0677	13.0691	12.1393	12.2982	12.7509	12.7287	13.1473	11.7412	13.6076	15.7701	13.6299	13.1473	14.2347	12.0577	16.3497	12.6618	11.4456	11.4683	12.3567	11.3707	12.4808	12.3655	11.8914	11.2616	12.7247	12.125	12.397	13.1357	13.501	12.6254	12.6716	12.6033	12.6024	10.3135	11.4586	11.4297	11.7028	13.0195	14.4297	13.3317	14.254
AMN1	13.3581	12.0095	13.7346	13.7334	13.6956	11.3539	11.7044	12.1272	11.4806	13.2479	11.3288	13.615	13.1046	13.2271	13.3366	11.6058	11.7433	12.6238	11.7295	11.1771	12.2246	10.9493	11.2273	12.7479	13.106	13.6525	11.3903	13.0512	11.9649	12.0904	12.4536	11.9592	11.123	12.3824	13.2797	11.0751	11.2629	11.7369	12.0235	8.69318	11.1809	14.8684	14.5701	14.8833
AMPD2	18.2157	18.5397	17.9453	19.3696	17.3761	17.3287	17.305	17.0643	17.1971	17.6539	17.6661	18.3781	18.0769	18.02	16.6732	17.1469	16.7989	18.3007	17.6478	17.353	16.7959	17.3382	16.8141	17.6455	17.2703	17.3815	17.7781	17.4837	17.7553	17.7069	16.8186	17.4978	16.858	17.064	17.3078	17.2326	16.9326	16.6409	17.1333	16.7629	17.8253	16.5526	18.2487	18.404
AMPD3	16.6003	15.8271	16.9604	17.4156	15.1771	15.5031	16.1503	15.4599	15.4658	15.4203	15.1371	16.7909	16.3896	15.8795	14.242	15.6734	15.4307	16.3459	15.2033	14.8627	14.5796	16.1452	14.8662	16.8563	14.1657	14.957	11.9555	16.6083	15.5512	16.2619	15.4725	15.6469	15.3547	15.6565	15.6232	14.9535	15.226	14.0285	14.8333	14.6915	13.337	13.5845	13.7444	15.3449
AMT	12.346	17.3854	16.7852	13.6436	15.8402	15.8047	17.2055	16.0382	11.8887	17.3869	14.9911	17.3523	18.1317	16.1263	16.5394	14.487	12.2544	16.0787	14.3892	15.6315	14.2909	11.9106	15.1853	13.7777	16.2199	12.8552	11.9688	15.7559	16.3879	13.0476	16.3832	16.9929	12.4973	15.329	15.1509	15.9843	14.4533	10.663	14.9046	13.4369	16.0026	11.7227	11.4749	13.4833
AMY2A	13.7442	12.4909	13.4328	14.5154	13.4905	11.5499	13.4097	13.7826	12.431	15.3436	15.3584	16.0945	14.3474	12.7295	12.3577	10.669	12.6963	13.4021	12.4389	11.8562	11.0293	13.3827	12.1784	16.7159	16.5872	13.1929	13.5322	12.3523	14.2829	18.3489	14.5987	15.3533	11.6247	15.8041	13.9093	15.9664	15.0671	14.2207	16.5494	11.4315	12.0536	10.6458	11.5382	13.6104
AMZ2	12.4349	13.0008	13.8988	14.7142	11.4209	12.0768	12.3755	12.0671	12.4591	12.9548	13.326	14.1191	13.5209	12.2072	12.8256	10.8636	13.0562	13.5652	11.4034	11.9225	11.782	13.2037	14.7931	12.3052	11.7661	10.6593	12.7966	13.8946	11.8912	12.0109	12.6956	11.9004	13.1993	13.2151	12.7481	14.3366	14.281	14.3842	11.7102	12.0986	16.0642	14.2596	13.2368	12.3993
ANAPC1	15.8701	16.1112	17.1015	17.7385	16.5892	16.2005	15.5572	16.1583	15.9197	15.8324	15.966	17.3227	16.5102	17.0654	15.8476	15.4529	16.0777	18.8089	14.8325	15.0085	15.3492	16.4109	15.4186	15.1773	16.1968	16.4151	16.212	16.2609	15.5187	15.5813	15.3805	14.284	15.6954	15.8483	15.7676	15.809	15.5668	16.221	15.1707	14.8313	16.4761	15.7949	16.1969	16.6471
ANAPC10	15.2399	13.369	15.3238	15.0334	15.7107	14.4443	13.6992	14.4502	12.1051	13.1834	15.1757	14.7503	12.4737	15.5194	17.2789	15.0045	13.895	15.5313	13.5019	13.6474	13.5939	12.9549	13.9033	14.8671	14.8084	14.4878	14.6491	12.8912	14.2075	14.6979	14.9055	13.3672	13.544	11.477	15.2778	14.9491	13.8765	15.5376	13.9344	13.9044	15.7121	14.5797	15.2863	12.0593
ANAPC16	15.7104	14.488	17.3859	16.1806	15.5462	14.5562	12.6179	13.9437	12.8759	14.5709	15.2465	13.5935	16.6944	15.0977	14.0155	15.8138	15.5319	17.2911	15.2155	15.5217	14.897	14.9886	15.3016	13.9902	13.9475	12.8212	14.2645	14.1638	14.0504	14.4723	13.6605	12.5447	13.2343	13.9529	13.7503	12.7012	15.3754	16.3569	15.134	14.26	15.9939	15.126	15.1837	16.5895
ANAPC2	12.8246	13.3016	14.4245	15.0254	14.2353	12.3561	13.2829	11.4359	13.0472	12.1603	13.2331	13.6691	13.338	12.6526	12.5964	11.4035	11.9624	13.0633	16.7375	12.9065	6.58629	10.5522	13.1253	11.4704	7.32461	10.2165	12.4031	12.3873	12.1127	12.8286	13.5509	11.7393	12.7392	13.2519	10.6946	13.5113	13.2887	13.9415	12.5829	10.4747	13.6674	12.25	12.8497	13.5142
ANAPC4	16.0583	14.9328	12.6128	15.7407	13.8241	14.0904	12.5099	14.3385	14.6402	14.0653	15.1902	13.7913	13.0965	15.0295	13.4694	14.5607	15.1959	14.4659	14.1375	13.5202	13.3874	14.5919	13.823	12.1994	14.8884	14.2014	14.5076	12.8555	14.2481	12.7146	13.664	12.6932	15.2219	14.2245	14.1246	14.6729	13.1426	14.4542	13.4119	12.3707	14.4119	13.6079	14.8417	16.8125
ANAPC7	15.3372	15.6103	16.2514	17.1098	15.6965	15.5566	16.5618	15.5407	16.5119	15.4984	15.3388	14.4547	16.0933	14.7565	15.5803	15.8892	16.0812	16.3707	15.0194	14.7586	15.2374	15.3423	15.4762	15.1913	15.485	14.6612	15.0363	15.7921	14.7194	15.9206	15.8975	15.366	16.3314	15.6803	15.4905	15.3386	15.5003	16.2559	14.7243	14.7144	15.8516	15.7535	15.8403	15.8764
ANG	12.994	15.4538	14.2114	19.6716	12.3143	16.3103	14.4864	11.9353	13.5397	16.1414	13.9359	15.3944	13.3896	14.2154	14.8506	13.8615	12.955	14.387	15.6727	15.7312	14.7822	14.4747	14.6403	14.8594	13.5133	15.5107	14.6196	14.5797	15.2778	15.2413	15.3177	15.8712	16.2853	16.8395	16.0034	16.5999	14.4263	14.0578	15.1714	13.5228	12.8261	10.9272	11.8756	13.3232
ANGEL2	13.6673	13.6629	15.6237	13.9235	14.7185	13.3455	14.109	13.9848	14.1526	12.2248	13.9817	14.5955	13.9128	13.1024	15.2593	12.1875	12.2668	12.9034	11.7337	12.778	10.0708	13.975	13.0003	12.5398	14.6509	12.9715	13.0489	13.1654	13.0617	11.9217	12.3364	12.7826	14.3686	12.7627	12.9952	12.2023	12.2107	12.7414	11.8693	9.18395	14.0942	13.1556	12.3536	13.3269
ANK1	14.6314	19.2371	14.9152	14.4727	14.8668	14.3703	15.8325	15.8473	15.833	16.4719	16.6371	16.1009	17.2736	15.1848	14.6224	15.3729	15.2758	16.1446	12.2539	17.1234	15.3671	14.8123	14.9253	18.3734	17.2436	16.4035	15.6936	16.8021	15.3174	15.5323	16.2303	15.087	15.7049	16.7276	16.3684	17.9966	16.9529	15.1885	15.4148	15.1902	12.7179	11.6523	12.7072	13.4631
ANK2	15.195	17.5699	17.822	15.6115	15.7107	16.297	17.1042	16.2427	16.5513	16.8997	16.1923	17.2992	16.7617	16.4477	15.8458	14.6133	14.1879	15.4689	15.3547	16.6157	14.5754	15.948	14.8617	16.3599	16.3696	16.2222	15.668	17.1585	10.382	14.8522	16.3799	16.6037	14.8712	17.369	16.6769	18.3456	13.5762	15.288	14.8229	14.9608	16.1431	15.7711	14.5283	17.6967
ANK3	15.2779	18.8913	16.2808	14.4237	16.0393	15.573	16.2915	14.3941	14.8593	16.5195	16.0574	16.9845	18.5382	16.232	15.7004	15.3978	15.2383	14.6016	15.5012	16.0182	14.6703	17.5786	14.7693	16.9094	15.6293	15.5553	15.4847	15.6913	14.6373	15.3703	15.027	15.9746	14.9623	15.8598	15.1869	16.5204	14.7816	15.1507	14.9927	15.1097	15.0612	15.4203	13.9085	16.545
ANKFY1	17.0227	16.9518	17.5792	17.5792	16.3077	16.3968	17.0526	16.3741	16.6131	16.8381	16.7387	16.9123	17.5238	16.7242	16.3851	16.1846	16.0043	17.4029	16.2397	16.9386	16.3213	16.5694	16.4216	17.0375	16.3945	16.5203	16.1791	16.7561	15.9211	16.3806	16.9844	16.7114	16.8418	17.3417	17.2168	17.4981	16.6481	16.2199	16.6392	15.9474	16.6545	16.7197	16.2492	16.889
ANKHD1	12.7153	13.2276	13.6898	14.6082	16.0145	14.5078	15.122	15.4697	15.2974	13.1606	12.9997	13.395	15.0519	11.0885	15.8987	14.1703	12.311	15.3717	12.8346	11.8958	14.6588	14.6692	15.2293	12.1562	12.8573	15.6474	11.787	11.9409	15.0932	12.2892	15.3367	13.9875	14.675	15.0005	14.7076	11.9052	14.5778	14.3088	14.1838	11.5819	13.744	15.4557	15.3	16.6573
ANKIB1	13.5052	13.3523	14.9291	15.8485	13.5148	8.80884	12.6387	12.5951	12.5214	13.2736	12.6208	14.7988	15.9736	13.4463	11.3397	12.7883	12.7143	13.5141	12.9027	12.3151	12.9867	13.9247	12.3834	12.0099	11.7327	12.9416	13.0892	12.7794	11.3048	13.3018	13.7645	12.8664	12.4292	13.2778	13.9408	12.4605	12.2438	12.5017	12.3439	11.8507	12.9976	13.1364	13.174	11.6123
ANKLE2	15.65	14.9892	17.2628	17.3295	15.9019	14.751	14.1718	14.6015	14.3744	14.9371	14.9537	13.4428	18.508	14.6582	15.0553	14.5551	15.1927	16.294	14.4631	12.3854	12.6025	14.3009	14.273	12.2555	14.7986	14.1443	14.0008	13.1259	12.7292	14.1387	14.8893	13.0312	14.8062	12.9012	13.3061	13.0852	13.7369	14.3899	12.7422	14.7753	15.3724	15.3433	15.2205	16.3681
ANKMY2	15.2839	14.6091	16.494	13.9425	14.7031	14.8393	15.6115	15.3152	14.3568	15.0853	14.8001	15.8629	15.4938	14.4809	14.2199	13.293	13.4865	14.3144	13.9153	15.066	13.0984	14.0155	13.2415	15.8014	14.9616	15.7195	15.146	15.3012	14.5442	14.8836	14.9889	14.5683	14.7086	15.6184	14.6563	15.5553	13.8137	13.5472	14.5939	13.9361	14.4035	15.978	14.9819	14.0884
ANKRD10	14.7134	12.8344	16.2495	14.7445	16.503	13.9945	12.7674	14.4635	14.504	14.121	14.7474	14.3934	13.7024	15.1386	12.5419	14.5831	14.629	15.0938	14.1126	13.117	12.958	14.9973	14.0813	13.646	15.4602	13.0379	13.1855	12.5552	12.8761	14.5064	11.8608	13.4692	14.4189	13.0253	14.047	12.7082	13.5135	12.9498	13.9529	13.2815	14.8327	12.7131	13.8195	12.5571
ANKRD13A	15.6268	14.6444	16.3913	17.0078	14.7227	14.3817	15.0512	13.8765	14.3445	14.3829	14.253	16.197	16.2134	14.982	12.8338	15.4352	14.1339	17.0224	14.1449	15.3318	13.777	16.0263	15.7184	13.9985	13.6806	13.5713	13.7415	13.5815	14.399	14.2282	14.7743	14.396	15.2843	15.1573	13.4059	14.7175	15.2185	13.4937	15.2453	13.6084	15.0246	14.0077	13.4752	14.6406
ANKRD16	13.0255	12.4973	14.4219	14.4469	13.7333	12.9918	13.1348	14.6896	13.2929	13.4956	13.4193	13.5261	14.8027	12.9308	12.547	11.8443	12.4236	13.3601	10.6854	11.6365	12.8402	12.6403	12.2785	14.4592	13.5828	15.281	15.4374	13.4885	13.4375	13.087	13.2038	12.005	13.3747	13.68	13.4625	13.2637	12.8494	11.5209	12.6929	12.5939	11.8789	13.6678	14.0864	15.3003
ANKRD17	14.0224	14.5409	17.3055	13.7613	14.8072	14.836	12.5803	15.0826	14.2347	15.481	15.5379	15.3604	17.5719	14.5966	14.2758	14.8785	15.1305	15.9048	14.5622	14.283	14.1785	12.2916	14.5322	15.3064	15.2168	15.5839	15.2166	14.337	13.9869	14.112	11.674	14.0373	14.6285	14.3831	15.2246	12.5568	14.5606	15.216	14.0484	14.7137	15.5275	15.8401	15.4486	16.8973
ANKRD22	16.673	15.7272	15.8545	16.5979	18.9436	16.7934	16.7549	17.6715	16.2836	16.7512	17.7528	16.6492	16.6135	15.8202	17.2524	18.3467	16.7468	16.9882	16.7203	15.6282	17.3914	14.8668	18.2458	16.2681	17.3951	16.9034	16.5543	16.5958	15.7995	16.5444	15.5686	17.0525	17.7257	16.2272	16.3168	14.9403	17.8399	17.0017	17.021	15.8777	17.9708	16.7308	17.4538	13.1591
ANKRD27	14.0949	14.0016	16.4665	13.9141	16.1052	14.4865	14.6006	15.1562	12.0592	14.4221	14.4731	13.7073	16.8114	14.5481	14.2586	13.3711	13.7422	14.9742	13.5392	12.1862	12.9307	13.6376	13.3907	14.4699	14.3259	14.5916	14.7676	14.6665	13.1756	13.7393	11.7933	14.5457	13.315	13.5449	13.2639	13.8074	13.1418	13.1779	12.5868	12.9122	14.1626	12.2171	13.317	14.8049
ANKRD28	16.5986	14.8027	17.9056	16.5595	17.3208	15.556	15.8611	15.0398	14.6155	16.1365	16.6918	13.8168	17.2888	16.2699	15.8959	15.711	17.1508	17.172	16.6872	15.8477	16.0032	16.7067	15.5041	13.2525	14.53	15.4029	15.2438	15.7298	13.9768	15.0001	15.0631	14.3106	15.6783	14.8184	14.1299	12.6858	15.6609	15.8303	15.4604	15.1866	16.3003	15.6095	15.7925	17.8003
ANKRD29	15.4866	18.5235	19.7659	19.9138	12.2351	17.6833	20.186	12.2615	17.1211	16.728	16.7706	19.4551	20.9579	19.5963	12.7028	13.2891	12.8485	12.941	11.8874	18.503	15.9828	12.5749	15.0178	18.5809	14.4639	20.1812	20.6334	20.1535	16.0564	16.5628	12.6384	17.8224	11.8594	18.1364	17.8991	16.3456	11.8116	16.1482	16.741	15.9947	11.1401	10.6535	12.5539	16.2488
ANKRD44	16.1568	15.6077	16.9248	16.4905	15.398	15.191	15.4745	15.1595	16.1371	15.7265	15.7305	15.5638	16.4029	15.9023	14.5975	15.9491	15.2811	16.0101	15.4496	15.648	15.3626	16.6239	15.3931	16.8577	14.5254	15.4793	15.0447	14.9711	14.5784	16.0122	16.2072	15.7406	15.9884	16.6134	16.4891	16.6014	15.3201	14.5649	15.5814	15.3811	11.9276	14.3747	11.5547	14.0288
ANKRD50	13.5413	13.2506	13.9261	14.4296	11.8323	11.8527	12.9375	13.1053	12.2001	13.5816	13.1199	13.4249	13.3388	14.3573	13.2882	11.0802	11.9669	12.7244	12.5972	11.7691	11.0546	13.2609	10.9676	12.5203	11.8636	11.636	10.5729	13.8425	11.7797	12.9789	13.4374	13.3624	12.31	12.7514	12.259	13.6844	11.2117	11.9073	11.514	11.3717	11.2204	12.2125	12.9376	14.1751
ANKS1A	15.264	14.1643	15.6548	14.9483	15.0836	14.1261	13.4307	14.3149	13.3366	13.4468	14.2727	13.6232	14.5827	14.0456	13.862	13.6184	13.8176	13.6104	13.4936	13.0497	13.6756	12.3779	13.1501	14.2772	13.8238	13.8059	13.8747	13.6984	13.971	14.1255	14.2122	13.3032	14.951	15.4114	13.6971	15.3945	14.0502	13.4198	13.5679	13.7867	14.5539	13.4695	14.2031	15.4443
ANKS1B	18.1653	18.9659	17.8077	18.6117	17.6472	17.4829	12.1703	19.172	18.9458	17.8932	18.0455	19.2021	19.8262	17.4257	18.0499	18.4469	18.7457	18.4052	18.2499	17.0675	11.2718	18.7777	19.2112	18.0351	18.8551	18.2361	17.829	17.8569	17.9593	20.0318	17.2984	17.6517	17.9996	17.1538	17.5773	17.4515	18.4941	18.285	12.8988	10.4093	17.826	18.9837	17.3715	19.6537
ANKS4B	12.4942	14.8688	13.3398	13.9333	15.3249	15.8841	15.0225	13.7107	13.8709	15.0181	15.7742	16.5146	16.6402	15.8716	16.592	14.8544	14.4469	16.3156	12.7448	12.3462	13.2854	12.0334	14.2032	13.6825	15.3948	15.6108	15.28	15.4963	15.0121	11.6497	14.3651	15.3588	16.1824	13.9993	13.3927	10.7133	14.5438	13.2935	13.396	14.7885	11.2275	12.6514	14.0983	16.747
ANKZF1	12.955	12.9598	15.7474	14.0368	15.9081	14.5564	13.3385	15.4306	13.4378	11.5601	15.4108	15.2922	18.3984	12.3904	14.2407	15.891	14.8349	17.5169	13.5328	13.8304	14.069	12.3272	14.0883	11.8589	13.047	12.6226	15.0313	13.1373	15.4614	12.7058	12.4822	10.7618	15.1108	16.4349	11.9947	13.1668	13.9255	14.0819	13.735	14.2968	15.5558	15.4229	14.8572	13.3501
ANLN	14.7805	14.2544	15.1821	14.1288	15.6034	13.8887	10.915	14.5469	13.1981	12.5552	12.8407	13.5589	13.8824	12.835	15.802	11.8908	13.548	13.0109	12.7743	10.8098	13.1217	11.7071	13.9658	12.8509	14.1715	14.3481	14.9087	12.4454	14.3992	14.787	12.9478	12.1858	14.2809	12.75	13.5901	12.4415	12.2793	12.848	12.4063	12.6829	13.3065	15.0569	16.1884	15.7971
ANO1	12.9283	15.9641	16.216	15.7091	12.8233	13.4003	13.1864	12.6566	14.7304	14.6409	13.3478	13.3522	15.2138	11.7353	14.4431	11.7022	12.7254	13.4352	14.9368	10.4132	12.3806	13.2412	13.9415	12.6795	13.76	13.722	10.644	12.3802	13.9697	12.0041	13.5057	11.3595	15.0798	12.839	12.0387	12.7266	13.9065	10.9719	11.2915	14.1919	14.1736	15.0841	11.819	14.9489
ANO10	16.4384	16.8403	16.8272	18.0106	16.0171	16.5716	17.4459	16.0782	16.4419	17.2191	16.2761	18.0099	17.1989	16.3392	17.1277	16.0843	15.1578	16.3067	16.1266	14.6042	14.2032	15.7997	15.775	15.6963	15.7249	15.5138	16.3316	17.1944	15.3186	16.0608	16.4402	17.2166	15.7659	15.5238	16.0086	15.5381	15.563	14.4002	15.247	16.241	15.071	15.6296	15.3939	16.7033
ANO6	16.8934	15.8532	17.1304	18.2838	16.7251	16.0832	16.8663	15.5555	16.9115	15.6328	15.8074	16.299	15.7932	15.7923	15.8142	16.0101	15.5408	17.7995	15.976	16.4091	16.4909	17.4812	16.6353	16.6823	16.0078	14.5617	15.3021	17.61	13.9712	16.2263	16.094	15.8226	15.4863	16.7026	15.7616	16.8	15.4815	15.8498	15.1354	16.0129	16.054	15.1655	16.0349	17.4904
ANO9	14.2946	13.9668	15.6456	14.4636	15.7917	15.1749	14.9733	13.2331	12.6974	16.5015	15.5615	16.2962	14.1211	15.7805	15.1836	15.5512	13.3617	13.0252	14.818	15.2926	14.4836	12.581	14.2698	12.943	14.8546	12.7717	12.8565	11.656	12.7926	12.6964	12.0587	12.7215	12.6406	12.4125	12.4328	13.8458	13.5377	15.0767	15.118	15.8868	13.7784	11.4259	14.0805	16.2802
ANP32B	18.1239	17.8506	17.6907	19.7835	17.3566	18.7265	17.9498	18.7922	18.1333	18.2335	19.0259	16.6454	17.9138	17.8758	18.0366	18.9272	19.1651	19.7129	18.4057	18.0273	18.8256	18.4284	18.3392	18.4832	18.411	17.9751	18.0626	17.6914	19.0859	19.1682	18.2718	18.0519	18.3197	18.0156	18.1861	17.8325	18.6508	18.5753	18.1939	17.8343	19.2255	18.9861	19.0076	15.4964
ANP32E	15.9031	16.4204	16.5832	13.79	15.5533	15.5981	15.0569	15.0797	15.2196	15.496	15.9851	17.1387	13.8697	15.17	15.6615	14.6828	14.9799	15.2979	15.1176	14.611	15.1398	15.033	14.7096	16.1002	15.8034	15.1527	13.807	11.8363	16.4511	15.9506	14.871	14.6862	15.3041	15.8192	14.7407	14.6219	14.5927	14.1794	14.3934	14.6092	14.3148	14.3475	15.724	17.4449
ANPEP	16.5109	16.706	18.311	19.2009	17.0328	16.6573	17.4506	15.6002	17.7054	16.6534	16.451	17.3466	17.2981	16.8223	14.7673	15.6807	16.3527	16.6743	14.3995	16.1459	15.7779	18.5662	15.6052	15.9971	14.6145	15.8045	15.4393	16.3945	14.4037	16.1308	16.764	16.3314	16.6552	17.5969	17.3362	16.2047	15.1572	15.3437	18.3303	15.8117	11.0524	12.7926	16.3013	12.279
ANTXR1	14.9258	15.4045	18.8546	17.8561	15.9816	14.2121	16.7256	16.4454	16.7682	13.4399	14.9254	16.6098	14.8057	14.7804	15.4726	14.3466	14.7703	17.1483	15.8565	14.524	14.9891	17.1986	13.5118	14.6779	14.8135	16.3669	14.4219	17.3424	13.5556	13.1955	15.6776	13.1898	15.8781	14.721	15.5057	14.3092	14.2871	14.279	13.6951	13.7236	11.4362	13.1821	12.298	13.0201
ANTXR2	13.5966	14.928	16.751	18.1056	15.9293	15.6725	15.6406	15.0346	15.9337	14.6679	14.1182	15.001	15.6655	14.6561	12.788	13.4958	13.9764	15.4137	15.1788	14.011	13.2022	15.9555	14.2724	14.9963	13.4375	14.2781	14.6156	15.5411	14.1812	14.7025	15.1924	14.3319	14.7026	15.7884	14.9949	16.1403	13.5177	13.4319	14.2295	14.588	15.5563	13.8333	14.1827	14.1859
ANXA10	15.6877	13.9251	15.698	14.6305	12.1456	15.7903	13.0282	13.7921	15.0915	13.0064	15.6801	13.0076	13.5269	12.789	13.6742	12.0424	12.0438	13.6582	19.4876	10.7803	12.0028	11.9169	11.0866	15.7757	15.1678	12.4512	12.8139	12.1154	10.6457	13.1186	12.9358	12.7319	11.9789	12.0777	12.5607	13.9465	10.9162	11.2538	10.4376	17.286	11.1878	13.2593	12.3637	12.909
ANXA13	19.0755	20.6058	19.6353	20.6593	18.0534	20.3142	20.5368	19.9002	19.8455	21.1795	19.5092	21.4609	20.4215	20.0751	19.2729	18.602	19.6154	20.3921	21.1094	20.1904	17.9335	20.2017	19.8357	20.4805	19.3375	19.4422	18.7771	20.3462	18.7446	19.6102	18.8516	20.4869	19.1158	19.4059	18.9818	19.6528	18.8761	18.2699	19.4956	21.3283	19.4977	18.0241	18.7819	20.234
ANXA3	19.3416	19.0483	18.9484	18.8177	19.1155	19.2568	18.943	19.2422	18.845	17.5978	20.02	18.3223	18.8007	18.2401	18.6713	19.3488	19.1583	18.9955	20.1455	18.117	18.9642	18.749	18.5238	19.7284	20.2148	19.7291	18.9887	19.537	18.0075	20.8888	18.6943	18.5233	17.6867	17.7987	18.3845	17.7471	18.7877	18.7575	18.1751	19.0001	20.2667	19.1877	19.9088	18.4821
ANXA4	19.6877	20.1679	19.8055	21.6639	20.3432	21.332	20.2476	20.0054	20.3384	20.4646	20.6699	20.5516	20.8711	20.8574	20.7678	20.7605	21.2353	18.8765	21.217	20.3748	20.4293	20.1073	21.0807	20.6332	20.8492	20.0222	19.9133	20.3802	18.2889	20.5491	21.1332	20.7806	20.3917	20.8802	20.5213	20.4938	21.0084	20.3711	20.9204	21.5845	19.5222	19.6392	20.6829	20.6871
ANXA5	21.8842	20.8642	21.2568	22.6519	20.8159	22.6502	22.0477	21.7385	22.6722	21.4803	21.1516	22.0032	21.7184	21.6759	20.0279	21.4227	20.6895	19.638	21.6212	21.3666	20.7339	21.7135	20.6721	22.0714	20.9991	21.3865	21.2385	21.3386	18.7866	21.3444	21.9418	21.8411	21.9859	22.0303	22.3152	22.3867	20.6826	20.3986	20.8592	20.4544	21.0364	20.3015	18.0338	18.6878
ANXA7	17.7445	17.4499	18.9536	18.3735	18.274	17.8462	18.0893	17.7725	17.9637	18.3037	18.5232	18.5043	18.6468	18.798	17.0521	18.1399	18.4417	17.8979	18.3151	19.0743	18.101	19.195	18.4343	17.6237	16.8149	16.5741	16.5627	17.8202	14.6482	17.2545	18.2235	17.8471	17.4165	18.1521	17.8263	18.5761	18.568	18.1494	18.4362	18.328	19.0948	18.0325	17.732	16.2882
AOC1	16.7856	16.7468	16.6796	17.9686	15.2551	17.0186	17.9241	14.6671	16.2037	19.5574	16.3443	18.7412	18.1138	18.8547	17.2208	17.3786	16.6078	16.674	16.8788	18.5505	16.8623	16.3234	15.5744	15.4659	16.2707	16.5493	17.3096	17.5992	17.4636	18.0847	16.3884	18.6478	15.5141	17.7993	16.8192	17.7695	17.1136	16.5073	18.6704	18.7886	15.4104	10.9165	15.963	17.2356
AP1B1	17.1103	17.9541	17.4387	18.2758	17.3149	17.9996	18.4337	17.9165	18.1145	18.1347	17.7577	18.3949	17.9564	17.9615	17.8499	17.2946	17.0347	18.2077	17.3754	17.6741	17.5445	18.5292	16.8893	18.3404	17.9233	18.2439	17.8349	18.4692	17.7205	18.0014	17.6242	18.4526	17.8189	17.8573	17.8651	17.9128	17.5563	17.5284	17.8461	17.8951	17.7948	17.878	18.1529	17.5623
AP1G1	17.3721	17.9174	18.649	19.1165	17.4098	16.8736	17.8842	17.1804	17.4959	17.8031	17.5828	18.3843	18.6261	17.5786	17.5897	17.8227	18.3376	18.078	17.7953	17.7476	17.9936	18.081	18.1685	18.1059	17.5435	17.679	17.1121	17.9376	18.1566	17.9617	17.2343	18.2417	17.951	17.3512	17.6801	17.785	18.1043	17.5488	17.7732	18.0132	18.0392	18.4165	17.7331	16.7167
AP1G2	16.3233	16.7822	17.9916	16.8804	17.1381	16.4519	16.6658	16.1794	15.3698	16.5732	16.2925	16.8721	16.4646	14.6357	16.6057	16.5808	16.2514	16.4762	14.1669	14.6817	14.5017	14.4783	15.476	16.5621	15.7429	16.0655	16.5534	16.2943	15.5578	15.4191	14.6826	15.2758	15.662	15.5628	15.2779	14.7877	14.8145	15.9969	15.2269	14.0667	16.9777	16.1685	17.507	15.5379
AP1M1	16.378	15.2484	16.4857	16.9925	16.82	11.1581	14.8191	14.658	14.7033	15.5227	16.4348	16.132	16.5779	16.9424	14.9501	17.0718	15.9215	15.1064	16.61	16.6166	16.4518	16.3395	15.9125	15.8374	14.4264	14.0049	14.0881	16.1492	14.6674	14.1136	15.4236	15.353	14.4288	15.3121	16.243	15.7369	16.5846	15.9843	16.4273	16.7237	17.3424	15.7566	16.1393	14.9273
AP1M2	17.735	17.571	18.151	17.8196	18.2979	17.8584	17.3728	17.3275	16.45	17.6637	18.3084	18.2573	18.5619	18.4466	17.8412	18.224	18.1837	19.014	16.8853	17.8668	17.9739	17.7943	17.7066	17.5951	17.8493	17.8316	17.5901	18.0132	18.4062	16.9526	16.7077	18.0174	17.4581	17.7023	16.9504	16.674	18.1658	17.9594	18.0756	18.2069	18.7634	18.0023	18.3239	17.6697
AP1S1	18.4482	17.4165	17.2683	18.2221	17.0589	15.756	16.1597	17.7357	17.6829	17.295	17.8409	13.3262	18.9128	18.0023	16.3045	16.3873	17.455	17.4023	15.7646	16.6683	16.4407	15.7573	17.1226	15.1978	15.6642	16.1133	15.3398	15.2064	17.0642	15.9526	16.2105	16.6213	16.4691	15.3493	15.6393	16.18	16.807	16.4028	16.4878	16.7718	17.2851	16.9664	17.0582	17.8866
AP1S2	12.5114	12.3289	17.4152	16.4482	15.8518	11.4891	13.0738	15.0505	16.1018	15.1091	16.1619	14.0386	17.425	16.309	16.297	15.5909	15.0872	17.7531	15.2399	15.6822	15.3017	18.0325	15.4174	15.1805	13.6069	14.7831	12.8386	12.25	15.2327	11.409	15.4862	16.0528	15.8496	15.206	16.0876	16.5987	15.6337	15.8016	15.8849	15.216	16.8632	14.8964	15.031	13.0933
AP1S3	12.1645	16.6731	16.731	15.2136	16.771	12.9246	13.0587	13.2832	13.0596	12.1925	18.1538	13.0234	13.3143	15.0464	14.9438	13.9821	14.5531	12.7561	14.9328	13.7045	15.353	13.0479	14.4654	17.896	15.1852	11.7129	12.1319	12.2998	15.9684	14.6329	12.5688	13.7739	13.0239	12.4947	14.5164	13.287	15.775	13.278	14.5508	15.1313	16.4664	16.828	14.8197	13.4482
AP2A1	17.9495	18.2644	19.1392	19.2433	18.2255	18.259	18.4946	18.3349	19.1248	18.2354	18.1632	18.3545	18.7515	18.3286	18.6553	18.8034	18.486	17.8645	18.7944	18.2502	18.3836	19.4558	17.8224	18.538	17.9074	18.2	17.9752	18.3487	18.2595	18.5132	18.6374	18.2999	19.2825	18.6449	18.6609	18.6327	18.0919	18.3509	18.1981	18.2526	18.7834	18.0957	17.6382	17.479
AP2A2	18.411	17.7918	18.8102	19.7452	18.139	18.5433	18.8506	18.0761	18.702	18.6804	18.8859	18.3995	18.99	19.1885	18.2095	18.7389	18.2714	18.4602	18.7369	19.1518	18.4124	19.2431	17.8782	18.5983	18.026	18.2441	18.0483	18.4518	18.3978	18.4038	18.5378	18.5854	18.3906	18.7216	18.7818	18.9179	18.4839	18.1687	18.4904	18.6904	18.0662	18.5343	17.8935	18.0807
AP2B1	19.4812	19.5666	20.1582	20.8488	19.3317	19.6083	20.2006	19.8232	20.5891	19.7747	19.7493	20.0855	20.3684	19.9166	19.7527	19.4192	19.4167	20.4339	19.4579	19.5298	19.4921	20.0476	19.236	20.2871	19.65	19.8388	19.4421	20.041	19.7469	20.137	19.5192	19.9396	19.7425	19.4396	19.7575	19.6416	19.3274	19.4215	19.485	19.3545	19.6049	19.402	18.9657	18.7848
AP2M1	18.7476	17.9151	19.8916	20.0951	18.9577	18.7793	19.4225	18.5899	19.7164	19.2091	18.5371	19.0794	19.2468	19.1856	18.4996	18.9127	19.1725	19.0724	19.3593	19.1829	18.8425	19.7492	18.057	19.0706	18.1783	18.5174	18.1416	18.3301	18.3956	18.394	19.0713	19.0941	18.9115	19.1137	19.1048	19.317	18.6655	18.0561	18.4948	18.4953	18.9544	18.7305	18.2253	16.9632
AP2S1	18.2863	17.9159	19.1057	18.3741	18.5897	19.9036	20.3323	19.838	20.4951	19.1708	19.1067	18.8044	18.2949	19.3998	19.5543	19.0214	18.7928	16.669	18.5248	18.8715	18.0317	18.3933	17.9396	19.516	17.3946	19.1277	18.7028	19.9159	15.9502	19.7084	19.1952	19.3498	18.9757	19.2112	19.2593	19.5801	18.4017	18.3378	18.9942	18.6007	18.6094	18.0988	18.8001	16.9329
AP3B1	18.8507	18.8592	18.9458	18.9293	18.6641	19.1999	19.0339	19.1767	19.192	18.7947	18.7604	18.7783	19.1021	18.8482	18.4209	18.4347	18.3416	18.7209	17.9493	18.3001	18.1963	18.0834	17.9942	19.1677	19.2952	19.0778	18.8447	19.0303	19.0153	18.8624	18.9741	19.2325	19.1866	19.1144	19.0564	18.9436	18.4227	18.1547	18.447	17.9243	18.2822	18.732	18.6168	19.0972
AP3D1	17.7778	17.0436	17.5238	18.3183	17.4992	17.0628	16.9815	17.0802	17.4022	16.9846	17.2532	17.5034	18.0522	17.1464	16.507	17.5228	17.8981	17.9907	17.5446	16.8756	17.0953	18.1816	17.5356	17.7255	16.8602	16.9546	16.621	17.4726	16.5532	17.0619	16.7877	17.3649	17.23	17.0696	16.9663	17.0722	17.4407	16.821	17.3749	16.8848	17.0981	17.1462	17.2154	18.1764
AP3M1	15.7418	16.3228	16.8828	16.7948	16.3264	15.5163	16.1404	15.871	15.7358	15.9257	15.4848	16.6055	16.8447	15.6069	15.5563	15.038	15.372	15.7292	14.7754	15.0791	15.3627	15.5625	15.6185	15.9653	16.3513	16.3091	15.8536	16.0425	16.1195	16.1397	16.3034	16.849	16.7871	16.3573	16.7266	16.8606	14.9219	15.2416	15.7029	14.7829	14.8831	16.0318	15.2728	15.8974
AP3M2	16.4727	16.6674	17.5253	17.1838	16.661	16.761	16.7226	16.4316	16.7256	16.2726	15.6954	17.1158	18.4663	16.437	15.6642	16.3385	16.188	17.3073	16.0242	15.496	15.5036	16.5409	15.2327	16.723	16.5249	15.6286	15.4473	16.8333	15.7823	15.7313	16.5425	16.6678	17.0036	16.299	16.8429	16.8072	16.0926	15.885	15.3086	15.5003	16.0627	16.055	16.4817	16.4581
AP3S2	13.8229	13.1592	14.4378	13.8352	15.4377	13.0912	12.9741	11.6845	12.1415	11.5727	13.8412	13.4954	14.1143	13.8785	12.1634	12.2342	12.3258	13.0346	12.0779	10.327	12.0952	11.81	14.381	12.9408	11.7285	12.6748	12.8162	13.4758	11.6638	12.6527	12.8862	12.1165	12.3156	12.9594	12.0057	12.9337	13.9709	13.9158	14.1619	11.773	13.2243	12.4481	12.8014	12.6369
AP4B1	12.1565	11.4584	14.7675	14.5439	14.3106	12.1378	13.9453	13.8253	14.5207	13.0831	13.487	13.84	14.3219	12.3268	13.0911	13.0678	13.4706	14.8721	12.5794	12.4714	12.8657	13.886	13.0782	13.4219	13.3347	12.3529	12.4623	13.0253	11.8833	13.6245	11.9794	12.9666	13.4605	12.1674	12.8959	12.8727	13.2317	13.2908	12.5157	12.7768	14.0004	14.0588	12.6831	12.6912
AP4E1	13.2704	11.9896	13.4174	14.5032	12.9888	13.8055	12.2946	13.8908	12.9211	12.6764	12.9144	13.3715	14.0877	13.2432	13.3659	12.5415	13.8616	13.2227	11.3793	12.4506	13.3817	13.3068	12.4462	13.7852	12.6716	11.6171	11.2111	12.7679	13.1397	12.264	11.7551	13.689	13.9757	12.5476	12.8627	14.4116	13.3437	13.5152	12.8741	11.6882	13.8108	13.4339	13.2342	14.2522
AP4M1	16.9342	12.9838	14.2446	15.0805	12.5474	12.3613	13.0596	1.04175	13.3485	14.7767	17.5599	14.3158	12.8368	12.8118	13.9274	11.0014	11.3497	11.6056	12.0063	10.3788	10.5692	12.398	10.4684	11.5816	12.1303	11.7226	10.98	12.3808	10.6841	12.4036	13.2354	13.0887	11.8901	11.5095	12.0166	12.0647	12.7558	4.41567	9.49094	11.5978	12.8171	13.8812	13.489	13.6103
AP4S1	14.1859	12.9374	15.1074	12.4526	14.1685	14.6424	12.9441	14.2139	14.4236	13.7552	13.1831	13.528	16.0334	14.0985	14.4392	16.2096	14.3878	12.8146	15.2755	14.0996	14.2371	16.3712	13.3751	14.0505	11.3852	14.0517	13.5302	13.7225	11.5367	12.2734	13.8887	14.3374	14.5019	14.5153	14.5321	14.3067	14.0265	14.5021	14.4352	14.6909	15.524	13.8102	13.405	13.2239
AP5B1	12.5831	13.8068	14.3802	14.4794	13.6557	12.7901	13.6206	9.8123	12.1958	12.5605	12.9951	13.7018	13.9141	12.6509	12.9516	11.8955	11.8956	13.6541	11.9265	11.2736	10.7127	12.1415	10.5566	10.8091	10.9251	12.7518	12.5806	14.2089	13.0298	9.65816	12.7094	10.4437	11.9793	12.127	12.2106	12.6606	11.6093	12.6267	12.4331	11.2213	11.1601	11.3527	9.03437	13.2591
AP5Z1	15.8077	15.0592	14.9408	13.09	14.9991	15.0143	15.4556	14.4003	13.8758	14.001	14.7606	14.5747	14.2128	14.2747	14.1176	14.149	14.0611	15.7436	14.2598	12.6888	13.9411	14.1109	14.0264	14.6386	14.3102	13.9539	14.4665	12.5021	13.7685	12.9559	14.9074	11.5381	13.2836	13.3893	14.9063	14.4035	14.2251	14.1559	12.8113	14.1777	14.7284	14.4154	15.1881	14.6096
APAF1	16.1104	16.2036	16.1685	18.8465	15.8911	15.9248	16.1859	15.0968	15.6064	16.2796	15.6025	16.7056	17.7992	16.0866	16.469	15.1174	15.6519	16.4295	14.4172	15.1592	15.0342	15.9846	15.7231	17.3061	15.998	16.1532	15.0173	15.5787	16.3858	16.3443	14.0672	16.1387	15.6586	15.0544	15.4137	15.2271	15.811	14.8976	15.0992	14.485	14.6373	15.3844	14.3292	16.1695
APBB1IP	17.0631	14.5028	16.5647	17.3465	15.3569	14.9428	15.5579	15.1926	15.2004	15.5855	16.0771	17.1234	16.6	16.6501	12.0542	16.4393	15.7594	17.0602	15.8226	15.2978	14.7889	16.7632	15.4404	16.7091	12.0727	15.4724	15.5027	14.9115	15.0206	15.9272	14.4772	14.259	16.3975	14.969	15.2769	14.7694	15.6595	13.4513	15.0685	14.597	12.373	10.2051	14.8993	15.9479
APBB2	12.7117	14.0228	13.2894	13.405	13.137	12.1875	13.5292	15.0122	12.3273	12.8172	13.2347	13.5677	15.2868	13.6348	14.7205	11.7919	14.5778	15.6299	15.5571	12.6547	12.7955	14.0194	13.9932	13.3687	12.108	12.8097	12.3588	13.0002	11.7832	12.5263	13.2446	13.1286	14.7664	13.2672	13.0383	11.7665	12.317	13.8092	12.053	13.2168	15.3	14.054	13.9266	13.961
APCDD1	12.4391	12.9424	14.8851	14.4259	13.6139	12.3785	13.378	11.9787	14.0675	13.4602	12.1291	13.879	14.4537	12.9532	11.2228	12.7184	12.0607	13.7347	12.8577	11.7095	12.9727	13.3117	11.3092	13.3447	13.1833	11.5036	11.4842	13.4223	11.2485	12.7247	16.9809	11.3992	14.6235	12.0585	11.8508	12.6835	10.8312	14.06	13.0813	11.4229	14.2978	11.7707	13.1915	14.7264
APCS	18.096	17.4709	19.6104	20.3841	16.738	12.6118	19.1581	17.7023	17.7261	17.3262	17.6229	18.9497	19.153	18.8775	15.4798	13.9906	15.4321	16.5132	16.7984	18.0585	15.1628	17.7901	16.3904	19.0982	16.0004	15.3396	16.4159	19.5336	16.1393	17.6187	17.7855	17.9048	17.8359	17.8763	18.1342	20.1484	15.6718	15.4361	15.9006	15.8983	11.9891	15.2935	18.9991	13.2479
APEX1	18.1776	17.4783	18.7351	19.2219	17.5616	17.4629	17.9889	17.9426	17.9208	17.6888	18.375	18.0219	17.3183	17.9151	17.3714	17.8143	18.0099	19.2761	17.9507	17.6256	17.8058	18.163	17.6982	18.1008	17.4856	17.7194	18.0767	17.6017	18.2376	17.5803	17.73	17.8309	18.0502	17.8486	17.6736	17.8606	17.7554	18.3477	17.2117	17.7716	18.6906	17.4478	17.6758	18.3389
API5	19.6136	19.5725	19.8853	20.8248	19.5323	19.3898	19.5059	19.498	19.5124	19.0254	19.8007	18.935	19.8765	19.2726	19.8515	18.6659	19.2927	20.6421	18.8067	18.6936	18.9747	18.8046	19.1406	19.2007	20.1099	19.6924	19.5259	19.3402	19.8079	19.4211	18.9435	19.0565	19.4285	18.9598	19.2657	18.9032	18.6246	19.1946	18.4511	18.435	19.8261	20.0331	19.3083	20.8343
APIP	17.1019	16.3982	18.5993	18.4054	16.6018	17.2101	16.595	15.849	16.5799	15.9429	15.548	16.659	17.7196	16.6865	15.7316	14.8622	15.5808	17.0101	15.7355	14.8451	16.4729	16.2843	15.6761	17.4164	15.7499	17.2437	16.0361	16.4797	16.4477	17.2497	16.5508	16.8885	16.1904	16.9326	16.845	17.131	16.3617	14.9141	15.0391	16.8277	15.2686	15.8802	16.3232	18.1306
APLF	13.5763	13.5645	14.2775	14.981	12.2617	12.6505	12.6467	12.0801	11.9664	11.9903	11.6181	14.0918	14.4244	12.5414	12.2819	10.9199	11.7084	13.4402	11.0001	10.171	10.7154	12.4777	11.5278	13.4533	12.09	12.2824	10.8272	12.0618	10.5528	12.3298	11.2819	12.969	12.3152	13.2328	12.3879	12.7279	10.6314	10.702	10.839	10.9836	12.8515	11.9648	12.3615	12.8783
APLP2	16.4931	13.1841	15.7369	14.9186	14.05	14.9389	14.7504	14.4134	15.3339	14.9572	14.4516	15.7284	14.9853	13.3075	14.0079	15.1236	14.4693	16.0768	13.8619	13.8844	15.5918	14.4545	14.7642	15.2199	13.5327	14.0665	14.5934	14.5376	10.9593	15.8799	14.084	14.1594	14.465	14.7969	14.4476	13.8628	13.8418	14.3394	13.9999	15.2832	15.2912	14.6156	15.5917	16.3739
APMAP	19.0082	19.1415	19.5535	22.0225	19.653	18.3632	20.0421	19.1083	19.852	19.6417	19.5827	18.8123	20.2597	19.6109	19.1308	19.5418	19.6919	19.1564	19.1078	19.1323	18.9018	20.502	20.3439	18.1743	16.5017	17.3243	18.4692	19.3074	16.4978	19.1604	19.1682	18.7779	18.7399	19.3256	18.683	18.8111	18.8805	19.8635	19.8261	19.8019	20.2613	19.4953	20.83	18.6292
APOA1	19.4355	18.1041	18.9632	20.5112	18.1156	19.2024	18.1206	19.0218	18.1502	18.4224	17.723	18.168	21.8791	19.1855	18.5026	18.0599	19.1789	19.7075	19.5163	20.1054	19.9321	20.8913	19.8879	23.1914	20.583	21.0285	21.6835	22.7599	21.4285	22.4389	19.8077	20.6965	19.6004	21.926	20.9744	21.8516	20.2645	18.4388	20.2932	18.3018	23.1345	11.6189	14.1258	15.2118
APOA2	18.9734	19.2928	17.6788	20.2591	19.155	18.2459	17.5959	18.81	17.5767	18.7301	17.0734	17.4797	21.8694	18.6937	17.572	17.1357	17.7802	17.7899	18.17	18.9928	18.4322	19.6674	19.1778	22.1337	19.7911	20.7748	19.2653	22.1085	19.4892	21.6061	19.1367	20.0696	18.611	21.097	20.1095	21.1949	18.5768	16.9161	19.1926	18.0974	20.3173	18.3646	18.2637	12.9987
APOA4	15.1867	16.1685	16.1253	17.7761	14.5734	15.7012	15.0184	15.6924	14.6757	15.842	14.649	16.5083	17.4039	16.4018	15.4377	13.656	14.2418	16.3315	14.4927	15.543	15.4734	16.4105	17.0131	17.8914	15.0149	17.0125	17.6097	19.0627	17.0026	20.0144	16.3846	17.0645	17.2181	18.8328	16.4265	17.2994	15.6357	15.2434	16.8715	12.7758	10.8207	11.4078	13.1911	17.8983
APOB	16.2796	16.968	17.6145	17.7589	15.5967	16.0511	15.267	16.3798	15.7791	17.4738	15.3681	18.2183	18.2189	17.0472	15.9283	15.4241	15.807	17.8712	15.812	17.0069	16.0347	18.3332	16.3568	18.4065	16.0416	16.9874	17.0853	17.9051	16.5435	17.778	16.6826	16.3426	15.8403	17.532	16.5628	17.3013	17.2808	17.0163	16.5415	15.5569	16.379	14.3488	14.6	17.0308
APOBEC3B	14.4508	13.594	14.6126	17.4068	12.9293	10.9394	12.9488	12.4104	11.6614	13.5401	13.1558	14.3057	13.4669	11.7573	11.7827	14.3081	12.9844	14.8741	11.7404	12.6565	12.1112	13.613	11.9301	12.2679	12.3439	12.3502	12.5666	13.6381	11.7733	12.4482	12.7169	12.6091	12.3779	13.539	12.0519	13.2418	13.1402	12.8043	13.0772	11.1547	14.8926	13.0185	13.7814	13.9837
APOBEC3C	13.8803	14.4559	13.8762	15.0985	14.3627	14.4906	12.4927	13.5527	15.8333	15.3259	15.4481	13.9779	14.309	14.0693	14.3924	14.6566	13.5769	15.9938	14.4025	12.8918	14.6715	15.0525	14.4091	13.6389	12.9696	11.2615	12.3953	13.2618	11.4461	12.6363	11.8082	13.5273	14.9358	14.8417	14.5417	11.4809	14.5214	13.1551	14.2588	13.5989	16.7749	14.3523	13.8778	11.8129
APOBEC3F	13.4734	15.6122	15.9393	16.0543	15.3567	12.0743	12.1149	14.4876	16.7134	15.75	15.6928	14.2743	13.6163	14.3091	14.6514	15.6402	14.0981	16.3634	14.3407	13.6737	13.226	15.2825	14.6371	14.5597	11.4989	12.943	11.7197	12.2585	12.0858	12.676	14.2706	14.472	12.6668	16.8754	14.0668	15.8155	13.8244	14.2336	14.5549	12.4545	16.8346	13.6503	14.1531	12.6616
APOC1	17.1049	16.3322	15.6851	17.9607	16.5412	16.7443	17.5218	18.6734	17.5473	16.477	16.069	12.9254	19.1501	16.7096	18.2925	15.6814	16.2739	18.378	15.2245	17.0412	15.4252	17.3534	16.3181	20.4439	18.8853	18.2557	18.9031	20.2608	18.0905	21.1681	17.0438	18.035	16.7245	17.8325	17.9855	19.57	17.025	18.011	17.0046	14.2198	12.1664	10.09	12.3601	14.2665
APOC3	16.7101	19.1167	17.6346	18.8768	17.4825	17.6114	16.1343	18.16	17.1147	18.156	17.6737	18.8903	18.856	16.6808	17.2159	14.8611	15.1467	12.6634	15.4589	17.7532	15.2866	17.4456	15.6244	22.7479	18.3608	18.4864	18.2997	19.5517	17.6869	20.0763	18.2163	17.494	17.2721	18.3637	16.7484	18.6497	16.2205	17.6025	17.0255	14.8587	12.4199	10.8011	18.5235	12.8946
APOC4-APOC2	16.0788	17.2394	16.8271	14.5568	16.9682	16.4797	16.3106	16.9163	15.5241	17.6238	15.3678	19.2192	17.3143	15.0706	17.0892	15.4248	14.9589	17.198	12.206	17.16	15.1325	17.1876	14.8127	20.093	17.1086	16.905	16.1599	19.759	15.0864	18.5361	16.7645	15.9068	16.6095	16.4456	15.3528	17.3424	15.651	17.3776	15.7233	14.8813	11.3644	11.7075	11.8666	13.292
APOD	19.1673	18.2751	19.2335	19.5825	17.7779	16.3175	17.3668	16.6896	16.1785	18.2858	16.6821	17.7731	20.7464	18.3398	18.8666	16.8886	15.9045	18.9675	16.2322	17.8067	17.6571	18.0398	17.1788	19.0765	17.7413	17.8755	18.1883	18.7148	17.3095	19.4176	17.3666	17.8545	16.7169	19.1905	17.3406	18.1538	17.3343	16.1149	18.1994	16.402	13.2119	11.3876	14.5945	12.4313
APOH	15.8701	17.341	17.835	16.1295	16.0751	16.163	16.4118	16.1348	15.7768	17.869	15.857	17.5362	17.756	16.6458	17.9642	16.3024	16.8484	17.4906	17.8083	18.6573	17.054	17.824	17.1435	19.4053	17.1505	16.8525	17.2077	18.3197	16.5663	19.6167	18.0353	18.5792	18.27	17.9086	18.116	19.1641	17.7225	16.6242	18.2899	16.4336	12.013	14.5812	12.3887	13.6968
APOL1	13.0299	15.1562	15.5669	15.4171	14.0587	14.8637	13.0679	15.2262	12.3282	14.3705	12.6251	13.5303	16.6021	13.5908	15.3497	12.4317	12.139	13.2151	13.3337	15.6234	13.8719	13.0204	12.7275	17.8609	14.6441	15.5372	15.9767	16.9375	15.8558	16.8789	15.7215	15.8369	15.0127	15.928	15.7337	17.2355	15.0358	14.1956	15.1051	14.1754	12.7495	11.4554	13.1637	12.9387
APOL2	16.6076	16.2695	16.6459	16.1368	16.081	15.2654	15.0529	16.4867	16.5813	15.5959	15.9999	15.4673	17.2056	15.8237	15.4997	16.9976	15.6414	16.5806	15.8298	15.1235	14.0847	16.93	15.0931	16.6597	15.4825	15.4959	15.8689	14.5228	15.3967	16.3389	15.4466	14.347	14.4601	15.5665	15.0369	15.8736	16.0349	14.6692	14.9985	14.8318	14.0759	14.1371	13.4716	17.0619
APOL3	13.9845	15.1248	13.8118	14.6794	13.8916	11.9268	11.5227	12.9068	13.3483	14.7591	14.5096	13.7436	13.7558	13.745	13.3105	16.7079	15.0143	15.6414	15.839	13.0047	15.2663	15.8572	17.5655	13.9318	12.9425	11.91	13.0981	16.3508	13.3369	12.6101	13.7484	12.4156	13.9465	15.1396	13.5449	14.1586	14.5399	13.547	12.3687	13.7738	13.0094	12.1044	11.6799	12.618
APOM	12.3011	13.0083	16.4821	16.7424	13.8352	16.7933	15.4368	15.7764	14.7118	16.6393	17.2256	17.8643	18.183	16.2093	16.3845	14.9959	15.597	16.3622	15.0084	16.611	15.7188	17.6486	16.2795	19.5128	16.9443	17.3338	17.3682	19.0618	16.7371	19.26	16.7975	17.4308	16.8577	18.2771	17.0784	18.6142	15.691	14.6733	16.3956	15.3619	12.1198	12.1702	13.7342	12.1679
APOO	17.0912	17.455	18.5487	19.826	16.7702	14.8827	12.792	14.1184	4.98007	15.7043	18.0228	16.8866	18.7286	17.6934	13.6174	15.3016	14.9598	18.1861	15.848	15.505	16.1709	16.5103	16.7137	13.1623	14.5712	14.9614	15.4805	13.2076	11.1108	13.2313	16	15.7017	14.9615	15.9069	15.4711	17.5092	15.8908	15.3765	16.3464	15.6791	14.3342	16.2103	15.5844	16.3503
APOOL	16.8756	17.6395	17.2853	17.9676	17.3234	16.8558	18.5377	17.0409	18.0563	18.3134	17.6577	17.8181	18.4678	18.5826	16.9709	16.1015	15.7818	17.8057	17.8814	17.3033	16.8491	17.6456	17.6125	16.7067	16.1138	16.6685	17.3316	17.0434	14.8812	15.5757	18.2474	17.9053	17.7022	17.6335	16.9429	18.2403	16.6239	17.2792	17.6082	17.8867	16.304	17.1697	17.7314	16.5683
APP	16.8537	16.2532	17.9153	16.9562	16.5869	14.0362	15.1753	15.099	15.0458	15.2813	16.0481	16.4213	17.782	15.581	15.458	14.3862	14.8269	17.0941	15.0909	15.1233	15.8205	16.244	16.3696	14.6134	15.1258	15.6848	15.1126	15.4939	15.7466	15.5155	15.3483	15.2922	16.7071	16.7351	16.0087	16.064	14.9684	15.6971	14.6745	14.4761	15.954	16.4576	16.0956	15.1689
APPL1	17.063	15.79	17.9386	17.7101	16.2561	16.4926	16.6438	15.7599	15.6933	16.4978	17.5164	16.9614	17.0715	17.1672	16.4126	15.8914	15.4779	15.44	16.5525	17.1236	15.7486	17.5197	16.8715	16.7335	15.1045	16.1347	16.0357	16.8462	16.8013	16.7399	16.3818	16.8967	16.1	17.0301	16.9757	17.4153	16.4856	15.8672	16.4167	16.033	17.3789	16.4376	14.7095	16.6665
APRT	19.0902	18.6669	18.5357	19.4931	18.0697	17.905	18.5983	17.7815	17.813	18.3563	18.3698	18.6229	18.2098	18.2948	17.2312	17.2505	17.5738	17.9496	17.377	17.491	17.5337	16.8703	16.9824	18.2104	18.1659	16.8705	17.4775	16.944	17.9015	18.4891	17.4332	17.6599	17.0584	17.1299	17.382	16.882	17.3563	17.2861	17.2815	18.0603	18.1604	17.305	18.4815	19.1069
APTX	13.2554	14.5268	14.6762	13.8268	15.2883	14.72	15.0876	15.0685	15.3199	15.2172	14.0595	14.0219	15.3258	14.3973	16.2939	13.6944	12.8694	13.0332	12.954	14.183	12.4632	12.8756	12.7832	13.2846	16.0099	12.5101	12.7184	11.8214	15.5089	12.5628	11.9541	14.0934	15.2934	13.1516	11.7508	11.3711	14.0102	13.5704	12.3194	11.5432	14.0197	14.8989	15.6821	16.289
AQR	16.8303	16.51	17.1744	18.1478	17.0464	16.0298	15.8189	16.1904	16.0664	15.7953	16.4926	17.0794	16.8105	15.9824	15.9368	15.4254	16.0263	17.2073	15.9356	15.5851	16.2141	16.8039	16.3688	16.0539	16.0505	15.4919	15.8305	14.7657	15.9014	16.4062	15.4978	15.3421	16.3422	16.222	15.9716	16.3016	15.849	16.6596	15.5016	15.499	15.7007	17.2113	15.9908	16.7187
ARAF	16.0068	16.0084	16.1337	17.325	16.1167	16.7924	16.6996	15.351	15.9753	16.1777	15.5502	17.3748	17.6984	16.0256	16.4715	14.8892	15.3006	17.9766	14.5153	15.3375	15.7276	16.161	14.7798	16.5625	16.0491	15.8111	17.0204	16.6656	15.1159	15.7825	16.0284	16.6008	15.8883	15.8726	15.7362	15.7069	15.7009	15.6868	16.4953	16.1644	16.0776	15.2938	15.2817	16.7156
ARAP1	15.7037	15.4611	16.2095	17.0817	15.11	14.5901	15.0301	15.1766	15.7842	14.1595	15.0577	17.031	16.0665	15.5275	13.5765	14.7399	14.3047	16.3515	15.1675	14.8576	14.5482	15.7874	14.7483	15.8491	13.8618	14.815	14.2483	15.1884	13.7548	15.862	15.3465	14.5034	15.2788	15.196	15.6459	15.1521	15.1371	14.299	14.3601	14.8788	13.7139	14.0719	15.3062	14.9485
ARCN1	19.0461	19.4149	19.4055	19.3127	18.8772	19.2068	18.7668	18.3938	18.6227	19.587	19.1838	19.9546	19.9838	19.6154	18.6817	18.6163	18.2009	18.0018	17.9983	18.8026	18.4053	18.52	17.8586	19.1237	18.688	19.0148	18.8824	18.5522	19.3224	19.142	18.588	19.7658	18.984	18.5854	18.8203	18.3693	18.8053	18.579	18.7822	18.7628	18.035	18.5996	18.6375	19.1182
ARF1	20.1087	20.2819	20.4121	19.1716	19.9701	18.7643	19.8183	18.8636	19.4669	19.6138	21.0953	19.7842	20.3013	21.2413	19.2988	19.1988	20.5368	19.314	20.1479	19.8905	19.3822	19.847	19.1897	20.2016	19.479	19.5231	19.7459	19.1764	20.293	19.5526	17.5309	19.1184	18.4411	18.3408	18.761	18.4908	19.333	19.5109	20.0156	19.8018	19.3263	18.1122	19.2814	21.0002
ARF4	20.0283	18.6752	23.0425	18.5373	20.9684	17.5909	18.1782	17.9873	18.0798	18.3185	20.5126	19.4877	23.0246	21.0315	17.9694	20.493	19.6563	18.2046	19.5449	18.46	19.5282	20.3133	19.3007	18.4767	18.054	18.0134	18.1185	17.9245	18.2003	17.3368	16.6011	18.003	16.273	17.1021	17.1511	16.6172	19.1797	18.4278	19.3149	19.3627	19.6006	16.5107	17.3319	19.1479
ARF5	17.1256	15.3672	18.9461	17.7927	17.5979	15.5533	14.3934	14.9184	16.3523	15.8372	17.2846	16.8152	19.0286	17.5149	15.1432	17.8865	17.7125	17.9797	17.25	17.1178	17.1482	17.429	17.4168	15.6841	14.9969	15.0995	14.9777	15.3849	15.6787	15.998	14.7672	15.8124	16.0871	16.6454	15.8001	15.8491	15.4832	16.8739	17.3558	17.403	18.1969	15.1026	16.92	18.2081
ARF6	18.9861	18.5368	19.225	19.0349	19.4449	17.7582	18.9594	17.5028	17.4067	18.5413	19.3702	20.1591	19.671	19.89	17.9213	17.3461	17.1302	17.689	17.1493	17.6853	18.7808	18.1013	17.5126	18.2644	17.7186	17.7685	17.6882	18.3692	18.1894	18.549	17.7075	18.5837	17.7705	17.0518	17.9073	17.7114	17.4673	17.7523	17.489	18.6187	17.3383	16.6658	17.1151	18.6025
ARFGAP1	16.6554	17.1339	16.9738	18.1016	16.8654	15.9748	16.2053	15.9605	16.5688	16.1202	15.9438	17.7555	17.1146	15.6377	16.5103	16.2143	16.4675	16.9495	16.1171	14.8731	16.3301	16.476	16.216	16.0044	16.1844	15.9593	16.4715	14.8919	16.1584	15.1504	15.9354	15.9292	15.7449	15.6579	15.9689	15.2118	16.4414	15.4136	15.4307	15.4875	15.6937	15.3755	15.7424	17.0589
ARFGAP2	17.0732	16.7486	16.9818	18.1624	17.116	16.8993	16.8697	16.5444	15.7711	16.6441	17.3378	16.5806	17.9365	17.2359	17.0197	17.0352	17	17.7062	16.8991	15.5958	16.7864	15.8472	16.6584	16.2727	16.5251	16.2666	15.8929	16.5324	16.4734	16.4757	16.3327	16.3353	16.7907	16.2474	16.22	16.1637	16.697	16.5516	16.3936	16.8872	17.3447	16.6689	16.9801	17.1844
ARFGEF1	17.0835	16.3308	17.4625	17.7746	16.9228	17.1338	17.2372	16.9871	16.9582	17.1389	16.9749	17.6728	17.8884	17.276	17.3546	16.5948	17.1647	17.297	15.943	16.6124	16.8372	16.2386	17.0699	17.1996	17.4756	16.8873	17.3165	17.1254	16.2342	17.4261	16.1981	17.2441	16.3188	17.0762	16.8805	16.7897	16.9544	16.4495	17.0183	16.5304	17.0439	15.9772	17.1261	17.5738
ARFGEF2	15.6863	14.4867	14.8979	16.43	15.2122	14.5385	14.5559	14.9686	14.9164	14.7956	15.6758	16.1498	15.3578	15.525	15.2815	14.6494	15.2324	15.216	13.8737	14.754	14.4387	13.8041	14.1963	16.3074	14.7779	14.1141	14.4717	14.0592	15.0671	14.9674	13.3077	14.998	14.1524	15.0311	14.6834	14.3278	15.4759	13.9701	14.5623	14.0398	14.2371	13.6209	14.6891	15.7905
ARFGEF3	14.8022	15.9574	15.6056	16.7109	13.3893	13.6249	14.5325	13.2722	11.4683	15.5128	15.1729	15.909	16.2348	15.7017	14.4477	14.1814	14.5184	15.7965	12.481	13.696	13.0306	12.5157	14.0819	15.175	14.2441	15.2429	15.0528	12.5306	14.0371	15.7538	11.3274	15.3128	14.0188	12.3908	14.6054	14.4254	13.8097	13.3527	13.5731	14.3678	14.3331	14.4626	14.2417	15.0771
ARFIP2	15.8119	16.3011	16.8211	14.0805	15.6188	15.7536	16.5204	16.6621	16.5318	17.0632	16.0315	17.1252	16.5578	15.6929	15.2759	15.444	14.7632	15.4986	14.4402	14.8613	14.2509	12.6244	15.642	12.2392	16.11	15.4491	14.6096	16.0716	15.8322	16.0094	15.148	16.142	15.9218	15.0693	15.7846	16.0682	15.0777	14.0042	14.1075	13.4585	15.8704	16.3978	16.6901	17.0747
ARFRP1	14.9508	15.8648	13.226	15.9431	14.5537	15.1726	14.0911	14.4282	14.9376	16.2152	13.911	15.7531	13.6691	11.8414	15.4333	14.3447	13.5728	14.2717	14.7938	14.1476	14.2882	12.5833	14.6043	16.2509	16.1071	14.751	14.6136	12.5595	15.2265	12.9685	14.7951	15.1723	14.4651	14.3851	13.0203	13.0057	14.6027	14.4154	14.0727	14.3133	14.1869	15.0601	15.4391	15.8888
ARG1	16.3655	15.8495	15.267	15.7433	14.0562	13.8507	13.151	14.8381	13.8972	14.6854	14.5402	14.9654	15.6692	14.4141	14.343	14.0549	13.9931	13.055	13.4519	13.8601	12.4198	12.9367	13.6403	16.7244	12.8375	15.204	14.9684	13.7214	12.8791	15.9363	13.5846	13.8947	13.849	14.0719	15.091	14.3508	13.4212	12.6295	13.8416	11.551	12.0604	12.9593	10.7938	13.5298
ARG2	12.1409	10.5451	14.4347	13.7743	12.4096	13.2744	13.973	13.6345	12.4951	12.7521	13.3761	14.3213	15.0577	13.5449	11.3264	12.1839	10.9781	17.2715	13.224	11.2054	10.777	13.1868	14.4023	14.7853	11.9934	12.763	12.4143	14.0965	10.9127	15.8087	12.201	12.4569	12.863	13.5813	12.6114	12.6537	12.3893	13.115	12.8677	12.1122	13.0666	15.2973	14.0999	15.6138
ARGLU1	18.767	16.4928	18.9477	19.2784	18.6438	18.4306	17.553	17.615	18.1113	17.6421	18.3323	17.9466	18.163	17.9687	18.1014	18.1721	18.0954	19.3702	17.5933	17.2588	18.0812	18.2771	18.17	18.0005	18.5507	18.0107	18.0575	18.407	18.6661	18.1673	17.2988	17.1305	17.4839	17.54	17.401	17.3434	17.2273	18.2568	17.2694	16.9147	18.2378	17.5397	17.4683	19.0408
ARHGAP1	19.0845	18.749	19.2416	20.3759	19.1342	18.2937	18.1318	18.2733	18.53	18.3338	19.4097	19.1941	19.2747	19.5608	19.1267	18.2481	18.2567	19.2052	19.2055	18.8433	18.3979	19.7906	18.3945	18.9262	18.5538	18.2879	18.1537	19.0314	18.7362	19.0396	18.8391	18.9131	18.2461	18.3074	18.9457	19.2905	18.4375	18.5809	18.2766	18.7641	18.3182	17.3166	17.7532	17.9752
ARHGAP10	14.6878	14.7341	14.3148	15.7306	13.6887	14.4009	13.8035	14.6117	13.7775	14.2495	13.9618	14.6206	14.7273	13.6969	14.3974	13.3284	13.3765	13.8343	14.838	14.0482	11.3461	14.6978	14.2611	14.4624	14.6247	14.0526	14.1595	14.4258	13.0583	13.9617	15.3687	14.7009	15.3592	15.5842	15.0752	15.9368	13.6106	13.4199	13.5897	13.6424	13.9827	14.2071	13.8812	13.7969
ARHGAP12	14.8707	15.0967	14.947	17.8992	14.8963	15.6602	14.9752	15.1402	13.5889	14.902	15.1494	14.406	16.2642	15.2434	14.9846	14.2253	14.8965	14.2191	14.9786	14.1567	13.1837	14.0126	13.6799	13.7645	14.5068	14.6953	14.5931	13.6045	14.7001	13.6967	15.3566	15.5557	15.5785	14.9156	14.7016	15.0391	14.572	14.218	14.3087	15.1181	16.2648	15.2785	15.6811	16.0066
ARHGAP18	16.7385	16.0464	16.1273	17.9413	15.8792	15.8651	16.9977	15.9895	16.4018	15.7023	16.876	16.0435	16.7759	16.2602	15.9124	16.2269	16.8185	16.6877	16.6606	15.393	15.3237	16.4061	17.076	17.2513	16.3669	15.9048	15.6725	16.3079	15.9189	15.744	15.9906	15.7589	16.7493	16.0539	15.7375	15.5518	15.7866	15.4257	15.9063	15.9	16.1429	15.4953	16.466	17.6618
ARHGAP21	14.6912	13.5397	14.7745	15.455	14.3933	14.5927	13.7623	13.5392	12.2931	14.1944	13.5595	14.3051	14.624	12.7598	14.2932	12.7809	13.0764	15.0409	13.0522	12.5602	13.4499	12.306	13.0784	12.6599	13.8701	13.8577	13.4497	12.8286	12.8934	13.9734	14.5269	12.2189	14.2855	13.9352	14.0917	12.7485	13.2471	13.4118	13.5506	13.98	14.1696	12.8435	13.3574	14.8612
ARHGAP26	15.6956	17.2508	14.908	13.8682	16.9763	16.0968	16.2872	15.2838	14.6527	16.2524	16.1667	16.5197	17.0283	16.1689	15.976	14.869	14.8402	16.2155	14.251	15.5029	15.1039	15.8572	15.5069	15.6479	16.0235	16.2217	15.2773	12.1222	15.75	15.9033	15.4863	16.0685	14.5898	15.4978	15.6356	15.3651	15.8027	15.409	15.6188	14.8221	14.7097	14.3842	15.1704	16.1252
ARHGAP27	16.4589	15.7368	16.4416	14.4396	15.3252	15.1369	16.9976	15.9269	12.1696	16.5183	16.0844	13.505	15.8415	16.7319	15.7438	15.8228	15.6063	13.3467	13.2462	14.9864	13.6178	14.092	14.7969	12.1663	15.8429	11.1279	15.3697	13.2317	15.5505	12.0752	11.2513	15.4857	15.9104	15.458	12.9111	12.426	14.952	15.4469	14.9325	15.578	15.9518	14.0244	15.231	16.7524
ARHGAP30	16.1692	14.0662	14.9957	16.0293	15.7536	10.6022	14.1128	14.5778	14.9739	15.526	14.3971	14.0336	17.4856	14.0941	12.0796	15.1996	14.3294	15.4275	13.5877	13.836	13.1034	14.897	13.6985	15.3579	12.4924	13.9438	12.1855	13.1734	13.4389	13.2091	14.8647	13.207	15.1148	12.8649	13.4187	13.8823	14.5198	13.128	14.1141	13.5055	11.2064	12.066	12.0329	12.2191
ARHGAP31	13.5538	13.6403	13.8186	15.1345	13.7167	11.5146	13.4502	13.7551	14.7324	14.2074	12.9568	13.9781	13.3847	13.9055	11.6501	13.9195	12.9655	13.7001	13.7026	12.8901	12.9445	15.5914	13.5762	13.8875	11.9915	13.6592	12.7111	12.6637	12.9486	13.144	14.8707	13.7777	12.3232	13.3749	13.8503	14.1595	13.0696	12.3263	13.1337	12.433	12.166	12.661	11.4332	12.8269
ARHGAP32	16.1189	15.9681	16.8505	17.1131	15.8726	15.3603	15.3627	15.508	15.3962	15.5063	15.5116	13.705	17.0081	15.0772	13.9046	15.404	15.418	17.1438	15.2725	14.9623	15.6491	16.8354	15.994	16.421	14.7162	15.6811	15.6536	14.8716	14.7731	16.4662	14.32	15.0463	15.311	15.2086	15.5737	14.6115	15.6128	15.1147	15.2576	15.7937	15.1321	14.8337	15.6364	17.1639
ARHGAP35	16.2434	16.8389	17.2772	17.2788	16.1133	16.7535	15.8161	15.5125	15.4867	15.8708	15.7203	15.5902	16.1874	16.0243	15.8268	15.3059	15.5966	17.3818	15.3151	16.0213	14.4348	16.7963	14.9987	16.6742	15.8471	15.8205	14.8595	14.814	15.5583	17.3372	15.7747	16.7603	16.3476	17.5741	16.4705	17.1681	15.4925	15.4515	15.4454	15.1088	16.0656	16.3876	14.2155	17.079
ARHGAP39	12.1092	14.0284	14.3824	14.7234	11.5463	11.3416	13.0312	12.118	11.4653	12.5159	12.1414	13.6407	13.8622	12.0729	12.5947	12.8529	11.984	13.8635	11.629	11.5729	11.0732	12.4247	12.1978	12.0806	11.4476	13.0858	11.7756	13.6246	11.1292	14.0454	12.2161	11.6237	12.4205	12.6042	13.0336	11.5076	11.7273	12.1254	11.4679	11.5426	12.1366	13.0821	13.3775	14.2514
ARHGAP4	15.6337	13.8494	15.6395	16.1656	14.9423	14.6334	13.8825	14.5454	13.425	14.3037	14.5065	14.0908	15.0013	14.3807	13.9748	14.8722	14.7477	15.1495	14.7527	13.8233	13.4654	14.4843	13.8082	14.7732	12.8131	13.478	13.5927	13.8045	13.5681	14.2073	13.94	14.0641	13.8239	14.6492	14.5632	14.4883	15.3334	13.0756	14.2588	14.8666	14.41	12.5349	13.2353	15.0446
ARHGAP45	15.0086	15.3367	15.4692	16.7569	14.8961	14.9721	14.883	15.1836	15.683	15.5419	14.9446	17.4861	14.8169	14.7624	14.4973	15.6383	14.7323	15.8255	14.7814	13.604	14.2441	15.1479	14.6563	16.3525	14.2353	14.863	14.6773	14.3102	14.419	15.1555	15.1617	14.7725	14.9144	15.089	15.2121	15.3238	14.7364	12.6969	14.5226	14.422	12.2523	11.7349	13.3235	14.5997
ARHGAP5	14.4335	15.4845	13.6574	14.6745	15.0208	14.6844	15.4835	14.8992	15.154	15.1545	14.5676	15.242	15.743	14.3402	15.1254	12.1515	13.3098	16.2509	14.2953	14.058	13.5322	13.7381	12.4186	16.0522	15.0253	14.7016	14.5905	15.5428	15.0079	15.0533	14.5696	14.735	15.0574	14.7004	14.3895	15.3573	12.8775	14.0074	13.4108	14.5591	14.5377	14.7088	14.5008	14.657
ARHGDIA	18.7905	18.2533	20.617	19.5811	18.243	18.3393	18.6214	17.7179	18.2778	18.1444	17.6528	17.4366	21.1519	18.5949	17.1804	19.2907	18.1154	19.1486	18.5234	18.2708	18.1487	19.1149	17.8942	19.0712	17.9892	17.9689	17.7545	18.7985	18.1727	18.5767	18.4755	18.8506	18.5369	19.2064	18.823	19.0456	18.3279	17.9393	18.4639	18.145	18.8495	17.678	17.549	19.0468
ARHGDIB	19.3527	18.549	18.9717	19.9343	19.1415	19.192	18.6888	18.7754	19.5585	18.7732	17.8973	18.8596	19.759	18.4382	17.8469	18.984	18.6892	19.0667	18.332	18.1904	18.4661	19.4081	18.3144	20.5546	17.4464	18.5894	18.3623	18.8583	18.9071	19.959	18.9756	18.9612	18.3549	18.6706	19.214	18.9129	18.9001	17.4258	18.6649	18.1105	15.488	19.2935	14.4292	13.6544
ARHGEF1	17.3612	17.1329	17.9396	18.3701	17.1398	16.6891	16.9294	16.9789	17.162	16.8307	17.0315	17.8336	18.2104	17.1188	17.5881	17.2356	17.2883	17.5629	16.7081	16.7159	16.8374	17.1727	16.6593	16.9929	16.9048	15.8124	16.3717	16.3109	16.7974	17.1404	16.7461	16.8459	17.1527	17.1467	17.2126	17.1234	17.0011	17.1793	16.5971	17.1837	16.6363	16.9397	16.1907	17.3875
ARHGEF10	16.2931	13.7673	15.3385	15.8859	14.5309	14.2445	16.4998	14.5978	15.6317	14.0688	11.7602	13.714	12.9138	15.0831	15.3649	13.5339	14.5877	14.8905	14.2756	13.7808	13.4799	15.7527	13.1844	14.367	13.2103	14.7144	13.9271	14.3258	13.3477	14.187	15.2234	14.1482	15.3032	15.9778	14.9236	14.6856	13.3131	13.9149	13.0815	12.7735	14.5945	14.7989	13.2237	13.4998
ARHGEF11	20.9437	21.3068	22.7647	22.5419	21.7681	20.6027	20.5203	20.7678	20.5722	20.7527	21.1551	22.4849	22.1326	21.0968	21.3759	20.8872	20.3636	17.108	20.4993	20.5676	20.0622	20.4424	20.2123	21.3628	20.2502	21.0259	21.111	21.6702	21.0534	21.3442	20.9187	20.5532	20.9619	20.6734	21.0475	21.1587	20.6867	20.5202	21.1435	20.844	20.8236	20.1759	20.4872	20.6003
ARHGEF12	15.079	15.4361	15.824	16.4621	14.6857	14.5795	15.5587	14.3653	15.6312	15.2456	14.6293	14.8837	15.2543	14.9663	14.7592	14.6905	14.2588	15.767	14.8456	14.7407	14.7539	15.0372	14.6621	15.2701	14.7251	14.3997	14.8293	14.8373	14.0334	15.4485	14.9426	15.0408	14.9592	15.3152	14.5997	15.281	13.9603	14.5131	14.5253	15.3887	14.522	14.951	15.0691	15.4568
ARHGEF16	16.992	17.0367	17.011	17.564	15.7242	17.0141	17.1938	16.7657	15.1231	17.0769	16.8983	18.2148	17.7999	17.297	16.1827	16.0513	16.343	16.2022	15.9038	15.8612	15.8384	13.0879	15.8778	16.1201	17.0367	16.8468	17.0232	16.2185	16.7953	16.0607	16.5072	17.012	16.4394	16.457	15.8592	16.1012	15.5898	15.5724	16.2758	16.4626	15.5211	16.3555	16.6152	17.3604
ARHGEF17	14.8139	14.912	16.7247	17.508	15.5918	12.6052	15.714	14.6767	16.8625	16.3138	14.9272	14.4345	16.5446	15.1623	13.4035	15.6544	15.3037	16.5088	16.3981	14.7221	14.7211	16.5758	14.6337	14.3946	13.9669	14.9381	15.6061	15.6412	14.1261	14.3081	15.5334	14.026	15.6338	16.1911	15.9375	15.9954	14.3136	14.0964	14.381	13.3658	11.3313	14.6165	11.9399	13.3993
ARHGEF18	14.4769	13.4236	15.5105	15.4315	14.7471	14.9178	14.9947	14.4758	14.5018	13.1692	13.5489	14.0568	15.1155	13.9952	12.7247	14.6477	13.9795	15.266	13.8736	13.55	14.1267	14.2166	14.2312	14.2889	11.6961	13.4732	12.3012	12.5487	13.4889	14.3767	16.5227	15.6797	14.4201	13.8625	14.7542	12.0485	13.6707	13.3224	13.8111	14.0401	14.0355	14.3304	14.1326	14.6157
ARHGEF2	16.7157	16.9414	18.7433	18.0763	17.2393	16.2861	16.4361	16.6338	17.1601	16.4743	16.6267	17.7687	18.3743	16.5769	17.0626	17.4884	16.7584	18.2424	16.5333	16.3123	16.2465	17.6683	16.4467	17.0245	16.2012	16.1457	15.876	16.1887	16.5688	16.3528	16.1106	15.3636	16.7213	15.9524	16.3689	16.0877	16.4164	16.3751	16.1265	16.7881	16.5908	16.0137	15.5935	17.6977
ARHGEF37	13.3074	13.2239	13.929	14.4397	12.9395	11.4101	14.2258	11.2184	11.127	14.3919	14.0072	15.5998	13.4374	13.3609	11.8508	12.3231	11.7975	12.6951	13.2378	11.9921	8.19417	12.6274	11.1139	13.0139	12.0524	13.6574	13.9944	14.4341	12.6961	11.0935	14.4156	14.0112	12.5331	14.7639	13.4618	15.1316	11.5895	11.0305	12.8281	10.7104	11.0944	11.8006	12.0449	16.8467
ARHGEF7	15.6599	15.9184	16.2196	17.1133	16.1445	16.1204	16.1273	16.0903	16.5201	16.3391	16.005	17.1292	16.2696	16.3038	16.8699	15.1617	15.7658	15.6711	15.6375	15.4794	15.6074	15.3905	14.5046	15.9724	16.4538	16.3293	15.9948	15.7357	16.0692	16.372	16.6066	16.1527	16.821	16.1185	16.3177	16.2243	14.9011	15.4696	15.5761	16.0435	15.6656	15.3749	15.787	17.2672
ARHGEF9	13.8002	13.7481	13.4917	13.719	13.3572	11.9221	12.9375	11.8511	13.0025	13.2618	12.5657	14.0082	12.5887	13.1008	12.0804	13.5168	12.8572	12.7394	12.9042	14.4174	11.0656	12.8799	14.1058	13.5722	12.8105	11.3738	11.0783	13.4006	14.1348	13.5037	12.761	13.0581	12.6096	13.493	13.7862	11.676	12.1733	11.6985	13.4472	13.9135	14.0675	13.8145	12.7062	13.6252
ARID1B	15.0591	14.6613	15.5807	16.1568	14.1662	14.2147	14.8267	14.7162	14.2575	14.6508	14.2062	13.1856	15.4946	14.7832	14.5984	13.1047	14.3737	16.2423	14.5402	13.1249	14.0531	14.3875	14.4282	14.5448	14.1787	13.833	14.2716	14.3603	14.5512	14.8467	14.9147	13.9479	14.9815	14.5189	14.287	14.0792	14.1403	14.2583	12.8779	14.4522	14.7068	14.2638	14.0977	15.2702
ARID2	16.1719	16.661	16.5103	17.351	15.8572	15.1815	16.5313	15.5329	16.2133	16.0761	15.6377	18.4236	16.4805	15.6906	15.5007	14.9182	14.8807	16.9453	14.9144	14.4658	14.5856	15.139	15.2607	14.2565	15.1994	15.3432	15.8445	15.1864	15.3823	15.2075	14.1905	14.4899	15.0767	14.9476	14.5336	14.3691	14.4516	15.5124	14.996	14.7664	15.8246	15.3737	14.9774	15.9728
ARID3A	15.6991	12.3221	16.7979	16.5883	15.8096	11.8435	13.499	13.2215	13.9949	13.4333	14.7981	14.0204	16.0928	13.1049	13.6862	14.1419	13.684	15.2067	13.031	10.9437	15.1203	11.6847	15.6735	12.4058	14.6516	13.9307	14.7247	13.2882	12.656	14.9911	13.5356	12.638	11.4362	14.0774	12.5477	13.5238	12.72	14.0159	12.4681	10.6553	11.3487	11.8754	10.5779	15.3701
ARID4A	13.8535	13.1831	13.5275	13.8716	12.389	13.3732	15.0287	11.9038	12.4716	12.6369	12.4666	13.5674	13.8294	13.0709	13.7441	14.145	12.5815	13.8179	12.0412	12.3788	11.6242	11.9973	13.9563	12.964	11.6505	11.4703	13.4493	12.5174	10.7832	12.513	13.0627	12.5954	13.4968	13.1284	13.1933	13.3986	12.8978	12.7241	10.3161	12.1385	14.09	13.2629	11.9732	12.9502
ARID4B	14.4634	13.8789	16.1006	15.6313	14.1226	14.3595	14.1921	14.437	14.789	13.1798	14.2688	13.9534	15.1088	12.7299	14.4673	13.4455	13.5469	14.9397	12.227	13.5877	12.4817	14.3688	13.8291	14.0424	15.2544	15.3739	15.1096	12.7912	15.3926	14.1344	14.9894	11.7676	15.3128	12.6951	14.8244	13.8621	13.1047	14.7931	13.9207	12.3532	14.2587	14.125	12.9881	15.3044
ARIH1	15.9797	15.714	17.6083	16.4977	14.5929	15.1789	15.8951	15.2614	16.5081	16.6801	15.7987	16.4005	14.0657	15.0299	15.5406	15.6927	16.1048	16.486	16.0294	15.0145	15.5089	16.4289	16.0512	15.8899	15.4245	16.0333	15.1606	14.5733	15.068	15.6262	15.3244	14.9608	15.1819	15.7842	15.5486	16.7213	15.1708	15.1601	15.5524	15.0763	17.1987	15.6293	13.9064	16.2378
ARIH2	15.497	14.3902	15.9027	13.3175	14.3696	14.9564	14.2719	14.8294	13.7541	14.0435	14.8358	14.1457	15.3392	14.7738	15.6437	14.2145	14.6571	16.8847	14.3183	13.3978	13.6276	14.8365	15.2395	15.0877	14.8916	14.98	14.0141	12.9688	14.3881	15.3377	12.7496	11.9531	14.7225	14.8148	14.4469	15.7358	14.4021	14.2193	13.6228	14.01	14.4568	14.4695	12.9089	15.3086
ARL1	17.8539	17.5459	19.919	19.3113	17.6524	16.7125	17.1483	17.5193	18.2115	17.8852	18.3053	17.327	20.5431	17.7423	17.5487	15.9994	16.1448	17.9026	15.5974	16.4371	16.1618	16.7027	14.7644	17.6323	18.1158	16.1539	15.759	15.8301	17.157	17.6395	15.7351	16.1055	16.4082	17.0052	16.3302	16.4642	16.8136	16.0554	16.9057	16.0892	16.7803	16.7321	16.523	18.354
ARL2	17.9116	16.9328	19.1216	18.6149	17.9762	17.4029	16.9615	17.4673	11.8576	16.3816	17.2583	18.3573	17.6984	17.2741	16.4352	16.3302	16.0632	17.5955	16.3371	15.3721	16.422	16.5833	15.7409	16.5198	16.9606	16.431	16.6926	16.7852	15.4286	16.9044	16.9208	16.7025	17.9607	17.4722	16.8148	16.0138	15.5029	16.5811	14.6597	15.3449	16.701	16.6499	17.1426	17.3284
ARL3	16.3221	16.5655	17.3129	18.5856	16.1235	17.7786	16.5735	17.1689	17.3431	17.2865	16.6996	17.862	16.9853	16.3838	17.5147	15.864	16.1141	17.8826	16.881	16.1025	16.3774	17.3065	16.3113	17.8099	17.118	17.6779	17.4437	17.3443	17.4506	17.6627	16.3638	16.6264	17.1297	17.1575	16.3135	17.3935	16.6415	16.1722	16.125	16.4109	17.7225	17.2947	15.918	18.879
ARL5B	15.7636	12.9869	16.2403	14.8357	15.3196	12.4767	12.6878	14.3891	13.0332	13.0034	15.8672	14.9781	16.1315	15.9392	16.5682	11.0533	12.8178	14.125	11.6447	10.8284	15.6882	15.2771	14.9792	13.3774	16.0732	11.1701	15.4521	13.3671	12.0324	12.0572	13.6082	15.1709	12.6419	12.8284	12.8596	12.8547	15.4111	14.1549	14.9683	14.5822	14.2067	12.5307	14.825	12.8133
ARL6	12.3084	12.7963	14.9847	14.9678	13.3343	11.9753	11.983	11.1119	11.3915	12.2671	13.9485	13.7887	12.5183	12.199	11.9086	8.79532	10.6624	13.9524	11.3096	11.4248	12.1929	12.1348	12.9121	12.9518	11.4996	12.4059	12.0819	13.0184	12.0192	12.5028	11.6001	12.5628	13.131	13.4531	11.8561	13.3036	13.5543	12.0496	11.9126	10.467	14.4657	14.3265	12.9544	14.4246
ARL6IP4	17.6276	17.0907	17.3314	18.3417	17.0702	15.635	15.5632	15.6282	15.9752	16.1233	17.2628	16.9816	17.1249	17.1061	16.9605	15.7471	16.3649	18.7032	16.3456	16.0391	15.9259	17.2266	15.9294	15.6332	16.6072	15.8393	15.2105	15.4933	16.5564	12.2529	15.2931	11.5129	17.8697	12.175	14.8221	14.2386	15.8467	16.7084	15.8295	16.7908	16.7618	15.76	16.0004	18.4753
ARL6IP5	18.0697	16.5534	19.2057	20.4756	17.6553	15.8751	16.3222	16.68	16.4026	16.807	17.9484	17.6787	19.5225	17.9232	16.522	18.0816	17.8407	18.8597	18.7211	16.5067	18.0002	17.9989	17.263	16.1125	15.6553	16.4284	16.2407	17.0644	16.3311	15.6991	15.8951	16.6004	15.779	17.1338	16.5367	17.0026	17.6553	16.3035	17.4806	18.1831	17.1654	16.1098	16.8795	18.2401
ARL8A	18.6795	17.4156	20.6477	20.4101	18.7774	17.425	19.1788	18.1553	18.9296	18.1263	18.6004	19.3509	19.8871	18.9317	17.7693	18.8675	18.0084	19.6466	19.1181	18.277	17.9029	19.6881	18.4969	18.0247	17.3778	17.3053	17.2496	18.859	16.8603	19.3667	18.154	17.411	17.9014	18.1403	18.1234	18.5806	17.6141	18.1331	17.9126	18.5136	19.2129	17.6246	18.0354	18.2865
ARL8B	18.3657	16.9704	17.4274	19.4482	18.5781	16.7991	17.5772	17.2614	17.7139	17.6709	17.8852	17.8826	19.0747	17.6729	17.0403	16.7825	17.231	18.9814	17.8054	17.4801	17.5739	18.4425	17.5607	17.7735	16.3114	12.7941	16.3593	18.0972	15.9383	16.6984	17.5766	17.2595	17.2861	17.2787	17.3265	18.1224	17.4567	16.9426	16.7994	17.4931	18.1103	17.2122	17.2507	18.6051
ARMC5	18.5752	12.65	22.1839	14.3422	15.4037	12.471	17.7599	17.3037	16.0571	12.18	12.0633	18.0098	20.9087	20.3587	16.0422	18.4374	16.0128	13.388	19.5501	18.2404	16.7958	19.4812	17.7578	15.9934	12.2536	16.8847	17.341	16.8806	12.422	13.6098	12.5669	15.7988	11.8095	16.4212	16.3458	16.1916	11.2594	10.8537	17.8482	14.9815	11.3601	9.6557	13.0234	12.8671
ARMC6	14.9707	13.0598	17.2415	14.8109	14.5181	14.5951	12.0838	13.9386	11.6777	15.8923	15.7078	13.9483	14.3547	11.8818	13.1902	15.3773	14.6324	15.5662	13.1337	13.0764	14.0873	14.8303	14.3402	12.4949	13.6273	12.297	14.4455	13.0426	12.1678	12.4171	14.9658	14.3672	15.2377	12.6523	14.9295	15.6517	14.164	13.7412	13.5029	13.0928	15.224	15.0433	15.678	16.5727
ARMC8	12.2206	12.8582	14.0542	14.8897	12.3564	13.0559	12.0677	11.925	11.6734	13.248	12.4307	14.9054	13.7785	11.6439	14.2496	11.7244	13.4039	12.4321	11.8244	11.6942	12.5055	12.5756	10.8644	13.8661	12.9742	11.7443	13.2465	12.5839	13.3358	12.3909	12.0521	11.4384	12.8757	12.7836	13.2502	11.5368	10.5462	11.3193	11.6992	11.4278	14.9426	10.8135	13.2122	14.3683
ARMCX3	16.3499	17.2968	16.3053	20.0229	16.6972	15.0159	16.7267	16.0445	16.4839	16.2695	15.8661	16.9675	17.378	15.8257	17.4371	16.2678	16.4577	15.448	15.3827	15.4873	15.7419	15.9177	15.7621	16.0629	16.9567	15.6244	15.5004	15.7087	14.6561	14.9642	15.3937	15.279	15.3735	16.6141	16.0164	16.6401	16.1832	15.8482	15.3616	13.2205	15.803	16.6913	15.809	16.8435
ARMH3	14.2944	13.7258	16.4628	16.034	14.4901	14.5482	13.4199	14.1706	12.3278	14.3121	14.6614	13.8408	13.4482	14.5813	13.4686	12.7492	14.3306	13.1187	13.9692	13.4098	14.3738	12.7514	12.921	13.7919	13.7685	13.2072	11.7604	15.2039	10.9161	13.7038	13.4424	14.9696	13.5373	15.1524	13.8116	14.3381	12.4682	12.8194	13.4528	12.8646	13.6743	12.7449	13.0784	13.3261
ARMT1	15.2163	14.1261	15.9263	16.1143	13.6998	13.8133	13.6951	14.5183	13.7636	13.3544	14.5755	14.4166	15.4962	14.7637	12.7491	12.6884	14.5868	15.19	14.0215	13.6038	13.2412	13.9364	13.2967	14.9873	13.662	13.6799	14.3683	14.5169	13.9252	14.3508	14.0556	14.1447	14.1462	14.1792	13.6543	14.5048	13.9832	13.008	13.2772	13.3671	13.9895	13.95	14.1424	16.2297
ARPC1A	17.6569	18.928	18.4327	20.6834	18.3441	18.4151	18.9568	18.6737	17.9564	18.489	18.1954	19.3665	18.1591	18.2443	18.0719	17.7483	16.3939	13.0219	12.5936	18.2412	17.4683	17.2404	17.1916	16.4961	17.7051	18.4899	18.0809	18.7071	18.7354	18.3522	18.1963	18.4171	17.0731	18.2385	17.8827	19.6041	17.6931	17.3161	17.7622	17.0708	17.6273	17.3042	16.1809	17.9282
ARPC1B	18.5273	18.657	14.3439	17.7728	19.9153	19.0252	19.0775	18.6771	19.573	18.6333	18.1699	18.1486	14.8832	17.7411	18.1194	12.4609	11.9301	17.1293	12.0373	17.8681	15.269	12.4993	13.7071	18.677	19.0501	17.8994	17.3284	18.3084	19.2091	18.4333	19.4896	18.9444	18.6408	18.5042	18.4555	18.9512	16.8011	18.0549	17.9727	17.7235	17.282	17.2652	18.0193	19.413
ARPC2	20.6359	20.1241	20.8626	20.0409	20.1379	20.2938	19.8184	20.0846	20.2513	20.4868	20.4663	20.5216	20.8958	20.3939	20.1281	19.5799	18.9491	18.4975	19.492	19.3951	19.596	20.1898	19.3622	20.8291	20.1787	20.2949	20.43	20.2934	20.3115	21.133	20.0814	20.3273	20.3148	19.8814	20.3448	20.1402	19.8331	19.1011	19.5278	19.4208	18.7852	18.7964	19.0736	20.4954
ARPC3	18.6823	19.7064	19.5812	19.4886	18.5206	19.1629	19.0784	19.0914	19.3768	19.2441	19.8208	18.3109	18.5429	18.9777	18.7977	19.6871	19.1061	18.6147	18.967	19.3329	19.0779	19.5483	19.0346	19.6558	19.1375	19.0822	18.7586	19.3848	19.8647	20.116	19.3496	19.4666	19.4015	19.2693	19.9311	19.3962	19.3622	18.9506	19.4192	19.5657	19.1553	18.3284	18.814	17.8678
ARPC4-TTLL3	19.915	18.7859	21.7736	19.6416	19.9513	18.598	18.5597	17.9234	19.1226	18.1928	20.0699	18.3301	20.9848	19.9614	17.475	20.0344	18.9628	19.9428	18.8727	17.6449	18.417	18.8242	18.1122	19.3093	18.6539	17.3648	17.9586	19.2389	19.2632	19.6395	18.5185	18.9334	18.5025	17.7179	18.7281	18.3371	18.2462	18.1062	18.4583	18.7728	19.9834	17.7144	17.9177	19.8652
ARPC5	20.8323	20.9384	19.9125	20.7727	20.7225	20.6503	20.5295	20.3655	20.5397	20.4279	21.1881	20.3027	19.8606	21.3021	20.3214	21.3579	20.818	22.1907	21.2628	20.509	20.52	21.7299	20.5137	21.0457	19.7975	20.2187	19.4636	20.4269	20.6619	21.1431	20.3847	20.7312	20.84	20.3329	21.2047	20.7196	20.9812	20.1765	21.112	21.1237	20.5012	19.2053	19.264	20.69
ARPP19	17.7843	18.296	15.7251	18.042	18.2867	18.3794	17.654	18.2012	17.1306	17.6197	18.35	16.5292	17.0064	17.5344	18.4903	15.4513	17.4995	17.7317	17.5656	14.5166	14.2356	16.1446	15.3455	12.8453	17.0006	17.079	16.2661	15.5952	16.529	17.1736	17.6005	16.984	18.1355	16.2791	16.0143	17.0068	16.4156	15.703	13.8882	15.8352	17.8922	16.4122	17.0414	18.9973
ARRB1	18.1275	17.4773	15.3101	19.3059	16.601	17.5629	17.2597	17.0944	16.5986	17.4513	17.5762	16.7154	18.1975	18.5001	15.0886	17.0529	17.0417	17.8993	17.3832	17.4045	16.7692	16.6764	16.9558	17.6648	16.7085	17.2144	16.7135	17.4461	17.3548	17.4239	17.6472	17.4466	17.0898	17.9629	17.7459	18.5843	16.5974	15.8724	17.0135	17.2665	16.7903	17.1126	17.5676	18.3932
ARRB2	17.6201	15.3052	16.1284	18.7601	17.1845	15.9765	17.033	15.9502	16.6873	16.4863	15.872	13.7585	17.8562	16.7897	15.5735	16.9706	15.8886	16.9978	16.0946	16.0004	15.6172	16.963	16.2243	17.696	15.6439	16.2067	16.6495	14.4154	15.6434	16.6571	15.867	15.6583	15.7207	16.2291	16.4278	16.9845	15.7297	15.6657	16.0843	15.166	15.3731	15.3011	15.3911	17.1604
ARRDC1	13.9092	14.4311	13.4907	16.1878	16.137	14.84	14.8262	14.3181	11.9144	14.6099	15.427	15.7845	16.6332	14.7506	13.9787	13.5238	13.8558	18.1609	14.4483	14.1501	14.1724	15.1723	14.8011	14.315	15.0867	14.4125	14.9946	14.4102	13.5702	15.3023	14.1397	14.6693	15.049	14.3729	14.3564	14.2894	14.8524	15.1103	13.7661	15.7264	15.992	15.4086	16.3752	14.0537
ARSA	16.5945	15.2369	17.4953	16.8622	15.8417	16.3385	16.9931	15.0826	14.8774	18.0235	16.5365	18.4451	17.8074	16.5153	14.8254	16.2022	14.5141	16.0493	14.2781	17.8822	16.0454	16.2952	16.3202	16.6268	15.9336	15.5948	16.2738	13.5234	14.5236	15.4926	15.5322	16.8218	15.7772	16.0664	16.4147	15.7577	16.637	15.4459	16.3669	16.0773	16.7014	17.0014	16.4299	13.4008
ARSB	16.3416	15.2479	16.4198	17.46	15.6095	15.7797	15.7708	14.6911	14.9312	16.5016	15.7905	15.8596	16.6596	15.4426	14.5018	16.1903	14.2965	15.9043	15.9823	16.09	14.1716	17.3351	15.973	15.7864	13.08	15.1499	14.8988	14.4789	15.2248	15.1284	15.3201	15.4136	15.2983	14.936	16.0485	15.6253	15.7439	14.6575	14.9997	13.4875	14.2089	13.1461	12.6219	14.4359
ARSD	14.0075	13.6225	14.8481	15.3096	14.1973	11.8193	13.9411	12.3736	13.2525	14.1027	14.2654	15.1546	14.5529	14.0661	15.3833	12.8743	14.1819	13.2191	12.6007	12.9665	13.2945	12.3954	11.5996	14.1068	13.4589	13.6218	14.5587	12.7502	13.2093	15.5433	15.2195	14.824	12.7615	13.1661	13.1901	12.4817	12.0898	13.6285	11.7358	14.2636	14.7466	13.5419	13.6426	12.0401
ARSL	15.8954	15.0104	15.1621	18.3393	16.5662	13.2866	13.3915	13.1734	13.9294	14.6562	15.8482	16.4773	16.1276	15.0986	15.8528	14.3324	14.7896	15.4384	11.9656	13.751	14.9047	12.6368	15.3795	12.9183	14.349	13.5573	14.0247	15.8584	11.7381	12.663	12.5632	13.5123	14.2732	13.6496	12.7729	12.049	12.9248	15.5549	13.2123	14.6098	14.3655	11.7866	13.194	12.6131
ARVCF	12.9955	13.5682	13.9836	14.2415	11.497	13.4191	12.4168	11.9929	12.3768	13.1094	12.8734	14.8684	14.2482	12.9812	12.4245	11.0486	11.2077	13.6282	12.9313	11.8931	10.8015	13.2864	12.8275	12.657	12.5518	12.3068	12.2381	11.6136	11.9176	12.2319	13.5039	13.4684	14.2522	14.1476	13.7003	14.0196	11.4014	13.1577	11.2291	10.5407	14.0567	13.0964	12.5094	12.6822
ASAH1	19.2699	18.2255	19.2661	20.0494	18.8866	18.3171	20.49	18.3126	20.2023	20.0352	18.0002	18.9784	19.4963	18.3675	16.3141	19.7095	18.967	19.9596	19.9189	20.0648	19.0839	19.954	19.7092	20.2349	17.1471	17.7075	17.5018	18.3812	17.5014	18.0869	17.9928	18.6032	18.8467	19.1039	19.0514	19.1989	19.0428	18.9091	19.2145	18.3307	19.1084	17.2489	17.4374	13.0935
ASAP1	14.359	13.489	14.28	14.8799	13.672	12.6185	13.3142	13.2178	13.7047	13.0882	13.3561	13.8843	14.5968	13.4521	12.6167	13.7277	13.076	14.5163	13.5319	12.3949	12.4016	13.3933	13.4327	13.8514	12.2714	12.945	11.9353	13.1399	13.0432	13.6467	14.1567	13.3415	13.6029	12.5649	13.3948	13.4876	12.5245	12.8539	13.028	12.8088	13.3419	12.6893	13.2226	14.5594
ASAP2	14.415	15.9187	17.6353	16.6849	15.1915	15.1214	15.8217	12.6323	15.0848	14.8818	15.1911	16.2972	15.2476	14.9027	15.4304	13.2775	14.0522	14.9533	13.9881	13.549	13.2863	15.0686	12.1542	14.2619	14.5206	15.9861	15.2523	15.1867	14.7759	14.6664	14.8068	15.0181	14.539	15.3173	14.5674	16.0092	13.5849	13.5895	13.9319	14.3898	14.8539	14.2943	14.3697	15.8404
ASB9	13.5636	13.7892	15.3121	13.9764	15.8789	12.0229	13.6038	12.4021	13.1309	12.4691	13.7808	13.6698	13.9825	11.7468	15.007	11.7235	13.5563	13.6021	12.6214	11.3658	12.3091	11.3892	11.8708	12.0626	11.6031	11.4892	12.6078	12.4681	13.4001	13.5204	13.8544	12.0473	12.6416	14.2758	13.0442	12.4969	13.2339	12.0966	11.4737	12.6195	15.8628	13.3134	12.6616	12.0752
ASCC2	15.3813	16.3131	16.5322	17.3443	15.2034	16.0605	16.0647	15.9822	16.1829	15.4261	15.2925	17.1103	15.9895	15.0375	15.4311	14.3365	14.2837	17.0045	14.9196	14.1899	14.546	14.5835	15.2997	15.5803	15.7772	15.5505	15.2884	15.7898	16.0752	15.7454	14.721	14.8184	15.8022	14.9487	14.4248	14.3715	15.1818	14.9699	14.5579	14.3826	15.0988	14.7805	14.8516	16.5468
ASCC3	15.2322	15.2914	16.0364	16.0618	15.0106	14.0383	14.1633	14.5534	15.0495	14.8179	15.1265	16.091	16.013	15.0171	14.4851	14.5146	14.7635	15.525	14.2858	13.9816	14.1495	15.0895	14.4448	14.5488	14.5655	14.0057	13.8228	14.3627	14.4523	13.5517	14.8112	14.3496	15.1729	14.4473	14.8242	15.046	14.5757	14.6759	14.4668	14.2974	14.5439	14.4161	14.4615	15.2746
ASDURF	14.14	14.4155	17.6712	15.0435	15.4066	14.2139	14.812	12.3323	13.8887	14.706	13.3226	13.6128	15.3122	13.1059	14.4991	12.3186	13.1549	14.2453	11.1371	11.784	11.8065	12.6809	12.449	13.5128	15.1341	14.8052	13.4554	12.154	14.6467	12.829	12.6737	12.3156	13.0151	15.0279	12.3835	11.5527	9.62913	12.4678	12.5172	10.6864	11.3936	13.0087	13.446	15.7513
ASF1B	17.1126	16.7533	16.3043	16.9429	14.0491	17.705	15.6972	16.7353	16.3026	15.9661	16.5879	14.1096	13.3056	15.8792	12.3988	16.2335	15.6046	18.3568	11.5016	15.2506	16.1195	14.6865	16.7368	12.6828	16.7012	16.8672	16.0657	13.0137	15.1979	12.4748	13.6623	11.8137	16.1311	12.7034	14.9264	12.8807	16.0602	16.4334	15.3194	15.5225	17.2285	17.3322	11.8945	13.1234
ASH2L	15.9373	15.9231	17.6109	16.8044	16.6156	15.9516	15.8013	15.6735	15.7595	15.7283	15.6419	16.1028	17.4423	15.3943	16.3051	15.3738	15.8365	17.0591	15.7343	14.9516	15.8569	15.0205	15.7589	16.1291	15.336	16.2153	15.8811	16.1171	15.7377	16.0653	15.9456	15.086	16.0498	16.0122	15.1555	15.1526	14.9622	15.4736	14.9439	15.4684	15.6785	15.5013	15.0398	15.862
ASL	18.4898	19.8861	19.3703	18.903	18.9866	19.5543	19.4472	18.2225	17.2837	19.4871	19.3334	20.4792	20.072	19.7214	18.5125	18.9079	19.4012	18.8484	18.7287	19.403	19.0033	17.0962	18.4159	19.107	19.2149	19.041	19.6812	19.1058	20.513	19.5452	18.8578	20.2561	18.5099	19.5852	18.9221	19.1073	19.7677	17.9402	19.9223	19.3895	17.0234	17.9674	18.9475	19.3387
ASMTL	16.648	14.701	15.9335	16.4669	15.0923	14.8702	15.5214	14.941	14.9714	15.4135	15.4364	15.5258	14.0396	15.7515	15.8163	14.8489	14.6381	15.4398	15.8382	16.0056	14.9004	16.3965	16.0169	15.031	15.1927	14.9554	15.4104	15.1651	15.6989	15.7542	16.4154	15.7963	14.7017	16.3794	15.7863	16.7381	15.6653	14.8903	16.2865	15.1023	14.7369	14.8607	14.9614	16.869
ASNS	17.622	16.4931	17.1151	18.5851	17.5596	17.0769	15.4337	17.4995	16.3421	16.1788	16.7893	16.821	17.1799	15.5215	17.4515	15.672	16.4637	18.9168	14.3339	15.5427	15.4495	13.5082	16.162	12.2704	17.1286	16.895	16.7428	16.3206	16.8315	17.4241	16.5073	13.6636	16.1875	16.1291	15.8589	16.8813	15.5914	15.7666	16.1568	15.953	17.083	17.6377	18.8144	19.2956
ASPH	16.5922	16.283	17.4725	17.715	16.9483	16.0367	16.827	16.1958	17.1445	16.4471	16.2057	17.2138	17.6628	15.7726	16.6535	16.7035	16.7343	18.1498	16.7647	16.2648	16.2774	17.3448	16.6502	16.6875	16.6288	15.7624	16.4146	16.4704	16.4042	16.4972	16.9335	16.34	17.0414	17.1148	16.8741	16.7946	15.2668	16.2052	15.6807	15.5892	17.1442	16.4693	17.6548	17.1553
ASPM	13.2748	13.0973	14.5034	14.1595	12.4028	16.3917	11.8072	15.0917	12.6045	13.0155	14.6511	13.1285	12.3944	15.2888	11.7764	14.3392	12.2539	12.7371	12.1798	16.2297	13.9942	11.8221	11.063	17.1322	14.9975	16.0276	12.5139	17.6098	15.997	16.3661	18.2772	14.5129	15.7209	17.6798	17.5659	18.9756	13.6081	15.2979	15.7744	14.1581	11.7432	11.5439	11.0034	13.6049
ASPN	15.1859	15.8297	15.3041	18.1158	13.3676	15.8041	16.5659	16.7287	15.2926	17.3363	14.8792	16.4889	17.6651	16.9849	13.9517	15.2076	14.5571	13.8748	20.0763	18.4423	15.3057	16.9172	15.4254	16.5176	15.1781	16.6959	17.0519	18.0188	14.2458	17.499	19.2501	17.7862	16.9642	19.2763	18.5618	18.5741	13.5443	15.2137	14.6853	14.6065	10.9423	11.5141	12.1867	12.9359
ASPSCR1	15.0739	15.5024	16.9674	16.2893	15.2024	16.0028	15.7883	15.2836	15.9481	15.4312	14.7941	15.3399	15.2839	15.0362	15	15.9873	15.7739	16.1542	15.4332	14.1839	14.4448	13.7663	14.8156	15.3814	16.0548	15.1566	15.2058	15.5191	16.793	15.535	15.7839	14.3951	14.8832	14.8237	15.0299	15.2166	14.3781	15.0386	14.4577	14.3831	16.018	14.9	15.2043	16.5746
ASRGL1	12.8438	13.2846	14.043	13.4671	13.9085	14.5217	15.5635	13.4269	11.6799	15.6021	15.4991	15.7903	12.9789	16.0645	11.3249	13.3736	15.5786	11.9108	13.1568	14.5935	13.2019	12.2387	12.6343	13.0478	11.6373	15.6238	14.9398	15.5158	15.3886	12.2298	13.2577	15.6996	15.8334	13.1195	12.2349	14.6853	14.8012	12.8387	13.3903	13.1064	14.2574	14.7358	12.0773	17.4744
ASS1	20.2552	20.0583	19.1531	18.8994	19.5688	19.5748	19.0144	19.7734	17.7063	19.0635	20.2269	19.8816	21.0109	19.4025	18.4016	21.1502	19.4652	20.848	18.6638	18.7394	20.1162	18.6581	18.5084	19.0223	19.1652	19.2388	19.0434	18.5256	20.8413	19.2012	19.0488	20.0569	18.1559	19.2801	19.7388	19.6665	19.7345	18.8312	20.008	18.5551	19.8894	18.8642	19.0398	20.0619
ASTE1	12.2474	13.8525	12.8708	13.343	12.4788	12.0354	12.916	11.5355	13.1277	12.8747	12.986	13.721	13.4144	10.0553	13.7251	12.1487	12.8288	15.2456	11.5375	11.7261	12.6049	12.4547	10.5295	12.1999	12.6943	12.697	11.9117	12.4872	11.9436	11.9043	12.201	12.1492	12.7323	13.0483	12.0862	12.5513	10.7849	11.0302	11.4413	12.2188	9.54348	13.4576	10.918	14.4445
ASXL2	12.5122	10.8624	14.4138	12.5402	11.3405	11.2461	12.1342	12.2808	11.5922	11.6903	11.7256	12.6447	13.6691	10.7817	11.9113	12.7325	12.2461	13.1885	11.7533	11.0968	12.5587	12.904	11.251	12.3419	10.5125	11.9049	12.0413	12.505	12.1975	13.3216	12.7647	12.8136	12.7719	12.5958	12.9638	12.2345	11.4839	11.3535	13.3422	12.6491	9.28589	12.5508	12.2531	13.2988
ATAD1	17.3088	16.7737	20.2921	17.3628	16.555	15.8315	16.3616	16.1133	16.6001	16.6183	16.3191	17.1292	18.6182	16.8269	17.104	15.9053	15.0136	16.9371	15.1206	15.2109	15.4016	15.138	15.3437	15.9297	16.9604	16.3914	16.6371	16.2507	14.7551	15.8096	16.692	16.9744	16.5206	15.9514	15.9239	16.3357	15.3444	16.2217	15.449	16.0931	16.4861	17.0361	16.5854	18.1232
ATAD2	14.34	13.9911	15.8699	12.8797	14.267	14.1234	13.4093	13.9865	12.1151	13.6632	14.0197	14.6528	14.0476	11.736	13.6147	12.2213	13.1279	14.4016	11.236	12.8317	12.9418	12.4223	13.049	13.1716	13.0747	12.2544	13.5743	13.1045	12.2092	12.1235	12.7729	12.5754	14.3527	14.1597	11.7592	13.711	12.2668	12.6564	11.0363	12.5044	12.6512	13.9569	14.213	12.9161
ATAD2B	13.0143	13.6157	16.1735	15.0434	11.8233	11.3768	13.3413	12.2325	13.0085	12.1135	12.1852	14.6898	12.5707	12.7608	13.0301	14.0493	13.1336	13.8809	12.5364	12.6584	13.4015	13.0492	12.7299	12.9766	11.1213	14.409	12.616	13.252	12.1113	12.9251	13.7228	11.1819	11.0724	12.3722	12.2108	13.0049	12.8077	12.6545	12.8884	12.2579	12.6185	13.3285	12.5681	13.2508
ATAD3A	18.4527	19.1318	18.9756	19.74	18.2086	18.4098	18.547	18.823	18.673	18.5761	18.4652	18.7896	19.492	18.3705	18.1754	19.1746	18.4005	20.5925	18.7435	17.7985	18.522	18.7383	18.6176	17.6762	18.9718	17.8779	18.1145	18.1936	16.0778	16.5916	18.4654	17.9112	18.2798	18.6294	18.0585	17.8935	17.8914	18.2655	18.1252	18.8222	19.0139	18.4833	19.4799	18.8557
ATAD3B	16.7141	16.5255	16.3647	17.8674	12.878	14.6655	13.5109	16.0171	15.9486	15.7145	14.4814	13.3118	16.6703	12.3929	15.272	14.1512	13.5138	18.8936	13.8409	13.0022	15.5807	15.2461	14.1007	13.1951	16.2944	11.7508	15.1645	13.0621	15.681	11.784	14.9869	15.6743	14.3555	11.8237	13.5239	13.5117	13.6449	14.4218	14.411	14.8198	14.8737	14.7757	15.679	15.2359
ATAT1	13.2319	13.0679	15.412	12.7864	12.7572	12.9784	12.441	12.458	12.2095	13.2086	13.6024	14.8423	16.65	13.3179	11.5943	12.2151	9.8611	12.6596	7.6301	11.5266	7.0035	11.2315	12.0114	13.2521	13.2252	11.3963	11.2938	12.5306	11.1528	11.9585	12.096	11.9133	13.5384	12.7585	9.84838	12.9282	6.96019	7.4342	7.74	7.59416	6.02322	11.1808	11.4016	12.4786
ATF2	12.9296	13.5308	13.3866	13.4596	12.5156	11.8106	12.5013	13.7494	12.8184	13.384	14.3897	13.1894	13.5323	12.0466	14.2201	12.9859	12.4847	13.1396	11.7829	12.714	13.1968	12.0017	11.9326	13.1422	13.5413	13.2585	11.3468	12.0612	12.4738	12.5806	13.5454	11.9616	13.6232	12.6358	12.5683	12.6995	12.7369	13.8787	12.8671	13.24	14.7272	14.1043	12.7787	12.9464
ATF6B	18.5124	13.0585	17.6325	19.7437	13.0191	12.0996	16.3782	11.9528	13.0629	12.7966	17.1194	17.1573	17.2704	18.192	16.453	19.6059	12.0842	19.4278	13.1879	17.7883	18.592	18.6237	18.8916	13.5684	17.8311	12.4291	17.3165	17.3729	16.5282	16.4959	14.6668	15.9435	12.3622	11.9278	12.7767	11.6638	18.4396	17.3291	17.7463	17.8237	19.0293	16.9153	14.2365	12.2086
ATF7	12.4156	13.0631	13.7913	14.0108	15.0542	14.2097	11.701	12.7987	13.1327	11.981	14.678	11.8449	13.9378	14.5309	13.8899	10.8943	12.9463	12.9429	12.4647	12.6689	12.9697	12.3284	13.4046	11.2157	15.5036	15.6448	12.1088	12.981	11.4365	11.9591	12.5315	11.8351	16.184	13.6086	14.5356	13.045	13.6869	14.182	13.1414	13.2228	14.309	13.8518	13.7909	12.6247
ATF7IP	12.8523	13.4805	13.6982	13.8288	11.2031	11.3333	13.6443	11.9094	12.7224	12.5491	14.396	13.7515	14.3025	11.6273	11.6271	12.3329	12.9921	14.9648	11.7573	12.0361	11.081	12.5449	12.6036	13.8028	12.2901	11.7018	12.0563	12.9182	12.3281	12.1387	12.5288	11.8458	14.4772	12.3799	12.7635	13.8692	12.9	12.5753	12.0107	11.0484	14.0137	12.8128	12.6276	12.7712
ATG101	14.5718	14.7602	15.9196	14.4024	14.0083	9.13624	12.0994	11.1732	13.5643	12.6039	14.0124	13.7191	13.9494	14.1488	12.5357	14.8712	14.1217	16.6962	13.7689	12.1274	13.2039	13.1696	13.4543	12.4105	13.0498	11.3845	12.4275	12.7619	10.7892	4.70506	12.1944	9.65348	12.4497	13.0431	13.2395	14.0687	9.96689	13.246	12.6686	11.9004	15.0797	13.5557	12.3767	15.5591
ATG14	13.8243	13.1082	14.0915	15.1012	14.7563	14.8738	11.6076	11.7741	12.7832	12.5244	12.4373	13.4589	13.3377	13.1369	11.8832	12.965	13.2782	14.8336	12.7275	12.9708	13.0128	13.5695	13.4837	13.0989	13.3726	12.9723	11.4557	12.5822	13.7769	11.3796	13.0336	11.7111	13.894	12.7079	14.0537	12.5316	13.421	12.8995	12.93	11.7447	13.5984	13.9985	12.4766	12.3175
ATG16L1	16.1017	13.6679	15.802	16.6988	15.6122	16.8256	15.6972	16.1653	15.7876	16.1823	15.985	16.2026	16.4586	15.7124	16.322	16.3584	15.7969	16.4385	15.8055	15.5702	15.7264	15.4586	14.9249	15.9604	16.4496	16.1949	16.4724	15.7201	16.374	16.3733	16.1716	16.3329	16.4938	16.5266	16.1756	16.7082	16.0023	15.4189	15.5725	16.4583	15.7832	16.0662	16.1847	17.6901
ATG2A	10.1857	13.5083	14.1288	14.676	11.8112	11.4341	13.0742	12.5466	12.2895	13.7148	11.6315	13.4969	15.8635	13.3921	12.2883	14.7398	11.4515	17.5329	14.3973	13.4101	13.0489	12.0555	13.6412	11.629	12.6384	12.6473	11.9899	12.3869	13.7995	12.0941	11.7669	12.3103	12.1622	14.5368	12.2574	12.9623	14.2304	11.3336	11.7473	13.2101	14.5668	12.7588	12.5034	13.091
ATG4B	15.5723	12.3805	15.6946	17.1962	15.0448	14.451	13.9257	14.2719	12.5411	14.0054	15.7214	14.3058	15.3652	15.0808	14.1235	15.127	14.1263	13.0438	12.407	13.9089	13.9286	13.6186	13.6634	13.365	14.2238	13.5066	14.8957	12.7068	15.226	13.983	13.8885	13.6869	12.5267	13.8389	14.093	14.7348	14.4003	11.5112	13.8909	14.6377	14.5971	15.0415	13.6011	16.8959
ATG4C	13.0524	13.1935	13.9085	14.3016	12.6557	12.4377	11.2103	12.4948	13.1752	12.4656	12.0727	13.7854	13.6939	11.7923	12.2052	11.933	12.1143	12.1262	11.4028	13.5043	12.8862	11.9551	11.5449	13.235	13.0893	11.1589	10.7451	12.0624	11.6298	11.8991	12.6885	13.6053	11.9066	12.9092	12.4122	12.9189	11.4491	11.8255	11.207	10.9153	15.3631	14.0745	15.3801	12.4644
ATG5	15.9936	16.4492	16.5155	17.4517	15.7127	15.8229	16.9162	15.4871	16.5803	15.8705	15.4061	17.0298	16.5861	15.8803	15.4434	15.6319	13.7997	17.7706	15.0178	14.9717	14.5101	13.5552	14.6053	16.2448	15.8879	15.9902	15.6041	16.7144	15.6264	15.9024	14.9733	15.8074	14.9788	14.4066	15.2629	15.0409	14.8597	13.3965	14.7734	15.5515	15.0124	14.3965	14.1782	15.694
ATG7	15.851	15.9754	17.0541	16.7422	15.9352	15.675	15.6693	15.7613	15.8716	15.4812	16.3919	16.1522	17.323	15.9127	14.6805	16.0075	16.0531	16.8893	16.2607	16.2176	15.5491	16.6028	15.4975	16.4052	15.6601	16.2385	15.8547	16.4185	16.2037	16.5283	15.8208	16.416	15.9709	16.3626	16.2149	16.0861	15.7554	15.3134	15.7219	15.5175	15.5538	15.6802	15.1159	15.9705
ATIC	19.6344	19.5999	20.0547	19.457	19.9166	20.0101	19.1657	19.743	19.103	19.2217	19.6745	19.3823	19.5421	19.5751	19.4046	19.6138	20.0594	19.7609	19.7939	19.2799	19.234	18.9234	19.167	19.2936	20.07	19.0561	19.1257	19.4178	20.4184	19.7783	19.3303	19.4826	19.6177	19.4158	19.0227	19.7239	19.3319	19.4633	19.1568	19.4822	20.8677	20.047	20.6578	21.595
ATL1	14.5593	12.8129	14.8706	17.2155	14.1448	13.2656	14.0171	13.0154	15.8307	13.9069	13.6959	13.8547	14.6986	14.661	13.228	13.369	12.2515	13.1429	13.2533	12.9725	11.6243	14.5638	12.8325	13.2529	12.6787	12.2474	14.1665	15.8496	10.7045	14.1184	15.3246	14.3965	13.1738	14.5146	14.5512	14.4198	12.7216	11.9877	12.4554	11.1826	13.4681	12.3248	13.2591	13.2338
ATL2	15.904	15.3876	16.1341	17.2814	15.3785	14.4988	15.8314	15.2745	15.5412	14.5236	15.0206	15.8553	16.1605	15.0131	15.0704	14.6256	15.0503	16.2735	15.0358	14.2062	14.8931	15.3377	15.2821	14.9123	15.622	15.1286	16.0876	15.5156	15.0426	15.2176	16.1546	14.7366	15.4967	15.9711	15.6889	16.8978	14.7181	14.5191	14.6792	15.2235	14.9257	15.7779	16.0848	16.4823
ATL3	18.5015	18.5601	19.5464	20.2344	18.3793	17.7584	18.4519	17.98	18.8373	18.3047	18.3128	18.4234	18.8581	18.625	16.7727	18.2078	17.9564	19.7488	19.3556	18.419	18.4561	20.3262	18.2721	18.5106	17.0055	18.336	18.1985	19.1127	17.595	18.3682	19.182	18.7506	18.6146	19.3209	19.2527	19.5865	18.3247	17.7968	18.8625	18.6851	18.5855	18.3614	18.2646	17.0576
ATM	15.3601	14.4823	16.1414	16.3307	14.195	13.9114	14.0673	14.4135	15.2694	14.3132	14.8426	15.3057	15.4519	15.0442	12.9663	14.4015	14.2171	15.9113	14.0699	14.0934	14.2466	15.8998	14.2619	15.0992	14.2297	14.5681	14.5131	14.5035	13.7313	14.5448	13.7035	14.193	14.4652	14.5375	14.7548	14.2403	14.5001	14.8704	14.4228	13.8738	13.6922	13.7766	14.4236	14.2206
ATOX1	18.1818	17.7648	17.9287	17.9886	17.6939	17.1588	17.6801	17.8635	17.9945	17.0338	17.0102	16.9956	17.9959	17.8165	16.6577	17.9914	18.193	16.7728	17.6879	16.7525	16.093	16.2829	15.7842	18.7022	17.5848	17.2288	17.6172	18.0867	17.8495	17.6049	15.0005	16.6902	16.759	17.3683	16.939	17.6149	16.7575	16.7373	16.8544	15.9423	16.9111	15.2521	16.6126	14.1462
ATP11A	14.1804	12.8036	14.4352	15.7879	15.2139	13.4943	9.67842	11.9001	12.6818	12.4573	13.0172	13.7817	13.9488	11.5888	14.6381	14.2585	14.444	12.6499	14.348	14.1398	14.5571	15.4914	14.6949	14.988	14.149	12.0452	11.8021	11.864	13.1264	12.4414	12.7648	12.0437	13.0833	12.0782	13.1371	11.0359	14.258	12.9509	13.8817	16.4017	15.6843	14.9999	15.886	12.933
ATP11B	18.057	14.6439	16.1487	18.1159	16.7662	16.1712	15.9791	13.7731	15.931	16.3915	16.1632	14.3026	16.9511	15.8963	16.0013	15.2853	15.6496	17.9687	16.7576	15.6952	16.5435	17.2001	15.3222	16.5252	15.6064	11.8975	16.9336	15.3433	12.0418	15.4335	15.9939	15.2202	15.2645	15.85	18.3555	17.4567	16.2273	15.237	16.1275	16.1526	15.6568	15.0224	15.3671	17.1395
ATP11C	14.0209	13.8167	13.4699	14.4799	14.1664	15.2731	14.0013	13.4048	14.898	14.2146	14.5775	14.113	12.9653	13.887	15.0581	14.0843	13.0871	13.5523	11.8697	13.9594	13.577	13.6965	12.9804	12.0211	13.9444	15.2479	14.5404	13.4018	12.2084	12.4711	14.6215	14.165	13.5683	13.5101	12.9414	12.7495	13.4463	13.2643	13.9154	13.4519	14.024	14.2416	13.943	13.9327
ATP13A1	18.1323	18.1893	18.9552	19.1146	18.3444	17.2294	17.896	17.456	18.3282	18.1614	18.1173	18.8863	18.635	17.8156	17.2621	18.4334	17.7247	19.3019	17.2109	16.3772	17.7148	18.2462	18.1511	17.771	17.6718	17.3945	17.3096	17.4861	17.1165	17.5175	17.5211	17.9784	17.5653	17.5416	17.0366	16.9816	17.8123	16.6943	17.8572	17.0555	18.1694	17.1382	18.1547	19.5872
ATP13A2	14.0685	12.362	14.8304	14.8711	12.7086	12.1152	13.1553	12.3356	12.7427	13.0669	12.2029	13.0928	13.403	12.9283	15.3556	15.6014	11.5924	12.9348	12.4433	11.355	11.3098	11.2536	13.5128	12.1583	11.7424	12.7673	11.5001	12.4035	10.8943	11.8708	12.3617	12.7904	11.6731	12.9872	12.9458	14.5203	12.0537	10.862	11.85	15.4471	13.5015	15.8453	16.4632	13.4127
ATP1A1	19.9138	20.8157	20.1293	20.8833	20.5678	21.0401	20.8749	19.8349	19.6983	21.0403	20.6191	21.468	20.6687	21.2449	20.9268	19.8964	19.5937	19.9622	19.723	20.2561	19.8875	18.9415	20.4338	19.6193	20.335	20.7994	20.1804	20.7596	19.7888	19.5427	19.4832	20.971	19.2828	19.8842	19.7158	19.4847	20.2799	19.3965	20.5111	20.333	19.3749	19.0546	20.2399	19.3671
ATP1A2	13.0703	14.1066	15.834	14.494	13.5069	12.026	14.2928	11.1516	11.9545	17.1045	15.7589	13.2532	12.8407	11.7756	12.939	9.93724	10.1614	12.5807	13.1595	12.8787	14.5347	15.0259	12.9602	12.2691	11.567	12.3885	13.1543	14.7999	16.9762	12.9226	14.391	11.9743	11.7736	14.9204	13.9168	16.465	13.9549	13.5336	15.5862	10.9766	13.5622	14.6596	10.7932	15.6267
ATP1B1	18.9714	19.9675	18.9102	19.9852	20.0881	19.5806	20.2401	18.9751	18.4511	20.1642	19.8986	20.4073	19.4892	19.9303	20.1993	18.9423	18.9847	21.7308	18.5928	18.9393	18.5328	17.5117	19.7613	18.8198	19.3886	19.5962	18.7686	20.2222	18.4981	18.6955	18.9267	20.2651	18.484	18.9174	18.7193	18.9666	19.3373	18.2207	19.6002	19.231	18.0262	18.3788	18.7046	14.6489
ATP1B3	17.545	17.3431	17.4484	18.4012	16.4218	16.9728	17.8524	17.1614	18.0346	17.3377	16.4885	18.4249	18.1493	17.5584	16.6314	16.942	16.4156	17.2394	16.1366	17.0087	17.4423	17.4504	16.6552	17.2134	16.6443	16.7082	16.6994	16.9409	15.6363	16.3902	17.018	17.3451	16.0044	16.4364	16.1888	16.5684	16.0088	16.3918	16.84	16.1677	16.3843	15.3958	17.8514	15.892
ATP23	13.9267	12.8807	13.5605	13.9233	13.0644	14.4236	15.8813	13.7301	13.0245	15.1351	13.5659	15.4088	14.3866	14.2993	14.2883	12.7331	13.2231	13.6253	12.0737	14.0503	12.4336	12.6538	14.6285	13.4023	12.5405	14.3837	13.3899	15.7595	12.6945	12.4072	13.5798	13.6437	13.0317	13.9773	12.4925	13.7722	13.4137	12.6748	13.1043	11.9191	13.574	12.5658	12.7725	12.696
ATP2A1	13.747	13.2532	13.4291	15.0811	11.1286	12.9454	13.7913	12.6737	13.124	13.1004	12.1635	13.8956	13.686	13.5508	12.0566	11.3939	8.32303	13.0357	11.7505	10.888	10.5398	12.6091	10.9947	13.0569	13.7404	13.0933	11.6737	13.2915	12.997	14.4934	12.4952	13.331	12.7199	13.7735	11.62	11.1244	10.6151	10.7541	11.0487	11.3546	13.4244	12.1495	12.2664	12.8336
ATP2A2	19.6519	20.3905	20.5273	20.4188	19.8694	19.091	20.2581	19.6558	20.1859	19.8473	19.7726	20.2657	20.0096	19.639	20.2304	19.6213	19.6622	20.9659	19.4184	18.7875	19.5429	19.6405	19.876	19.995	19.6074	19.4152	19.49	19.7896	19.1304	19.1988	19.6538	19.7353	19.5585	19.5446	19.5666	19.5371	19.5135	19.231	19.4681	19.8677	19.361	19.868	19.6138	21.2021
ATP2A3	18.029	17.8656	18.3135	18.4912	17.4034	16.6452	17.8388	15.5548	17.3796	18.4252	18.0739	19.4529	19.0018	18.9069	17.4972	18.0705	16.9601	17.1775	16.654	17.5855	17.4099	17.5142	17.7866	17.224	16.9134	17.2814	17.3852	17.0294	17.1626	15.6311	16.9186	18.7144	16.1437	17.2188	17.5884	17.3658	18.0854	16.1194	18.1468	16.8002	13.9058	14.108	14.6239	15.692
ATP2B1	16.802	17.4258	17.623	18.6036	16.0743	16.2627	17.6999	16.2172	17.1014	17.1154	16.5647	17.2639	17.4081	17.0251	16.2785	16.318	15.2775	16.6471	16.837	16.3288	15.9277	17.5001	16.3905	16.3672	15.401	15.799	16.2958	17.2854	15.0864	15.18	17.1348	16.5876	16.6144	17.4397	16.8297	18.419	16.3141	15.9163	16.2723	15.5657	15.7327	16.1038	15.7551	17.2789
ATP2B3	12.0262	12.9452	14.1413	13.6099	14.4261	11.059	16.1152	17.6346	15.001	14.4207	13.5306	15.8263	13.972	13.2011	14.3685	13.9962	13.4934	13.5163	13.5389	15.1503	15.1416	15.022	14.0121	11.4535	15.5437	12.2535	15.9474	14.2307	11.2241	12.5686	16.5909	12.1202	14.5163	13.0719	15.8219	16.2956	15.1538	14.4988	15.4841	11.4028	11.1847	15.5521	14.8089	14.834
ATP2C2	14.9322	15.6835	14.2672	16.7293	13.2517	14.9593	14.7755	11.1133	14.3179	15.4432	14.0801	16.09	17.6521	14.2306	14.553	10.2637	13.6442	15.0721	12.0733	13.936	11.1374	11.2491	14.1808	15.5189	13.916	15.4334	13.5555	13.1338	15.1143	13.6848	12.7316	15.1842	14.645	12.7409	11.7417	13.9653	15.2564	10.3969	13.8236	13.6095	11.9064	13.6644	13.8222	14.7702
ATP5F1C	19.1109	21.7448	21.1366	20.8604	20.2542	21.0079	21.6379	20.5785	20.8468	21.5199	20.8287	21.5682	19.9892	21.2593	20.4987	19.7623	19.5578	19.9746	20.2838	20.5947	19.1973	19.6251	19.0241	20.5141	20.6158	21.233	20.4752	20.4417	18.6293	20.046	20.7894	20.8207	20.2444	20.6391	20.1844	20.8769	19.5441	20.2465	20.3489	19.8935	20.5776	21.4777	20.4434	18.9011
ATP5F1D	20.1757	19.7836	22.0019	14.2423	20.1067	19.1139	18.2198	18.031	17.4972	19.1554	20.8105	18.3104	21.4555	20.9451	18.1004	20.5803	18.5378	13.3255	19.7275	19.6486	18.8995	18.104	18.4756	18.3927	17.7483	19.5336	18.6588	18.5333	17.8238	17.4322	16.6795	17.6032	16.2622	18.3106	18.1405	18.0125	18.3093	18.9647	19.6341	19.2196	20.6595	18.8443	18.4319	19.464
ATP5F1E	12.4495	20.1123	15.6889	14.1749	18.5437	20.8683	20.5707	18.4292	17.9856	21.6551	20.3975	18.7354	12.8843	19.779	19.8817	19.4494	18.8325	14.0479	19.5313	20.2067	16.0534	17.4926	18.0313	19.1859	18.841	19.8767	18.6998	18.3725	18.3266	18.9309	20.2626	20.4757	19.5944	19.7143	19.4215	20.5042	19.0759	20.3281	18.757	18.589	21.0514	21.751	20.7879	18.2243
ATP5IF1	17.6487	15.7759	19.5869	17.9696	15.0251	15.3215	15.6737	15.4795	16.118	16.6151	15.6395	16.9449	15.2523	16.4849	15.1353	17.3874	16.1175	16.0826	16.9234	15.1987	15.5407	14.9107	16.5585	16.3254	17.0168	15.7852	16.3201	14.4963	14.1105	14.4021	16.3486	16.6144	15.5088	16.7021	16.2805	16.0994	14.9106	15.4232	15.6854	14.8807	16.1999	15.4249	15.0064	15.4544
ATP5MD	16.3163	17.443	18.2134	19.6451	16.7857	15.9635	17.6418	15.8175	17.0618	16.9263	18.7509	16.3437	16.4406	17.8979	15.3661	16.324	15.0148	17.5124	16.3968	16.3521	16.2938	17.112	17.8386	13.1913	15.5956	16.5352	14.5071	15.8979	12.3546	13.5525	14.5391	16.3207	14.9933	15.9944	13.4087	17.0321	16.1165	16.1579	16.0345	16.4825	17.3164	16.702	15.6598	12.7367
ATP5ME	19.446	19.9861	20.8203	19.5841	19.1575	20.2018	21.4893	20.0049	20.4622	20.8193	19.6152	20.5341	21.011	20.4712	18.7047	20.042	17.9074	20.7666	19.0615	19.4651	19.2765	20.224	19.7837	19.5344	18.4887	19.2243	18.3151	20.1693	16.6234	19.655	20.223	20.0491	19.9824	20.0169	19.0345	20.1277	19.004	19.232	19.4574	19.6648	19.7466	20.3795	19.5185	18.4044
ATP5MF-PTCD1	15.4254	15.4004	16.8784	17.5546	15.6971	15.389	16.3219	15.6102	15.305	15.8209	16.4762	14.6431	17.9662	16.5796	14.7752	16.2154	15.8286	18.101	16.2964	15.126	15.8552	16.6374	16.7097	12.4628	16.0803	14.3169	15.7724	15.1658	15.2164	12.8251	15.3792	14.313	14.3171	13.7656	13.6516	15.1472	14.8069	15.5522	15.1035	15.6455	16.6726	15.7926	16.7926	17.1612
ATP5MG	20.1533	20.5439	20.5197	20.2475	19.7237	19.6008	21.5021	20.065	20.5455	20.6622	19.7701	19.8513	20.4836	20.2955	18.762	19.3254	18.0945	18.2336	19.4494	18.6521	18.0979	18.9751	19.567	18.2765	18.0304	19.0211	17.866	20.502	15.3853	16.7913	19.4924	19.2364	19.1842	19.2055	18.0453	19.2817	17.9728	17.9944	18.371	18.4593	19.7361	19.3826	18.7172	17.2949
ATP5MPL	18.7203	19.0211	19.5064	17.8298	18.1685	17.7197	19.8909	18.9495	19.4528	19.877	18.6428	19.6098	19.6542	19.4017	17.8707	17.7576	17.2992	18.0762	18.3913	17.6391	16.8767	18.4664	18.8501	17.3685	13.5131	16.447	15.5265	19.2017	11.2676	12.9736	18.443	18.2092	17.8006	16.981	16.4728	18.3419	17.1078	17.4572	17.5808	17.913	19.1731	18.3659	18.0355	12.6766
ATP5PB	18.6236	20.0851	18.4232	20.072	18.4884	19.7342	20.7117	19.6008	20.0831	20.2355	19.4377	19.8197	17.9897	20.1077	18.6549	18.6626	17.6602	18.3605	19.0786	19.2864	18.3801	18.6638	19.3653	18.9453	18.5776	19.5503	18.4652	19.6576	16.9289	17.9183	19.4595	19.835	18.8805	19.3568	18.6862	19.583	18.5753	18.9151	19.3167	18.8038	19.0455	19.4807	18.6865	18.3864
ATP5PD	21.046	22.1061	20.4002	22.346	20.3669	21.0869	22.3331	21.5709	21.745	22.4822	21.2009	21.9485	21.0295	21.4215	20.9708	21.1665	19.8365	21.1701	20.9121	20.5807	20.4972	21.0632	21.2403	20.5499	20.6437	21.3234	20.5169	21.0223	19.163	19.632	21.2591	21.4642	20.8174	20.7534	20.4367	21.2651	20.4865	20.6519	21.043	20.7141	21.3025	21.6019	20.6637	19.5962
ATP5PF	18.6705	19.0789	19.0866	19.3815	18.2356	18.8762	19.8662	18.4552	19.0293	19.0875	18.5905	20.5611	18.6505	19.0069	17.7936	16.2646	16.3919	18.6571	16.7615	18.3339	17.7518	16.5568	18.3307	19.4416	18.231	18.7418	18.4184	18.6888	16.7432	18.1754	18.5944	18.8469	18.1124	19.0505	18.9854	19.0619	17.6797	17.6473	17.8834	17.2416	16.8848	18.9925	15.8797	18.2561
ATP5PO	20.182	21.1808	20.2922	20.9748	19.816	20.72	21.3151	20.327	20.4775	21.1561	20.6783	21.4606	21.0493	21.1639	20.0606	20.653	19.7134	20.4977	20.6556	20.1801	19.6525	20.019	20.2239	20.0004	20.2334	20.8558	20.3648	19.8869	18.4942	19.591	20.2379	20.823	20.1482	19.8961	20.0814	20.297	19.7464	20.4516	20.2171	20.0322	20.8178	21.2872	20.0868	19.7804
ATP6AP1	15.3976	15.7259	16.7542	18.0411	15.8634	15.8127	12.4294	13.2565	12.8057	14.5988	15.1247	17.8423	15.6555	16.0924	15.4343	14.8695	15.7362	16.8352	14.5533	15.2001	15.6596	16.6208	14.606	16.2273	13.152	13.8986	15.3779	12.5277	13.4637	14.8522	14.5347	14.3165	14.4957	15.6467	14.231	15.2522	14.3402	14.5567	15.3836	16.2789	16.4006	15.1163	16.2036	13.6428
ATP6AP2	14.6259	14.3055	16.2731	16.0367	14.7168	14.0413	15.4736	14.9557	15.3487	14.1681	13.4348	15.3868	14.5988	13.3788	16.0681	14.5816	12.906	12.508	12.2169	12.4228	12.8523	14.081	13.1659	15.5331	15.1717	14.8568	15.6724	14.9692	15.1977	16.0508	13.0264	14.5786	15.0914	15.4129	13.4098	14.2342	12.9412	12.8061	13.5819	13.8497	15.4368	15.741	15.5277	16.1528
ATP6V0A1	16.781	16.5201	17.4894	18.5947	15.6376	16.3769	16.6795	15.7845	16.5133	16.3773	15.8999	17.2389	17.2518	16.1093	16.0843	16.258	16.2727	16.7934	15.6548	16.3164	15.9484	16.3598	15.0955	17.0948	16.3194	15.4122	15.6994	15.7469	14.7618	15.1572	16.1147	15.954	16.0673	16.3149	15.5469	16.2008	16.2065	15.6785	15.7642	16.7275	16.7647	17.099	17.0415	13.853
ATP6V0C	16.0517	14.0637	15.3456	16.1292	15.6983	13.5981	14.9052	11.3663	15.6111	15.0445	15.0738	14.0885	15.1037	15.4745	12.5166	15.0665	14.3192	16.3388	14.5059	15.1633	14.6032	16.0133	14.8423	12.7141	11.9999	12.074	12.2325	13.9661	11.3755	11.7737	12.62	11.1573	11.8493	11.9723	14.6403	12.7007	15.6712	14.7209	15.1528	16.1943	14.5422	11.5452	16.5169	14.0276
ATP6V0D1	18.8417	19.2419	19.1092	20.2916	18.382	19.0487	19.5212	18.2491	19.2223	18.6845	19.2331	18.9587	19.2382	19.0688	18.8086	18.982	18.9888	19.6356	19.399	19.1719	18.9814	19.5286	18.2887	20.1887	19.0737	18.5584	18.1851	18.1675	17.8825	20.3357	19.1518	18.9739	18.6166	17.781	19.3806	19.1191	18.6909	18.0696	18.2741	19.8095	18.9836	19.9121	19.8642	17.6912
ATP6V1A	18.083	18.4353	18.4341	18.7542	17.846	17.984	18.1378	18.1411	18.1291	18.247	18.3305	18.3176	18.4467	18.1956	18.2266	18.174	18.4439	17.9236	18.1687	18.4773	17.7623	18.8907	17.9503	18.7806	17.1432	17.9251	17.4241	18.0511	18.0158	18.2608	18.139	18.1875	17.6731	18.0348	18.1229	18.2063	18.0599	17.7577	18.0218	18.1786	18.8376	18.1932	17.5238	18.0308
ATP6V1C1	17.921	18.5621	17.9125	18.8049	17.3988	17.7865	18.3082	17.8699	18.3723	18.111	17.5538	18.3615	18.3555	17.335	17.3672	17.3872	17.6878	18.4048	17.5015	17.4041	17.4696	18.1665	17.7085	18.7845	17.7336	17.8546	17.4703	17.9009	17.641	17.9735	17.7225	17.7637	17.7519	17.844	18.1369	17.6821	17.6665	16.8052	17.0672	17.3101	17.843	17.3817	18.157	17.3641
[truncated: 6,216 more rows]

## Sheet: PDOs placenta ID matrix 
Sample	PDO1-EOCRC18	PDO2-SOCRC26	PDO3-SOCRC27	PDO4-EOCRC8
AAMP	16.5527	15.9155	15.4011	14.929
[truncated: 932 more rows]

## Sheet: Clusters
gene	cluster
ACADSB	1
ACAP2	1
[truncated: 931 more rows]

## Sheet: Selected Pathways
Genes	Pathways
[truncated: 343 more rows]
