# Supplementary material for: Early-Onset Colorectal Cancers Exhibit Distinctive Placental-Like Features
Source: Research Square preprint supplement (doi:10.21203/rs.3.rs-7193450/v1), 2025-08-06
Supplement: Supplementary file 3 [file 77edda0f74afde99fa021323.xlsx]

## Sheet: README
Table description	Supplementary Table S5. Sample and experimental details of RNA-ISH and RNA-seq data
Sheet name	Description
Samples	List of EOCRC and SOCRC patients enrolled in this study along with corresponding age
Column name (sheet "Samples")	Description
Samples	Patient identificative number
Year of biirth	Year of birth the patients enrolled in the study
Type of tissue	Indication of type of tissue reveived and used in the study
Column name (sheet "RNAseq samples")	Description
Patients	Patient identificative number
Year of biirth	Year of birth the patients enrolled in the study
Type of tissue	Indication of type of tissue reveived and used in the study
Experiment	Indication of RNAseq experiment detail
Reads (M)	Number of million of reads obtained by sequencing
Column name (sheet "RNAseq TE DEA")	Description
TE subfamily	Differentially expressed TE subfamilies names
TE family	TE families of differentially expressed TE subfamilies
TE class	TE class of differentially expressed TE subfamilies
log2FoldChange	log2 Fold change value of the differential expression analysis
pvalue	pvalue of the differential expression analysis
Column name (sheet "ISH samples")	Description
Patients	Sample identificative number
Year of birth	Year of birth the individuals enrolled in the study
Type of tissue	Indication of type of tissue reveived and used in the study
Experiment	Indication of figure-to-patient correspondence in the ISH experiment

## Sheet: Patients
Patients	Year of birth	Type of tissue
EO-CRC1	1983	Normal
EO-CRC2	1982	Cancer and Normal
EO-CRC3	1987	Cancer and Meatastasis and Normal
EO-CRC4	1984	Cancer and Normal
EO-CRC6	1981	Cancer and Normal
EO-CRC7	1985	Cancer and Meatastasis and Normal
EO-CRC9	1980	Cancer and Normal
EO-CRC9	1980	Cancer and Normal
EO-CRC31	1985	Metastasis
EO-CRC32	1975	Metastasis
EO-CRC33	1974	Metastasis
EO-CRC8	1998	Cancer and Normal
EO-CRC10	1989	Cancer
EO-CRC12	1981	Cancer
EO-CRC27	1982	Normal and cancer
EO-CRC28	1978	Normal and cancer
EO-CRC29	1982	Normal and cancer
EO-CRC25	1993	Normal and cancer
EO-CRC15	1988	Normal and cancer
EO-CRC18	1989	Normal and cancer
EO-CRC24	1993	Normal and cancer
EO-CRC30	1988	Cancer
EO-CRC34	1989	Cancer
EO-CRC38	1977	Cancer
EO-CRC35	1993	Cancer
EO-CRC36	1981	Cancer
EO-CRC37	1984	Cancer
SO-CRC18	1936	Normal and cancer
SO-CRC19	1946	Normal and cancer
SO-CRC20	1947	Normal and cancer
SO-CRC7	1950	Normal and cancer
SO-CRC21	1954	Normal and cancer
SO-CRC22	1932	Normal and cancer
SO-CRC23	1940	Normal and cancer
SO-CRC10	1942	Normal and cancer
SO-CRC6	1958	Normal and cancer
SO-CRC3	1966	Normal and cancer
SO-CRC1	1971	Normal and cancer
SO-CRC2	1971	Normal and cancer
SO-CRC24	1964	Cancer
SO-CRC25	1956	Cancer

## Sheet: RNAseq sample
Patients	Year of birth	Type of tissue	Experiment	Reads (M)
EO-CRC1	1983	Normal	RNAseq 100 PE	16.4
EO-CRC2	1982	Cancer	RNAseq 100 PE	19.2
		Normal		21.8
EO-CRC3	1987	Cancer	RNAseq 100 PE	16.6
		Normal		20.8
		Metastasis		17.8
EO-CRC4	1984	Cancer	RNAseq 100 PE	19.5
		Normal		17.1
EO-CRC6	1981	Cancer	RNAseq 120 PE	38.4
		Normal		38
EO-CRC7	1985	Cancer	RNAseq 120 PE	38.1
		Normal		49
		Metastasis		38,6
EO-CRC8	1998	Cancer	RNAseq 120 PE	37,8
		Normal		39,5
EO-CRC9	1980	Cancer	RNAseq 120 PE	36,5
		Normal		36,1
EO-CRC10	1989	Cancer	RNAseq 120 PE	61.5
EO-CRC12	1981	Cancer	RNAseq 120 PE	29,6
EO-CRC31	1985	Metastasis	RNAseq 100 PE	41,7
EO-CRC32	1975	Metastasis	RNAseq 100 PE	19,6
EO-CRC33	1974	Metastasis	RNAseq 100 PE	16

## Sheet: RNAseq TE DEA
EOCRC vs N_EOCRC						M_EOCRC vs N_EOCRC						M_EOCRC vs EOCRC
TE subfamily	TE family	TE class	log2FoldChange	pvalue		TE subfamily	TE family	TE class	log2FoldChange	pvalue		TE subfamily	TE family	TE class	log2FoldChange	pvalue
HERVKC4-int	ERVK	LTR	1.20087	0.0251269		LTR7Y	ERV1	LTR	2.43251	0.00190401		LTR7Y	ERV1	LTR	1.95434	0.00516016
MER41G	ERV1	LTR	1.18432	8.56779e-06		HERVH-int	ERV1	LTR	1.29396	0.0183619		HERVH-int	ERV1	LTR	1.03981	0.0462564
LTR24C	ERV1	LTR	1.01717	0.0103571		MER65-int	ERV1	LTR	-3.21812	0.000353295		HERVK11D-int	ERVK	LTR	-3.08291	0.0441726
LTR7Y	ERV1	LTR	1.01294	0.00516462		MER57C1	ERV1	LTR	-2.49828	0.0020607		MER65-int	ERV1	LTR	-2.92939	0.000884492
LTR108a_Mam	ERVL	LTR	0.969712	0.0366633		LTR10B1	ERV1	LTR	-2.39666	0.0344006		LTR10B1	ERV1	LTR	-2.326	0.0430957
ERV24_Prim-int	ERV1	LTR	0.794241	0.0101739		MER61D	ERV1	LTR	-2.11848	0.0453979		LTR14C	ERVK	LTR	-2.0284	0.0230749
HUERS-P3b-int	ERV1	LTR	0.760562	0.00443438		HERVS71-int	ERV1	LTR	-1.86983	0.00279594		LTR2C	ERV1	LTR	-1.75634	0.0044311
HERVH-int	ERV1	LTR	0.665129	0.00311827		LTR1B0	ERV1	LTR	-1.77444	0.0196875		HERVS71-int	ERV1	LTR	-1.72783	0.00881798
HERVFH19-int	ERV1	LTR	0.637979	0.0429743		LTR22A	ERVK	LTR	-1.72339	0.0139271		LTR1B0	ERV1	LTR	-1.71895	0.030011
LTR35B	ERV1	LTR	0.634399	0.0124238		LTR2C	ERV1	LTR	-1.69937	0.010176		LTR22A	ERVK	LTR	-1.6631	0.022341
PABL_A-int	ERV1	LTR	0.622809	0.0132537		LTR14C	ERVK	LTR	-1.67617	0.0436759		MER51-int	ERV1	LTR	-1.59323	0.0108425
PABL_B	ERV1	LTR	0.617254	0.0394436		HERVK14C-int	ERVK	LTR	-1.64745	0.0390967		HERV9N-int	ERV1	LTR	-1.40675	0.0340339
HERV4_I-int	ERV1	LTR	0.582329	0.0250828		MER51-int	ERV1	LTR	-1.58258	0.00957392		HERVE-int	ERV1	LTR	-1.38595	0.0163576
HERVIP10F-int	ERV1	LTR	0.570989	0.0154943		HERVE-int	ERV1	LTR	-1.49525	0.00912077		MER89-int	ERV1	LTR	-1.2478	0.0499342
HERVK14-int	ERVK	LTR	0.548193	0.0301296		LTR54B	ERV1	LTR	-1.41061	0.0351145		HERVK-int	ERVK	LTR	-1.16881	0.0365276
MER61B	ERV1	LTR	0.528221	0.0155933		LTR12	ERV1	LTR	-1.39414	0.0130107
MER57C1	ERV1	LTR	-1.43113	0.00287347		MER89-int	ERV1	LTR	-1.27263	0.0434437
LTR2C	ERV1	LTR	-1.20028	0.00124376		HERVK-int	ERVK	LTR	-1.26339	0.025753
X7D_LINE	CR1	LINE	-1.08798	0.0473259		L1MCb	L1	LINE	-1.1114	0.0496223
MER68C	ERVL	LTR	-0.981255	0.0155544
LTR12	ERV1	LTR	-0.739217	0.000959195
LTR86C	ERVL	LTR	-0.678849	0.039979
LTR2752	ERV1	LTR	-0.66408	0.0068571
HERVS71-int	ERV1	LTR	-0.511318	0.0458201
MER51-int	ERV1	LTR	-0.508171	0.0418266

## Sheet: ISH sample
Patients	Year of birth	Type of tissue	Experiment
EO-CRC12	1981	Cancer	RNA ISH
EO-CRC8	1998	Normal and cancer	RNA ISH
EO-CRC10	1989	Normal and cancer	RNA ISH
EO-CRC27	1982	Normal and cancer	RNA ISH
EO-CRC28	1978	Normal and cancer	RNA ISH
EO-CRC29	1982	Normal and cancer	RNA ISH
EO-CRC25	1993	Normal and cancer	RNA ISH
EO-CRC15	1988	Normal and cancer	RNA ISH
EO-CRC18	1989	Normal and cancer	RNA ISH
EO-CRC24	1993	Normal and cancer	RNA ISH
EO-CRC30	1988	Cancer	RNA ISH
EO-CRC34	1989	Cancer	RNA ISH
EO-CRC38	1977	Cancer	RNA ISH
EO-CRC35	1993	Cancer	RNA ISH
EO-CRC36	1981	Cancer	RNA ISH
EO-CRC37	1984	Cancer	RNA ISH
SO-CRC18	1936	Normal and cancer	RNA ISH
SO-CRC19	1946	Normal and cancer	RNA ISH
SO-CRC20	1947	Normal and cancer	RNA ISH
SO-CRC7	1950	Normal and cancer	RNA ISH
SO-CRC21	1954	Normal and cancer	RNA ISH
SO-CRC22	1932	Normal and cancer	RNA ISH
SO-CRC23	1940	Normal and cancer	RNA ISH
SO-CRC10	1942	Normal and cancer	RNA ISH
SO-CRC6	1958	Normal and cancer	RNA ISH
SO-CRC3	1966	Normal and cancer	RNA ISH
SO-CRC1	1971	Normal and cancer	RNA ISH
SO-CRC2	1971	Normal and cancer	RNA ISH
SO-CRC24	1964	Cancer	RNA ISH
SO-CRC25	1956	Cancer	RNA ISH
