# Supplementary material for: Early-Onset Colorectal Cancers Exhibit Distinctive Placental-Like Features
Source: Research Square preprint supplement (doi:10.21203/rs.3.rs-7193450/v1), 2025-08-06
Supplement: Supplementary file 4 [file 9f5e931bcf145530bb0bf4b8.docx]

**Supplementary Table 1A**. Clinicopathological features of early-onset colorectal cancers (n=33) compared to standard-onset colorectal cancers (n=27) included in the present study.

| **Clinicopathological features** | **Early-onset colorectal cancer (N=33)** | **Standard-onset colorectal cancer (N=27)** | **Statistical significance**  **(p)*** |
| --- | --- | --- | --- |
| Age at diagnosis, median (range) | 35 (22-44) | 71 (50-88) | 0.0001 |
| Sex, N (%)  *Male*  *Female* | 16 (48)  17 (52) | 12 (45)  15 (55) | 0.7994 |
| Source of tissue analyzed, N (%)  *Surgical resection*  *Solid biopsy* | 20 (61)  13 (39) | 27 (100)  0 (0) | 0.0001 |
| Pre-sampling treatment, N (%)  *Yes*  *No* | 9 (27)  24 (73) | 3 (11)  24 (89) | 0.1220 |
| Centre of enrolment, N (%)  *GOM Niguarda, Milan*  *IRCCS San Raffaele, Milan*  *VHIO, Barcelona* | 23 (70)  6 (18)  4 (12) | 23 (85)  0 (0)  4 (15) | 0.0545 |
| FDR diagnosed with colorectal cancer, N (%)  *Yes*  *No*  *---*  *Unknown* | 1 (3)  31 (94)  1 (3) | 3 (11)  10 (37)  14 (52) | 0.0753 |
| Primary tumor sidedness, N (%)  *Left or rectal ***  *Right ^* | 23 (70)  10 (30) | 15 (56)  12 (44) | 0.2920 |
| Histology, N (%)  *Adenocarcinoma NOS*  *Mucinous adenocarcinoma*  *Signet ring cell carcinoma* | 26 (78)  6 (19)  1 (3) | 22 (82)  5 (18)  0 (0) | 0.9999 |
| Grading, N (%)  *1-2*  *3*  *---*  *Unknown* | 14 (42)  8 (24)  11 (34) | 16 (59)  10 (37)  1 (4) | 0.9999 |
| Stage at diagnosis, N (%)  *I*  *II*  *III*  *IV* | 3 (9)  2 (6)  10 (30)  18 (55) | 0 (0)  7 (26)  10 (37)  10 (37) | 0.0529 |
| Somatic microsatellite status, N (%)  *Stable (MSS)*  *Unstable (MSI)^^*  *---*  *Unknown^^* | 30 (91)  2 (6)  1 (3) | 27 (100)  0 (0)  0 (0) | 0.4950 |
| *RAS* status, N (%)  *Mutant*  *Wild type*  *---*  *Uknown* | 14 (42)  10 (30)  9 (28) | 7 (26)  8 (30)  12 (44) | 0.5254 |
| *BRAF* status, N (%)  *Mutant*  *Wild type*  *---*  *Unknown* | 3 (9)  19 (58)  11 (33) | 1 (4)  13 (48)  13 (48) | 0.9999 |

*Keys: * Fisher’s Exact Test was performed. ** Located in caecum, ascending colon, liver flexure and transverse colon. ^ Located in splenic flexure, descending colon and sigmoid colon. ^^ In these patients, Lynch syndrome was ruled out by performing extended germline paneling, even if the tumor somatic mismatch repair status was not assessed. NOS, not otherwise specified. FDR, first-degree relative. MSS, microsatellite stable. MSI, microsatellite unstable. N, number. GOM, Grande Ospedale Metropolitano. VHIO, Vall d’Hebron Institute of Oncology. IRCCS, Istituto di Ricovero e Cura a Carattere Scientifico.*

**Supplementary Table 1B**. The type of omics performed in our cohorts of early-onset (N=33) and standard-onset (N=27) colorectal cancer according to tissue availability.

| **Type of omics performed** | **Early-onset colorectal cancer (n=33)** | **Standard-onset colorectal cancer (n=27)** | **Statistical significance**  **(p)*** |
| --- | --- | --- | --- |
| *Proteomic profiling, N (%)*  *Yes*  *No* | 21 (64)  12 (36) | 19 (70)  8 (30) | 0.7836 |
| *Transcriptomic profiling, N (%)*  *Yes*  *No* | 11 (33)  22 (67) | 0 (0)  27 (100) | 0.0006 |
| *In-situ-hybridization for HERV-H testing, N (%)*  *Yes*  *No* | 16 (48)  17 (52) | 14 (52)  13 (48) | 0.9999 |
| *Proteomic and transcriptomic/ISH profiling, N (%)*  *Yes*  *No* | 7 (21)  26 (79) | 8 (30)  19 (70) | 0.5536 |

*Keys: ISH, in-situ hybridization. N, number.*
