# Supplementary material for: Early-Onset Colorectal Cancers Exhibit Distinctive Placental-Like Features
Source: Research Square preprint supplement (doi:10.21203/rs.3.rs-7193450/v1), 2025-08-06
Supplement: Supplementary file 5 [file f86e7502aa3b9d27659cc4ae.xlsx]

## Sheet: Supp Table 3
Supplementary Table 3: Proteomic profiling of EO-CRC samples in the validation cohort reveals a distinct overexpression of a placenta-associated signature.

## Sheet: Analysis_1
EOCRC17.PG.Quantity	EOCRC18.PG.Quantity	EOCRC20.PG.Quantity	EOCRC21.PG.Quantity	EOCRC22.PG.Quantity	EOCRC23.PG.Quantity	EOCRC24.PG.Quantity	EOCRC25.PG.Quantity	EOCRC26.PG.Quantity	SOCRC8.PG.Quantity	SOCRC9.PG.Quantity	SOCRC10.PG.Quantity	SOCRC11.PG.Quantity	SOCRC12.PG.Quantity	SOCRC13.PG.Quantity	SOCRC14.PG.Quantity	SOCRC15.PG.Quantity	SOCRC16.PG.Quantity	SOCRC17.PG.Quantity	C: Tissue specificity	N: -Log Student's T-test p-value EOCRC_SOCRC	N: Student's T-test q-value EOCRC_SOCRC	N: Student's T-test Difference EOCRC_SOCRC	Signficantly deregulated EOCRC_SOCRC	N: Student's T-test Test statistic EOCRC_SOCRC	T: PG.ProteinGroups	T: PG.NrOfPrecursorsIdentified	T: PG.ProteinDescriptions	T: PG.Genes
19.7484	18.5911	21.0845	20.0584	21.202	19.725	20.2093	20.9043	19.6537	18.9539	20.608	21.316	20.6532	18.9843	21.0626	19.773	19.8761	20.4047	19.3613	TISSUE SPECIFICITY: Plasma.	0.0288169	0.96269	0.0314251		0.0817502	P04217	23	Alpha-1B-glycoprotein	A1BG
14.8247	16.0916	15.6845	15.5408	12.8671	15.1156	14.5656	13.5761	15.4843	15.7947	15.6249	14.7912	12.0997	14.4651	17.3402	15.4798	15.7926	15.2773	14.9195	TISSUE SPECIFICITY: Widely expressed with highest levels in brain, liver, pancreas, colon and spleen. {ECO:0000269|PubMed:10669759}.	0.222791	0.758338	-0.297341		-0.5363	Q9NQ94;Q9NQ94-2	12	APOBEC1 complementation factor;Isoform 2 of APOBEC1 complementation factor	A1CF
18.0131	18.8481	20.7196	19.933	19.6946	19.2816	18.7371	20.2548	18.3735	19.4092	20.1711	21.0278	19.9723	18.4747	20.1552	20.043	19.2608	21.0185	18.0414	TISSUE SPECIFICITY: Secreted in plasma. {ECO:0000269|PubMed:6203908}.	0.489133	0.534632	-0.440135		-1.0152	P01023	105	Alpha-2-macroglobulin	A2M
16.1483	17.1021	16.2616	16.9977	16.075	16.498	16.9217	13.9817	18.0742	16.8703	15.623	15.1215	16.6897	16.0566	14.1962	15.7236	16.1632	15.5136	17.0148	NA;TISSUE SPECIFICITY: Widely expressed (PubMed:11159947, PubMed:16022285). Particularly abundant in cerebellum, corpus callosum, adrenal gland, pituitary gland, gastrointestinal structures and fetal lung (PubMed:11159947). {ECO:0000269|PubMed:11159947, ECO:0000269|PubMed:16022285}.	0.620978	0.445348	0.553903		1.2194	F8VZ44;Q9NRG9;Q9NRG9-2	9	Aladin;Aladin;Isoform 2 of Aladin	AAAS
15.4692	17.7013	16.6638	18.21	15.2513	17.807	16.9432	14.8106	17.4356	16.7408	16.5637	15.0238	16.3136	12.6393	15.8256	16.6466	16.5799	16.1541	16.873	TISSUE SPECIFICITY: Highly expressed in kidney, heart and brain, but low in liver. {ECO:0000269|PubMed:12623130}.	0.68756	0.404647	0.763084		1.31698	Q86V21	20	Acetoacetyl-CoA synthetase	AACS
12.6286	12.0725	11.5302	13.233	12.2855	13.4024	13.8671	12.3949	13.6995	13.5352	13.8743	11.7662	13.0533	8.48332	11.8709	12.9021	14.3448	13.6317	13.9373	TISSUE SPECIFICITY: Higher expression in the liver. Also found in heart, brain, kidney, pancreas, prostate, testis and ovary.	0.0283277	0.963217	0.0505013		0.0804042	Q8N5Z0;Q8N5Z0-2	4	Kynurenine/alpha-aminoadipate aminotransferase, mitochondrial;Isoform 2 of Kynurenine/alpha-aminoadipate aminotransferase, mitochondrial	AADAT
15.3906	15.9524	12.0495	15.457	16.1425	15.3161	17.4864	15.5598	17.4433	14.9933	14.1952	14.6723	13.6836	15.2292	13.3486	14.1109	13.6243	12.8995	15.3674	NA	1.63953	0.108428	1.43175	+	2.50031	A0A096LP25	10	AP2-associated protein kinase 1 (Fragment)	AAK1
18.4695	17.1261	17.3477	18.9637	17.5118	16.4658	16.7812	18.2114	16.1996	17.1625	18.3768	18.2501	16.7375	17.9319	18.597	17.1439	16.4879	16.8443	17.9227	NA	0.0889676	0.901261	-0.0924846		-0.237949	E9PNP3;Q9H7C9	8	Mth938 domain-containing protein	AAMDC
15.9472	16.6785	15.9193	15.8852	15.4855	15.7545	15.9609	15.2153	16.9305	14.8627	13.6713	15.5288	14.588	13.7549	11.9243	15.4496	15.8505	14.4956	15.0705	NA;TISSUE SPECIFICITY: Expressed in metastatic melanoma, liver, skin, kidney, heart, lung, lymph node, skeletal muscle and brain, and also in A2058 melanoma cells and activated T-cells (at protein level). Expressed in blood vessels. Strongly expressed in endothelial cells, cytotrophoblasts, and poorly differentiated. colon adenocarcinoma cells found in lymphatics. {ECO:0000269|PubMed:10329261, EC…	2.50637	0.0366581	1.45558	+	3.44131	C9JEH3;C9JG97;Q13685	7	Angio-associated migratory cell protein	AAMP
14.3269	15.5109	14.3229	18.5404	13.6987	15.0511	13.7061	14.5663	13.9486	15.4742	10.7821	16.0445	12.5676	14.2113	14.8142	14.3862	14.2928	13.3031	16.9958	NA	0.330518	0.661414	0.565267		0.743761	Q9Y312	6	Protein AAR2 homolog	AAR2
18.788	19.5747	19.217	19.6755	18.7792	19.2704	19.0764	19.081	19.0905	19.7524	19.8397	19.6548	19.2957	19.5455	19.4182	19.3011	19.0894	19.3695	19.3728	NA	1.5094	0.129304	-0.29138		-2.35264	P49588;P49588-2	43	Alanine--tRNA ligase, cytoplasmic;Isoform 2 of Alanine--tRNA ligase, cytoplasmic	AARS1
17.8953	17.4714	17.1811	17.8692	17.528	18.3934	18.8049	15.6807	18.6679	16.7456	17.9084	17.258	16.8124	17.2308	17.7626	16.9107	17.3075	16.3956	16.9285	NA	1.02687	0.247742	0.595339		1.77385	Q5JTZ9	16	Alanine--tRNA ligase, mitochondrial	AARS2
14.9388	16.4042	15.0201	13.3394	15.4159	15.4321	12.1783	16.1056	13.3677	15.2959	14.8192	14.6207	15.1507	14.398	15.2935	15.1116	16.3647	14.7814	16.822	NA	0.555554	0.487159	-0.576645		-1.12008	Q9BTE6	12	Alanyl-tRNA editing protein Aarsd1	AARSD1
15.4787	13.7811	14.9314	16.2772	14.7877	13.7055	13.2208	14.7812	15.2823	13.9311	15.3959	14.5817	14.5923	15.2537	14.5749	14.0493	14.1177	13.6538	11.5522	TISSUE SPECIFICITY: Expressed in all 16 tissues examined with highest expression in the liver.	0.54952	0.491007	0.523744		1.11073	Q9UDR5	14	Alpha-aminoadipic semialdehyde synthase, mitochondrial	AASS
13.2796	13.4248	13.8402	12.1399	11.516	13.9687	12.67	12.2947	13.5156	14.5594	13.3803	14.0088	14.133	15.6596	16.0506	10.9679	13.541	11.2039	13.6173	TISSUE SPECIFICITY: Ubiquitously expressed. Expressed at high levels in brain, heart, kidney, placenta and thymus. {ECO:0000269|PubMed:10783144, ECO:0000269|PubMed:11027528}.	0.629636	0.438978	-0.751108		-1.23227	Q9NY61	9	Protein AATF	AATF
14.639	15.3631	15.2427	14.2861	18.253	15.2814	17.4984	14.6262	15.8548	14.4564	16.5464	16.3608	15.5349	16.687	16.7011	15.3344	14.7321	15.0761	14.9862	NA;TISSUE SPECIFICITY: Liver > pancreas > brain > kidney > heart > placenta.	0.0205059	0.973631	0.0301031		0.0586934	H3BRN4;P80404	17	4-aminobutyrate aminotransferase, mitochondrial;4-aminobutyrate aminotransferase, mitochondrial	ABAT
11.7431	12.6975	14.073	12.4911	15.2883	11.1069	15.2664	11.6688	15.6051	11.5998	12.4483	12.3404	12.6754	11.3049	11.4147	13.8945	11.3785	11.5749	12.4908	TISSUE SPECIFICITY: Widely expressed, but most abundant in macrophages.	NaN	1	0		NaN	O95477	6	Phospholipid-transporting ATPase ABCA1	ABCA1
12.3301	12.9588	13.6832	11.7897	12.5812	9.53343	10.3931	13.049	14.1996	12.7696	13.2953	13.1778	12.252	11.6914	14.3126	10.9744	8.59696	12.1097	12.6074	TISSUE SPECIFICITY: Widely expressed with higher expression in liver. {ECO:0000269|PubMed:11478798, ECO:0000269|Ref.2}.	0.0517567	0.93679	0.101076		0.143409	Q8N139	5	ATP-binding cassette sub-family A member 6	ABCA6
11.6592	12.7517	17.6763	13.1901	17.6531	16.476	13.4833	15.637	13.5954	15.5667	16.1027	17.7484	15.9099	16.4707	17.3228	14.6952	13.6459	14.1006	16.5641	TISSUE SPECIFICITY: Widely expressed with higher expression in heart, skeletal muscle and liver (PubMed:12379217, PubMed:28882873, PubMed:29300488). Highly expressed in the superior frontal white matter and inferior temporal white matter (PubMed:12379217). {ECO:0000269|PubMed:12379217, ECO:0000269|PubMed:28882873, ECO:0000269|PubMed:29300488}.	0.718932	0.387557	-1.13248		-1.36187	O94911-3	22	Isoform 3 of ATP-binding cassette sub-family A member 8	ABCA8
14.5956	13.852	14.4276	15.9305	14.6038	14.0418	16.1467	15.5345	16.8605	15.317	15.2315	13.5906	14.3326	14.9157	16.1357	14.0063	14.8987	14.8332	17.7882	TISSUE SPECIFICITY: Expressed in liver, kidney, small intestine and brain.	0.00358226	0.995099	0.00537033		0.010448	P08183	29	ATP-dependent translocase ABCB1	ABCB1
15.4847	15.5491	15.2112	14.3519	14.1614	16.5552	15.5198	14.1518	16.5058	16.1563	14.9393	16.4016	16.0087	17.0678	17.0956	14.7092	15.2607	15.7204	13.4945	TISSUE SPECIFICITY: Ubiquitous. Highly expressed in bone marrow, expressed at intermediate to high levels in skeletal muscle, small intestine, thyroid, heart, brain, placenta, liver, pancreas, prostate, testis, ovary, leukocyte, stomach, spinal cord, lymph node, trachea and adrenal gland, and low levels are found in lung, kidney, spleen, thymus and colon.	0.399659	0.6039	-0.408645		-0.866239	Q9NRK6	9	ATP-binding cassette sub-family B member 10, mitochondrial	ABCB10
12.7096	14.9652	14.328	13.2755	15.4401	12.4348	15.9496	12.7399	17.5157	13.704	12.0063	13.252	12.949	12.1838	11.9641	13.5422	14.0843	13.7292	17.995	TISSUE SPECIFICITY: Widely expressed. High expression is detected in the retinal epithelium (PubMed:10837493, PubMed:22226084). Expressed in mature erythrocytes (PubMed:22655043). {ECO:0000269|PubMed:10837493, ECO:0000269|PubMed:22226084, ECO:0000269|PubMed:22655043}.	0.504557	0.525196	0.83216		1.03995	Q9NP58;Q9NP58-4	8	ATP-binding cassette sub-family B member 6, mitochondrial;Isoform 2 of ATP-binding cassette sub-family B member 6, mitochondrial	ABCB6
16.4434	15.4615	16.2444	17.2736	16.1836	15.851	16.0254	15.1192	16.6681	15.6453	16.0933	17.1538	15.92	16.6191	16.3153	16.3324	16.2376	15.8895	16.9681	NA	0.298886	0.689857	-0.176296		-0.685167	A0A5F9ZA98;B4DGL8;O75027;O75027-2	13	ATP-binding cassette sub-family B member 7, mitochondrial;ATP-binding cassette sub-family B member 7, mitochondrial (Fragment);ATP-binding cassette sub-family B member 7, mitochondrial;Isoform 2 of ATP-binding cassette sub-family B member 7, mitochondrial	ABCB7
16.1852	16.8377	14.4479	16.7319	15.9315	16.5539	17.0038	14.2887	17.768	15.67	15.9175	15.5262	15.0635	16.4505	15.1301	14.6612	15.662	15.9099	17.3607	TISSUE SPECIFICITY: Ubiquitous.	0.499235	0.528093	0.459142		1.03144	Q9NUT2;Q9NUT2-2;Q9NUT2-3;Q9NUT2-4;Q9NUT2-5	9	Mitochondrial potassium channel ATP-binding subunit;Isoform 2 of Mitochondrial potassium channel ATP-binding subunit;Isoform 3 of Mitochondrial potassium channel ATP-binding subunit;Isoform 4 of Mitochondrial potassium channel ATP-binding subunit;Isoform 5 of Mitochondrial potassium channel ATP-binding subunit	ABCB8
16.7608	17.2727	17.1049	18.3904	18.0282	17.5089	18.3951	16.9612	18.8141	16.4226	16.5345	18.73	15.4004	16.1186	15.1976	17.0963	17.0053	17.0709	16.6181	NA;TISSUE SPECIFICITY: Lung, testis and peripheral blood mononuclear cells.	1.77956	0.0888993	1.07347	+	2.65656	I3L4X2;P33527;P33527-9	31	Multidrug resistance-associated protein 1 (Fragment);Multidrug resistance-associated protein 1;Isoform 9 of Multidrug resistance-associated protein 1	ABCC1
15.4155	16.787	16.4748	16.8325	13.147	16.2597	12.4307	11.2094	16.1185	16.5375	17.6946	14.4334	15.5277	16.7548	16.761	15.9116	16.7128	17.7597	15.0371	TISSUE SPECIFICITY: Expressed in testis (at protein level). Widely expressed at low level (PubMed:11483364, PubMed:11688999, PubMed:12011458, PubMed:17472575). Isoform 5 is specifically expressed in brain, testis and breast cancer cells (PubMed:11483364, PubMed:11688999, PubMed:12011458). {ECO:0000269|PubMed:11483364, ECO:0000269|PubMed:11688999, ECO:0000269|PubMed:12011458, ECO:0000269|PubMed:17…	1.02546	0.248203	-1.34913		-1.77206	Q96J65;Q96J65-2;Q96J65-5	3	Multidrug resistance-associated protein 9;Isoform 2 of Multidrug resistance-associated protein 9;Isoform 5 of Multidrug resistance-associated protein 9	ABCC12
16.2917	16.8821	16.6635	17.1694	17.0169	16.5159	17.033	16.6119	18.2454	15.5986	16.2023	16.1183	16.148	16.3342	16.1039	14.9761	16.0902	15.8167	13.5036	TISSUE SPECIFICITY: Widely expressed, with particularly high levels in prostate, but is barely detectable in liver. sinusoidal membrane of hepatocytes.	2.72708	0.0283254	1.24744	+	3.67558	O15439	21	Multidrug resistance-associated protein 4	ABCC4
16.2126	12.4247	16.6931	13.2037	11.9139	15.2656	13.6038	15.7151	13.5908	15.5961	13.6987	18.8869	16.7548	18.0449	18.0761	11.8283	16.4852	13.9859	11.5553	NA	0.584698	0.467669	-1.19975		-1.16477	A0A2R8Y3M7;A0A2R8Y4Z4;A0A2R8Y5D8;A0A2R8Y5I7;A0A2R8Y5X1;A0A2R8Y698;A0A2R8Y6B7;A0A2R8Y6I7;A0A2R8Y781;A0A2R8YCG4;A0A2R8YD94;A0A2R8YDB5;A0A2R8YDG0;A0A2R8YDG6;A0A2R8YDX3;A0A2R8YEE5	1	ATP-binding cassette sub-family C member 8 (Fragment);ATP-binding cassette sub-family C member 8;ATP-binding cassette sub-family C member 8;ATP-binding cassette sub-family C member 8;ATP-binding cassette sub-family C member 8 (Fragment);ATP-binding cassette sub-family C member 8;ATP-binding cassette sub-family C member 8 (Fragment);ATP-binding cassette sub-family C member 8;ATP-binding cassette s…	ABCC8
14.4363	13.3629	11.2949	12.2609	16.3742	14.7812	17.2773	13.9131	17.3516	13.4675	13.0217	13.0174	10.9072	13.8545	12.6589	13.7943	13.6304	13.7245	12.345	NA	1.26039	0.181245	1.51924		2.06135	P33897	4	ATP-binding cassette sub-family D member 1	ABCD1
16.6356	16.3698	15.9541	15.8086	16.0874	17.2162	16.7858	13.8408	17.7754	15.4241	15.7031	14.9963	14.9719	15.4965	15.1501	16.8434	16.2665	16.7175	16.1909	NA	0.602493	0.456279	0.498838		1.1917	A0A3B3ITW3;P28288	29	ATP-binding cassette sub-family D member 3	ABCD3
15.1019	13.7876	15.4103	12.6161	14.9591	15.2626	17.451	14.8872	17.4973	10.8257	11.7885	12.6623	15.3611	14.4354	13.5361	13.7171	15.7092	14.855	15.735	TISSUE SPECIFICITY: Ubiquitous.	1.06266	0.235367	1.35669		1.81904	O14678	7	Lysosomal cobalamin transporter ABCD4	ABCD4
18.5282	19.7346	18.3126	20.2937	18.8062	19.4954	20.0355	18.7723	20.1131	19.7638	18.8019	18.7278	19.3868	19.1034	19.0777	18.9746	18.809	18.3902	18.4862	NA	0.769597	0.361181	0.391356		1.43304	P61221	27	ATP-binding cassette sub-family E member 1	ABCE1
17.624	18.354	16.9316	19.5946	17.4126	17.8484	18.0012	17.854	18.8182	18.0709	17.271	17.6257	17.5682	17.6585	17.4733	17.8541	17.589	17.2048	18.7133	TISSUE SPECIFICITY: Ubiquitous. {ECO:0000269|PubMed:9790762}.	0.607728	0.453505	0.345863		1.19957	Q8NE71;Q8NE71-2	25	ATP-binding cassette sub-family F member 1;Isoform 2 of ATP-binding cassette sub-family F member 1	ABCF1
16.4914	17.5124	15.6542	17.9074	16.016	16.5836	18.0348	15.9497	17.409	17.4769	15.8622	16.4812	16.5671	16.9976	16.1453	16.6894	16.0597	16.1234	17.1923	NA	0.384687	0.614076	0.280349		0.840316	Q9UG63;Q9UG63-2	27	ATP-binding cassette sub-family F member 2;Isoform 2 of ATP-binding cassette sub-family F member 2	ABCF2
16.4406	16.9964	15.9318	17.8034	16.0481	15.8578	16.8303	16.0847	16.388	17.198	16.0217	14.968	16.3589	16.2346	16.244	16.1852	15.7956	15.8106	16.6913	NA	0.609657	0.452713	0.336		1.20247	Q9NUQ8;Q9NUQ8-2	21	ATP-binding cassette sub-family F member 3;Isoform 2 of ATP-binding cassette sub-family F member 3	ABCF3
11.835	13.5069	11.7711	11.9212	11.4096	12.6563	12.848	12.0994	13.4454	12.8776	12.7211	11.8987	12.6817	12.4651	12.7544	12.4774	12.3741	12.2034	13.2663	expression is increased in macrophages from patients with Tangier disease. {ECO:0000269|PubMed:11350058}.;TISSUE SPECIFICITY: Expressed in several tissues. Expressed in macrophages	0.296061	0.691582	-0.183863		-0.679848	P45844;P45844-2;P45844-3;P45844-4;P45844-5;P45844-6;P45844-7	2	ATP-binding cassette sub-family G member 1;Isoform 2 of ATP-binding cassette sub-family G member 1;Isoform 3 of ATP-binding cassette sub-family G member 1;Isoform 4 of ATP-binding cassette sub-family G member 1;Isoform 5 of ATP-binding cassette sub-family G member 1;Isoform 6 of ATP-binding cassette sub-family G member 1;Isoform 7 of ATP-binding cassette sub-family G member 1	ABCG1
18.4823	17.5491	18.4666	19.2546	16.7023	18.3076	18.8056	17.9792	19.5452	18.1479	17.7947	17.5922	17.3071	17.7889	18.1099	18.274	18.4434	18.0444	18.6864	NA	0.52019	0.513705	0.32472		1.06479	Q9NUJ1	16	Mycophenolic acid acyl-glucuronide esterase, mitochondrial	ABHD10
18.0627	17.4551	19.05	18.4756	15.3169	18.114	18.0511	16.8255	17.3163	16.7224	18.2736	16.8399	17.6963	18.4279	17.8906	18.1507	18.5529	18.7007	20.3611	TISSUE SPECIFICITY: Ubiquitously expressed. {ECO:0000269|PubMed:12073013}.	0.540767	0.498438	-0.531931		-1.0971	Q8NFV4	24	Protein ABHD11	ABHD11
16.6989	17.6924	16.628	17.4481	16.9521	17.8384	17.9182	17.5955	19.0375	17.0199	16.5736	16.9744	16.5152	17.4334	17.6398	16.7439	16.521	17.0251	19.2347	NA	0.491071	0.533941	0.366243		1.01833	Q8N2K0;Q8N2K0-2	18	Lysophosphatidylserine lipase ABHD12;Isoform 2 of Lysophosphatidylserine lipase ABHD12	ABHD12
15.1068	17.0492	13.4717	16.5159	16.711	17.4258	17.4548	14.8972	18.5027	13.4363	12.9906	11.8328	12.6483	14.0506	12.4421	15.8554	15.0779	14.9613	18.4724	NA	1.75111	0.0923893	2.17155	+	2.62501	Q7L211	3	Protein ABHD13	ABHD13
18.6657	18.4187	19.7365	22.0485	18.2171	17.8455	19.624	18.9099	19.5751	18.262	19.5356	18.833	18.2497	18.6351	18.8836	19.3679	19.1729	19.6101	19.9051	TISSUE SPECIFICITY: Ubiquitous. Detected in spleen, thymus, prostate, testis, ovary, small intestine, colon, peripheral blood leukocyte, heart, placenta, lung, liver, skeletal muscle, pancreas and kidney. {ECO:0000269|PubMed:14672934}.	0.165137	0.814372	0.181272		0.414493	Q96IU4	10	Protein ABHD14B	ABHD14B
16.8439	17.4233	16.5934	17.865	16.7656	16.7665	18.3728	16.2793	19.068	14.4124	16.4917	15.6568	15.6526	16.7436	16.4675	16.741	16.8128	16.737	17.972	NA	1.40407	0.146467	0.962115	+	2.23099	A0A0G2JJD3;O95870	21	HLA-B associated transcript 5, isoform CRA_b;Phosphatidylserine lipase ABHD16A	ABHD16A
15.1894	15.511	15.267	16.4354	15.6243	16.2949	16.4326	14.2348	17.4976	12.7065	11.8062	12.8832	20.4031	20.77	12.7533	14.1846	14.7921	14.9252	19.4411	NA	0.118394	0.86576	0.365349		0.308583	Q5VST6;Q5VST6-2	6	Alpha/beta hydrolase domain-containing protein 17B;Isoform 2 of Alpha/beta hydrolase domain-containing protein 17B	ABHD17B
15.5745	13.5921	14.5994	13.6388	15.5574	15.1625	15.867	12.144	16.2061	13.7113	12.4729	12.2532	11.7059	12.1022	13.75	13.3681	13.0252	15.3178	15.061	NA	1.58458	0.117324	1.42787	+	2.43827	Q8WU67	6	Phospholipase ABHD3	ABHD3
13.8333	16.1991	14.0888	15.5577	14.2827	14.8404	16.1845	14.4976	16.6365	14.803	14.2682	14.3696	14.7537	14.7905	16.7484	15.0968	14.8219	15.0289	15.4957	NA	0.100059	0.886356	0.106839		0.264968	Q9BV23	7	Monoacylglycerol lipase ABHD6	ABHD6
18.4388	18.5876	17.7775	18.2981	18.6744	18.2441	19.6735	18.4368	18.6113	18.17	18.5683	17.9739	18.2146	18.5972	17.6713	17.0155	18.0462	17.62	19.6106	NA;TISSUE SPECIFICITY: Widely expressed, with highest expression in brain. {ECO:0000269|PubMed:11418237}.	0.70381	0.395919	0.378121		1.34031	A0A0A0MRT6;Q8IZP0;Q8IZP0-12;Q8IZP0-2;Q8IZP0-3;Q8IZP0-4;Q8IZP0-5;Q8IZP0-6;Q8IZP0-9	18	Abl interactor 1;Abl interactor 1;Isoform 12 of Abl interactor 1;Isoform 2 of Abl interactor 1;Isoform 3 of Abl interactor 1;Isoform 4 of Abl interactor 1;Isoform 5 of Abl interactor 1;Isoform 6 of Abl interactor 1;Isoform 9 of Abl interactor 1	ABI1
16.3457	16.3225	11.9248	11.7533	15.077	14.2611	15.117	15.9435	13.3123	13.711	12.6909	12.9309	13.6677	13.1704	13.3375	12.5127	14.4931	12.8367	13.0927	NA;TISSUE SPECIFICITY: Widely expressed. Abundant in testes, ovary, thymus, and colon, with lower but detectable levels in prostate, peripheral blood leukocytes, and spleen. {ECO:0000269|PubMed:7590236}.	1.24008	0.186146	1.20643		2.03697	A0A0C4DG21;E7EP65;E7EW77;F8WAL6;Q9NYB9;Q9NYB9-2;Q9NYB9-4	3	Abl interactor 2;Abl interactor 2 (Fragment);Abl interactor 2;Abl interactor 2;Abl interactor 2;Isoform 2 of Abl interactor 2;Isoform 4 of Abl interactor 2	ABI2
15.2621	14.7449	16.0921	15.7817	17.0214	15.8446	17.4959	16.6824	17.9676	14.5691	14.8635	15.6549	14.4631	15.249	14.2082	13.9141	14.054	15.0888	16.0544	TISSUE SPECIFICITY: Expressed in heart, lung, liver, pancreas, kidney, placenta and at low levels in brain and skeletal muscle. {ECO:0000269|PubMed:10978530}.	2.75852	0.0279431	1.50949	+	3.70891	Q9P2A4	8	ABI gene family member 3	ABI3
17.5272	15.9164	18.2048	12.9486	17.1141	16.7155	16.5634	18.24	15.1294	16.4931	17.1764	18.5073	17.545	17.6243	17.9594	14.2648	14.5093	13.913	12.2207	NA;TISSUE SPECIFICITY: Expressed in brain, heart, lung, liver, pancreas kidney and placenta. {ECO:0000269|PubMed:11501947}.	0.216774	0.764466	0.46307		0.523988	H7C556;Q7Z7G0	24	Target of Nesh-SH3	ABI3BP
17.0861	17.0171	14.8901	16.4665	15.6269	16.3993	16.5268	15.5466	17.231	16.7287	16.8948	16.1586	10.2913	15.9931	18.265	15.5102	14.828	14.4296	15.3494	TISSUE SPECIFICITY: Widely expressed.	0.574885	0.475028	0.865178		1.14981	P00519;P00519-2	12	Tyrosine-protein kinase ABL1;Isoform IB of Tyrosine-protein kinase ABL1	ABL1
16.5123	16.3113	15.2173	17.036	16.2764	15.9893	16.466	15.6016	16.237	15.3955	15.4379	15.7453	15.4849	15.31	15.5628	15.9749	15.1298	15.4459	17.2349	TISSUE SPECIFICITY: Detected in liver, heart, skeletal muscle, brain and retina, where it is concentrated in the inner segment and in the outer plexiform layers. {ECO:0000269|PubMed:9245787}.	1.17997	0.202265	0.51083		1.96418	O14639-2	31	Isoform 2 of Actin-binding LIM protein 1	ABLIM1
13.6672	13.2775	13.3855	13.6183	12.1415	14.5039	14.7549	13.5328	13.6782	14.4149	14.279	12.8741	12.6846	12.8189	13.092	14.0815	12.5726	12.7563	14.4467	NA;TISSUE SPECIFICITY: Highly expressed in skeletal muscle. {ECO:0000269|PubMed:17194709}.	0.258856	0.726591	0.2157		0.608361	F5GYR0;Q6H8Q1;Q6H8Q1-2;Q6H8Q1-3;Q6H8Q1-5;Q6H8Q1-6;Q6H8Q1-7;Q6H8Q1-8;Q6H8Q1-9	6	Actin-binding LIM protein 2;Actin-binding LIM protein 2;Isoform 2 of Actin-binding LIM protein 2;Isoform 3 of Actin-binding LIM protein 2;Isoform 5 of Actin-binding LIM protein 2;Isoform 6 of Actin-binding LIM protein 2;Isoform 7 of Actin-binding LIM protein 2;Isoform 8 of Actin-binding LIM protein 2;Isoform 9 of Actin-binding LIM protein 2	ABLIM2
11.5939	12.186	11.7789	12.6515	11.7265	12.5704	12.2563	10.6895	12.9695	12.8532	11.4763	14.2087	11.4614	11.2918	12.0868	8.40212	11.3112	11.0634	11.5546	NA;TISSUE SPECIFICITY: Expressed predominantly in heart and brain. {ECO:0000269|PubMed:17194709}.	0.412664	0.59289	0.475983		0.88851	A0A0C4DGA7;O94929;O94929-3	6	Actin-binding LIM protein 3;Actin-binding LIM protein 3;Isoform 3 of Actin-binding LIM protein 3	ABLIM3
15.5647	15.8841	16.1036	15.5013	14.701	15.1704	15.8578	16.0925	13.4549	16.3414	16.2282	15.6448	16.1319	16.1705	16.5927	15.5919	16.0791	15.6889	16.5993	NA;TISSUE SPECIFICITY: Highly enriched in the brain. Much weaker expression in heart, lung and muscle.	1.64175	0.107949	-0.736843	+	-2.5028	A0A0G2JQ41;A0A1C7CYZ0;Q12979;Q12979-2;Q12979-4	20	Active breakpoint cluster region-related protein (Fragment);Active breakpoint cluster region-related protein;Active breakpoint cluster region-related protein;Isoform Short of Active breakpoint cluster region-related protein;Isoform 4 of Active breakpoint cluster region-related protein	ABR
18.3344	20.167	15.7837	18.5924	12.234	17.4546	13.352	15.8943	14.3447	19.0921	15.9049	15.3179	15.8274	17.2992	17.1173	17.9544	16.2902	15.8897	17.914	NA	0.29314	0.694628	-0.621027		-0.674333	Q9P1F3	8	Costars family protein ABRACL	ABRACL
12.0892	11.8506	12.0558	12.237	11.9495	11.0732	15.6979	12.3697	16.3223	12.7906	13.3371	12.2194	12.8	15.0378	12.3429	11.7531	12.5862	12.5994	12.5191	NA	NaN	1	0		NaN	D6REL5;Q6UWZ7;Q6UWZ7-2	4	BRCA1-A complex subunit Abraxas 1;BRCA1-A complex subunit Abraxas 1;Isoform 2 of BRCA1-A complex subunit Abraxas 1	ABRAXAS1
16.0219	16.3314	15.4312	16.052	15.8888	16.2605	17.0787	16.0454	17.3795	16.2536	16.1143	16.4485	15.7261	16.1255	16.5735	15.7779	15.1236	15.5653	15.6753	TISSUE SPECIFICITY: Detected in heart muscle (at protein level). Detected in heart and muscle, and at much lower levels in brain (PubMed:21195082). {ECO:0000269|PubMed:21195082}.	0.749336	0.371017	0.338249		1.40476	Q15018	17	BRISC complex subunit Abraxas 2	ABRAXAS2
13.4495	12.8559	12.3877	18.5713	12.1395	11.9115	12.2428	13.4493	14.9262	13.9572	11.2874	12.5103	13.1493	12.1131	11.6935	14.2221	14.4556	10.8706	11.9992	NA	0.590845	0.464044	0.922363		1.1741	Q9ULW3	3	Activator of basal transcription 1	ABT1
17.822	17.6941	17.8046	19.7501	17.1743	17.6851	17.4364	17.634	17.6451	18.8516	19.2185	17.7365	17.8059	18.5041	18.3593	17.3757	17.8668	17.8479	19.8045	NA	0.752859	0.369054	-0.487542		-1.4097	P09110	16	3-ketoacyl-CoA thiolase, peroxisomal	ACAA1
20.4694	20.0181	19.8689	22.1318	19.7191	20.6478	21.106	19.3192	21.1511	20.8652	20.3896	19.9415	20.0361	21.0188	20.4825	19.4807	22.2881	21.1916	23.9662	NA	0.427903	0.581679	-0.473652		-0.914324	A0A0B4J2A4;P42765	40	3-ketoacyl-CoA thiolase, mitochondrial;3-ketoacyl-CoA thiolase, mitochondrial	ACAA2
14.8812	17.2835	15.3987	17.37	15.3443	16.5566	15.967	15.0038	16.7679	15.7446	15.0854	15.4253	15.484	14.7763	15.5002	16.002	16.2084	15.3888	16.9262	expressed at low level in pulmonary tissue;not detected in the liver.;TISSUE SPECIFICITY: Expressed in brain, placenta, skeletal muscle, renal, pancreatic and adipose tissues	0.556129	0.486822	0.409533		1.12097	Q13085;Q13085-2;Q13085-3;Q13085-4	54	Acetyl-CoA carboxylase 1;Isoform 2 of Acetyl-CoA carboxylase 1;Isoform 3 of Acetyl-CoA carboxylase 1;Isoform 4 of Acetyl-CoA carboxylase 1	ACACA
11.4138	12.5287	12.851	12.8587	12.5769	11.3827	13.855	13.0031	14.2153	12.2362	17.7094	13.2846	12.2792	19.1956	14.2962	12.1839	10.9124	11.5367	11.9556	TISSUE SPECIFICITY: Widely expressed with highest levels in heart, skeletal muscle, liver, adipose tissue, mammary gland, adrenal gland and colon (PubMed:9099716). Isoform 3 is expressed in skeletal muscle, adipose tissue and liver (at protein level) (PubMed:19190759). Isoform 3 is detected at high levels in adipose tissue with lower levels in heart, liver, skeletal muscle and testis (PubMed:1919…	NaN	1	0		NaN	O00763;O00763-2;O00763-3	3	Acetyl-CoA carboxylase 2;Isoform 2 of Acetyl-CoA carboxylase 2;Isoform 3 of Acetyl-CoA carboxylase 2	ACACB
14.1533	12.2266	13.6063	16.2999	13.8821	16.139	16.1057	13.6814	16.4985	15.2541	14.097	13.7338	14.5574	16.0691	15.2272	13.8721	15.2058	14.3549	16.8107	TISSUE SPECIFICITY: Widely expressed with highest expression in fetal brain, followed by heart, muscle, kidney and adult brain. Expression levels varying from isoform to isoform. {ECO:0000269|PubMed:15560374, ECO:0000269|PubMed:21237683}.	0.121159	0.862789	-0.185668		-0.315054	Q6JQN1	12	Acyl-CoA dehydrogenase family member 10	ACAD10
16.2973	15.8751	17.4674	19.6258	17.3819	16.7715	18.2595	15.5509	18.7738	16.4899	16.8767	16.8561	16.0021	16.2871	16.5478	16.5147	17.3996	17.3055	18.708	TISSUE SPECIFICITY: Detected at comparable levels in all tissues examined (heart, lung, brain, skeletal muscle, pancreas and placenta). Weakly expressed in liver and kidney.	0.400802	0.602715	0.434935		0.868206	Q9UKU7	17	Isobutyryl-CoA dehydrogenase, mitochondrial	ACAD8
16.8237	15.9708	16.2886	17.6072	16.5398	16.8691	17.5135	16.0499	17.7561	16.6825	16.5867	16.2407	16.3482	17.4191	16.4728	15.8963	16.8076	16.3957	17.4223	TISSUE SPECIFICITY: Ubiquitously expressed in most normal human tissues and cancer cell lines with high level of expression in heart, skeletal muscles, brain, kidney and liver (PubMed:12359260). In the cerebellum uniquely expressed in the granular layer (at protein level) (PubMed:21237683). {ECO:0000269|PubMed:12359260, ECO:0000269|PubMed:21237683}.	0.325773	0.665011	0.197105		0.735082	Q9H845	33	Complex I assembly factor ACAD9, mitochondrial	ACAD9
19.2297	18.3357	20.3913	21.2183	17.8791	20.1089	19.3262	17.5564	19.1945	18.3844	19.8664	19.4187	19.1058	19.4176	19.7395	18.7456	19.2537	20.4112	22.3095	NA	0.357876	0.637222	-0.416347		-0.793088	P16219	15	Short-chain specific acyl-CoA dehydrogenase, mitochondrial	ACADS
18.2765	17.9221	18.9451	19.0669	19.6991	18.6245	18.4696	17.199	18.0016	18.1368	19.4883	18.2285	17.9614	19.0019	18.7097	17.6176	19.2948	18.4826	19.9888	TISSUE SPECIFICITY: Ubiquitously expressed. {ECO:0000269|PubMed:8660691}.	0.284585	0.702332	-0.223877		-0.658087	P45954	15	Short/branched chain specific acyl-CoA dehydrogenase, mitochondrial	ACADSB
19.2632	17.9342	19.505	20.0531	19.6272	20.0317	20.4072	18.5098	21.1325	19.1436	19.4196	19.2525	18.9245	19.3684	19.4341	18.9986	19.7584	19.7604	20.9259	NA	0.115283	0.868417	0.108501		0.301271	P49748;P49748-3	56	Very long-chain specific acyl-CoA dehydrogenase, mitochondrial;Isoform 3 of Very long-chain specific acyl-CoA dehydrogenase, mitochondrial	ACADVL
14.2056	15.1708	13.1456	14.1323	15.8999	15.2612	16.2102	15.9493	15.6024	16.9783	14.6785	13.345	15.7377	16.5517	14.3998	12.0537	14.6606	13.0903	12.5726	NA;TISSUE SPECIFICITY: Restricted to cartilages. {ECO:0000269|PubMed:7524681}.	0.493417	0.532618	0.657341		1.0221	A0A087X1T7;H0YMF1;P16112;P16112-2	13	Aggrecan core protein;Aggrecan core protein;Aggrecan core protein;Isoform 2 of Aggrecan core protein	ACAN
14.6696	15.3261	14.764	15.8173	15.717	15.59	15.7113	15.5368	16.0139	12.2624	10.2246	11.8332	17.6751	12.9799	16.7495	14.5007	13.395	15.0593	14.9786	TISSUE SPECIFICITY: Highest level in lung and spleen. Low level in heart, kidney, liver and pancreas. {ECO:0000269|PubMed:11062263}.	1.14932	0.208581	1.49483		1.92668	Q15027	7	Arf-GAP with coiled-coil, ANK repeat and PH domain-containing protein 1	ACAP1
15.1899	15.3931	15.3004	17.7152	15.1228	14.3519	16.2357	14.9724	16.18	15.7404	16.2374	15.7728	15.6529	15.4423	15.5697	15.1337	14.1528	15.0945	16.1611	TISSUE SPECIFICITY: Widely expressed. Highest level in lung. {ECO:0000269|PubMed:11062263}.	0.115203	0.868431	0.111037		0.301083	Q15057	22	Arf-GAP with coiled-coil, ANK repeat and PH domain-containing protein 2	ACAP2
19.4907	17.9005	20.2137	20.2353	18.9591	19.069	19.6017	18.5205	19.3121	19.8039	20.4465	20.1144	19.7374	19.7293	20.2911	19.0022	19.5881	19.7567	20.2937	NA	1.40992	0.145412	-0.620497	+	-2.2378	P24752	33	Acetyl-CoA acetyltransferase, mitochondrial	ACAT1
16.8773	18.0821	18.5264	20.3408	16.2136	18.2293	17.0507	17.5789	17.8801	19.0376	18.8043	18.0661	17.7635	17.8896	17.7488	18.726	17.4984	18.6206	18.8249	NA	0.504334	0.525113	-0.433627		-1.0396	Q9BWD1;Q9BWD1-2	15	Acetyl-CoA acetyltransferase, cytosolic;Isoform 2 of Acetyl-CoA acetyltransferase, cytosolic	ACAT2
17.373	18.6671	17.6597	17.4872	17.5592	17.9321	18.3925	17.4186	19.7718	17.292	17.6341	15.9779	16.6648	17.5907	16.2772	18.6835	17.3743	17.2029	17.3602	TISSUE SPECIFICITY: Ubiquitous, with highest expression in testis and ovary. {ECO:0000269|PubMed:11590181}.	1.46743	0.135614	0.82325	+	2.30441	Q9H3P7	20	Golgi resident protein GCP60	ACBD3
16.3105	16.7444	15.3704	16.8439	14.81	16.953	16.4699	14.2222	16.8994	15.1433	15.0721	14.8992	15.9085	15.8086	15.8879	16.2263	15.3381	16.0034	18.2132	NA	0.199402	0.781831	0.219242		0.487938	B7Z2R7;Q5T8D3-2;Q5T8D3-3	18	Acyl-CoA-binding domain-containing protein 5;Isoform 2 of Acyl-CoA-binding domain-containing protein 5;Isoform 3 of Acyl-CoA-binding domain-containing protein 5	ACBD5
12.0613	15.1615	12.1249	12.6594	12.562	11.9194	12.8558	14.2306	14.6034	12.1048	12.4618	14.7946	12.5341	14.3723	13.1987	12.7285	13.3718	13.0125	11.5638	TISSUE SPECIFICITY: Detected in placenta and spleen (at protein level). Detected in placenta, umbilical cord blood, CD34-positive hematopoietic progenitor cells and bone marrow. {ECO:0000269|PubMed:18268358}.	NaN	1	0		NaN	Q9BR61	4	Acyl-CoA-binding domain-containing protein 6	ACBD6
15.8226	15.4091	16.4045	19.378	17.8905	15.8466	16.8517	16.0857	17.6123	15.5598	16.0567	14.5137	15.1941	18.246	16.2464	15.7848	15.1875	17.6036	16.2247	NA;TISSUE SPECIFICITY: Ubiquitously expressed, with highest levels in lung, kidney, heart, gastrointestinal system and prostate. Isoform Testis-specific is expressed in spermatocytes and adult testis. {ECO:0000269|PubMed:10924499, ECO:0000269|PubMed:10969042, ECO:0000269|PubMed:12459472, ECO:0000269|PubMed:15671045}.	0.718475	0.387731	0.749497		1.36122	A0A0A0MSN4;P12821	15	Angiotensin-converting enzyme	ACE
16.4595	16.8591	15.9678	17.4322	16.4723	16.9379	17.366	16.4431	16.8582	16.7922	16.3292	16.345	16.0373	16.5015	16.4621	16.6406	17.0239	16.5601	17.2939	NA	0.371333	0.625232	0.156521		0.816926	S4R3H4	47	Apoptotic chromatin condensation inducer in the nucleus	ACIN1
18.2916	19.937	19.2315	20.268	19.318	19.65	19.6768	19.3312	19.8648	20.0713	20.3093	19.1493	19.762	19.5815	19.5781	19.7818	19.9598	19.6004	19.3246	NA	0.456211	0.558601	-0.20414		-0.961506	P53396	50	ATP-citrate synthase	ACLY
19.4848	19.0973	19.718	20.2978	19.3923	18.7603	19.436	19.0195	18.9843	19.2804	20.0979	19.8517	19.6543	19.0053	19.5923	19.5501	18.8789	19.7032	19.5477	NA	0.387246	0.612472	-0.161721		-0.844768	P21399	41	Cytoplasmic aconitate hydratase	ACO1
19.0192	18.0741	19.4471	18.8168	18.2562	18.3993	19.207	18.296	19.4308	18.8659	19.5054	19.6945	18.8337	19.2581	19.3868	18.6167	18.6224	18.9766	17.995	NA	0.393905	0.607199	-0.203647		-0.856313	A2A274;Q99798	70	Aconitate hydratase, mitochondrial;Aconitate hydratase, mitochondrial	ACO2
15.5662	15.1139	16.0967	16.2193	11.6453	15.7265	12.0486	14.1014	15.8948	15.0648	17.133	15.874	14.6413	15.3126	15.8912	16.1236	15.1298	16.0496	16.4874	TISSUE SPECIFICITY: Isoform 1 is predominantly expressed in skeletal muscle, liver, testis, stomach, spleen, lung and brain. Isoform 2 is predominantly expressed in kidney, uterus, hibernoma and white adipose tissue.	1.00984	0.25372	-1.05821		-1.75218	Q8WXI4-2	15	Isoform 2 of Acyl-coenzyme A thioesterase 11	ACOT11
17.3104	12.572	18.274	19.6204	17.89	17.5882	18.4981	18.0806	19.2469	16.4233	19.3227	19.4874	17.975	19.2959	17.9212	17.0431	18.4012	16.4273	17.9053	NA	0.185758	0.794225	-0.344604		-0.459082	Q9NPJ3	4	Acyl-coenzyme A thioesterase 13	ACOT13
18.5053	16.7008	17.9006	18.0242	18.5154	18.2561	18.8463	18.3663	19.8776	16.3411	18.037	19.0928	17.9451	18.2892	18.2785	17.5809	17.9747	17.4012	19.217	NA	0.377504	0.620765	0.316747		0.827767	A0A087X0W7	19	Acyl-coenzyme A thioesterase 2, mitochondrial	ACOT2
16.3496	16.7698	16.8571	19.5545	17.1069	17.2008	17.7304	16.9956	17.0752	17.4077	17.1092	17.7874	17.4253	17.3955	17.5615	16.4027	16.6929	17.1444	19.6121	TISSUE SPECIFICITY: Isoform 4 is expressed exclusively in brain. {ECO:0000269|PubMed:12435388}.	0.154859	0.825001	-0.160568		-0.391807	O00154;O00154-4;O00154-6;O00154-7	12	Cytosolic acyl coenzyme A thioester hydrolase;Isoform 4 of Cytosolic acyl coenzyme A thioester hydrolase;Isoform 6 of Cytosolic acyl coenzyme A thioester hydrolase;Isoform 7 of Cytosolic acyl coenzyme A thioester hydrolase	ACOT7
18.4774	18.3453	16.6192	18.775	15.4582	17.6798	18.7239	15.5551	19.2589	16.2505	16.1503	15.8942	15.3433	16.7842	15.6365	16.2702	17.9824	16.7368	18.0849	TISSUE SPECIFICITY: Detected in a T-cell line (at protein level). Ubiquitous (PubMed:9153233, PubMed:9299485). {ECO:0000269|PubMed:9153233, ECO:0000269|PubMed:9299485}.	1.28636	0.173074	1.14142		2.09237	O14734	10	Acyl-coenzyme A thioesterase 8	ACOT8
19.4653	17.8012	18.6781	19.21	19.486	19.0194	20.5863	19.09	21.0673	18.9484	18.7174	18.7914	18.5898	18.9612	19.5237	18.4347	18.7048	18.5756	18.7175	NA	1.05082	0.239491	0.581708		1.80414	Q9Y305	28	Acyl-coenzyme A thioesterase 9, mitochondrial	ACOT9
16.0184	18.0609	16.8427	17.33	16.1768	17.5079	17.3086	15.3077	18.1072	17.3393	16.6253	16.0509	16.2643	16.2064	16.7885	18.04	18.0554	17.4932	17.5554	TISSUE SPECIFICITY: Widely expressed with highest levels of isoform 1 and isoform 2 detected in testis. Isoform 1 is expressed at higher levels than isoform 2 in liver and kidney while isoform 2 levels are higher in brain, lung, muscle, white adipose tissue and testis. Levels are almost equal in heart. {ECO:0000269|PubMed:17603022, ECO:0000269|PubMed:20195242}.	0.0747856	0.913632	-0.0796274		-0.202655	Q15067	35	Peroxisomal acyl-coenzyme A oxidase 1	ACOX1
15.6482	15.057	15.0889	12.5906	15.6769	16.4708	16.896	14.3413	16.5082	13.4425	11.8109	12.3559	12.0274	15.3629	14.9887	15.4113	15.2595	14.4926	15.3366	NA;TISSUE SPECIFICITY: Present in all tissues tested: heart, brain, placenta, lung, liver, skeletal muscle, kidney and pancreas. Most abundant in heart, liver and kidney. {ECO:0000269|PubMed:8943006}.	1.22752	0.189319	1.31537		2.02185	C9J0G0;Q99424	13	Acyl-coenzyme A oxidase;Peroxisomal acyl-coenzyme A oxidase 2	ACOX2
14.0462	14.9084	14.2185	14.6888	15.2766	14.6291	14.7661	13.2609	15.1453	13.4813	15.1175	13.9383	13.7732	15.1028	13.3046	13.2423	13.6578	14.5032	14.0897	NA	1.00772	0.254186	0.527802		1.74948	O15254	10	Peroxisomal acyl-coenzyme A oxidase 3	ACOX3
16.5401	16.8238	16.3758	17.2038	16.4203	15.3451	16.8248	15.9696	15.8884	16.0558	17.3747	17.0412	17.3504	15.6446	17.6401	15.7935	15.9247	16.1218	16.2778	TISSUE SPECIFICITY: T-lymphocytes express only isoform 2. {ECO:0000269|PubMed:9038134}.	0.192619	0.788373	-0.145599		-0.473655	P24666	9	Low molecular weight phosphotyrosine protein phosphatase	ACP1
18.3447	17.6174	18.7586	17.6351	19.4852	18.6425	19.6111	17.97	20.6095	16.6608	17.8959	17.438	17.5219	17.311	16.9753	18.4897	17.8442	18.0175	17.7912	NA	2.24584	0.0495351	1.147	+	3.16337	P11117	10	Lysosomal acid phosphatase	ACP2
11.8805	14.293	15.2329	12.7776	15.5548	15.1192	13.2838	13.4888	16.821	14.6822	15.7088	14.5573	15.1491	13.0585	13.3837	15.479	13.3673	14.5489	11.8937	TISSUE SPECIFICITY: [Isoform 2]: Widely expressed. Expressed in the sarcolemma of skeletal muscle. {ECO:0000269|PubMed:17638863}.;TISSUE SPECIFICITY: Highly expressed in the prostate, restricted to glandular and ductal epithelial cells. Also expressed in bladder, kidney, pancreas, lung, cervix, testis and ovary. Weak expression in a subset of pancreatic islet cells, squamous epithelia, the pilose…	0.05074	0.937686	0.0895464		0.140735	P15309;P15309-2	7	Prostatic acid phosphatase;Isoform 2 of Prostatic acid phosphatase	ACP3
13.1993	14.8836	16.6249	17.3269	15.8394	15.118	13.7866	16.2439	20.026	12.4243	12.7333	12.5479	11.4181	14.1932	14.0778	15.261	12.7228	16.0639	12.1603	NA	2.21445	0.0513654	2.53404	+	3.12971	P13686	4	Tartrate-resistant acid phosphatase type 5	ACP5
14.8038	14.1427	13.9937	16.2156	14.1783	15.3675	15.1951	14.5014	14.8509	13.1316	14.4453	13.7778	12.5985	13.4429	18.9837	14.492	14.6512	14.8523	15.8881	TISSUE SPECIFICITY: Highly expressed in kidney, heart, small intestine, muscle, liver, prostate, testis, ovary and weakly expressed in thymus and colon. {ECO:0000269|PubMed:10506173, ECO:0000269|PubMed:12010880}.	0.105884	0.879592	0.179094		0.278963	Q9NPH0	5	Lysophosphatidic acid phosphatase type 6	ACP6
18.0118	16.9006	19.0253	20.0626	16.5625	18.1555	17.8338	16.3944	18.5714	16.6995	17.6681	17.7477	16.9955	17.7584	18.4333	17.5101	18.497	18.3215	20.4815	NA	0.0451132	0.94455	-0.0648379		-0.125838	E9PF16;Q96CM8;Q96CM8-2;Q96CM8-3	18	Medium-chain acyl-CoA ligase ACSF2, mitochondrial;Medium-chain acyl-CoA ligase ACSF2, mitochondrial;Isoform 2 of Medium-chain acyl-CoA ligase ACSF2, mitochondrial;Isoform 3 of Medium-chain acyl-CoA ligase ACSF2, mitochondrial	ACSF2
16.718	16.171	17.3436	17.3263	17.0742	16.8872	18.1842	16.0183	18.1278	17.43	17.6109	17.0259	16.9482	17.434	17.5664	16.0834	17.1554	17.0934	17.5595	NA	0.13175	0.852132	-0.096183		-0.339584	Q4G176	25	Malonate--CoA ligase ACSF3, mitochondrial	ACSF3
19.2127	18.6282	18.2528	19.6311	19.4922	20.2702	19.1091	18.6595	19.8376	18.0489	17.8096	18.3944	18.329	17.8661	18.3613	18.6099	18.97	17.9257	20.4138	NA;TISSUE SPECIFICITY: Highly expressed in liver, heart, skeletal muscle, kidney and erythroid cells, and to a lesser extent in brain, lung, placenta and pancreas. {ECO:0000269|PubMed:10548543}.	1.47365	0.134962	0.759712	+	2.31158	E7EPM6;P33121;P33121-2	28	Long-chain-fatty-acid--CoA ligase 1;Long-chain-fatty-acid--CoA ligase 1;Isoform 2 of Long-chain-fatty-acid--CoA ligase 1	ACSL1
19.1625	19.8598	18.098	19.7202	18.844	19.2326	19.5048	18.0878	20.2452	18.8988	18.4362	18.2158	18.4174	18.4704	18.7035	18.7636	17.551	18.4188	20.0581	NA	1.12692	0.216325	0.601636		1.89909	O95573	33	Long-chain-fatty-acid--CoA ligase 3	ACSL3
16.3678	17.6624	15.5069	17.6188	16.6796	17.2647	17.7264	16.0907	18.3818	16.3847	15.7325	15.9334	16.2964	16.3412	16.6019	16.5604	15.8696	16.129	17.2742	NA	1.37574	0.152907	0.720923	+	2.1979	O60488;O60488-2	25	Long-chain-fatty-acid--CoA ligase 4;Isoform Short of Long-chain-fatty-acid--CoA ligase 4	ACSL4
17.3714	17.6991	16.9729	18.3143	15.8495	18.426	18.5148	14.5601	17.6229	17.6697	18.3025	16.8218	16.3921	17.3876	17.6498	18.3292	18.739	17.93	17.775	NA	0.435069	0.575034	-0.440689		-0.92636	Q9ULC5;Q9ULC5-3;Q9ULC5-4	27	Long-chain-fatty-acid--CoA ligase 5;Isoform 2 of Long-chain-fatty-acid--CoA ligase 5;Isoform 3 of Long-chain-fatty-acid--CoA ligase 5	ACSL5
14.8586	14.7175	16.4126	15.5312	14.5274	15.7983	13.2126	12.0449	15.1876	16.2218	16.2164	14.6486	14.391	14.7105	15.8286	15.715	15.5133	15.2238	13.0556	NA	0.389482	0.610751	-0.4535		-0.848652	Q53FZ2	12	Acyl-coenzyme A synthetase ACSM3, mitochondrial	ACSM3
16.7715	17.7417	16.8988	17.3144	15.658	17.0652	17.4032	15.7612	17.8877	15.5378	17.1446	16.246	16.1319	16.302	16.6097	16.2992	17.0155	16.8132	17.0308	NA	0.773275	0.359369	0.431553		1.43814	Q9NUB1;Q9NUB1-2	18	Acetyl-coenzyme A synthetase 2-like, mitochondrial;Isoform 2 of Acetyl-coenzyme A synthetase 2-like, mitochondrial	ACSS1
17.4289	18.1451	17.8084	18.9996	16.7396	17.958	18.3189	15.5356	18.0191	16.7288	18.2069	17.6342	17.546	16.8676	17.9341	17.9439	16.1392	17.8733	18.4713	NA	0.12187	0.862423	0.126959		0.316711	Q9NR19;Q9NR19-2	23	Acetyl-coenzyme A synthetase, cytoplasmic;Isoform 2 of Acetyl-coenzyme A synthetase, cytoplasmic	ACSS2
14.638	13.533	13.9974	13.9155	14.8334	13.452	15.0202	15.0567	15.6415	14.7605	13.8323	14.7184	15.1279	15.6705	14.3878	12.8701	13.0544	12.8288	11.4169	NA	0.593954	0.462003	0.587409		1.17881	A0A0B4J1R2;Q9H6R3	7	Acyl-CoA synthetase short-chain family member 3, mitochondrial;Acyl-CoA synthetase short-chain family member 3, mitochondrial	ACSS3
24.927	23.167	21.3297	22.2749	24.42	21.6213	21.7014	22.226	21.879	21.1804	21.1335	23.4534	23.1643	23.7323	22.1154	19.2976	20.634	20.0376	22.2458	NA	0.764765	0.36398	0.916824		1.42632	A6NL76	6	Actin, alpha skeletal muscle	ACTA1
25.5809	23.5773	23.673	24.2517	25.6955	23.2853	24.6725	25.2166	23.6321	23.9057	23.9868	26.286	25.41	25.4973	25.5639	22.0463	23.2485	23.3956	23.5993	NA	0.0721776	0.916077	0.104394		0.196069	P62736	65	Actin, aortic smooth muscle	ACTA2
18.3597	18.8438	17.1151	17.9265	19.6712	17.9375	21.0954	19.3041	18.6102	16.445	17.3599	18.1776	18.9845	16.9012	17.8023	15.9646	15.4702	17.2348	16.5513	NA	2.36292	0.0422259	1.67347	+	3.28855	A0A2R8YEA7	7	Actin, cytoplasmic 1 (Fragment)	ACTB
24.1797	22.8464	23.079	25.3339	23.8622	22.6543	26.8374	24.263	25.5145	23.2136	23.476	24.997	24.2508	24.387	24.4958	21.922	23.6898	23.1102	24.2855	NA	0.447981	0.56476	0.502839		0.947889	Q562R1	10	Beta-actin-like protein 2	ACTBL2
18.7403	14.4797	18.2448	18.403	19.5157	13.3333	13.332	19.3824	13.3404	17.3221	18.0014	17.2592	17.5088	17.7372	16.4566	17.0275	19.2382	18.9614	19.5493	NA	0.781064	0.356336	-1.37601		-1.44893	K7EM38	7	Actin, cytoplasmic 2 (Fragment)	ACTG1
18.0694	10.9489	15.8063	23.9732	16.5696	15.9045	20.4106	15.4885	19.6313	12.1887	13.1973	16.1363	16.8036	15.5036	14.0785	17.2075	15.3025	14.0453	20.1335	NA	0.75535	0.367823	1.9628		1.41318	P63267	4	Actin, gamma-enteric smooth muscle	ACTG2
17.0622	17.6717	17.8853	18.8342	18.2313	17.4742	19.464	17.6079	19.7941	18.9736	17.8635	18.6808	18.1074	18.4637	18.8498	17.8834	18.3853	17.534	20.0064	NA	0.284395	0.702215	-0.249806		-0.657723	O96019	17	Actin-like protein 6A	ACTL6A
13.6096	13.6894	12.1694	11.9794	13.7531	13.4128	13.3404	12.1722	12.7518	13.0218	12.4801	13.1513	12.2885	11.0192	12.308	11.3714	11.0255	12.2618	11.93	NA	NaN	1	0		NaN	H7C144	3	Alpha-actinin-4 (Fragment)	ACTN4
18.0083	16.6958	16.9338	19.0628	17.5197	17.2335	17.8089	17.1206	18.0168	17.8109	18.1816	18.3834	18.0166	17.8873	17.5403	16.5957	16.854	16.7529	18.4255	NA	0.0501082	0.938282	-0.0447991		-0.13907	Q9NZ32	8	Actin-related protein 10	ACTR10
19.5802	19.4623	20.2833	20.4341	20.4206	19.056	20.4714	20.2235	20.684	19.9871	20.3048	20.5663	20.2074	19.9439	20.2275	19.7981	19.5039	19.4008	19.6559	NA	0.206912	0.774133	0.108818		0.503615	P61163	24	Alpha-centractin	ACTR1A
15.9707	15.4375	16.643	16.6787	11.419	15.6455	13.5527	17.0433	13.6937	17.665	18.249	17.6481	17.0299	17.7948	16.8027	15.1186	16.0961	15.9724	16.6148	NA	1.77323	0.0896782	-1.77869	+	-2.64955	P42025	10	Beta-centractin	ACTR1B
20.9308	20.9871	20.804	22.2212	21.4299	20.9788	21.3803	21.3534	21.4649	21.1144	21.1307	20.6745	20.9091	20.71	20.5513	20.9942	20.2979	20.7161	21.3013	NA	1.73945	0.0940142	0.443447		2.61204	P61160	28	Actin-related protein 2	ACTR2
18.6373	18.5107	18.4112	12.0568	12.8339	18.7682	18.1612	10.9551	18.0647	18.1895	18.2646	16.7998	18.1064	17.0404	17.182	18.1118	17.7878	18.129	18.5369	TISSUE SPECIFICITY: Detected in fetal brain. Detected throughout the adult brain, in neurons from gray matter, but not in white matter. Detected in liver, skeletal muscle and pancreas. Detected in lung adenocarcinoma cells with low metastatic potential, but not in lung adenocarcinoma cells with high metastatic potential. {ECO:0000269|PubMed:10806390, ECO:0000269|PubMed:11162478}.	0.796986	0.347024	-1.54824		-1.47087	Q9P1U1	3	Actin-related protein 3B	ACTR3B
14.479	15.3452	13.6756	14.6312	15.1348	15.2083	16.7541	13.3694	17.0064	15.7412	14.7534	14.0878	14.0664	15.9002	15.7012	14.8313	14.0419	13.374	12.9976	NA	0.484443	0.537602	0.517611		1.00763	Q9H9F9	10	Actin-related protein 5	ACTR5
14.9506	15.728	14.2043	14.4727	15.9937	15.6286	16.1183	15.5182	14.0247	15.2678	14.9186	14.4959	14.9569	14.4545	14.2165	14.4981	15.0427	13.9936	14.3114	NA	1.20362	0.19593	0.566509		1.99294	F8VP72;F8VRL1;F8W043;F8W057;F8W0Q1;Q9GZN1;Q9GZN1-2	1	Actin-related protein 6;Actin-related protein 6 (Fragment);Actin-related protein 6;Actin-related protein 6;Actin-related protein 6;Actin-related protein 6;Isoform 2 of Actin-related protein 6	ACTR6
12.5402	14.5304	14.4877	14.4461	15.0815	14.3247	13.5812	13.5363	12.2913	13.1843	13.3483	12.831	12.392	10.7336	13.9101	13.9405	14.2088	13.7484	13.9624	NA	0.7419	0.374137	0.642892		1.39433	Q9H981	5	Actin-related protein 8	ACTR8
16.0102	14.6458	9.9871	13.8442	18.4452	14.9936	16.3621	13.721	12.3304	13.8846	11.7948	13.6182	12.5874	13.874	12.6959	10.9089	11.2565	11.6618	12.8148	TISSUE SPECIFICITY: Expressed in normal parenchymal cells, endothelial cells, fibroblasts and tumor-derived epithelial cells. {ECO:0000269|PubMed:8389764}.	1.48175	0.133641	1.97246	+	2.3209	Q04771	1	Activin receptor type-1	ACVR1
14.1863	13.4038	13.7373	15.6875	12.8625	14.2293	15.1537	13.5525	14.5601	13.016	13.8515	14.4951	14.39	13.8031	13.5429	12.4055	13.7952	13.4515	14.4994	TISSUE SPECIFICITY: Expressed in many tissues, most strongly in kidney, pancreas, brain, lung, and liver.	0.604869	0.455508	0.427536		1.19527	P36896;P36896-4;P36896-5	5	Activin receptor type-1B;Isoform 4 of Activin receptor type-1B;Isoform 5 of Activin receptor type-1B	ACVR1B
19.5311	18.3753	17.7852	18.6822	17.4298	18.6185	18.5449	16.9344	18.2258	16.3368	18.1358	16.5063	16.9016	17.1716	17.376	18.7186	17.8384	18.1454	19.7194	NA;TISSUE SPECIFICITY: Expression is highest in kidney, strong in brain and weaker in placenta and spleen. {ECO:0000269|PubMed:16465618}.	0.675046	0.412429	0.551376		1.29888	A0A1B0GU86;A0A1B0GW23;Q03154	24	Aminoacylase-1;ABHD14A-ACY1 readthrough (Fragment);Aminoacylase-1	ACY1
13.8865	13.2392	13.9922	14.0408	12.2616	13.676	15.4846	11.2114	13.9173	13.2143	13.9065	13.374	13.0254	13.4277	11.4032	14.7732	12.3297	14.7898	15.9941	NA	NaN	1	0		NaN	Q96HD9	4	N-acyl-aromatic-L-amino acid amidohydrolase (carboxylate-forming)	ACY3
17.402	14.9618	13.6431	14.1737	16.0394	14.2839	17.2695	15.2001	14.8049	15.563	16.4477	17.1334	16.2277	16.4732	17.6805	14.6041	14.858	14.6207	12.275	NA;TISSUE SPECIFICITY: Organ-common type isozyme is found in many different tissues.	0.165851	0.813931	-0.279616		-0.416059	G3V2U7;P07311	7	Acylphosphatase;Acylphosphatase-1	ACYP1
17.3046	17.1588	15.6546	11.6934	15.3624	16.3726	15.6944	16.9573	15.572	16.9082	17.0447	17.6785	17.2851	16.7297	17.1924	15.7922	14.5238	15.303	16.6992	NA	0.618293	0.447228	-0.763449		-1.21539	E9PF46;F8WA34;P14621;U3KPX1	3	Acylphosphatase;Acylphosphatase;Acylphosphatase-2;Acylphosphatase (Fragment)	ACYP2
15.8374	16.3196	16.1021	16.4353	16.8032	15.5153	16.8201	15.8568	17.5867	15.2801	15.1816	16.0923	15.2085	14.8031	16.1564	15.8042	14.746	15.5887	15.2909	TISSUE SPECIFICITY: Found in all tissues, occurs in large amounts in T-lymphocytes (PubMed:20959412). Expressed at the time of weaning in gastrointestinal tissues. {ECO:0000269|PubMed:20959412}.	2.72629	0.0282838	0.948874	+	3.67474	P00813	18	Adenosine deaminase	ADA
12.9705	13.2295	16.2946	14.0012	12.6754	13.5698	12.2548	16.1829	15.0616	14.5784	15.8479	15.8747	15.9509	14.8599	15.5055	15.3052	13.176	16.0138	14.9945	NA;TISSUE SPECIFICITY: Detected in blood plasma (at protein level). Widely expressed, with most abundant expression in human adult heart, lung, lymphoblasts, and placenta as well as fetal lung, liver, and kidney. In embryo, expressed in the outflow tract and atrium of the developing heart, the VII/VIII cranial nerve ganglion, and the notochord. {ECO:0000269|PubMed:15926889}.	1.32699	0.163005	-1.18397	+	-2.14057	B4E3Q4;Q9NZK5	13	Adenosine deaminase 2	ADA2
15.4932	15.065	15.6468	16.8282	16.9472	15.7338	16.8266	15.4859	18.0247	15.5697	16.8276	16.0564	15.5238	15.5477	15.7612	15.7189	15.7246	15.7789	16.2056	TISSUE SPECIFICITY: Expressed in the brain (at protein level) (PubMed:23676497). Expressed in spleen, lymph node, thymus, peripheral blood leukocyte, bone marrow, cartilage, chondrocytes and fetal liver (PubMed:11511685, PubMed:9016778). {ECO:0000269|PubMed:11511685, ECO:0000269|PubMed:23676497, ECO:0000269|PubMed:9016778}.	0.523761	0.511206	0.356499		1.07042	O14672	24	Disintegrin and metalloproteinase domain-containing protein 10	ADAM10
13.4418	12.8617	13.9869	14.0982	14.3306	14.0312	14.1206	13.2965	14.8781	12.6562	11.5499	12.3339	12.4212	12.3852	12.1539	13.8806	13.5423	13.8392	13.8487	TISSUE SPECIFICITY: Expressed in colon and small intestine. Expressed in airway smooth muscle and glomerular mesangial cells (at protein level). Ubiquitously expressed. Overexpressed in atherosclerotic lesions. Constitutively expressed in cultured endothelium and smooth muscle. Expressed in chondrocytes. Expressed in airway smooth muscle and glomerular mesangial cells. {ECO:0000269|PubMed:1209138…	2.13007	0.056881	1.03283	+	3.03897	Q13444;Q13444-10;Q13444-12;Q13444-2;Q13444-3;Q13444-4;Q13444-5;Q13444-6;Q13444-7;Q13444-8;Q13444-9	8	Disintegrin and metalloproteinase domain-containing protein 15;Isoform 10 of Disintegrin and metalloproteinase domain-containing protein 15;Isoform 12 of Disintegrin and metalloproteinase domain-containing protein 15;Isoform 2 of Disintegrin and metalloproteinase domain-containing protein 15;Isoform 3 of Disintegrin and metalloproteinase domain-containing protein 15;Isoform 4 of Disintegrin and m…	ADAM15
13.6785	14.5031	13.27	17.7797	13.9212	14.4974	13.4544	13.2294	14.4868	10.1043	11.6538	13.5153	13.0263	12.2805	13.8392	13.3479	13.7891	13.2916	15.7778	TISSUE SPECIFICITY: Ubiquitously expressed. Expressed at highest levels in adult heart, placenta, skeletal muscle, pancreas, spleen, thymus, prostate, testes, ovary and small intestine, and in fetal brain, lung, liver and kidney.	1.10688	0.222741	1.25083		1.87427	P78536	9	Disintegrin and metalloproteinase domain-containing protein 17	ADAM17
11.1851	12.2512	11.5371	13.6596	13.3242	12.4765	12.9575	11.7305	12.1602	12.4888	11.9437	12.3162	12.3711	11.5257	13.1233	10.6548	13.2799	12.1235	11.5443	TISSUE SPECIFICITY: Expressed predominantly in secondary lymphoid tissues, such as lymph node, spleen, small intestine, stomach, colon, appendix and trachea. The lymphocyte population is responsible for expression of this protein in these tissues. Isoform 2 is expressed preferentially in spleen.	NaN	1	0		NaN	Q9UKQ2	5	Disintegrin and metalloproteinase domain-containing protein 28	ADAM28
12.782	12.939	10.4354	13.2198	15.2242	13.2563	15.202	13.3927	15.8818	12.4078	10.9119	13.0041	11.3769	12.5502	13.014	11.2986	10.758	11.9307	12.1649	TISSUE SPECIFICITY: Expressed on neutrophils and monocytes.	1.91198	0.073561	1.65086	+	2.80228	P78325	2	Disintegrin and metalloproteinase domain-containing protein 8	ADAM8
15.3631	15.6451	14.7426	16.2931	15.6735	15.5959	16.4913	13.4374	17.0474	14.624	15.2854	15.0218	14.7969	14.7618	15.6825	14.0542	15.449	15.1371	15.3698	TISSUE SPECIFICITY: Widely expressed. Expressed in chondrocytes. Isoform 2 is highly expressed in liver and heart. {ECO:0000269|PubMed:12054541, ECO:0000269|PubMed:7584026, ECO:0000269|PubMed:8647900, ECO:0000269|PubMed:9016778}.	0.85467	0.31866	0.569435		1.54922	Q13443	15	Disintegrin and metalloproteinase domain-containing protein 9	ADAM9
10.4548	11.1197	14.9574	12.178	11.6253	13.3248	13.8485	11.544	17.0941	15.2049	14.6646	12.0975	13.5169	12.4788	13.623	11.8364	12.9066	13.762	13.3613	TISSUE SPECIFICITY: Expressed highly in the small intestine and appendix, moderately in lymph node, mucosal lining of the colon, thymus, spleen and very weakly in the bone marrow. Predominantly expressed in dendritic cells (DC) of the germinal center. Weakly expressed in monocyte and highly expressed in macrophage. Absent in immature DC. {ECO:0000269|PubMed:14632642, ECO:0000269|PubMed:9271581}.	0.244672	0.738769	-0.440035		-0.580365	O15204;O15204-2	7	ADAM DEC1;Isoform 2 of ADAM DEC1	ADAMDEC1
11.3199	10.8991	13.3182	12.5226	13.1233	11.8456	12.7011	11.4963	13.5776	13.241	11.9574	12.3489	12.4928	11.2872	13.7946	12.315	13.0699	13.1541	11.596	NA	0.221798	0.759516	-0.214189		-0.534273	Q9UHI8	4	A disintegrin and metalloproteinase with thrombospondin motifs 1	ADAMTS1
15.7251	14.5715	12.7791	15.4866	16.2792	14.3877	15.9278	14.771	16.7732	14.4042	11.7812	12.9841	14.8468	14.0156	11.9759	12.6268	13.0045	12.4473	12.2222	NA;TISSUE SPECIFICITY: Expressed at high level in skin, bone, tendon and aorta and at low levels in thymus and brain.	3.18838	0.0193158	2.15815	+	4.16555	A0A1B0GTY3;O95450	3	A disintegrin and metalloproteinase with thrombospondin motifs 2	ADAMTS2
12.8199	12.4906	11.3425	11.9799	13.2565	12.8632	11.8784	10.5581	12.7979	14.2742	13.0032	13.2822	13.5238	13.3677	13.9595	11.1845	11.0981	12.7363	12.4456	TISSUE SPECIFICITY: Expressed primarily in adult skeletal muscle. {ECO:0000269|PubMed:11805097}.	0.809801	0.34049	-0.666749		-1.48843	Q8N6G6;Q8N6G6-6	3	ADAMTS-like protein 1;Isoform 6 of ADAMTS-like protein 1	ADAMTSL1
12.0664	10.741	13.1828	13.1993	13.5908	12.7085	12.7671	13.3389	13.1147	12.0494	11.7055	14.4745	13.2215	13.3824	13.2346	11.5446	9.9657	11.0794	12.405	TISSUE SPECIFICITY: Expressed in epithelial cells of the colon, fallopian tube, skin, breast, prostate, epididymis, liver, pancreatic islets and bile ducts, as well as by vascular endothelial cells, smooth muscle cells, fibroblasts, cortical and ganglionic neurons and cardiac myocytes. Also expressed by malignant epithelial cells in colon cancer, as well as breast, prostate, renal and skin tumors…	NaN	1	0		NaN	P82987;P82987-2	1	ADAMTS-like protein 3;Isoform 2 of ADAMTS-like protein 3	ADAMTSL3
17.0052	14.0231	15.4689	13.5576	16.0212	15.3199	16.2335	15.7222	15.8563	14.405	14.6584	15.5219	15.1732	14.1931	14.9035	13.9197	13.0776	14.4027	13.1727	NA;TISSUE SPECIFICITY: Expressed in colon, heart, leukocyte, liver, lung, skeletal muscle, spleen, testis and placenta. Weaker expression in bone marrow, brain tissue, kidney and pancreas. Expression studies in fetal tissues reveal strong expression in heart, kidney, liver, lung and skeletal muscle, but weaker expression in fetal brain and skin. {ECO:0000269|PubMed:19200529}.	1.74172	0.0937566	1.12475	+	2.61457	A0A669KBE7;Q6UY14;Q6UY14-3	14	ADAMTS-like protein 4;ADAMTS-like protein 4;Isoform 3 of ADAMTS-like protein 4	ADAMTSL4
14.5447	12.6583	13.9752	14.4427	11.6711	11.2067	13.2127	14.4515	12.5288	12.2932	11.1658	13.0849	14.2112	13.1745	12.2707	13.5198	11.2273	13.8642	12.2235	NA	NaN	1	0		NaN	Q6ZMM2;Q6ZMM2-2;X6R4H8	6	ADAMTS-like protein 5;Isoform 2 of ADAMTS-like protein 5;ADAMTS-like protein 5	ADAMTSL5
16.4856	16.7574	16.2335	15.5259	15.4976	15.7808	16.9029	15.6517	17.23	15.8583	16.9055	16.0838	15.8274	16.6601	16.1406	15.6799	14.7014	16.3517	17.1371	TISSUE SPECIFICITY: Expressed at highest levels in brain and at lower levels in peripheral blood leukocytes. {ECO:0000269|PubMed:10448098}.	0.1175	0.866271	0.0949044		0.306485	O75689;O75689-2	14	Arf-GAP with dual PH domain-containing protein 1;Isoform 2 of Arf-GAP with dual PH domain-containing protein 1	ADAP1
12.0628	12.3671	11.1188	12.6673	11.7377	11.9203	10.9663	13.3784	13.5594	13.1161	13.1811	13.5303	13.0536	12.6455	12.8243	10.6982	10.9644	11.2184	11.6284	NA	NaN	1	0		NaN	J3KT70;J3QRA6;J3QRD3	1	Arf-GAP with dual PH domain-containing protein 2;Arf-GAP with dual PH domain-containing protein 2;Arf-GAP with dual PH domain-containing protein 2 (Fragment)	ADAP2
15.0448	14.5668	15.2387	14.0543	15.1022	14.7855	14.5655	15.7673	13.9235	15.3123	16.0807	16.4973	16.2665	14.5948	15.818	14.3099	14.5956	14.0291	18.4343	TISSUE SPECIFICITY: [Isoform 5]: Highly expressed in hippocampus and colon. Expressed in pediatric astrocytomas and the protein has a decreased RNA-editing activity. The decrease in RNA editing correlates with the grade of malignancy of the tumors, with the high grade tumors showing lower editing is seen. {ECO:0000269|PubMed:19156214}.;TISSUE SPECIFICITY: Highly expressed in brain and heart and a…	0.962288	0.272349	-0.81067		-1.69108	P78563;P78563-3;P78563-5	8	Double-stranded RNA-specific editase 1;Isoform 3 of Double-stranded RNA-specific editase 1;Isoform 5 of Double-stranded RNA-specific editase 1	ADARB1
12.4765	12.0534	12.3102	13.0619	12.7396	14.0717	13.6288	11.528	13.1151	14.7846	12.2805	12.8751	12.7149	11.7564	17.2313	16.0301	13.3753	11.9131	11.6987	NA	NaN	1	0		NaN	Q7Z6V5	2	tRNA-specific adenosine deaminase 2	ADAT2
11.991	13.6753	13.7946	12.3289	12.6379	15.7928	12.1172	13.0435	13.5575	11.9964	12.6053	10.9565	12.1636	13.0695	12.5188	12.6459	11.8918	12.507	12.374	NA	NaN	1	0		NaN	D6W601;Q96EY9	3	HCG22695, isoform CRA_a;Probable inactive tRNA-specific adenosine deaminase-like protein 3	ADAT3
14.7834	14.8159	14.8469	14.8135	11.9214	15.7494	17.3118	15.6137	12.7654	13.1372	16.4313	16.4364	12.8407	16.881	13.8163	15.2577	16.4652	15.0597	16.4571	NA	0.339577	0.653352	-0.542546		-0.760226	Q86TW2;Q86TW2-2	5	AarF domain-containing protein kinase 1;Isoform 2 of AarF domain-containing protein kinase 1	ADCK1
13.1407	12.3803	11.0141	13.8881	15.0985	13.7769	13.0928	11.7491	13.0235	12.4364	12.6474	11.653	12.6333	12.0176	10.9305	11.781	12.4866	11.0269	12.1771	NA	NaN	1	0		NaN	Q3MIX3	6	Uncharacterized aarF domain-containing protein kinase 5	ADCK5
10.676	13.0751	11.918	12.0708	14.9685	13.4483	12.989	12.4744	16.7182	14.2931	12.6757	13.157	11.6964	11.4481	13.1195	11.3814	11.918	14.2352	13.2659	TISSUE SPECIFICITY: Detected in airway epithelial cells and testis (at protein level) (PubMed:17591988). Weakly expressed in multiple tissues. Expressed in brain, heart, kidney, liver, lung, pancreas, peripheral blood leukocytes, placenta, skeletal muscle, stomach, thymus, airway epithelial cells, duodenum, jejunum and ileum. Very low level of expression in bone. {ECO:0000269|PubMed:11932268, ECO…	NaN	1	0		NaN	Q96PN6	1	Adenylate cyclase type 10	ADCY10
11.8935	12.4199	13.6113	11.7245	11.8995	14.2704	12.8555	11.3397	13.8929	12.8118	14.4094	11.9659	13.2076	11.7447	12.4565	13.187	13.4924	13.9078	12.9279	TISSUE SPECIFICITY: Detected in peripheral blood mononuclear leukocytes (at protein level) (PubMed:17916776). Detected in thyroid (PubMed:10978539). {ECO:0000269|PubMed:10978539}.	0.37404	0.623427	-0.354744		-0.821687	O43306;O43306-2	8	Adenylate cyclase type 6;Isoform 2 of Adenylate cyclase type 6	ADCY6
17.5291	17.2735	17.8115	18.66	17.3142	17.4836	18.0061	17.8676	17.4805	17.6517	17.9304	18.1185	17.5476	17.4662	18.1151	17.1476	17.4505	16.9912	18.9955	TISSUE SPECIFICITY: Expressed in all tissues. Found in much higher levels in reticulocytes than the beta subunit.	0.0413089	0.949651	-0.0274072		-0.115674	P35611-3	39	Isoform 3 of Alpha-adducin	ADD1
11.2682	12.342	15.6781	22.2572	12.5552	11.1773	15.4971	13.4003	13.8839	13.3728	15.094	16.6219	15.4472	15.2278	16.9832	15.9554	14.1466	11.7018	20.7856	TISSUE SPECIFICITY: Expressed mainly in brain, spleen, kidney cortex and medulla, and heart. Also expressed in human umbilical vein endothelial cells, human vascular smooth muscle cells, kidney tubular cells and K-562 cell line. {ECO:0000269|PubMed:12951058}.	0.460746	0.554376	-1.30484		-0.968976	P35612	10	Beta-adducin	ADD2
17.7473	17.7403	18.0905	18.6391	17.7883	18.2593	17.5358	17.6837	17.5118	17.8534	18.08	17.6037	17.4961	16.7676	18.2081	17.1965	17.9554	17.3386	18.5297	TISSUE SPECIFICITY: Isoform 1 is ubiquitously expressed. {ECO:0000269|PubMed:8893809}.	0.40723	0.597466	0.185539		0.879231	Q9UEY8	37	Gamma-adducin	ADD3
12.7255	12.8374	13.8932	9.63082	14.7432	12.7108	16.8569	12.3655	13.2968	14.2605	13.1797	13.3675	13.0681	11.8112	12.9387	11.9091	13.1501	13.0986	12.0387	TISSUE SPECIFICITY: Expressed in endothelial cells (at protein level) (PubMed:15021905, PubMed:16982628). Abundantly expressed in heart, placenta, ovary, small intestine, and colon (PubMed:15021905). {ECO:0000269|PubMed:15021905, ECO:0000269|PubMed:16982628}.	0.216042	0.765416	0.346685		0.522482	Q96PE1;Q96PE1-2	4	Adhesion G protein-coupled receptor A2;Isoform 2 of Adhesion G protein-coupled receptor A2	ADGRA2
0.651642	12.9329	10.9164	13.5443	12.9565	14.4152	13.9252	10.8012	13.8014	13.0708	13.4408	12.8329	12.7912	12.1138	12.4561	12.0842	7.43004	13.7781	10.8912	NA	NaN	1	0		NaN	Q8IWK6-2	1	Isoform 2 of Adhesion G protein-coupled receptor A3	ADGRA3
11.8575	9.63283	12.5987	14.521	13.0865	11.531	11.618	9.56431	12.4006	13.4254	13.5758	12.2502	11.0665	12.4689	12.0241	11.1189	9.38616	12.4511	11.5388	TISSUE SPECIFICITY: Displays a predominantly leukocyte-restricted expression, with highest levels in neutrophils, monocytes and macrophages. {ECO:0000269|PubMed:11279179}.	0.0345338	0.956931	-0.0627782		-0.0973816	Q9BY15	2	Adhesion G protein-coupled receptor E3	ADGRE3
18.5076	18.6053	18.2618	19.3269	19.1001	18.6628	19.3016	18.9512	20.4278	16.8616	17.8548	17.2636	17.6991	17.3417	17.7449	18.0662	17.5403	18.1274	18.156	TISSUE SPECIFICITY: Broadly expressed, found on most hematopoietic cells, including activated lymphocytes, monocytes, macrophages, dendritic cells, and granulocytes. Expressed also abundantly by smooth muscle cells. Expressed in thyroid, colorectal, gastric, esophageal and pancreatic carcinomas too. Expression are increased under inflammatory conditions in the CNS of multiple sclerosis and in syn…	4.39162	0.00646154	1.35055	+	5.48089	P48960	25	Adhesion G protein-coupled receptor E5	ADGRE5
11.9592	12.2046	13.316	12.7344	13.7076	11.3702	14.0555	13.0612	14.6441	12.0626	12.4859	12.3909	11.4253	12.4737	13.5441	10.5584	11.7047	12.139	11.4186	NA;TISSUE SPECIFICITY: Expressed very widely in all normal tissues tested. Expression is variable in tumor cell lines, apparently elevated in some lines and absent or markedly reduced in others. {ECO:0000269|PubMed:10030676}.	1.4684	0.135367	0.985525	+	2.30553	B1ALU1;B1ALU3;O95490;O95490-2;O95490-3;O95490-4;O95490-5;O95490-6;O95490-7	4	Adhesion G protein-coupled receptor L2;Adhesion G protein-coupled receptor L2;Adhesion G protein-coupled receptor L2;Isoform 2 of Adhesion G protein-coupled receptor L2;Isoform 3 of Adhesion G protein-coupled receptor L2;Isoform 4 of Adhesion G protein-coupled receptor L2;Isoform 5 of Adhesion G protein-coupled receptor L2;Isoform 6 of Adhesion G protein-coupled receptor L2;Isoform 7 of Adhesion …	ADGRL2
11.7842	12.5491	15.1538	11.989	13.5548	11.7224	12.9649	12.5202	12.0434	12.281	12.7095	12.9196	11.4619	12.3207	12.7974	10.7526	12.1709	13.777	16.7912	NA	NaN	1	0		NaN	E7EMR3;E7EN28;E7ENK1;E7ES20;E7ESV6;E7ETE3;E7EUP0;E7EUW2;E7EVD6;E7EW95;E7EX52;E9PBG4;Q9HAR2;Q9HAR2-2;Q9HAR2-4	5	Adhesion G protein-coupled receptor L3;Adhesion G protein-coupled receptor L3;Adhesion G protein-coupled receptor L3;Adhesion G protein-coupled receptor L3;Adhesion G protein-coupled receptor L3;Adhesion G protein-coupled receptor L3;Adhesion G protein-coupled receptor L3;Adhesion G protein-coupled receptor L3;Adhesion G protein-coupled receptor L3;Adhesion G protein-coupled receptor L3;Adhesion …	ADGRL3
12.6208	11.8528	12.1434	13.1722	11.388	11.4778	13.2186	14.9914	11.5147	13.054	11.8741	13.1782	14.3755	11.6881	13.1224	11.4748	11.3941	10.319	13.2854	NA;TISSUE SPECIFICITY: Detected in the majority of epithelial cells in tumor and normal tissues. Expressed also in human umbilical vein endothelial cells. {ECO:0000269|PubMed:23871637}.	NaN	1	0		NaN	A0A1W2PP07;A0A590UJN9;A0A590UJU5;A0A590UJX8;Q9HBW9	1	Adhesion G protein-coupled receptor L4	ADGRL4
17.7491	18.3263	22.8319	19.1978	16.4411	19.2301	18.0228	20.852	18.1645	16.6908	23.0114	22.6321	21.5155	19.562	21.8799	18.806	18.262	20.7044	18.6312	NA	0.672895	0.413347	-1.19002		-1.29576	P00325	38	All-trans-retinol dehydrogenase [NAD(+)] ADH1B	ADH1B
11.5491	18.0897	20.9761	20.0538	12.4997	16.1564	16.3601	17.6549	19.075	14.1299	21.5456	19.4507	19.3526	16.6169	20.9396	18.4917	18.2236	21.2777	20.4177	NA	0.938102	0.280969	-2.10961		-1.65965	P00326	9	Alcohol dehydrogenase 1C	ADH1C
18.8351	18.0504	19.0629	18.7564	18.489	18.0111	18.1177	19.3371	18.3693	17.936	18.9555	19.6031	18.4541	18.5484	19.4045	17.6618	17.644	18.2488	18.1768	NA	0.137198	0.845731	0.0954822		0.352053	P11766	26	Alcohol dehydrogenase class-3	ADH5
12.7067	15.189	15.9032	11.9611	12.0791	15.4052	13.7171	13.0143	13.145	13.6863	15.0171	15.1564	14.7389	13.2056	16.3515	14.138	14.5475	14.898	13.3663	TISSUE SPECIFICITY: Stomach and liver.	0.800842	0.34514	-0.830496		-1.47617	P28332;P28332-2	5	Alcohol dehydrogenase 6;Isoform 2 of Alcohol dehydrogenase 6	ADH6
16.6781	17.7481	16.0386	16.3018	16.6682	15.7738	16.0617	15.8454	15.7375	17.4153	16.2924	16.5505	16.625	16.0993	15.5268	15.4486	15.4469	16.115	16.4042	TISSUE SPECIFICITY: Detected in heart, colon, lung, stomach, brain, spleen, liver, skeletal muscle and kidney. {ECO:0000269|PubMed:11602742, ECO:0000269|PubMed:14718544}.	0.172724	0.807466	0.124615		0.43104	Q9BV57	8	1,2-dihydroxy-3-keto-5-methylthiopentene dioxygenase	ADI1
16.0987	16.1094	15.5868	16.8156	12.2962	15.9218	17.5012	15.9876	12.427	13.1851	12.5149	12.2773	12.9544	13.3313	14.0716	10.7915	14.3179	13.8401	12.5275	TISSUE SPECIFICITY: Synthesized exclusively by adipocytes and secreted into plasma. {ECO:0000269|PubMed:8947845}.	2.6891	0.0299935	2.43486	+	3.6353	Q15848	1	Adiponectin	ADIPOQ
17.6814	16.6433	15.3901	17.674	16.4237	16.02	17.2565	17.038	15.7648	17.1209	16.6979	17.42	16.1465	17.2804	16.9152	16.2557	16.3454	16.4896	16.293	TISSUE SPECIFICITY: Expressed in adipose tissue (at protein level). Highly expressed in omental and subcutaneous adipose tissues. Expressed in heart, cornea, liver, kidney and spleen. {ECO:0000269|PubMed:23239344, ECO:0000269|Ref.4}.	0.0497697	0.938658	-0.0417953		-0.138177	Q15847	6	Adipogenesis regulatory factor	ADIRF
17.2581	18.039	16.7217	18.3794	16.6067	17.3398	17.3303	15.9402	16.7858	16.8838	16.9009	17.2963	17.3701	16.887	17.8221	17.2076	16.4862	16.8513	17.3022	TISSUE SPECIFICITY: Widely expressed. Highest level in placenta, liver, muscle and kidney.	0.0762347	0.912778	0.0549458		0.206301	P55263	19	Adenosine kinase	ADK
15.9662	16.1964	14.8708	16.6596	15.3211	16.3969	16.7557	14.9947	16.5683	16.035	15.5813	15.2474	15.0688	16.057	15.2185	15.3165	16.2289	14.3797	15.7552	TISSUE SPECIFICITY: Widely expressed. Strong expression in heart, skeletal muscle, kidney and placenta. In brain, expression is stronger in the cerebellum and cortex regions. No expression detected in the colon. Strong increase of expression in colon and breast cancer tissues.	0.909774	0.294625	0.481127		1.62251	Q9H2P0	37	Activity-dependent neuroprotector homeobox protein	ADNP
14.3027	15.4372	14.7645	14.014	15.3516	15.1029	14.5982	15.0688	15.1098	14.6175	14.7836	14.8332	14.5727	14.4235	15.4615	13.7371	14.8733	15.0624	14.2313	NA	0.432881	0.576869	0.201483		0.922692	Q96SZ5	6	2-aminoethanethiol dioxygenase	ADO
16.4399	16.8283	17.1821	17.4081	17.2075	16.6214	17.1465	16.6794	18.4721	16.3371	16.344	18.1553	15.6992	16.7435	16.1089	16.8732	16.6204	16.0264	16.8769	NA	1.04667	0.240464	0.530986		1.79891	Q9BRR6;Q9BRR6-2	12	ADP-dependent glucokinase;Isoform 2 of ADP-dependent glucokinase	ADPGK
16.0368	15.7022	13.7711	13.2423	15.5681	14.7694	14.595	16.2114	14.8473	15.5845	15.7891	15.3152	15.268	15.7037	16.0781	14.8769	14.6951	14.8456	14.4728	NA	0.36134	0.634944	-0.291379		-0.79925	P54922	5	[Protein ADP-ribosylarginine] hydrolase	ADPRH
16.6512	16.413	17.0097	17.5271	16.8383	17.2032	17.614	17.4678	17.8561	15.6897	16.4101	15.4914	16.8159	16.5772	16.1483	16.339	16.7432	16.6378	16.7297	TISSUE SPECIFICITY: Ubiquitous. {ECO:0000269|PubMed:16278211}.	2.84239	0.0261526	0.817374	+	3.79786	Q9NX46	15	ADP-ribose glycohydrolase ARH3	ADPRS
17.9832	18.7703	17.9208	18.8165	18.1234	18.6046	19.4884	18.1484	18.7942	17.7361	17.5247	16.9264	17.2024	17.2026	17.3615	18.2038	17.9105	17.9253	17.9359	NA	3.35423	0.0177455	0.923706	+	4.34276	Q16186	10	Proteasomal ubiquitin receptor ADRM1	ADRM1
16.6827	17.431	17.1351	18.0881	17.1206	17.0079	17.9338	16.9853	17.2359	17.5875	17.6914	17.6134	17.5691	16.8296	18.2006	17.0413	16.8252	16.7626	17.191	NA;TISSUE SPECIFICITY: Ubiquitously expressed. Both isoforms are produced by all tissues. Isoform 2 is 10-fold less abundant than isoform 1.	0.0686051	0.92028	-0.040032		-0.186997	A0A1B0GTJ7;A0A1B0GWJ0;P30566	27	Adenylosuccinate lyase	ADSL
12.2793	13.4199	10.7088	13.2528	13.1697	11.8425	13.8597	12.8742	14.2285	9.75921	13.2047	13.6112	11.9618	12.2582	12.7974	10.3461	11.2924	11.7783	12.6101	TISSUE SPECIFICITY: Predominantly expressed in skeletal muscle and heart, as well as in several hematopoietic cell lines and solid tumors. {ECO:0000269|PubMed:15786719}.	NaN	1	0		NaN	Q8N142;Q8N142-2	1	Adenylosuccinate synthetase isozyme 1;Isoform 2 of Adenylosuccinate synthetase isozyme 1	ADSS1
17.1265	18.2871	17.4708	18.7308	17.4563	18.0306	17.5742	17.041	17.6184	17.4985	17.9444	17.2797	17.4942	17.0735	17.6538	17.0688	17.1077	17.3592	17.2756	NA	0.944738	0.278944	0.328419		1.66829	P30520	17	Adenylosuccinate synthetase isozyme 2	ADSS2
21.1365	19.0022	17.9075	19.5199	19.8135	18.3324	19.2263	20.1369	19.3759	20.083	18.2	18.6717	19.3004	19.1202	18.0025	17.0979	17.9731	18.0057	17.3844	TISSUE SPECIFICITY: Expressed in osteoblast and visceral fat. {ECO:0000269|PubMed:8920928}.	1.49151	0.132094	0.999572	+	2.33212	Q8IUX7	31	Adipocyte enhancer-binding protein 1	AEBP1
16.2356	16.5342	15.0387	16.6715	17.8769	15.9905	15.8837	17.1429	16.471	17.0518	16.1266	16.6651	16.251	17.1692	16.0367	14.7703	15.5842	15.1667	16.5666	TISSUE SPECIFICITY: Low expression in normal breast epithelial cell line MCF-10A and in tumorigenic breast cancer cell lines MCF-7, T-47D and ZR-75-1. Highly expressed in the invasive breast cancer cell lines MDA-MB-231 and MDA-MB-435. Overexpressed in prostate carcinoma. {ECO:0000269|PubMed:17520695, ECO:0000269|PubMed:17885682}.	0.358025	0.637258	0.288404		0.793353	Q8N556;Q8N556-2	12	Actin filament-associated protein 1;Isoform 2 of Actin filament-associated protein 1	AFAP1
15.8236	16.3184	15.5131	16.1929	16.0385	15.4557	17.1579	16.3849	16.5276	16.8193	15.4761	15.0423	15.3314	15.6266	15.422	15.1449	15.8958	15.2497	15.8944	TISSUE SPECIFICITY: Detected in spleen and thyroid, and at lower levels in kidney, brain, lung and pancreas. {ECO:0000269|PubMed:17412687}.	1.50976	0.129299	0.566701	+	2.35305	Q8N4X5;Q8N4X5-2;Q8N4X5-4	18	Actin filament-associated protein 1-like 2;Isoform 2 of Actin filament-associated protein 1-like 2;Isoform 4 of Actin filament-associated protein 1-like 2	AFAP1L2
13.4283	12.5986	13.9428	13.55	12.6895	14.5228	13.3183	10.8583	13.0678	15.4516	13.6297	12.6886	10.7041	15.0051	13.1346	13.2998	12.7174	13.3179	13.4931	NA	NaN	1	0		NaN	H0Y948	3	Afadin (Fragment)	AFDN
12.3872	13.216	13.8351	24.2103	17.9827	18.9757	18.7769	19.0947	19.3894	13.5764	18.385	13.4919	18.3322	18.1338	13.2865	19.2465	19.5021	11.9702	23.765	TISSUE SPECIFICITY: Ubiquitously expressed. Strongly expressed in heart, placenta, skeletal muscle, pancreas and to a lower extent in brain. {ECO:0000269|PubMed:10588740, ECO:0000269|PubMed:12065898}.	0.12867	0.854738	0.571909		0.33249	Q9UHB7;Q9UHB7-2	2	AF4/FMR2 family member 4;Isoform 2 of AF4/FMR2 family member 4	AFF4
13.82	14.2737	15.4049	15.4255	12.835	13.4772	18.6049	14.1449	18.8048	14.7968	15.776	15.3506	15.0912	15.6944	15.0852	14.1066	14.7987	14.4291	14.67	NA	0.119994	0.864034	0.219167		0.312331	H0Y5F4;Q8WV93	4	AFG1-like ATPase (Fragment);AFG1-like ATPase	AFG1L
17.9053	17.3899	17.976	19.5168	17.3988	18.1248	18.4253	16.3494	19.2108	17.717	18.3801	17.6216	17.6082	17.5487	17.2459	16.7781	18.4179	18.0198	19.6714	TISSUE SPECIFICITY: Ubiquitous. Highly expressed in the cerebellar Purkinje cells. {ECO:0000269|PubMed:20208537}.	0.126686	0.856296	0.132145		0.327903	Q9Y4W6	36	AFG3-like protein 2	AFG3L2
16.7033	15.8347	17.1795	17.8182	17.6587	17.5009	16.771	17.6324	16.9301	15.9749	16.9632	17.742	17.4619	16.647	17.7313	17.0724	15.4271	17.8561	14.709	TISSUE SPECIFICITY: High level detected in plasma but also in extravascular fluids such as follicular and cerebrospinal fluids (at protein level). {ECO:0000269|PubMed:12463752, ECO:0000269|PubMed:15952736, ECO:0000269|PubMed:7517938}.	0.400797	0.602588	0.355812		0.868198	P43652	25	Afamin	AFM
12.2509	18.1712	10.2809	14.1554	13.092	11.8035	13.271	19.6774	13.1102	19.8258	20.5565	21.1192	19.0445	19.9713	12.9666	10.4593	11.0707	10.8666	11.8728	NA;TISSUE SPECIFICITY: Plasma. Synthesized by the fetal liver and yolk sac.	NaN	1	0		NaN	J3KMX3;P02771	5	Alpha-fetoprotein	AFP
15.9626	15.2452	14.5842	16.1584	12.6459	15.4919	12.884	15.4061	13.7384	15.2242	15.2153	15.3254	14.8553	14.4214	14.17	14.3228	14.7482	14.1195	16.3473	NA	0.165547	0.813847	-0.195294		-0.415392	Q6ULP2;Q6ULP2-6;Q6ULP2-8;Q6ULP2-9	8	Aftiphilin;Isoform 2 of Aftiphilin;Isoform 4 of Aftiphilin;Isoform 5 of Aftiphilin	AFTPH
12.3562	13.1481	12.2569	13.8278	13.6109	12.4201	12.7957	11.135	13.1706	12.2119	12.8877	15.9497	14.2713	14.7516	15.9591	12.1632	12.501	12.1961	12.7846	NA;TISSUE SPECIFICITY: Widely expressed. {ECO:0000269|PubMed:12388557, ECO:0000269|PubMed:12640130, ECO:0000269|PubMed:15381706, ECO:0000269|PubMed:16079295}.	0.767012	0.362612	-0.82079		-1.42944	A0A087X1U1;E7EUN2;F5GXM9;Q9UPQ3;Q9UPQ3-2	3	Arf-GAP with GTPase, ANK repeat and PH domain-containing protein 1;Arf-GAP with GTPase, ANK repeat and PH domain-containing protein 1;Arf-GAP with GTPase, ANK repeat and PH domain-containing protein 1;Arf-GAP with GTPase, ANK repeat and PH domain-containing protein 1;Isoform 2 of Arf-GAP with GTPase, ANK repeat and PH domain-containing protein 1	AGAP1
15.7906	14.8039	15.2731	12.986	14.8568	14.9067	17.391	14.8802	16.4745	15.2996	15.6139	14.8387	14.247	14.6024	16.5017	13.6132	13.1014	13.1455	15.0828	TISSUE SPECIFICITY: Widely expressed. {ECO:0000269|PubMed:15381706, ECO:0000269|PubMed:16461359}.	0.628955	0.439206	0.657913		1.23126	Q96P47;Q96P47-2;Q96P47-4	6	Arf-GAP with GTPase, ANK repeat and PH domain-containing protein 3;Isoform 2 of Arf-GAP with GTPase, ANK repeat and PH domain-containing protein 3;Isoform 4 of Arf-GAP with GTPase, ANK repeat and PH domain-containing protein 3	AGAP3
15.9338	16.881	15.4749	16.3286	12.3255	15.852	13.8978	15.5473	16.1031	16.88	16.4568	16.1253	15.7807	15.8765	15.2012	15.6064	15.8038	14.9114	16.7741	TISSUE SPECIFICITY: Ubiquitously expressed. {ECO:0000269|PubMed:7634337}.	0.582278	0.46936	-0.570075		-1.16109	P52594;P52594-2;P52594-3;P52594-4	5	Arf-GAP domain and FG repeat-containing protein 1;Isoform 2 of Arf-GAP domain and FG repeat-containing protein 1;Isoform 3 of Arf-GAP domain and FG repeat-containing protein 1;Isoform 4 of Arf-GAP domain and FG repeat-containing protein 1	AGFG1
14.5744	15.8261	15.5995	13.5137	12.5477	15.1392	15.2224	14.6274	14.4718	15.5169	15.4854	15.1267	15.3968	15.8804	16.2857	16.0052	14.2979	14.8147	12.6215	NA	0.542231	0.496706	-0.529557		-1.09939	O95081	11	Arf-GAP domain and FG repeat-containing protein 2	AGFG2
17.3344	17.1416	16.161	17.969	16.9145	17.2014	17.2872	15.8955	18.9299	16.2205	16.6745	16.4648	16.567	17.0335	16.4479	16.4137	17.1189	16.3505	17.5167	TISSUE SPECIFICITY: Highly expressed in muscle, heart, kidney and brain. {ECO:0000269|PubMed:15939762}.	0.938195	0.28101	0.523039		1.65977	Q53H12	18	Acylglycerol kinase, mitochondrial	AGK
16.5578	17.4749	17.7339	17.8524	17.1623	17.234	17.8691	17.3204	18.1668	16.9688	17.0962	17.6272	17.2641	16.9039	17.4888	17.2693	16.9814	17.1109	17.9292	TISSUE SPECIFICITY: Liver, kidney and lymphoblastoid cells express predominantly isoform 1;whereas muscle and heart express not only isoform 1, but also muscle-specific isoform mRNAs (isoforms 2, 3 and 4). Isoforms 5 and 6 are present in both liver and muscle.	0.59582	0.460719	0.221776		1.18163	P35573	76	Glycogen debranching enzyme	AGL
18.4504	17.6008	17.7979	20.5241	12.7237	17.6923	19.4792	14.7088	19.0367	16.0341	15.8135	12.3981	15.8805	16.9441	14.8615	17.942	18.4971	18.3083	19.5802	TISSUE SPECIFICITY: Highly expressed in liver and kidney. Also found in skeletal muscle, fetal liver, brain, testis, skin and the gastrointestinal tract. Within brain, expression is higher in the cerebral cortex with lower levels in the medulla and spinal cord. {ECO:0000269|PubMed:11804860, ECO:0000269|PubMed:11914032}.	0.41854	0.588514	0.931146		0.898499	Q9BSE5	12	Agmatinase, mitochondrial	AGMAT
17.2613	16.6335	16.7495	17.5522	17.3888	16.6372	17.8823	17.8853	17.7149	17.4305	17.7957	18.1353	17.8731	17.5095	17.7747	16.5246	16.5556	16.1197	17.0321	NA	0.0322561	0.958895	0.0254729		0.0911758	Q9UL18	24	Protein argonaute-1	AGO1
16.3917	15.8269	15.0263	16.7549	16.3702	16.2076	16.4604	16.337	15.7425	16.0519	16.0006	16.5635	15.9584	15.9981	16.1788	15.1044	15.5255	15.2026	16.21	NA	0.53715	0.501352	0.244781		1.09145	Q9UKV8;Q9UKV8-2	22	Protein argonaute-2;Isoform 2 of Protein argonaute-2	AGO2
15.8916	15.4626	15.2866	17.658	17.6257	15.9449	18.4458	16.8146	20.1002	14.4326	15.741	16.0927	16.107	15.9495	15.5343	14.453	14.2408	13.9172	14.7032	NA	2.38861	0.0412522	1.90842	+	3.31596	Q9H9G7	17	Protein argonaute-3	AGO3
17.6253	17.4233	16.3921	16.3774	17.6869	17.1011	18.1591	16.8344	18.7068	15.8081	16.8151	18.3443	17.1383	16.6291	17.8987	16.3992	15.9584	16.0513	16.9173	TISSUE SPECIFICITY: Widely expressed. Expressed in adipose tissue and at high levels in testis and pancreas. Expressed at lower levels in tissues such as heart, brain, placenta, kidney, lung, spleen, thymus, prostate, ovary, intestine, colon, leukocyte and liver. {ECO:0000269|PubMed:21873652}.	0.850151	0.32078	0.571416		1.54315	Q99943	8	1-acyl-sn-glycerol-3-phosphate acyltransferase alpha	AGPAT1
16.4806	16.7824	15.3406	12.7588	13.0522	17.782	17.549	15.0685	18.9418	15.3459	14.3716	13.0621	15.5458	15.1476	15.9563	15.4898	15.9539	15.5039	16.614	TISSUE SPECIFICITY: Expressed predominantly in adipose tissue, pancreas and liver. {ECO:0000269|PubMed:21873652, ECO:0000269|PubMed:9242711}.	0.425127	0.582958	0.673784		0.909644	O15120	4	1-acyl-sn-glycerol-3-phosphate acyltransferase beta	AGPAT2
16.1999	15.5609	15.3913	15.6653	15.9987	16.5527	17.0361	15.437	18.3501	15.1764	15.8433	15.5582	14.8944	15.5476	15.8332	15.6752	15.4665	15.8864	15.9434	TISSUE SPECIFICITY: Widely expressed with highest levels in testis, pancreas and kidney, followed by spleen, lung, adipose tissue and liver. {ECO:0000269|PubMed:21173190}.	1.24664	0.184464	0.661078		2.04486	Q9NRZ7	8	1-acyl-sn-glycerol-3-phosphate acyltransferase gamma	AGPAT3
15.3391	15.1494	14.3133	14.0385	15.618	15.2489	15.7862	15.4188	16.3141	13.3205	12.699	13.3724	11.7422	13.0704	12.8627	15.1605	13.7851	14.7354	13.1793	TISSUE SPECIFICITY: Widely expressed with highest levels in skeletal muscle, followed by heart, liver, prostate and thymus. {ECO:0000269|PubMed:21173190}.	3.66314	0.0144242	1.85462	+	4.67553	Q9NRZ5;Q9NRZ5-2	3	1-acyl-sn-glycerol-3-phosphate acyltransferase delta;Isoform 2 of 1-acyl-sn-glycerol-3-phosphate acyltransferase delta	AGPAT4
17.2299	18.192	16.6276	18.0653	16.8523	18.7555	18.1987	16.1087	18.6365	17.3142	17.2756	15.6021	16.8067	17.451	17.7746	17.599	18.0507	17.6363	18.017	TISSUE SPECIFICITY: Widely expressed. {ECO:0000269|PubMed:16620771, ECO:0000269|PubMed:21173190}.	0.31905	0.671286	0.276893		0.72272	Q9NUQ2	5	1-acyl-sn-glycerol-3-phosphate acyltransferase epsilon	AGPAT5
17.1137	17.0814	16.3243	18.3004	16.6431	17.1492	17.8088	15.9658	19.3293	17.1194	16.765	15.6704	16.5795	17.3026	16.6165	16.5332	17.7597	16.9795	16.857	NA	0.666048	0.416993	0.48348		1.2858	O00116	21	Alkyldihydroxyacetonephosphate synthase, peroxisomal	AGPS
24.5292	24.5303	25.4205	25.2758	16.183	24.3267	24.1054	23.4827	25.0627	23.851	26.5403	23.7513	24.54	23.3703	23.5225	25.6025	24.0824	25.2769	25.2132	TISSUE SPECIFICITY: Expressed strongly in trachea, lung, stomach, colon, prostate and small intestine. Expressed weakly in pituitary gland, salivary gland, mammary gland, bladder, appendix, ovary, fetal lung, uterus, pancreas, kidney, fetal kidney, testis, placenta, thyroid gland and in estrogen receptor (ER)-positive breast cancer cell lines. {ECO:0000269|PubMed:9790916}.	0.447526	0.564894	-0.917674		-0.947134	O95994	33	Anterior gradient protein 2 homolog	AGR2
20.7759	19.5399	22.2709	20.6493	12.2965	20.2898	20.0293	19.3959	22.9516	20.077	23.2369	20.6201	20.3586	21.1489	19.4551	21.1719	20.1	21.5378	22.257	TISSUE SPECIFICITY: Expressed in the lung, in the ciliated cells of the airway epithelium (PubMed:25751668). Expression increased with differentiation of airway epithelial cells (PubMed:25751668). Not detected in the mucous cells (PubMed:25751668). Expressed in ciliated cells in the oviduct (PubMed:26170690). Also detected in stomach, colon, prostate and liver (PubMed:25751668). Expressed in brea…	0.579773	0.471748	-1.19641		-1.15727	Q8TD06	16	Anterior gradient protein 3	AGR3
20.2832	18.6081	18.3614	19.4635	19.913	18.5541	19.6812	19.1188	19.6502	18.5577	18.189	18.1962	18.2827	18.5922	17.9331	17.3493	17.6828	18.1476	18.7054	TISSUE SPECIFICITY: Expressed in basement membranes of lung and kidney. Muscle- and neuron-specific isoforms are found. Isoforms (y+) with the 4 AA insert and (z+8) isoforms with the 8 AA insert are all neuron-specific. Isoforms (z+11) are found in both neuronal and non-neuronal tissues. {ECO:0000269|PubMed:16487930, ECO:0000269|PubMed:20551380, ECO:0000269|PubMed:9652404}.	3.45484	0.0166452	1.12903	+	4.45072	O00468-6	57	Isoform 6 of Agrin	AGRN
15.7865	15.8784	17.1378	19.1059	17.5581	17.1363	19.146	17.5077	16.7097	15.6408	17.0086	17.501	16.8747	15.6484	17.8817	16.4355	16.0609	16.2945	15.6522	TISSUE SPECIFICITY: Expressed by the liver and secreted in plasma.	1.04323	0.24198	0.829766		1.79456	P01019	14	Angiotensinogen	AGT
13.5778	11.3418	13.959	12.8104	10.994	15.9305	10.0284	13.9939	12.3219	12.3421	13.9857	13.4231	13.5857	14.1445	13.5436	13.5729	12.9927	13.2434	13.2962	NA	0.523894	0.51118	-0.639913		-1.07063	J3KNS1;Q9UPW5-3	2	Cytosolic carboxypeptidase 1;Isoform 3 of Cytosolic carboxypeptidase 1	AGTPBP1
15.3305	15.6797	14.362	16.4683	15.437	15.6266	16.4417	15.025	16.4539	15.623	15.2316	14.4897	14.4695	15.2214	15.0402	14.9929	15.3315	14.549	15.6765	NA	1.34229	0.159372	0.584645	+	2.15862	Q8WYP5;Q8WYP5-2;Q8WYP5-3	40	Protein ELYS;Isoform 2 of Protein ELYS;Isoform 3 of Protein ELYS	AHCTF1
20.3488	21.739	20.7281	21.451	20.117	21.2193	20.7162	20.3757	20.7345	21.1844	21.251	21.0342	20.9541	21.0033	21.4551	21.0795	21.2982	21.0864	21.6509	NA	1.22197	0.191292	-0.374214		-2.01514	P23526	36	Adenosylhomocysteinase	AHCY
16.7367	16.9022	17.8011	11.6903	17.2534	17.4208	17.0237	17.5846	16.9749	17.3752	18.3054	18.1083	17.8943	17.3391	18.0231	17.1971	17.1853	17.3495	17.4594	TISSUE SPECIFICITY: Expressed in dendritic cells. {ECO:0000269|PubMed:11904675}.	0.96197	0.272457	-1.02501		-1.69067	O43865	12	S-adenosylhomocysteine hydrolase-like protein 1	AHCYL1
13.0723	12.3266	13.2641	13.4009	12.2227	12.7243	12.8027	11.9798	13.4855	12.439	12.4515	12.9005	11.4521	12.2735	12.614	11.2368	11.9262	13.8877	14.4641	NA	NaN	1	0		NaN	C9JZV7	1	Adenosylhomocysteinase 3 (Fragment)	AHCYL2
13.405	11.9204	11.5066	13.8545	12.3625	15.2784	12.5486	14.4862	13.2504	12.1912	13.0243	13.0941	13.3583	12.3105	12.552	12.3421	14.4654	13.5925	14.0151	NA	NaN	1	0		NaN	Q5TGY3	2	AT-hook DNA-binding motif-containing protein 1	AHDC1
21.3935	20.4961	20.4695	21.422	21.6056	20.3181	22.0043	21.2006	21.2677	20.8208	21.0674	21.3628	20.7913	20.8759	21.0533	20.0039	19.7673	20.1536	21.0851	NA	0.96864	0.270055	0.432675		1.69929	Q09666	429	Neuroblast differentiation-associated protein AHNAK	AHNAK
19.6127	17.5675	17.4468	17.5596	19.6948	18.4398	18.668	20.4317	17.1372	18.1298	18.5618	20.2291	18.6091	19.4387	19.9526	16.3099	17.0933	16.2414	20.0631	NA	0.0244057	0.968174	0.0435681		0.0695624	Q8IVF2	82	Protein AHNAK2	AHNAK2
14.3731	15.5793	13.5848	15.2241	14.8296	14.4384	15.1209	14.1529	14.276	14.8556	13.6538	12.7858	14.1105	13.9418	12.2516	13.2751	13.1707	14.2526	15.2066	NA;TISSUE SPECIFICITY: Expressed in all tissues tested including blood, brain, heart, kidney, liver, lung, pancreas and skeletal muscle. Expressed in retinal photoreceptors (PubMed:29726989). {ECO:0000269|PubMed:29726989, ECO:0000269|PubMed:7515333, ECO:0000269|PubMed:8246913}.	1.54872	0.122295	0.869477	+	2.39753	A0A1B0GVI7;A0A2R8Y7G1;P35869	6	Uncharacterized protein (Fragment);Aryl hydrocarbon receptor;Aryl hydrocarbon receptor	AHR
19.0594	19.2725	18.7323	20.2685	18.6128	18.782	19.231	18.4514	19.2778	18.4559	18.6711	18.824	18.9012	18.2689	18.6017	19.2482	19.5139	18.6828	20.0918	TISSUE SPECIFICITY: Expressed in numerous tissues, including brain, heart, skeletal muscle and kidney and, at lower levels, liver and placenta. {ECO:0000269|PubMed:11554768}.	0.255444	0.729856	0.150474		0.601665	O95433	25	Activator of 90 kDa heat shock protein ATPase homolog 1	AHSA1
17.0523	17.861	18.6237	19.4126	17.2237	16.6196	15.4184	19.6862	12.8886	19.0872	19.6983	19.9733	19.584	18.7122	19.9296	17.521	16.3722	18.6912	17.0997	TISSUE SPECIFICITY: Synthesized in liver and selectively concentrated in bone matrix. Secreted in plasma. It is also found in dentin in much higher quantities than other plasma proteins.	1.09702	0.225595	-1.46844		-1.86201	P02765	13	Alpha-2-HS-glycoprotein	AHSG
11.8928	14.1715	16.0736	12.9935	12.0266	15.3307	13.3948	11.7118	13.2891	15.7581	15.8234	17.7951	15.6844	15.6069	17.2559	16.5927	14.8537	15.3875	11.73	TISSUE SPECIFICITY: Expressed in blood and bone marrow. {ECO:0000269|PubMed:11231637, ECO:0000269|PubMed:12066189}.	2.13114	0.0570939	-2.21716	+	-3.04012	Q9NZD4	6	Alpha-hemoglobin-stabilizing protein	AHSP
16.1781	15.4249	16.0864	16.7325	17.4716	16.1781	15.9418	16.7623	14.2365	17.0271	16.4792	16.569	16.0829	16.6549	16.6725	15.5521	15.3776	15.2399	15.3949	TISSUE SPECIFICITY: Widely expressed in adult tissues, with highest expression in the heart and skeletal muscle. {ECO:0000269|PubMed:17681137}.	0.00709304	0.990184	0.00747672		0.0206054	Q96BJ3	12	Axin interactor, dorsalization-associated protein	AIDA
18.9641	17.5665	17.645	19.1707	19.1116	17.6735	19.6225	18.933	19.4662	17.7635	18.4535	18.6756	17.9706	18.0466	17.7068	17.7117	16.9801	18.0322	18.0496	NA;TISSUE SPECIFICITY: Detected in T-lymphocytes and peripheral blood mononuclear cells. {ECO:0000269|PubMed:16049345}.	1.61568	0.112099	0.744658	+	2.47343	P55008;Q5STX8	10	Allograft inflammatory factor 1;Allograft inflammatory factor 1 (Fragment)	AIF1
14.7605	15.4516	16.296	15.788	15.4058	15.2662	14.5735	16.1244	15.7749	12.9767	15.7207	12.0677	15.4078	14.9961	16.1515	14.2786	16.0821	14.4165	15.1569	NA	0.889248	0.304043	0.767973		1.59538	Q9BQI0;Q9BQI0-2;Q9BQI0-3	3	Allograft inflammatory factor 1-like;Isoform 2 of Allograft inflammatory factor 1-like;Isoform 3 of Allograft inflammatory factor 1-like	AIF1L
19.0963	18.8904	18.9024	20.2342	18.7057	18.5961	19.7526	18.3646	20.4341	19.475	19.9198	19.2348	19.0438	19.9802	19.5218	18.5325	19.3323	19.0216	20.1043	TISSUE SPECIFICITY: [Isoform 3]: Brain specific. {ECO:0000269|PubMed:20111043}.;TISSUE SPECIFICITY: [Isoform 4]: Expressed in all tested tissues except brain. {ECO:0000269|PubMed:16644725}.;TISSUE SPECIFICITY: [Isoform 5]: Isoform 5 is frequently down-regulated in human cancers. {ECO:0000269|PubMed:16365034}.;TISSUE SPECIFICITY: Expressed in all tested tissues (PubMed:16644725). Detected in muscl…	0.301285	0.688273	-0.197019		-0.689673	O95831;O95831-3	42	Apoptosis-inducing factor 1, mitochondrial;Isoform 3 of Apoptosis-inducing factor 1, mitochondrial	AIFM1
16.086	15.4323	14.3178	15.4492	16.0993	16.8106	16.3099	13.0579	15.7477	13.3849	14.7106	13.424	11.8041	12.9585	12.7708	14.8534	13.6987	13.9134	17.0648	TISSUE SPECIFICITY: Detected in most normal tissues as two transcripts of 1.8 and 4.0 kb in length, respectively. Highly expressed in heart, moderately in liver and skeletal muscles, and expressed at low levels in placenta, lung, kidney, and pancreas. Both transcripts expressed following p53/TP53 induction. The shorter 1.8 kb transcript seems to be the major transcript in EB1 colon cancer cells. …	1.81296	0.084968	1.62065	+	2.69348	Q9BRQ8;Q9BRQ8-2	3	Ferroptosis suppressor protein 1;Isoform 2 of Ferroptosis suppressor protein 1	AIFM2
11.0339	12.9122	17.3363	13.6136	18.3681	18.1902	18.3897	10.8089	19.2628	12.729	12.8982	11.682	12.4325	11.5056	11.8881	16.3547	17.0855	16.3502	12.7661	NA;TISSUE SPECIFICITY: Highly expressed in heart, ovary, testis, liver, and kidney, at lower levels in spleen, prostate, brain, skeletal muscle, pancreas, small intestine and colon, and undetected in peripheral blood leukocytes, thymus, lung and placenta. AIG1 expression is higher in hair follicles from males than from females. {ECO:0000269|PubMed:11266118}.	NaN	1	0		NaN	A0A2R8YCJ8;Q5T2H3;Q5THU2;Q9NVV5;Q9NVV5-2;Q9NVV5-3;Q9NVV5-5;Q9NVV5-6	1	Androgen-induced gene 1 protein;Androgen-induced gene 1 protein (Fragment);Androgen-induced gene 1 protein;Androgen-induced gene 1 protein;Isoform 2 of Androgen-induced gene 1 protein;Isoform 3 of Androgen-induced gene 1 protein;Isoform 5 of Androgen-induced gene 1 protein;Isoform 6 of Androgen-induced gene 1 protein	AIG1
19.1553	18.8673	18.7795	19.0098	17.8892	18.5029	19.6802	18.4451	18.682	19.0306	19.3818	18.4705	18.7324	19.194	18.6871	18.6333	18.3253	18.5735	19.489	NA	0.137299	0.845669	-0.0726964		-0.352284	Q12904;Q12904-2	23	Aminoacyl tRNA synthase complex-interacting multifunctional protein 1;Isoform 2 of Aminoacyl tRNA synthase complex-interacting multifunctional protein 1	AIMP1
17.0359	17.4111	16.961	18.2923	16.3446	17.2785	17.4135	16.2659	17.5087	17.5553	17.4629	16.9455	17.4203	17.1389	16.9103	16.9738	16.4224	16.3469	17.8197	NA	0.102484	0.883042	0.0683318		0.27081	Q13155	13	Aminoacyl tRNA synthase complex-interacting multifunctional protein 2	AIMP2
17.2299	17.2755	17.4602	18.4137	17.6678	17.1618	18.1518	18.1	18.8831	17.9688	18.1587	17.3574	18.6265	18.0601	17.6525	17.4646	16.9139	17.0753	18.5486	TISSUE SPECIFICITY: Widely expressed. Higher levels seen in the heart, placenta and skeletal muscle. Not expressed in the liver.	0.0437066	0.946492	0.0333465		0.122089	O00170	19	AH receptor-interacting protein	AIP
13.1518	14.863	12.3326	13.9664	11.3483	13.3879	13.8193	11.5076	12.9158	15.6542	12.1495	12.6066	11.7431	12.5234	12.7942	8.55646	14.1211	11.6681	12.8046	NA	0.365077	0.631426	0.57039		0.805878	Q96IF1	6	LIM domain-containing protein ajuba	AJUBA
17.408	17.6305	16.6042	17.418	16.6866	16.2939	17.1669	17.3422	15.9385	17.0285	17.0649	18.6338	17.5769	17.8631	18.4848	17.4325	15.1906	15.8257	16.5671	NA	0.22818	0.753168	-0.223582		-0.547254	P00568;Q5T9B7	20	Adenylate kinase isoenzyme 1	AK1
21.1546	19.86	19.9206	20.4401	20.0954	20.1354	21.242	19.5116	21.0679	20.0006	20.3483	19.5911	19.5456	20.0338	19.7556	19.6853	19.9935	19.9535	20.6089	NA;TISSUE SPECIFICITY: Present in most tissues. Present at high level in heart, liver and kidney, and at low level in brain, skeletal muscle and skin. Present in thrombocytes but not in erythrocytes, which lack mitochondria. Present in all nucleated cell populations from blood, while AK1 is mostly absent. In spleen and lymph nodes, mononuclear cells lack AK1, whereas AK2 is readily detectable. Th…	1.11084	0.221509	0.429207		1.87918	F8W1A4;P54819;P54819-2	32	Adenylate kinase 2, mitochondrial;Adenylate kinase 2, mitochondrial;Isoform 2 of Adenylate kinase 2, mitochondrial	AK2
20.7684	20.1202	20.4181	21.4731	20.8407	20.9009	21.7758	19.9255	20.5739	20.8633	20.8293	20.3515	19.9189	21.3343	20.5358	20.0854	20.7108	20.2702	21.0721	TISSUE SPECIFICITY: Highly expressed in heart, skeletal muscle and liver, moderately expressed in pancreas and kidney, and weakly expressed in placenta, brain and lung. {ECO:0000269|PubMed:11485571}.	0.285309	0.70136	0.158017		0.659466	Q9UIJ7	19	GTP:AMP phosphotransferase AK3, mitochondrial	AK3
18.9356	18.772	18.1582	18.854	17.6412	18.5468	18.5847	16.869	18.0743	15.5763	18.5254	19.5618	18.0048	19.1488	18.5745	18.0102	18.1117	16.535	18.3755	TISSUE SPECIFICITY: Highly expressed in kidney, moderately expressed in heart and liver and weakly expressed in brain. {ECO:0000269|PubMed:11485571}.	0.2099	0.772135	0.228256		0.509812	P27144	11	Adenylate kinase 4, mitochondrial	AK4
15.0122	16.485	14.7692	18.1647	14.2106	16.078	16.3136	14.6174	17.7563	16.2009	15.3687	15.0074	15.3248	15.6153	15.3321	15.6541	16.9938	14.902	17.2485	TISSUE SPECIFICITY: Isoform 1 is detected in thymus, prostate, testis, ovary, colon and small intestine (PubMed:8769136). Isoform 2 is highly expressed in testis and detected at much lower levels in kidney, pancreas, liver, lung and brain (PubMed:7499250). {ECO:0000269|PubMed:7499250, ECO:0000269|PubMed:8769136}.	0.126722	0.856357	0.169346		0.327987	Q92667	16	A-kinase anchor protein 1, mitochondrial	AKAP1
15.949	15.1414	14.206	14.3181	10.1612	13.4985	13.307	14.4598	12.7574	16.1341	14.3634	15.9021	15.5873	11.6904	16.0657	14.305	14.0347	13.7543	12.6805	NA	0.456408	0.558457	-0.696368		-0.961833	O43572	6	A-kinase anchor protein 10, mitochondrial	AKAP10
12.3064	12.6207	12.35	13.8632	12.9914	12.4813	13.7741	13.615	13.9814	14.4894	12.0192	12.8262	11.2545	14.1289	13.2472	14.9076	12.3888	12.727	11.7146	TISSUE SPECIFICITY: Expressed in heart, brain, lung, liver, kidney, testis and ovary. Weakly expressed in skeletal muscle, pancreas and spleen.	NaN	1	0		NaN	Q9UKA4	4	A-kinase anchor protein 11	AKAP11
19.3803	17.3852	18.1619	17.6554	19.3804	17.6968	18.9197	20.0157	17.9713	18.3665	18.6973	19.9701	19.037	18.9967	19.3346	16.157	17.1241	17.8012	17.772	TISSUE SPECIFICITY: Expressed in endothelial cells, cultured fibroblasts and osteosarcoma, but not in platelets, leukocytes, monocytic cell lines or peripherical blood cells.	0.148918	0.832289	0.181759		0.378545	Q02952;Q02952-2;Q02952-3	96	A-kinase anchor protein 12;Isoform 2 of A-kinase anchor protein 12;Isoform 3 of A-kinase anchor protein 12	AKAP12
12.997	13.9232	14.5508	17.0924	13.5493	15.3112	16.8427	15.002	16.8482	15.0156	14.8413	15.3788	14.4373	15.5545	13.4616	14.5557	15.1178	13.3255	16.8086	TISSUE SPECIFICITY: Widely expressed. Found in heart, brain, lung, liver, skeletal muscle, kidney and pancreas. Expressed in activated B-cells and placenta. Expressed in all cell lines tested including Jurkat-TAg, U-937 and HEK293 cells. {ECO:0000269|PubMed:19840947}.	0.189315	0.790808	0.274413		0.466653	Q02040	12	A-kinase anchor protein 17A	AKAP17A
18.1743	17.7074	15.7649	19.5499	18.0737	17.0678	18.4266	18.013	18.1523	17.9015	17.1003	17.8135	17.9681	18.1425	17.4463	16.1805	16.6185	16.6163	18.1723	NA	0.607938	0.453507	0.485127		1.19989	Q9Y2D5-6	41	Isoform 4 of A-kinase anchor protein 2	AKAP2
15.9668	17.0757	15.6765	16.02	15.396	16.5163	17.1946	15.6259	18.0654	16.0714	15.2197	13.649	15.4433	15.8446	15.622	15.2159	15.7699	15.4205	15.4403	TISSUE SPECIFICITY: Highly expressed in heart, liver, skeletal muscle, kidney and pancreas. Expressed in mature dendritic cells. {ECO:0000269|PubMed:19277197}.	1.96626	0.0686832	1.02335	+	2.86153	O43823	24	A-kinase anchor protein 8	AKAP8
15.4529	16.5697	13.1137	17.3346	15.3916	15.8406	16.6075	15.9564	17.3753	15.6527	15.1671	14.4929	14.9795	15.7134	15.3359	16.2042	16.7598	14.8998	16.7272	TISSUE SPECIFICITY: Ubiquitously expressed. Expressed in the brain cortex (at protein level). {ECO:0000269|PubMed:10697960, ECO:0000269|PubMed:16391387}.	0.339944	0.653029	0.366998		0.760892	Q9ULX6	16	A-kinase anchor protein 8-like	AKAP8L
14.8299	14.9467	15.1606	15.8481	15.0002	14.9956	15.8825	14.9062	15.8259	15.2852	16.0197	14.7981	15.0477	14.9659	14.8356	14.9031	14.9618	15.1138	15.7007	TISSUE SPECIFICITY: Widely expressed (PubMed:10202149). Isoform 4: Highly expressed in skeletal muscle and in pancreas (PubMed:9482789). {ECO:0000269|PubMed:10202149, ECO:0000269|PubMed:9482789}.	0.219416	0.761599	0.103028		0.529403	Q99996	89	A-kinase anchor protein 9	AKAP9
17.8611	18.6862	18.9999	19.3474	17.76	18.4527	18.4588	18.5654	18.3705	19.1179	20.2822	19.5667	18.8772	18.877	18.9729	19.1296	18.1442	19.0281	18.3463	TISSUE SPECIFICITY: Widely expressed. Highly expressed in kidney, salivary gland and liver. Detected in trachea, stomach, brain, lung, prostate, placenta, mammary gland, small intestine and lung. {ECO:0000269|PubMed:10486210, ECO:0000269|PubMed:10510318, ECO:0000269|PubMed:11306097}.	1.30097	0.169549	-0.533994	+	-2.10975	P14550	18	Aldo-keto reductase family 1 member A1	AKR1A1
20.7057	19.6775	21.12	20.4745	19.3185	19.8011	20.7696	20.8204	20.9225	20.7116	21.9511	21.9199	21.0537	20.8824	21.3327	20.6167	18.8045	20.6459	20.5065	TISSUE SPECIFICITY: Highly expressed in embryonic epithelial cells (EUE) in response to osmotic stress. {ECO:0000269|PubMed:8435445}.	0.630818	0.437878	-0.441415		-1.23403	P15121	19	Aldo-keto reductase family 1 member B1	AKR1B1
19.0429	19.433	18.3068	17.7592	19.1849	17.8367	17.8976	15.8055	18.8392	17.2284	19.1027	16.7601	18.3717	18.2507	19.432	17.7586	15.4404	19.7226	18.9438	TISSUE SPECIFICITY: Found in many tissues. Highly expressed in small intestine, colon and adrenal gland. {ECO:0000269|PubMed:9565553}.	0.0878058	0.902588	0.132882		0.23509	O60218	19	Aldo-keto reductase family 1 member B10	AKR1B10
18.2495	19.2531	19.5005	20.1969	15.4077	17.0132	17.4081	18.4777	13.532	17.3037	19.2523	18.6249	18.0567	19.4353	19.0636	18.1844	17.4694	20.5357	21.4544	TISSUE SPECIFICITY: Expressed in all tissues tested including liver, prostate, testis, adrenal gland, brain, uterus, mammary gland and keratinocytes. Highest levels found in liver, mammary gland and brain. {ECO:0000269|PubMed:10998348, ECO:0000269|PubMed:11013348}.	0.88112	0.307418	-1.26707		-1.58458	Q04828	16	Aldo-keto reductase family 1 member C1	AKR1C1
11.7159	12.978	16.804	12.5308	12.1357	13.6678	12.4945	14.9432	12.6769	15.1129	14.0313	13.5957	14.3281	15.9254	17.1016	11.9954	10.7301	14.8632	14.5929	NA	0.564002	0.481897	-0.900249		-1.13311	B4DK69	2	Aldo-keto reductase family 1 member C2	AKR1C2
16.1057	16.7236	17.7475	17.8937	12.6856	14.5847	19.598	15.7504	17.9796	15.9705	17.8552	16.7221	16.9418	18.3011	16.9202	15.7835	15.0683	17.3869	18.2911	NA;TISSUE SPECIFICITY: Expressed in many tissues including adrenal gland, brain, kidney, liver, lung, mammary gland, placenta, small intestine, colon, spleen, prostate and testis. High expression in prostate and mammary gland. In the prostate, higher levels in epithelial cells than in stromal cells. In the brain, expressed in medulla, spinal cord, frontotemporal lobes, thalamus, subthalamic nucle…	0.197496	0.782929	-0.360864		-0.483937	A0A0A0MSS8;P42330	11	Aldo-keto reductase family 1 member C3	AKR1C3
18.2562	17.5228	19.5069	19.0366	17.7801	17.9232	19.8474	18.7426	19.35	17.9435	19.312	18.9042	18.452	18.5072	18.3949	17.9377	18.2276	19.0255	20.612	TISSUE SPECIFICITY: Detected in brain, liver, small intestine and testis, and at lower levels in heart, prostate, skeletal muscle and spleen. Detected in kidney proximal and distal tubules, endothelial cells lining the Bowman's capsules and some cysts. Detected at low levels in lung and pancreas (at protein level). Widely expressed. {ECO:0000269|PubMed:10510318, ECO:0000269|PubMed:9576847}.	0.0674127	0.9218	-0.0687928		-0.183957	O43488	16	Aflatoxin B1 aldehyde reductase member 2	AKR7A2
18.9351	16.4162	18.5278	18.9561	13.7936	17.7233	16.5414	15.011	15.0443	16.8236	18.3302	16.4644	17.102	16.5647	17.3236	18.0385	16.9667	18.937	20.0009	TISSUE SPECIFICITY: Expressed in colon, kidney, liver, pancreas, adenocarcinoma and endometrium. {ECO:0000269|PubMed:12879023, ECO:0000269|PubMed:18416522}.	0.638258	0.434848	-0.883079		-1.24504	O95154	22	Aflatoxin B1 aldehyde reductase member 3	AKR7A3
16.7036	16.6101	16.1713	16.7847	16.526	16.6575	17.8815	16.896	17.492	17.1588	16.6113	16.8345	16.5846	16.5205	16.8993	16.0401	16.0824	16.0381	17.2391	TISSUE SPECIFICITY: Expressed in prostate cancer and levels increase from the normal to the malignant state (at protein level). Expressed in all human cell types so far analyzed. The Tyr-176 phosphorylated form shows a significant increase in expression in breast cancers during the progressive stages i.e. normal to hyperplasia (ADH), ductal carcinoma in situ (DCIS), invasive ductal carcinoma (IDC…	0.584163	0.46806	0.257225		1.16396	P31749	15	RAC-alpha serine/threonine-protein kinase	AKT1
15.4687	16.5091	14.4717	12.7444	11.827	16.2594	15.3334	14.7763	15.0977	15.4343	12.9834	12.7005	12.3959	-0.268754	11.9147	14.2495	15.4801	14.8907	15.4471	TISSUE SPECIFICITY: Widely expressed with highest levels of expression in liver and heart. Expressed at higher levels in cancer cell lines (e.g. A-549 and HeLa) than in normal cell lines (e.g. HEK293). {ECO:0000269|PubMed:12524439, ECO:0000269|PubMed:16174443}.	0.701612	0.397102	2.19811		1.33716	Q96B36;Q96B36-3	3	Proline-rich AKT1 substrate 1;Isoform 3 of Proline-rich AKT1 substrate 1	AKT1S1
14.4159	14.603	13.9708	14.8714	14.9533	14.9053	15.4954	14.9418	15.8602	15.1536	14.814	14.9567	15.3255	15.2826	14.6637	14.0521	14.3477	13.9141	14.6112	TISSUE SPECIFICITY: Expressed in all cell types so far analyzed.	0.33029	0.661508	0.178666		0.743344	P31751;P31751-2	7	RAC-beta serine/threonine-protein kinase;Isoform 2 of RAC-beta serine/threonine-protein kinase	AKT2
16.0429	14.457	12.9919	13.0511	16.168	13.835	14.3267	15.5208	14.5609	15.9657	15.2296	12.9947	12.6826	15.6047	16.1768	12.6403	9.87581	13.5029	11.7063	NA;TISSUE SPECIFICITY: In adult tissues, it is highly expressed in brain, lung and kidney, but weakly in heart, testis and liver. In fetal tissues, it is highly expressed in heart, liver and brain and not at all in kidney.	0.583944	0.468184	0.912539		1.16362	A0A5F9ZHU3;A0A5K1VW74;Q9Y243;Q9Y243-2	6	Non-specific serine/threonine protein kinase;Non-specific serine/threonine protein kinase;RAC-gamma serine/threonine-protein kinase;Isoform 2 of RAC-gamma serine/threonine-protein kinase	AKT3
14.9627	15.3682	13.9092	14.2072	12.5797	13.7597	11.9908	14.5057	14.5925	14.3016	14.1662	14.9353	14.1226	13.6632	14.7746	14.7233	12.4137	13.9239	13.9586	NA	0.100739	0.885327	-0.112108		-0.266607	Q9H8T0;Q9H8T0-2	4	AKT-interacting protein;Isoform 2 of AKT-interacting protein	AKTIP
16.7835	17.2679	18.4259	17.8375	17.811	17.1866	17.7563	17.375	18.0334	16.605	17.0227	17.6974	17.1789	17.0248	17.6858	18.0324	16.2102	16.7497	17.3794	NA	1.08418	0.229024	0.449932		1.846	P13716	31	Delta-aminolevulinic acid dehydratase	ALAD
15.3069	15.8862	13.6678	12.6846	15.0707	15.5326	15.8264	12.5275	16.1508	12.2751	11.3116	11.8771	11.9689	17.9252	14.6293	14.3203	14.077	14.0678	15.2407	NA	0.616053	0.448705	0.969951		1.21204	P13196	6	5-aminolevulinate synthase, nonspecific, mitochondrial	ALAS1
21.873	21.4799	21.1748	26.9344	21.3414	23.0168	22.6742	22.7781	20.1682	22.3638	22.7716	25.1202	23.9292	21.4794	25.225	22.6355	19.6839	22.1319	23.0992	NA	0.234794	0.745675	-0.461672		-0.560607	A0A087WWT3	8	Serum albumin	ALB
15.1771	15.8461	15.4472	16.0724	16.0677	16.1234	14.6848	15.6323	14.4873	16.0251	15.9813	15.4626	14.2426	14.8438	14.9871	15.5374	14.5951	13.9879	14.144	NA;TISSUE SPECIFICITY: Detected on hematopoietic stem cells derived from umbilical cord blood (PubMed:24740813). Detected on lymph vessel endothelial cells, skin and tonsil (PubMed:23169771). Detected on peripheral blood monocytes (PubMed:15048703). Detected on monocyte-derived dendritic cells (at protein level) (PubMed:16352806). Detected at low levels in spleen, placenta, liver (PubMed:9502422)…	0.938839	0.280812	0.523562		1.66061	F5GXJ9;Q13740;Q13740-2	13	CD166 antigen;CD166 antigen;Isoform 2 of CD166 antigen	ALCAM
17.9325	18.198	18.5954	17.8203	17.9492	18.4576	18.2664	18.7258	18.9619	18.0002	18.4629	18.3463	18.6456	17.5498	18.456	18.4174	17.8477	18.5072	18.3765	NA	0.143743	0.83803	0.0620539		0.366903	Q8IZ83	24	Aldehyde dehydrogenase family 16 member A1	ALDH16A1
19.2552	18.0806	18.2112	19.8648	18.3921	18.7478	18.5289	17.4441	19.5838	19.5036	19.2689	17.8635	18.2867	18.9694	18.7093	19.0357	18.9647	18.9754	19.978	NA	0.40921	0.595864	-0.276795		-0.882617	P54886;P54886-2	43	Delta-1-pyrroline-5-carboxylate synthase;Isoform Short of Delta-1-pyrroline-5-carboxylate synthase	ALDH18A1
21.7029	20.3892	21.3111	19.92	20.5498	20.7124	20.2309	22.2696	21.3612	19.0875	21.0227	22.5855	20.6274	21.0812	21.998	20.4703	19.9229	21.3234	21.1625	NA	0.00875903	0.988278	0.0104178		0.0253976	P00352	40	Retinal dehydrogenase 1	ALDH1A1
22.2404	11.6723	20.8215	20.6491	18.9883	12.3973	18.4527	21.9737	22.0467	12.5641	16.5816	13.2414	17.8521	12.1339	12.8663	20.0067	23.292	11.1704	11.8775	NA	1.16609	0.205165	3.64608		1.94723	H0YMG7;O94788;O94788-2;O94788-3	2	Retinal dehydrogenase 2;Retinal dehydrogenase 2;Isoform 2 of Retinal dehydrogenase 2;Isoform 3 of Retinal dehydrogenase 2	ALDH1A2
17.9217	16.5284	15.3943	15.8203	17.5888	14.9435	16.98	17.5403	15.7588	16.6369	17.0629	15.5647	16.3191	16.2937	13.6031	15.9311	15.3247	16.442	15.9638	NA	0.644215	0.431953	0.583144		1.25383	H0Y2X5	12	Aldehyde dehydrogenase 1 family, member A3, isoform CRA_b	ALDH1A3
20.6784	19.2945	18.7689	20.8673	19.4335	19.0861	21.0752	19.0184	19.7254	17.9357	18.3855	18.2971	19.2262	20.0288	18.3549	18.6161	20.788	18.0498	19.0552	TISSUE SPECIFICITY: Liver, testis and to a lesser extent in brain.	1.35648	0.156095	0.898229	+	2.17532	P30837	44	Aldehyde dehydrogenase X, mitochondrial	ALDH1B1
16.3095	15.4901	16.3581	18.2439	16.9868	16.0663	14.0886	15.4506	17.5002	16.3072	17.411	15.7786	15.7507	15.0676	16.1665	16.3129	14.8724	18.1585	20.0067	TISSUE SPECIFICITY: Highly expressed in liver, pancreas and kidney. {ECO:0000269|PubMed:20498374}.	0.192082	0.788564	-0.306071		-0.472519	O75891;O75891-3	30	Cytosolic 10-formyltetrahydrofolate dehydrogenase;Isoform 3 of Cytosolic 10-formyltetrahydrofolate dehydrogenase	ALDH1L1
16.3663	13.8887	16.6127	17.2899	18.2026	16.3802	17.9745	16.38	18.7541	17.4888	16.535	16.5752	16.5774	16.492	16.8302	14.9067	15.7039	17.0537	17.5935	NA;TISSUE SPECIFICITY: Highly expressed in pancreas, heart, brain and skeletal muscle. {ECO:0000269|PubMed:20498374}.	0.237253	0.74313	0.296459		0.565546	A0A494C1M4;Q3SY69	18	10-formyltetrahydrofolate dehydrogenase;Mitochondrial 10-formyltetrahydrofolate dehydrogenase	ALDH1L2
21.7507	21.652	20.908	21.6953	19.9489	21.7687	22.2554	20.6102	22.1981	21.0572	21.3708	21.0724	20.4641	21.2049	21.2084	21.0641	22.0244	21.4528	22.4666	NA	0.101702	0.884016	0.0822246		0.268929	P05091	39	Aldehyde dehydrogenase, mitochondrial	ALDH2
11.8972	13.9885	14.5138	13.0807	11.984	13.4558	13.8636	11.165	12.8205	14.8889	12.7096	12.8901	13.3135	14.3263	13.5679	15.0063	14.2723	14.4449	12.8448	low level in the liver and kidney.;NA;TISSUE SPECIFICITY: High levels in stomach, esophagus and lung	NaN	1	0		NaN	C9JMC5;E9PNN6;I3L3I9;P30838	5	Aldehyde dehydrogenase, dimeric NADP-preferring (Fragment);Aldehyde dehydrogenase, dimeric NADP-preferring;Aldehyde dehydrogenase, dimeric NADP-preferring;Aldehyde dehydrogenase, dimeric NADP-preferring	ALDH3A1
16.3847	16.0205	17.5409	19.3315	16.6299	17.2862	17.8684	17.2829	18.7861	17.4128	17.3789	17.6419	17.0743	18.0267	18.0903	17.3715	17.385	17.3957	18.7486	NA;TISSUE SPECIFICITY: Detected in liver (at protein level). {ECO:0000269|PubMed:9133646}.	0.209671	0.772426	-0.193563		-0.50934	A0A5F9ZHN9;P51648;P51648-2	17	Aldehyde dehydrogenase;Aldehyde dehydrogenase family 3 member A2;Isoform 2 of Aldehyde dehydrogenase family 3 member A2	ALDH3A2
13.551	13.9435	16.2312	15.3029	15.461	13.8788	14.2589	13.4985	14.4766	17.3085	11.9368	13.9406	15.9884	11.8343	13.103	13.0716	13.1024	14.6796	15.1714	TISSUE SPECIFICITY: Highest expression in kidney and lung.	0.334446	0.658321	0.497717		0.750917	P43353	9	Aldehyde dehydrogenase family 3 member B1	ALDH3B1
17.9209	16.9428	16.8884	18.5134	17.5353	18.6148	20.4272	16.102	18.1299	18.0574	16.6664	17.5676	17.602	18.9395	18.0603	16.1997	18.7452	17.1798	18.808	TISSUE SPECIFICITY: Highest expression is found in liver followed by skeletal muscle, kidney, heart, brain, placenta, lung and pancreas.	0.0850408	0.904017	0.114595		0.228262	P30038	25	Delta-1-pyrroline-5-carboxylate dehydrogenase, mitochondrial	ALDH4A1
17.385	17.3603	18.0908	19.5602	15.1661	17.3084	17.5017	16.5804	18.6391	15.6388	18.2886	16.5055	16.9673	16.605	16.8346	17.129	17.6184	17.1145	18.7771	TISSUE SPECIFICITY: Brain, pancreas, heart, liver, skeletal muscle and kidney. Lower in placenta.	0.325972	0.664832	0.362335		0.735447	P51649;P51649-2	12	Succinate-semialdehyde dehydrogenase, mitochondrial;Isoform 2 of Succinate-semialdehyde dehydrogenase, mitochondrial	ALDH5A1
18.9302	17.2189	19.9583	18.7796	17.8226	17.9643	19.2082	17.7789	19.6646	18.1245	21.0433	19.8386	19.0209	19.3877	20.0803	18.4995	20.4157	19.1129	20.6788	NA	1.51665	0.128543	-1.02846	+	-2.36093	Q02252;Q02252-2	35	Methylmalonate-semialdehyde dehydrogenase [acylating], mitochondrial;Isoform 2 of Methylmalonate-semialdehyde dehydrogenase [acylating], mitochondrial	ALDH6A1
18.2029	18.569	18.9152	20.2282	18.6873	18.9215	19.0339	17.6635	18.5149	19.6871	19.5205	18.812	18.4194	18.7218	19.3228	18.0053	19.7354	18.8659	19.703	TISSUE SPECIFICITY: Abundant in hepatoma cells and fetal cochlea, ovary, eye, heart, adrenal gland, liver and kidney. Low levels present in adult peripheral blood leukocytes and fetal brain, thymus, spleen, skeletal muscle, lung and tongue. {ECO:0000269|PubMed:8088832, ECO:0000269|PubMed:9417906}.	0.548201	0.492063	-0.330835		-1.10868	P49419-2	31	Isoform 2 of Alpha-aminoadipic semialdehyde dehydrogenase	ALDH7A1
19.5706	19.5383	20.7444	20.0125	19.1892	19.288	18.1904	19.438	18.4933	19.5399	20.4549	20.0142	19.7103	19.7728	20.0453	19.7513	20.1408	20.0802	19.9844	TISSUE SPECIFICITY: Detected in brain (at protein level) (PubMed:8645224). High expression in adult liver, skeletal muscle, and kidney. Low levels in heart, pancreas, lung and brain (PubMed:8786138). Expressed in all regions of the brain. Expression levels are variable in the different brain areas, with the highest levels in the spinal cord and the lowest in the occipital pole. {ECO:0000269|PubMe…	1.39724	0.148014	-0.564457	+	-2.22303	P49189;P49189-3	35	4-trimethylaminobutyraldehyde dehydrogenase;Isoform 3 of 4-trimethylaminobutyraldehyde dehydrogenase	ALDH9A1
20.223	20.4924	20.3087	21.1245	20.271	20.4507	19.0729	19.8042	19.0409	21.0179	20.9038	21.2376	21.2057	20.5588	20.852	20.9599	19.5498	20.4951	21.3538	NA	1.75463	0.0922601	-0.725856	+	-2.62891	P04075	55	Fructose-bisphosphate aldolase A	ALDOA
17.8861	18.9858	18.4364	18.4955	16.8237	16.9642	12.2815	18.1382	19.4702	17.6142	19.2302	14.945	17.4425	16.5663	17.6438	16.9762	16.5646	19.5059	18.4997	NA	0.000381023	0.999351	-0.000905673		-0.00111537	P05062	19	Fructose-bisphosphate aldolase B	ALDOB
17.7968	18.5634	18.2161	21.2742	18.042	18.6891	17.8943	17.5631	17.9629	18.6112	18.5723	18.6311	18.6381	17.9563	18.8594	18.238	18.2886	18.0663	21.6291	NA	0.260275	0.725451	-0.304396		-0.611138	P09972	26	Fructose-bisphosphate aldolase C	ALDOC
16.2039	15.6006	15.1036	17.2414	15.6399	15.5001	16.2479	15.0909	17.4379	14.5998	15.7403	11.736	19.073	15.0758	15.7891	15.2216	15.0388	15.4936	16.2773	NA	0.429902	0.580141	0.602832		0.917689	Q9BT22	12	Chitobiosyldiphosphodolichol beta-mannosyltransferase	ALG1
16.2891	16.7573	16.0086	16.9498	15.9344	17.0877	17.973	15.7125	17.9821	16.5461	15.4588	13.0781	11.7137	15.8869	11.9469	15.9235	14.9868	15.9297	15.7029	NA	2.19204	0.0522892	2.02649	+	3.10564	Q2TAA5	8	GDP-Man:Man(3)GlcNAc(2)-PP-Dol alpha-1,2-mannosyltransferase	ALG11
12.5705	12.672	14.7225	19.9503	14.2475	14.467	12.8571	11.7409	12.4011	16.1283	16.4208	15.7896	15.4222	15.7155	15.9651	15.3922	15.0294	15.7569	20.8006	TISSUE SPECIFICITY: Expressed in fibroblasts.	1.54279	0.123214	-2.28331	+	-2.39078	Q9BV10	1	Dol-P-Man:Man(7)GlcNAc(2)-PP-Dol alpha-1,6-mannosyltransferase	ALG12
15.5162	16.0706	15.107	13.0917	14.8591	14.055	12.8762	14.8208	12.3928	16.5766	16.5015	15.0221	15.5382	15.9305	15.0842	14.7781	14.8158	15.5574	17.7836	NA	1.92431	0.073105	-1.44886	+	-2.81576	Q9NP73-2	6	Isoform 2 of Putative bifunctional UDP-N-acetylglucosamine transferase and deubiquitinase ALG13	ALG13
13.2298	13.1137	13.9171	13.1613	11.9563	14.4442	13.3	12.2876	13.8894	13.4387	13.9562	14.0724	14.0001	13.6517	15.5515	14.6794	14.2393	14.961	12.7236	NA	1.54688	0.122605	-0.87192	+	-2.39544	Q96F25	1	UDP-N-acetylglucosamine transferase subunit ALG14 homolog	ALG14
15.6377	16.6243	16.4422	15.7067	17.6919	16.1792	16.2438	15.9038	16.7437	16.2399	16.0513	15.7444	15.7809	15.4381	16.1985	16.51	15.2423	15.7518	16.1486	NA	1.09228	0.227079	0.442023		1.8561	Q9H553	9	Alpha-1,3/1,6-mannosyltransferase ALG2	ALG2
14.6726	14.9252	11.39	12.3729	15.0913	16.016	16.2528	13.4693	17.1696	15.269	16.366	13.0682	14.7368	15.0814	12.8467	16.3992	11.9903	15.9298	20.8889	NA	0.278416	0.70776	-0.662088		-0.646284	F8WE30;F8WF93;H7BZZ2;H7C0X4;Q92685	1	Dol-P-Man:Man(5)GlcNAc(2)-PP-Dol alpha-1,3-mannosyltransferase;Dol-P-Man:Man(5)GlcNAc(2)-PP-Dol alpha-1,3-mannosyltransferase;Dol-P-Man:Man(5)GlcNAc(2)-PP-Dol alpha-1,3-mannosyltransferase (Fragment);Dol-P-Man:Man(5)GlcNAc(2)-PP-Dol alpha-1,3-mannosyltransferase (Fragment);Dol-P-Man:Man(5)GlcNAc(2)-PP-Dol alpha-1,3-mannosyltransferase	ALG3
14.4593	16.7544	14.9276	16.8043	15.5765	16.5092	14.147	10.6394	14.9047	16.0523	16.7111	13.1653	15.7943	16.2041	14.856	15.6625	12.4546	15.6471	15.3986	TISSUE SPECIFICITY: Expressed in pancreas, placenta, liver, heart, brain, kidney, skeletal muscle, and lung.	0.11456	0.869233	-0.225436		-0.299566	Q9Y673;Q9Y673-2	5	Dolichyl-phosphate beta-glucosyltransferase;Isoform 2 of Dolichyl-phosphate beta-glucosyltransferase	ALG5
11.8402	14.5889	14.384	12.5524	13.1137	15.8727	12.9667	12.9402	1.4329	13.8793	11.5724	11.6094	12.6745	12.5945	14.1314	14.6282	14.7849	15.4633	12.1076	NA	NaN	1	0		NaN	Q9Y672	2	Dolichyl pyrophosphate Man9GlcNAc2 alpha-1,3-glucosyltransferase	ALG6
13.6145	13.2535	12.9141	17.7566	14.0595	13.6358	14.0644	12.5135	14.691	13.3242	15.0184	12.2143	13.4426	12.3734	12.1936	13.4129	12.4383	12.7961	16.2269	NA;TISSUE SPECIFICITY: Ubiquitously expressed;with highest levels in heart, liver and pancreas. {ECO:0000269|PubMed:12030331}.	0.53374	0.503216	0.711817		1.08611	A0A087WZ62;Q9H6U8;Q9H6U8-3	10	Mannosyltransferase;Alpha-1,2-mannosyltransferase ALG9;Isoform 3 of Alpha-1,2-mannosyltransferase ALG9	ALG9
15.0314	16.5971	14.8257	15.7106	15.2353	15.7079	15.4446	13.294	16.2568	12.4199	12.9805	11.3403	14.6105	13.1523	11.7533	15.0459	16.1797	14.4125	13.9242	NA;TISSUE SPECIFICITY: Detected in colon, small intestine, ovary, testis, prostate, skeletal muscle, heart, liver and urinary bladder. {ECO:0000269|PubMed:12486230, ECO:0000269|PubMed:16174769}.	2.07048	0.0605944	1.76291	+	2.97464	F5H5X2;Q6NS38;S4R3T5	2	DNA oxidative demethylase ALKBH2 (Fragment);DNA oxidative demethylase ALKBH2;DNA oxidative demethylase ALKBH2 (Fragment)	ALKBH2
11.4281	12.5	12.2219	15.1934	11.4555	12.9172	12.7286	13.4941	14.2197	12.3521	13.3886	12.1929	13.8626	12.4969	12.8928	12.4136	13.2765	11.1361	14.5422	NA;TISSUE SPECIFICITY: Ubiquitous. Detected in heart, pancreas, skeletal muscle, thymus, testis, ovary, spleen, prostate, small intestine, peripheral blood leukocytes, urinary bladder and colon. {ECO:0000269|PubMed:12486230, ECO:0000269|PubMed:16174769, ECO:0000269|PubMed:17979886}.	NaN	1	0		NaN	E9PN35;Q96Q83	2	Alpha-ketoglutarate-dependent dioxygenase alkB homolog 3	ALKBH3
15.5562	15.7375	14.1988	14.0792	12.6754	15.5046	17.3561	14.7111	17.504	11.6886	11.6696	12.5878	12.9237	12.2226	12.2084	14.2116	13.9105	13.2648	12.5832	TISSUE SPECIFICITY: Widely expressed, with highest expression in pancreas, ovary and spleen. {ECO:0000269|PubMed:17979886}.	3.45823	0.0167912	2.53101	+	4.45436	Q9NXW9	6	Alpha-ketoglutarate-dependent dioxygenase alkB homolog 4	ALKBH4
12.66	11.6993	15.0298	16.5452	14.9837	14.8922	14.3468	15.2683	13.9554	15.4295	14.9226	11.9076	12.6425	14.5329	13.5401	14.6614	15.531	14.9204	19.6418	TISSUE SPECIFICITY: Widely expressed, with highest expression in lung, followed by testis, pancreas, spleen and ovary. {ECO:0000269|PubMed:17979886}.	0.194075	0.786448	-0.397365		-0.47673	Q6P6C2;Q6P6C2-1;Q6P6C2-3	5	RNA demethylase ALKBH5;Isoform 1 of RNA demethylase ALKBH5;Isoform 3 of RNA demethylase ALKBH5	ALKBH5
12.6866	14.7649	15.5779	14.2092	14.2359	14.7464	14.4012	14.2231	13.8309	13.6225	11.3258	12.8062	13.8974	13.8942	16.0028	14.5097	14.5182	13.3573	12.108	TISSUE SPECIFICITY: Widely expressed, with highest expression in pancreas, followed by spleen, prostate, ovary and placenta. {ECO:0000269|PubMed:17979886}.	NaN	1	0		NaN	Q9BT30	4	Alpha-ketoglutarate-dependent dioxygenase alkB homolog 7, mitochondrial	ALKBH7
15.3079	16.0285	15.0962	15.9619	18.1837	17.1832	18.0077	17.4919	18.0299	17.7983	16.5587	16.4684	16.4485	17.0589	16.9191	16.7692	15.0435	16.3561	14.0015	TISSUE SPECIFICITY: Detected in monocytes and eosinophils (at protein level). Expressed in airway epithelial cells. {ECO:0000269|PubMed:21831839, ECO:0000269|PubMed:9414270}.	0.412719	0.592955	0.467894		0.888604	P16050	24	Polyunsaturated fatty acid lipoxygenase ALOX15	ALOX15
16.6515	16.3349	16.7929	17.0472	17.827	16.7853	15.9261	16.4135	17.1867	17.08	17.8753	15.8604	17.8316	16.3115	17.7106	16.2286	15.7115	16.3307	16.9498	NA	0.0162579	0.97904	-0.0151116		-0.0467505	P09917	21	Polyunsaturated fatty acid 5-lipoxygenase	ALOX5
21.6319	19.7448	19.8123	19.7192	21.8803	20.821	21.8598	20.6857	22.7212	17.2404	18.2843	18.4036	18.6122	18.7768	17.5272	19.2041	18.1589	19.8205	19.3243	NA	4.51162	0.00527273	2.45102	+	5.61709	A0A087WW23;P20292	2	Arachidonate 5-lipoxygenase-activating protein	ALOX5AP
14.1634	14.293	14.4297	0.0683299	16.2859	13.8387	16.6839	14.533	18.9532	15.2578	13.0587	11.2399	12.7421	13.385	12.844	14.4142	13.3473	15.1134	12.8845	NA	0.0552696	0.933437	0.265662		0.152611	P05186	10	Alkaline phosphatase, tissue-nonspecific isozyme	ALPL
12.183	12.5523	11.8986	13.8739	13.1781	12.9809	13.5876	11.2473	13.7199	13.2501	12.9152	13.3699	11.1402	11.3006	13.0214	12.0922	11.8201	11.4198	14.1351	TISSUE SPECIFICITY: Expressed in heart and kidney. {ECO:0000269|PubMed:15388334}.	0.361598	0.634956	0.355936		0.799708	Q60I27;Q60I27-2	2	ALS2 C-terminal-like protein;Isoform 2 of ALS2 C-terminal-like protein	ALS2CL
18.3533	19.9767	17.0042	17.903	15.7833	17.9975	19.8492	18.0427	18.9921	17.9612	16.4441	16.8801	16.4168	17.8558	16.6965	17.9177	18.314	16.8415	17.1641	NA	1.22173	0.191314	0.962154		2.01486	E9PB61	17	THO complex subunit 4	ALYREF
11.7433	17.2655	15.3785	12.7283	12.9495	18.6235	15.7824	15.3557	18.2303	17.4237	16.2442	13.0096	12.7927	17.005	17.7005	16.4391	16.3956	15.5418	11.1047	NA	0.00829331	0.98837	-0.0260264		-0.0240597	D6RB81;Q9UHK6;Q9UHK6-5	5	Alpha-methylacyl-CoA racemase;Alpha-methylacyl-CoA racemase;Isoform 4 of Alpha-methylacyl-CoA racemase	AMACR
18.2337	18.4039	18.8046	22.0792	19.6555	18.1976	19.1836	19.0521	16.7959	17.8133	17.9599	18.8853	18.1984	17.5734	18.1714	18.4158	17.3073	18.7323	19.8495	TISSUE SPECIFICITY: Expressed by the liver and secreted in plasma. Alpha-1-microglobulin occurs in many physiological fluids including plasma, urine, and cerebrospinal fluid. Inter-alpha-trypsin inhibitor is present in plasma and urine.	0.64368	0.432162	0.643333		1.25304	P02760	12	Protein AMBP	AMBP
15.8925	15.7741	16.2526	17.4516	16.5812	15.6408	13.6584	15.96	13.0277	16.2149	15.4683	16.2342	15.4868	16.4334	15.776	15.6036	14.4884	16.4691	17.2403	NA	0.313453	0.677021	-0.359417		-0.712367	Q9Y303;Q9Y303-2;Q9Y303-3	9	N-acetylglucosamine-6-phosphate deacetylase;Isoform 2 of N-acetylglucosamine-6-phosphate deacetylase;Isoform 3 of N-acetylglucosamine-6-phosphate deacetylase	AMDHD2
11.155	12.1358	12.692	13.9003	12.9521	12.2462	14.1182	13.0348	13.3862	13.2149	13.2839	12.8587	13.7172	13.1859	14.1105	13.0401	11.643	13.1964	11.9604	TISSUE SPECIFICITY: Detected in fetal and adult kidney, brain and spleen. {ECO:0000269|PubMed:19416806}.	0.184948	0.795201	-0.174352		-0.457353	Q5JTC6;Q5JTC6-2	1	APC membrane recruitment protein 1;Isoform 2 of APC membrane recruitment protein 1	AMER1
12.1548	19.0504	17.8171	20.1016	12.6445	17.9792	13.6325	17.3989	12.7567	18.3139	18.7626	18.064	14.0825	18.305	18.7614	18.2118	18.5973	18.4472	18.6478	NA	1.13168	0.214834	-2.07094		-1.90496	C9JS07	1	APC membrane recruitment protein 3 (Fragment)	AMER3
12.4829	11.2101	10.3859	12.409	11.5366	12.8704	12.584	9.7326	15.2186	12.7102	13.2418	11.8024	13.0821	12.0235	14.5351	12.2122	11.9365	11.1157	12.3476	NA	NaN	1	0		NaN	Q9UKV5	3	E3 ubiquitin-protein ligase AMFR	AMFR
13.174	12.5634	11.6671	13.1518	11.4093	12.3073	13.946	13.6949	12.6297	13.1015	13.6655	13.3927	11.0593	12.8122	13.7051	11.229	9.85026	9.96511	16.8096	NA	0.083024	0.905783	0.16804		0.223262	Q8IY63;Q8IY63-2	5	Angiomotin-like protein 1;Isoform 2 of Angiomotin-like protein 1	AMOTL1
17.4442	17.4672	17.2621	18.7168	17.1721	16.6661	17.339	17.2028	17.4056	16.9599	17.4315	16.7831	16.7989	16.9103	16.6275	16.877	16.4237	16.7735	17.2514	NA;TISSUE SPECIFICITY: Highly expressed in cerebellum. {ECO:0000269|PubMed:23911318}.	1.78017	0.0891587	0.524767	+	2.65723	A0A5F9UK94;H0Y360;Q01433;Q01433-2	24	AMP deaminase;AMP deaminase;AMP deaminase 2;Isoform Ex1A-2-3 of AMP deaminase 2	AMPD2
16.0512	16.4299	15.682	16.2293	16.9757	15.9342	16.5803	16.157	17.1602	16.0188	16.0916	15.4006	16.1454	15.9338	15.947	15.8134	14.8276	15.6971	16.3864	NA	1.63886	0.108409	0.52938	+	2.49955	Q01432;Q01432-4;Q01432-5	20	AMP deaminase 3;Isoform 2 of AMP deaminase 3;Isoform 3 of AMP deaminase 3	AMPD3
14.8264	13.6989	16.1002	14.8614	12.7929	15.9472	14.2488	14.1672	13.1942	11.8592	16.7916	16.0756	15.7074	16.1651	16.3016	14.528	12.7516	14.3661	13.5998	NA	0.247474	0.736249	-0.38826		-0.58593	A0A1B0GVP5;B3KTU4;P48728	8	Aminomethyltransferase;Aminomethyltransferase;Aminomethyltransferase, mitochondrial	AMT
12.0062	13.8508	11.9698	12.607	12.8745	12.5514	16.4105	13.9939	19.7057	13.2465	16.043	16.2203	13.99	15.1704	16.5799	14.5469	15.2161	17.2796	12.1204	NA	0.532751	0.503959	-1.04467		-1.08456	P19961	25	Alpha-amylase 2B	AMY2B
16.0683	17.1796	15.9875	16.9519	17.1166	16.6385	18.6851	16.224	18.4322	16.29	14.9816	15.318	16.1686	15.6839	16.0496	16.0423	16.8997	15.6659	14.9776	NA	2.40241	0.0410982	1.22381	+	3.33067	Q9H1A4	21	Anaphase-promoting complex subunit 1	ANAPC1
15.1519	14.1898	14.4905	17.5071	11.6482	13.5869	16.0119	13.6933	15.9043	14.8092	14.4142	15.7358	16.1989	15.8933	12.1575	14.4101	16.5253	15.0425	16.9452	NA	0.330126	0.661645	-0.526075		-0.743045	Q9UM13	3	Anaphase-promoting complex subunit 10	ANAPC10
12.9302	14.4219	11.4759	12.916	12.2379	11.1399	13.578	13.2891	12.3184	12.9213	11.2519	12.3826	13.0469	11.1762	13.0656	13.1994	13.1304	10.8342	9.93494	and at low levels in colon, thymus, spleen, small intestine, placenta, lung and peripheral blood leukocyte. {ECO:0000269|PubMed:11573242}.;in moderate levels in brain, kidney, and liver;TISSUE SPECIFICITY: Expressed at high levels in skeletal muscle and heart	NaN	1	0		NaN	Q9NYG5	1	Anaphase-promoting complex subunit 11	ANAPC11
15.754	16.6283	16.2255	16.1241	15.7224	16.4261	17.2279	16.8627	17.0116	13.6786	11.5985	12.6247	14.5045	14.4336	13.8435	16.2729	17.2311	15.9465	15.4386	NA	2.23149	0.050265	1.88527	+	3.14799	Q96DE5	1	Anaphase-promoting complex subunit 16	ANAPC16
12.1978	13.6733	13.7409	13.8423	12.1491	13.4136	11.1971	13.8293	13.3539	13.6522	12.7838	13.5243	11.8969	12.9894	12.6767	13.2727	14.081	12.2942	11.8209	NA	NaN	1	0		NaN	Q9UJX6;Q9UJX6-2	5	Anaphase-promoting complex subunit 2;Isoform 2 of Anaphase-promoting complex subunit 2	ANAPC2
14.8024	16.0445	14.2863	14.8954	14.0512	15.5987	16.2312	14.8485	16.73	15.6006	12.965	14.3841	14.0071	14.9389	14.9372	13.9448	14.6364	13.857	14.1079	NA	1.61603	0.11211	0.938587	+	2.47383	Q9UJX5;Q9UJX5-3	7	Anaphase-promoting complex subunit 4;Isoform 3 of Anaphase-promoting complex subunit 4	ANAPC4
13.42	15.3253	14.1384	12.9867	14.5364	14.8197	16.017	14.3334	16.3962	15.1171	11.8699	11.6819	14.4038	12.676	13.0333	14.6165	14.1302	12.7707	11.9605	NA	1.75176	0.092555	1.43768	+	2.62573	F5H0F9;Q9UJX4	8	Anaphase-promoting complex subunit 5	ANAPC5
15.1733	16.6317	15.4673	18.3666	15.8507	15.5311	16.3639	15.3794	16.7544	16.5156	15.4683	15.2812	15.5856	15.8824	15.4476	15.6883	16.1942	14.978	16.9157	NA	0.479963	0.54072	0.373021		1.00037	Q9UJX3;Q9UJX3-2	15	Anaphase-promoting complex subunit 7;Isoform 2 of Anaphase-promoting complex subunit 7	ANAPC7
16.5181	14.3153	16.1823	15.1732	16.4639	16.0258	15.8171	15.7305	16.0294	17.0672	16.9489	16.8139	16.1363	15.3707	17.187	15.3804	14.3254	15.8813	14.5191	TISSUE SPECIFICITY: Expressed predominantly in the liver. Also detected in endothelial cells and spinal cord neurons. {ECO:0000269|PubMed:17886298, ECO:0000269|PubMed:2440105}.	0.149587	0.831212	-0.156843		-0.380045	P03950	10	Angiogenin	ANG
12.5276	13.061	13.7983	13.477	14.434	13.728	13.3986	13.5413	12.6443	12.8007	13.3703	13.2394	13.1386	13.1242	12.516	12.7263	12.4388	12.5362	10.1034	NA	1.37682	0.152717	0.80172	+	2.19916	Q5VTE6-2	4	Isoform 2 of Protein angel homolog 2	ANGEL2
17.5695	16.2367	15.567	17.5434	18.2578	16.4611	17.6394	17.0609	19.2455	14.9414	12.2816	13.8042	15.3332	16.6423	16.6443	14.0057	14.989	13.8026	12.5702	TISSUE SPECIFICITY: Widely expressed in heart, small intestine, spleen and stomach. Also found in lower levels in colon, ovary, adrenal gland, skeletal muscle and in prostate.	3.55819	0.0161622	2.78535	+	4.56202	Q9UKU9	16	Angiopoietin-related protein 2	ANGPTL2
12.301	15.8927	17.7991	18.4679	15.6308	15.6121	17.485	14.8955	17.0919	15.6879	15.9347	17.9021	16.5564	16.1992	16.9363	17.5404	15.8347	16.0383	17.2701	TISSUE SPECIFICITY: Isoform Mu17, isoform Mu18, isoform Mu19 and isoform Mu20 are expressed in skeletal muscle. Isoform Br21 is expressed in brain. {ECO:0000269|PubMed:9430667}.	0.314794	0.675638	-0.459358		-0.714854	P16157;P16157-10;P16157-12;P16157-14;P16157-16;P16157-3;P16157-5;P16157-8	56	Ankyrin-1;Isoform Er9 of Ankyrin-1;Isoform Er11 of Ankyrin-1;Isoform Er13 of Ankyrin-1;Isoform Er15 of Ankyrin-1;Isoform Er5 of Ankyrin-1;Isoform Er3 of Ankyrin-1;Isoform Er7 of Ankyrin-1	ANK1
15.0163	14.0723	16.1121	15.6031	15.0571	14.6586	14.5762	16.5254	15.0855	14.5122	15.6754	17.3196	15.9626	15.8585	16.5533	13.7213	14.0928	13.9951	15.041	NA;TISSUE SPECIFICITY: Present in plasma membrane of neurons as well as glial cells throughout the brain. Expressed in fetal brain and in temporal cortex of adult brain. Also expressed in the inner segments of rod photoreceptors in retina. {ECO:0000269|PubMed:1830053, ECO:0000269|PubMed:1833308, ECO:0000269|PubMed:19007774}.	0.0652755	0.924372	-0.0835534		-0.17849	A0A5F9ZGX3;A0A5F9ZHS1;Q01484	81	Ankyrin-2	ANK2
16.0302	15.844	16.6746	16.911	16.0624	15.3831	16.2888	15.9716	16.8871	15.5748	16.5174	16.9175	15.6106	15.0727	16.1763	15.3416	15.8126	15.617	16.4914	TISSUE SPECIFICITY: Expressed in brain, neurons, muscles and other tissues. {ECO:0000269|PubMed:21223964, ECO:0000269|PubMed:7836469}.	0.633289	0.436401	0.314879		1.23769	Q12955	43	Ankyrin-3	ANK3
16.8618	17.4914	18.2474	18.7049	17.4588	17.758	17.9073	17.9903	18.6456	18.0432	17.8884	17.8845	17.8029	16.9153	18.2056	17.8486	17.5679	17.9164	17.5463	TISSUE SPECIFICITY: High expression in whole adult brain and intermediate expression in all other tissues and specific brain regions examined, including fetal brain. {ECO:0000269|PubMed:10574462, ECO:0000269|PubMed:10940552}.	0.258425	0.726946	0.134267		0.607517	Q9P2R3;Q9P2R3-4	30	Rabankyrin-5;Isoform 4 of Rabankyrin-5	ANKFY1
12.0287	12.7197	11.7542	14.3884	11.5632	13.0261	13.4637	13.4173	13.8004	13.2052	11.2444	12.057	12.9083	12.4168	14.5261	12.6959	13.0502	11.7539	13.3094	NA;not detected in osteoclastic cells.;TISSUE SPECIFICITY: Found in osteoblasts from mandibular bone and from iliac bone	NaN	1	0		NaN	D6RGI5;Q9HCJ1	1	Progressive ankylosis protein homolog	ANKH
15.4538	15.9772	14.825	15.1629	14.063	16.0146	14.4558	15.0208	16.5165	15.5687	15.3997	15.4489	11.3672	14.8193	19.675	14.2381	15.1132	14.3749	15.6351	TISSUE SPECIFICITY: Ubiquitous with high expression in cervix, spleen and brain. Expressed in hematopoietic cells with increased expression in leukemia cells. Isoform 2 is highly expressed in spleen with almost no expression in muscle and brain. {ECO:0000269|PubMed:14557257, ECO:0000269|PubMed:16098192, ECO:0000269|PubMed:16956752}.	0.0565892	0.932031	0.112595		0.156051	Q8IWZ3;Q8IWZ3-4;Q8IWZ3-6	26	Ankyrin repeat and KH domain-containing protein 1;Isoform 4 of Ankyrin repeat and KH domain-containing protein 1;Isoform 6 of Ankyrin repeat and KH domain-containing protein 1	ANKHD1
13.3434	13.5433	13.8997	14.4985	15.0425	14.0044	15.1782	13.7592	15.38	12.9796	13.1311	13.3449	11.7794	13.9194	13.6595	13.4005	13.4411	12.8904	13.5039	NA	2.5911	0.0331379	1.08936	+	3.53131	Q9P2G1	12	Ankyrin repeat and IBR domain-containing protein 1	ANKIB1
15.0728	16.0788	14.0021	16.3725	15.2779	16.0553	16.8237	14.0155	16.5498	16.1106	15.5038	14.2273	14.2428	15.6458	12.2966	14.8728	15.4725	14.3886	17.0003	NA	0.552252	0.489105	0.607017		1.11496	Q86XL3	14	Ankyrin repeat and LEM domain-containing protein 2	ANKLE2
14.7002	14.5204	15.3478	12.9184	14.4472	14.9737	12.6817	14.0442	14.3563	14.7182	14.8553	15.3367	14.8264	14.7668	14.8057	14.0255	13.777	14.5627	13.8718	NA	0.493039	0.532999	-0.333522		-1.0215	Q8IV38	10	Ankyrin repeat and MYND domain-containing protein 2	ANKMY2
14.1494	15.0681	13.5308	12.4418	14.6149	13.7236	14.6426	13.8038	15.0445	14.401	14.9501	13.3063	12.5938	13.0373	12.359	13.5818	12.7243	14.1794	17.1969	NA	0.208543	0.772854	0.280283		0.507001	Q9NXR5	4	Ankyrin repeat domain-containing protein 10	ANKRD10
12.3198	11.4812	11.7481	12.2364	13.3222	11.9863	13.1513	11.7569	13.5266	12.3744	14.4365	13.1515	12.0764	13.014	13.9074	12.4568	12.0765	11.0465	12.7021	NA	NaN	1	0		NaN	Q6UB98;Q6UB98-2	1	Ankyrin repeat domain-containing protein 12;Isoform 2 of Ankyrin repeat domain-containing protein 12	ANKRD12
16.3266	16.5942	16.2456	16.5762	17.2719	16.5964	17.1027	15.907	16.8479	16.2983	14.9074	15.4089	14.6191	14.7531	14.651	15.8845	14.6802	14.3428	15.3726	NA	4.91101	0.00553846	1.51582	+	6.07915	Q8IZ07	8	Ankyrin repeat domain-containing protein 13A	ANKRD13A
12.1344	12.9693	12.2407	12.5209	14.0961	13.1844	12.1941	12.0689	11.9636	11.5592	11.0253	12.5045	12.2439	12.1698	13.4698	11.4416	11.918	12.4419	11.9297	NA	NaN	1	0		NaN	Q6ZTN6;Q6ZTN6-3	1	Ankyrin repeat domain-containing protein 13D;Isoform 3 of Ankyrin repeat domain-containing protein 13D	ANKRD13D
12.3443	12.5057	12.7058	14.4342	11.7063	13.2705	14.0352	18.8295	14.0445	14.0721	12.851	14.3243	14.3191	13.45	14.7172	13.9605	12.8831	10.9444	13.6857	NA	0.123793	0.859333	0.24327		0.321191	Q6P6B7	2	Ankyrin repeat domain-containing protein 16	ANKRD16
14.678	15.8311	14.715	15.0828	13.1397	15.1478	16.1834	14.1549	15.9796	14.7886	15.5196	12.7234	14.8155	12.1763	14.3295	14.5622	15.1908	14.1852	14.7438	NA;TISSUE SPECIFICITY: Ubiquitously expressed. {ECO:0000269|PubMed:17276651, ECO:0000269|PubMed:19150984}.	0.798712	0.34598	0.686771		1.47324	H0YM23;O75179;O75179-2;O75179-7	12	Ankyrin repeat domain-containing protein 17 (Fragment);Ankyrin repeat domain-containing protein 17;Isoform 2 of Ankyrin repeat domain-containing protein 17;Isoform 7 of Ankyrin repeat domain-containing protein 17	ANKRD17
17.0666	17.5653	15.9663	18.115	15.0667	18.7969	18.0271	16.7186	19.2076	18.0854	17.2992	15.137	16.6662	15.7344	16.3498	18.2994	17.6027	17.6404	16.2364	NA	0.414306	0.59133	0.487139		0.891306	Q5VYY1	12	Ankyrin repeat domain-containing protein 22	ANKRD22
15.6252	15.6364	13.6127	16.0203	14.9189	15.7692	16.3912	12.5107	15.9989	11.9746	16.9616	12.6651	12.1398	16.2403	13.1947	15.8853	14.6003	14.7414	15.1632	NA	0.558615	0.485202	0.808199		1.12481	Q96NW4	10	Ankyrin repeat domain-containing protein 27	ANKRD27
15.8477	16.7035	15.0944	18.4559	15.7028	15.7868	15.7439	15.0653	15.807	14.652	14.1391	17.3246	14.2439	15.9897	15.8332	15.1868	15.3068	15.5985	16.3533	NA	0.617054	0.447812	0.560255		1.21354	O15084	16	Serine/threonine-protein phosphatase 6 regulatory ankyrin repeat subunit A	ANKRD28
13.1481	12.0883	18.6168	12.1489	13.5083	15.2992	17.7856	16.3842	18.7951	11.771	17.9286	16.223	17.9448	14.1612	18.0179	11.8198	16.4333	16.7639	12.8325	NA	NaN	1	0		NaN	K7EQM1;Q8N6D5;Q8N6D5-3	1	Ankyrin repeat domain-containing protein 29 (Fragment);Ankyrin repeat domain-containing protein 29;Isoform 3 of Ankyrin repeat domain-containing protein 29	ANKRD29
14.4504	12.6799	14.0175	12.329	14.9173	13.222	13.4859	15.2818	14.905	11.6455	12.4526	15.8754	13.8074	12.2974	13.27	10.284	10.4551	12.2637	11.8771	NA	NaN	1	0		NaN	F6XZD3;Q8N283	1	Ankyrin repeat domain-containing protein 35	ANKRD35
11.7696	12.899	12.1923	11.4923	12.5065	12.7536	12.8155	12.7447	13.7533	12.6972	12.9563	12.9288	11.7983	11.8569	13.8127	11.7097	11.592	10.3853	11.9883	NA	NaN	1	0		NaN	A0A0C4DH05;Q5JPF3;Q5JPF3-2	1	Ankyrin repeat domain-containing protein 36C;Ankyrin repeat domain-containing protein 36C;Isoform 2 of Ankyrin repeat domain-containing protein 36C	ANKRD36C
15.7134	16.1023	16.1957	16.7944	16.7808	15.7692	17.3347	16.8687	17.1936	16.3987	16.3505	16.7267	16.7265	16.5154	16.6675	15.8555	14.9993	16.1392	16.5919	NA	0.413073	0.592566	0.23099		0.889206	A0A2R8Y7Y4	26	Serine/threonine-protein phosphatase 6 regulatory ankyrin repeat subunit B	ANKRD44
13.3097	12.7364	12.6885	13.8274	14.2935	12.1792	12.6498	13.4692	13.6424	14.1578	13.1081	11.7958	13.5125	11.9854	12.6079	12.6431	12.9525	12.6315	12.865	NA	0.60224	0.456333	0.373603		1.19132	Q9ULJ7	4	Ankyrin repeat domain-containing protein 50	ANKRD50
12.4832	13.3994	16.0459	21.5512	13.9864	13.9467	14.2783	15.957	16.7413	16.0069	12.9426	16.4213	13.6479	12.7389	16.1373	12.8476	14.6271	10.7957	19.723	NA	0.2825	0.704897	0.787781		0.654105	Q8NB46	4	Serine/threonine-protein phosphatase 6 regulatory ankyrin repeat subunit C	ANKRD52
13.8794	13.5064	13.1713	14.5605	11.7694	13.8894	16.0516	14.2152	14.5257	15.1325	12.3447	16.9046	16.1247	16.2163	16.8891	13.9483	13.7491	13.2413	16.0459	TISSUE SPECIFICITY: Widely expressed (at protein level).	0.961387	0.272438	-1.10755		-1.68991	Q92625	15	Ankyrin repeat and SAM domain-containing protein 1A	ANKS1A
13.8579	15.6834	13.2405	13.0047	12.3547	13.8822	13.5267	12.7223	13.1468	16.1253	16.2279	12.033	12.3717	12.2513	12.1548	14.7023	13.7517	14.0492	15.415	TISSUE SPECIFICITY: Expressed in kidney and small intestine. {ECO:0000269|PubMed:12588794}.	NaN	1	0		NaN	Q8N8V4	7	Ankyrin repeat and SAM domain-containing protein 4B	ANKS4B
15.15	16.8099	15.4138	16.3759	12.4089	16.1059	17.3185	14.853	17.2656	17.3583	12.6233	12.8335	11.2327	12.5438	17.5843	15.5578	15.486	14.9561	15.791	NA	0.687452	0.404641	1.14793		1.31682	Q9H8Y5	6	Ankyrin repeat and zinc finger domain-containing protein 1	ANKZF1
11.9289	13.4456	11.6761	16.6743	12.8845	11.6797	15.0253	11.3382	13.5604	14.6841	11.1901	12.2637	13.9033	14.9558	13.8267	13.5524	14.5253	13.8823	14.1481	TISSUE SPECIFICITY: Ubiquitously expressed. Present at highest levels in the brain, at high levels in the placenta and testis, at intermediate levels in the intestine, ovary, skeletal muscle and thymus and at lower levels in heart, kidney, liver, lung, pancreas, prostate and spleen. In the kidney, it is widely expressed in tubules, but sparsely expressed in the glomerulus (PubMed:24676636). Expre…	0.373529	0.623634	-0.558403		-0.820789	Q9NQW6;Q9NQW6-2	4	Anillin;Isoform 2 of Anillin	ANLN
13.5538	11.9808	9.89744	13.907	12.3424	12.7996	14.1324	9.6476	13.6618	14.5062	12.7742	11.161	11.8615	12.0022	12.8494	12.8505	12.4657	11.1673	15.1896	TISSUE SPECIFICITY: Broadly expressed with higher levels in liver, skeletal muscle and gastrointestinal muscles. {ECO:0000269|PubMed:15215166, ECO:0000269|PubMed:16906560}.	0.140779	0.841783	-0.246885		-0.360195	Q5XXA6	9	Anoctamin-1	ANO1
17.2053	17.3883	16.0643	16.6672	17.2281	17.4494	18.9232	16.4926	19.1849	17.1272	17.7224	15.2649	15.8123	16.7484	15.9856	16.5142	15.3898	16.5823	17.0238	TISSUE SPECIFICITY: Highly expressed in the brain. Intermediate levels in the retina and heart and low levels in the placenta, liver, lung, duodenum, kidney, testis and spleen. In brain areas, highest expression in the frontal and occipital cortices and in the cerebellum. Lower expression in the fetal brain than in the adult brain. {ECO:0000269|PubMed:21092923}.	1.48706	0.133006	0.983284	+	2.32701	Q9NW15	14	Anoctamin-10	ANO10
16.3426	15.6222	16.3903	16.3316	17.0192	16.5702	17.8117	16.5413	18.4434	16.1604	15.3371	16.2946	15.2749	15.4668	15.7507	15.7415	15.7424	15.2826	15.9105	TISSUE SPECIFICITY: Expressed in embryonic stem cell, fetal liver, retina, chronic myologenous leukemia and intestinal cancer. {ECO:0000269|PubMed:15067359}.	2.73855	0.0283599	1.08967	+	3.68774	Q4KMQ2;Q4KMQ2-2;Q4KMQ2-3	18	Anoctamin-6;Isoform 2 of Anoctamin-6;Isoform 3 of Anoctamin-6	ANO6
12.1285	12.1598	14.1609	12.8507	13.4877	14.4733	13.4417	14.382	13.0462	12.0557	12.0553	10.9901	12.3323	11.9386	12.594	14.989	14.282	15.8539	12.2851	NA;TISSUE SPECIFICITY: Expressed in embryonic stem cells, fetal brain and neural tissues. {ECO:0000269|PubMed:15647853}.	NaN	1	0		NaN	M0QYD2;Q9HCE9;Q9HCE9-2	1	Anoctamin;Anoctamin-8;Isoform 2 of Anoctamin-8	ANO8
15.0542	14.809	15.9398	13.9755	12.0733	15.3305	16.1136	11.174	15.9793	11.9287	13.116	13.4005	12.6161	15.2583	11.9066	13.5606	15.7094	15.4663	16.3443	NA	NaN	1	0		NaN	A1A5B4	8	Anoctamin-9	ANO9
19.5456	19.6862	19.6132	19.3255	18.8851	19.7681	19.27	19.4382	18.9238	17.9033	17.8939	17.2343	17.7975	17.4742	17.4871	19.6622	19.3868	18.7175	18.967	TISSUE SPECIFICITY: Expressed in all tissues tested. Highly expressed in kidney and skeletal muscle, moderate levels of expression in brain, placenta and pancreas, and weakly expressed in lung. Found in all regions of the brain examined (amygdala, caudate nucleus, corpus callosum, hippocampus and thalamus), with highest levels in amygdala. {ECO:0000269|PubMed:15642345}.	2.76127	0.0281583	1.13159	+	3.71183	P39687	13	Acidic leucine-rich nuclear phosphoprotein 32 family member A	ANP32A
20.2831	21.3952	20.5427	21.962	20.8086	20.8108	20.1572	20.1048	20.0647	20.1641	19.9246	19.5881	19.9342	20.1623	19.7939	20.8884	21.0328	20.4513	20.938	TISSUE SPECIFICITY: Expressed in heart, lung, pancreas, prostate and in spleen, thymus and placenta. {ECO:0000269|PubMed:9473664}.	0.798987	0.345984	0.393245		1.47362	Q92688;Q92688-2	7	Acidic leucine-rich nuclear phosphoprotein 32 family member B;Isoform 2 of Acidic leucine-rich nuclear phosphoprotein 32 family member B	ANP32B
12.2608	17.1542	18.9316	13.4135	19.1794	19.907	20.4191	19.5594	20.1763	12.999	11.7422	13.4818	12.1851	12.8121	12.0736	19.4678	19.4002	18.9665	12.2361	NA	1.45699	0.137198	3.35258	+	2.29236	O95626	1	Acidic leucine-rich nuclear phosphoprotein 32 family member D	ANP32D
14.6327	15.0179	14.7807	15.0322	13.3292	13.7839	16.3633	15.0447	15.2539	15.1894	13.9902	12.7542	14.533	13.7115	13.7943	14.1336	14.3661	14.1685	13.9536	TISSUE SPECIFICITY: Expressed in peripheral blood leukocytes, colon, small intestine, prostate, thymus, spleen, skeletal muscle, liver and kidney. {ECO:0000269|PubMed:12438741}.	1.3451	0.158833	0.744857	+	2.16193	Q9BTT0	7	Acidic leucine-rich nuclear phosphoprotein 32 family member E	ANP32E
15.0708	16.514	16.1956	16.8773	18.3575	15.7045	18.285	16.4231	18.9283	16.3628	16.3238	15.6542	16.8819	16.3006	17.119	14.9741	15.5554	18.3367	16.4739	granulocytes, monocytes, fibroblasts, endothelial cells, cerebral pericytes at the blood-brain barrier, synaptic membranes of cells in the CNS. Also expressed in endometrial stromal cells, but not in the endometrial glandular cells. Found in the vasculature of tissues that undergo angiogenesis and in malignant gliomas and lymph node metastases from multiple tumor types but not in blood vessels of…	0.494101	0.532231	0.530214		1.0232	P15144	43	Aminopeptidase N	ANPEP
16.6768	15.908	15.6623	15.776	17.6761	15.3182	18.2851	16.8166	18.4521	16.3064	13.7636	15.5522	15.6941	16.215	14.9598	15.481	14.8161	14.7109	14.7695	TISSUE SPECIFICITY: Detected in umbilical vein endothelial cells (at protein level). Highly expressed in tumor endothelial cells. {ECO:0000269|PubMed:15777794}.	2.40324	0.0411007	1.50327	+	3.33155	Q9H6X2;Q9H6X2-5	9	Anthrax toxin receptor 1;Isoform 5 of Anthrax toxin receptor 1	ANTXR1
16.1248	15.397	15.4261	15.3454	16.4355	14.5623	16.0314	17.0678	16.7327	15.5839	16.4792	16.7191	15.8316	15.4896	15.5936	14.1261	14.1606	14.4526	15.888	TISSUE SPECIFICITY: Expressed in prostate, thymus, ovary, testis, pancreas, colon, heart, kidney, lung, liver, peripheral blood leukocytes, placenta, skeletal muscle, small intestine and spleen. {ECO:0000269|PubMed:14508707}.	0.605474	0.455218	0.470161		1.19618	P58335-4	7	Isoform 4 of Anthrax toxin receptor 2	ANTXR2
21.8618	20.7978	21.3877	21.8166	22.9104	21.2014	22.178	22.5608	22.6085	21.5792	20.9375	22.1567	21.8292	21.5773	21.095	20.5852	20.5207	20.8863	21.0954	TISSUE SPECIFICITY: Detected in resting neutrophils (PubMed:10772777). Detected in peripheral blood T-cells (PubMed:17008549). Detected in extracellular vesicles in blood serum from patients with inflammatory bowel disease, but not in serum from healthy donors (PubMed:25664854). Detected in placenta (at protein level) (PubMed:2532504). Detected in liver. {ECO:0000269|PubMed:2532504, ECO:0000269|P…	1.58212	0.117506	0.698532	+	2.43548	P04083	41	Annexin A1	ANXA1
20.8961	20.6451	20.3791	20.9742	20.5903	20.3858	20.7875	20.6955	20.457	19.945	20.1079	20.3457	19.948	20.4129	20.2843	20.4975	20.3384	20.9936	21.3465	NA	0.725839	0.383037	0.223624		1.37166	P50995;P50995-2	33	Annexin A11;Isoform 2 of Annexin A11	ANXA11
21.6745	20.2589	20.7273	18.6199	20.8645	20.2902	20.7593	18.8187	21.2443	19.8725	21.2846	20.0699	19.5691	19.4301	19.9769	19.2045	18.4295	19.7985	22.1527	TISSUE SPECIFICITY: Detected in epithelial cells in colon and jejunum (at protein level). Detected in epithelial cells in jejunum. {ECO:0000269|PubMed:1530946}.	0.362225	0.634529	0.383103		0.800821	P27216-2	30	Isoform B of Annexin A13	ANXA13
20.9198	20.3923	19.1797	21.0683	19.3526	19.3281	19.5705	17.7105	19.4421	18.7593	19.0338	18.2623	19.0755	19.1276	18.7735	20.1233	19.9624	19.0992	20.273	NA	0.516917	0.515868	0.413669		1.05961	D6RA82	29	Annexin	ANXA3
22.6828	23.1718	21.8991	22.5099	21.7457	22.5444	22.3349	21.634	21.9974	22.1467	22.3529	21.8148	21.8311	22.6173	22.3314	22.5616	21.9977	22.4692	23.4326	NA	0.130784	0.852762	-0.0755161		-0.337362	P09525	53	Annexin A4	ANXA4
23.1348	22.2586	22.9903	22.3652	22.9247	22.4867	21.6897	23.5476	21.7173	23.4793	23.3068	23.4707	23.5835	23.4426	23.4641	22.3052	21.9684	22.5848	22.0337	NA	0.694159	0.400851	-0.395596		-1.32647	P08758	39	Annexin A5	ANXA5
11.7286	12.308	14.8911	13.33	12.362	12.7765	16.1068	15.53	14.9951	12.329	14.2941	16.2262	15.0359	15.9363	15.0683	13.4645	11.7929	14.8002	11.1681	NA	0.113699	0.870469	-0.230665		-0.297535	E5RK69	3	Annexin	ANXA6
19.1877	19.3882	20.021	20.2236	19.7589	19.4893	19.0564	19.6926	19.8696	18.1525	18.6704	19.1519	18.5823	18.9698	18.6821	19.5301	19.1578	19.4331	19.7878	TISSUE SPECIFICITY: Isoform 1 is expressed in brain, heart and skeletal muscle. Isoform 2 is more abundant in liver, lung, kidney, spleen, fibroblasts and placenta. {ECO:0000269|PubMed:1825209}.	2.1004	0.0587349	0.62014	+	3.00697	P20073;P20073-2	33	Annexin A7;Isoform 2 of Annexin A7	ANXA7
12.8877	13.78	13.9041	16.326	14.4539	13.7474	16.7636	15.0041	16.9079	12.7667	13.5281	11.4426	10.7577	13.418	15.9678	14.2794	13.1893	14.0624	14.5027	NA	1.33763	0.160232	1.47239	+	2.15313	A0A087WVT3;P28039;P28039-2	7	Acyloxyacyl hydrolase;Acyloxyacyl hydrolase;Isoform 2 of Acyloxyacyl hydrolase	AOAH
16.7957	16.8727	18.9984	19.0496	16.4451	15.4693	17.8682	15.9591	17.1312	16.1071	18.7552	18.0501	17.2016	16.5792	18.1086	17.3029	17.0281	19.0916	19.9912	TISSUE SPECIFICITY: Placenta and kidney.	0.571457	0.476674	-0.644965		-1.14456	P19801-2	31	Isoform 2 of Amiloride-sensitive amine oxidase [copper-containing]	AOC1
12.3049	13.2224	14.5878	12.1363	16.1926	16.1533	16.2384	14.3803	15.903	12.6848	14.9236	14.5825	14.6803	13.7996	14.7559	12.9267	11.8783	10.7643	11.6952	TISSUE SPECIFICITY: Abundant in liver, expressed in adipose tissue and at lower levels in lung, skeletal muscle, pancreas. In contrast to mice, no significant gender difference in AOX1 expression level (at protein level). {ECO:0000269|PubMed:18066686, ECO:0000269|PubMed:18671973, ECO:0000269|PubMed:20444863, ECO:0000269|PubMed:22031625, ECO:0000269|PubMed:22522748, ECO:0000269|PubMed:23857892, EC…	1.03558	0.244414	1.29968		1.78489	Q06278	12	Aldehyde oxidase	AOX1
17.6321	17.874	17.9288	18.1587	18.3719	17.5811	18.9859	17.8352	19.3335	18.1482	18.6028	17.9382	17.9962	17.7144	17.9629	17.9167	18.0378	18.2501	18.7049	TISSUE SPECIFICITY: Widely expressed.	0.107821	0.877697	0.0618407		0.283587	Q10567;Q10567-2;Q10567-3	31	AP-1 complex subunit beta-1;Isoform B of AP-1 complex subunit beta-1;Isoform C of AP-1 complex subunit beta-1	AP1B1
17.8911	19.1105	18.2552	19.0708	18.1347	18.7801	18.5393	17.8442	18.8911	18.3643	18.2206	17.5753	17.7003	17.381	17.4075	18.4999	18.0531	18.077	18.7168	TISSUE SPECIFICITY: Widely expressed.	1.45256	0.137505	0.502337	+	2.28725	O43747;O43747-2	35	AP-1 complex subunit gamma-1;Isoform 2 of AP-1 complex subunit gamma-1	AP1G1
14.5051	17.1651	15.838	15.9871	15.2051	16.2229	15.3046	15.1494	15.8523	16.667	16.3542	15.9868	15.9417	15.6048	15.8202	15.6919	16.9538	15.9603	15.5967	TISSUE SPECIFICITY: Expressed in all but one (skeletal muscle) tissues examined.	0.661666	0.419579	-0.365566		-1.27941	O75843	13	AP-1 complex subunit gamma-like 2	AP1G2
17.2406	17.0816	17.5424	18.5237	17.4614	16.9974	16.1726	17.9213	16.3518	15.7374	15.5309	15.9328	16.2658	15.6848	15.5863	16.8064	16.3592	16.8059	18.2763	NA	1.75874	0.091743	0.956198	+	2.63347	E7ENJ6;Q9BXS5;Q9BXS5-2	11	AP-1 complex subunit mu-1;AP-1 complex subunit mu-1;Isoform 2 of AP-1 complex subunit mu-1	AP1M1
18.3852	19.4746	18.8869	20.4438	18.4922	18.7239	18.882	17.5985	19.1587	18.2252	18.8671	17.4366	17.8839	17.6809	18.4603	19.1612	18.8062	19.0338	19.3561	NA	0.61686	0.447916	0.40284		1.21325	Q9Y6Q5	20	AP-1 complex subunit mu-2	AP1M2
16.8121	18.2509	17.1266	17.5114	16.4084	18.0125	18.8518	17.1547	18.7074	17.4181	16.8658	16.6175	16.1236	16.4878	15.2619	17.5473	17.2963	16.9877	17.4799	NA;TISSUE SPECIFICITY: Widely expressed. {ECO:0000269|PubMed:9733768}.	1.48806	0.132825	0.839849	+	2.32815	A0A2R8YGH5;P61966	9	AP complex subunit sigma;AP-1 complex subunit sigma-1A	AP1S1
16.0315	15.6562	16.8446	21.3929	16.5278	16.172	17.2826	17.7229	17.8023	15.1929	16.0045	16.005	16.0057	15.8868	14.6749	15.6503	16.0388	14.43	21.1011	TISSUE SPECIFICITY: Widely expressed.	0.762974	0.364386	1.17129		1.42382	P56377	3	AP-1 complex subunit sigma-2	AP1S2
17.1513	17.4522	12.7648	16.0983	15.8008	14.4318	15.0429	11.1524	16.4468	12.0616	14.1647	13.6532	13.2401	11.0875	11.6747	16.9699	13.2668	14.7417	12.9521	NA	1.24845	0.184046	1.76781		2.04704	F8W8K9;G5E966	3	AP-1 complex subunit sigma-3	AP1S3
19.6759	20.1376	19.3382	20.4348	20.1167	19.2597	20.209	20.3648	20.5986	20.6629	19.6318	19.3397	19.5466	19.569	19.5579	19.4045	19.6213	19.2674	20.3352	TISSUE SPECIFICITY: Expressed in the brain (at protein level) (PubMed:23676497). Isoform A: Expressed in forebrain, skeletal muscle, spinal cord, cerebellum, salivary gland, heart and colon. Isoform B: Widely expressed in tissues and also in breast cancer and in prostate carcinoma cells. {ECO:0000269|PubMed:23676497}.	0.82515	0.333832	0.321424		1.50935	O95782;O95782-2	43	AP-2 complex subunit alpha-1;Isoform B of AP-2 complex subunit alpha-1	AP2A1
18.8397	18.3875	19.4048	19.1548	18.9439	18.3341	19.2136	19.0564	19.5527	18.6473	18.9913	18.9989	18.9516	18.6991	18.7888	18.7156	18.4194	18.7305	19.2253	TISSUE SPECIFICITY: Expressed in the brain (at protein level). {ECO:0000269|PubMed:23676497}.	0.558446	0.485304	0.170716		1.12454	O94973;O94973-2	46	AP-2 complex subunit alpha-2;Isoform 2 of AP-2 complex subunit alpha-2	AP2A2
17.2057	17.6513	17.4439	17.9144	17.5772	17.2718	18.7973	17.3268	18.5081	17.5451	17.6181	17.1913	17.2355	16.9786	17.0887	17.2998	17.3943	17.2958	17.7501	TISSUE SPECIFICITY: Expressed in the brain (at protein level). {ECO:0000269|PubMed:23676497}.	1.272	0.177358	0.404305		2.07524	P63010;P63010-2	67	AP-2 complex subunit beta;Isoform 2 of AP-2 complex subunit beta	AP2B1
18.9977	19.3785	19.0436	20.0738	19.9885	18.2791	19.8073	19.2017	19.4789	18.8014	18.9203	18.6792	18.7322	18.4865	18.6462	18.4588	17.7989	17.9668	18.4966	NA;TISSUE SPECIFICITY: Expressed in the brain (at protein level). {ECO:0000269|PubMed:23676497}.	3.05617	0.0225	0.862327	+	4.02481	A0A087WY71;Q96CW1;Q96CW1-2	23	AP-2 complex subunit mu;AP-2 complex subunit mu;Isoform 2 of AP-2 complex subunit mu	AP2M1
19.8129	20.2241	19.7507	19.8868	20.4102	18.9465	18.2459	19.5983	19.4612	19.324	19.6349	19.4488	19.4626	19.3303	19.3328	18.8708	18.7504	19.1852	19.5218	NA	0.707477	0.394064	0.306774		1.34555	M0QYZ2;M0R0N4;P53680	3	AP complex subunit sigma;AP complex subunit sigma;AP-2 complex subunit sigma	AP2S1
16.8291	17.5921	17.2712	19.0052	17.3362	17.0474	17.9302	17.294	17.8095	17.9881	17.9901	17.7316	17.7707	17.6252	17.8274	17.4919	17.1871	17.4283	18.207	TISSUE SPECIFICITY: Ubiquitously expressed. {ECO:0000269|PubMed:9151686, ECO:0000269|PubMed:9182526}.	0.30245	0.686875	-0.156409		-0.691857	O00203	42	AP-3 complex subunit beta-1	AP3B1
18.0634	18.9586	18.0613	19.2478	18.7299	18.6905	19.0198	18.2371	19.0141	18.116	18.2965	17.4411	17.7	17.3869	17.7067	18.5421	17.8344	18.2006	18.2466	TISSUE SPECIFICITY: Present in all adult tissues examined with the highest levels in skeletal muscle, heart, pancreas and testis. {ECO:0000269|PubMed:9151686}.	2.81982	0.0260769	0.722067	+	3.77392	O14617-5	37	Isoform 5 of AP-3 complex subunit delta-1	AP3D1
15.3788	16.1227	15.6107	16.3517	16.92	16.2531	17.0152	15.6388	17.0709	16.7905	16.8956	16.6056	16.52	16.3182	16.1841	15.6636	15.296	15.9683	15.2596	NA	0.157653	0.821983	0.112262		0.398005	Q9Y2T2	12	AP-3 complex subunit mu-1	AP3M1
16.6205	16.8051	16.5216	17.3474	17.2888	15.9992	17.1291	16.0283	16.9012	17.3419	17.4252	17.1314	17.267	16.8709	16.9531	16.805	15.9454	15.7941	16.0997	NA	0.0354859	0.956137	-0.0254744		-0.0999673	E5RJ52;P53677	9	AP-3 complex subunit mu-2 (Fragment);AP-3 complex subunit mu-2	AP3M2
18.4968	18.7674	17.2521	20.8424	18.2633	18.5996	18.5615	18.0866	18.6763	17.2886	17.91	17.0206	17.0622	17.7922	17.1577	18.2003	17.4461	17.6151	20.0473	TISSUE SPECIFICITY: Present in all adult tissues examined. {ECO:0000269|PubMed:8697810, ECO:0000269|PubMed:9118953, ECO:0000269|PubMed:9151686}.	1.23864	0.186371	0.862228		2.03525	Q92572	6	AP-3 complex subunit sigma-1	AP3S1
12.1301	12.7075	11.5788	12.6325	12.6744	14.5547	12.6168	11.7364	14.0565	12.5311	12.7187	12.6771	12.2712	10.5704	12.7727	14.3301	14.1408	14.2791	11.0852	NA;TISSUE SPECIFICITY: Present in all adult tissues examined. {ECO:0000269|PubMed:9118953}.	NaN	1	0		NaN	H0YLX6;H0YN38;P59780-2	1	AP-3 complex subunit sigma-2;AP complex subunit sigma;Isoform 3 of AP-3 complex subunit sigma-2	AP3S2
13.6306	14.7223	13.5013	14.2184	14.7759	14.2389	14.981	14.2887	12.7015	14.4323	13.732	13.7736	13.8662	12.718	13.3966	14.0436	14.0737	13.0486	13.9114	NA;TISSUE SPECIFICITY: Widely expressed. {ECO:0000269|PubMed:10436028}.	0.791261	0.350578	0.418022		1.463	B1ALD0;Q9Y6B7	6	AP complex subunit beta;AP-4 complex subunit beta-1	AP4B1
12.6143	12.4662	11.558	12.4084	13.3557	12.1266	12.6303	11.8395	13.5926	13.963	13.3076	13.238	11.8744	12.8089	13.5004	12.7543	13.3208	11.822	12.0143	TISSUE SPECIFICITY: Widely expressed. {ECO:0000269|PubMed:10436028}.	NaN	1	0		NaN	Q9UPM8	2	AP-4 complex subunit epsilon-1	AP4E1
15.574	15.437	14.4771	15.1505	16.7072	13.6796	12.3612	15.4973	13.4635	14.9844	14.5477	14.3592	14.9248	14.1904	14.9699	14.582	14.8738	14.6423	15.2953	TISSUE SPECIFICITY: Widely expressed.	0.0255893	0.96613	-0.0317059		-0.0728437	Q9Y587	1	AP-4 complex subunit sigma-1	AP4S1
10.4247	12.7881	11.6908	12.6674	11.0764	8.64008	12.0868	12.2265	13.3965	11.907	12.4659	11.216	13.5978	11.273	12.7824	11.1609	11.8785	11.4881	11.2217	NA	NaN	1	0		NaN	Q2VPB7	3	AP-5 complex subunit beta-1	AP5B1
12.8183	11.6649	13.1306	13.2906	13.263	14.9433	14.53	14.4685	13.7159	12.4632	15.34	14.7936	15.1164	13.4297	13.1124	13.7978	13.7076	10.1847	11.3315	NA;TISSUE SPECIFICITY: Expressed in various tumor cell lines including Jurkat, Hep-G2 and HeLa. {ECO:0000269|PubMed:18395520}.	NaN	1	0		NaN	E7EQ45;Q9H0R1	3	AP-5 complex subunit mu-1	AP5M1
14.8465	14.717	14.1184	11.7779	14.5053	14.2907	15.4726	14.5434	15.0792	15.4241	12.4865	12.0115	12.8353	14.8734	12.5328	13.8465	14.3951	14.0231	12.2824	NA	0.994844	0.259883	0.901296		1.733	O43299	5	AP-5 complex subunit zeta-1	AP5Z1
15.2496	16.5359	16.089	17.0402	16.5689	16.5133	17.3338	15.9785	17.5531	16.3324	16.9611	13.968	16.2418	16.0481	15.8938	16.2231	15.7816	16.0246	16.1136	TISSUE SPECIFICITY: Ubiquitous. Highest levels of expression in adult spleen and peripheral blood leukocytes, and in fetal brain, kidney and lung. Isoform 1 is expressed in heart, kidney and liver.	0.969107	0.269969	0.581438		1.69989	O14727;O14727-4	24	Apoptotic protease-activating factor 1;Isoform 4 of Apoptotic protease-activating factor 1	APAF1
12.2172	12.5888	12.5879	13.5327	13.4749	12.7051	12.8237	14.3194	12.4369	12.0928	11.0136	11.7618	12.5161	12.3905	13.2615	11.3473	12.2473	11.7918	11.14	NA;strongly reduced in post-mortem elderly subjects with Alzheimer disease. {ECO:0000269|PubMed:19343227}.;TISSUE SPECIFICITY: Highly expressed in brain	NaN	1	0		NaN	A0A075B7G8;A0A087WYH9;A0A087X0V7;J3KPL8;O00213;O00213-2;O00213-3;O00213-4;O00213-5;O00213-6;V9GY97	2	Amyloid-beta A4 precursor protein-binding family B member 1;Amyloid-beta A4 precursor protein-binding family B member 1;Amyloid-beta A4 precursor protein-binding family B member 1;Amyloid-beta A4 precursor protein-binding family B member 1;Amyloid-beta A4 precursor protein-binding family B member 1;Isoform 2 of Amyloid-beta A4 precursor protein-binding family B member 1;Isoform 3 of Amyloid-beta …	APBB1
16.3889	16.6721	15.9056	16.1316	17.9535	16.3063	17.7144	16.6244	18.1365	16.6232	14.1258	14.4936	15.1111	14.9248	14.7302	16.2669	14.1707	15.7556	15.1885	TISSUE SPECIFICITY: Widely expressed with high expression in thymus, spleen, lymph node, bone marrow and peripheral leukocytes. {ECO:0000269|PubMed:14530287, ECO:0000269|PubMed:15469846}.	3.47504	0.0163146	1.73133	+	4.47243	Q7Z5R6	11	Amyloid beta A4 precursor protein-binding family B member 1-interacting protein	APBB1IP
15.2708	14.6831	12.5681	13.2817	14.0354	14.4548	14.6021	14.2716	14.1803	14.8895	11.6702	11.9114	11.7033	12.2095	12.1349	12.2396	13.8002	11.8738	13.4587	NA	2.59301	0.033237	1.56066	+	3.53334	G5E9Y1;H0YAJ5;Q92870;Q92870-2;Q92870-4	3	Amyloid beta (A4) protein-binding, family B, member 2 (Fe65-like), isoform CRA_c;Amyloid-beta A4 precursor protein-binding family B member 2 (Fragment);Amyloid-beta A4 precursor protein-binding family B member 2;Isoform 2 of Amyloid-beta A4 precursor protein-binding family B member 2;Isoform 4 of Amyloid-beta A4 precursor protein-binding family B member 2	APBB2
11.3306	10.922	11.7741	13.316	12.1273	12.4638	13.9867	11.9541	12.0488	6.76158	13.4351	13.7475	10.609	13.1651	12.2171	8.1703	12.1404	11.6552	13.5559	TISSUE SPECIFICITY: Expressed in a variety of tissues: brain, small intestine, colon, thymus, skeletal muscle, heart, prostate, lung, spleen, ovary, testis kidney, placenta, blood and liver (PubMed:21643010, PubMed:27217144). Isoform 1A: Very strongly expressed in brain but has relatively low expression levels in other tissues (PubMed:19527921, PubMed:21643010, PubMed:27217144). Isoform 1B: Predo…	NaN	1	0		NaN	P25054;P25054-2;P25054-3	2	Adenomatous polyposis coli protein;Isoform 2 of Adenomatous polyposis coli protein;Isoform 1B of Adenomatous polyposis coli protein	APC
11.3056	11.634	11.6854	14.0528	12.8423	11.9338	12.4714	11.9226	14.6356	12.3311	11.7333	11.842	11.3109	17.2259	11.976	10.3146	14.0235	11.3034	13.4092	TISSUE SPECIFICITY: Abundantly expressed in heart, pancreas, prostate and ovary. Moderately expressed in lung, liver, kidney, spleen, thymus, colon and peripheral lymphocytes. Abundantly expressed in both the epidermal and dermal compartments of the hair follicle. Present in scalp skin Highly expressed in the hair follicle dermal papilla, the matrix, and the hair shaft (at protein level). {ECO:00…	NaN	1	0		NaN	Q8J025	9	Protein APCDD1	APCDD1
16.8878	16.0646	17.3737	15.2705	17.9026	15.6619	17.5761	17.1538	17.1754	17.0325	16.3681	19.1274	16.6985	16.4167	16.8747	14.2261	13.1282	11.145	14.1491	TISSUE SPECIFICITY: Found in serum and urine. {ECO:0000269|PubMed:15174148}.	0.84344	0.324975	1.26852		1.53411	P02743	7	Serum amyloid P-component	APCS
18.7896	19.2086	18.9972	19.6096	17.7586	18.6034	19.1371	18.4315	18.6748	17.2178	18.4833	18.358	17.8549	17.9723	18.509	18.7198	18.5614	19.0127	19.5188	NA	0.749697	0.370791	0.380354		1.40527	C9JIF9;P13798	23	Acylamino-acid-releasing enzyme	APEH
18.6361	18.7838	18.5448	19.3632	18.3457	18.7451	19.9222	18.4011	19.7332	18.5814	18.4677	18.2163	18.0996	18.2707	17.9613	18.7287	19.2867	17.9489	19.0264	NA	1.23495	0.187438	0.482927		2.03081	P27695	25	DNA-(apurinic or apyrimidinic site) endonuclease	APEX1
19.5139	20.5385	19.5313	21.9258	19.525	20.0212	20.8943	19.3597	20.7596	20.3354	19.7437	19.2423	19.7026	19.4458	19.5031	19.5521	20.2332	19.3368	20.9269	NA;TISSUE SPECIFICITY: Expressed in all tissues tested, including heart, brain, placenta, lung, liver, skeletal muscle, kidney and pancreas. Highest levels in heart, pancreas and placenta. Highly expressed in several cancers. Preferentially expressed in squamous cell carcinoma versus adenocarcinoma in non-small cell lung cancer. {ECO:0000269|PubMed:10780674, ECO:0000269|PubMed:11075807, ECO:00002…	0.684621	0.406354	0.427729		1.31274	G3V1C3;Q9BZZ5;Q9BZZ5-2	23	Apoptosis inhibitor 5;Apoptosis inhibitor 5;Isoform 2 of Apoptosis inhibitor 5	API5
16.413	17.1403	15.8734	17.7186	17.3837	16.3232	16.3806	15.6079	17.2101	16.6419	17.5087	16.9615	16.7395	16.5169	17.2238	17.0397	15.043	15.7287	17.6213	TISSUE SPECIFICITY: Isoform 1 is ubiquitously expressed. Isoform 2 is expressed at lower levels and detected in heart, brain, pancreas, liver, placenta, skeletal muscle and kidney. {ECO:0000269|PubMed:15262985, ECO:0000269|PubMed:23285211}.	0.030503	0.961403	-0.0301996		-0.0863794	Q96GX9	9	Methylthioribulose-1-phosphate dehydratase	APIP
14.3136	15.2012	14.34	16.7047	14.9865	15.5914	15.6242	13.1383	16.1834	14.7322	14.3852	14.5685	14.6471	14.2367	14.9426	14.4953	14.5717	14.4279	15.937	TISSUE SPECIFICITY: Expressed in placenta, brain, heart, lung, liver, kidney and endothelial tissues.	0.563834	0.481846	0.425953		1.13285	Q06481;Q06481-3;Q06481-6	8	Amyloid-like protein 2;Isoform 3 of Amyloid-like protein 2;Isoform 6 of Amyloid-like protein 2	APLP2
17.9555	18.8943	17.8861	18.6974	19.4317	19.3251	18.8039	17.4118	20.0577	17.8058	17.892	17.8482	17.6386	18.2389	18.1807	17.7341	18.9456	18.7865	19.2174	TISSUE SPECIFICITY: Liver, glomerular and tubular structures of the kidney, endothelial cells, arterial wall and pancreatic islets of Langerhans (at protein level). Found ubiquitously in adult as well as in embryonic tissues. In adult tissue, the highest expression is found in the liver, placenta and heart. Found on the cell surface of monocytes. In embryonic tissue, the highest expression levels…	0.821301	0.335276	0.489425		1.50411	Q9HDC9	25	Adipocyte plasma membrane-associated protein	APMAP
21.1765	21.1583	22.0747	22.0376	22.8372	21.9145	22.6226	22.8817	20.1068	20.6288	22.0445	22.5874	21.9551	21.1598	22.9588	21.925	20.0704	22.524	20.5199	TISSUE SPECIFICITY: Major protein of plasma HDL, also found in chylomicrons. Synthesized in the liver and small intestine. The oxidized form at Met-110 and Met-136 is increased in individuals with increased risk for coronary artery disease, such as in carrier of the eNOSa/b genotype and exposure to cigarette smoking. It is also present in increased levels in aortic lesions relative to native ApoA…	0.217933	0.76342	0.230386		0.526365	P02647	45	Apolipoprotein A-I	APOA1
19.2196	18.8903	20.5834	21.4718	20.3491	20.3534	20.8574	22.1708	20.3777	20.1557	20.6979	21.9065	20.6273	19.9993	21.6003	20.1028	16.8075	20.86	20.3746	NA	0.109693	0.87594	0.161636		0.288043	V9GYM3	8	Apolipoprotein A-II	APOA2
14.9013	15.0185	15.8881	17.6598	16.607	17.5198	17.0026	17.1235	15.3585	17.6106	17.5156	17.577	16.618	16.5596	18.7229	15.9497	15.4653	17.2771	13.6341	TISSUE SPECIFICITY: Synthesized primarily in the intestine and secreted in plasma.	0.255107	0.73005	-0.350859		-0.601004	P06727	33	Apolipoprotein A-IV	APOA4
16.2582	16.6877	17.9278	17.3851	18.7454	17.3269	18.1347	17.3357	18.0813	16.5679	17.1424	17.7568	16.93	17.3286	18.1489	18.2812	18.1416	17.2596	16.8289	NA	0.126924	0.8561	0.10392		0.328453	P04114	152	Apolipoprotein B-100	APOB
11.2029	13.2895	13.4409	11.0634	13.6801	13.844	14.6209	13.1777	12.7781	14.9352	11.4564	13.3369	11.8339	12.9674	12.7359	13.8331	14.2283	13.507	11.2489	NA;TISSUE SPECIFICITY: Expressed at high and moderate levels in peripheral blood leukocytes, spleen, testes, heart, thymus, prostate and ovary. Also expressed at low levels in several other tissues. {ECO:0000269|PubMed:11863358, ECO:0000269|PubMed:20308164}.	0.00158121	0.997889	0.00254111		0.00462231	B0QYD3;Q9UH17;Q9UH17-3	4	DNA dC->dU-editing enzyme APOBEC-3B;DNA dC->dU-editing enzyme APOBEC-3B;Isoform 3 of DNA dC->dU-editing enzyme APOBEC-3B	APOBEC3B
15.6509	15.642	14.1752	15.8498	16.2941	15.3243	17.7414	13.4466	16.2207	14.2393	13.8685	14.9868	14.7751	12.5431	15.4735	15.0338	13.4199	13.8806	13.98	TISSUE SPECIFICITY: Expressed in spleen, testes, peripherical blood lymphocytes, heart, thymus, prostate and ovary. {ECO:0000269|PubMed:11863358, ECO:0000269|PubMed:20308164}.	1.92624	0.073054	1.37383	+	2.81787	Q9NRW3	5	DNA dC->dU-editing enzyme APOBEC-3C	APOBEC3C
13.9123	14.9992	14.2563	13.9297	14.4828	15.7564	13.0568	15.2655	13.1143	12.7306	15.1633	12.2312	12.1397	14.8866	11.8362	14.5048	14.249	14.206	13.3338	TISSUE SPECIFICITY: Widely expressed. Highly expressed in ovary. {ECO:0000269|PubMed:11863358, ECO:0000269|PubMed:15152192, ECO:0000269|PubMed:20308164}.	0.854673	0.318773	0.780019		1.54923	Q8IUX4	6	DNA dC->dU-editing enzyme APOBEC-3F	APOBEC3F
13.45	15.2054	14.19	14.4693	15.2904	13.8937	13.2752	14.3092	15.3853	13.0511	14.0228	13.3905	13.7375	13.1604	12.0231	14.2715	11.7487	13.2587	12.6665	no expression detected in permissive lymphoid and non-lymphoid cell lines. Exists only in the LMM form in peripheral blood-derived resting CD4 T-cells and monocytes, both of which are refractory to HIV-1 infection. LMM is converted to a HMM complex when resting CD4 T-cells are activated or when monocytes are induced to differentiate into macrophages. This change correlates with increased suscepti…	2.4859	0.0376259	1.25232	+	3.41954	Q9HC16	6	DNA dC->dU-editing enzyme APOBEC-3G	APOBEC3G
14.9698	15.1266	15.9011	17.1958	15.3602	15.8796	16.4935	15.4554	16.4222	14.758	15.7289	15.5486	15.365	15.1025	14.8025	16.2922	15.3903	16.177	17.0673	NA;TISSUE SPECIFICITY: Expressed in peripheral blood leukocytes > bone marrow = spleen > lymph node, and only faintly visible in appendix and thymus. Expressed in the brain, heart, kidney, liver, lung, pancreas, and placenta. Expressed primarily by reticuloendothelial cells: monocytes, macrophages, and endothelial cells. Expressed in atherosclerotic lesion foam cells. {ECO:0000269|PubMed:10191299…	0.324599	0.665964	0.243904		0.732928	A0A4V7I447;Q0VD83;Q0VD83-3	42	Apolipoprotein B receptor;Apolipoprotein B receptor;Isoform 3 of Apolipoprotein B receptor	APOBR
17.0383	18.1255	18.8252	21.1009	18.272	18.0534	18.568	18.7657	17.9066	18.0828	19.355	20.453	19.0046	18.3936	19.0035	18.323	19.3852	18.3091	16.8604	NA;TISSUE SPECIFICITY: Synthesized mainly in liver and to a minor degree in intestine. Also found in the lung and spleen. {ECO:0000269|PubMed:2835369}.	0.168093	0.81191	-0.199745		-0.420959	K7ERI9;P02654	5	Apolipoprotein C-I (Fragment);Apolipoprotein C-I	APOC1
15.6808	15.8063	18.2709	20.3237	17.9518	14.871	17.6187	17.9155	17.3681	17.6225	17.7452	17.3921	16.8455	18.6183	18.5119	16.2749	18.0833	16.8804	18.6891	NA;TISSUE SPECIFICITY: Liver. {ECO:0000269|PubMed:6328445}.	0.255712	0.729739	-0.354455		-0.602193	B0YIW2;P02656	4	Apolipoprotein C-III	APOC3
12.3571	15.7206	18.3764	16.9768	18.1251	16.1347	17.3227	17.6986	17.549	17.7539	17.0871	18.0937	16.6164	17.6928	17.3578	16.8162	18.5016	16.4322	16.5948	NA;TISSUE SPECIFICITY: Liver and intestine. {ECO:0000269|PubMed:6546757}.	0.453037	0.56127	-0.599015		-0.956265	K7ER74;P02655	4	APOC4-APOC2 readthrough (NMD candidate);Apolipoprotein C-II	APOC4-APOC2
17.7589	17.1999	18.5967	21.6911	19.5436	19.1516	20.3332	18.8976	20.2284	17.5328	18.4857	18.5461	17.9046	17.7179	19.8869	18.1409	16.9512	18.9454	19.5361	NA;TISSUE SPECIFICITY: Expressed in liver, intestine, pancreas, kidney, placenta, adrenal, spleen, fetal brain tissue and tears.	0.971114	0.269241	0.902013		1.70249	C9JF17;P05090	6	Apolipoprotein D (Fragment);Apolipoprotein D	APOD
17.4164	16.6759	18.0567	17.4431	18.4372	17.6639	17.9899	18.426	18.564	16.8256	18.2426	17.5507	17.8178	16.6523	17.3341	17.0661	18.8611	16.8349	16.2757	TISSUE SPECIFICITY: Produced by several tissues and cell types and mainly found associated with lipid particles in the plasma, the interstitial fluid and lymph (PubMed:25173806). Mainly synthesized by liver hepatocytes (PubMed:25173806). Significant quantities are also produced in brain, mainly by astrocytes and glial cells in the cerebral cortex, but also by neurons in frontal cortex and hippoca…	0.853965	0.319003	0.506464		1.54828	P02649	25	Apolipoprotein E	APOE
18.571	17.3899	19.1849	19.1095	18.0753	17.871	18.667	18.7844	19.0348	18.5905	18.9267	19.4364	18.4138	17.9205	18.3325	18.5249	17.4463	18.811	17.9449	TISSUE SPECIFICITY: Expressed by the liver and secreted in plasma.	0.121857	0.862313	0.0861273		0.316682	P02749	23	Beta-2-glycoprotein 1	APOH
14.6683	13.5153	15.8285	13.2929	15.9847	15.8841	13.5174	15.6046	15.888	15.308	15.4414	16.7355	15.4	14.9101	15.7593	15.3842	13.9278	14.5202	13.5968	TISSUE SPECIFICITY: Plasma. Found on APOA-I-containing high density lipoprotein (HDL3). Expressed in pancreas, lung, prostate, liver, placenta and spleen.	0.156537	0.82309	-0.189019		-0.395532	O14791;O14791-2;O14791-3	4	Apolipoprotein L1;Isoform 2 of Apolipoprotein L1;Isoform 3 of Apolipoprotein L1	APOL1
17.8815	18.0372	17.2887	18.0416	18.867	17.7215	18.0738	19.2333	18.799	16.809	16.0214	17.3464	16.714	17.2366	16.6353	17.7159	16.6029	17.0223	17.8528	also detected in spleen, liver, kidney, colon, small intestine, uterus, spinal cord, adrenal gland, salivary gland, trachea, mammary gland, skeletal muscle, testis and fetal brain and liver.;NA;the highest levels are found in lung, thymus, pancreas, placenta, adult brain and prostate;TISSUE SPECIFICITY: Widely expressed	3.5154	0.0164	1.22031	+	4.51588	J3KQL8;Q9BQE5	11	Apolipoprotein L2	APOL2
16.2762	15.4686	13.9694	11.7349	17.7671	17.8171	17.1622	15.2754	13.9539	14.1353	12.682	14.0104	13.2322	13.8345	14.5965	14.7274	14.0877	10.9478	12.5305	also detected in kidney, bone marrow, spleen, thymus, spinal cord, adrenal gland, salivary gland, trachea and mammary gland;levels are low in brain, heart, fetal liver, pancreas and testis.;the highest levels are in prostate, lung and placenta;TISSUE SPECIFICITY: Widely expressed	1.81661	0.0846844	2.01323	+	2.69751	O95236;O95236-2	5	Apolipoprotein L3;Isoform 2 of Apolipoprotein L3	APOL3
19.7192	18.2421	20.9723	23.4391	16.6501	21.3088	20.5894	11.3488	11.5019	12.9464	21.7843	20.7534	22.0104	20.4762	23.7674	12.9722	17.1339	19.293	23.6205	TISSUE SPECIFICITY: Expressed in neonatal dermal microvascular endothelial cells. {ECO:0000269|PubMed:15102925}.	0.294503	0.693364	-1.27893		-0.676909	Q96LR9;Q96LR9-2	1	Apolipoprotein L domain-containing protein 1;Isoform 2 of Apolipoprotein L domain-containing protein 1	APOLD1
15.8472	16.8342	17.3539	17.0426	18.2364	17.1841	17.7924	17.9107	17.7631	17.1772	17.9201	18.772	17.7022	17.1624	18.535	16.2011	15.166	16.8082	16.9809	NA;TISSUE SPECIFICITY: Plasma protein. Expressed in liver and kidney.	0.0757433	0.913405	0.0868782		0.205065	O95445;O95445-2;Q5SRP5	4	Apolipoprotein M;Isoform 2 of Apolipoprotein M;Apolipoprotein M	APOM
16.3915	15.5346	14.5246	12.3715	16.459	16.9294	19.2616	14.8662	19.6422	14.1817	14.086	16.6969	13.6208	13.9022	15.0224	15.3623	15.1711	15.6199	16.5202	NA;TISSUE SPECIFICITY: Expressed in all tissues examined. Up-regulated in diabetic heart. {ECO:0000269|PubMed:16956892}.	0.816163	0.337522	1.20174		1.49712	H7C1U8;Q9BUR5	4	MICOS complex subunit (Fragment);MICOS complex subunit MIC26	APOO
18.2998	16.5241	17.6611	17.9993	17.8126	17.9991	18.4032	17.0871	18.4741	17.9749	18.2738	18.3106	16.9865	18.5614	18.1236	17.1793	17.6353	17.919	19.3388	NA	0.326384	0.665017	-0.223605		-0.7362	A0A087WYF7;Q6UXV4	15	MICOS complex subunit;MICOS complex subunit MIC27	APOOL
15.4416	15.7692	15.7912	17.6198	16.627	17.27	17.4787	15.999	17.7544	17.5567	16.0605	16.1051	16.4001	16.063	17.1138	15.471	16.4982	15.2637	15.7201	TISSUE SPECIFICITY: Expressed in the brain and in cerebrospinal fluid (at protein level) (PubMed:2649245). Expressed in all fetal tissues examined with highest levels in brain, kidney, heart and spleen. Weak expression in liver. In adult brain, highest expression found in the frontal lobe of the cortex and in the anterior perisylvian cortex-opercular gyri. Moderate expression in the cerebellar co…	0.551554	0.489282	0.413779		1.11388	P05067;P05067-9	24	Amyloid-beta precursor protein;Isoform L-APP752 of Amyloid-beta precursor protein	APP
17.4443	16.6428	17.8147	17.6897	17.7876	17.8351	17.9288	18.4278	17.653	16.5081	17.3061	17.3907	17.1726	16.7268	17.538	17.2718	16.4751	17.0996	17.4164	TISSUE SPECIFICITY: High levels in heart, ovary, pancreas and skeletal muscle. {ECO:0000269|PubMed:10490823}.	2.13478	0.056878	0.601007	+	3.04405	Q9UKG1	33	DCC-interacting protein 13-alpha	APPL1
15.6032	15.9505	16.5981	17.6866	16.2939	16.1219	16.8667	16.0939	17.1165	16.5548	17.9034	15.968	16.1657	15.8013	16.865	16.7573	16.3876	17.1967	17.5299	TISSUE SPECIFICITY: High levels in brain, heart, kidney and skeletal muscle. {ECO:0000269|PubMed:11431708}.	0.337793	0.654955	-0.231727		-0.756994	Q8NEU8	28	DCC-interacting protein 13-beta	APPL2
17.6472	17.7017	17.185	18.1143	17.389	17.3426	16.3816	15.9436	17.5892	16.938	17.5852	16.2001	17.4054	17.5639	16.0557	16.7801	16.7606	16.4942	17.4662	NA	0.576727	0.474183	0.329973		1.15262	P07741	11	Adenine phosphoribosyltransferase	APRT
13.5547	15.7589	14.8542	12.4263	11.8686	15.0312	14.4275	14.8645	13.9506	12.7192	12.5775	12.8823	12.472	12.6994	12.965	15.3647	15.0462	13.5157	11.8491	detected in liver, kidney and lymph node (at protein level) (PubMed:14755728). Isoform 1 is highly expressed in the cerebral cortex and cerebellum, compared to isoform 2 (at protein level) (PubMed:14755728). Widely expressed;detected throughout the brain, in liver, kidney, skeletal muscle, fibroblasts, lymphocytes and pancreas (PubMed:15276230, PubMed:11586299, PubMed:11586300). {ECO:0000269|PubM…	NaN	1	0		NaN	C9J8U3;Q7Z2E3;Q7Z2E3-10;Q7Z2E3-4;Q7Z2E3-5;Q7Z2E3-7	3	Aprataxin;Aprataxin;Isoform 10 of Aprataxin;Isoform 4 of Aprataxin;Isoform 5 of Aprataxin;Isoform 7 of Aprataxin	APTX
13.9173	11.7506	14.5785	12.6884	14.303	13.6667	17.9816	15.3879	17.7945	14.9492	16.5774	16.89	17.1571	17.5676	16.2293	13.4322	12.4619	11.7545	14.3477	NA;TISSUE SPECIFICITY: Detected in erythrocytes (at protein level). Expressed in a number of tissues including erythrocytes, renal tubules, retinal pigment epithelium, heart, lung, skeletal muscle, kidney and pancreas. Weakly expressed in brain, placenta and liver. {ECO:0000269|PubMed:23219802}.	0.196904	0.783524	-0.462409		-0.482691	A0A494C115;K7N7A8;P29972;P29972-2;P29972-3;P29972-4	2	Aquaporin-1 (Fragment);DUF4205 domain-containing protein (Fragment);Aquaporin-1;Isoform 2 of Aquaporin-1;Isoform 3 of Aquaporin-1;Isoform 4 of Aquaporin-1	AQP1
15.7613	16.6482	16.0446	17.9532	16.9937	16.8773	16.8536	16.7225	17.7567	16.0524	15.5307	16.1004	15.5818	15.5065	15.7592	15.9037	16.7673	15.5737	17.4943	NA	1.77661	0.0893884	0.818659	+	2.65329	O60306	35	RNA helicase aquarius	AQR
14.2849	14.8486	13.9895	18.1553	14.6016	14.3933	15.0066	15.6317	16.2027	15.5594	15.1886	14.6431	14.0316	15.1939	14.6788	14.8023	14.726	15.4215	16.4033	TISSUE SPECIFICITY: Predominantly in urogenital tissues.	0.144399	0.837442	0.170055		0.368382	P10398;Q96II5	9	Serine/threonine-protein kinase A-Raf;ARAF protein	ARAF
15.443	15.1697	15.215	15.2914	15.6452	15.201	15.6346	15.5405	15.2652	15.9724	15.4807	15.1611	15.6101	15.6174	15.3743	15.1646	14.8632	14.6006	15.5406	TISSUE SPECIFICITY: Detected in heart, skeletal muscle, spleen, kidney, liver, placenta, lung, peripheral blood leukocytes, adrenal gland, bone marrow, brain, lymph node, mammary gland, prostate, spinal cord, stomach, thyroid and trachea. {ECO:0000269|PubMed:11804590}.	0.102814	0.882945	0.0398922		0.271604	Q96P48;Q96P48-3	27	Arf-GAP with Rho-GAP domain, ANK repeat and PH domain-containing protein 1;Isoform 3 of Arf-GAP with Rho-GAP domain, ANK repeat and PH domain-containing protein 1	ARAP1
13.2402	13.652	13.5201	12.4664	12.9556	14.0359	13.3469	12.8049	13.0919	13.1093	14.0005	12.841	12.8428	13.8915	12.8285	10.2067	14.2722	13.3967	12.2527	NA	NaN	1	0		NaN	G5E9Y3;Q8WWN8	5	Arf-GAP with Rho-GAP domain, ANK repeat and PH domain-containing protein 3;Arf-GAP with Rho-GAP domain, ANK repeat and PH domain-containing protein 3	ARAP3
19.1116	19.3862	20.2464	20.1339	19.5614	19.4849	19.5453	19.902	19.7625	20.2844	21.1673	19.3669	19.9714	19.7909	19.4852	20.3807	20.0055	20.2163	20.6945	NA;TISSUE SPECIFICITY: Ubiquitously expressed.	1.3097	0.167631	-0.454742		-2.12011	B0YIW6;P48444	40	Coatomer subunit delta	ARCN1
21.2443	22.0858	21.4773	21.6841	20.7374	20.6935	20.1704	20.1695	19.8958	19.4025	20.1447	19.277	19.6616	18.391	18.9771	20.7096	20.855	21.0928	21.4981	NA	1.35741	0.156021	0.905516	+	2.17641	P84077	17	ADP-ribosylation factor 1	ARF1
20.0971	20.2962	19.8571	20.7525	20.355	20.1535	21.295	20.3796	22.3364	17.2487	18.8188	15.773	17.5689	17.3485	17.7732	20.3729	19.0986	20.0718	20.0079	NA	2.98765	0.023397	2.20538	+	3.95201	C9JAK5	7	ADP-ribosylation factor 4	ARF4
17.9947	18.7514	17.9925	17.8551	18.2493	18.3423	18.7548	17.3712	19.4387	17.035	16.0863	16.5454	16.966	16.0148	17.5579	17.4544	17.7997	18.3198	19.8412	NA	1.38876	0.149808	0.943497	+	2.21314	P84085	5	ADP-ribosylation factor 5	ARF5
17.2697	17.8087	18.0496	17.9791	18.2107	17.8853	19.6983	17.8248	19.1504	17.8947	18.7585	17.7181	18.0689	17.6985	17.1332	17.3768	17.8065	17.4617	17.8261	TISSUE SPECIFICITY: Ubiquitous, with higher levels in heart, substantia nigra, and kidney. {ECO:0000269|PubMed:14659046}.	0.863851	0.315538	0.434221		1.56154	P62330	13	ADP-ribosylation factor 6	ARF6
16.819	17.7304	15.585	17.7774	16.9123	16.9164	16.3273	15.8376	16.7694	16.1336	15.9851	16.2538	15.845	16.0249	15.7416	16.8692	16.0166	15.4075	16.5681	NA	1.56162	0.120431	0.657105	+	2.41221	Q8N6T3	13	ADP-ribosylation factor GTPase-activating protein 1	ARFGAP1
17.268	17.9162	16.3328	18.2	16.5174	17.2484	17.5139	16.6773	17.5523	17.0817	17.0273	16.4797	16.4134	16.7293	16.4926	17.3403	17.2956	16.8855	18.1895	NA	0.446969	0.565163	0.253881		0.946208	Q8N6H7	26	ADP-ribosylation factor GTPase-activating protein 2	ARFGAP2
15.585	16.5143	14.2542	16.8331	15.1044	15.5232	15.4036	15.9272	16.3395	15.6237	15.5101	14.5362	14.8619	15.1788	14.5429	16.4342	15.7999	15.8109	16.0722	TISSUE SPECIFICITY: Widely expressed. Highest expression in endocrine glands (pancreas, pituitary gland, salivary gland, and prostate) and testis with a much higher expression in the testis than in the ovary. {ECO:0000269|PubMed:10704287}.	0.397401	0.605855	0.283432		0.86235	Q9NP61	16	ADP-ribosylation factor GTPase-activating protein 3	ARFGAP3
16.149	17.8258	17.1391	17.7248	16.7393	17.5213	17.2287	16.1426	17.3492	17.0071	17.6348	16.8512	16.7966	16.9297	17.5501	17.3165	16.9283	17.3103	16.9607	TISSUE SPECIFICITY: Expressed in placenta, lung, heart, brain, kidney and pancreas.	0.0616922	0.927385	-0.0374301		-0.169277	Q9Y6D6	46	Brefeldin A-inhibited guanine nucleotide-exchange protein 1	ARFGEF1
14.2797	15.8457	14.3435	15.0694	14.1879	14.8501	15.099	13.7909	15.0859	14.3733	15.4754	14.9496	15.8139	14.4258	15.1965	15.5473	14.0366	14.8704	14.1018	TISSUE SPECIFICITY: Expressed in placenta, lung, heart, brain, kidney and pancreas.	0.216223	0.7652	-0.151066		-0.522856	Q9Y6D5	25	Brefeldin A-inhibited guanine nucleotide-exchange protein 2	ARFGEF2
15.6903	15.5859	14.5675	14.0333	12.3148	14.8804	14.5651	13.5848	15.6515	14.6337	16.1433	17.7254	14.7789	13.2641	13.1552	14.5778	14.0918	14.42	15.0024	TISSUE SPECIFICITY: Expressed in breast cancer cell lines. Not expressed in normal tissues such as duct, mammary gland, lung, heart, liver, kidnay, bone marrow. {ECO:0000269|PubMed:19496786}.	0.166651	0.813313	-0.23776		-0.417809	Q5TH69	26	Brefeldin A-inhibited guanine nucleotide-exchange protein 3	ARFGEF3
18.0306	19.0337	17.0476	19.0108	17.8382	17.7997	18.6379	17.0151	18.2137	18.2282	18.0809	16.8193	16.908	17.3019	17.9145	18.1902	17.5636	17.74	18.3479	TISSUE SPECIFICITY: Ubiquitously expressed. Higher levels in liver, pancreas, placenta, skeletal muscle and heart.	0.613784	0.450167	0.360261		1.20865	P53367	18	Arfaptin-1	ARFIP1
13.589	14.2898	14.5489	14.4743	11.8125	13.846	16.1629	13.3722	16.1762	14.4891	14.8864	12.9113	15.469	13.2952	13.7125	14.4846	13.4858	13.2405	12.2098	NA	0.361584	0.634842	0.434031		0.799684	A0A087X1E4;P53365	10	Arfaptin-2	ARFIP2
14.4674	14.8753	13.8983	16.5771	12.2536	14.5926	15.5948	13.5391	15.8387	14.4409	14.3144	13.4165	12.3768	14.515	14.6349	15.3621	15.1163	14.6269	16.7102	TISSUE SPECIFICITY: Found in most tissues.	0.047969	0.94114	0.0749021		0.133419	Q13795	3	ADP-ribosylation factor-related protein 1	ARFRP1
14.6832	15.2369	14.2533	14.2923	14.6582	14.7603	15.7592	12.9871	13.9977	13.5278	14.7457	14.9187	15.4454	13.8913	13.9356	13.8001	13.3047	14.9355	12.6226	TISSUE SPECIFICITY: Within the immune system initially reported to be selectively expressed in granulocytes (polymorphonuclear leukocytes [PMNs]) (PubMed:15546957). Also detected in macrophages mycobacterial granulomas (PubMed:23749634). Expressed in group2 innate lymphoid cells (ILC2s) during lung disease (PubMed:27043409). {ECO:0000269|PubMed:15546957, ECO:0000269|PubMed:23749634}.	0.510307	0.520833	0.401515		1.04912	P05089;P05089-2	5	Arginase-1;Isoform 2 of Arginase-1	ARG1
18.5491	19.4368	18.2914	22.1276	19.0675	19.3053	19.5378	18.3631	19.2233	18.5354	17.9459	18.1263	18.2951	18.4109	18.4039	18.4412	19.3965	18.2687	20.8422	NA	0.760684	0.365579	0.655819		1.42063	Q9NWB6	9	Arginine and glutamate-rich protein 1	ARGLU1
20.0387	19.2494	19.8471	20.271	20.2112	19.1393	19.9166	20.6472	19.8341	19.4647	19.8353	19.7987	19.4901	19.6292	18.7716	19.2128	19.373	19.1143	20.4831	TISSUE SPECIFICITY: Ubiquitous.	1.04266	0.242251	0.38877		1.79384	Q07960	31	Rho GTPase-activating protein 1	ARHGAP1
15.8098	14.3988	13.9303	13.7335	16.771	14.6465	17.2673	15.9562	18.2406	15.2341	14.8064	16.2243	14.8967	15.5247	15.7466	12.9761	11.633	12.4841	12.2042	TISSUE SPECIFICITY: High levels of expression in heart and skeletal muscle. {ECO:0000269|PubMed:11432776}.	1.17635	0.202994	1.46631		1.95978	A1A4S6	13	Rho GTPase-activating protein 10	ARHGAP10
15.8284	16.2811	15.0454	14.8539	19.1861	15.148	16.0666	14.9018	17.22	16.1105	16.2538	15.615	15.4389	15.127	15.6753	15.3894	14.9599	15.0433	16.3762	NA	0.460216	0.554598	0.460092		0.968105	Q1RLN5;Q8IWW6;Q8IWW6-3;Q8IWW6-4	16	ARHGAP12 protein;Rho GTPase-activating protein 12;Isoform 3 of Rho GTPase-activating protein 12;Isoform 4 of Rho GTPase-activating protein 12	ARHGAP12
11.0926	11.5909	12.6594	12.6177	12.0698	12.6007	12.4312	11.3601	13.9196	13.1886	12.3166	13.4319	11.7351	11.7905	11.4454	11.2138	11.4886	12.4982	12.2955	TISSUE SPECIFICITY: Expressed in lung, liver and lymphoid cells. {ECO:0000269|PubMed:12650940}.	NaN	1	0		NaN	Q53QZ3	1	Rho GTPase-activating protein 15	ARHGAP15
17.8244	18.3579	16.5725	17.3535	17.5901	18.1598	17.9896	16.5973	17.9804	17.6016	16.4306	16.0903	16.5017	16.8181	16.5841	16.7381	16.3648	16.7175	17.0071	NA	2.77289	0.0279853	0.917438	+	3.72415	Q8N392;Q8N392-2	14	Rho GTPase-activating protein 18;Isoform 2 of Rho GTPase-activating protein 18	ARHGAP18
12.6611	13.6401	12.5174	8.65308	12.892	13.3325	14.6115	13.5882	14.6591	14.5185	13.6028	12.8666	13.892	14.5614	12.0772	13.1555	12.4965	13.3873	13.8279	TISSUE SPECIFICITY: Widely expressed with higher expression in brain, heart, skeletal muscle and placenta. {ECO:0000269|PubMed:12056806}.	0.351312	0.643277	-0.488006		-0.781361	Q5T5U3	16	Rho GTPase-activating protein 21	ARHGAP21
14.8574	15.8124	14.3635	16.7521	15.7335	15.2901	16.1755	16.584	16.2248	14.6986	16.3276	15.0205	16.569	16.2256	13.5291	15.4699	13.2601	14.9209	16.744	NA	0.477529	0.54272	0.47828		0.996416	P42331;P42331-3;P42331-4;P42331-6	9	Rho GTPase-activating protein 25;Isoform 3 of Rho GTPase-activating protein 25;Isoform 4 of Rho GTPase-activating protein 25;Isoform 6 of Rho GTPase-activating protein 25	ARHGAP25
15.6037	16.3296	16.0959	16.4996	16.1894	16.3942	16.0851	15.6864	17.1629	15.3809	16.709	15.5817	15.9448	15.9537	16.0736	16.0131	15.5836	16.0457	15.3251	NA	1.07326	0.231959	0.366298		1.83234	Q9UNA1;Q9UNA1-2	13	Rho GTPase-activating protein 26;Isoform 2 of Rho GTPase-activating protein 26	ARHGAP26
14.8307	16.3808	15.5403	12.7943	13.9303	15.2469	15.2062	15.0353	16.4943	16.7193	16.3228	13.3476	15.0834	12.814	16.2112	15.4674	15.616	15.2584	20.2473	NA;TISSUE SPECIFICITY: Expressed in germinal center B-cell, spleen, chronic lymphocytic leukemia, pancreatic cancer and lung cancer. {ECO:0000269|PubMed:15492870}.	0.394376	0.607034	-0.657715		-0.857127	A0A0G2JNY3;A0A0G2JRG8;E9PIR1;E9PNT2;Q6ZUM4;Q6ZUM4-2	9	Rho GTPase-activating protein 27;Rho GTPase-activating protein 27;Rho GTPase-activating protein 27;Rho GTPase-activating protein 27;Rho GTPase-activating protein 27;Isoform 2 of Rho GTPase-activating protein 27	ARHGAP27
14.9346	15.0485	16.1475	14.5268	16.9028	16.0045	17.6536	15.6134	17.5493	14.5729	13.6206	13.8607	13.6355	14.9703	13.8178	16.1167	13.334	14.6846	13.5847	NA	3.00176	0.0231385	1.82255	+	3.967	Q7Z6I6	10	Rho GTPase-activating protein 30	ARHGAP30
13.7655	13.3532	13.7471	14.4523	14.9056	13.6861	15.2436	15.1127	15.577	14.1974	14.7614	14.4633	14.3684	14.9379	14.4774	13.6331	13.3244	13.644	13.3793	NA	0.454482	0.560523	0.308331		0.958652	Q2M1Z3	12	Rho GTPase-activating protein 31	ARHGAP31
16.0207	16.261	15.7737	18.0972	17.0651	17.0479	17.949	15.9513	18.1012	15.9516	15.3331	14.7843	15.8347	14.6549	15.4242	16.3953	16.1394	16.1895	17.4591	TISSUE SPECIFICITY: Isoform 1 and isoform 2 are highly expressed in brain and testis. Isoform 1 is also expressed in other tissues such as lung, liver and spleen. {ECO:0000269|PubMed:12446789}.	1.81366	0.0850011	1.10194	+	2.69425	A7KAX9;A7KAX9-2	18	Rho GTPase-activating protein 32;Isoform 2 of Rho GTPase-activating protein 32	ARHGAP32
15.8838	17.1482	16.9352	17.0989	17.9763	16.6352	18.374	16.5552	19.4144	16.7582	17.805	16.3963	16.84	16.6583	17.8101	15.9817	16.474	16.4381	15.7693	TISSUE SPECIFICITY: Detected in neutrophils (at protein level). {ECO:0000269|PubMed:1894621}.	0.876732	0.308741	0.642578		1.57874	Q9NRY4	18	Rho GTPase-activating protein 35	ARHGAP35
16.7791	16.996	15.5404	17.7237	16.7417	15.9645	17.4991	15.6777	16.8801	15.3981	15.3314	15.7159	15.9179	15.6005	15.998	17.0578	14.5636	15.9542	17.3104	low levels in placenta, lung and various fetal tissues.;NA;TISSUE SPECIFICITY: Predominantly in hematopoietic cells (spleen, thymus and leukocytes)	1.29294	0.171611	0.759914		2.1002	E7EQN5;P98171;P98171-2	25	Rho GTPase-activating protein 4;Rho GTPase-activating protein 4;Isoform 2 of Rho GTPase-activating protein 4	ARHGAP4
16.3843	16.0582	12.0764	14.0624	16.6053	15.1277	13.1285	16.314	17.7615	14.9935	14.4049	12.8671	16.5628	13.0159	13.2912	11.9072	11.7787	14.5949	13.0253	NA;TISSUE SPECIFICITY: Highly and selectively expressed in smooth muscle cells. {ECO:0000269|PubMed:24335996}.	NaN	1	0		NaN	A6NI28;E9PJK4	2	Rho GTPase-activating protein 42	ARHGAP42
12.8395	12.1332	10.6714	14.5034	12.9716	12.477	14.8668	10.6581	14.2809	13.7788	12.1463	12.5589	12.5943	9.53226	13.9336	9.72657	10.1087	9.66694	12.0652	NA;TISSUE SPECIFICITY: Highly expressed in brain. Expressed at weak level in other tissues. {ECO:0000269|PubMed:11431473}.	NaN	1	0		NaN	E7ERK8;F5H6L3;Q17R89;Q17R89-2;Q17R89-3	2	Rho GTPase-activating protein 44;Rho GTPase-activating protein 44;Rho GTPase-activating protein 44;Isoform 2 of Rho GTPase-activating protein 44;Isoform 3 of Rho GTPase-activating protein 44	ARHGAP44
15.8733	15.7764	15.2087	15.3906	15.4908	15.7249	16.7718	16.3112	17.1243	15.7918	15.372	15.8548	15.7461	15.955	15.5935	15.4936	13.2019	15.2637	15.0334	TISSUE SPECIFICITY: Expressed on cells of the hematopoietic lineage. Detected in dendritic cells and epidermal Langerhans cells. Expressed in peripheral blood mononuclear cells, in all leukemia/lymphoma cell lines. Detected also in some solid tumors and tissues such as cancerous and non-cancerous tissue. {ECO:0000269|PubMed:11965046, ECO:0000269|PubMed:8843592}.	1.11261	0.220969	0.632964		1.88138	Q92619	20	Rho GTPase-activating protein 45	ARHGAP45
15.0112	14.9111	14.9177	15.5716	12.3917	12.9877	15.1349	14.3009	16.3022	15.9001	15.4769	16.1309	15.5002	15.8267	15.0151	13.3887	14.5522	12.8593	16.1973	NA;TISSUE SPECIFICITY: Detected in skin fibroblasts (at protein level) (PubMed:8537347). {ECO:0000269|PubMed:8537347}.	0.396497	0.606295	-0.470419		-0.86079	A0A0A0MSK6;Q13017;Q13017-2	20	Rho GTPase-activating protein 5;Rho GTPase-activating protein 5;Isoform 2 of Rho GTPase-activating protein 5	ARHGAP5
12.4905	12.563	12.4965	11.9146	12.0102	12.7265	12.9112	13.5524	13.6118	13.8315	12.4753	13.5824	13.3091	13.1901	13.8299	11.4868	11.3885	12.5876	13.1772	TISSUE SPECIFICITY: Highly expressed in kidney, heart and skeletal muscle followed by retina, lymphoblast, placenta, lung, brain, pancreas and liver.	NaN	1	0		NaN	O43182;O43182-4	2	Rho GTPase-activating protein 6;Isoform 4 of Rho GTPase-activating protein 6	ARHGAP6
12.5401	12.6493	12.7724	15.0161	12.3751	13.2071	14.7634	14.5	15.1442	15.5398	13.2777	14.0834	13.7724	12.9629	13.4248	13.7822	11.591	12.6091	12.6345	NA;TISSUE SPECIFICITY: Predominantly expressed in peripheral blood leukocytes, spleen, and thymus. {ECO:0000269|PubMed:11396949}.	0.24433	0.738802	0.29529		0.579684	J3KPQ4;Q9BRR9;Q9BRR9-2;Q9BRR9-3;Q9BRR9-4;Q9BRR9-5;R4GN15	2	Rho GTPase activating protein 9, isoform CRA_a;Rho GTPase-activating protein 9;Isoform 2 of Rho GTPase-activating protein 9;Isoform 3 of Rho GTPase-activating protein 9;Isoform 4 of Rho GTPase-activating protein 9;Isoform 5 of Rho GTPase-activating protein 9;Rho GTPase-activating protein 9	ARHGAP9
19.5867	19.3707	19.1678	20.5956	19.5222	18.6991	19.3103	19.7764	19.7638	19.2932	19.3899	19.8848	19.8634	19.4067	20.085	19.1234	18.8795	19.2106	19.713	NA	0.0851211	0.904131	0.0475544		0.228461	P52565	24	Rho GDP-dissociation inhibitor 1	ARHGDIA
19.5724	20.1312	19.4615	20.0655	20.085	19.4765	20.2429	20.3127	20.5401	19.6496	20.3347	19.8439	20.5412	19.7883	20.0499	20.0031	18.3878	19.753	19.8481	TISSUE SPECIFICITY: Detected in bone marrow, thymus and spleen. {ECO:0000269|PubMed:8356058}.	0.325996	0.664926	0.167593		0.735489	P52566	26	Rho GDP-dissociation inhibitor 2	ARHGDIB
17.2635	18.2588	17.5462	19.5654	17.6049	17.5544	18.8872	18.2457	19.4656	17.7803	17.3282	17.2648	17.8386	17.0972	17.5123	17.6735	17.9938	17.1956	19.1827	NA	0.974295	0.268002	0.579033		1.70659	M0QZR4	41	Rho guanine nucleotide exchange factor 1	ARHGEF1
14.993	15.5773	15.0813	18.716	16.7076	14.1306	14.8294	14.7861	15.7547	16.171	16.4692	17.3241	15.8229	16.2013	18.1104	14.2529	14.8752	14.4966	15.4451	NA	0.205674	0.77588	-0.297316		-0.50104	H0YAN8;O15013;O15013-4;O15013-5;O15013-6;O15013-7	11	Rho guanine nucleotide exchange factor 10 (Fragment);Rho guanine nucleotide exchange factor 10;Isoform 4 of Rho guanine nucleotide exchange factor 10;Isoform 5 of Rho guanine nucleotide exchange factor 10;Isoform 2 of Rho guanine nucleotide exchange factor 10;Isoform 3 of Rho guanine nucleotide exchange factor 10	ARHGEF10
16.2389	16.6825	16.8637	15.8053	15.5435	17.1089	16.0305	16.0935	16.0017	16.4174	16.5538	15.4853	15.894	15.6565	15.6716	17.1143	16.3061	16.4795	15.482	TISSUE SPECIFICITY: Detected in heart, liver, skeletal muscle, kidney and pancreas. {ECO:0000269|PubMed:16112081}.	0.27582	0.710485	0.157141		0.641294	Q9HCE6;Q9HCE6-2;Q9HCE6-3	22	Rho guanine nucleotide exchange factor 10-like protein;Isoform 2 of Rho guanine nucleotide exchange factor 10-like protein;Isoform 3 of Rho guanine nucleotide exchange factor 10-like protein	ARHGEF10L
21.4079	21.4428	21.6021	22.2051	21.8251	21.5081	20.2937	22.3947	17.944	21.7466	21.5714	21.8695	21.9243	21.6709	21.3184	21.6662	21.5949	22.007	22.142	TISSUE SPECIFICITY: Ubiquitously expressed. {ECO:0000269|PubMed:10026210}.	0.687422	0.404547	-0.570702		-1.31678	O15085	25	Rho guanine nucleotide exchange factor 11	ARHGEF11
15.1448	14.9972	15.4297	17.8195	15.5469	15.3833	15.9375	15.5643	16.2285	15.4991	15.3933	15.6619	14.9651	15.3168	15.2877	14.6712	15.0975	15.0035	16.8471	NA;TISSUE SPECIFICITY: Ubiquitously expressed. Isoform 2 is found in jejunum and testis.	0.626979	0.440503	0.409212		1.22833	E9PMR6;Q9NZN5;Q9NZN5-2	22	Rho guanine nucleotide exchange factor 12;Rho guanine nucleotide exchange factor 12;Isoform 2 of Rho guanine nucleotide exchange factor 12	ARHGEF12
15.94	17.2018	16.9279	16.3687	18.2727	17.3254	16.195	14.1726	16.572	17.3886	17.7281	15.7249	16.2018	16.9285	16.7994	16.694	16.4651	17.2107	17.622	NA	0.348613	0.64625	-0.323401		-0.77652	Q5VV41	19	Rho guanine nucleotide exchange factor 16	ARHGEF16
16.6474	16.0185	15.6596	18.1376	17.0914	15.7162	17.3361	17.4348	17.0435	15.9156	15.6192	16.1349	15.9812	16.118	16.2185	14.3706	15.2434	15.0361	17.6207	TISSUE SPECIFICITY: Highly expressed in the heart. {ECO:0000269|PubMed:12071859}.	1.59117	0.116007	0.961422	+	2.44573	Q96PE2	37	Rho guanine nucleotide exchange factor 17	ARHGEF17
14.3666	15.3271	14.0728	12.2526	14.4802	14.9155	15.5271	14.2076	14.8911	15.001	14.3544	12.7101	14.7262	14.7373	13.5716	13.9874	13.5345	14.2328	15.5792	NA;TISSUE SPECIFICITY: Expressed in all tissues tested with highest expression in kidney and pancreas. Weakly or not expressed in liver, skeletal muscle and testis. Isoform 1: Expressed in eosinophils (PubMed:29601110). Isoform 2: Expressed in eosinophils (PubMed:29601110). Isoform 3: Expressed in eosinophils (PubMed:29601110). Isoform 4: Not detected in eosinophils (PubMed:29601110). {ECO:000026…	0.205246	0.77609	0.205513		0.500149	A0A087WZG4;A0A3B3IPE9;A0A590UK10;Q6ZSZ5;Q6ZSZ5-1;Q6ZSZ5-2;Q6ZSZ5-5;Q6ZSZ5-6	10	Rho guanine nucleotide exchange factor 18;Rho guanine nucleotide exchange factor 18;Rho guanine nucleotide exchange factor 18 (Fragment);Rho guanine nucleotide exchange factor 18;Isoform 5 of Rho guanine nucleotide exchange factor 18;Isoform 4 of Rho guanine nucleotide exchange factor 18;Isoform 2 of Rho guanine nucleotide exchange factor 18;Isoform 3 of Rho guanine nucleotide exchange factor 18	ARHGEF18
16.5067	17.0197	16.3256	17.612	17.3033	16.4224	18.4627	17.363	19.1088	16.8292	15.6593	15.65	16.2109	16.0239	15.7718	16.2726	16.5384	16.121	17.9235	NA	1.90168	0.0752175	1.04708	+	2.791	A0A5F9ZI21;Q92974;Q92974-2;Q92974-3;V9GYM8	35	Rho guanine nucleotide exchange factor 2;Rho guanine nucleotide exchange factor 2;Isoform 2 of Rho guanine nucleotide exchange factor 2;Isoform 3 of Rho guanine nucleotide exchange factor 2;Rho guanine nucleotide exchange factor 2	ARHGEF2
11.2037	13.0318	14.8167	13.2245	16.0698	12.3129	12.8413	14.3316	12.6618	13.9921	13.1439	12.0545	11.9755	13.3618	13.4227	11.8713	11.0405	11.3273	13.1537	TISSUE SPECIFICITY: Isoform 1 and isoform 2 are highly expressed in excitable tissues, such as brain, heart and muscle. Also detected in kidney and liver. {ECO:0000269|PubMed:11861769, ECO:0000269|PubMed:12547822, ECO:0000269|PubMed:15069594}.	NaN	1	0		NaN	Q86VW2;Q86VW2-2;Q86VW2-3	1	Rho guanine nucleotide exchange factor 25;Isoform 2 of Rho guanine nucleotide exchange factor 25;Isoform 3 of Rho guanine nucleotide exchange factor 25	ARHGEF25
15.4959	13.7842	13.635	12.0267	13.1552	15.1443	14.2011	14.8656	13.6969	14.6624	14.9358	15.6132	14.5949	15.2939	15.6142	13.2011	12.4217	14.1387	16.2919	NA	0.68001	0.409763	-0.676242		-1.30607	A1IGU5	9	Rho guanine nucleotide exchange factor 37	ARHGEF37
13.5062	13.4522	14.1042	12.7497	14.7639	12.6575	16.0516	14.5508	15.7581	13.5101	13.8412	12.8024	14.1776	15.1044	15.0863	13.0739	13.5371	13.6379	13.697	TISSUE SPECIFICITY: Expressed at higher level in the central nervous system and skeletal muscle and greater abundance in fetal than adult brain (at protein level). {ECO:0000269|PubMed:16143467}.	0.316851	0.673229	0.330353		0.718659	Q8TER5;Q8TER5-3;Q8TER5-4	16	Rho guanine nucleotide exchange factor 40;Isoform 3 of Rho guanine nucleotide exchange factor 40;Isoform 4 of Rho guanine nucleotide exchange factor 40	ARHGEF40
14.8857	15.7079	14.4545	15.2758	12.7131	15.0208	15.6526	13.7073	15.1728	15.1745	14.4075	12.3141	14.2227	14.2764	14.2844	14.6229	14.4523	14.6055	15.339	NA	0.409094	0.595763	0.362344		0.882419	A0A2R8YF49	27	Rho guanine nucleotide exchange factor 5	ARHGEF5
14.4434	14.9312	14.534	14.7079	15.5035	14.7951	15.9221	15.477	16.299	15.1322	14.9608	14.8033	15.3877	15.1232	14.4954	14.7791	13.7117	14.6809	13.9975	TISSUE SPECIFICITY: Ubiquitous.	1.0123	0.252887	0.472069		1.75531	Q15052	21	Rho guanine nucleotide exchange factor 6	ARHGEF6
16.2448	16.5124	16.1447	17.8653	16.0746	15.2848	15.881	16.8842	15.786	17.3766	16.7659	16.4872	16.5985	17.0458	16.8751	15.5503	16.2981	16.0303	17.3739	NA	0.562034	0.482997	-0.342641		-1.13008	B1ALK7;Q14155-1	32	Rho guanine nucleotide exchange factor 7;Isoform 1 of Rho guanine nucleotide exchange factor 7	ARHGEF7
12.9861	13.3516	14.4036	12.0352	12.9805	14.3673	13.4846	14.5786	12.663	13.3067	13.1515	12.0287	13.5081	12.8359	13.6428	13.3017	12.2378	13.5123	12.8695	NA;TISSUE SPECIFICITY: Detected in brain. Detected at low levels in heart. {ECO:0000269|PubMed:10559246}.	0.592017	0.463047	0.388326		1.17588	A0A0A6YYB3;A0A0A6YYF8;A0A1B0GV82;A0A1B0GV84;A0A1B0GVC4;A0A1B0GVV2;A0A1B0GWI5;A0A5F9ZGZ3;A0A5F9ZHY9;B1AMR3;B1AMR4;O43307;O43307-2;O43307-3	2	Rho guanine nucleotide exchange factor 9;Rho guanine nucleotide exchange factor 9;Rho guanine nucleotide exchange factor 9;Rho guanine nucleotide exchange factor 9;Rho guanine nucleotide exchange factor 9;Rho guanine nucleotide exchange factor 9;Rho guanine nucleotide exchange factor 9;Rho guanine nucleotide exchange factor 9;Cdc42 guanine nucleotide exchange factor (GEF) 9, isoform CRA_a;Rho gua…	ARHGEF9
14.7804	15.3529	14.6514	15.0805	16.0123	15.9655	16.6598	15.3329	16.188	15.6939	15.2617	15.1363	15.247	15.2898	15.4677	14.7785	15.5529	14.4196	15.5503	TISSUE SPECIFICITY: Highly expressed in spleen, thymus, prostate, testis, ovary, small intestine, colon, and PBL, and at a much lower level in heart, brain, placenta, lung, liver, skeletal muscle, kidney, and pancreas. {ECO:0000269|PubMed:11073988, ECO:0000269|PubMed:11318604, ECO:0000269|PubMed:12200431}.	0.653518	0.42509	0.318433		1.26749	O14497	27	AT-rich interactive domain-containing protein 1A	ARID1A
15.5607	15.8672	13.5909	15.8507	15.3235	15.6111	16.612	15.0331	16.5805	15.8741	14.5948	15.2573	14.9667	15.3431	14.6076	14.8655	15.0107	13.6972	17.0399	NA;TISSUE SPECIFICITY: Widely expressed with high levels in heart, skeletal muscle and kidney. {ECO:0000269|PubMed:11988099, ECO:0000269|PubMed:12200431, ECO:0000269|PubMed:12665591}.	0.515256	0.517073	0.433199		1.05698	A0A3F2YNW7;Q8NFD5;Q8NFD5-2;Q8NFD5-3	27	AT-rich interactive domain-containing protein 1B;AT-rich interactive domain-containing protein 1B;Isoform 2 of AT-rich interactive domain-containing protein 1B;Isoform 3 of AT-rich interactive domain-containing protein 1B	ARID1B
15.8979	16.4243	15.6167	15.8177	16.0577	16.5627	17.0327	15.1704	17.2059	15.258	15.0574	14.5472	15.1338	14.4757	14.6522	15.3358	16.4099	15.1134	16.1813	TISSUE SPECIFICITY: Highly expressed in heart. {ECO:0000269|PubMed:16782067}.	2.34286	0.0435967	0.981951	+	3.26715	Q68CP9;Q68CP9-3	21	AT-rich interactive domain-containing protein 2;Isoform 2 of AT-rich interactive domain-containing protein 2	ARID2
13.3169	13.1088	13.2969	13.5957	12.4932	14.7893	13.559	11.2926	12.1872	13.8848	12.6274	13.5874	12.4625	14.0956	14.4102	14.4435	13.9585	14.8251	14.0062	NA	1.11563	0.219822	-0.759067		-1.88512	P29374;P29374-2;P29374-3	5	AT-rich interactive domain-containing protein 4A;Isoform II of AT-rich interactive domain-containing protein 4A;Isoform III of AT-rich interactive domain-containing protein 4A	ARID4A
16.0301	15.7168	13.7865	13.5754	13.0613	14.7713	13.101	12.8119	14.1403	15.4395	13.6543	14.5762	14.4369	13.0025	12.2053	13.2192	14.3791	9.83701	12.3015	TISSUE SPECIFICITY: Highly expressed in the testis and in breast, lung, colon, pancreatic and ovarian cancers. Expressed at low levels in the thymus, prostate and ovary. {ECO:0000269|PubMed:11481388, ECO:0000269|PubMed:12724404, ECO:0000269|PubMed:15247124}.	0.634821	0.435746	0.805364		1.23996	Q4LE39;Q4LE39-3	4	AT-rich interactive domain-containing protein 4B;Isoform 3 of AT-rich interactive domain-containing protein 4B	ARID4B
13.726	14.1312	10.2319	13.4364	11.341	11.863	14.0842	12.7254	14.3133	14.7071	11.3325	13.1305	12.9004	11.9092	12.8498	11.8767	12.7983	11.9874	11.0342	TISSUE SPECIFICITY: Widely expressed, including in liver (at protein level). {ECO:0000269|PubMed:21532585}.	0.322815	0.667141	0.419859		0.729652	Q14865;Q14865-2	4	AT-rich interactive domain-containing protein 5B;Isoform 2 of AT-rich interactive domain-containing protein 5B	ARID5B
16.7415	17.3092	16.4406	18.5675	17.5633	17.1347	16.4058	17.0022	17.7147	16.0215	16.1771	17.4001	15.8994	16.3912	16.4157	16.1105	16.451	16.5624	16.8739	TISSUE SPECIFICITY: Widely expressed. {ECO:0000269|PubMed:10521492}.	2.0717	0.0604583	0.778562	+	2.97595	Q9Y4X5	12	E3 ubiquitin-protein ligase ARIH1	ARIH1
15.3036	15.441	14.0389	12.9434	14.7992	14.986	15.1051	14.4422	15.2661	12.6433	11.9413	11.6956	12.4764	13.435	12.2595	14.5357	14.0112	13.4128	11.8307	TISSUE SPECIFICITY: Widely expressed with higher expression in granulocytes. {ECO:0000269|PubMed:16118314}.	3.5593	0.0163836	1.8787	+	4.56322	O95376	8	E3 ubiquitin-protein ligase ARIH2	ARIH2
17.1604	16.6223	17.9488	18.2642	17.6681	15.9114	19.3266	14.5697	20.3908	17.4738	16.6705	16.7002	16.8489	16.7785	17.7827	17.8102	16.8253	16.6554	16.62	TISSUE SPECIFICITY: Detected in heart, liver, lung and liver (at protein level). Detected in fetal heart, lung, liver and kidney. Detected in adult heart, placenta, lung, liver, skeletal muscle, kidney and pancreas. {ECO:0000269|PubMed:9624189}.	0.426641	0.581894	0.523713		0.912198	P40616;P40616-2	10	ADP-ribosylation factor-like protein 1;Isoform 2 of ADP-ribosylation factor-like protein 1	ARL1
15.4073	15.5808	16.2632	12.0382	15.8948	14.8936	17.9297	15.4819	19.3069	16.0873	15.3563	14.5844	14.6429	15.7402	17.0124	13.8278	14.9251	13.3137	12.8467	NA	0.710873	0.39244	1.03261		1.3504	A0A087WUW9;Q9NXU5	3	ADP-ribosylation factor-like protein 15	ARL15
16.7315	16.6041	15.7422	13.2967	17.0148	16.4389	18.1982	16.333	18.5519	18.1684	16.9201	16.6568	17.0303	17.0483	17.5235	15.7912	16.8813	14.8517	12.882	NA	0.0915127	0.897925	0.170342		0.244193	P36404	4	ADP-ribosylation factor-like protein 2	ARL2
16.0953	17.0351	14.6239	16.4096	16.4897	16.5616	17.8545	15.1814	17.9734	17.6539	13.0392	11.7075	11.7418	12.5059	12.2008	14.5753	14.9308	15.3007	12.0673	NA;TISSUE SPECIFICITY: Expressed in retina pigment epithelial cells (at protein level). Widely expressed. {ECO:0000269|PubMed:10488091, ECO:0000269|PubMed:23849777}.	2.93134	0.0241101	2.89706	+	3.89223	H3BU49;Q9Y2Y0;Q9Y2Y0-2	2	ADP-ribosylation factor-like protein 2-binding protein;ADP-ribosylation factor-like protein 2-binding protein;Isoform 2 of ADP-ribosylation factor-like protein 2-binding protein	ARL2BP
16.9841	16.8601	16.5567	20.257	17.2641	16.6271	15.038	16.7723	15.5036	17.5156	17.1976	17.2016	16.5434	16.9312	17.0412	16.8236	16.4584	16.0412	19.0139	TISSUE SPECIFICITY: Expressed in the retina. Strongly expressed in connecting cilium, the myoid region of the inner segments (IS) and in cone photoreceptors (at protein level). {ECO:0000269|PubMed:12417528}.	0.150189	0.830299	-0.20308		-0.381392	P36405	9	ADP-ribosylation factor-like protein 3	ARL3
14.2908	13.4613	11.9491	11.4662	14.413	13.8355	13.9494	13.4597	16.6957	15.0457	14.669	11.5392	12.1696	12.0153	12.8489	15.698	14.5304	11.4472	13.1367	NA	0.248779	0.73504	0.41454		0.588516	C9IZ13;Q9H0F7;Q9H0F7-2	3	ADP-ribosylation factor-like protein 6 (Fragment);ADP-ribosylation factor-like protein 6;Isoform 2 of ADP-ribosylation factor-like protein 6	ARL6
16.7661	17.6957	16.7879	11.1608	16.4597	17.4277	16.9802	16.4168	16.868	18.0388	13.4025	13.2062	13.8003	13.7357	17.4707	16.3777	17.0638	16.0943	20.8082	NA;TISSUE SPECIFICITY: Isoforms 3 and 7 were identified in brain, pancreas, prostate, and testis, but little or no message could be detected in other tissues. {ECO:0000269|PubMed:19582790}.	0.104427	0.881414	0.28493		0.275475	A0A0C4DG62;Q66PJ3-3	6	ADP-ribosylation factor-like protein 6-interacting protein 4;Isoform 3 of ADP-ribosylation factor-like protein 6-interacting protein 4	ARL6IP4
19.2053	18.7899	17.4508	18.6357	18.2745	18.3645	20.0581	18.953	19.784	16.3186	17.2428	17.2675	16.5843	16.3748	17.1503	18.5532	17.7228	18.0321	18.7099	NA	2.84034	0.026128	1.43944	+	3.79569	O75915	15	PRA1 family protein 3	ARL6IP5
19.8477	19.0487	18.6347	19.8283	19.9131	18.9315	20.6162	19.3555	21.2923	18.7851	19.4474	19.753	18.8885	19.6372	18.8337	17.788	18.708	18.2255	19.0244	TISSUE SPECIFICITY: Ubiquitously expressed. {ECO:0000269|PubMed:15331635}.	1.56343	0.12015	0.809585	+	2.41427	Q96BM9	13	ADP-ribosylation factor-like protein 8A	ARL8A
18.4226	18.1352	18.1272	18.7197	19.3477	18.851	19.6926	18.7593	20.7135	17.795	17.9694	17.5682	17.6767	17.6197	17.53	17.9465	17.0625	17.6937	18.1643	TISSUE SPECIFICITY: Ubiquitously expressed. {ECO:0000269|PubMed:15331635}.	3.52723	0.0163544	1.27172	+	4.52863	Q9NVJ2	10	ADP-ribosylation factor-like protein 8B	ARL8B
19.9748	16.7148	18.7058	13.4722	19.7404	18.4642	21.5954	18.8196	21.6245	15.2839	16.4891	16.8806	16.8866	13.6772	16.5486	11.3284	13.4903	18.3565	12.8736	NA	2.38375	0.0414946	3.60869	+	3.31077	H3BS74;J3KQ26;Q96C12;Q96C12-2;Q96C12-3;Q96C12-4	1	Armadillo repeat-containing protein 5 (Fragment);Armadillo repeat-containing protein 5;Armadillo repeat-containing protein 5;Isoform 2 of Armadillo repeat-containing protein 5;Isoform 3 of Armadillo repeat-containing protein 5;Isoform 4 of Armadillo repeat-containing protein 5	ARMC5
13.1379	14.0462	12.5617	11.5365	14.1114	13.6789	13.1431	10.5798	13.8908	14.8366	13.4411	14.5854	14.3516	14.2757	13.3211	12.9683	13.3492	12.55	13.219	NA	0.873544	0.310676	-0.724657		-1.57449	B4E1N1;Q6NXE6;Q6NXE6-2	6	Armadillo repeat-containing protein 6;Armadillo repeat-containing protein 6;Isoform 2 of Armadillo repeat-containing protein 6	ARMC6
14.6389	15.2383	14.4266	13.8623	15.1002	15.3401	15.3743	14.8365	16.3475	15.9019	15.0511	15.6041	15.1116	14.598	15.8601	14.4728	14.4163	14.2713	14.306	NA	0.0704277	0.917705	0.0589695		0.191633	Q8IUR7;Q8IUR7-2	14	Armadillo repeat-containing protein 8;Isoform 2 of Armadillo repeat-containing protein 8	ARMC8
13.4912	13.6762	10.6662	12.1081	14.9306	13.5624	14.1779	13.4244	12.7049	12.346	12.7455	12.556	12.4756	9.97172	12.0526	14.6026	11.4409	11.787	11.7	NA;TISSUE SPECIFICITY: Strongly expressed in most melanomas and melanocytes. Weakly expressed in the testis. {ECO:0000269|PubMed:11691810}.	1.09302	0.226941	1.02575		1.85703	A0A2Q3DP09;H7BZY2;H7C3U7;Q7Z3E5;Q7Z3E5-2	2	LisH domain-containing protein ARMC9;LisH domain-containing protein ARMC9 (Fragment);LisH domain-containing protein ARMC9 (Fragment);LisH domain-containing protein ARMC9;Isoform 2 of LisH domain-containing protein ARMC9	ARMC9
12.6534	11.9739	13.4184	13.6403	15.1721	14.2359	15.9013	14.308	13.7983	13.0869	12.0345	14.1261	11.2945	14.9599	13.0501	11.6932	11.1187	13.9183	12.8893	TISSUE SPECIFICITY: Expressed at high levels ovary, heart, testis, prostate, brain, spleen and colon. Expressed at very low levels in liver and thymus. Not expressed in peripheral blood leukocytes. Not or reduced expressed in lung, prostate, colon, pancreas and ovarian carcinomas. {ECO:0000269|PubMed:11162520}.	1.12651	0.216352	1.08305		1.89858	Q9P291	5	Armadillo repeat-containing X-linked protein 1	ARMCX1
12.4514	12.4735	12.8109	13.6397	15.7858	11.699	12.2969	18.1715	13.1269	15.8218	14.4237	15.834	15.7584	15.859	15.9147	10.8612	10.9017	11.5975	12.8079	TISSUE SPECIFICITY: Expressed at high levels ovary, heart, testis, prostate, brain, spleen and colon. Expressed at very low levels in liver and thymus. Not expressed in peripheral blood leukocytes. Not expressed in pancreas and ovarian carcinomas. {ECO:0000269|PubMed:11162520}.	NaN	1	0		NaN	Q7L311	3	Armadillo repeat-containing X-linked protein 2	ARMCX2
15.3584	17.3546	16.218	17.0311	16.5475	16.5627	16.7314	15.0918	17.2486	15.4943	16.5671	16.856	15.7547	16.4355	17.0905	16.6554	16.3548	15.8754	13.4102	NA	0.450969	0.562402	0.411062		0.952842	Q9UH62	11	Armadillo repeat-containing X-linked protein 3	ARMCX3
14.4545	14.6847	13.936	14.1763	13.4746	14.4144	13.1711	14.588	13.688	13.8704	15.0161	11.4984	15.9701	12.9677	14.2651	13.5006	13.3522	14.3532	14.7805	NA	0.0907314	0.899139	0.107858		0.242279	Q5T2E6	9	Armadillo-like helical domain-containing protein 3	ARMH3
15.2097	16.1888	14.8738	14.7793	15.4839	15.0024	16.6247	14.5496	15.3664	14.7018	14.7295	15.4435	14.3086	14.7971	14.4941	14.9512	13.4471	14.4174	15.2945	NA	1.55829	0.120831	0.683577	+	2.40843	Q9H993	14	Damage-control phosphatase ARMT1	ARMT1
14.3242	15.173	13.2432	15.49	16.0277	15.323	14.9979	13.5735	15.9086	12.9569	11.6096	12.7243	11.8202	12.3395	11.1335	13.1696	13.3158	12.1076	17.7747	NA	1.98948	0.067363	2.00053	+	2.88679	P27540;P27540-2;P27540-3;P27540-4	4	Aryl hydrocarbon receptor nuclear translocator;Isoform 2 of Aryl hydrocarbon receptor nuclear translocator;Isoform 3 of Aryl hydrocarbon receptor nuclear translocator;Isoform 4 of Aryl hydrocarbon receptor nuclear translocator	ARNT
11.9023	12.7572	11.6093	11.6259	12.717	12.9128	13.242	11.3455	12.9339	13.2119	13.3687	11.089	11.8086	11.4537	12.5324	11.1459	10.089	10.8167	12.3331	NA;TISSUE SPECIFICITY: Hair follicles (at protein level). Highly expressed in the adult brain, skeletal muscle and heart. {ECO:0000269|PubMed:24005054}.	NaN	1	0		NaN	A0A669KBF4;O00327;O00327-1;O00327-4;O00327-7;O00327-8;O00327-9	1	Aryl hydrocarbon receptor nuclear translocator-like protein 1;Aryl hydrocarbon receptor nuclear translocator-like protein 1;Isoform BMAL1A of Aryl hydrocarbon receptor nuclear translocator-like protein 1;Isoform BMAL1D of Aryl hydrocarbon receptor nuclear translocator-like protein 1;Isoform MOP3 of Aryl hydrocarbon receptor nuclear translocator-like protein 1;Isoform 8 of Aryl hydrocarbon recepto…	ARNTL
11.554	15.1201	18.7456	12.3288	16.5976	16.8473	14.6904	17.6163	14.5028	16.4971	18.3997	19.5851	18.1863	18.3588	17.7317	17.4163	17.3851	17.7288	11.9983	NA	1.18388	0.201544	-1.99507		-1.96895	Q92747	3	Actin-related protein 2/3 complex subunit 1A	ARPC1A
12.5409	12.0018	19.6517	12.2224	12.9159	13.4655	14.6632	20.0209	13.4565	19.911	20.7851	19.8915	20.2235	20.8914	18.918	17.3943	19.3621	19.0868	18.5198	NA	3.7347	0.0143273	-4.94958	+	-4.75323	O15143	4	Actin-related protein 2/3 complex subunit 1B	ARPC1B
19.487	19.4797	19.7447	22.5971	20.15	19.4379	20.4523	20.4691	20.2643	20.9055	20.8392	20.545	20.6705	20.9448	20.438	20.0232	19.3279	19.6894	21.785	NA	0.326349	0.664794	-0.28552		-0.736137	O15144	33	Actin-related protein 2/3 complex subunit 2	ARPC2
20.5139	21.0548	21.1428	21.6127	21.0322	21.0478	19.9537	21.7038	20.1273	21.0137	21.1508	20.6804	21.2479	20.9418	20.6364	21.124	20.9266	21.3969	22.3359	NA	0.446887	0.565159	-0.23552		-0.946073	O15145	18	Actin-related protein 2/3 complex subunit 3	ARPC3
19.7993	20.243	18.9623	22.0449	19.5843	19.0481	20.9797	20.9764	21.3434	18.8573	19.005	18.2462	19.0213	18.6455	17.9863	19.1542	18.961	19.2932	21.1236	NA	2.06194	0.0614256	1.30193	+	2.96539	F8WCF6;P59998	16	Actin-related protein 2/3 complex subunit 4	ARPC4-TTLL3
21.145	21.0575	20.5176	22.9472	21.8117	20.9564	21.8908	21.4525	21.7266	19.7663	20.1068	20.5694	20.459	19.9189	19.3818	20.7913	20.2958	20.7445	23.7615	NA	1.21191	0.194317	0.921079		2.00298	O15511	17	Actin-related protein 2/3 complex subunit 5	ARPC5
18.104	18.6903	17.7776	18.9293	18.7244	17.5725	19.9855	18.0896	19.9314	17.0725	18.3626	19.2813	18.0436	18.5522	17.7026	16.4932	17.0914	16.8278	18.9954	NA	1.13231	0.214709	0.802674		1.90574	Q9BPX5	8	Actin-related protein 2/3 complex subunit 5-like protein	ARPC5L
18.0233	18.2949	14.6699	19.2037	15.8922	16.3035	17.4668	18.0639	18.0478	19.0652	17.9037	16.9349	16.5383	18.2653	17.1176	16.8437	16.5875	15.2431	19.2213	NA	0.0244611	0.968181	-0.0425079		-0.0697161	H3BMD8;P56211;P56211-2	9	cAMP-regulated phosphoprotein 19;cAMP-regulated phosphoprotein 19;Isoform ARPP-16 of cAMP-regulated phosphoprotein 19	ARPP19
17.5293	16.9957	17.6794	12.1521	17.2288	17.1119	17.2779	17.4754	17.5294	12.7226	14.8231	13.598	11.1449	12.3413	11.447	16.9697	15.3834	17.5501	11.5348	NA;TISSUE SPECIFICITY: Inner and outer segments, and the inner plexiform regions of the retina.	2.25517	0.0488194	3.02405	+	3.17337	A0A087WWQ5;P36575;P36575-2	1	Arrestin-C;Arrestin-C;Isoform 2 of Arrestin-C	ARR3
18.2187	17.7422	18.657	18.9652	17.6473	18.2221	18.1521	18.4909	18.9029	17.195	18.1995	18.8251	17.7954	18.3921	18.0109	17.7145	16.9698	18.3314	18.5643	NA	0.714714	0.390296	0.333341		1.35587	P49407-2	24	Isoform 1B of Beta-arrestin-1	ARRB1
16.5821	16.5119	16.247	15.9601	16.9077	16.2473	16.9179	16.3822	18.1139	16.7008	16.3632	16.8187	16.3372	15.8541	16.2178	15.7062	15.5473	16.2704	15.9432	NA	1.18433	0.201425	0.476368		1.9695	P32121;P32121-3	16	Beta-arrestin-2;Isoform 2 of Beta-arrestin-2	ARRB2
15.0507	15.8325	15.1255	12.7909	15.2138	15.1676	15.8826	14.3993	15.9525	15.9046	15.3076	14.0729	14.5462	14.56	15.1739	15.5029	14.7038	14.8568	13.8493	NA	0.218931	0.762201	0.198375		0.528412	Q5T370;Q8N5I2	3	Arrestin domain-containing protein 1 (Fragment);Arrestin domain-containing protein 1	ARRDC1
13.6251	15.4157	18.7432	16.838	15.4472	17.5226	18.4619	17.1032	18.7017	16.071	17.422	16.0515	17.073	15.9169	16.559	17.0651	15.9866	16.8625	16.6423	NA	0.220096	0.760606	0.30819		0.530796	A0A0C4DFZ2;P15289	14	Arylsulfatase A	ARSA
16.5502	15.2206	17.0562	16.8098	17.3246	16.6558	16.9749	16.7259	18.0148	15.6656	16.1176	15.1165	15.9053	15.5129	15.361	16.1078	14.9349	15.5644	17.3712	NA	2.27965	0.047501	1.04902	+	3.19958	P15848	16	Arylsulfatase B	ARSB
14.5447	15.3074	14.3115	15.34	13.7307	11.4188	18.1772	12.7762	17.0672	13.7641	16.7692	12.2823	12.16	16.5131	16.6022	11.4728	14.4989	11.3598	15.4185	TISSUE SPECIFICITY: Expressed in the pancreas, kidney, liver, lung, placenta, brain and heart.	0.292697	0.694856	0.657445		0.673494	P51689;P51689-3	7	Arylsulfatase D;Isoform 3 of Arylsulfatase D	ARSD
13.2776	17.2505	16.177	18.2045	11.9914	17.9298	15.3754	14.7273	17.5171	17.0267	16.1172	12.0814	15.2009	12.5984	16.1836	15.409	17.8152	15.0942	16.75	NA;TISSUE SPECIFICITY: Expressed in the pancreas, liver and kidney.	0.174596	0.806015	0.400182		0.435096	F5GYY5;P51690	16	Arylsulfatase L	ARSL
12.586	12.2093	11.0603	13.1888	11.7546	12.9353	12.0552	11.2497	13.9265	12.8576	12.0342	13.0577	12.5035	11.6047	11.9643	11.8335	14.8559	14.1371	13.4516	NA;TISSUE SPECIFICITY: Ubiquitous. Highly expressed in liver and adipose. {ECO:0000269|PubMed:20663892}.	NaN	1	0		NaN	A0A0A0MRI7;H7C0E7;H7C484;Q9H2C2	1	Protein ARV1;Protein ARV1 (Fragment);Protein ARV1 (Fragment);Protein ARV1	ARV1
12.8245	12.5519	12.6563	13.787	12.3689	13.443	14.1711	13.1442	13.8602	14.7919	14.0801	14.4967	14.1304	14.2112	14.797	11.792	13.7503	11.9633	16.308	NA;TISSUE SPECIFICITY: Found in all the examined tissues including heart, brain, liver and kidney. Found at low level in lung.	0.96725	0.270741	-0.831296		-1.69749	C9JJX6;E9PDC3;O00192;O00192-2	7	Armadillo repeat protein deleted in velo-cardio-facial syndrome;Armadillo repeat protein deleted in velo-cardio-facial syndrome;Armadillo repeat protein deleted in velo-cardio-facial syndrome;Isoform Short of Armadillo repeat protein deleted in velo-cardio-facial syndrome	ARVCF
20.3767	19.6383	21.0008	20.364	20.2768	20.5225	20.9877	19.0987	21.1077	18.9549	18.841	18.8407	18.8905	18.3111	19.1605	19.5505	19.6026	19.9106	17.8656	NA;TISSUE SPECIFICITY: Broadly expressed with higher expression in heart. {ECO:0000269|PubMed:10610716}.	3.7198	0.0142759	1.382	+	4.73704	A0A1B0GTM3;A0A1B0GUA4;A0A1B0GUH5;A0A1B0GW68;Q13510;Q13510-2	25	Acid ceramidase;Acid ceramidase;Acid ceramidase;Acid ceramidase;Acid ceramidase;Isoform 2 of Acid ceramidase	ASAH1
14.4163	14.3392	13.2363	14.8318	14.7265	14.5163	16.4869	14.828	16.585	14.3059	14.4976	13.8406	13.895	14.6517	12.7482	13.3263	13.9742	13.4139	14.1367	NA	1.74434	0.0933469	1.00615	+	2.61748	A0A0A0MRE5;Q9ULH1;Q9ULH1-2	12	Arf-GAP with SH3 domain, ANK repeat and PH domain-containing protein 1;Arf-GAP with SH3 domain, ANK repeat and PH domain-containing protein 1;Isoform 1 of Arf-GAP with SH3 domain, ANK repeat and PH domain-containing protein 1	ASAP1
14.9155	15.2318	13.9934	14.668	14.1765	14.3891	15.9098	15.0042	13.0404	15.1192	15.7039	15.5855	15.1232	15.5192	15.4256	14.2968	13.7237	14.3441	14.4729	TISSUE SPECIFICITY: Detected in heart, brain, placenta, kidney, monocytes and pancreas. {ECO:0000269|PubMed:10022920}.	0.47209	0.546495	-0.339352		-0.987558	O43150	15	Arf-GAP with SH3 domain, ANK repeat and PH domain-containing protein 2	ASAP2
11.2778	13.4801	10.5628	13.119	12.0246	11.2606	13.2521	13.0221	11.6147	13.322	12.4487	12.4006	11.1973	12.7967	12.9369	12.2721	9.13624	9.86518	13.5317	NA;TISSUE SPECIFICITY: Highly expressed in primary hepatocarcinoma. Detected in lung, liver and blood leukocytes. {ECO:0000269|PubMed:14654939}.	NaN	1	0		NaN	H0YE36;Q8TDY4;Q8TDY4-2;Q8TDY4-3	1	Arf-GAP with SH3 domain, ANK repeat and PH domain-containing protein 3 (Fragment);Arf-GAP with SH3 domain, ANK repeat and PH domain-containing protein 3;Isoform 2 of Arf-GAP with SH3 domain, ANK repeat and PH domain-containing protein 3;Isoform 3 of Arf-GAP with SH3 domain, ANK repeat and PH domain-containing protein 3	ASAP3
14.3898	16.5239	13.4445	15.246	12.1771	13.2633	13.9622	13.4379	13.0583	13.5073	12.8102	12.0367	13.1885	11.8625	21.6579	15.9827	13.2386	10.2778	14.1134	TISSUE SPECIFICITY: Predominantly expressed in testis, kidney, and liver. {ECO:0000269|PubMed:20302626}.	0.0241809	0.968557	0.0772109		0.0689383	Q96DX5;Q96DX5-2;Q96DX5-3	3	Ankyrin repeat and SOCS box protein 9;Isoform 2 of Ankyrin repeat and SOCS box protein 9;Isoform 3 of Ankyrin repeat and SOCS box protein 9	ASB9
16.0484	16.6575	15.0872	15.7884	15.984	16.3097	16.1979	15.7137	15.8138	15.2362	13.7006	15.729	15.4737	15.7027	15.671	15.4048	16.0037	15.2033	15.2871	NA;TISSUE SPECIFICITY: Ubiquitous. {ECO:0000269|PubMed:12077347}.	1.58281	0.117549	0.614414	+	2.43626	H0YCB3;Q8N9N2;Q8N9N2-2	10	Activating signal cointegrator 1 complex subunit 1 (Fragment);Activating signal cointegrator 1 complex subunit 1;Isoform 2 of Activating signal cointegrator 1 complex subunit 1	ASCC1
17.0504	16.3063	15.3253	15.0826	15.851	16.3608	16.3176	16.3499	16.895	16.7008	15.9809	15.2038	15.24	14.7779	14.7683	15.8961	15.7289	15.6747	14.1548	TISSUE SPECIFICITY: Ubiquitous. {ECO:0000269|PubMed:12077347}.	1.52206	0.127809	0.758383	+	2.36712	Q9H1I8	11	Activating signal cointegrator 1 complex subunit 2	ASCC2
15.6792	16.3126	15.1672	16.6944	15.9191	15.648	16.1011	15.518	16.3531	16.3906	15.4548	15.8212	15.6765	15.743	15.0779	15.9667	15.9996	15.4346	16.1023	TISSUE SPECIFICITY: Ubiquitous. {ECO:0000269|PubMed:12077347}.	0.385648	0.613424	0.165817		0.841989	Q8N3C0	49	Activating signal cointegrator 1 complex subunit 3	ASCC3
11.8535	15.8997	16.1836	12.8016	15.1938	17.4449	16.7643	15.6479	13.3577	16.3263	14.0397	13.6218	15.3392	15.6246	13.0421	16.6265	17.1018	15.7425	12.9906	TISSUE SPECIFICITY: Highly expressed in testis and at lower levels in colon, small intestine and thymus. {ECO:0000269|PubMed:12842904}.	NaN	1	0		NaN	Q9NVP2	4	Histone chaperone ASF1B	ASF1B
16.2478	16.7314	15.8264	17.7409	16.7745	16.9834	17.7131	16.308	18.3041	16.8988	16.0556	15.5263	15.3909	16.0309	16.2264	15.5942	16.2972	15.3231	16.8652	NA;TISSUE SPECIFICITY: Ubiquitously expressed. Predominantly expressed in adult heart and testis and fetal lung and liver, with barely detectable expression in adult lung, liver, kidney, prostate, and peripheral leukocytes. {ECO:0000269|PubMed:10393421}.	2.03757	0.0636772	0.937964	+	2.939	F5H8F7;Q9UBL3;Q9UBL3-3	15	Set1/Ash2 histone methyltransferase complex subunit ASH2;Set1/Ash2 histone methyltransferase complex subunit ASH2;Isoform 3 of Set1/Ash2 histone methyltransferase complex subunit ASH2	ASH2L
18.1717	19.2491	19.2471	21.3198	16.7789	18.2446	17.817	17.7273	16.2827	18.2516	19.9839	18.665	18.5549	18.4669	19.1001	19.6711	17.8468	19.7323	21.2455	NA	0.775195	0.359064	-0.836448		-1.44081	P04424	26	Argininosuccinate lyase	ASL
16.1434	15.7368	16.5496	17.3652	16.6935	16.9239	17.0946	16.3472	16.3242	15.1695	16.3204	16.4851	15.6534	16.739	16.6968	16.1293	15.1288	16.4407	16.3875	TISSUE SPECIFICITY: Widely expressed. In adult, highly expressed in pancreas, placenta, fibroblast, thymus, prostate, testis, ovary and colon. Expressed at lower levels in spleen, small intestine and leukocytes. In fetus, expressed at high levels in the lung and kidney and at lower level in brain and liver.	1.05637	0.237614	0.460315		1.81113	O95671	21	Probable bifunctional dTTP/UTP pyrophosphatase/methyltransferase protein	ASMTL
18.4622	16.468	14.8543	15.8741	12.7662	16.9388	16.7611	14.7302	17.1325	16.5222	16.5094	14.6287	15.5779	16.5042	17.3924	16.0441	16.2151	16.2674	16.2573	NA	0.129153	0.854336	-0.19326		-0.333606	P08243;P08243-2	10	Asparagine synthetase [glutamine-hydrolyzing];Isoform 2 of Asparagine synthetase [glutamine-hydrolyzing]	ASNS
11.8201	10.4764	15.5546	12.5297	12.785	12.5518	13.6258	13.6114	12.2183	12.2031	11.9494	15.8445	6.29467	13.1861	15.4199	14.1855	12.4075	14.0838	13.4184	TISSUE SPECIFICITY: Brain white matter, skeletal muscle, kidney, adrenal glands, lung and liver.	0.0365865	0.955094	-0.102258		-0.10295	P45381	9	Aspartoacylase	ASPA
17.706	18.0394	17.3114	18.467	18.0394	17.6858	18.4671	17.474	19.3937	18.1673	17.2384	17.4981	17.7013	17.778	17.8843	16.6171	17.2809	16.8369	17.2278	TISSUE SPECIFICITY: Isoform 1 is detected in all tissues tested. Isoform 8 is mainly expressed in pancreas, heart, brain, kidney and liver. Isoform 8 is expressed in kidney (at protein level). {ECO:0000269|PubMed:11007777}.	1.63233	0.109362	0.641856	+	2.4922	Q12797	34	Aspartyl/asparaginyl beta-hydroxylase	ASPH
12.6551	12.5569	16.2834	13.3172	12.1886	12.2204	18.9361	19.089	12.9664	16.0199	14.4765	18.6625	17.4063	18.1168	17.5546	12.2799	15.5167	15.7201	12.1033	NA	0.551948	0.4892	-1.31753		-1.11449	Q8IZT6	2	Abnormal spindle-like microcephaly-associated protein	ASPM
20.6129	15.5007	18.7527	16.3545	16.9465	15.8922	16.9787	18.9142	18.3702	17.3412	18.0292	18.6268	18.5459	19.6003	19.2242	14.2277	15.6063	14.5781	15.4764	TISSUE SPECIFICITY: Higher levels in osteoarthritic articular cartilage, aorta, uterus. Moderate expression in small intestine, heart, liver, bladder, ovary, stomach, and in the adrenal, thyroid, and mammary glands. Low expression in trachea, bone marrow, and lung. Colocalizes with TGFB1 in chondrocytes within osteoarthritic (OA) lesions of articular cartilage. {ECO:0000269|PubMed:17827158}.	0.228982	0.752817	0.465792		0.54888	Q9BXN1	22	Asporin	ASPN
15.7401	16.7607	15.0945	15.9228	14.619	15.7543	15.8578	15.8098	15.1709	15.2753	15.4962	16.4753	15.4808	16.0313	15.1793	14.637	15.716	14.7869	15.061	TISSUE SPECIFICITY: Ubiquitous. Highly expressed in testis, heart, skeletal muscle and pancreas. {ECO:0000269|PubMed:11244503, ECO:0000269|PubMed:11358836}.	0.378718	0.62004	0.222744		0.829893	Q9BZE9;Q9BZE9-2	11	Tether containing UBX domain for GLUT4;Isoform 2 of Tether containing UBX domain for GLUT4	ASPSCR1
11.2992	10.7086	15.8696	13.2843	11.6757	15.3121	12.81	15.4985	13.1034	17.0402	16.4757	12.7393	12.0747	14.4122	13.0409	15.2428	11.7105	14.7685	12.4276	TISSUE SPECIFICITY: Expressed in brain, kidney, testis and tissues of the gastrointestinal tract. Present in sperm (at protein level). Over-expressed in uterine, mammary, prostatic and ovarian carcinoma. {ECO:0000269|PubMed:11984834, ECO:0000269|PubMed:14654938}.	NaN	1	0		NaN	Q7L266	3	Isoaspartyl peptidase/L-asparaginase	ASRGL1
19.5306	20.4964	19.457	22.0818	19.5488	19.5938	19.188	19.9144	20.0659	18.8248	20.8027	20.0963	20.5609	19.3315	20.1324	20.9127	19.545	20.7916	19.6989	TISSUE SPECIFICITY: Expressed in adult liver. {ECO:0000269|PubMed:1708740}.	0.0854232	0.904077	-0.0833809		-0.229209	P00966	43	Argininosuccinate synthase	ASS1
16.1852	13.0929	17.655	17.875	14.0694	17.9548	19.7652	11.3607	19.1548	13.4524	17.2252	11.926	16.708	12.6239	16.8761	16.9579	17.3801	16.3761	16.3436	NA	0.287203	0.699926	0.758944		0.663073	D6RG30;Q2TB18;Q2TB18-2	2	Asteroid homolog 1 (Drosophila), isoform CRA_c;Protein asteroid homolog 1;Isoform 2 of Protein asteroid homolog 1	ASTE1
10.866	12.3172	11.4098	13.1701	12.6518	12.367	12.7173	12.3958	14.474	14.9607	15.4457	13.4673	12.0974	15.3265	13.2893	12.5013	12.67	12.2014	15.0368	NA	1.36204	0.155335	-1.2142	+	-2.18184	E7EWD6;Q76L83	4	Putative Polycomb group protein ASXL2	ASXL2
15.5994	15.8634	15.7533	17.1988	15.0134	16.5975	16.5399	15.889	17.4974	16.849	17.2257	16.0163	16.3581	16.626	16.378	15.9765	16.9298	16.2709	18.4351	NA	0.743793	0.373013	-0.489639		-1.39699	Q8NBU5	18	ATPase family AAA domain-containing protein 1	ATAD1
11.5496	14.8253	12.1507	14.8358	10.8096	14.4417	16.7387	12.9312	17.3777	15.5628	11.0396	11.6928	12.0176	13.9047	15.1207	13.7986	12.9333	11.6599	13.7255	TISSUE SPECIFICITY: Highly expressed in estrogen receptor positive breast tumors and in osteosarcoma tumors. {ECO:0000269|PubMed:15721472, ECO:0000269|PubMed:17076897, ECO:0000269|PubMed:17660802}.	0.436046	0.574845	0.816702		0.927996	Q6PL18	10	ATPase family AAA domain-containing protein 2	ATAD2
13.8031	14.4526	13.6058	13.0338	14.2306	13.7885	13.6344	12.9787	16.8844	12.5094	12.144	13.596	11.7161	13.8536	12.7772	13.067	12.9058	13.0037	11.2159	NA	2.08477	0.0597572	1.36689	+	2.99009	Q9ULI0-2	6	Isoform 2 of ATPase family AAA domain-containing protein 2B	ATAD2B
18.4567	18.617	17.8563	19.6631	18.5575	18.8688	20.3878	17.483	21.235	18.4639	18.1357	17.6341	18.0139	18.3738	18.248	18.052	18.6879	18.2124	20.0059	TISSUE SPECIFICITY: Overexpressed in lung adenocarcinomas (at protein level). {ECO:0000269|PubMed:20332122}.	0.781331	0.356347	0.631151		1.4493	Q9NVI7-2	36	Isoform 2 of ATPase family AAA domain-containing protein 3A	ATAD3A
13.8721	15.3799	14.5914	16.5952	16.4289	16.0272	18.2286	13.0069	18.7824	15.0758	16.1663	11.8504	15.1765	16.7411	12.8643	14.3358	15.6595	15.4469	15.4385	TISSUE SPECIFICITY: Tends to be down-regulated in differentiated cells and re-expressed in pluripotent stem cells or cancer cells (at protein level). {ECO:0000269|PubMed:16909202, ECO:0000269|PubMed:22664726}.	0.666669	0.416816	1.00365		1.28671	Q5T9A4	9	ATPase family AAA domain-containing protein 3B	ATAD3B
5.65972	10.4728	9.35709	12.7134	10.0363	12.1986	5.27481	10.0713	14.745	12.1417	12.3078	13.2739	8.19563	12.0859	13.1239	7.95577	8.38599	11.3379	11.2781	NA	NaN	1	0		NaN	Q5SQI0;Q5SQI0-2;Q5SQI0-3	3	Alpha-tubulin N-acetyltransferase 1;Isoform 2 of Alpha-tubulin N-acetyltransferase 1;Isoform 3 of Alpha-tubulin N-acetyltransferase 1	ATAT1
16.2703	13.7838	14.3848	14.7684	15.0053	14.3206	16.2317	14.9121	16.0797	15.6076	15.6704	15.7379	14.852	15.5519	15.5786	14.3097	14.0466	13.615	14.4117	NA	0.146987	0.834488	0.145946		0.37421	H0Y5C2;O95260;O95260-2	9	Arginyl-tRNA--protein transferase 1 (Fragment);Arginyl-tRNA--protein transferase 1;Isoform ATE1-2 of Arginyl-tRNA--protein transferase 1	ATE1
12.0211	13.9741	13.7026	14.6284	12.5425	13.4118	13.2974	12.8697	15.6242	14.0948	11.4552	13.0464	13.3879	13.7778	10.4511	13.72	14.4069	13.4052	14.4101	NA;TISSUE SPECIFICITY: Ubiquitously expressed, with more abundant expression in the brain.	0.269831	0.716729	0.347993		0.629734	B8ZZU6;P15336;P15336-4;P15336-5	4	Cyclic AMP-dependent transcription factor ATF-2;Cyclic AMP-dependent transcription factor ATF-2;Isoform 4 of Cyclic AMP-dependent transcription factor ATF-2;Isoform 5 of Cyclic AMP-dependent transcription factor ATF-2	ATF2
11.209	12.022	18.7848	20.3003	19.4663	20.2038	20.7768	18.7241	18.984	12.4462	17.1425	14.1491	16.1169	11.0441	12.7771	19.5333	18.5581	18.8578	19.3026	NA;TISSUE SPECIFICITY: Ubiquitous. {ECO:0000269|PubMed:11256944}.	0.596944	0.459947	1.83734		1.18333	H0Y7D7;Q99941;Q99941-2	2	Cyclic AMP-dependent transcription factor ATF-6 beta;Cyclic AMP-dependent transcription factor ATF-6 beta;Isoform 1 of Cyclic AMP-dependent transcription factor ATF-6 beta	ATF6B
14.6324	13.891	14.0513	12.1262	11.7295	13.5075	12.7498	15.4704	16.5254	16.7329	11.8837	14.3256	15.1945	11.2444	14.2741	14.0687	14.5676	13.6533	12.3382	TISSUE SPECIFICITY: [Isoform 4]: Strongly expressed in skeletal muscle. Also expressed at lower levels in heart and lung. {ECO:0000269|PubMed:8288576}.;TISSUE SPECIFICITY: Expressed in various tissues including heart, brain, placenta, lung and skeletal muscle. Highest levels in skeletal muscle. Lowest in lung and placenta. {ECO:0000269|PubMed:8288576}.	NaN	1	0		NaN	P17544;P17544-2;P17544-3;P17544-4;P17544-6	6	Cyclic AMP-dependent transcription factor ATF-7;Isoform 1 of Cyclic AMP-dependent transcription factor ATF-7;Isoform 2 of Cyclic AMP-dependent transcription factor ATF-7;Isoform 4 of Cyclic AMP-dependent transcription factor ATF-7;Isoform 6 of Cyclic AMP-dependent transcription factor ATF-7	ATF7
12.727	13.5819	12.3614	11.6754	13.036	12.93	13.1082	10.6165	13.3811	14.9145	12.9197	12.9451	13.4064	12.1059	12.8366	12.2216	12.6879	12.0906	10.45	highly up-regulated in the corresponding cancerous tissues (at protein level). {ECO:0000269|PubMed:19106100}.;TISSUE SPECIFICITY: Detected at low levels in breast, lung and stomach	NaN	1	0		NaN	Q6VMQ6;Q6VMQ6-2;Q6VMQ6-4;Q6VMQ6-5	2	Activating transcription factor 7-interacting protein 1;Isoform 2 of Activating transcription factor 7-interacting protein 1;Isoform 3 of Activating transcription factor 7-interacting protein 1;Isoform 4 of Activating transcription factor 7-interacting protein 1	ATF7IP
13.9806	14.6144	12.6133	13.7414	13.4144	13.9975	16.3768	14.2988	16.3078	12.697	12.7927	12.9901	12.7804	10.9637	14.2726	13.2954	13.1147	12.7753	12.0666	NA	2.36207	0.0422129	1.5968	+	3.28765	F8VQD9;Q9BSB4	4	Autophagy-related protein 101 (Fragment);Autophagy-related protein 101	ATG101
14.2148	13.7989	14.1132	14.8522	12.6923	12.7443	13.0021	14.9307	14.0613	12.8915	12.3758	13.2657	13.5957	13.0018	12.123	14.5848	14.2938	14.885	14.9398	NA	NaN	1	0		NaN	H0YEM7;O75143;O75143-2;O75143-3;O75143-4;O75143-5	1	Autophagy-related protein 13 (Fragment);Autophagy-related protein 13;Isoform 2 of Autophagy-related protein 13;Isoform 3 of Autophagy-related protein 13;Isoform 4 of Autophagy-related protein 13;Isoform 5 of Autophagy-related protein 13	ATG13
14.6927	14.756	13.0967	14.223	14.608	15.2567	15.2099	15.7612	16.1641	13.285	12.6915	12.9403	11.4013	12.3613	12.9001	15.2218	14.8809	15.0336	12.4719	NA	2.0877	0.0597679	1.54435	+	2.99325	Q6ZNE5	2	Beclin 1-associated autophagy-related key regulator	ATG14
16.6311	16.9014	16.6728	19.4469	16.7984	16.1021	16.6927	16.6451	15.7057	17.1877	17.2588	17.248	16.8306	16.8871	17.1063	16.5789	16.1835	16.3862	18.6167	NA	0.187286	0.792884	-0.184373		-0.462338	E7EVC7;Q676U5;Q676U5-2	15	Autophagy-related protein 16-1;Autophagy-related protein 16-1;Isoform 2 of Autophagy-related protein 16-1	ATG16L1
12.2206	13.4552	14.5443	13.6878	13.3113	14.3421	14.0942	12.6739	15.978	12.5936	12.2137	12.5634	11.247	13.1417	16.476	14.5771	12.0413	11.641	14.9549	NA	0.488514	0.534611	0.666952		1.01421	Q2TAZ0;Q2TAZ0-3	8	Autophagy-related protein 2 homolog A;Isoform 2 of Autophagy-related protein 2 homolog A	ATG2A
16.8699	13.6246	13.1018	12.8215	12.0063	15.163	15.084	13.5718	14.0159	12.7815	12.9542	11.518	13.0531	14.905	13.5954	13.1113	13.1101	13.2864	13.5233	NA	0.865063	0.314987	0.844907		1.56316	Q96BY7	10	Autophagy-related protein 2 homolog B	ATG2B
15.3741	14.9782	14.5623	14.2813	13.8181	14.2685	12.6782	15.0176	13.4411	16.0345	15.5437	15.4509	14.5879	15.4159	15.5207	14.7826	14.0709	14.4854	14.5418	TISSUE SPECIFICITY: Widely expressed, with a highest expression in heart, skeletal muscle, kidney, liver and placenta. {ECO:0000269|PubMed:11825910}.	1.44156	0.139186	-0.774606	+	-2.27453	Q9NT62	9	Ubiquitin-like-conjugating enzyme ATG3	ATG3
12.6297	14.1523	14.6709	15.7908	12.1202	14.6724	14.1396	12.3549	13.6875	13.7941	14.8832	15.4917	15.0473	14.7925	13.0022	14.4376	12.3377	12.9871	14.9811	NA	0.310941	0.679227	-0.373408		-0.707704	C9JIK8;Q9Y4P1;Q9Y4P1-2;Q9Y4P1-6	4	Cysteine protease (Fragment);Cysteine protease ATG4B;Isoform 2 of Cysteine protease ATG4B;Isoform 6 of Cysteine protease ATG4B	ATG4B
14.5665	15.221	15.4277	15.3022	11.5823	15.4456	14.764	15.1873	16.1412	16.406	18.2976	17.3115	16.045	16.7624	15.3858	15.5458	13.8579	15.1137	14.4352	TISSUE SPECIFICITY: Ubiquitous. The mRNA is present at similar levels in viable and apoptotic cells, whereas the protein is dramatically highly expressed in apoptotic cells.	1.01509	0.251945	-1.06745		-1.75886	Q9H1Y0	7	Autophagy protein 5	ATG5
16.6094	16.8112	16.7316	16.5817	16.7541	15.9455	17.448	16.8056	17.4602	16.3982	16.8928	16.5164	16.6067	16.106	16.7698	16.2763	15.5547	15.9865	15.8132	TISSUE SPECIFICITY: Widely expressed, especially in kidney, liver, lymph nodes and bone marrow. {ECO:0000269|PubMed:11890701}.	1.61265	0.112447	0.502099	+	2.47002	O95352	17	Ubiquitin-like modifier-activating enzyme ATG7	ATG7
12.9973	14.4661	11.8137	14.128	14.2808	13.2494	14.5525	13.6968	14.8903	14.3214	12.3965	12.7574	13.0803	14.1394	13.9201	13.1902	13.3205	12.1836	14.0416	NA	0.570754	0.476634	0.451009		1.14348	Q7Z3C6;Q7Z3C6-2	14	Autophagy-related protein 9A;Isoform 2 of Autophagy-related protein 9A	ATG9A
20.2418	21.0679	19.9302	20.8435	19.3864	20.1646	20.2408	19.8353	19.8494	20.3492	20.1001	19.8224	19.4856	19.704	20.008	20.1739	20.1417	19.7892	20.5974	TISSUE SPECIFICITY: Present in the heart, brain, placenta, lung, liver, skeletal muscle, kidney, pancreas. {ECO:0000269|PubMed:9378707}.	0.358031	0.63752	0.156184		0.793364	P31939	42	Bifunctional purine biosynthesis protein ATIC	ATIC
14.789	14.7123	14.7222	12.3199	16.2684	14.7738	14.6414	16.1269	14.7703	15.4071	15.5681	16.7282	15.8825	16.56	16.2193	13.6063	13.3286	14.4556	12.8221	TISSUE SPECIFICITY: Expressed predominantly in the adult and fetal central nervous system. Measurable expression in all tissues examined, although expression in adult brain is at least 50-fold higher than in other tissues. Detected predominantly in pyramidal neurons in the cerebral cortex and the hippocampus of the brain. Expressed in upper and lower motor neurons (at protein level). {ECO:0000269…	0.182104	0.797273	-0.266218		-0.451268	Q8WXF7;Q8WXF7-2	13	Atlastin-1;Isoform 2 of Atlastin-1	ATL1
15.3755	15.5059	14.1711	15.9985	14.796	15.704	16.5039	14.9009	15.7333	15.3116	15.0872	16.863	15.5897	15.8457	15.9891	14.8721	14.7313	14.5133	16.4323	TISSUE SPECIFICITY: Expressed in peripheral tissues (at protein level). {ECO:0000269|PubMed:18270207}.	0.130493	0.853103	-0.113608		-0.336693	Q8NHH9	21	Atlastin-2	ATL2
18.9403	18.1601	17.9764	18.3683	19.8328	18.1398	18.8365	19.064	19.7376	18.3162	18.5511	18.8168	18.7011	18.7669	18.7836	17.98	17.3815	18.4245	18.7081	TISSUE SPECIFICITY: Expressed in the central nervous system and in dorsal root ganglia neurons. Expressed in peripheral tissues (at protein level). {ECO:0000269|PubMed:18270207, ECO:0000269|PubMed:24459106}.	0.670167	0.414148	0.340993		1.2918	Q6DD88	26	Atlastin-3	ATL3
14.2324	14.9334	14.4729	15.171	16.0294	14.9408	16.7506	15.4615	17.0929	14.8705	14.8599	14.7159	14.9594	14.0388	14.788	14.9469	15.2861	14.7829	14.9104	TISSUE SPECIFICITY: Found in pancreas, kidney, skeletal muscle, liver, lung, placenta, brain, heart, spleen, thymus, testis, ovary, small intestine, colon and leukocytes.	1.16508	0.205474	0.638022		1.94599	Q13315	63	Serine-protein kinase ATM	ATM
14.2578	15.7379	12.2063	14.4847	14.0603	13.2155	12.7217	14.0749	14.8319	12.2909	11.9723	12.239	14.2197	13.2012	12.0479	14.2925	12.8845	14.1506	12.8802	TISSUE SPECIFICITY: Widely expressed in various tissues including heart, lung, kidney, ovary, testis, prostate, placenta, skeletal Low levels in the liver, thymus and leukocytes. In the adult brain, broadly expressed in amygdala, caudate nucleus, corpus callosum, hippocampus, hypothalamus, substantia nigra, subthalamic nucleus, and thalamus. High levels in fetal tissues, especially brain. {ECO:00…	1.2383	0.186393	0.93666		2.03484	P54259	2	Atrophin-1	ATN1
18.5935	18.8727	17.3513	20.4201	17.9951	17.7445	17.7254	17.4	17.283	16.4383	16.1717	17.4894	17.1569	14.7373	16.3656	17.5952	17.1301	17.2498	18.3	NA;TISSUE SPECIFICITY: Ubiquitous.	1.92408	0.0730737	1.29051	+	2.8155	E5RGN3;E5RIM7;O00244	5	Copper transport protein ATOX1	ATOX1
15.2398	15.7323	15.7145	17.4907	17.9618	16.9234	16.7268	15.0701	17.2906	14.7987	12.6304	13.6235	14.1854	12.2462	13.5633	15.5592	14.2403	15.3368	17.2716	NA;TISSUE SPECIFICITY: Widely expressed (PubMed:26567335). Expressed in myoblasts (PubMed:29799007). {ECO:0000269|PubMed:26567335, ECO:0000269|PubMed:29799007}.	2.61204	0.032497	2.11557	+	3.55354	E9PEJ6;H0Y547;P98196	9	Phospholipid-transporting ATPase;Phospholipid-transporting ATPase (Fragment);Probable phospholipid-transporting ATPase IH	ATP11A
15.5724	16.1651	15.4206	15.8683	17.1688	16.2906	17.7363	15.3699	18.4274	15.2337	14.5508	13.1603	14.6834	14.4694	14.9721	15.8007	15.3968	15.9604	14.9192	NA	2.58599	0.03352	1.53189	+	3.52589	Q9Y2G3	11	Probable phospholipid-transporting ATPase IF	ATP11B
11.947	14.3702	14.8944	16.3094	13.5896	13.52	13.1924	13.4883	12.8538	14.5981	15.5768	12.419	13.4135	13.8132	13.065	14.0644	13.6379	13.9314	14.3065	NA;TISSUE SPECIFICITY: Widely expressed. {ECO:0000269|PubMed:15533723, ECO:0000269|PubMed:26567335}.	0.0643009	0.924927	-0.0864493		-0.17599	A0A067XG54;Q8NB49;Q8NB49-2;Q8NB49-3;Q8NB49-4	5	Phospholipid-transporting ATPase;Phospholipid-transporting ATPase IG;Isoform 2 of Phospholipid-transporting ATPase IG;Isoform 3 of Phospholipid-transporting ATPase IG;Isoform 4 of Phospholipid-transporting ATPase IG	ATP11C
17.6244	18.5208	16.8671	19.2821	18.9548	18.8959	19.5191	17.5777	20.7547	17.7025	18.3325	16.6946	17.4664	17.8062	17.5702	18.3475	17.3106	18.4167	18.261	NA	1.29606	0.170791	0.875466		2.10391	Q9HD20	44	Manganese-transporting ATPase 13A1	ATP13A1
13.9426	14.4561	13.7934	11.7183	14.906	14.8487	15.8642	12.038	18.0664	15.2527	13.1533	12.8087	11.8855	11.1854	15.2442	13.4216	14.4021	13.5828	13.4285	NA	0.672992	0.413363	0.967259		1.2959	A0A2R8YDN7	8	Cation-transporting ATPase	ATP13A3
21.0036	21.151	21.6222	22.1072	20.1588	21.8617	21.1855	19.9662	21.5256	20.5113	22.3653	20.6789	20.8396	20.7088	20.9543	21.7533	20.8587	21.9456	22.9501	NA	0.205307	0.776123	-0.180812		-0.500278	P05023;P05023-4	69	Sodium/potassium-transporting ATPase subunit alpha-1;Isoform 4 of Sodium/potassium-transporting ATPase subunit alpha-1	ATP1A1
13.1633	14.002	13.6814	15.6031	16.259	14.8021	14.4043	13.4281	13.0687	15.6655	16.4045	16.0618	14.3577	14.6288	15.0899	13.2935	14.0155	14.7743	13.0753	NA	0.43161	0.578448	-0.468689		-0.920559	B1AKY9;P50993	8	Sodium/potassium-transporting ATPase subunit alpha;Sodium/potassium-transporting ATPase subunit alpha-2	ATP1A2
15.0796	12.0772	15.046	12.4896	12.8833	12.4064	13.4604	15.976	14.1911	12.1835	11.6391	17.663	11.9094	12.3923	15.3297	10.2043	14.4447	15.3829	10.7682	NA	NaN	1	0		NaN	P13637-2	6	Isoform 2 of Sodium/potassium-transporting ATPase subunit alpha-3	ATP1A3
18.8876	19.4727	19.1563	18.8929	17.1707	20.2948	19.8324	17.6206	19.9712	18.497	20.183	18.5592	18.5465	18.5942	18.7229	19.613	18.4837	19.6905	19.8382	TISSUE SPECIFICITY: Found in most tissues.	0.0351131	0.956589	-0.0395861		-0.0989553	P05026;P05026-2	28	Sodium/potassium-transporting ATPase subunit beta-1;Isoform 2 of Sodium/potassium-transporting ATPase subunit beta-1	ATP1B1
11.0366	12.021	13.3463	13.8593	12.6679	12.1438	13.0733	12.3372	13.9989	11.7243	12.9834	14.5881	12.8236	13.1394	12.8554	11.638	11.6469	13.827	12.5174	NA	NaN	1	0		NaN	I3L3J8;P14415	1	Sodium/potassium-transporting ATPase subunit beta (Fragment);Sodium/potassium-transporting ATPase subunit beta-2	ATP1B2
16.3121	17.2322	17.6576	21.0353	18.1968	17.1985	18.3237	16.6997	19.1635	16.1957	17.4369	15.9019	16.1808	16.7051	16.3123	16.6939	16.8502	17.4388	19.2796	NA	1.15079	0.208396	1.08041		1.92848	P54709	15	Sodium/potassium-transporting ATPase subunit beta-3	ATP1B3
12.5044	14.0358	14.8149	13.5785	11.8106	14.9603	14.4041	13.879	13.5254	13.3496	14.0259	13.8293	11.6809	13.7256	12.6324	13.6365	12.585	13.5031	12.3097	NA	0.769704	0.361208	0.595851		1.43319	Q9Y6H3	3	Mitochondrial inner membrane protease ATP23 homolog	ATP23
19.365	20.0204	18.8739	20.4903	19.3584	20.1365	19.7962	19.1658	20.9941	19.5237	19.834	19.1117	19.3161	19.5961	19.2302	19.6881	19.5074	19.6761	20.6505	TISSUE SPECIFICITY: Isoform 1 is widely expressed in smooth muscle and nonmuscle tissues such as in adult skin epidermis, with highest expression in liver, pancreas and lung, and intermediate expression in brain, kidney and placenta. Also expressed at lower levels in heart and skeletal muscle. Isoforms 2 and 3 are highly expressed in the heart and slow twitch skeletal muscle. Expression of isofor…	0.319939	0.670802	0.186683		0.724358	P16615	58	Sarcoplasmic/endoplasmic reticulum calcium ATPase 2	ATP2A2
17.0842	17.6617	18.4567	18.4191	17.9332	18.7475	18.7362	17.2324	20.3045	16.417	19.4175	17.5881	18.1058	17.3217	17.9121	18.8174	16.7828	18.9569	17.6394	TISSUE SPECIFICITY: Found in most tissues. Most abundant in thymus, trachea, salivary gland, spleen, bone marrow, lymph node, peripheral leukocytes, pancreas and colon. Also detected in fetal tissues. Expressed in cell lineages of hematopoietic, epithelial, or embryonic origin and also expressed in several cancer cell lines. {ECO:0000269|PubMed:11956212, ECO:0000269|PubMed:15028735}.	0.40738	0.597499	0.390271		0.879488	Q93084-2	34	Isoform SERCA3A of Sarcoplasmic/endoplasmic reticulum calcium ATPase 3	ATP2A3
18.4094	17.5906	18.3116	17.9147	19.2379	18.1367	19.0566	18.8175	19.6087	18.2724	17.8334	19.9399	18.3771	18.6898	18.8811	18.02	17.8615	18.1763	18.065	TISSUE SPECIFICITY: Isoform B: Ubiquitously expressed. Isoform C: Found in brain cortex, skeletal muscle and heart muscle. Isoform D: Has only been found in fetal skeletal muscle. Isoform K: Found in small intestine and liver. Abundantly expressed in the endometrial epithelial cells and glandular epithelial cells in early-proliferative phase and early-secretory phases (PubMed:21400627). {ECO:0000…	0.212662	0.7692	0.153201		0.515523	P20020;P20020-1;P20020-4;P20020-6	31	Plasma membrane calcium-transporting ATPase 1;Isoform D of Plasma membrane calcium-transporting ATPase 1;Isoform C of Plasma membrane calcium-transporting ATPase 1;Isoform K of Plasma membrane calcium-transporting ATPase 1	ATP2B1
14.4857	14.4444	15.5993	20.7019	15.2877	14.4011	13.6799	12.8265	16.2314	15.0884	12.1894	16.3023	15.8295	17.162	12.608	15.8406	15.2168	16.3097	12.9316	TISSUE SPECIFICITY: Highly expressed in the cerebellum (PubMed:8187550). Expressed in adrenal glands (PubMed:27035656). {ECO:0000269|PubMed:27035656, ECO:0000269|PubMed:8187550}.	0.14814	0.83318	0.347504		0.3768	Q16720;Q16720-4	1	Plasma membrane calcium-transporting ATPase 3;Isoform ZB of Plasma membrane calcium-transporting ATPase 3	ATP2B3
19.321	16.8785	17.5076	17.4414	19.4936	17.3052	19.7321	19.6623	20.058	17.0305	16.8766	20.2538	18.2089	18.8927	19.4269	16.658	16.5627	17.1153	17.6325	TISSUE SPECIFICITY: Isoform XB is the most abundant isoform and is expressed ubiquitously. Isoforms containing segment Z have only been detected in heart, while isoforms containing segment a have been found in heart, stomach and brain cortex. {ECO:0000269|PubMed:1531651}.	0.641392	0.433424	0.734157		1.24967	P23634;P23634-8	31	Plasma membrane calcium-transporting ATPase 4;Isoform ZD of Plasma membrane calcium-transporting ATPase 4	ATP2B4
15.6081	15.7451	15.7254	16.566	15.3245	16.4645	16.105	14.1879	17.8508	17.3138	16.2918	12.0704	12.7634	16.5118	17.1824	15.6797	15.8253	15.6947	16.5922	TISSUE SPECIFICITY: Found in most tissues except colon, thymus, spleen and leukocytes (PubMed:15831496). Expressed in keratinocytes (at protein level) (PubMed:15831496, PubMed:14632183). {ECO:0000269|PubMed:14632183, ECO:0000269|PubMed:15831496}.	0.223127	0.757965	0.360497		0.536985	P98194-3;P98194-4	13	Isoform 3 of Calcium-transporting ATPase type 2C member 1;Isoform 4 of Calcium-transporting ATPase type 2C member 1	ATP2C1
12.2288	15.1367	15.0209	14.2877	11.9876	16.6194	17.4284	11.3918	17.5524	15.1205	15.9916	14.014	12.9142	14.6379	13.4267	15.5921	12.2699	14.402	14.3132	TISSUE SPECIFICITY: Highly expressed in the gastrointestinal and respiratory tracts, prostate, thyroid, salivary, and mammary glands (PubMed:15831496). Expressed in colon epithelial cells (at protein level). Expressed in brain and testis (at protein level) (PubMed:15677451). {ECO:0000269|PubMed:15677451, ECO:0000269|PubMed:15831496}.	0.172498	0.807617	0.35999		0.43055	O75185;O75185-2;O75185-3	6	Calcium-transporting ATPase type 2C member 2;Isoform 2 of Calcium-transporting ATPase type 2C member 2;Isoform 3 of Calcium-transporting ATPase type 2C member 2	ATP2C2
16.7577	15.5296	18.5857	14.5822	16.0176	16.9268	12.8439	17.6533	17.6396	12.0962	19.058	19.3134	19.6124	11.388	19.2231	15.1216	15.8622	12.9528	13.9355	NA	0.136035	0.8471	0.425507		0.3494	K7EK77	1	ATP synthase subunit alpha, mitochondrial (Fragment)	ATP5F1A
23.3729	22.2336	24.2546	25.0363	23.0413	23.2561	23.8511	23.1798	24.1177	23.534	24.5463	24.0577	23.6266	24.143	23.9089	23.3785	24.1878	24.1297	25.2252	NA	0.840909	0.326113	-0.480044		-1.53069	P06576	57	ATP synthase subunit beta, mitochondrial	ATP5F1B
21.3604	20.5855	21.6587	20.347	20.3852	20.2263	20.2251	20.4375	21.5355	20.9067	21.5423	21.3172	20.8747	21.3892	21.06	20.4784	21.4272	21.1591	22.699	TISSUE SPECIFICITY: Isoform Heart is expressed specifically in the heart and skeletal muscle, which require rapid energy supply. Isoform Liver is expressed in the brain, liver and kidney. Isoform Heart and Isoform Liver are expressed in the skin, intestine, stomach and aorta.	1.18581	0.201279	-0.534121		-1.9713	P36542	24	ATP synthase subunit gamma, mitochondrial	ATP5F1C
20.0858	19.3003	20.6387	19.9859	18.6558	19.0509	18.8839	20.6216	18.5197	14.9842	16.5316	17.519	17.1052	16.4584	17.724	18.48	19.5205	19.2009	19.1612	NA	2.44571	0.0391415	1.85846	+	3.37678	P30049	5	ATP synthase subunit delta, mitochondrial	ATP5F1D
21.1283	20.7399	22.2395	18.2651	18.4414	19.8375	17.5904	20.9761	16.747	20.823	22.0201	21.597	20.8392	21.6985	20.9987	20.7211	21.9547	20.3995	20.8558	NA;TISSUE SPECIFICITY: Ubiquitous.	1.7746	0.0896076	-1.63907	+	-2.65106	P56381;Q5VTU8	2	ATP synthase subunit epsilon, mitochondrial;ATP synthase subunit epsilon-like protein, mitochondrial	ATP5F1E
17.4485	17.893	14.9938	17.6983	14.4391	16.7509	16.8838	15.5228	15.1672	13.9531	16.1108	14.1197	14.2701	14.8892	15.4245	15.2209	15.23	15.5278	17.0594	NA	1.36518	0.155031	1.13026	+	2.18553	Q9UII2	15	ATPase inhibitor, mitochondrial	ATP5IF1
17.0817	15.8179	17.0567	19.2484	17.0928	18.8305	17.1503	13.8866	17.766	15.8317	17.1959	17.3477	14.4777	15.7382	16.5514	15.9944	16.7071	16.9044	16.635	NA	0.697976	0.398665	0.765089		1.33195	Q96IX5	6	ATP synthase membrane subunit DAPIT, mitochondrial	ATP5MD
19.1215	18.3482	19.3069	23.8607	19.5689	20.0234	20.4034	17.0914	21.4835	19.5348	19.6931	19.611	18.6903	19.5906	19.5945	18.6988	19.0635	19.4384	22.9331	NA	0.119645	0.864343	0.227186		0.311514	P56385	6	ATP synthase subunit e, mitochondrial	ATP5ME
16.9061	16.7545	15.4237	16.362	17.3174	17.6104	17.6832	14.6537	18.0099	14.2702	14.3916	15.1594	14.3576	15.2048	13.3807	15.1144	15.7273	15.2242	16.0083	NA	3.28623	0.01825	1.86294	+	4.27	G3V325	11	ATP5MF-PTCD1 readthrough	ATP5MF-PTCD1
19.2105	18.4239	19.4221	23.2058	19.1925	20.298	19.7912	15.7963	20.5395	19.6041	19.5825	20.1495	18.2024	19.7631	18.8585	18.5526	18.5775	18.6791	15.3303	NA	0.518744	0.515064	0.812262		1.0625	O75964	6	ATP synthase subunit g, mitochondrial	ATP5MG
18.9855	18.453	15.5151	19.1662	15.7106	17.2486	12.6392	17.3225	13.0676	18.4531	18.7604	18.7196	16.968	18.9997	17.6252	15.9564	16.0841	17.9322	18.925	NA	0.911724	0.293579	-1.38588		-1.62508	P56378	5	ATP synthase subunit ATP5MPL, mitochondrial	ATP5MPL
19.1129	17.9859	19.2958	21.3576	19.0278	19.9024	19.1655	17.6809	19.5071	18.7904	19.6531	19.2255	18.2348	19.3085	19.1033	18.6602	19.1321	19.5121	20.6804	NA	0.00328694	0.99551	-0.00384852		-0.00958993	P24539	20	ATP synthase F(0) complex subunit B1, mitochondrial	ATP5PB
21.5191	20.7044	21.0766	22.5038	21.5431	21.9407	22.4194	19.6015	22.5266	21.3756	21.9641	21.4359	20.7204	21.5919	21.0794	20.9551	21.4024	21.628	21.5967	NA	0.201993	0.779456	0.162271		0.493363	O75947	14	ATP synthase subunit d, mitochondrial	ATP5PD
17.7272	16.74	18.3933	19.4795	19.8797	18.8696	19.6978	14.444	20.0212	18.6962	18.9412	18.6724	18.6406	18.8392	19.0133	17.5049	17.4146	18.1507	18.3665	NA	0.0366655	0.955043	-0.0625931		-0.103164	P18859;P18859-2	13	ATP synthase-coupling factor 6, mitochondrial;Isoform 2 of ATP synthase-coupling factor 6, mitochondrial	ATP5PF
20.8871	20.2743	20.6585	20.445	20.2579	20.9833	21.34	19.7265	21.5197	20.624	21.3832	20.4648	20.2991	20.5593	20.0553	20.3863	21.0033	20.6961	21.1476	NA	0.0233516	0.969871	0.0150047		0.0666335	P48047	16	ATP synthase subunit O, mitochondrial	ATP5PO
16.601	17.9932	17.1122	18.1823	18.9903	16.7296	19.0364	15.6908	19.9416	12.8017	12.5476	13.7554	13.4401	14.4447	12.9679	16.0493	15.983	16.7834	19.0099	TISSUE SPECIFICITY: widely expressed, with highest levels in brain and lowest in liver and duodenum. {ECO:0000269|PubMed:27231034}.	2.70859	0.0290764	3.0303	+	3.65597	Q15904	6	V-type proton ATPase subunit S1	ATP6AP1
12.2349	14.5806	13.0071	13.2553	14.1127	13.0902	13.8062	10.8307	16.8643	15.4923	14.4803	14.1931	13.8653	13.3705	14.7446	13.6411	12.9462	13.1286	13.0893	NA;TISSUE SPECIFICITY: Expressed in brain, heart, placenta, liver, kidney and pancreas. Barely detectable in lung and skeletal muscles. In the kidney cortex it is restricted to the mesangium of glomeruli. In the coronary and kidney artery it is expressed in the subendothelium, associated to smooth muscles where it colocalizes with REN. Expressed in vascular structures and by syncytiotrophoblast c…	0.261423	0.724131	-0.363781		-0.613382	A0A1B0GUT7;A0A1B0GVB9;A0A1B0GVW0;A0A1C7CYW4;B7Z1I9;O75787;O75787-2	3	Renin receptor;Renin receptor;Renin receptor;Renin receptor;Renin receptor;Renin receptor;Isoform 2 of Renin receptor	ATP6AP2
15.4378	16.3757	16.1365	17.2263	16.3425	15.1595	15.8428	15.8698	16.523	16.4395	16.2498	16.3245	15.2944	15.9219	16.5135	16.0562	15.7381	15.7027	17.0886	NA	0.0436772	0.946422	-0.0313687		-0.122011	Q93050;Q93050-1;Q93050-3	20	V-type proton ATPase 116 kDa subunit a1;Isoform 2 of V-type proton ATPase 116 kDa subunit a1;Isoform 3 of V-type proton ATPase 116 kDa subunit a1	ATP6V0A1
16.5898	15.5795	14.492	14.5538	17.2161	15.0021	16.4645	14.4513	17.1228	13.1018	11.8591	12.5548	12.9149	15.2372	12.5862	14.2683	13.0435	13.7671	13.4799	NA	3.99403	0.0130588	2.43784	+	5.03718	Q8TBM3	7	V-type proton ATPase subunit a	ATP6V0A2
15.4706	15.874	17.0867	13.7254	17.5003	15.8889	16.1536	14.2588	17.3107	12.8306	12.6839	11.9586	11.4447	13.0964	12.2652	16.8257	16.1499	16.3531	14.6069	NA	1.7976	0.0865384	2.09729	+	2.67652	P27449	2	V-type proton ATPase 16 kDa proteolipid subunit	ATP6V0C
17.6786	17.7854	17.6631	19.7673	18.0722	16.8504	18.2309	17.1423	18.7009	17.118	17.6649	17.5621	17.5506	17.8169	16.5036	17.4894	16.5031	16.6807	18.7242	NA;TISSUE SPECIFICITY: Ubiquitous. {ECO:0000269|PubMed:12384298, ECO:0000269|PubMed:8250920}.	1.01392	0.252379	0.626567		1.75738	F5GYQ1;P61421;R4GN72	11	V-type proton ATPase subunit;V-type proton ATPase subunit d 1;V-type proton ATPase subunit d 1	ATP6V0D1
18.6985	19.2839	18.9487	19.0717	19.4425	18.5605	19.5071	18.9646	19.8443	18.1111	18.5534	18.2588	18.224	18.2643	17.9293	18.572	18.4172	18.4516	19.0623	TISSUE SPECIFICITY: High expression in the skin. {ECO:0000269|PubMed:28065471}.	3.59358	0.0160571	0.762465	+	4.60024	P38606;P38606-2	38	V-type proton ATPase catalytic subunit A;Isoform 2 of V-type proton ATPase catalytic subunit A	ATP6V1A
17.0404	17.4328	16.892	17.4841	17.6199	17.2211	18.0604	17.0618	18.2839	17.1838	17.239	17.051	17.4704	16.8332	17.0609	17.1407	16.4078	16.5049	16.6833	TISSUE SPECIFICITY: Ubiquitous. {ECO:0000269|PubMed:12384298}.	1.78014	0.0889777	0.497656		2.6572	P21283	24	V-type proton ATPase subunit C 1	ATP6V1C1
17.5011	17.5152	16.828	17.3827	16.6162	16.8596	16.9523	16.6873	17.4292	15.963	16.0962	16.8333	17.1402	16.0633	16.8828	16.9115	15.861	16.1599	17.8804	NA	1.24989	0.183829	0.506581		2.04877	Q9Y5K8	12	V-type proton ATPase subunit D	ATP6V1D
18.0481	18.2309	17.8869	17.8748	17.0694	17.5211	17.469	17.9987	17.3676	18.3967	18.456	18.4771	18.2994	18.2104	18.2084	18.0447	17.6615	17.7861	17.5581	localizes to early distal nephron, encompassing thick ascending limbs and distal convoluted tubules (at protein level) (PubMed:29993276). Ubiquitous (PubMed:12036578). High expression in the skin (PubMed:28065471). {ECO:0000269|PubMed:12036578, ECO:0000269|PubMed:28065471, ECO:0000269|PubMed:29993276}.;TISSUE SPECIFICITY: Kidney	1.54401	0.123114	-0.391368		-2.39217	P36543	13	V-type proton ATPase subunit E 1	ATP6V1E1
16.5949	17.0158	16.5141	17.3347	17.2385	17.1395	19.6999	17.0279	19.9272	16.9359	15.9096	15.6556	15.9841	15.6212	16.7918	15.4496	16.0489	15.7101	17.0428	NA	2.40408	0.041157	1.49532	+	3.33244	Q16864;Q16864-2	7	V-type proton ATPase subunit F;Isoform 2 of V-type proton ATPase subunit F	ATP6V1F
18.5433	18.9324	18.011	17.7032	18.689	17.8381	18.7313	18.5143	19.7842	18.938	18.0861	17.8564	18.0549	18.4501	18.1189	18.2974	17.0527	17.9012	18.335	localizes to early distal nephron, encompassing thick ascending limbs and distal convoluted tubules (at protein level) (PubMed:29993276). Ubiquitous (PubMed:12384298). {ECO:0000269|PubMed:12384298, ECO:0000269|PubMed:29993276}.;TISSUE SPECIFICITY: Kidney	0.910266	0.294575	0.41835		1.62316	O75348	7	V-type proton ATPase subunit G 1	ATP6V1G1
11.3319	11.3614	12.5489	13.2188	10.9926	10.0061	13.2213	13.3139	13.3097	11.6305	11.8808	14.0681	12.0636	11.8216	12.9147	11.6428	9.6256	9.57031	13.5267	TISSUE SPECIFICITY: Brain. {ECO:0000269|PubMed:12384298}.	0.173323	0.806812	0.270478		0.432338	O95670;O95670-2	3	V-type proton ATPase subunit G 2;Isoform 2 of V-type proton ATPase subunit G 2	ATP6V1G2
14.4658	14.4555	15.3939	14.9922	14.9488	13.7841	16.1004	15.1672	16.6621	14.3946	15.5717	15.4189	15.2514	15.0862	14.9057	14.9945	14.7066	15.3364	14.896	TISSUE SPECIFICITY: Widely expressed. {ECO:0000269|PubMed:9620685}.	0.0627663	0.926721	0.0515934		0.172045	Q9UI12;Q9UI12-2	12	V-type proton ATPase subunit H;Isoform 2 of V-type proton ATPase subunit H	ATP6V1H
14.4179	13.5081	13.9636	17.2414	13.0684	11.6288	12.2165	12.1533	12.3256	14.5143	13.5721	9.60718	14.0146	13.6015	14.5644	13.1434	13.5179	13.4937	15.6195	TISSUE SPECIFICITY: [Isoform 3]: Expressed in cerebellum and brain cortex. {ECO:0000269|PubMed:9693104}.;TISSUE SPECIFICITY: Widely expressed including in heart, brain, lung, muscle, kidney, pancreas, and to a lesser extent placenta (PubMed:8490646, PubMed:8490659). Expressed in fibroblasts, aortic smooth muscle cells, aortic endothelial cells and umbilical vein endothelial cells (at protein leve…	0.0858243	0.903504	-0.173326		-0.2302	Q04656;Q04656-2;Q04656-3;Q04656-5	8	Copper-transporting ATPase 1;Isoform 1 of Copper-transporting ATPase 1;Isoform 2 of Copper-transporting ATPase 1;Isoform 5 of Copper-transporting ATPase 1	ATP7A
14.9637	14.6924	15.119	17.7868	16.0003	14.7292	15.6342	13.8533	17.3498	12.8526	15.9459	14.036	14.9047	14.2636	15.1203	14.7844	14.5539	14.7319	17.0986	TISSUE SPECIFICITY: Found in most adult tissues except liver, testis and placenta. Most abundant in heart, brain and skeletal muscle. Also detected in fetal tissues. Isoform 1 is only detected in brain, skeletal muscle and heart and is the most abundant form in skeletal muscle. Highly expressed in platelets (PubMed:30674456). {ECO:0000269|PubMed:30674456}.	0.701765	0.397044	0.740644		1.33738	Q9Y2Q0-3	15	Isoform 3 of Phospholipid-transporting ATPase IA	ATP8A1
15.9068	16.8637	17.4005	17.6044	14.8785	16.7668	18.7863	15.6749	17.7794	16.8477	17.8212	15.966	16.0897	15.774	17.0928	16.6335	16.4644	16.7308	18.2012	TISSUE SPECIFICITY: Found in most tissues except brain and skeletal muscle. Most abundant in pancreas and small intestine.	0.071056	0.917164	0.0891147		0.193227	O43520	28	Phospholipid-transporting ATPase IC	ATP8B1
16.3071	16.1768	16.2393	16.8244	16.2773	16.1056	17.5416	16.2946	17.6224	17.2365	17.0556	16.9734	15.8667	17.1373	16.9221	16.2433	16.2598	16.1194	17.0026	NA	0.127688	0.85535	-0.0828639		-0.330222	O75110	16	Probable phospholipid-transporting ATPase IIA	ATP9A
14.429	14.6677	14.4096	17.1447	15.1325	14.5744	14.8875	13.9092	15.349	14.9353	16.0856	12.6031	15.0668	15.4917	15.545	14.3828	14.2439	14.3921	15.5903	NA	0.0944658	0.894307	0.111168		0.251405	O43861;O43861-2	8	Probable phospholipid-transporting ATPase IIB;Isoform 2 of Probable phospholipid-transporting ATPase IIB	ATP9B
16.4266	16.744	15.9256	16.4072	12.376	16.2184	17.0687	15.3444	17.5881	13.1045	15.5334	16.4549	12.8847	15.4362	15.3868	16.1124	16.8542	15.498	15.7171	NA;TISSUE SPECIFICITY: Weakly expressed in muscle. {ECO:0000269|PubMed:12965202}.	0.545494	0.493916	0.712771		1.10447	I3L448;Q5TC12	5	ATP synthase mitochondrial F1 complex assembly factor 1	ATPAF1
13.302	13.3251	15.5873	13.3983	10.8644	15.0269	11.2104	13.3129	17.3731	13.9173	14.5157	12.5755	14.1044	14.1883	15.7385	14.7281	14.8555	13.6941	16.979	TISSUE SPECIFICITY: Widely expressed. {ECO:0000269|PubMed:11410595}.	0.52882	0.507025	-0.818479		-1.07839	Q8N5M1	8	ATP synthase mitochondrial F1 complex assembly factor 2	ATPAF2
10.7968	12.2673	10.6188	11.6504	12.6538	12.8438	13.3002	11.8567	12.7067	10.5802	12.6262	12.2091	11.8754	10.4598	11.1454	12.5661	12.493	11.2548	9.76946	NA;TISSUE SPECIFICITY: Ubiquitous, with highest expression in testis. Isoform 2 is found in pancreas, placenta and liver but not in heart, testis and ovary. {ECO:0000269|PubMed:11470508, ECO:0000269|PubMed:8610130, ECO:0000269|PubMed:8843195}.	0.675747	0.412024	0.579227		1.2999	A0A590UJ01;Q13535;Q13535-2;Q13535-3	4	Serine/threonine-protein kinase ATR (Fragment);Serine/threonine-protein kinase ATR;Isoform 2 of Serine/threonine-protein kinase ATR;Isoform 3 of Serine/threonine-protein kinase ATR	ATR
15.0369	17.5592	14.8017	12.4421	15.7889	14.7532	12.5163	16.5798	14.0452	12.1656	12.4913	16.1486	15.3849	16.0652	11.9152	14.9837	15.2056	15.5081	12.5296	NA;TISSUE SPECIFICITY: Ubiquitous. {ECO:0000269|PubMed:11721054}.	NaN	1	0		NaN	A0A0U1RQJ8;Q8WXE1;Q8WXE1-2;Q8WXE1-3;Q8WXE1-5	2	ATR-interacting protein (Fragment);ATR-interacting protein;Isoform 2 of ATR-interacting protein;Isoform 3 of ATR-interacting protein;Isoform 4 of ATR-interacting protein	ATRIP
12.4308	13.3699	13.2181	12.9955	14.0608	13.4382	13.2423	12.9726	14.5619	10.6051	13.0702	14.1252	12.236	12.9226	13.1771	12.6411	13.3063	13.8239	11.3546	TISSUE SPECIFICITY: Isoform 2 is detected in plasma (at protein level). Expressed and secreted by activated T-lymphocytes. Expressed at low to moderate levels in peripheral blood leukocytes, spleen, lymph node, tonsil, bone marrow and fetal liver. At very low levels found in thymus. Isoform 2 is the major isoform in peripheral blood leukocytes. {ECO:0000269|PubMed:10811918, ECO:0000269|PubMed:172…	0.859187	0.317304	0.639364		1.55529	O75882;O75882-2	13	Attractin;Isoform 2 of Attractin	ATRN
15.5033	15.5962	14.5065	16.4295	15.6899	15.4191	16.3501	15.0027	15.7914	15.3629	14.8362	14.3772	14.4682	15.2374	15.6929	14.9799	15.0196	14.6454	16.4145	TISSUE SPECIFICITY: Ubiquitous.	0.996125	0.259347	0.484212		1.73465	P46100;P46100-4	33	Transcriptional regulator ATRX;Isoform 3 of Transcriptional regulator ATRX	ATRX
12.2937	12.208	12.5788	12.3744	12.7286	12.421	13.4113	16.0724	13.5397	13.3679	11.1912	11.9731	12.2841	12.0084	13.5756	12.2943	14.0497	11.2615	12.9076	TISSUE SPECIFICITY: Widely expressed throughout the body. {ECO:0000269|PubMed:12062018}.	NaN	1	0		NaN	P54253	1	Ataxin-1	ATXN1
16.374	15.8923	16.757	19.0416	16.5376	16.2397	15.5132	16.9829	16.1543	15.5791	15.2767	15.1337	15.7765	15.2197	15.7877	16.1072	17.002	15.819	17.3237	TISSUE SPECIFICITY: Expressed in the central nervous system. {ECO:0000269|PubMed:15201271}.	1.01408	0.252396	0.707748		1.75758	Q9UBB4	8	Ataxin-10	ATXN10
12.976	13.3553	12.7496	12.7715	12.9206	12.0873	12.9957	12.4849	13.2796	13.064	12.5953	13.2603	13.3772	12.3326	13.8089	11.6568	11.9368	11.3294	12.0452	TISSUE SPECIFICITY: Expressed in cerebellum and cerebral cortex. {ECO:0000269|PubMed:16121196}.	NaN	1	0		NaN	P0C7T5	2	Ataxin-1-like	ATXN1L
16.1437	17.1927	16.1058	17.7484	16.5667	16.9594	16.594	16.2302	17.0869	16.5691	15.6226	15.3512	15.6101	16.2092	15.845	15.7784	16.4584	15.3533	16.7814	NA	2.25843	0.0486654	0.778578	+	3.17686	A0A2R8Y7E6;A0A5F9ZI57	16	Ataxin-2	ATXN2
17.2034	18.4009	15.857	17.7575	16.4036	17.6848	17.7838	16.9817	18.0073	18.2155	16.2487	16.7825	16.4407	17.2955	16.9761	17.6101	17.6196	16.5808	18.1968	TISSUE SPECIFICITY: Expressed at high levels in thymus, lymph node, spleen, fetal kidney and adult testis. Constitutively associated with MPL and EPOR in hematopoietic cells. {ECO:0000269|PubMed:11784712}.	0.166892	0.813283	0.145577		0.418336	Q8WWM7	24	Ataxin-2-like protein	ATXN2L
16.4536	15.9753	15.7928	16.951	16.4882	15.9455	16.5196	16.2351	16.106	14.242	16.3625	15.8054	14.8872	15.0473	14.8673	15.3018	16.0182	15.1734	16.0692	NA;TISSUE SPECIFICITY: Ubiquitous.	2.63962	0.0317431	0.896687	+	3.58281	A0A087WXY4;A0A087X1A8;A0A2R8Y3X7;D3VVH9;F5H211;G3V3R7;P54252;P54252-1;P54252-4	9	Ataxin-3;Ataxin-3;Ataxin-3;Ataxin 3 variant m;Ataxin-3;Ataxin-3 (Fragment);Ataxin-3;Isoform 1 of Ataxin-3;Isoform 4 of Ataxin-3	ATXN3
14.1152	15.9122	15.7647	13.652	13.3167	15.932	18.0138	15.2207	18.685	17.3504	16.0735	15.8039	14.6427	15.1283	15.6431	15.0317	15.3906	16.038	12.1778	NA	0.160735	0.818744	0.295578		0.404816	Q96GX2	3	Ataxin-7-like protein 3B	ATXN7L3B
18.4253	17.5098	17.7231	23.2532	17.1078	17.0928	17.8824	15.9026	17.6348	17.6259	19.0466	17.7664	17.7306	18.049	17.5846	17.7171	16.7929	17.4449	22.8766	NA	0.0879406	0.90245	-0.204392		-0.235422	Q13825;Q13825-2	9	Methylglutaconyl-CoA hydratase, mitochondrial;Isoform 2 of Methylglutaconyl-CoA hydratase, mitochondrial	AUH
18.0977	18.6107	16.8542	18.7984	17.2699	17.5863	18.4082	16.7469	18.8523	17.3619	16.8148	16.4627	16.6655	16.5903	16.9961	17.0747	17.393	17.0342	20.4094	TISSUE SPECIFICITY: Detected in blood platelets and leukocytes (at protein level). Ubiquitous. Highly expressed in placenta, liver, kidney, skeletal muscle, heart and brain. {ECO:0000269|PubMed:12042322}.	0.726305	0.383216	0.633629		1.37232	Q9Y679	9	Ancient ubiquitous protein 1	AUP1
17.5158	11.3831	16.5552	17.8657	16.9823	18.3969	18.6978	15.6835	20.045	18.5001	18.5902	12.5012	17.4967	17.2825	12.7575	17.1881	18.353	17.6733	18.0308	TISSUE SPECIFICITY: Ubiquitously expressed and especially highly expressed in heart, skeletal muscle and testis.	0.0590805	0.929671	0.176583		0.162524	Q9NWT8	1	Aurora kinase A-interacting protein	AURKAIP1
15.2406	15.4966	12.8854	15.5236	12.475	15.38	16.4769	10.6004	15.9908	14.2455	12.1687	12.9603	13.9744	13.4624	13.1632	14.7819	15.142	13.3359	14.2784	NA;TISSUE SPECIFICITY: High level expression seen in the thymus. It is also expressed in the spleen, lung, testis, colon, placenta and fetal liver. Expressed during S and G2/M phase and expression is up-regulated in cancer cells during M phase. {ECO:0000269|PubMed:9809983, ECO:0000269|PubMed:9858806}.	0.486618	0.536051	0.700866		1.01114	J3QLN8;Q96GD4;Q96GD4-4;Q96GD4-5	8	Aurora kinase B (Fragment);Aurora kinase B;Isoform 4 of Aurora kinase B;Isoform 5 of Aurora kinase B	AURKB
14.255	15.4229	14.1702	14.8938	14.4922	15.713	17.2334	14.2741	13.9424	15.8814	14.9354	12.6108	14.4283	17.5212	15.4052	14.0918	14.1912	13.8362	11.4003	TISSUE SPECIFICITY: Highly expressed in testis, ovary, thymus, prostate, spleen, small intestine, colon, heart, skeletal muscle, liver, kidney and pancreas.	0.342912	0.65045	0.502812		0.766256	Q9NQS1	7	Cell death regulator Aven	AVEN
11.0457	13.0139	14.6224	13.0298	11.7373	13.2913	16.0118	11.0694	14.5392	17.5611	12.4172	12.9163	13.1639	12.1707	12.133	13.7044	15.0238	12.5059	12.5234	TISSUE SPECIFICITY: Most highly expressed in the small intestine and colonic lining. Weaker expression also detected in the thymus, prostate, testes and uterus (PubMed:12034507). Expressed in podocytes (at protein level) (PubMed:29058690). {ECO:0000269|PubMed:12034507, ECO:0000269|PubMed:29058690}.	NaN	1	0		NaN	O75366;O75366-2	4	Advillin;Isoform 2 of Advillin	AVIL
17.742	17.7796	17.2358	21.9561	13.981	17.0771	19.8547	16.3225	17.2316	16.9788	17.6359	16.4582	16.1095	17.1256	16.6842	16.9569	16.9838	16.7839	19.0833	NA	0.367046	0.629196	0.60669		0.80936	Q8NBF6	17	Late secretory pathway protein AVL9 homolog	AVL9
10.936	16.2901	14.853	15.43	15.7742	14.379	15.905	13.6013	12.3241	12.9641	16.86	16.5628	16.9498	12.6553	15.9186	15.9401	12.8706	13.2591	14.8038	TISSUE SPECIFICITY: Ubiquitously expressed.	0.252666	0.732326	-0.490332		-0.596196	O15169;O15169-2	5	Axin-1;Isoform 2 of Axin-1	AXIN1
13.9542	10.9874	10.9351	12.0183	14.9757	12.75	14.2581	15.991	13.8919	11.6624	11.4963	13.437	12.6438	12.0422	13.3137	11.0766	10.6142	10.3321	12.145	NA;TISSUE SPECIFICITY: Highly expressed in metastatic colon tumors. Expressed in primary colon tumors. Weakly expressed in normal colon tissue. {ECO:0000269|PubMed:7896447}.	NaN	1	0		NaN	M0R0W6;P30530;P30530-2	1	Tyrosine-protein kinase receptor UFO;Tyrosine-protein kinase receptor UFO;Isoform Short of Tyrosine-protein kinase receptor UFO	AXL
15.606	14.6464	16.5771	18.0574	15.7064	14.5796	15.492	15.4355	15.1046	16.7511	17.4766	17.0657	15.9029	15.4608	17.8328	14.603	14.8144	16.0603	16.8952	TISSUE SPECIFICITY: Blood plasma, seminal plasma, urine, saliva, sweat, epithelial cells of various human glands, liver.	0.605458	0.455109	-0.596862		-1.19616	P25311	13	Zinc-alpha-2-glycoprotein	AZGP1
19.499	20.4106	15.1237	19.7888	22.1315	18.7426	19.8784	13.8348	20.846	16.8374	12.8735	13.159	16.7636	16.9133	13.2107	17.6532	15.8438	18.1995	18.7813	NA	1.70696	0.0988051	2.89373	+	2.57586	P20160	4	Azurocidin	AZU1
19.2371	19.6965	21.4982	21.5048	19.1838	19.8439	21.5266	21.7459	22.8768	20.939	20.8333	21.2148	20.7237	20.9236	20.7027	20.5514	19.4562	20.5881	20.896	NA	0.0905584	0.899205	0.107515		0.241855	H0YLF3	6	Beta-2-microglobulin (Fragment)	B2M
11.9242	13.9802	16.296	12.4819	11.9739	14.005	12.7642	11.5079	15.8685	10.9154	14.7733	13.3058	11.5669	16.6466	14.1684	14.0281	9.9619	14.6178	12.3455	NA;TISSUE SPECIFICITY: Expressed in stomach, jejunum, colon, pancreas, small intestine, testis and gastrointestinal and pancreatic cancer cell lines. Hardly detected in lung, liver, adrenal gland and peripheral blood leukocytes. {ECO:0000269|PubMed:10406968}.	0.080568	0.908451	0.189473		0.217149	A0A0A0MS93;Q9Y2C3	8	Hexosyltransferase;Beta-1,3-galactosyltransferase 5	B3GALT5
11.9041	12.7798	15.7777	15.7235	16.6774	13.9293	17.6028	16.1676	18.8278	12.8182	12.5469	12.3711	13.9485	14.9555	13.101	15.6327	15.4662	14.1629	16.1428	NA;TISSUE SPECIFICITY: Ubiquitous (but weakly expressed in all tissues examined).	0.91238	0.293535	1.37321		1.62594	G3V150;O94766;O94766-2	5	Galactosylgalactosylxylosylprotein 3-beta-glucuronosyltransferase;Galactosylgalactosylxylosylprotein 3-beta-glucuronosyltransferase 3;Isoform 2 of Galactosylgalactosylxylosylprotein 3-beta-glucuronosyltransferase 3	B3GAT3
16.5445	15.983	15.5014	19.804	16.8326	15.5665	14.9493	16.14	15.4129	17.0519	15.0842	16.3687	15.9478	16.4963	15.0209	14.6223	14.2405	14.5004	16.4206	TISSUE SPECIFICITY: Widely expressed, with highest levels in testis and uterus. {ECO:0000269|PubMed:12943678, ECO:0000269|PubMed:16899492}.	0.673065	0.41352	0.72844		1.29601	Q6Y288	5	Beta-1,3-glucosyltransferase	B3GLCT
14.0159	14.9335	13.5996	15.0251	11.7414	14.2008	13.5409	11.3584	15.1107	14.3908	12.5034	12.9008	13.5056	13.9569	12.9149	14.2925	13.6161	14.4133	14.0208	TISSUE SPECIFICITY: Ubiquitous. {ECO:0000269|PubMed:11042166}.	0.0545855	0.934122	0.0736101		0.150823	Q9NY97;Q9NY97-2	7	N-acetyllactosaminide beta-1,3-N-acetylglucosaminyltransferase 2;Isoform 2 of N-acetyllactosaminide beta-1,3-N-acetylglucosaminyltransferase 2	B3GNT2
12.253	16.9063	14.0835	12.1611	13.2217	16.1305	12.6516	12.1686	15.5439	13.9361	11.6487	13.6343	12.2795	14.8072	12.4225	15.5258	13.716	13.4639	11.9503	TISSUE SPECIFICITY: Expressed in colon, jejunum, stomach, esophagus, placenta and trachea. {ECO:0000269|PubMed:11042166}.	NaN	1	0		NaN	Q9Y2A9	7	N-acetyllactosaminide beta-1,3-N-acetylglucosaminyltransferase 3	B3GNT3
11.7145	12.0864	15.5168	13.0416	11.9807	13.9942	12.593	13.1157	16.8876	11.8714	16.3387	13.6474	12.9104	11.7385	13.0405	15.0079	9.92139	14.6882	12.9483	TISSUE SPECIFICITY: Present in stomach and colon (at protein level). Restricted in the stomach, colon and small intestine, where core 3 structure is present. {ECO:0000269|PubMed:15755813}.	NaN	1	0		NaN	Q6ZMB0	9	Acetylgalactosaminyl-O-glycosyl-glycoprotein beta-1,3-N-acetylglucosaminyltransferase	B3GNT6
12.4663	13.2625	17.4257	13.3765	12.6404	13.9167	13.8553	15.7632	17.7795	12.6037	16.8939	13.2778	12.8864	12.3086	13.3414	15.2406	11.0569	15.8541	12.8487	NA	NaN	1	0		NaN	Q8NFL0	7	UDP-GlcNAc:betaGal beta-1,3-N-acetylglucosaminyltransferase 7	B3GNT7
11.9276	13.0713	13.2277	13.9176	11.0301	15.4951	13.8647	12.0376	12.9348	13.2424	11.0725	12.5187	13.0042	12.5619	13.2961	13.3405	12.4598	13.1364	13.7966	TISSUE SPECIFICITY: Highly expressed in small intestine, pancreas, spleen, bone marrow, lung, throat, and ileum, and weakly in fetal brain, cerebellum, heart, liver, tongue, breast, uteri, and testis. Not detected in colon. Differentially expressed in human tumor cell lines. {ECO:0000269|PubMed:15486459, ECO:0000269|PubMed:15620693}.	NaN	1	0		NaN	Q7Z7M8	1	UDP-GlcNAc:betaGal beta-1,3-N-acetylglucosaminyltransferase 8	B3GNT8
12.1994	12.2074	12.2604	12.3855	13.8547	12.9309	13.0271	14.9476	12.7293	11.982	14.434	11.7914	12.3655	14.628	14.279	16.797	13.8824	16.15	12.8765	TISSUE SPECIFICITY: Widely expressed. Highly expressed in colon and to a lesser extent in kidney, stomach, ileum and rectum. {ECO:0000269|PubMed:12678917}.	NaN	1	0		NaN	Q8NHY0;Q8NHY0-2;Q8NHY0-3	4	Beta-1,4 N-acetylgalactosaminyltransferase 2;Isoform 2 of Beta-1,4 N-acetylgalactosaminyltransferase 2;Isoform 3 of Beta-1,4 N-acetylgalactosaminyltransferase 2	B4GALNT2
15.7603	17.3626	17.0142	16.8303	12.4669	15.9151	15.2797	15.4949	15.4837	16.0853	17.6437	15.4321	15.7512	16.3469	15.268	17.4118	16.593	17.2557	16.7267	TISSUE SPECIFICITY: Ubiquitously expressed, but at very low levels in fetal and adult brain.	0.711483	0.392198	-0.717252		-1.35127	P15291;P15291-2	6	Beta-1,4-galactosyltransferase 1;Isoform Short of Beta-1,4-galactosyltransferase 1	B4GALT1
11.8217	17.193	13.2676	15.0655	13.315	13.486	12.8373	10.8482	13.1211	12.7367	12.7706	12.4569	11.8995	12.3277	13.56	14.1831	10.6668	13.8269	14.2791	TISSUE SPECIFICITY: Found in various tissues. Highest expression in placenta, prostate, testis, ovary, intestine and muscle, and in fetal brain. {ECO:0000269|PubMed:9405390}.	NaN	1	0		NaN	O60512	3	Beta-1,4-galactosyltransferase 3	B4GALT3
20.3814	20.5919	17.2887	21.1422	14.818	20.8548	23.6076	17.1474	18.6545	19.6718	19.1594	19.7871	17.5509	15.0398	18.0743	18.7457	17.5624	18.5897	18.6776	lower in brain, colon, lung, muscle, ovary, testis and uterus.;TISSUE SPECIFICITY: High expression in heart, placenta, kidney and pancreas	0.577666	0.473452	1.10151		1.15406	O60513	10	Beta-1,4-galactosyltransferase 4	B4GALT4
11.1796	11.4952	15.639	13.2174	15.783	16.5753	15.4697	16.648	13.7998	12.9291	13.7377	11.5863	11.0758	12.8578	14.0703	16.1426	10.6737	15.3085	11.4509	NA	NaN	1	0		NaN	A0A2R8Y646;A0A590UJK9;I3L126;I3L435	1	B9 domain-containing protein 1;B9 domain-containing protein 1;B9 domain-containing protein 1 (Fragment);B9 domain-containing protein 1	B9D1
17.126	17.6562	17.1454	16.009	17.4386	17.6461	17.6591	17.3235	17.5964	17.4376	17.3569	17.6576	17.3244	17.4525	17.5621	17.4024	16.8881	17.1631	17.0683	NA	0.0865308	0.903523	-0.042381		-0.231945	Q9NWV8	13	BRISC and BRCA1-A complex member 1	BABAM1
17.2984	17.5465	17.5801	17.7394	17.5766	17.9398	17.192	16.8587	17.2095	17.7331	17.5963	16.4154	16.4046	17.2616	18.2304	17.5445	16.9697	17.2741	16.7475	TISSUE SPECIFICITY: Expressed in all cell lines examined. Highly expressed in placenta. {ECO:0000269|PubMed:11676476}.	0.47266	0.546112	0.220186		0.988488	Q9NXR7;Q9NXR7-1;Q9NXR7-3;Q9NXR7-4	7	BRISC and BRCA1-A complex member 2;Isoform 1 of BRISC and BRCA1-A complex member 2;Isoform 3 of BRISC and BRCA1-A complex member 2;Isoform 4 of BRISC and BRCA1-A complex member 2	BABAM2
16.1986	15.4861	14.8354	16.7056	15.7455	15.3789	16.4754	15.1039	15.5829	13.0871	12.4348	13.2028	12.7668	12.815	13.8789	15.4085	14.3807	14.6452	16.2447	TISSUE SPECIFICITY: Expressed in a wide variety of tissues.	2.98397	0.0233831	1.83717	+	3.9481	Q92934	4	Bcl2-associated agonist of cell death	BAD
15.5197	15.9291	16.7921	15.4065	17.4644	16.4233	16.9728	16.1113	16.446	16.215	17.5389	16.657	16.3003	16.1258	17.0084	16.0871	15.3838	15.8096	14.918	NA;TISSUE SPECIFICITY: Isoform 4 is the most abundantly expressed isoform. It is ubiquitously expressed throughout most tissues, except the liver, colon, breast and uterine myometrium. Isoform 1 is expressed in the ovary and testis. Isoform 4 is expressed in several types of tumor cell lines, and at consistently high levels in leukemia and lymphoma cell lines. Isoform 1 is expressed in the prosta…	0.164037	0.815958	0.13621		0.412081	J3QTA2;Q99933;Q99933-3;Q99933-4	9	BAG family molecular chaperone regulator 1;BAG family molecular chaperone regulator 1;Isoform 3 of BAG family molecular chaperone regulator 1;Isoform 4 of BAG family molecular chaperone regulator 1	BAG1
19.2382	17.9752	17.1474	19.1141	19.5387	16.9008	18.0722	20.2624	17.6738	18.0413	17.3222	19.4858	18.5684	18.9874	19.1995	17.0842	17.7856	15.9161	19.4392	NA	0.192557	0.788349	0.252886		0.473523	O95816	16	BAG family molecular chaperone regulator 2	BAG2
16.5608	15.2813	14.7247	15.3698	17.2435	15.2846	16.8721	17.2561	15.7785	15.9216	15.0618	17.0377	16.4777	16.3627	16.9916	14.8945	15.0184	14.5293	17.0177	NA	0.0927477	0.896809	0.109948		0.247213	O95817	34	BAG family molecular chaperone regulator 3	BAG3
14.6245	15.0196	11.318	12.4984	12.8039	14.7053	15.2227	13.83	15.157	12.5277	12.3659	12.5185	12.1303	13.5777	13.0232	12.8694	13.7541	12.0791	11.6409	TISSUE SPECIFICITY: Ubiquitous.	1.68834	0.100831	1.26014	+	2.55505	O95429;O95429-2	3	BAG family molecular chaperone regulator 4;Isoform 2 of BAG family molecular chaperone regulator 4	BAG4
15.2644	15.7584	14.4589	17.0342	14.2418	15.5698	16.232	14.8023	16.6788	15.5242	15.3376	15.2281	15.258	15.2707	14.8526	14.987	14.8719	14.42	15.727	NA	0.64019	0.433767	0.412365		1.24789	Q9UL15;Q9UL15-2	13	BAG family molecular chaperone regulator 5;Isoform 2 of BAG family molecular chaperone regulator 5	BAG5
15.9329	16.6305	16.2958	17.4488	16.5275	16.4369	17.073	16.1735	16.9488	16.5382	15.9794	16.0139	16.3895	16.4092	16.3108	16.4798	16.1603	15.9545	17.7894	NA;TISSUE SPECIFICITY: Expressed by immature dendritic cells (at protein level). {ECO:0000269|PubMed:18852879}.	0.408116	0.596674	0.20502		0.880748	A0A024RCR6;A0A0G2JK23;P46379;P46379-2;P46379-3	28	BAG6;Large proline-rich protein BAG6;Large proline-rich protein BAG6;Isoform 2 of Large proline-rich protein BAG6;Isoform 3 of Large proline-rich protein BAG6	BAG6
15.0797	15.0465	15.3372	16.9748	14.865	15.8178	16.1008	15.8147	14.357	15.8559	15.9788	16.4245	15.9456	16.205	15.63	15.6163	16.2016	14.4434	14.5301	TISSUE SPECIFICITY: Isoform 1 and isoform 4 are expressed almost exclusively in brain. Isoform 4 is barely detectable in placenta, prostate and testis. A short isoform is ubiquitous, with the highest expression in liver, prostate, testis and placenta. {ECO:0000269|PubMed:10332026, ECO:0000269|PubMed:10343108, ECO:0000269|PubMed:11157984}.	0.246022	0.73723	-0.194962		-0.583047	Q9UQB8-5	14	Isoform 5 of Brain-specific angiogenesis inhibitor 1-associated protein 2	BAIAP2
16.0692	16.9361	15.8946	17.7942	17.7582	16.7751	18.1549	16.11	17.4757	17.3977	16.489	15.7968	15.8638	16.8419	15.8361	16.8646	15.6566	16.3478	18.1552	NA	0.637695	0.435235	0.471509		1.24421	Q9UHR4	32	Brain-specific angiogenesis inhibitor 1-associated protein 2-like protein 1	BAIAP2L1
18.1415	16.9123	15.5396	13.2435	14.8486	15.5741	13.4152	15.8903	13.2242	15.9779	16.3044	17.4133	16.5819	11.6855	12.3442	15.4162	15.5186	15.7979	21.1615	NA;TISSUE SPECIFICITY: Expressed in a wide variety of tissues, with highest levels in the heart and skeletal muscle.	0.257568	0.727559	-0.621329		-0.605837	A0A0A0MRG8;Q16611;Q16611-2	2	Bcl-2 homologous antagonist/killer;Bcl-2 homologous antagonist/killer;Isoform 2 of Bcl-2 homologous antagonist/killer	BAK1
20.0238	17.9819	19.179	20.8716	21.3209	19.8226	24.3511	21.3971	24.8271	19.6892	19.022	19.6855	19.5368	19.2929	19.743	18.7166	18.705	18.6541	20.4352	TISSUE SPECIFICITY: Widely expressed. Expressed in colon, brain, heart, kidney, liver, lung, ovary, pancreas, placenta, prostate, skeletal muscle, small intestine, spleen and testis. Not detected in thymus and peripheral blood leukocytes.	1.51159	0.129193	1.73809	+	2.35514	O75531	20	Barrier-to-autointegration factor	BANF1
14.7657	14.718	13.7441	13.2426	12.7453	14.2366	14.6749	14.7008	15.5349	15.6638	14.5987	13.9238	14.0049	13.9817	14.8666	14.2875	14.3589	13.1966	14.2571	TISSUE SPECIFICITY: Down-regulated in breast cancer cell lines. {ECO:0000269|PubMed:16166625}.	0.0530838	0.935455	-0.0514382		-0.146892	Q8N9N5;Q8N9N5-2;Q8N9N5-3;Q8N9N5-4;Q8N9N5-5;Q8N9N5-6;Q8N9N5-7	6	Protein BANP;Isoform 2 of Protein BANP;Isoform 3 of Protein BANP;Isoform 4 of Protein BANP;Isoform 5 of Protein BANP;Isoform 6 of Protein BANP;Isoform 7 of Protein BANP	BANP
11.7252	13.5833	13.1743	12.9531	15.0449	13.0355	14.359	12.7301	14.0826	10.7178	13.0706	12.9687	12.716	12.5362	12.7303	13.1978	13.0259	12.4493	11.5959	NA;TISSUE SPECIFICITY: Highly expressed in testis, placenta and ovary. Expressed in breast. {ECO:0000269|PubMed:9528852}.	1.41849	0.143715	0.90893	+	2.24776	F8W6N3;Q92560	4	Ubiquitin carboxyl-terminal hydrolase;Ubiquitin carboxyl-terminal hydrolase BAP1	BAP1
16.775	17.6752	17.4759	20.4526	18.2041	17.9639	18.2887	18.0102	17.1184	18.9206	17.7456	17.1248	17.3946	18.0655	17.4259	17.5175	16.6196	17.2413	21.4569	NA	0.0278327	0.963526	0.0447551		0.0790407	Q8IXM2	12	Chromatin complexes subunit BAP18	BAP18
19.0826	15.7061	11.0034	13.1021	19.3012	18.0844	19.419	13.3368	19.579	16.0841	13.1358	12.5603	12.2296	12.7665	13.5551	16.9192	9.75478	11.0545	18.0399	NA	1.31865	0.165209	2.90277	+	2.1307	A0A087X2H0;Q99728;Q99728-2;Q99728-3	1	BRCA1-associated RING domain protein 1;BRCA1-associated RING domain protein 1;Isoform alpha of BRCA1-associated RING domain protein 1;Isoform beta of BRCA1-associated RING domain protein 1	BARD1
17.1492	16.5135	17.8813	18.7914	19.4594	17.8952	18.9231	18.6304	19.3271	18.5998	18.7279	18.6075	18.8288	18.5572	18.3756	17.2037	17.0425	17.8513	17.5317	TISSUE SPECIFICITY: Brain.	0.156891	0.822929	0.153022		0.396317	P80723	19	Brain acid soluble protein 1	BASP1
14.7415	15.6746	15.2241	15.6981	16.5529	16.7137	17.2443	15.4707	16.768	15.6302	15.5183	14.7201	15.1859	15.2152	15.7276	16.0728	16.3696	15.4823	15.3593	TISSUE SPECIFICITY: Expressed in a wide variety of tissues. Isoform Psi is found in glial tumors. Isoform Alpha is expressed in spleen, breast, ovary, testis, colon and brain, and at low levels in skin and lung. Isoform Sigma is expressed in spleen, breast, ovary, testis, lung, colon, brain and at low levels in skin. Isoform Alpha and isoform Sigma are expressed in pro-myelocytic leukemia, histio…	0.870874	0.312442	0.481623		1.57093	Q07812;Q07812-2;Q07812-5;Q07812-7;Q07812-8	6	Apoptosis regulator BAX;Isoform Beta of Apoptosis regulator BAX;Isoform Epsilon of Apoptosis regulator BAX;Isoform Psi of Apoptosis regulator BAX;Isoform Sigma of Apoptosis regulator BAX	BAX
14.3474	15.6898	13.4855	16.4636	15.4479	14.7339	17.7201	14.2212	17.8552	16.1543	14.1677	12.2935	14.8095	15.6691	12.8037	13.7897	14.4014	14.3872	15.1516	TISSUE SPECIFICITY: Highly expressed in testis and at low or undetectable levels in other tissues analyzed.	1.11991	0.218575	1.18885		1.89043	Q9NRL2;Q9NRL2-2	19	Bromodomain adjacent to zinc finger domain protein 1A;Isoform 2 of Bromodomain adjacent to zinc finger domain protein 1A	BAZ1A
15.1231	15.6532	15.04	15.7965	16.0481	15.5839	17.1097	15.9462	17.2198	16.2346	14.907	16.0053	15.8667	16.0217	15.6224	15.0545	15.5914	14.7679	16.2791	TISSUE SPECIFICITY: Ubiquitously expressed with high levels of expression in heart, brain, placenta, skeletal muscle and ovary.	0.494559	0.531914	0.31166		1.02394	Q9UIG0;Q9UIG0-2	46	Tyrosine-protein kinase BAZ1B;Isoform 2 of Tyrosine-protein kinase BAZ1B	BAZ1B
15.1269	16.5859	15.234	18.4882	15.3792	16.0548	16.682	14.9307	16.7511	16.0336	15.7216	15.347	14.9825	15.1771	15.8705	15.2937	14.6035	15.09	16.6316	NA;TISSUE SPECIFICITY: Expressed at moderate levels in most tissues analyzed, including heart, brain, placenta, lung, skeletal muscle, kidney and pancreas.	0.908386	0.295562	0.66188		1.62068	F8VU39;J3KPG5;Q9UIF9;Q9UIF9-2;Q9UIF9-3	15	Bromodomain adjacent to zinc finger domain protein 2A;Bromodomain adjacent to zinc finger domain protein 2A;Bromodomain adjacent to zinc finger domain protein 2A;Isoform 1 of Bromodomain adjacent to zinc finger domain protein 2A;Isoform 3 of Bromodomain adjacent to zinc finger domain protein 2A	BAZ2A
12.1466	12.6168	11.377	14.1819	11.7974	11.3323	12.217	12.9968	10.7949	13.2364	12.8631	11.4366	12.9697	12.1126	14.6897	10.8853	12.1287	10.4843	11.6983	NA	0.0613257	0.9278	-0.0881697		-0.168332	A8MTZ0;A8MTZ0-2;A8MTZ0-3	1	BBSome-interacting protein 1;Isoform 2 of BBSome-interacting protein 1;Isoform 3 of BBSome-interacting protein 1	BBIP1
13.7003	14.0795	12.6719	12.7358	12.8513	12.9322	13.2272	14.3161	12.0591	13.7644	12.7558	13.5034	13.2365	14.0768	14.9053	10.5075	13.0443	13.0724	11.7586	NA;TISSUE SPECIFICITY: Widely expressed.	0.0895767	0.900514	0.112318		0.239446	H3BRL0;Q9BXC9	2	Bardet-Biedl syndrome 2 protein homolog;Bardet-Biedl syndrome 2 protein	BBS2
13.6044	13.4814	10.9161	12.8948	14.4254	12.6712	12.9649	14.3067	13.4695	10.7678	12.9202	12.8287	11.6767	11.6651	12.5587	12.4983	13.1829	10.9387	13.0448	TISSUE SPECIFICITY: Isoform 2 is ubiquitously expressed. Isoform 1 is expressed in retina, lung, liver, testis, ovary, prostate, small intestine, liver, brain, heart and pancreas.	NaN	1	0		NaN	Q8IWZ6;Q8IWZ6-2	1	Bardet-Biedl syndrome 7 protein;Isoform 2 of Bardet-Biedl syndrome 7 protein	BBS7
11.9752	11.8642	11.1235	12.381	13.5665	12.4388	14.0235	12.1519	14.0218	13.191	14.3518	12.8039	10.6084	11.6954	12.501	10.8089	11.4164	11.4281	11.5677	NA;TISSUE SPECIFICITY: Widely expressed. Expressed in adult heart, skeletal muscle, lung, liver, kidney, placenta and brain, and in fetal kidney, lung, liver and brain. {ECO:0000269|PubMed:10221542, ECO:0000269|PubMed:16380913}.	NaN	1	0		NaN	A0A5F9ZH14;A0A5F9ZH37;A0A5F9ZH74;A0A5F9ZHE7;A0A5F9ZHP5;Q3SYG4;Q3SYG4-2;Q3SYG4-3;Q3SYG4-4;Q3SYG4-7	2	Protein PTHB1;Protein PTHB1;Protein PTHB1;Protein PTHB1;Protein PTHB1 (Fragment);Protein PTHB1;Isoform 2 of Protein PTHB1;Isoform 3 of Protein PTHB1;Isoform 4 of Protein PTHB1;Isoform 7 of Protein PTHB1	BBS9
9.22408	10.859	11.5085	12.9798	12.0785	12.1	10.0888	11.9422	12.95	12.8566	12.7938	12.4768	13.1213	12.1027	13.2008	8.81258	9.34228	7.89043	13.6067	NA	NaN	1	0		NaN	C9JA69;Q8WY36;Q8WY36-2	2	HMG box transcription factor BBX;HMG box transcription factor BBX;Isoform 2 of HMG box transcription factor BBX	BBX
16.4266	15.6086	18.1099	17.3328	16.9681	16.5843	18.5264	17.9555	17.632	15.6515	17.062	18.1301	17.5849	17.0132	16.9028	15.1529	16.3706	16.8297	16.8459	NA;TISSUE SPECIFICITY: Wide tissue distribution (highest in the pancreas and very low in brain). Closely associated with the basal layer of cells in epithelia and the endothelium of blood vessel walls.	0.592454	0.462801	0.483887		1.17654	A0A087WXM8;P50895	27	Basal cell adhesion molecule	BCAM
19.9114	19.732	19.1682	20.7503	19.8404	19.9166	20.0926	19.1799	21.3116	19.4159	20.0481	20.1307	18.8062	19.4356	19.472	19.5745	19.1624	19.6178	21.839	TISSUE SPECIFICITY: Ubiquitous. Highly expressed in neurons and discrete endocrine cells. {ECO:0000269|PubMed:11561007}.	0.29633	0.691421	0.239		0.680355	P51572;P51572-2	28	B-cell receptor-associated protein 31;Isoform 2 of B-cell receptor-associated protein 31	BCAP31
15.7464	16.7587	14.8339	16.6265	16.0117	15.8798	15.8532	15.2941	16.3003	17.0889	16.9198	13.0038	15.6263	16.3586	15.5536	16.0618	15.0025	15.2364	16.5754	NA;TISSUE SPECIFICITY: Widely expressed with an abundant expression in the testis. Low level of expression seen in the liver, thymus, and peripheral blood leukocytes. The protein has been detected in a B-cell line.	0.162108	0.8175	0.180027		0.40784	A0A2R8Y4C2;A0A2R8Y596;A0A2R8Y5C9;A0A2R8Y6M6;A0A2R8Y8C4;A0A2R8YFK2;A0A2R8YFS8;P56945;P56945-2;P56945-3;P56945-5;P56945-6;P56945-7;P56945-8	15	Breast cancer anti-estrogen resistance protein 1;Breast cancer anti-estrogen resistance protein 1;Breast cancer anti-estrogen resistance protein 1;Breast cancer anti-estrogen resistance protein 1;Breast cancer anti-estrogen resistance protein 1;Breast cancer anti-estrogen resistance protein 1;Breast cancer anti-estrogen resistance protein 1;Breast cancer anti-estrogen resistance protein 1;Isoform…	BCAR1
13.1851	11.5588	14.1563	12.3265	11.5816	11.581	13.5619	12.7418	12.4265	11.8763	13.0573	12.8092	12.7281	12.9626	13.4462	12.046	12.25	12.917	14.2359	TISSUE SPECIFICITY: Ubiquitously expressed. Found in several cancer cell lines, but not in nonmalignant breast tissue. {ECO:0000269|PubMed:10187783, ECO:0000269|PubMed:9582273}.	NaN	1	0		NaN	O75815;O75815-2;O75815-3	3	Breast cancer anti-estrogen resistance protein 3;Isoform 2 of Breast cancer anti-estrogen resistance protein 3;Isoform 3 of Breast cancer anti-estrogen resistance protein 3	BCAR3
15.8876	14.6933	18.0258	18.2985	11.0422	16.8976	14.0458	15.8515	18.2184	13.7256	19.9258	16.5101	15.6592	12.7677	16.5606	17.8461	14.1923	18.0174	16.8291	TISSUE SPECIFICITY: Highly expressed in the brain and, more specifically, in oligodendrocytes (at protein level). Expressed in the prostate, and at lower levels in testis, intestine and colon. Overexpressed in most breast cancer cell lines and down-regulated in some colorectal tumors. {ECO:0000269|PubMed:10857754, ECO:0000269|PubMed:14567997, ECO:0000269|PubMed:29212715}.	0.116972	0.866606	-0.318874		-0.305245	O75363	27	Breast carcinoma-amplified sequence 1	BCAS1
15.0996	15.4447	15.2408	15.8997	15.575	14.8905	16.4864	16.1181	16.0149	16.1843	15.6092	15.5364	15.5553	15.7743	15.3118	15.0245	15.8903	14.9633	14.9231	TISSUE SPECIFICITY: Ubiquitously expressed. {ECO:0000269|PubMed:10403562}.	0.336349	0.656852	0.163828		0.754375	O75934	16	Pre-mRNA-splicing factor SPF27	BCAS2
14.4143	14.8037	15.0194	14.6424	15.2011	13.8678	15.963	15.0571	14.2695	12.1449	14.2811	13.3464	15.0392	14.8626	15.1922	13.7048	14.9079	14.0668	15.8741	TISSUE SPECIFICITY: Expressed in stomach, liver, lung, kidney, prostate, testis, thyroid gland, adrenal gland, brain, heart, skeletal muscle, colon, spleen, small intestine, placenta, blood leukocyte and mammary epithelial cells. Expressed in undifferentiated ES cells. Expressed in blood islands and nascent blood vessels derived from differentiated ES cells into embryoid bodies (BD). Expressed in…	0.564001	0.481769	0.46227		1.13311	Q9H6U6;Q9H6U6-2;Q9H6U6-3;Q9H6U6-7;Q9H6U6-8	8	Breast carcinoma-amplified sequence 3;Isoform 1 of Breast carcinoma-amplified sequence 3;Isoform 3 of Breast carcinoma-amplified sequence 3;Isoform 5 of Breast carcinoma-amplified sequence 3;Isoform 4 of Breast carcinoma-amplified sequence 3	BCAS3
14.8229	13.9617	13.8523	12.7084	17.2969	13.7944	15.7802	14.7333	16.2815	16.5185	16.7717	15.7852	12.3068	13.5032	15.44	12.1534	12.8799	11.286	12.864	TISSUE SPECIFICITY: During embryogenesis, expressed in the brain and kidney. Overexpressed in MYC-induced tumors such as Burkitt's lymphoma.	0.517322	0.51559	0.852647		1.06025	P54687;P54687-4;P54687-5	3	Branched-chain-amino-acid aminotransferase, cytosolic;Isoform 4 of Branched-chain-amino-acid aminotransferase, cytosolic;Isoform 5 of Branched-chain-amino-acid aminotransferase, cytosolic	BCAT1
16.2751	17.5519	16.0191	17.3255	16.1489	17.0536	16.7291	15.4943	17.087	16.9341	16.2324	15.3062	16.2687	16.6417	16.6453	16.6668	17.0034	16.0966	16.5064	TISSUE SPECIFICITY: Expressed at high levels in testis and skeletal muscle and at lower levels in brain, heart, kidney, liver, lung, ovary, pancreas, placenta, and spleen. {ECO:0000269|PubMed:10878006, ECO:0000269|PubMed:11313963}.	0.329832	0.661994	0.201451		0.742509	Q9P287	9	BRCA2 and CDKN1A-interacting protein	BCCIP
13.2447	15.0942	17.7925	12.1401	18.1878	15.0635	13.5203	16.5444	13.1524	15.5478	16.5674	18.4173	16.8841	17.2973	17.9346	15.8034	10.3569	15.5849	13.1744	TISSUE SPECIFICITY: Detected in blood plasma (at protein level). Present in most cells except erythrocytes. {ECO:0000269|PubMed:19368529, ECO:0000269|PubMed:19542320}.	0.33197	0.660166	-0.785755		-0.74641	P06276	8	Cholinesterase	BCHE
18.3282	16.8606	17.509	17.7235	17.2191	17.9272	18.882	16.5967	19.1561	16.4733	16.6471	16.8519	16.9004	16.5324	16.5064	16.5036	17.1663	16.975	17.0997	NA	2.64494	0.0316049	1.03466	+	3.58845	F5H5P2;P12694	26	2-oxoisovalerate dehydrogenase subunit alpha;2-oxoisovalerate dehydrogenase subunit alpha, mitochondrial	BCKDHA
15.8979	15.1179	16.4532	17.1511	14.2727	16.0564	16.0872	15.0782	16.1687	15.4437	16.001	12.356	15.2114	15.5635	16.4127	15.3204	17.1912	16.3818	16.5044	NA	0.127993	0.854985	0.170638		0.330926	P21953	10	2-oxoisovalerate dehydrogenase subunit beta, mitochondrial	BCKDHB
15.4213	14.8465	15.0582	18.8966	16.0041	15.5733	18.3474	15.2045	18.4697	16.084	16.1438	16.9034	15.6187	17.0687	16.2471	15.0109	15.2671	14.4774	14.7094	TISSUE SPECIFICITY: Ubiquitous.	0.557084	0.486466	0.671569		1.12244	O14874	12	[3-methyl-2-oxobutanoate dehydrogenase [lipoamide]] kinase, mitochondrial	BCKDK
16.9613	17.9673	16.6645	16.3525	12.6854	15.2271	14.2278	16.0459	14.8976	16.9751	18.0942	17.0481	15.0544	17.4951	16.217	16.2758	15.5092	15.8183	16.4616	NA;TISSUE SPECIFICITY: Ubiquitous. {ECO:0000269|PubMed:9989495}.	0.7444	0.373314	-0.824968		-1.39784	A0A087WWW9;O95999	4	B-cell lymphoma/leukemia 10	BCL10
13.4504	12.1357	15.0129	13.5869	16.3779	13.6615	14.591	13.8102	15.5955	12.9158	13.0269	12.8798	13.3788	12.9432	13.0106	11.8656	11.3524	14.2496	14.0044	TISSUE SPECIFICITY: Expressed in a variety of tissues.	1.71634	0.0974111	1.28416	+	2.58631	P10415;P10415-2	2	Apoptosis regulator Bcl-2;Isoform Beta of Apoptosis regulator Bcl-2	BCL2
15.2802	16.4392	15.7716	18.1968	12.5834	15.3491	17.2245	15.8566	17.3177	15.3547	15.3092	12.9331	16.5981	15.9778	16.1509	16.0759	16.5871	15.8282	17.4548	NA;TISSUE SPECIFICITY: Bcl-X(S) is expressed at high levels in cells that undergo a high rate of turnover, such as developing lymphocytes. In contrast, Bcl-X(L) is found in tissues containing long-lived postmitotic cells, such as adult brain.	0.10225	0.883261	0.175138		0.270248	Q07817;Q07817-3;Q5QP56;Q5TE64;Q9H1R6	3	Bcl-2-like protein 1;Isoform Bcl-X(beta) of Bcl-2-like protein 1;Bcl-2-like protein 1 (Fragment);Bcl-2-like protein 1 (Fragment);Bcl-2-like protein 1 (Fragment)	BCL2L1
11.9976	12.6293	13.0107	13.5432	12.6006	13.0919	13.7783	12.7483	14.7622	13.7159	12.2598	13.4912	12.0582	12.2089	14.8796	13.1222	11.4537	11.9388	12.1523	TISSUE SPECIFICITY: Isoform BimEL, isoform BimL and isoform BimS are the predominant isoforms and are widely expressed with tissue-specific variation. Isoform Bim-gamma is most abundantly expressed in small intestine and colon, and in lower levels in spleen, prostate, testis, heart, liver and kidney. {ECO:0000269|PubMed:12019181}.	0.435178	0.575026	0.401065		0.926543	O43521;O43521-12;O43521-2;O43521-3;O43521-4;O43521-5;O43521-6;O43521-7;O43521-8;O43521-9	2	Bcl-2-like protein 11;Isoform Bim-beta3 of Bcl-2-like protein 11;Isoform BimL of Bcl-2-like protein 11;Isoform BimS of Bcl-2-like protein 11;Isoform Bim-alpha1 of Bcl-2-like protein 11;Isoform Bim-alpha2 of Bcl-2-like protein 11;Isoform Bim-alpha3 of Bcl-2-like protein 11;Isoform Bim-alpha4 of Bcl-2-like protein 11;Isoform Bim-alpha5 of Bcl-2-like protein 11;Isoform Bim-alpha6 of Bcl-2-like prote…	BCL2L11
14.4479	15.2186	14.6049	16.3666	15.5653	15.6741	16.066	15.1781	15.8635	14.0623	14.0996	13.1288	13.2625	12.9998	13.7347	14.6696	14.9639	14.4509	13.4773	NA;TISSUE SPECIFICITY: Ubiquitous, with the highest levels of expression in heart, placenta and pancreas.	4.08345	0.010875	1.55785	+	5.13602	A0A087WX97;Q9BXK5	11	Bcl-2-like protein 13	BCL2L13
13.0674	14.6375	15.5749	12.9446	14.0138	11.8676	14.0208	11.4665	12.9593	12.3733	15.1871	12.0227	12.3553	12.5806	12.4393	14.5283	14.2412	14.7967	14.9453	NA;TISSUE SPECIFICITY: Isoform 1 is widely expressed. Isoform 2 is testis-specific. {ECO:0000269|PubMed:11054413}.	NaN	1	0		NaN	K7EMX4;Q9BZR8	4	Apoptosis facilitator Bcl-2-like protein 14	BCL2L14
12.8429	12.0214	16.3725	13.149	11.7599	13.0624	11.9716	13.527	14.19	13.055	16.6178	15.1731	13.8754	14.7151	13.7168	14.3681	15.2473	16.0449	17.2581	NA	1.94143	0.0712459	-1.79641	+	-2.83445	Q5TBC7	4	Bcl-2-like protein 15	BCL2L15
18.7232	19.1519	17.7436	18.7224	18.1125	18.2843	17.9233	18.6262	17.6377	18.2036	16.8562	16.9869	17.4662	18.0154	17.018	18.0677	18.4311	17.9914	18.4491	TISSUE SPECIFICITY: Expressed (at protein level) in a wide range of tissues with highest levels in brain, spinal cord, testis, pancreas, heart, spleen and mammary glands. Moderate levels found in thymus, ovary and small intestine. Not detected in salivary gland, muscle or liver. Also expressed in cell lines of myeloid, fibroblast and epithelial origin. Not detected in most lymphoid cell lines. {E…	1.38325	0.151084	0.57645	+	2.20669	Q92843-2	11	Isoform 3 of Bcl-2-like protein 2	BCL2L2
16.0968	16.3144	14.9704	12.0973	13.2774	16.1843	15.9274	14.3819	16.2579	16.5586	13.022	13.2648	12.6657	11.6189	16.3292	15.4821	17.1037	14.8048	13.0026	NA	0.384427	0.614231	0.671191		0.839863	Q4VC05;Q4VC05-2	4	B-cell CLL/lymphoma 7 protein family member A;Isoform 2 of B-cell CLL/lymphoma 7 protein family member A	BCL7A
14.5358	15.3089	13.9182	13.9708	14.5599	13.5105	15.5679	15.0067	15.4702	16.0985	15.46	14.8095	16.2797	16.2048	13.1517	14.0726	13.9687	13.0411	15.2202	NA;TISSUE SPECIFICITY: Ubiquitous. {ECO:0000269|PubMed:9931421}.	0.15121	0.829533	-0.180771		-0.383674	I3L1Q2;Q8WUZ0;Q8WUZ0-2	4	B-cell CLL/lymphoma 7 protein family member C (Fragment);B-cell CLL/lymphoma 7 protein family member C;Isoform 2 of B-cell CLL/lymphoma 7 protein family member C	BCL7C
12.998	14.13	13.6979	17.319	18.2994	13.815	13.5118	14.0687	13.3388	19.6506	12.0163	12.2042	19.4694	12.2768	19.5123	13.6501	13.2366	13.842	19.1783	NA;TISSUE SPECIFICITY: Expressed in breast, ductal and invasive ductal carcinomas of the breast, sporadic colorectal adenomas and carcinomas (at protein level). Expressed in fetal brain. Expressed in lung, amygdala, eye, prostate, pancreatic and prostate cancers, head and neck tumors and embryonal tumor. {ECO:0000269|PubMed:12964048, ECO:0000269|PubMed:17129358, ECO:0000269|PubMed:17309600}.	0.314997	0.675424	-0.928264		-0.715229	A0A087WZX0;Q86UU0;Q86UU0-2;Q86UU0-3;Q86UU0-4	5	B-cell CLL/lymphoma 9-like protein;B-cell CLL/lymphoma 9-like protein;Isoform 2 of B-cell CLL/lymphoma 9-like protein;Isoform 3 of B-cell CLL/lymphoma 9-like protein;Isoform 4 of B-cell CLL/lymphoma 9-like protein	BCL9L
17.7301	17.9243	17.6918	19.807	17.0738	18.1914	18.5369	17.7839	18.0285	19.0029	18.4187	17.7363	17.7135	18.5889	18.1074	17.4699	18.3496	17.4688	17.748	TISSUE SPECIFICITY: Ubiquitous.	0.0298173	0.962026	0.0249258		0.0844988	Q9NYF8;Q9NYF8-2	29	Bcl-2-associated transcription factor 1;Isoform 2 of Bcl-2-associated transcription factor 1	BCLAF1
12.3874	12.2718	11.6549	13.8888	12.3968	11.6267	14.0761	11.1229	13.407	12.9478	12.1394	11.5639	11.5648	11.7228	11.9353	12.4293	11.837	12.1565	11.7326	NA;TISSUE SPECIFICITY: Ubiquitously expressed. {ECO:0000269|PubMed:10898795}.	NaN	1	0		NaN	H7C231;Q6W2J9;Q6W2J9-2;Q6W2J9-4	3	BCL-6 corepressor (Fragment);BCL-6 corepressor;Isoform 2 of BCL-6 corepressor;Isoform 4 of BCL-6 corepressor	BCOR
14.4585	14.9428	14.2833	16.3225	15.2151	15.0177	14.8588	14.5021	14.1899	15.1413	14.8673	13.8831	14.4612	14.2763	13.9826	14.861	14.6647	14.1322	14.945	NA	0.723052	0.38506	0.344186		1.36772	P11274	11	Breakpoint cluster region protein	BCR
15.3716	14.1955	15.259	16.1221	15.024	15.9273	13.684	13.6268	13.2897	14.2449	13.2387	13.8684	12.2048	13.7933	13.2609	15.0316	14.9886	14.2101	13.5086	TISSUE SPECIFICITY: Ubiquitous. {ECO:0000269|PubMed:9878253}.	1.23643	0.186941	0.887246		2.03258	Q9Y276	14	Mitochondrial chaperone BCS1	BCS1L
18.9861	17.5975	18.4622	18.0004	11.7862	18.3417	18.9206	16.6279	17.893	16.1834	18.5538	16.9579	16.8795	17.4032	17.6161	17.9623	17.3351	16.9661	18.7412	NA	0.027296	0.96424	-0.0581041		-0.0775606	Q02338	18	D-beta-hydroxybutyrate dehydrogenase, mitochondrial	BDH1
17.8075	17.5398	18.6282	18.2148	17.6954	18.2127	15.5314	18.0128	14.1868	18.1304	18.6302	19.159	19.1797	18.124	19.0544	17.2751	17.0989	18.2891	15.911	TISSUE SPECIFICITY: Detected in liver (at protein level). {ECO:0000269|PubMed:22527885}.	0.693685	0.40094	-0.770819		-1.32579	Q9BUT1	11	3-hydroxybutyrate dehydrogenase type 2	BDH2
10.6932	17.8019	18.282	12.7686	12.6666	18.0071	14.1887	17.9222	13.2614	17.0145	12.239	18.6553	12.7851	11.9701	12.9619	17.7808	18.099	17.3791	12.2543	NA;TISSUE SPECIFICITY: Isoform 2 is highly expressed in cerebellum. {ECO:0000269|PubMed:11161782}.	NaN	1	0		NaN	A0A0G2JNU3;A6H8Y1;A6H8Y1-2;A6H8Y1-6;A6H8Y1-7;H7C5U4	1	Transcription factor TFIIIB component B'' homolog;Transcription factor TFIIIB component B'' homolog;Isoform 2 of Transcription factor TFIIIB component B'' homolog;Isoform 6 of Transcription factor TFIIIB component B'' homolog;Isoform 7 of Transcription factor TFIIIB component B'' homolog;Transcription factor TFIIIB component B'' homolog (Fragment)	BDP1
15.6358	15.9494	14.3909	16.365	15.9414	16.0556	16.2336	15.8963	16.4989	13.8136	16.2181	14.4432	14.5094	14.2713	11.6651	15.344	14.0754	14.6827	15.3479	TISSUE SPECIFICITY: Ubiquitous.	2.30871	0.0452756	1.44816	+	3.23066	Q14457	8	Beclin-1	BECN1
11.2219	12.8364	11.3916	12.724	10.9758	13.3604	15.1676	10.864	13.5801	14.339	12.8587	12.0523	12.5387	12.3095	13.072	12.3054	12.3522	12.0935	11.2797	TISSUE SPECIFICITY: Expressed at least in heart, kidney, liver, ovary and spleen, with highest levels in spleen and lowest in heart. Expressed on the surface of T-cells. {ECO:0000269|PubMed:21914818, ECO:0000269|PubMed:25400923}.	0.0416877	0.949506	-0.0621162		-0.116689	Q5T5X7	11	BEN domain-containing protein 3	BEND3
11.3994	12.557	11.7674	11.8739	11.0636	12.1708	13.7451	12.6676	12.9714	12.8478	13.0238	12.8314	12.3161	12.9123	13.1865	11.8164	11.496	12.6326	11.3565	TISSUE SPECIFICITY: Predominantly found in colon and the weakly in fetal brain, spinal cord, retina, lung, trachea, testis and placenta. {ECO:0000269|PubMed:12032738}.	NaN	1	0		NaN	Q8NFU0	2	Bestrophin-4	BEST4
19.8987	18.8648	14.7105	14.0037	11.9682	18.1999	17.5553	16.6596	18.7953	19.1507	11.8498	12.6355	19.5824	16.7749	17.6105	16.6139	15.0857	15.647	11.642	NA	0.391231	0.609339	1.08031		0.851685	A0A0C4DH16;B8ZZS0;H7BXT7;Q9NYM9	2	BET1-like protein	BET1L
23.1281	20.3154	20.9295	19.9396	21.8237	20.2902	23.2346	21.67	23.6123	21.6958	20.0686	21.2729	21.6616	21.0332	20.6862	17.3688	18.6662	18.369	17.4557	NA	1.67293	0.103822	1.83257	+	2.5378	C9JKG1	13	Biglycan (Fragment)	BGN
11.9338	12.7805	13.991	15.3701	13.2479	13.6966	13.9921	13.0374	13.2969	14.6902	13.2565	16.5053	15.8378	11.1643	15.9187	13.6905	12.7119	14.2004	14.356	TISSUE SPECIFICITY: Expressed in brain, liver, spleen and skeletal muscle. {ECO:0000269|PubMed:14516699}.	0.612954	0.450507	-0.750237		-1.20741	Q7RTS1	5	Class A basic helix-loop-helix protein 15	BHLHA15
11.893	12.6713	13.9407	16.6184	12.2531	12.2551	12.5803	15.1783	14.2323	15.682	16.231	15.0142	14.8373	14.6392	15.6505	14.6918	15.0252	13.3532	13.0936	NA;TISSUE SPECIFICITY: Expressed in the brain, heart and skeletal muscle.	1.35483	0.156331	-1.30819	+	-2.17337	A8MVZ6;Q96G01;Q96G01-3;Q96G01-4	5	BICD1 protein;Protein bicaudal D homolog 1;Isoform 3 of Protein bicaudal D homolog 1;Isoform 4 of Protein bicaudal D homolog 1	BICD1
14.7859	14.883	13.9871	14.4408	15.8559	14.503	16.0617	15.4303	15.7911	14.429	16.1917	14.5549	14.8732	14.8949	14.4202	13.6797	13.7063	13.6194	14.1921	TISSUE SPECIFICITY: Ubiquitous.	1.05918	0.236327	0.625944		1.81467	Q8TD16;Q8TD16-2	14	Protein bicaudal D homolog 2;Isoform 2 of Protein bicaudal D homolog 2	BICD2
11.7657	12.5148	13.7451	17.0089	11.8718	13.4239	14.1994	11.8386	13.3378	12.9047	13.2273	12.6869	12.3287	12.5152	11.846	14.0254	12.5631	13.147	16.6153	NA	NaN	1	0		NaN	A0A2R8Y2X6;A1A5D9	7	BICD family-like cargo adapter 2	BICDL2
16.6267	17.6082	16.7379	19.7342	16.3662	17.2714	17.5182	16.7735	17.8005	16.1637	16.0782	15.5091	16.3823	15.1365	15.652	16.7459	16.8759	16.8525	16.8555	TISSUE SPECIFICITY: Isoform 2 and isoform 3 are expressed in spleen, bone marrow, cerebral and cerebellar cortex. Isoform 2 is expressed in spleen, pancreas and placenta (at protein level). Isoform 3 is expressed in lung, pancreas and spleen (at protein level). Isoform 4 is expressed in lung and pancreas (at protein level). {ECO:0000269|PubMed:14583606}.	2.12127	0.0576294	1.15671	+	3.02948	P55957;P55957-2	8	BH3-interacting domain death agonist;Isoform 2 of BH3-interacting domain death agonist	BID
16.6778	16.6174	16.63	17.1752	16.5333	16.1102	17.1778	16.3969	16.1499	15.8741	16.1771	15.963	15.7158	15.7005	15.4457	15.9127	15.2007	15.7564	16.6961	TISSUE SPECIFICITY: Ubiquitous. Highest expression in the brain and muscle (PubMed:9182667). Expressed in oligodendrocytes (PubMed:27488240). Isoform IIA is expressed only in the brain, where it is detected in the gray matter, but not in the white matter (PubMed:27488240). Isoform BIN1 is widely expressed with highest expression in skeletal muscle. {ECO:0000269|PubMed:10903846, ECO:0000269|PubMed…	3.24072	0.0187429	0.763414	+	4.22139	O00499-2;O00499-6	17	Isoform IIB of Myc box-dependent-interacting protein 1;Isoform II2 of Myc box-dependent-interacting protein 1	BIN1
13.3789	13.6457	14.2609	16.7149	15.2774	13.7847	14.7014	15.0084	15.3575	14.4194	14.0053	14.0452	15.0005	12.6007	14.7222	14.855	12.5631	14.5038	12.344	TISSUE SPECIFICITY: Detected in natural killer cells (at protein level). Highest level expression seen in spleen and peripheral blood leukocytes and is also expressed at high levels in thymus, colon and placenta, suggesting preferential expression in hematopoietic tissues. {ECO:0000269|PubMed:10903846, ECO:0000269|PubMed:23285027}.	0.916983	0.291058	0.775159		1.632	A0A087X188;Q9UBW5;Q9UBW5-2	12	Bridging integrator 2;Bridging integrator 2;Isoform 2 of Bridging integrator 2	BIN2
15.9476	16.0263	14.5585	15.7228	15.4148	15.6477	13.8214	15.8529	15.2013	15.904	14.3442	15.8152	14.2302	15.2332	15.391	14.0304	14.7072	14.3601	15.0787	TISSUE SPECIFICITY: Ubiquitously expressed except in brain. {ECO:0000269|PubMed:11274158}.	0.73367	0.379132	0.445408		1.38273	Q9NQY0	10	Bridging integrator 3	BIN3
12.125	12.9674	13.686	15.8203	13.2792	14.535	14.6574	13.4113	15.8891	14.1845	13.2764	12.6637	13.5161	13.1696	13.4799	12.9395	13.598	12.7616	14.6749	NA;TISSUE SPECIFICITY: Present in many fetal and adult tissues. Mainly expressed in adult skeletal muscle, thymus, testis, ovary, and pancreas, low or absent in brain and peripheral blood leukocytes.	0.711832	0.391928	0.614757		1.35177	E9PMH5;Q13490;Q13490-2	7	Baculoviral IAP repeat-containing protein 2;Baculoviral IAP repeat-containing protein 2;Isoform 2 of Baculoviral IAP repeat-containing protein 2	BIRC2
15.4391	16.4172	15.764	16.4006	16.0504	16.2711	16.4028	14.8473	16.8686	16.172	15.8454	14.8229	14.8639	15.1784	15.8782	15.7065	15.2433	15.695	15.9993	NA	1.2401	0.18624	0.51075		2.037	A0A3B3IUB9	48	Baculoviral IAP repeat-containing protein 6 (Fragment)	BIRC6
20.9638	21.7019	20.7074	22.5811	21.474	21.2606	21.9716	14.4466	21.9071	21.752	20.7884	21.1237	21.442	21.7183	21.2139	20.763	20.6572	20.7236	21.2815	NA	0.190798	0.789747	-0.367015		-0.469799	A0A3B3IT82;H0YNU5;P54132	3	Bloom syndrome protein	BLM
16.2531	16.6372	16.8667	16.96	16.2382	16.5131	17.6616	16.6126	17.4915	16.9278	16.9952	16.8588	16.8324	16.5237	17.2823	16.4917	17.2841	16.7291	16.681	NA	0.119401	0.86456	-0.0568174		-0.310942	Q13867	18	Bleomycin hydrolase	BLMH
16.8563	16.8475	16.699	15.7	16.3448	17.2953	17.7806	16.4614	18.2658	17.2217	17.4981	16.5732	16.7866	17.4549	16.6579	15.9289	16.592	16.0715	17.018	NA	0.182715	0.796641	0.136477		0.452577	G8JLQ3;P78537;P78537-2	5	Biogenesis of lysosome-related organelles complex 1 subunit 1;Biogenesis of lysosome-related organelles complex 1 subunit 1;Isoform 2 of Biogenesis of lysosome-related organelles complex 1 subunit 1	BLOC1S1
15.144	15.704	15.6901	11.2678	11.4686	14.6525	17.2443	16.5412	17.969	16.18	17.0569	15.9888	16.2029	15.8664	15.6489	15.144	15.6212	15.31	16.9392	TISSUE SPECIFICITY: Isoform 1 and isoform 2 are widely expressed. Expressed in various malignant tumor tissues (at protein level). {ECO:0000269|PubMed:15381421}.	0.608779	0.453085	-0.920133		-1.20115	Q6QNY1	3	Biogenesis of lysosome-related organelles complex 1 subunit 2	BLOC1S2
14.9303	15.5595	14.8415	13.7482	13.4301	16.5322	17.5874	15.9001	16.7962	14.0654	17.08	14.684	15.1195	15.1864	12.2808	15.5277	15.9154	14.9767	17.983	NA	0.111306	0.873971	0.198745		0.291871	Q6QNY0	4	Biogenesis of lysosome-related organelles complex 1 subunit 3	BLOC1S3
14.6056	15.2231	15.0334	13.0162	11.8244	15.265	12.6796	16.068	12.0364	12.7178	15.9153	13.2008	11.5093	12.5812	12.9783	14.5624	15.2568	14.4778	14.5777	NA	NaN	1	0		NaN	Q9NUP1	6	Biogenesis of lysosome-related organelles complex 1 subunit 4	BLOC1S4
15.3729	15.0673	15.821	11.9922	14.2754	15.7099	14.7834	15.6529	15.3645	14.9751	14.9031	13.6365	14.2914	14.7346	13.7101	15.7452	15.377	14.7072	13.283	NA	0.347752	0.647038	0.356952		0.774973	Q8TDH9;Q8TDH9-3	4	Biogenesis of lysosome-related organelles complex 1 subunit 5;Isoform 3 of Biogenesis of lysosome-related organelles complex 1 subunit 5	BLOC1S5
14.7609	15.3097	13.2506	12.6592	12.8587	14.6321	12.9712	14.2058	13.7726	15.4577	14.4331	14.1295	14.3278	14.7245	15.1735	14.3721	12.7097	12.8333	15.2186	NA;TISSUE SPECIFICITY: Widely expressed. {ECO:0000269|PubMed:12019270, ECO:0000269|PubMed:12191018}.	0.599135	0.458438	-0.513464		-1.18664	H3BST1;Q9UL45	3	Biogenesis of lysosome-related organelles complex 1 subunit 6	BLOC1S6
17.8216	17.2037	17.7174	17.3304	18.1398	17.6346	17.9368	18.8089	18.6636	18.371	18.1501	19.3408	18.7755	18.3612	19.1336	17.395	16.6876	17.0817	17.7302	TISSUE SPECIFICITY: Liver.	0.227724	0.753718	-0.18525		-0.546329	P53004	11	Biliverdin reductase A	BLVRA
18.1531	18.6105	19.8984	19.4246	18.4267	17.7501	17.6714	19.3001	18.0842	17.947	18.8332	19.4454	18.3108	17.8516	18.8742	19.1945	18.1305	19.2058	19.4879	TISSUE SPECIFICITY: Predominantly expressed in liver and erythrocytes. At lower levels in heart, lung, adrenal gland and cerebrum. {ECO:0000269|PubMed:7929092}.	0.169511	0.810547	-0.137086		-0.424052	P30043	19	Flavin reductase (NADPH)	BLVRB
15.2361	15.4415	14.1727	14.8692	15.2889	15.1783	16.0241	15.1942	15.7396	14.822	15.1624	14.9597	14.0103	14.3618	13.8412	14.4183	14.5443	14.2937	14.8901	NA	2.32279	0.0446747	0.707918	+	3.2457	Q9NSY1	20	BMP-2-inducible protein kinase	BMP2K
11.1447	12.6036	13.4122	12.5704	12.1093	11.9127	13.6267	11.4532	10.8334	13.1551	12.1279	12.3707	12.8918	11.5495	14.4096	11.0691	10.3358	13.1741	12.4387	NA;TISSUE SPECIFICITY: Highly expressed in lung, and brain and also in primary chondrocytes. {ECO:0000269|PubMed:14766204}.	NaN	1	0		NaN	A0A3B3IRM9;A0A3B3ISL7;A0A3B3ITW7;A0A3B3ITY4;A0A3B3ITZ8;A0A3B3IUC5;Q8N8U9	2	BMP-binding endothelial regulator protein;BMP-binding endothelial regulator protein;BMP-binding endothelial regulator protein;BMP-binding endothelial regulator protein;BMP-binding endothelial regulator protein;BMP-binding endothelial regulator protein (Fragment);BMP-binding endothelial regulator protein	BMPER
12.2894	15.3296	11.6916	12.3234	15.2852	14.1508	15.4339	14.3411	16.042	14.4354	14.0111	15.2977	12.5779	15.0642	14.3585	12.7889	11.7798	13.5134	12.3261	NA;TISSUE SPECIFICITY: Highly expressed in heart and liver.	0.331232	0.660373	0.483243		0.745062	A0A1W2PPB5;Q13873;Q13873-2	1	Serine/threonine-protein kinase receptor;Bone morphogenetic protein receptor type-2;Isoform 2 of Bone morphogenetic protein receptor type-2	BMPR2
15.9821	17.1624	15.4651	17.0361	16.4909	16.6043	17.1507	15.9033	17.9905	16.8039	15.4983	15.956	15.9331	16.6702	16.5428	15.8015	16.383	15.0169	15.6992	NA	1.18513	0.201374	0.612314		1.97047	Q14692	22	Ribosome biogenesis protein BMS1 homolog	BMS1
20.3899	16.2872	18.4643	13.2926	18.982	18.7026	19.5485	18.6829	19.4669	19.3988	18.7014	20.2024	19.7755	19.1679	19.1141	18.0365	17.1156	17.5571	11.0703	NA;TISSUE SPECIFICITY: Highly expressed in testis, uterus and small intestine, and weakly expressed in colon and prostate. Also expressed in skin, primary keratinocytes, immortalized keratinocytes, and HeLa and HEK293 cells. Not detected in blood, thymus, spleen or Hep-G2 cells. {ECO:0000269|PubMed:14988505, ECO:0000269|PubMed:15081112}.	0.061711	0.927489	0.187921		0.169326	A0A1B0GX98;B1APH0;F5H586;H0Y6W5;Q06HB9;Q6ZN30;Q6ZN30-2	1	Zinc finger protein basonuclin-2 (Fragment);Zinc finger protein basonuclin-2;Zinc finger protein basonuclin-2;Zinc finger protein basonuclin-2 (Fragment);Basonuclin 2 (Fragment);Zinc finger protein basonuclin-2;Isoform 2 of Zinc finger protein basonuclin-2	BNC2
13.3875	11.9347	14.1175	15.0705	16.9694	14.2273	12.4793	15.9347	18.0178	12.7212	13.9315	13.0789	11.1137	12.6857	10.8281	10.4941	12.1008	13.2719	13.0552	NA	NaN	1	0		NaN	J3KN59;Q12982;Q12982-2	3	BCL2/adenovirus E1B 19 kDa protein-interacting protein 2;BCL2/adenovirus E1B 19 kDa protein-interacting protein 2;Isoform 2 of BCL2/adenovirus E1B 19 kDa protein-interacting protein 2	BNIP2
12.6789	12.3211	11.4142	12.6369	11.8835	12.0982	14.1353	13.3263	13.9397	12.7208	12.6026	12.0837	11.8005	10.9298	12.0781	11.8431	11.1112	10.964	13.1442	NA	NaN	1	0		NaN	H0YBC7;O60238;O60238-2	2	BCL2/adenovirus E1B 19 kDa protein-interacting protein 3-like (Fragment);BCL2/adenovirus E1B 19 kDa protein-interacting protein 3-like;Isoform 2 of BCL2/adenovirus E1B 19 kDa protein-interacting protein 3-like	BNIP3L
13.3453	13.5629	14.0412	14.0786	13.1506	15.7049	14.0853	13.0459	14.4327	12.5658	12.7054	12.8665	13.1212	13.4816	13.4023	14.5186	15.6339	13.5485	14.5127	NA	NaN	1	0		NaN	Q96IK1;Q96IK1-2	1	Biorientation of chromosomes in cell division protein 1;Isoform 2 of Biorientation of chromosomes in cell division protein 1	BOD1
15.3221	16.1352	14.7308	15.3861	15.3752	15.7677	15.5924	15.1807	15.7981	16.2889	15.4951	15.6578	15.3948	15.7177	16.1386	15.1785	15.0783	14.784	16.1632	NA	0.222795	0.758469	-0.113213		-0.536308	Q8NFC6	35	Biorientation of chromosomes in cell division protein 1-like 1	BOD1L1
14.9648	15.3335	14.2877	12.9154	16.0368	14.0105	15.9392	14.5549	15.492	13.1198	12.5392	13.4955	13.4537	13.9403	13.4925	13.0268	12.7275	11.9295	13.0683	TISSUE SPECIFICITY: Expressed mainly in oocytes;weak expression in granulosa cells of the developing follicles. In adult human ovaries, expressed in granulosa cells at all follicular stages, but expression in primordial/primary follicles granulosa cell is stronger than in secondary and antral follicles. {ECO:0000269|PubMed:20673843}.	3.72351	0.0146429	1.75789	+	4.74106	Q9UMX3	6	Bcl-2-related ovarian killer protein	BOK
15.7667	16.0602	15.4497	11.9108	12.3476	15.6753	16.9574	15.8423	17.0468	15.3755	13.8253	16.4437	12.8305	15.9404	14.5975	10.9952	15.1774	14.8039	13.1422	TISSUE SPECIFICITY: Widely expressed. {ECO:0000269|PubMed:18548201}.	0.572161	0.476396	0.915372		1.14564	Q9Y3E2	2	BolA-like protein 1	BOLA1
19.6882	20.2278	18.7784	23.4287	19.1507	19.864	20.3116	18.6514	20.1804	17.6792	17.5056	18.2586	18.0077	17.4656	17.6453	17.2201	18.3421	19.2652	22.2969	NA	1.61724	0.112085	1.66261	+	2.47519	A0A087WZT3;Q9H3K6	7	BolA-like protein 2	BOLA2B
15.9772	17.5804	14.916	18.1788	15.7029	16.9153	18.0683	15.1372	18.3158	16.3621	15.3227	16.2611	15.3783	15.3967	15.6927	15.5704	16.0899	14.6701	17.249	NA	1.17254	0.203811	0.955362		1.95512	Q14137	27	Ribosome biogenesis protein BOP1	BOP1
12.6462	12.0712	12.161	12.728	12.1686	11.5139	11.9024	20.4003	13.0518	15.6207	14.2024	16.2825	16.3835	15.6558	11.6566	13.9952	17.0394	12.166	19.0924	NA;TISSUE SPECIFICITY: Ubiquitously expressed (at protein level). {ECO:0000269|PubMed:11896457, ECO:0000269|PubMed:25898167}.	1.02092	0.249495	-2.02683		-1.76628	G3V1P3;Q969J3	3	BLOC-1-related complex subunit 5	BORCS5
14.8276	14.07	13.3923	14.5234	14.143	14.2762	14.3864	14.0054	14.8305	13.8431	15.0999	15.9047	14.6833	14.2926	12.8181	13.9604	13.8732	13.4357	14.9357	NA	0.0124727	0.98398	-0.0119144		-0.0360162	Q96GS4	11	BLOC-1-related complex subunit 6	BORCS6
10.3499	16.6696	15.7974	16.3797	17.7099	16.4214	15.8621	16.2793	12.8895	17.1581	17.5773	13.7228	16.4605	15.8358	17.1748	15.2391	15.8841	14.9395	16.8097	NA	0.394125	0.607136	-0.706953		-0.856694	A0A0B4J1R7;Q96B45	5	BORCS7-ASMT readthrough (NMD candidate);BLOC-1-related complex subunit 7	BORCS7-ASMT
15.3188	16.3912	18.2066	17.1848	17.2004	16.0615	14.1617	16.5329	17.3868	14.8751	14.7142	16.9531	16.0551	16.9763	16.499	16.6021	16.0481	16.2689	17.1287	present in the syncytiotrophoblast layer of the placental villi at the feto-maternal interface (at protein level). {ECO:0000269|PubMed:16246416, ECO:0000269|PubMed:3023066, ECO:0000269|PubMed:6313356}.;TISSUE SPECIFICITY: Expressed in red blood cells. Expressed in non-erythroid cells of the placenta	0.252405	0.732494	0.281789		0.595682	P07738	10	Bisphosphoglycerate mutase	BPGM
18.4958	16.6819	17.2253	18.6668	16.9016	17.6329	18.1831	16.059	18.1767	16.9779	16.9109	17.0446	16.6821	17.8029	17.1536	17.1759	18.1572	16.9585	18.7211	TISSUE SPECIFICITY: Expressed at high levels in liver and kidney and lower levels in heart, intestine and skeletal muscle. {ECO:0000269|PubMed:7759552}.	0.233984	0.746738	0.199653		0.558976	Q86WA6;Q86WA6-2	8	Valacyclovir hydrolase;Isoform 2 of Valacyclovir hydrolase	BPHL
17.4856	18.2113	15.4739	16.4982	18.9614	18.3631	19.5994	14.4954	19.999	16.6525	15.864	16.1095	16.4653	16.149	15.3141	17.7196	15.5957	16.8627	17.8476	NA;TISSUE SPECIFICITY: Restricted to cells of the myeloid series.	1.10214	0.224196	1.21836		1.86838	A0A2R8YDF1;P17213	14	Bactericidal permeability-increasing protein	BPI
18.2216	18.0324	17.7819	19.5965	16.3884	17.2264	18.2092	16.9317	17.8895	18.3631	19.2055	18.1013	17.9455	17.4027	18.3771	19.0015	17.1926	18.1366	18.7385	TISSUE SPECIFICITY: Highly expressed in kidney, liver, pancreas and heart. Detected at lower levels in brain, placenta, lung and skeletal muscle. {ECO:0000269|PubMed:10224133}.	0.619519	0.446381	-0.437835		-1.21722	O95861	24	3'(2'),5'-bisphosphate nucleotidase 1	BPNT1
15.7652	17.0519	16.1358	19.7136	16.4547	16.9214	16.8841	14.2924	18.0312	17.0965	17.3297	15.4466	16.4293	16.6024	16.601	16.7122	15.7003	16.7062	13.4099	NA	0.475726	0.544062	0.60218		0.993483	Q9NX62	9	Golgi-resident adenosine 3',5'-bisphosphate 3'-phosphatase	BPNT2
13.7948	15.0911	13.6895	15.3905	14.7402	15.1205	15.2645	14.4488	15.6033	15.3747	14.8222	14.5408	15.2627	15.0825	15.2355	14.2422	15.7843	13.8259	14.9939	NA;TISSUE SPECIFICITY: Ubiquitously expressed, with highest levels in testis. Present in kidney, liver and brain. In the brain, highest levels are found in motor cortex (at protein level). {ECO:0000269|PubMed:10662542, ECO:0000269|PubMed:10727212, ECO:0000269|PubMed:7621746, ECO:0000269|PubMed:9225734}.	0.169096	0.810781	-0.122778		-0.423149	A0A2R8Y7Q1;E7ETD6;E9PE19;Q12830;Q12830-2;Q12830-4	37	Nucleosome-remodeling factor subunit BPTF;Nucleosome-remodeling factor subunit BPTF (Fragment);Nucleosome-remodeling factor subunit BPTF;Nucleosome-remodeling factor subunit BPTF;Isoform 2 of Nucleosome-remodeling factor subunit BPTF;Isoform 4 of Nucleosome-remodeling factor subunit BPTF	BPTF
14.3354	15.9242	16.6975	17.3912	15.7652	15.3972	16.8212	16.3525	16.7318	16.1156	15.4133	15.5838	15.3062	15.584	14.8965	15.3737	15.5781	16.2829	14.6414	NA;TISSUE SPECIFICITY: Brain and testis.	1.24684	0.184471	0.679809		2.0451	A0A2R8Y8E0;A0A2U3TZI2;H7C560;P15056	8	Serine/threonine-protein kinase B-raf	BRAF
16.2055	15.8637	15.7371	16.3719	15.358	16.178	16.1618	14.3662	16.0542	12.3813	15.3941	13.3061	11.4482	15.3227	13.3429	14.6685	13.9352	14.0878	15.4195	NA;TISSUE SPECIFICITY: Expressed in breast epithelial cell lines. {ECO:0000269|PubMed:9497340}.	2.88691	0.0248069	1.88008	+	3.84509	J3KNN7;Q7Z569	8	BRCA1-associated protein	BRAP
15.0172	13.4416	13.0192	14.3574	14.0909	14.3063	14.0517	12.6041	13.7069	15.1089	14.8986	12.524	13.0197	15.4596	13.115	12.3544	13.871	13.246	13.6147	TISSUE SPECIFICITY: Ubiquitously expressed. {ECO:0000269|PubMed:16452482}.	0.107705	0.877802	0.122726		0.283311	Q6PJG6	10	BRCA1-associated ATM activator 1	BRAT1
12.5326	12.799	11.7636	11.5217	12.5663	12.2392	13.167	10.8311	13.953	12.807	12.8474	13.7531	12.9985	11.7762	13.3911	12.0922	12.182	12.5681	13.3199	TISSUE SPECIFICITY: Highest levels of expression in breast and thymus, with slightly lower levels in lung, ovary and spleen.	NaN	1	0		NaN	P51587	1	Breast cancer type 2 susceptibility protein	BRCA2
16.3544	16.8842	15.7861	16.9896	16.8867	16.3789	17.1068	15.7635	17.3242	16.3914	16.6806	13.9253	13.1507	16.2396	17.6548	16.2987	15.9659	16.0156	16.1804	TISSUE SPECIFICITY: Heart, brain, placenta, lung, liver, skeletal muscle, kidney and pancreas. Aberrantly expressed in the vast majority of breast tumors. {ECO:0000269|PubMed:16707425}.	0.885181	0.305343	0.757981		1.58998	P46736-2	15	Isoform 1 of Lys-63-specific deubiquitinase BRCC36	BRCC3
12.4956	13.9811	14.9937	11.806	16.7883	14.6412	12.7947	13.5298	20.5365	11.7629	14.368	13.7495	13.246	14.1121	12.2933	19.4161	14.644	12.8748	14.0275	TISSUE SPECIFICITY: Highly expressed in testis. {ECO:0000269|PubMed:10602503}.	0.214264	0.767392	0.569117		0.518825	O95696;O95696-2	6	Bromodomain-containing protein 1;Isoform 2 of Bromodomain-containing protein 1	BRD1
12.1495	12.8726	12.8719	12.9431	12.5132	12.0374	15.3832	12.8808	13.282	12.8973	13.3464	12.6166	13.1585	13.018	13.7788	11.9092	12.2686	11.5396	12.4216	NA	0.34724	0.647035	0.297182		0.774053	A0A0G2JK44;A0A140T9E9;H0Y6K2;P25440;P25440-2;P25440-3;P25440-4	13	Bromodomain-containing protein 2;Bromodomain-containing protein 2 (Fragment);Bromodomain-containing protein 2 (Fragment);Bromodomain-containing protein 2;Isoform 2 of Bromodomain-containing protein 2;Isoform 3 of Bromodomain-containing protein 2;Isoform 4 of Bromodomain-containing protein 2	BRD2
14.7696	16.1966	14.9302	16.7018	13.9752	15.2832	16.6937	12.6852	15.1454	15.6506	16.1041	15.9246	16.9536	15.3135	15.6784	13.0394	12.9618	12.3465	15.4086	TISSUE SPECIFICITY: Ubiquitous.	0.124957	0.857748	0.215336		0.323894	Q15059	7	Bromodomain-containing protein 3	BRD3
16.3554	16.7559	15.5908	17.9115	16.5583	17.0109	17.9979	16.4366	17.7468	16.5174	16.5009	15.536	16.1779	16.2409	16.2708	15.9693	16.4959	15.5419	16.9021	TISSUE SPECIFICITY: Ubiquitously expressed. {ECO:0000269|PubMed:12543779}.	1.56748	0.119373	0.714023	+	2.41887	O60885	29	Bromodomain-containing protein 4	BRD4
14.0308	14.1194	13.9846	14.8476	14.1081	14.6028	14.8798	13.8721	15.1344	15.6368	14.9153	12.0629	14.783	16.8761	13.2611	13.711	14.8465	13.7929	14.4865	NA	0.0297756	0.961983	-0.0394845		-0.0843843	Q9NPI1	16	Bromodomain-containing protein 7	BRD7
14.459	15.5377	14.6296	13.2044	14.0557	14.7246	16.0883	14.8979	16.358	14.4821	15.9691	12.592	12.3294	12.4979	10.5473	14.5327	14.4834	13.6498	14.1167	NA;TISSUE SPECIFICITY: Expressed in adipose tissue, brain, heart, kidney, liver, lung, pancreas, placenta and skeletal muscle. {ECO:0000269|PubMed:8611617}.	1.43196	0.140784	1.36388	+	2.2634	B5MCW3;H7C127;H7C179;Q9H0E9;Q9H0E9-2;Q9H0E9-4	11	Bromodomain-containing protein 8;Bromodomain-containing protein 8 (Fragment);Bromodomain-containing protein 8 (Fragment);Bromodomain-containing protein 8;Isoform 2 of Bromodomain-containing protein 8;Isoform 4 of Bromodomain-containing protein 8	BRD8
13.6522	12.0784	12.8891	13.007	13.5577	14.2238	13.4723	12.6156	13.1483	13.8303	13.4935	13.6197	13.1388	13.4397	13.2169	10.89	12.8314	10.8094	13.8712	NA	0.268983	0.717244	0.268621		0.628091	C9JBY0;Q9H8M2;Q9H8M2-1;Q9H8M2-3;Q9H8M2-4;Q9H8M2-6	3	Bromodomain-containing protein 9 (Fragment);Bromodomain-containing protein 9;Isoform 5 of Bromodomain-containing protein 9;Isoform 3 of Bromodomain-containing protein 9;Isoform 4 of Bromodomain-containing protein 9;Isoform 6 of Bromodomain-containing protein 9	BRD9
11.8862	16.2101	18.035	19.4211	18.1051	19.011	18.2405	17.5037	19.1772	11.6539	12.5078	14.5054	12.7036	12.3815	12.5702	18.1662	18.2492	18.5061	19.566	NA;TISSUE SPECIFICITY: Most abundantly expressed in brain, liver and kidney (PubMed:11860200). Overexpressed in leukemia and lymphoma cell lines, as well as in various carcinomas (PubMed:17943721). {ECO:0000269|PubMed:11860200, ECO:0000269|PubMed:17943721}.	1.12243	0.217316	2.429		1.89353	A0A5F9ZHY7;Q8WY22	1	BRI3-binding protein	BRI3BP
17.6198	18.9147	16.2614	18.8194	16.9742	18.0372	17.4313	15.5998	18.7768	17.3277	16.7195	16.2503	17.2294	17.1914	17.1527	17.4642	16.7561	16.4451	17.5502	NA	0.815154	0.338129	0.595173		1.49574	Q8TDN6	16	Ribosome biogenesis protein BRX1 homolog	BRIX1
18.2936	17.7267	17.1469	17.8938	18.1689	17.721	18.8514	17.8568	19.4166	17.1864	16.8519	17.3507	17.5198	18.0387	16.8472	16.0514	16.2109	16.233	16.9397	NA	3.02456	0.0232216	1.19653	+	3.99122	Q8WUW1;Q8WUW1-2	7	Protein BRICK1;Isoform 2 of Protein BRICK1	BRK1
14.6293	15.2453	14.7318	12.7358	14.3834	13.4276	16.2733	13.3807	16.3824	15.9033	12.7106	13.4807	14.0983	15.2939	12.6865	14.5653	14.1912	14.4347	12.6934	NA;TISSUE SPECIFICITY: Expression levels are higher in term placentas than in early placentas. Low levels of expression observed in normal pregnancies and in molar pregnancies. {ECO:0000269|PubMed:12414911}.	0.508031	0.522396	0.570837		1.04549	E9PJF5;G5E9I4;H0YCF7;Q9HCU9	3	Breast cancer metastasis-suppressor 1 (Fragment);Breast cancer metastasis suppressor 1, isoform CRA_c;Breast cancer metastasis-suppressor 1 (Fragment);Breast cancer metastasis-suppressor 1	BRMS1
12.1797	13.8041	15.8335	12.6324	15.9378	15.2778	13.7197	15.152	14.3877	13.7587	11.6364	12.3599	12.8757	11.2967	13.5002	14.7902	14.9658	15.2775	11.4519	NA	0.986762	0.263225	1.13368		1.72264	H0YHD0;Q5PSV4;Q5PSV4-2	1	Breast cancer metastasis-suppressor 1-like protein (Fragment);Breast cancer metastasis-suppressor 1-like protein;Isoform 2 of Breast cancer metastasis-suppressor 1-like protein	BRMS1L
18.0135	18.6654	17.7764	17.4022	17.7583	17.3931	18.7365	17.2743	18.6727	18.5077	18.4126	17.9985	17.8435	18.1712	18.3388	19.1721	17.1694	17.5672	17.2332	NA	0.103136	0.88282	-0.0756185		-0.272377	Q5VW32	17	BRO1 domain-containing protein BROX	BROX
11.121	14.7757	14.1527	13.5362	13.8329	13.5562	14.964	12.4596	15.4129	13.8928	18.6076	11.172	10.9745	12.6821	12.7283	12.8354	13.0388	12.9778	11.7745	NA;TISSUE SPECIFICITY: High levels in testis. {ECO:0000269|PubMed:7906940}.	0.378469	0.620003	0.688394		0.829455	A0A5F9ZH11;A0A5F9ZHW9;P55201;P55201-2;P55201-3;P55201-4	5	Peregrin (Fragment);Peregrin;Peregrin;Isoform 2 of Peregrin;Isoform 3 of Peregrin;Isoform 4 of Peregrin	BRPF1
11.2881	10.9225	10.1065	13.4086	11.1335	10.2946	12.8086	11.8543	12.4992	12.8989	11.3054	12.7929	9.62367	10.4319	10.2129	8.2882	10.6194	10.2827	11.7077	NA	0.680988	0.4092	0.774285		1.30749	Q9ULD4;Q9ULD4-2;Q9ULD4-3	3	Bromodomain and PHD finger-containing protein 3;Isoform 2 of Bromodomain and PHD finger-containing protein 3;Isoform 3 of Bromodomain and PHD finger-containing protein 3	BRPF3
11.0327	11.5578	12.2558	11.8773	13.0628	12.9916	13.2612	11.8617	12.3153	11.9938	12.8606	11.7157	11.6621	12.4902	11.8915	10.621	10.0926	10.8701	13.1293	NA;TISSUE SPECIFICITY: Expressed in motor neurons in the spinal cord and cortical neurons in the frontal lobe (at protein level). Highly expressed in brain, testis and adipose tissue. {ECO:0000269|PubMed:11479539, ECO:0000269|PubMed:18458148, ECO:0000269|PubMed:18585921}.	NaN	1	0		NaN	E9PIU3;E9PJK0;E9PSB5;H7BXM1;J3KQ12;Q96G97-4	2	Seipin (Fragment);Seipin (Fragment);Seipin (Fragment);Seipin;HCG2020143, isoform CRA_b;Isoform 3 of Seipin	BSCL2
13.781	14.5288	13.9769	14.2312	14.433	14.2126	13.7459	13.4139	13.6506	14.544	14.8243	14.3286	14.2081	14.3444	14.0624	14.2012	13.3802	13.8967	13.9769	NA	0.489456	0.53445	-0.179578		-1.01573	Q9NW68;Q9NW68-2	9	BSD domain-containing protein 1;Isoform 2 of BSD domain-containing protein 1	BSDC1
20.2181	20.24	19.3096	19.3594	20.4957	20.3768	19.8419	19.9341	20.0778	18.7344	17.903	19.3443	19.028	18.5261	18.5922	19.9815	19.7467	19.6301	19.3207	TISSUE SPECIFICITY: [Isoform 1]: Retina-specific (PubMed:25957687). Expressed in retinal cone photoreceptors (at protein level) (PubMed:25957687). {ECO:0000269|PubMed:25957687}.;TISSUE SPECIFICITY: [Isoform 2]: Expressed in erythrocytes (at protein level) (PubMed:26195724, PubMed:28409866). Highly expressed in melanoma cell lines (at protein level) (PubMed:11992541). Highly expressed in the heart…	2.62744	0.0319039	0.903026	+	3.56988	P35613;P35613-2	13	Basigin;Isoform 2 of Basigin	BSG
16.4135	16.8236	16.2175	16.8038	12.2779	17.1184	17.381	14.5707	17.5501	15.9848	16.3388	13.5162	14.316	16.536	15.0469	16.7149	15.5398	15.1119	15.7762	NA	0.48847	0.534523	0.640385		1.01413	Q5W0U4	10	B box and SPRY domain-containing protein	BSPRY
16.3359	15.2194	14.6529	15.4214	18.5683	15.8974	16.9874	12.8111	18.1743	13.7916	17.0881	12.0188	15.6588	14.9334	13.9321	13.7009	15.188	14.1702	15.323	NA;TISSUE SPECIFICITY: Widely expressed.	1.18215	0.202059	1.42706		1.96684	A6NC48;Q10588	3	ADP-ribosyl cyclase/cyclic ADP-ribose hydrolase 2	BST1
18.918	19.8411	18.8031	20.0242	19.5291	19.8174	18.4191	19.4331	20.2193	18.1116	18.422	19.5652	18.0501	19.978	19.0252	17.743	17.1667	18.4616	18.3162	TISSUE SPECIFICITY: Predominantly expressed in liver, lung, heart and placenta. Lower levels in pancreas, kidney, skeletal muscle and brain. Overexpressed in multiple myeloma cells. Highly expressed during B-cell development, from pro-B precursors to plasma cells. Highly expressed on T-cells, monocytes, NK cells and dendritic cells (at protein level). {ECO:0000269|PubMed:10329429, ECO:0000269|Pub…	1.93284	0.0722421	0.961	+	2.82507	Q10589;Q10589-2	4	Bone marrow stromal antigen 2;Isoform 2 of Bone marrow stromal antigen 2	BST2
14.7173	16.0583	14.7876	16.132	16.0754	16.2793	16.4014	15.0854	17.6829	15.6598	15.6458	14.3931	15.1487	14.5946	13.6558	15.4887	15.929	15.0625	15.3029	NA	1.37861	0.15218	0.825181	+	2.20126	A0A0A0MTH9;O14981	24	TATA-binding protein-associated factor 172	BTAF1
15.4771	15.6616	14.0721	15.7601	15.1485	14.5035	12.433	13.3521	12.9024	15.388	11.8463	14.4484	13.5351	12.359	15.1202	13.4373	14.5978	13.0232	14.7166	NA	0.436325	0.574706	0.520615		0.928464	Q9BX70	2	BTB/POZ domain-containing protein 2	BTBD2
12.6556	12.3973	12.4315	13.2907	12.8103	11.5414	13.6321	12.7352	13.8036	13.5551	11.7961	13.0483	12.565	11.0574	12.7094	12.4151	11.5725	12.7969	17.9769	TISSUE SPECIFICITY: Synthesized in several tissues and tumor cells. Predominantly expressed in pancreas and small intestine. {ECO:0000269|PubMed:8919026}.	NaN	1	0		NaN	P35070	1	Probetacellulin	BTC
15.4908	16.0374	16.8255	16.5356	15.463	15.1317	15.4791	15.6578	15.4817	16.2084	16.2922	16.106	16.1572	6.089	15.7799	15.8355	15.9358	15.9735	16.2094	NA	0.29759	0.691071	0.730481		0.68273	P43251;P43251-2;P43251-3;P43251-4	6	Biotinidase;Isoform 2 of Biotinidase;Isoform 3 of Biotinidase;Isoform 4 of Biotinidase	BTD
14.7894	16.7972	16.6408	17.172	14.628	16.4068	17.3972	16.6572	17.0898	17.5174	15.9857	17.0689	16.8985	16.8103	16.7584	16.9142	16.8272	16.2788	16.4175	NA	0.483553	0.538335	-0.350092		-1.00619	P20290	14	Transcription factor BTF3	BTF3
18.8951	18.7724	17.6041	19.642	19.0682	18.6926	19.9293	18.4309	19.6487	18.8509	17.96	18.6076	18.361	17.4724	18.7467	18.0035	17.9016	17.9084	18.4715	NA	1.83779	0.0818169	0.736467	+	2.72085	Q96K17	11	Transcription factor BTF3 homolog 4	BTF3L4
13.7905	14.9029	15.3124	14.3695	15.8143	15.4659	14.764	15.6215	15.476	14.4907	15.9688	13.577	15.9612	14.3798	14.0511	15.4195	12.8399	15.7066	14.6526	TISSUE SPECIFICITY: Predominantly expressed in B-lymphocytes.	0.396725	0.606192	0.352718		0.861184	Q06187;Q06187-2	11	Tyrosine-protein kinase BTK;Isoform BTK-C of Tyrosine-protein kinase BTK	BTK
11.8616	11.751	12.8696	14.5536	12.2338	12.8137	13.9874	10.8936	12.2338	12.8687	12.0093	13.297	12.8499	12.1066	13.9395	12.2498	11.2356	12.0647	11.6633	NA	NaN	1	0		NaN	Q7Z6A9;Q7Z6A9-2	2	B- and T-lymphocyte attenuator;Isoform 2 of B- and T-lymphocyte attenuator	BTLA
13.8092	13.194	12.5022	12.9708	13.9446	13.1293	15.2375	12.91	16.552	12.496	11.8154	12.4074	11.9671	13.1687	14.1424	13.6755	14.0243	13.4586	10.5706	TISSUE SPECIFICITY: Highly expressed in brain, bone marrow, small intestine, muscle, spleen and pancreas. Moderate expression was seen in lung, liver and kidney. {ECO:0000269|PubMed:9149941}.	1.08598	0.228652	1.03293		1.84825	Q7KYR7;Q7KYR7-5	6	Butyrophilin subfamily 2 member A1;Isoform 5 of Butyrophilin subfamily 2 member A1	BTN2A1
13.9036	13.6549	15.2806	16.1083	16.4904	16.6314	17.5705	15.7323	16.6643	15.6266	15.9653	16.1315	13.4963	16.5154	12.9604	15.9277	14.0663	15.3251	15.7529	TISSUE SPECIFICITY: Detected in peripheral blood mononuclear cells and in T-cells (at protein level). Detected in spleen and lymphocytes. {ECO:0000269|PubMed:20610803}.	0.507349	0.522619	0.605082		1.04441	O00478-2	6	Isoform 2 of Butyrophilin subfamily 3 member A3	BTN3A3
19.1406	20.2536	19.6394	23.3398	20.1998	19.7688	19.9486	19.851	20.2282	19.5359	18.9957	19.2034	19.3056	19.3445	19.1918	19.5544	20.4594	19.2883	21.1127	NA	0.824704	0.333837	0.664161		1.50874	J3QT28;O43684;O43684-2	13	Mitotic checkpoint protein BUB3 (Fragment);Mitotic checkpoint protein BUB3;Isoform 2 of Mitotic checkpoint protein BUB3	BUB3
14.2976	14.5395	12.1013	14.1691	13.1597	14.8355	21.7306	12.6295	22.009	16.9741	13.3598	12.1522	12.5047	11.9928	14.514	13.9478	14.2144	14.0544	13.455	NA	0.747409	0.371692	1.77994		1.40206	Q9BRD0;Q9BRD0-2	7	BUD13 homolog;Isoform 2 of BUD13 homolog	BUD13
16.8172	17.605	13.9272	17.0629	12.0921	17.0359	17.0751	14.5248	15.5083	16.317	18.0514	12.9618	16.3339	16.6372	15.1374	16.694	16.886	15.123	16.4743	TISSUE SPECIFICITY: Widely expressed, with high levels in heart, skeletal muscle and kidney. Detected at high levels in bronchial brushings and in normal lung (at protein level). In fetal lung tissue, expressed in the developing bronchial lumen lining cells (at protein level). Tends to be down-regulated in lungs affected by inflammatory diseases or neoplasia (at protein level). Expressed in immun…	0.173136	0.806918	-0.322881		-0.431933	O43709	3	Probable 18S rRNA (guanine-N(7))-methyltransferase	BUD23
16.0316	17.0155	15.5503	18.4964	16.1658	16.6264	17.5963	16.7169	17.9087	16.5756	13.9577	15.6637	15.7787	15.3567	15.7457	15.6055	16.3453	15.5342	15.6198	TISSUE SPECIFICITY: Detected in epithelial and stromal cells in benign prostate hyperplasia tissue (at protein level). {ECO:0000269|PubMed:25091737}.	2.44674	0.03913	1.28258	+	3.37788	P41223	15	Protein BUD31 homolog	BUD31
16.3667	17.5769	16.1307	17.5976	16.7347	17.6408	17.4738	16.4519	17.2812	16.4599	15.2388	15.3671	16.1018	16.5008	17.4629	17.0317	17.5669	16.0173	16.6309	TISSUE SPECIFICITY: Found in the placenta from the sixth week of pregnancy. Was localized in the cytoplasm of the syncytiotrophoblast in the chorionic villi and in endometrial decidual cells at the uteroplacental interface. After week 10, the level decreased and then disappeared from placental villi.	1.05976	0.236394	0.590436		1.8154	Q13895	16	Bystin	BYSL
18.3626	19.3083	17.9044	20.361	18.3899	19.321	18.7569	18.2216	18.4187	18.7941	18.5339	17.7642	18.3321	18.0672	18.0318	18.8313	18.609	18.443	19.7116	NA	0.420661	0.586632	0.270911		0.902093	Q7L1Q6;Q7L1Q6-3;Q7L1Q6-4	23	Basic leucine zipper and W2 domain-containing protein 1;Isoform 3 of Basic leucine zipper and W2 domain-containing protein 1;Isoform 4 of Basic leucine zipper and W2 domain-containing protein 1	BZW1
17.5539	18.5487	17.6231	19.6212	17.8505	18.2709	19.0742	17.5489	18.4359	17.0211	17.1214	17.2337	17.2304	17.3342	17.3802	17.9687	18.0954	17.6525	18.8675	NA	1.47842	0.134311	0.690317	+	2.31707	E7ETZ4;Q9Y6E2	23	Basic leucine zipper and W2 domain-containing protein 2 (Fragment);Basic leucine zipper and W2 domain-containing protein 2	BZW2
17.3596	16.8555	18.1294	12.1553	16.986	17.3193	18.984	17.558	19.2827	16.4166	17.5096	16.9325	15.9649	15.6276	16.6699	18.5025	17.0097	17.8819	11.7569	NA	0.383694	0.615153	0.753853		0.838585	A0A087WT99	4	Ester hydrolase C11orf54	C11orf54
18.1074	17.1047	17.3793	17.4828	18.2645	17.3999	18.3127	18.2846	17.6887	17.7582	17.1662	16.7977	17.1842	16.46	17.9099	16.6224	16.6281	16.1858	17.5041	NA	2.21629	0.0513345	0.758855	+	3.13169	Q9H3H3;Q9H3H3-1;Q9H3H3-3	9	UPF0696 protein C11orf68;Isoform 1 of UPF0696 protein C11orf68;Isoform 3 of UPF0696 protein C11orf68	C11orf68
17.1093	16.5256	15.0105	16.2689	17.21	16.5742	18.4186	16.2911	18.3409	17.0667	17.136	16.9941	17.0417	16.4888	17.3654	15.2083	14.5253	14.6596	14.5055	NA	0.777134	0.358342	0.761876		1.44349	Q7Z7L8	4	Uncharacterized protein C11orf96	C11orf96
16.5884	18.1005	14.156	15.4785	14.5463	17.2117	15.91	16.489	14.8467	15.78	15.6967	15.1914	13.583	14.4527	12.4536	16.3698	16.8882	14.7483	17.0019	NA	0.552556	0.48917	0.708676		1.11543	E9PRG8	3	Uncharacterized protein C11orf98	C11orf98
12.0932	13.0122	12.5524	14.3289	12.0275	14.2114	14.6911	11.6704	13.185	13.1936	11.139	13.4579	13.7411	13.581	13.8759	13.4715	12.9447	12.2454	13.0899	NA	0.00916274	0.987722	0.0118042		0.0265561	Q8N999	5	Uncharacterized protein C12orf29	C12orf29
10.2356	13.7926	14.6329	13.7052	14.0122	15.5295	13.0053	14.6002	13.8251	14.0703	15.3587	13.5829	14.2021	13.3371	14.3209	14.7631	13.7133	13.4771	8.58924	NA	0.077749	0.911395	0.162809		0.210101	Q9NQ89	5	Protein C12orf4	C12orf4
14.3392	15.8556	13.996	16.0313	14.8983	16.0002	15.5561	14.1127	15.7242	14.8036	13.1704	13.3093	13.1371	14.7425	14.9407	15.6886	16.4612	14.6373	15.4182	NA	0.588734	0.464826	0.537293		1.1709	F5H7W8;Q96C57	3	Chromosome 12 open reading frame 43;Protein CUSTOS	C12orf43
10.3693	13.271	11.3518	14.2832	12.4654	11.6067	14.4767	13.7793	12.6261	12.2152	12.1473	14.5508	11.6593	11.086	12.7403	11.0318	12.1735	10.5962	12.3009	NA	NaN	1	0		NaN	A0A087WT30;Q8N5I9	1	Uncharacterized protein C12orf45	C12orf45
12.6022	10.4881	14.7333	12.2237	12.8006	10.5418	13.141	14.8618	13.392	13.3619	12.068	13.3868	12.695	14.051	13.3395	12.0588	14.244	14.3351	13.4668	NA;TISSUE SPECIFICITY: Ubiquitously expressed, with higher expression in lung and fetal brain. {ECO:0000269|PubMed:23453666}.	NaN	1	0		NaN	Q99622;U3KQ07	2	Protein C10	C12orf57
14.1917	15.3494	13.9348	12.7156	16.1559	16.4447	15.0422	15.442	12.7867	12.2281	14.4783	12.6572	14.7232	14.8267	14.5857	17.652	15.1873	14.4142	12.0391	NA	0.2365	0.743706	0.394503		0.564034	Q9NWQ9	1	Uncharacterized protein C14orf119	C14orf119
15.0576	15.3429	14.325	16.024	14.7685	15.3007	16.5735	15.7214	15.5529	15.4019	14.7087	16.0299	14.1664	14.564	15.2135	14.7701	14.5123	14.9373	15.4126	NA	0.863638	0.315587	0.435711		1.56125	A0A0A6YYH1;Q7Z6K5-2	9	Protein C15orf38-AP3S2;Isoform C15orf38-AP3S2 of Arpin	C15orf38-AP3S2
15.7906	15.9671	15.6933	13.5943	17.0356	15.2558	17.5497	15.922	17.8981	12.3181	12.7974	12.3108	13.6245	13.5723	16.4833	16.1364	15.1751	14.3589	19.3323	NA	0.993096	0.260714	1.46762		1.73076	H3BSG0;Q9BSU1	3	UPF0183 protein C16orf70 (Fragment);UPF0183 protein C16orf70	C16orf70
16.0423	17.3516	15.9803	18.9493	15.8271	16.385	17.8038	16.2874	17.2705	15.8862	15.5934	16.1415	15.6262	14.7432	17.309	15.3029	15.9431	15.8741	18.8695	NA;TISSUE SPECIFICITY: Highly expressed in testis and also expressed in fetal testis.	0.795119	0.347975	0.748569		1.46831	J9JIC5;Q9HAS0	11	Protein Njmu-R1	C17orf75
14.5567	15.2047	11.621	12.4092	12.2802	10.685	12.2393	11.645	13.0716	11.5194	12.3816	13.0325	12.4131	12.2629	13.2606	11.0462	12.6394	12.8306	12.4209	NA	NaN	1	0		NaN	I3L072;Q9BSJ5;Q9BSJ5-2;Q9BSJ5-3	2	Uncharacterized protein C17orf80;Uncharacterized protein C17orf80;Isoform 2 of Uncharacterized protein C17orf80;Isoform 3 of Uncharacterized protein C17orf80	C17orf80
14.9212	15.4362	14.7031	14.5436	13.3596	13.8836	14.5757	14.8793	14.2605	15.5265	15.4271	12.3391	13.0285	15.7177	12.8557	14.206	14.0232	11.8166	14.3701	NA	0.574672	0.475187	0.575897		1.14948	Q96B23-2	5	Isoform 2 of Uncharacterized protein C18orf25	C18orf25
17.1544	17.78	17.2326	17.493	18.3405	17.9722	17.4836	16.8565	17.9998	17.3239	17.6961	16.3355	15.7467	17.5577	18.8124	17.0148	17.1624	17.9666	19.3187	NA	0.0946831	0.894105	0.0968046		0.251934	Q8TCD1	4	UPF0729 protein C18orf32	C18orf32
16.2846	17.345	17.0411	17.8329	16.6425	17.2024	17.5856	17.2417	17.597	16.2471	17.2472	17.1012	17.5644	18.6536	16.8591	16.6845	17.0196	16.5972	17.0636	NA	0.135478	0.847508	0.0932102		0.348128	Q9UFG5	6	UPF0449 protein C19orf25	C19orf25
11.8259	14.4263	12.1367	12.8046	11.9	13.6115	14.8242	13.8597	14.8938	13.6677	12.7882	13.0497	12.7645	14.0033	14.141	13.8283	15.0039	13.1969	12.4188	NA	NaN	1	0		NaN	Q8N9M1;Q8N9M1-2;Q8N9M1-3	2	Uncharacterized protein C19orf47;Isoform 2 of Uncharacterized protein C19orf47;Isoform 3 of Uncharacterized protein C19orf47	C19orf47
12.9866	12.2039	14.4005	13.2886	11.9616	12.4262	16.2199	15.7677	14.0005	13.5375	13.9999	13.9677	12.8952	13.5055	13.7744	13.449	12.9826	11.8832	13.8154	NA	0.251437	0.7327	0.314006		0.593772	Q9UNZ5	2	Leydig cell tumor 10 kDa protein homolog	C19orf53
14.4628	16.8739	15.8858	17.6668	16.3702	17.1141	17.0356	16.7103	17.441	14.4107	12.9349	16.1927	16.251	12.101	11.9583	16.8944	17.3394	16.1369	16.3356	lung, liver and kidney. Expressed at low levels in skeletal muscle, appendix, heart, lung and colon. {ECO:0000269|PubMed:10362552}.;NA;TISSUE SPECIFICITY: Ubiquitous. Expressed at very high levels in the hippocampus, medulla oblongata, mammary gland, thyroid and salivary gland. Expressed at high levels in the fetal	1.28674	0.173341	1.56234		2.09282	J3KPZ4;Q13901	2	Nuclear nucleic acid-binding protein C1D	C1D
15.2197	16.5546	14.2171	13.2358	15.3833	15.8177	16.2459	13.7863	17.6343	14.685	15.2604	18.0734	14.2919	13.5529	13.3074	15.5857	14.8783	15.2501	16.7362	TISSUE SPECIFICITY: Widely expressed. Highly expressed in kidney, heart, placenta and liver. {ECO:0000269|PubMed:11677243}.	0.105936	0.879765	0.181752		0.279088	Q9NS00	10	Glycoprotein-N-acetylgalactosamine 3-beta-galactosyltransferase 1	C1GALT1
13.7744	15.6054	11.9422	15.5468	12.505	13.6573	15.841	14.1221	15.2636	12.8358	12.8056	12.7695	10.8757	9.98504	13.4552	13.018	14.8509	11.9597	14.7305	NA	1.42367	0.142487	1.52228	+	2.25379	Q6ZSJ8	4	Uncharacterized protein C1orf122	C1orf122
15.24	16.558	13.6501	14.873	14.8876	14.4881	15.5278	14.249	14.3239	14.7192	13.7621	14.1873	13.8346	13.8696	14.1452	13.043	13.82	13.867	14.0148	NA	2.20301	0.052	0.940111	+	3.11743	Q8IYL3	3	UPF0688 protein C1orf174	C1orf174
16.0661	16.2194	14.1912	15.0074	15.1052	15.4265	16.6188	16.8468	16.2424	15.5196	14.9137	15.6827	15.3843	16.7148	15.3175	13.3019	15.0355	13.7451	14.9999	NA	0.909812	0.294809	0.68558		1.62256	Q9H425;Q9H425-3	9	Uncharacterized protein C1orf198;Isoform 3 of Uncharacterized protein C1orf198	C1orf198
11.2216	12.55	8.6888	12.2404	12.3692	11.6819	13.0036	10.8435	13.2049	12.2205	12.4089	11.7994	10.9303	12.0399	11.0589	8.415	8.69299	11.3114	11.7714	NA;TISSUE SPECIFICITY: Expressed in spleen, prostate, testis and uterus. {ECO:0000269|PubMed:11318611}.	0.526621	0.508999	0.691105		1.07493	A0A3B3ITU3;Q9H246	1	Uncharacterized protein C1orf21	C1orf21
10.7452	11.7063	12.2361	14.0221	13.5358	11.4078	13.2272	9.68666	14.1835	12.6654	12.6716	13.0074	13.2893	12.6362	11.9017	13.9138	12.2238	13.1329	12.44	NA	0.43	0.580386	-0.482601		-0.917853	Q8IVY1	1	Type III endosome membrane protein TEMP	C1orf210
14.2285	14.1264	14.1952	12.953	14.7762	14.5123	14.8386	14.3393	14.4136	16.2852	14.6673	15.7969	15.6625	15.0718	13.4565	13.7323	14.558	13.8887	18.4713	NA	0.963271	0.272053	-0.894246		-1.69235	Q9BV19	7	Uncharacterized protein C1orf50	C1orf50
15.0695	14.3552	11.1067	13.4719	11.8012	11.8508	13.333	11.0829	13.24	12.2735	13.5073	11.8343	12.0243	12.4672	12.4896	12.5686	13.5226	10.0025	12.2052	TISSUE SPECIFICITY: Expressed in all tissues tested including heart, placenta, liver, skeletal muscle, kidney and pancreas. Weak expression in brain and lung. {ECO:0000269|PubMed:11891061}.	NaN	1	0		NaN	Q8N6N3;Q8N6N3-2;Q8N6N3-3	1	UPF0690 protein C1orf52;Isoform 2 of UPF0690 protein C1orf52;Isoform 3 of UPF0690 protein C1orf52	C1orf52
18.9238	15.9323	18.1422	16.3256	20.141	17.6568	18.7974	19.3183	19.1615	18.3196	18.0764	19.2097	18.8476	17.5186	18.5432	17.741	18.0203	17.8601	16.917	NA	0.125789	0.857735	0.161171		0.325825	P02745;X6RLJ0	5	Complement C1q subcomponent subunit A;Complement C1q subcomponent subunit A (Fragment)	C1QA
19.2639	16.8906	18.2546	11.4619	18.2439	18.243	18.9477	18.9665	17.4866	19.0544	18.7476	20.3558	19.7979	19.0707	19.1415	18.501	18.7458	18.3879	22.9289	NA	1.38649	0.150444	-1.9444	+	-2.21047	A0A0A0MSV6;D6R934;P02746	8	Complement C1q subcomponent subunit B (Fragment);Complement C1q subcomponent subunit B;Complement C1q subcomponent subunit B	C1QB
20.3734	18.3566	20.1749	14.7991	17.7612	17.7952	16.2291	21.4835	15.9661	19.9471	19.747	21.3474	20.4289	19.4084	18.9353	18.1284	19.4621	19.1702	12.1863	NA	0.309294	0.680339	-0.771763		-0.704641	P02747	4	Complement C1q subcomponent subunit C	C1QC
12.4374	13.4231	11.0855	12.7234	12.8977	12.8423	12.6413	13.1284	15.0023	13.7331	12.2956	13.4	12.1009	11.4518	15.0203	11.4328	11.2342	10.4186	13.6732	NA;TISSUE SPECIFICITY: Expressed in adipose tissue. {ECO:0000269|PubMed:31439668}.	NaN	1	0		NaN	A0A499FIM1;Q9BXJ5	3	C1q and tumor necrosis factor related protein 2;Complement C1q tumor necrosis factor-related protein 2	C1QTNF2
17.9247	16.8846	13.9744	11.6019	13.0909	13.3208	13.8268	13.7336	11.4871	13.7337	13.3172	12.77	16.1886	16.7115	12.4297	11.5246	12.417	12.5822	13.0576	TISSUE SPECIFICITY: Expressed in colon and small intestine. {ECO:0000269|PubMed:14654242}.	0.243455	0.739397	0.509534		0.577943	Q9BXJ4-3	3	Isoform 3 of Complement C1q tumor necrosis factor-related protein 3	C1QTNF3
18.8051	16.6761	18.3785	17.6407	19.2666	17.6854	18.4205	18.6013	18.086	19.0707	17.7301	18.2886	18.6577	18.12	18.255	17.1767	17.5616	17.8804	16.9498	NA	0.270428	0.716115	0.204297		0.63089	A0A3B3ISR2;B4DPQ0;P00736	28	Complement C1r subcomponent	C1R
11.6798	13.1288	15.8851	12.5517	11.5613	12.4609	14.1954	14.6853	12.7618	14.6013	15.7145	15.6932	15.752	14.4494	15.6937	15.4654	10.8843	14.0279	12.7473	NA;TISSUE SPECIFICITY: Highly expressed in placenta, liver, kidney, pancreas, moderately in lung, spleen, prostate, ovary, colon, and PBL, and weakly in heart, skeletal muscle, thymus, testis, and small intestine. Expressed in PC-3 (prostate adenocarcinoma) and SK-OV-3 (ovary adenocarcinoma) cells, but not in LoVo and HT-29 (colon adenocarcinoma), SMMC7721 (hepatocellular carcinoma), CaoV-3 (ovar…	1.07667	0.231018	-1.2907		-1.83662	H0YFL7;Q9NZP8	1	Complement C1r subcomponent-like protein (Fragment);Complement C1r subcomponent-like protein	C1RL
17.5918	15.9754	17.2014	17.0105	18.4717	16.8397	18.0377	17.8444	17.5577	17.8962	16.7322	17.5595	17.7271	17.3201	17.692	16.4903	16.5291	16.6524	16.0396	NA	0.500555	0.527256	0.328408		1.03356	A0A087X232	23	Complement C1s subcomponent	C1S
13.203	10.2774	13.8813	13.1436	14.4282	14.6064	13.8086	15.4788	14.7539	14.4315	12.5629	12.7195	12.0097	12.4825	13.0779	14.7121	14.2144	14.579	13.2267	NA	0.239935	0.741222	0.329637		0.570917	A0A0G2JL69	4	Complement C2	C2
15.2147	12.102	13.9054	16.7083	17.4801	16.125	16.851	15.8441	17.435	10.9264	15.1836	14.6643	10.5179	14.543	14.3208	12.8373	12.1602	12.9235	14.8941	NA	2.1684	0.0537028	2.4435	+	3.08024	H7BYU9;Q9GZN8;Q9GZN8-2	6	UPF0687 protein C20orf27 (Fragment);UPF0687 protein C20orf27;Isoform 2 of UPF0687 protein C20orf27	C20orf27
14.3534	14.1145	12.6198	12.2106	12.9845	13.1781	14.8511	12.8894	14.6073	13.9836	11.9276	13.2869	12.7429	12.9021	12.5629	12.205	12.1966	13.7276	16.2983	NA	0.290473	0.697255	0.350959		0.669283	O14523;O14523-2	8	Phospholipid transfer protein C2CD2L;Isoform 2 of Phospholipid transfer protein C2CD2L	C2CD2L
16.2903	16.8219	15.8442	17.6597	16.1467	16.7845	17.3875	15.511	17.5193	16.3156	16.2614	14.8759	15.6671	16.4971	15.3895	16.2189	16.3195	16.0281	16.2738	NA	1.45226	0.137533	0.678103	+	2.2869	Q86YS7;Q86YS7-3	19	C2 domain-containing protein 5;Isoform 3 of C2 domain-containing protein 5	C2CD5
8.49795	8.02042	10.2984	13.9232	11.9623	11.0873	12.5864	11.7939	12.7442	12.5494	12.0883	12.8515	12.5042	12.7377	14.0406	7.80758	10.2928	10.2576	10.8198	NA	NaN	1	0		NaN	C9JJF4;C9JZF3;Q9NWW7	1	Uncharacterized protein C2orf42 (Fragment);Uncharacterized protein C2orf42 (Fragment);Uncharacterized protein C2orf42	C2orf42
16.5639	16.7268	15.5641	16.5736	15.6514	16.206	17.4292	16.2149	17.8863	16.0046	16.2114	12.2223	13.3069	15.3344	13.982	16.26	15.6554	14.5242	16.1553	NA	2.07318	0.0604239	1.56946	+	2.97755	C9J4K0;Q9BVC5;Q9BVC5-2	6	Ashwin;Ashwin;Isoform 2 of Ashwin	C2orf49
11.7139	12.8247	12.2417	13.2516	12.1097	12.8821	12.049	12.0695	12.7701	11.85	12.0699	12.6257	11.6071	12.3801	13.566	12.3306	12.7283	11.1641	11.43	NA	0.423148	0.584457	0.25953		0.906301	Q8N8R5	5	UPF0565 protein C2orf69	C2orf69
14.7137	16.1454	15.2681	15.1307	11.7315	12.7007	14.5121	11.9326	15.9362	12.2492	11.9576	13.0344	12.8892	12.4349	13.5558	13.8986	13.2766	14.8842	15.7629	NA	NaN	1	0		NaN	A6NCS6	4	Uncharacterized protein C2orf72	C2orf72
12.2127	12.1344	15.2638	13.1664	11.9137	14.9915	12.3235	14.5598	12.9508	14.1068	14.9048	13.7734	13.1603	14.5644	13.0224	13.0596	15.8588	11.4861	12.1061	NA	0.223284	0.757953	-0.324644		-0.537306	Q3KRA6	3	UPF0538 protein C2orf76	C2orf76
23.4739	22.8753	22.2468	22.4053	22.3058	22.8751	22.6877	23.0093	22.3896	18.507	19.4322	20.2566	20.0509	19.501	20.2258	22.4694	21.6381	21.9147	23.2777	NA	2.80403	0.0267879	1.9692	+	3.75718	H7BZF5	1	Uncharacterized protein C2orf80 (Fragment)	C2orf80
12.0146	12.534	14.7131	13.9595	11.8931	11.937	12.9445	11.5209	15.2885	13.2958	11.9896	11.5126	12.3753	13.207	12.7991	13.9764	11.6657	14.7451	14.6722	NA;TISSUE SPECIFICITY: Expressed in heart (at protein level). {ECO:0000269|PubMed:23115245}.	NaN	1	0		NaN	H7BZ15;Q9BSF0	1	Small membrane A-kinase anchor protein (Fragment);Small membrane A-kinase anchor protein	C2orf88
21.1292	20.3449	22.6607	21.5118	22.6596	21.4125	21.7375	22.4671	20.813	21.8633	22.5525	22.9717	22.6157	21.288	22.6169	21.8614	21.9957	22.2853	21.0306	TISSUE SPECIFICITY: Plasma. The acylation stimulating protein (ASP) is expressed in adipocytes and released into the plasma during both the fasting and postprandial periods. {ECO:0000269|PubMed:15833747, ECO:0000269|PubMed:9555951}.	0.755994	0.367419	-0.47074		-1.41408	P01024	148	Complement C3	C3
14.2992	14.2078	13.2908	13.2237	13.7826	14.5487	15.4592	13.1597	14.2234	13.2686	12.8238	12.7982	13.6579	13.1966	13.7477	13.1733	13.8964	12.6083	11.6168	NA	2.00678	0.066689	0.942911	+	2.90559	Q5JPI3;Q5JPI3-2	6	Uncharacterized protein C3orf38;Isoform 2 of Uncharacterized protein C3orf38	C3orf38
19.3583	17.8577	19.7459	19.2169	20.0749	18.8173	20.3366	19.6844	19.7619	19.2732	18.8915	20.2407	19.801	19.1045	20.065	19.0601	19.2615	18.7829	18.5345	NA	0.168759	0.811153	0.126746		0.422413	A0A140TA32	92	Complement C4-A	C4A
18.7668	17.7278	18.6302	13.5894	18.7516	17.6288	17.7463	18.0701	17.236	17.5538	16.3506	18.7482	18.3711	18.099	17.8905	16.8888	18.0929	17.5544	17.5004	NA	0.0899545	0.900109	-0.133071		-0.240373	A0A3B3ISA6	7	Complement C4-B (Fragment)	C4B
20.4065	19.2482	21.4279	19.693	22.4481	20.374	21.889	20.9968	22.6159	19.6596	20.4976	20.926	20.8215	19.556	20.4076	20.8585	20.3932	20.1141	18.6612	TISSUE SPECIFICITY: Chylomicrons in the plasma.	1.09115	0.227328	0.821507		1.8547	P04003	31	C4b-binding protein alpha chain	C4BPA
16.5295	14.9658	17.2618	16.0771	18.9656	16.6874	17.649	16.3734	18.896	16.5868	16.4381	17.6821	17.7458	16.7568	16.6583	15.7681	15.7788	15.9608	15.6969	NA	0.55343	0.48872	0.537805		1.11679	P20851;P20851-2	6	C4b-binding protein beta chain;Isoform 2 of C4b-binding protein beta chain	C4BPB
11.9915	13.1552	13.1559	11.9655	12.4903	12.9583	14.3432	14.1252	12.3485	13.5801	14.5838	14.2662	12.7463	13.2712	14.1642	12.6608	12.6368	13.7685	12.0834	NA	0.546034	0.493494	-0.427967		-1.10531	Q8N1A6	4	UPF0462 protein C4orf33	C4orf33
17.9671	18.2684	18.9455	12.8042	17.9351	18.1409	17.5947	17.4738	16.8435	15.9498	16.7251	16.2773	16.0905	15.2412	15.7889	18.2998	17.2275	17.8383	12.5706	NA	0.785747	0.353692	1.12945		1.4554	D6RGW9;Q96KX1	1	Uncharacterized protein C4orf36 (Fragment);Uncharacterized protein C4orf36	C4orf36
16.9316	15.9619	18.092	16.709	19.0824	17.1195	19.5014	17.9347	17.6605	17.7059	17.6672	18.6523	18.2822	17.0676	18.0224	17.6347	17.7383	17.5699	16.6716	NA	0.0308976	0.961143	-0.0352996		-0.0874605	P01031	49	Complement C5	C5
13.3821	15.4861	13.5686	13.3601	11.9212	13.3016	12.5085	13.6123	14.1841	14.7194	14.7496	11.8977	12.7282	12.9668	12.7015	14.9498	13.6387	14.1081	12.4182	NA	NaN	1	0		NaN	Q49AR2	4	UPF0489 protein C5orf22	C5orf22
15.2883	15.8633	14.2822	12.4541	15.1911	14.9302	17.0938	15.9495	16.9808	15.97	14.993	11.4575	15.113	14.7891	12.9895	14.7035	14.4371	14.1728	13.9718	NA	1.01282	0.252654	1.07731		1.75598	Q7Z6I8	6	UPF0461 protein C5orf24	C5orf24
13.1891	14.4298	16.2181	13.5537	19.2338	15.8869	16.5834	16.0454	16.7169	15.0216	13.8475	2.75557	11.1365	12.3876	13.4311	14.345	15.0991	15.6848	17.3255	NA	1.05834	0.236715	2.65847		1.81361	A6NDU8	4	UPF0600 protein C5orf51	C5orf51
15.8986	14.7075	15.8571	15.6723	17.6515	15.4344	18.3526	16.2335	16.2006	15.8539	15.8797	16.7802	16.777	15.3873	16.8102	15.6349	14.6097	15.5528	12.6705	NA	0.574105	0.475342	0.627506		1.14861	P13671	31	Complement component C6	C6
13.8973	13.7402	14.2901	11.8153	14.1872	13.6802	13.3139	13.5991	14.7835	14.405	15.3351	14.4049	14.0335	14.7864	14.3844	14.6284	14.4477	13.9729	11.7323	TISSUE SPECIFICITY: Mainly expressed in hepatocytes and some weak expression in germinal center cells of lymph nodes. {ECO:0000269|PubMed:22340178}.	0.637024	0.435621	-0.512309		-1.24322	Q7Z4R8	4	UPF0669 protein C6orf120	C6orf120
12.498	14.4462	12.4536	14.8711	11.9221	14.299	14.7033	11.7617	15.5906	12.6779	11.1438	12.5803	11.9923	12.2209	13.4371	14.201	14.333	11.6125	15.0957	NA	0.538606	0.50049	0.686732		1.09373	Q5T0Z8	7	Uncharacterized protein C6orf132	C6orf132
16.3637	15.3145	12.86	13.5906	13.8827	15.0047	16.8363	15.9118	17.5911	13.4176	13.332	11.2945	12.8004	12.6487	13.4166	12.4997	13.0919	11.8786	18.1489	NA	1.66099	0.105151	2.00882	+	2.52441	O95873	3	Uncharacterized protein C6orf47	C6orf47
15.4308	15.3977	16.5618	15.8958	17.7948	16.0161	19.1316	17.1803	17.7593	15.7157	17.0453	17.8297	17.1703	15.8786	17.3605	16.2859	16.4351	16.5043	15.11	NA	0.224908	0.756583	0.262929		0.540612	P10643	33	Complement component C7	C7
13.3174	13.3606	12.012	12.8771	13.5901	12.3977	12.657	13.9015	13.0709	12.0861	11.7915	11.5336	12.7121	11.8609	13.8482	9.67098	11.3753	10.7914	12.401	NA	NaN	1	0		NaN	Q9BPX7;Q9BPX7-2	2	UPF0415 protein C7orf25;Isoform 2 of UPF0415 protein C7orf25	C7orf25
15.7416	16.8527	13.8986	16.0232	14.0538	15.4915	16.1219	15.629	16.5376	15.9093	14.477	15.5381	13.6962	15.1763	13.182	15.5883	14.5622	14.3437	18.8823	NA	0.331543	0.660146	0.458892		0.745631	C9JQV0;Q9BRJ6	8	Uncharacterized protein C7orf50 (Fragment);Uncharacterized protein C7orf50	C7orf50
17.9045	14.7639	17.3925	16.6168	18.3412	15.9978	18.1599	17.8276	16.4372	16.7897	16.7852	18.2758	17.3687	16.6561	17.1855	15.8071	16.2016	15.6263	13.3049	NA	0.552554	0.489045	0.648953		1.11543	P07357	19	Complement component C8 alpha chain	C8A
17.8545	15.1885	17.6145	16.6689	19.1363	16.7821	18.3386	17.668	16.9151	16.3178	16.1791	17.4205	16.8983	15.9767	16.953	16.8142	16.6752	16.568	15.6867	NA	1.23182	0.188212	0.802897		2.02703	P07358	19	Complement component C8 beta chain	C8B
16.3378	13.6762	16.7466	15.9238	17.088	16.5029	18.2271	17.0491	16.9782	16.7706	16.3177	17.9689	17.0739	16.4429	17.2723	15.8418	15.9784	15.4212	12.7316	NA	0.21587	0.765601	0.321352		0.522129	P07360	9	Complement component C8 gamma chain	C8G
16.2174	18.1921	14.0305	19.9771	12.1818	16.2941	17.0335	15.7077	16.3935	16.8654	15.7961	15.5692	14.3383	16.1028	12.0909	15.4967	14.942	14.213	18.6716	NA	0.415511	0.590986	0.816705		0.893356	A0A3B3IRR6;A0A3B3IT54;A0A3B3ITA3;Q9H7E9;Q9H7E9-2	6	UPF0488 protein C8orf33;UPF0488 protein C8orf33;UPF0488 protein C8orf33;UPF0488 protein C8orf33;Isoform 2 of UPF0488 protein C8orf33	C8orf33
15.2095	15.3722	16.1726	16.1833	11.5078	16.2211	17.6582	13.7018	17.7428	15.863	16.646	15.24	15.9526	16.626	17.6202	15.8522	16.9776	14.7703	17.4127	NA	0.552155	0.489086	-0.766149		-1.11481	Q6P1X6	11	UPF0598 protein C8orf82	C8orf82
19.8506	17.6317	19.8198	17.5209	20.7793	18.3253	20.9657	19.4235	19.6455	18.4093	19.066	19.4711	19.196	17.3003	18.7863	19.14	18.2755	18.5484	16.6667	TISSUE SPECIFICITY: Plasma (at protein level). {ECO:0000269|PubMed:22832194, ECO:0000269|PubMed:26841934, ECO:0000269|PubMed:8603752, ECO:0000269|PubMed:9212048, ECO:0000269|PubMed:9634479}.	0.974225	0.267947	0.8432		1.7065	P02748	29	Complement component C9	C9
14.8143	16.3857	13.6594	11.5869	10.7545	14.7829	15.3532	14.2113	13.3319	13.5505	12.715	12.1564	11.2949	12.0549	12.9713	14.7522	14.5424	14.0977	11.9886	NA	NaN	1	0		NaN	Q8IXQ3	2	Uncharacterized protein C9orf40	C9orf40
15.9175	16.1323	15.6468	15.911	16.2509	15.6542	16.5242	15.7779	16.0461	15.7151	16.0786	16.7278	16.2429	15.8813	17.0088	15.7645	15.1778	15.5823	15.1688	NA	0.083885	0.904913	0.0497674		0.225399	Q5T6V5	21	Queuosine salvage protein	C9orf64
13.7537	16.2296	13.913	17.319	14.4786	15.6918	16.2632	15.183	15.338	15.8004	15.5538	12.1725	15.3536	15.4623	13.3246	14.9134	14.9857	14.0142	16.3345	NA	0.478532	0.541914	0.560699		0.998045	Q9NZ63	5	Telomere length and silencing protein 1 homolog	C9orf78
17.4603	20.7589	23.9496	21.0467	20.6482	20.5591	20.8638	18.9453	20.4042	20.055	23.4476	22.4882	20.4557	20.4601	22.1195	22.5236	20.383	22.0504	21.822	NA	0.885467	0.305333	-1.06539		-1.59036	P00915	26	Carbonic anhydrase 1	CA1
13.0114	18.245	18.722	18.0331	16.8883	16.1494	16.8818	14.5093	17.1097	16.537	18.0118	16.067	15.9622	15.4971	16.7682	17.4848	17.157	17.9072	17.8268	TISSUE SPECIFICITY: Highly expressed in colon, kidney, prostate, intestine and activated lymphocytes. Expressed at much higher levels in the renal cell cancers than in surrounding normal kidney tissue. Moderately expressed in pancreas, ovary and testis. Expressed in sweat glands and bronchiolar epithelium (PubMed:26911677). {ECO:0000269|PubMed:26911677}.	0.189684	0.790669	-0.305238		-0.467436	O43570;O43570-2	10	Carbonic anhydrase 12;Isoform 2 of Carbonic anhydrase 12	CA12
16.2548	17.2888	11.5637	17.1067	13.0272	15.4042	13.024	15.6039	13.2156	15.6345	15.7684	12.0032	15.1841	15.5122	14.6806	15.1542	14.4905	16.0077	16.6182	TISSUE SPECIFICITY: Expressed in thymus, small intestine, spleen, prostate, ovary, colon and testis. {ECO:0000269|PubMed:14600151}.	0.204022	0.77745	-0.384361		-0.4976	Q8N1Q1	3	Carbonic anhydrase 13	CA13
18.5552	20.7218	23.0646	21.3831	19.4714	19.0246	19.8433	18.5688	20.0111	19.6882	23.2074	22.0495	21.1145	19.1826	22.8466	22.1955	19.4937	23.1372	21.3091	NA	1.17832	0.202629	-1.35088		-1.96217	P00918	25	Carbonic anhydrase 2	CA2
12.282	14.1521	15.8044	14.7029	9.49465	14.8051	14.2663	13.3039	13.3542	14.5888	15.341	17.5569	14.0189	15.1111	15.3673	15.6088	12.481	14.0357	12.5087	TISSUE SPECIFICITY: Muscle specific.	0.756065	0.367472	-1.08786		-1.41418	P07451	5	Carbonic anhydrase 3	CA3
13.4064	12.4002	12.6708	13.3296	10.9533	12.4744	13.0876	13.3409	13.4928	13.6148	12.9174	13.327	14.71	14.4858	12.7158	11.5162	12.9454	14.0363	10.5218	TISSUE SPECIFICITY: Strongest expression in heart, pancreas, kidney, placenta, lung, and skeletal muscle. Not expressed in liver.	NaN	1	0		NaN	Q9Y2D0	3	Carbonic anhydrase 5B, mitochondrial	CA5B
12.282	11.0518	15.2018	13.067	13.8049	13.0192	12.9255	13.1426	13.2914	12.3841	13.1658	12.4797	11.4828	11.9913	13.2612	11.1973	12.0155	12.7987	12.9024	NA	NaN	1	0		NaN	P43166;P43166-2	3	Carbonic anhydrase 7;Isoform 2 of Carbonic anhydrase 7	CA7
14.9769	14.1662	15.1666	12.4069	12.7684	16.2054	14.1144	14.3085	13.6758	12.6413	15.8589	11.5231	11.0952	13.0334	13.1477	15.1349	15.4797	14.0424	22.1656	NA	NaN	1	0		NaN	P35219	6	Carbonic anhydrase-related protein	CA8
16.4214	16.3069	16.4743	15.9137	11.8115	18.85	19.4107	17.7833	19.7141	18.611	4.47159	13.1154	12.3728	10.8156	13.1551	16.7124	15.8391	16.2255	16.6041	NA;TISSUE SPECIFICITY: Ubiquitous. {ECO:0000269|PubMed:21980415}.	1.24267	0.185403	3.17282		2.04009	A0A3B3ISJ3;Q9H8G2	4	Caspase activity and apoptosis inhibitor 1	CAAP1
17.1951	17.5168	17.1259	17.6828	17.2034	17.0007	16.8595	16.9421	17.0962	17.1981	17.5504	17.4815	17.2102	16.749	17.2222	17.3354	16.3861	16.9575	17.1998	NA	0.139162	0.843418	0.0512441		0.356525	Q9Y376	21	Calcium-binding protein 39	CAB39
16.918	17.1069	16.2392	15.4175	16.9026	16.7989	15.3425	16.28	17.4007	15.0444	15.5043	16.7981	16.358	15.3949	16.3141	15.8988	16.4025	16.2605	15.2174	NA	1.11159	0.221229	0.570287		1.88012	Q9H9S4	12	Calcium-binding protein 39-like	CAB39L
13.1281	14.1305	13.0153	14.0642	13.9018	14.3556	15.8141	13.5309	14.802	14.8951	13.8805	11.8101	13.0785	10.1077	16.9544	13.2843	13.5775	12.508	12.143	TISSUE SPECIFICITY: Widely expressed in different tissues. {ECO:0000269|PubMed:9655484}.	0.65693	0.422691	0.858592		1.27249	Q9Y6J0	13	Calcineurin-binding protein cabin-1	CABIN1
12.0088	10.5776	11.0888	13.8211	12.2047	13.0461	13.461	12.046	12.85	11.9337	13.2079	11.8583	11.3419	12.2811	12.8071	12.1834	14.2122	11.4036	12.414	NA;TISSUE SPECIFICITY: Detected throughout the brain, including hippocampus, cerebellum and amygdala, throughout the heart and vascular system, including ductus arteriosus, in urinary bladder, and in retina and sclera in the eye (PubMed:15454078). Expressed in brain, heart, jejunum, ovary, pancreatic beta-cells and vascular smooth muscle. Overall expression is reduced in atherosclerotic vascular …	NaN	1	0		NaN	A0A0A0MR67;A0A0A0MSA1;E9PDI6;F5GY28;F5H522;Q13936;Q13936-10;Q13936-11;Q13936-12;Q13936-13;Q13936-14;Q13936-15;Q13936-16;Q13936-17;Q13936-18;Q13936-19;Q13936-2;Q13936-20;Q13936-21;Q13936-22;Q13936-23;Q13936-24;Q13936-25;Q13936-26;Q13936-27;Q13936-28;Q13936-29;Q13936-3;Q13936-30;Q13936-31;Q13936-32;Q13936-33;Q13936-34;Q13936-35;Q13936-36;Q13936-37;Q13936-4;Q13936-5;Q13936-6;Q13936-7;Q13936-8;Q13936…	2	Voltage-dependent L-type calcium channel subunit alpha;Voltage-dependent L-type calcium channel subunit alpha;Voltage-dependent L-type calcium channel subunit alpha;Voltage-dependent L-type calcium channel subunit alpha;Voltage-dependent L-type calcium channel subunit alpha;Voltage-dependent L-type calcium channel subunit alpha-1C;Isoform 10 of Voltage-dependent L-type calcium channel subunit alp…	CACNA1C
12.9565	12.6223	13.2431	12.7922	13.4809	14.0147	13.9132	11.3556	16.9895	12.6702	11.9625	12.1145	12.8389	12.5361	12.5938	10.7342	10.7355	12.4235	12.0097	NA;TISSUE SPECIFICITY: Predominantly present in cerebellar cortex. Present in various lung tumor cell lines, while it is absent in normal lung (at protein level). Highly expressed in heart, lung, testis, pancreas and skeletal muscle. Also expressed in kidney, liver, placenta and brain. {ECO:0000269|PubMed:10766861, ECO:0000269|PubMed:11687876, ECO:0000269|PubMed:9880589}.	NaN	1	0		NaN	C9JE82;C9JVC9;Q9NY47;Q9NY47-2;Q9NY47-3;Q9NY47-4;Q9NY47-5	3	Voltage-dependent calcium channel subunit alpha-2/delta-2;Voltage-dependent calcium channel subunit alpha-2/delta-2;Voltage-dependent calcium channel subunit alpha-2/delta-2;Isoform 2 of Voltage-dependent calcium channel subunit alpha-2/delta-2;Isoform 3 of Voltage-dependent calcium channel subunit alpha-2/delta-2;Isoform 4 of Voltage-dependent calcium channel subunit alpha-2/delta-2;Isoform 5 of…	CACNA2D2
11.3781	12.2468	12.7089	13.1711	12.7757	11.5143	14.3676	12.674	14.1075	12.6968	13.0396	14.3066	13.0471	14.2078	13.2279	11.9769	12.2291	10.5975	12.2339	NA;TISSUE SPECIFICITY: Expressed mostly in brain, colon and ovary. {ECO:0000269|PubMed:8119293}.	0.0108428	0.986128	0.0152452		0.0313665	F8VNV8;P54284;P54284-2;P54284-3;P54284-4;P54284-5	4	Voltage-dependent L-type calcium channel subunit beta-3;Voltage-dependent L-type calcium channel subunit beta-3;Isoform 2 of Voltage-dependent L-type calcium channel subunit beta-3;Isoform 3 of Voltage-dependent L-type calcium channel subunit beta-3;Isoform 4 of Voltage-dependent L-type calcium channel subunit beta-3;Isoform 5 of Voltage-dependent L-type calcium channel subunit beta-3	CACNB3
20.265	13.7833	12.406	24.6909	11.7952	12.7201	13.3897	11.0455	13.9438	18.4668	18.4811	18.1873	19.0366	17.8062	17.947	11.5412	11.3008	11.0289	23.588	TISSUE SPECIFICITY: Detected in heart left ventricle. {ECO:0000269|PubMed:21127204}.	0.437515	0.573565	-1.8451		-0.930454	Q9BXT2	1	Voltage-dependent calcium channel gamma-6 subunit	CACNG6
14.1758	14.8063	13.3686	14.0835	15.2719	14.6017	15.0105	13.1588	14.7467	14.8895	15.7154	13.4816	15.5718	14.3157	14.7804	13.5235	13.2767	13.8292	13.3561	NA	0.0816363	0.907094	0.084226		0.219812	Q8WUQ7;Q8WUQ7-2	6	Cactin;Isoform 2 of Cactin	CACTIN
15.3137	15.4635	13.4073	13.6343	15.9255	14.4574	12.2772	10.4283	11.9433	14.7456	13.1027	13.5423	13.7049	13.2684	13.4381	13.006	13.0289	11.2096	13.2368	TISSUE SPECIFICITY: Ubiquitously expressed with highest expression in the mammary gland and large intestine. Highly expressed in cancer tissues and cancer cell lines. During cell cycle progression expression is high in G1/S, low in the middle of S phase, and increases again in S/G2 phase. {ECO:0000269|PubMed:19829063}.	0.279964	0.70731	0.421725		0.649252	Q86Y37;Q86Y37-4	5	CDK2-associated and cullin domain-containing protein 1;Isoform 4 of CDK2-associated and cullin domain-containing protein 1	CACUL1
17.8351	18.934	18.4388	20.6223	17.9881	18.3068	19.6715	18.2035	19.3024	19.6417	18.3406	17.9943	18.389	18.6104	18.5322	18.053	18.734	18.3291	19.4762	NA	0.249274	0.735279	0.201353		0.589496	Q9HB71	19	Calcyclin-binding protein	CACYBP
17.796	18.8029	17.7878	19.6957	18.372	18.5401	19.203	17.7991	19.0581	18.2471	17.7502	17.2398	18.1078	17.6611	17.7888	18.4464	19.0387	17.8296	18.3831	NA	1.09591	0.22577	0.512401		1.86063	F8VPD4;P27708	61	CAD protein	CAD
14.6898	12.5445	16.6118	12.5822	12.2173	13.1073	13.1216	16.4285	13.7735	11.8794	12.8253	16.2393	12.9086	10.9296	13.4809	13.1022	14.4728	13.1528	17.4216	NA	NaN	1	0		NaN	A0A087X1W8;A0A0A0MTJ8;Q9BY67;Q9BY67-3;Q9BY67-4;Q9BY67-5;X5DQS5	8	Cell adhesion molecule 1;Cell adhesion molecule 1 (Fragment);Cell adhesion molecule 1;Isoform 3 of Cell adhesion molecule 1;Isoform 4 of Cell adhesion molecule 1;Isoform 5 of Cell adhesion molecule 1;Cell adhesion molecule 1 (Fragment)	CADM1
11.4945	11.1042	15.5622	12.9998	14.6808	12.7394	12.4338	15.0027	13.8226	11.7803	14.5138	15.9728	14.1231	14.8654	16.3987	11.3785	10.989	11.0053	13.5931	TISSUE SPECIFICITY: Isoform 1 is expressed mainly in adult and fetal brain. Isoform 2 is highly expressed in adult brain and weakly expressed in placenta. In brain, Isoform 2 is highly expressed in cerebellum. {ECO:0000269|PubMed:11536053, ECO:0000269|PubMed:15893517, ECO:0000269|PubMed:18420026}.	NaN	1	0		NaN	Q8N126;Q8N126-2;Q8N126-3	11	Cell adhesion molecule 3;Isoform 2 of Cell adhesion molecule 3;Isoform 3 of Cell adhesion molecule 3	CADM3
13.8141	12.7342	15.0707	12.6224	15.0653	12.5141	13.1796	14.901	13.8063	12.8664	15.1361	17.517	15.5611	14.6384	16.3982	11.1131	13.797	13.5533	14.5618	TISSUE SPECIFICITY: Expressed in brain, prostate, brain, kidney and some other organs. {ECO:0000269|PubMed:11536053, ECO:0000269|PubMed:16261159}.	0.548083	0.491828	-0.768945		-1.10849	Q8NFZ8	6	Cell adhesion molecule 4	CADM4
11.4736	14.1531	12.8295	12.6553	12.1139	13.4817	13.3716	12.3052	12.7028	13.2954	13.8208	13.517	13.1415	14.3198	13.6778	13.9219	9.68134	12.4608	12.9149	NA;TISSUE SPECIFICITY: Specifically expressed in neural and endocrine secretory tissues. Expressed in brain and pancreas and at low level in heart. Also expressed in fetal heart, cerebellum, cerebral cortex, medulla, occipital pole, frontal and temporal lobes, and putamen, as well as weak expression in spinal cord. {ECO:0000269|PubMed:12659812}.	0.239724	0.741293	-0.287715		-0.570495	F1T0E5;Q9ULU8;Q9ULU8-3;Q9ULU8-4	17	Calcium-dependent secretion activator 1;Calcium-dependent secretion activator 1;Isoform 3 of Calcium-dependent secretion activator 1;Isoform 4 of Calcium-dependent secretion activator 1	CADPS
11.8822	12.6745	13.5213	13.2536	15.4466	13.9158	10.7717	14.7192	13.7153	13.2192	12.6646	12.4837	13.5408	11.6897	11.9309	13.8522	12.416	11.7691	14.0436	NA;TISSUE SPECIFICITY: Widely expressed. Expressed in all adult and fetal tissues examined, with the strongest expression in kidney and pancreas. In brain, it is expressed at high levels in cerebellum, to a lesser degree in cerebral cortex, occipital pole, and frontal and temporal lobes. Only weakly expressed in medulla, spinal cord and putamen. {ECO:0000269|PubMed:12659812}.	NaN	1	0		NaN	C9IYE1;Q86UW7;Q86UW7-2;Q86UW7-3	3	Calcium-dependent secretion activator 2;Calcium-dependent secretion activator 2;Isoform 2 of Calcium-dependent secretion activator 2;Isoform 3 of Calcium-dependent secretion activator 2	CADPS2
14.962	19.2904	17.8943	15.4519	15.6929	15.4209	13.4803	16.5908	15.2236	13.8752	18.2841	18.2041	16.8258	14.7848	17.5837	10.8381	14.2128	14.9899	14.2124	TISSUE SPECIFICITY: Brain.	0.280784	0.706595	0.619682		0.650822	P22676	18	Calretinin	CALB2
15.2872	15.0215	13.8606	14.8624	14.662	14.3661	13.0647	15.6143	12.9839	12.7726	12.2456	14.8953	14.2524	14.7438	15.2642	14.3977	14.2231	13.198	12.9556	NA	0.573798	0.475554	0.518807		1.14814	Q9P1Z2;Q9P1Z2-2;Q9P1Z2-3;Q9P1Z2-4	1	Calcium-binding and coiled-coil domain-containing protein 1;Isoform 2 of Calcium-binding and coiled-coil domain-containing protein 1;Isoform 3 of Calcium-binding and coiled-coil domain-containing protein 1;Isoform 4 of Calcium-binding and coiled-coil domain-containing protein 1	CALCOCO1
15.5472	16.8618	15.9157	16.7098	16.3744	16.0673	16.4626	16.3476	16.6249	14.5202	15.5524	15.5871	15.3483	13.5185	16.7155	15.4393	15.9428	15.7274	15.5942	TISSUE SPECIFICITY: Expressed in all tissues tested with highest expression in skeletal muscle and lowest in brain. {ECO:0000269|PubMed:7540613}.	2.05644	0.0619971	0.928888	+	2.95944	Q13137;Q13137-3;Q13137-4	14	Calcium-binding and coiled-coil domain-containing protein 2;Isoform 3 of Calcium-binding and coiled-coil domain-containing protein 2;Isoform 4 of Calcium-binding and coiled-coil domain-containing protein 2	CALCOCO2
16.9418	16.7715	16.8224	13.6617	19.7231	18.2302	18.0394	18.6763	17.7622	22.1705	19.4697	19.3718	21.0656	21.3405	20.1053	17.8322	18.2562	17.412	11.5523	NA	0.660902	0.419983	-1.45445		-1.2783	C9J813	4	Caldesmon (Fragment)	CALD1
11.6394	11.9729	13.7799	12.9808	14.2522	12.8652	13.5726	14.286	14.324	12.6638	13.0758	12.7426	11.9767	12.6968	13.8979	11.5816	10.908	11.9071	10.8233	NA	1.51699	0.128515	1.06962	+	2.36132	Q9HA72;Q9HA72-2;Q9HA72-3	1	Calcium homeostasis modulator protein 2;Isoform 2 of Calcium homeostasis modulator protein 2;Isoform 3 of Calcium homeostasis modulator protein 2	CALHM2
15.6053	12.5693	13.0977	14.2235	16.3872	13.8192	17.2716	15.7989	16.6491	13.0672	12.6713	12.5006	12.2795	12.4231	13.4816	10.775	12.4551	10.9777	11.9263	NA	3.66218	0.014209	2.79114	+	4.67449	Q8N5C1	3	Calcium homeostasis modulator protein 5	CALHM5
22.8435	23.1615	22.9057	23.3798	23.4046	22.53	23.7008	22.833	22.9329	22.4635	23.1605	23.3263	22.6202	22.5618	23.1781	22.2996	22.324	22.601	23.3176	NA	0.911735	0.293684	0.291628		1.62509	P0DP23;P0DP24;P0DP25	29	Calmodulin-1;Calmodulin-2;Calmodulin-3	CALM1
12.1033	11.9724	11.6697	20.3032	11.5662	13.0293	13.3146	20.2527	13.8073	13.6188	12.7108	10.9456	11.4379	11.6647	13.6186	12.2965	13.9215	12.2295	11.8965	TISSUE SPECIFICITY: Expressed in normal mammary, prostate, cervical, and epidermal tissues. It is greatly reduced or undetectable in transformed cells. {ECO:0000269|PubMed:2217169}.	NaN	1	0		NaN	P27482	4	Calmodulin-like protein 3	CALML3
17.8975	18.6799	18.6553	19.6423	13.467	18.6109	17.1508	15.3332	17.1318	17.3537	18.7273	14.9949	15.3808	16.8087	16.7188	17.8991	17.5191	18.3909	20.1846	TISSUE SPECIFICITY: Expressed in breast cancer cell lines. {ECO:0000269|PubMed:12747765}.	0.000539719	0.999394	-0.00126041		-0.00157964	Q96GE6	7	Calmodulin-like protein 4	CALML4
15.4803	14.1468	15.9872	17.0695	17.5364	17.0186	13.1527	11.3312	14.4112	13.4512	12.1866	13.271	12.0757	12.4016	13.3139	15.8592	15.3032	15.3654	14.6026	TISSUE SPECIFICITY: Particularly abundant in the epidermis where its expression is directly related to keratinocyte differentiation. Very low expression in lung.	NaN	1	0		NaN	Q9NZT1	2	Calmodulin-like protein 5	CALML5
20.3225	20.5942	20.6402	20.7245	21.0715	20.4728	20.9455	20.4761	22.2192	20.5339	20.8754	20.4152	20.4579	20.0943	19.8766	20.7794	20.1187	20.8895	20.8898	NA	0.847811	0.322069	0.336536		1.54	P27797	84	Calreticulin	CALR
17.6219	17.683	17.4895	18.0936	19.4639	17.7527	17.4362	16.9842	19.0375	17.7051	16.9486	16.6566	16.7589	17.1204	16.8465	17.8667	17.3509	17.5879	17.8806	TISSUE SPECIFICITY: Ubiquitously expressed. Expressed at high levels in heart, placenta and skeletal muscle, at lower levels in lung, kidney and pancreas and at very low levels in brain and liver.	1.45393	0.137495	0.67916	+	2.28883	O43852-2;O43852-4	2	Isoform 2 of Calumenin;Isoform 4 of Calumenin	CALU
13.6831	13.5214	16.0444	15.0021	14.283	12.2595	12.5406	16.234	13.838	15.8808	15.2015	16.2522	15.338	15.3146	15.8085	13.6695	13.9791	14.3162	12.1316	TISSUE SPECIFICITY: Widely expressed. Expressed in cells of the zona glomerulosa of the adrenal cortex. {ECO:0000269|PubMed:12193581, ECO:0000269|PubMed:17056143}.	0.504208	0.525159	-0.632979		-1.0394	Q14012	6	Calcium/calmodulin-dependent protein kinase type 1	CAMK1
16.0243	15.9923	16.3688	16.7067	15.4716	15.7166	16.3614	15.5008	17.1931	15.8963	16.6552	16.6486	16.047	16.0989	16.26	15.8904	14.9701	16.0751	15.2672	TISSUE SPECIFICITY: Widely expressed. Highly and mostly expressed in polymorphonuclear leukocytes (neutrophilic and eosinophilic granulocytes) while little or no expression is observed in monocytes and lymphocytes. {ECO:0000269|PubMed:11050006, ECO:0000269|PubMed:12935886, ECO:0000269|PubMed:15840691}.	0.28682	0.700278	0.167544		0.662345	Q8IU85;Q8IU85-2	11	Calcium/calmodulin-dependent protein kinase type 1D;Isoform 2 of Calcium/calmodulin-dependent protein kinase type 1D	CAMK1D
18.9442	18.9827	18.8875	18.737	18.9012	18.4654	20.8103	19.3654	20.4669	19.3072	20.3434	20.2367	19.253	19.6075	19.8317	18.4875	18.1697	18.9997	19.4023	TISSUE SPECIFICITY: Expressed in cardiac muscle and skeletal muscle. Isoform Delta 3, isoform Delta 2, isoform Delta 8 and isoform Delta 9 are expressed in cardiac muscle. Isoform Delta 11 is expressed in skeletal muscle. {ECO:0000269|PubMed:10189359, ECO:0000269|PubMed:16690701}.	0.0858977	0.903499	-0.0793722		-0.230382	Q13557-10;Q13557-6	23	Isoform Delta 10 of Calcium/calmodulin-dependent protein kinase type II subunit delta;Isoform Delta 9 of Calcium/calmodulin-dependent protein kinase type II subunit delta	CAMK2D
17.0452	16.9746	17.3255	17.7908	17.1997	16.6285	16.699	18.5682	16.7598	17.17	17.4232	18.3474	17.7715	18.3071	18.5607	15.8844	16.2187	16.4531	17.7967	NA;TISSUE SPECIFICITY: Expressed in skeletal muscle. {ECO:0000269|PubMed:16690701}.	0.187915	0.792084	-0.172027		-0.463676	A0A2Q3DQE3;Q13555;Q13555-2;Q13555-3;Q13555-6;Q13555-7;Q13555-8;Q13555-9	13	Calcium/calmodulin-dependent protein kinase (CaM kinase) II gamma, isoform CRA_d;Calcium/calmodulin-dependent protein kinase type II subunit gamma;Isoform 2 of Calcium/calmodulin-dependent protein kinase type II subunit gamma;Isoform 3 of Calcium/calmodulin-dependent protein kinase type II subunit gamma;Isoform 6 of Calcium/calmodulin-dependent protein kinase type II subunit gamma;Isoform 7 of Ca…	CAMK2G
13.8834	15.4208	14.6761	11.5913	15.044	14.8642	15.931	15.6718	15.6284	15.8138	14.5082	15.0863	14.6447	15.3015	14.7582	14.0124	13.2129	13.7061	12.8296	TISSUE SPECIFICITY: Expressed in brain, thymus, CD4 T-cells, testis and epithelial ovarian cancer tissue. {ECO:0000269|PubMed:12065094, ECO:0000269|PubMed:7961813, ECO:0000269|PubMed:8397199}.	0.296695	0.691764	0.358289		0.681044	Q16566	4	Calcium/calmodulin-dependent protein kinase type IV	CAMK4
12.1607	12.5549	11.7985	12.2636	14.8294	12.9829	12.9059	12.365	14.3128	11.3448	12.5572	12.84	11.7321	13.2155	13.1701	11.519	11.9717	11.0973	13.6989	TISSUE SPECIFICITY: Isoform 1 is expressed in brain, liver, muscle colon and lung. Isoform 2 is expressed in colon, testis, kidney and brain. Isoform 1 and isoform 2 are expressed in normal lymphoblastoid cells but not in lymphoblastoid cells from patients with hypotonia-cystinuria syndrome. {ECO:0000269|PubMed:15913950}.	NaN	1	0		NaN	Q7Z624	4	Calmodulin-lysine N-methyltransferase	CAMKMT
16.1445	15.1145	13.5471	13.2636	11.2908	14.3693	14.1531	14.3284	15.3068	15.3856	15.2499	14.9475	14.518	16.0388	14.8436	14.6148	14.2683	14.3441	15.587	TISSUE SPECIFICITY: Ubiquitous. Highest levels in brain, testis and ovary.	0.957795	0.27414	-0.811068		-1.68526	P49069	5	Calcium signal-modulating cyclophilin ligand	CAMLG
17.0323	18.2596	14.9013	18.5355	20.039	18.8291	18.6971	15.1124	19.6762	16.9777	16.5474	16.6319	18.281	15.7981	15.9687	16.9058	14.9188	16.5696	16.3069	NA;TISSUE SPECIFICITY: Expressed in bone marrow and testis and neutrophils.	1.34382	0.158854	1.40749	+	2.16042	J3KNB4;P49913	11	Cathelicidin antimicrobial peptide	CAMP
14.3415	14.0463	14.5607	14.5797	12.1012	14.2234	12.7931	13.2512	13.3629	12.6556	14.2994	10.9781	14.2425	11.074	12.5201	14.3464	13.0003	14.3426	13.3132	NA	0.614345	0.4497	0.61833		1.20949	Q5T5Y3;Q5T5Y3-3	6	Calmodulin-regulated spectrin-associated protein 1;Isoform 3 of Calmodulin-regulated spectrin-associated protein 1	CAMSAP1
16.2086	15.0693	14.9784	13.2179	15.7223	15.2452	15.8933	15.3062	16.3741	12.3292	11.8834	13.1358	12.2817	12.2823	13.2104	14.8599	14.3481	14.0158	14.3037	NA	3.49452	0.0165238	2.07001	+	4.49339	Q08AD1;Q08AD1-2;Q08AD1-3	4	Calmodulin-regulated spectrin-associated protein 2;Isoform 2 of Calmodulin-regulated spectrin-associated protein 2;Isoform 3 of Calmodulin-regulated spectrin-associated protein 2	CAMSAP2
15.7749	16.98	14.6847	17.1952	14.7045	16.457	16.4522	14.694	15.4566	15.8856	14.9165	10.919	12.3746	12.005	16.1261	15.2825	15.2977	14.4409	17.5185	NA	1.02221	0.24913	1.34546		1.76793	Q9P1Y5;Q9P1Y5-2	20	Calmodulin-regulated spectrin-associated protein 3;Isoform 2 of Calmodulin-regulated spectrin-associated protein 3	CAMSAP3
19.2267	19.739	19.3889	19.6239	19.4455	19.7513	20.186	19.5433	20.0703	19.6659	19.7453	19.6159	19.6439	19.4559	19.5428	19.344	19.5915	19.1303	19.744	NA	0.471131	0.546417	0.115928		0.985994	Q86VP6	67	Cullin-associated NEDD8-dissociated protein 1	CAND1
11.0929	10.6387	14.2298	12.2064	12.2973	13.0432	13.4925	15.1272	13.688	13.5012	12.4184	11.2793	12.1216	12.5703	15.5991	14.5126	10.1944	10.4175	13.3817	TISSUE SPECIFICITY: Expressed in epididymis (at protein level). {ECO:0000269|PubMed:20736409}.	NaN	1	0		NaN	O75155;O75155-2	3	Cullin-associated NEDD8-dissociated protein 2;Isoform 2 of Cullin-associated NEDD8-dissociated protein 2	CAND2
16.1162	17.9079	16.7863	17.7009	16.4024	17.1779	17.4267	14.9872	18.1076	16.6506	18.1201	16.0557	16.22	16.2254	16.4292	17.5709	17.5941	17.5163	17.8993	TISSUE SPECIFICITY: Widely expressed. {ECO:0000269|PubMed:12234496}.	0.0633716	0.925808	-0.0711444		-0.173603	Q8WVQ1;Q8WVQ1-3	17	Soluble calcium-activated nucleotidase 1;Isoform 3 of Soluble calcium-activated nucleotidase 1	CANT1
19.3974	19.9645	19.3113	20.4821	20.2271	19.8738	20.9256	19.3697	21.5104	19.1461	19.0009	19.1264	19.3901	19.5453	19.1475	19.8471	19.3792	19.8304	20.8724	NA	1.1724	0.203659	0.589433		1.95495	P27824;P27824-2	72	Calnexin;Isoform 2 of Calnexin	CANX
20.3965	20.5246	20.7416	20.5125	21.5666	20.1952	20.2959	20.7256	20.5203	21.03	21.3633	21.1574	21.1903	21.2162	20.9543	20.6808	20.0358	20.6239	20.8526	NA	0.942237	0.279538	-0.301725		-1.66504	Q01518;Q01518-2	54	Adenylyl cyclase-associated protein 1;Isoform 2 of Adenylyl cyclase-associated protein 1	CAP1
22.0098	21.1253	20.9516	20.8916	21.3593	20.3496	20.6094	21.8146	20.6651	20.8113	20.8353	23.2683	22.3071	21.6202	22.6368	18.6606	19.7077	19.1015	21.2568	NA	0.0437644	0.946506	0.0656885		0.122243	P40123	20	Adenylyl cyclase-associated protein 2	CAP2
19.5927	20.1417	18.4236	19.2009	18.6448	17.8388	20.1133	19.3061	20.3835	18.3968	18.5006	17.8342	18.6783	17.9694	17.748	18.059	17.6098	17.495	18.7512	TISSUE SPECIFICITY: Macrophages and macrophage-like cells.	2.86617	0.0255865	1.18971	+	3.82308	P40121	21	Macrophage-capping protein	CAPG
19.5038	19.8148	19.5699	19.5089	19.6436	19.5693	20.3291	19.8422	19.5754	18.9478	19.3463	19.5123	18.9305	18.762	19.4466	19.4458	19.3057	19.7373	20.9061	TISSUE SPECIFICITY: Ubiquitous. {ECO:0000269|PubMed:2400579, ECO:0000269|PubMed:3017764, ECO:0000269|PubMed:8769305, ECO:0000269|PubMed:8954105, ECO:0000269|PubMed:9271093}.	0.645348	0.431358	0.272286		1.25549	P07384	60	Calpain-1 catalytic subunit	CAPN1
11.424	13.3339	16.391	12.5601	12.9447	12.3836	12.7014	10.6541	12.7904	13.9748	12.4024	12.2062	10.8869	12.159	12.6381	12.182	11.8864	10.8473	13.5804	TISSUE SPECIFICITY: Weakly expressed in lung and testis. Weakly or not expressed in other tissues. {ECO:0000269|PubMed:11675017}.	NaN	1	0		NaN	Q6MZZ7;Q6MZZ7-2	2	Calpain-13;Isoform 2 of Calpain-13	CAPN13
12.0916	18.775	17.4831	12.1353	12.1897	12.5738	12.2293	16.117	11.236	13.4327	11.7044	13.1493	12.2733	12.2679	12.7402	13.3102	18.5494	14.5827	14.3459	TISSUE SPECIFICITY: Widely expressed with higher expression in brain. {ECO:0000269|PubMed:9722942}.	0.07932	0.90979	0.234492		0.214033	O75808	4	Calpain-15	CAPN15
18.3016	18.1814	18.5262	18.5912	18.105	17.515	18.144	18.0362	17.9612	17.7925	18.3575	18.2792	18.236	17.1895	18.152	18.4172	16.6589	18.1328	18.5615	TISSUE SPECIFICITY: Ubiquitous.	0.344655	0.64877	0.173589		0.769399	P17655	48	Calpain-2 catalytic subunit	CAPN2
16.1235	15.8486	17.3916	16.9943	16.8594	16.1023	16.6758	14.8539	17.6345	16.1625	17.5973	16.4857	16.1794	16.3758	17.024	16.5747	15.2971	16.8192	18.1378	NA;TISSUE SPECIFICITY: Expressed in many tissues. Strong expression in the photoreceptor cells of the retina, with a punctate pattern of labeling over the nuclei and inner segments with less expression along the other segments and outer plexiform layer. {ECO:0000269|PubMed:23055945}.	0.177097	0.803204	-0.16715		-0.4405	E7EV01;O15484	31	Calpain-5	CAPN5
11.8354	15.4813	15.0444	11.5415	12.8197	14.1637	13.4059	14.6042	13.8163	15.7586	13.8005	14.1609	14.2365	14.7062	15.1818	14.9412	14.7526	14.2514	12.7015	TISSUE SPECIFICITY: Expressed only in placenta.	0.880876	0.307371	-0.81441		-1.58426	Q9Y6Q1	8	Calpain-6	CAPN6
13.881	15.6648	14.2355	13.3675	16.821	15.2888	16.3733	15.7901	16.3482	16.5236	14.7241	15.3242	14.7726	14.4954	14.9849	15.445	15.3175	14.9361	14.3075	TISSUE SPECIFICITY: Ubiquitous.	0.212337	0.769362	0.224718		0.514851	Q9Y6W3	16	Calpain-7	CAPN7
15.3797	15.7637	14.8991	13.5158	11.9357	15.0822	13.2649	11.7209	12.153	12.6229	15.498	14.4293	13.949	14.6186	12.168	14.2598	14.3056	15.1486	19.5062	TISSUE SPECIFICITY: Expressed predominantly in stomach.	0.534726	0.503098	-0.904489		-1.08766	O14815	12	Calpain-9	CAPN9
21.0529	20.8743	21.0816	21.3661	21.0048	20.8143	21.452	21.0229	21.3361	20.821	21.4051	20.8147	20.8181	20.2112	20.7468	20.9756	20.4335	21.177	22.1978	NA	0.344945	0.649126	0.151572		0.769922	A0A0C4DGQ5;P04632	29	Calpain small subunit 1	CAPNS1
18.228	19.1587	18.4654	20.4031	18.5617	18.6828	18.0707	17.7512	18.3405	19.3063	18.0947	18.4452	18.937	18.584	18.3719	18.5034	19.0663	18.4359	20.0794	TISSUE SPECIFICITY: Ubiquitous.	0.20094	0.78031	-0.153275		-0.491162	Q14444;Q14444-2	26	Caprin-1;Isoform 2 of Caprin-1	CAPRIN1
12.8062	12.1685	16.7346	17.512	12.2583	11.9702	12.8057	14.6362	15.0973	15.0511	15.8552	16.0751	11.2239	12.8256	15.0156	12.7333	14.7992	15.7289	11.0622	NA	0.0144855	0.981264	-0.0382391		-0.0417352	Q13938;Q13938-4	7	Calcyphosin;Isoform 3 of Calcyphosin	CAPS
16.8993	16.3342	18.1116	18.7739	17.6508	17.1546	17.5957	18.726	17.6729	18.4854	18.3954	18.2405	18.0193	18.7133	17.671	17.2715	17.4727	18.1126	18.1582	NA	0.702455	0.396643	-0.396336		-1.33837	P52907	16	F-actin-capping protein subunit alpha-1	CAPZA1
20.9428	20.6813	21.1801	20.0932	20.9569	20.2375	20.8622	21.5414	20.8753	20.449	21.157	21.169	20.753	20.8986	20.7393	20.3738	20.3483	20.6647	21.7326	NA	0.0165311	0.978951	-0.00953742		-0.0475219	P47755	20	F-actin-capping protein subunit alpha-2	CAPZA2
18.2535	15.6202	12.5656	13.208	13.0023	11.5856	13.8897	18.7732	13.5192	13.5783	12.1101	19.1159	17.9288	19.0097	19.6504	11.2449	10.8217	10.5926	13.338	NA	NaN	1	0		NaN	P47756	2	F-actin-capping protein subunit beta	CAPZB
12.2277	11.9894	10.7826	13.8679	13.0798	11.3831	12.4559	12.0324	13.1847	12.8545	14.5412	12.2891	16.0353	12.6596	12.9134	11.1287	11.3204	11.2585	14.4712	lower levels in intestine, placenta, muscle and lung. Also found in fetal lung, liver and kidney.;TISSUE SPECIFICITY: Detected in adult heart, kidney and liver	0.473701	0.546071	-0.613474		-0.990186	Q9BWT7	4	Caspase recruitment domain-containing protein 10	CARD10
16.4551	15.9878	14.2005	16.9208	15.3129	15.1115	14.8155	14.8342	13.5274	12.2913	11.5575	12.3029	10.5203	12.5702	11.4265	14.7945	13.4569	13.9893	15.6958	TISSUE SPECIFICITY: Detected in adult peripheral blood leukocytes, thymus, spleen and liver. Also found in promyelocytic leukemia HL-60 cells, chronic myelogenous leukemia K-562 cells, Burkitt's lymphoma Raji cells and colorectal adenocarcinoma SW480 cells. Not detected in HeLaS3, MOLT-4, A-549 and G431 cells. {ECO:0000269|PubMed:11278692}.	2.78852	0.027209	2.38009	+	3.74073	Q9BXL7	6	Caspase recruitment domain-containing protein 11	CARD11
14.665	15.4058	16.0274	13.2156	15.4157	14.8505	14.4403	16.2231	15.5204	15.4772	15.3911	14.2062	15.9639	16.0376	15.41	14.916	14.7685	16.2872	15.7275	TISSUE SPECIFICITY: Widely expressed. Expressed at higher level in placenta, spleen, lymph node and bone marrow. Weakly or not expressed in thymus. {ECO:0000269|PubMed:11432859, ECO:0000269|PubMed:11536016}.	0.4361	0.574884	-0.333636		-0.928087	Q5EG05;Q5EG05-2	4	Caspase recruitment domain-containing protein 16;Isoform 2 of Caspase recruitment domain-containing protein 16	CARD16
17.5345	16.9072	16.5911	17.9548	16.2061	15.8934	18.1412	16.2308	17.4338	12.5634	13.0803	12.8923	13.8058	12.1339	13.6452	15.9139	16.1026	15.8	17.1608	TISSUE SPECIFICITY: Expressed in ovary, testis, placenta, skeletal muscle, kidney, lung, heart and liver (at protein level). Expressed in thymus and brain. {ECO:0000269|PubMed:15637807}.	3.17918	0.0193806	2.67828	+	4.15575	Q96LW7-2	6	Isoform 2 of Caspase recruitment domain-containing protein 19	CARD19
16.7829	16.5554	15.9363	15.4042	15.8011	16.6818	17.1054	17.747	16.0887	17.0182	16.8971	17.5217	15.3216	17.2659	16.3466	16.7733	16.826	16.5854	16.5455	NA	0.383358	0.615388	-0.254272		-0.838	Q9Y2V2	9	Calcium-regulated heat-stable protein 1	CARHSP1
16.0558	16.7225	16.4343	17.1556	17.5691	17.3744	17.7027	15.7284	16.9305	15.5564	16.0999	16.2691	16.441	15.6026	15.7801	16.9705	16.1984	15.8508	16.4535	TISSUE SPECIFICITY: Overexpressed in prostate adenocarcinomas and high-grade prostatic intraepithelial neoplasia. {ECO:0000269|PubMed:15221992}.	1.91989	0.0734144	0.73037	+	2.81092	Q86X55;Q86X55-1	15	Histone-arginine methyltransferase CARM1;Isoform 1 of Histone-arginine methyltransferase CARM1	CARM1
15.9186	17.4812	16.6435	17.2986	17.0432	16.4944	17.2898	14.6869	17.3149	16.7183	17.439	15.7018	15.7731	16.2596	16.2525	16.9384	15.5382	16.3746	17.6446	TISSUE SPECIFICITY: Expressed in lung, placenta, small intestine, liver, thymus, colon, skeletal muscle, heart and brain. Higher expression in kidney. {ECO:0000269|PubMed:16054028}.	0.252254	0.732616	0.221681		0.595384	Q5VZK9	45	F-actin-uncapping protein LRRC16A	CARMIL1
12.2663	12.7247	13.4655	11.2266	12.4681	15.0001	16.4137	12.0994	14.7905	14.3005	13.839	13.054	13.7726	13.6738	14.5091	13.7671	13.2824	11.9035	8.72485	TISSUE SPECIFICITY: Expressed at higher level in kidney. Expressed at lower level in brain and skeletal muscle. {ECO:0000269|PubMed:26001783}.	0.153351	0.826646	0.301181		0.38845	Q8N4J0	3	Carnosine N-methyltransferase	CARNMT1
17.3115	17.6185	17.4302	18.2132	17.8035	17.6351	18.1181	17.5233	18.3308	17.8242	17.7862	18.0723	17.6174	17.702	17.8644	17.6391	16.5735	17.2153	17.9037	NA	0.388346	0.611723	0.156202		0.84668	P49589-3	44	Isoform 3 of Cysteine--tRNA ligase, cytoplasmic	CARS1
17.408	17.6611	17.656	19.4228	16.5123	18.8593	19.6797	15.9139	19.0723	15.8255	16.9843	15.4226	16.8586	17.455	17.3213	16.6477	18.1226	17.1253	20.3062	NA	0.699102	0.398311	0.813693		1.33357	Q9HA77	20	Probable cysteine--tRNA ligase, mitochondrial	CARS2
14.7159	16.0387	12.3732	11.6324	15.0227	14.4255	15.3207	12.9957	15.3488	14.2004	12.5124	12.2003	11.743	12.9961	12.5837	14.3803	14.0647	14.1354	14.9459	TISSUE SPECIFICITY: Widely expressed. Overexpressed in breast cancers and metastasis, as well as in gastric cancers. {ECO:0000269|PubMed:12080473}.	0.73452	0.378584	0.831951		1.38393	O15234	4	Protein CASC3	CASC3
16.0261	16.0447	16.2443	14.2052	16.7608	16.0065	17.4497	12.9132	18.5275	12.4907	16.7599	12.5096	17.7784	12.7468	15.2899	14.5013	13.2616	15.4463	14.9456	TISSUE SPECIFICITY: Highly expressed in peripheral B lymphocytes. {ECO:0000269|PubMed:21507905}.	1.04781	0.240022	1.44678		1.80034	Q96PB1	8	N-acetylneuraminate 9-O-acetyltransferase	CASD1
16.5687	16.5039	17.2444	17.0943	16.8675	16.9748	17.9303	16.8854	17.0275	17.0951	17.6498	17.0906	16.9085	17.336	17.4146	16.9342	17.0674	16.7986	18.2308	NA	0.635664	0.435703	-0.241813		-1.2412	A0A2U3TZN6	41	Peripheral plasma membrane protein CASK	CASK
15.0226	15.0039	13.8178	17.5963	15.3493	14.4024	16.1103	14.9036	14.7616	15.0491	14.1847	15.6246	15.0431	15.5504	15.2987	13.4716	14.8971	14.4816	13.8581	NA	0.558909	0.485612	0.472723		1.12526	Q8WXE0;Q8WXE0-2	10	Caskin-2;Isoform 2 of Caskin-2	CASKIN2
11.5797	14.9962	12.7747	13.8499	13.1881	13.751	13.2551	12.2073	13.7767	14.1651	13.4657	11.9762	13.2757	13.7502	14.5821	13.0061	13.5876	13.6851	13.6295	NA	0.271124	0.715629	-0.248029		-0.632237	A0A1W2PRX7;Q5FBZ0	3	Caspase-1;CASP1 nirs variant 1	CASP1
12.6996	16.0075	14.7946	16.5294	12.9576	14.5828	15.4508	14.9685	16.1149	15.6785	16.0028	15.115	15.5478	15.5753	15.7195	15.6434	14.3381	15.7421	15.8671	TISSUE SPECIFICITY: Detectable in most tissues. Lowest expression is seen in brain, kidney, prostate, testis and colon.	0.729833	0.381011	-0.622324		-1.37732	Q92851-2;Q92851-4;Q92851-6	10	Isoform B of Caspase-10;Isoform D of Caspase-10;Isoform 6 of Caspase-10	CASP10
12.977	13.0403	13.1932	12.9716	14.4133	13.3149	13.984	12.1642	14.2802	12.0153	12.4153	15.1853	12.6893	14.9956	12.2063	13.211	12.4274	12.8924	13.9208	TISSUE SPECIFICITY: Expressed in keratinocytes of adult skin suprabasal layers (from spinous layers to the stratum granulosum and stratum corneum) (at protein level). Expressed in keratinocytes of hair shaft and sebaceous glands (at protein level). In psoriatic skin only expressed at very low levels (PubMed:11175259). The p17/10 mature form is expressed in epidermis stratum corneum, the p20/p8 in…	NaN	1	0		NaN	P31944	4	Caspase-14	CASP14
12.3066	13.8875	14.3668	13.344	12.3496	12.8575	14.333	13.8433	13.4071	11.4981	12.8603	12.1191	12.2441	11.0641	12.9654	12.9257	14.0842	13.4371	14.3055	TISSUE SPECIFICITY: Expressed at higher levels in the embryonic lung, liver and kidney than in the heart and brain. In adults, higher level expression is seen in the placenta, lung, kidney, and pancreas than in the heart, brain, liver and skeletal muscle.	NaN	1	0		NaN	P42575;P42575-2	5	Caspase-2;Isoform 2 of Caspase-2	CASP2
16.9935	17.2032	17.2894	18.2225	16.395	17.5439	15.5852	16.5793	15.6487	16.4024	16.2057	16.0539	16.9221	15.594	16.9869	17.4473	17.1045	17.2402	17.0256	TISSUE SPECIFICITY: Highly expressed in lung, spleen, heart, liver and kidney. Moderate levels in brain and skeletal muscle, and low in testis. Also found in many cell lines, highest expression in cells of the immune system.	0.152114	0.828438	0.130706		0.385693	P42574	8	Caspase-3	CASP3
16.7016	16.3381	16.47	17.0282	17.7906	16.5332	17.8183	17.1505	17.7908	17.3485	16.6473	18.237	17.6088	17.0965	17.886	16.74	15.8477	16.5836	16.4031	TISSUE SPECIFICITY: Widely expressed, including in keratinocytes and colonic and small intestinal epithelial cells (at protein level). Not detected in brain. {ECO:0000269|PubMed:10986288, ECO:0000269|PubMed:22246630, ECO:0000269|PubMed:25121752, ECO:0000269|PubMed:7743998, ECO:0000269|PubMed:7797510, ECO:0000269|PubMed:7797592}.	0.0332579	0.957581	0.0291831		0.0939087	P49662	12	Caspase-4	CASP4
16.4513	12.39	16.5237	13.0042	13.0831	12.8616	12.4065	17.1707	12.6485	12.0409	18.468	17.8188	17.5009	15.9945	16.712	16.0349	13.2256	17.3883	16.4497	TISSUE SPECIFICITY: Expressed in barely detectable amounts in most tissues except brain, highest levels being found in lung, liver and skeletal muscle. {ECO:0000269|PubMed:7797592}.	1.42727	0.141663	-2.1034	+	-2.25796	P51878;P51878-2;P51878-3;P51878-5;P51878-6	2	Caspase-5;Isoform 2 of Caspase-5;Isoform 3 of Caspase-5;Isoform 5 of Caspase-5;Isoform 6 of Caspase-5	CASP5
16.2854	17.7867	17.0245	17.332	13.9154	17.1557	16.7863	15.3121	15.5362	16.814	16.7509	15.7805	15.8558	15.4889	16.2247	17.0633	17.1318	16.8751	16.6813	NA	0.103672	0.882398	-0.118368		-0.273663	P55212	14	Caspase-6	CASP6
14.6548	14.3231	15.8345	13.1501	12.924	13.7113	12.3835	15.5909	12.7569	14.8232	16.7841	15.6917	15.9631	15.5363	14.7694	14.3961	10.6312	14.4075	13.9294	NA;TISSUE SPECIFICITY: Highly expressed in lung, skeletal muscle, liver, kidney, spleen and heart, and moderately in testis. No expression in the brain.	0.559064	0.485558	-0.767744		-1.1255	A0A0A0MRL7;A0A5F9ZHZ6;P55210-4	5	Caspase-7;Caspase-7;Isoform 4 of Caspase-7	CASP7
17.8769	18.5699	17.5973	20.0132	17.8699	18.1488	18.3545	17.4154	18.1735	18.5133	18.2072	17.0267	17.3102	17.2228	17.7368	18.3485	17.9039	17.5792	19.3792	TISSUE SPECIFICITY: Isoform 1, isoform 5 and isoform 7 are expressed in a wide variety of tissues. Highest expression in peripheral blood leukocytes, spleen, thymus and liver. Barely detectable in brain, testis and skeletal muscle.	0.415137	0.591265	0.301609		0.89272	Q14790;Q14790-2;Q14790-4;Q14790-9	18	Caspase-8;Isoform 2 of Caspase-8;Isoform 4 of Caspase-8;Isoform 9 of Caspase-8	CASP8
14.6675	13.5707	12.2841	12.8363	14.9492	12.9449	13.3682	15.1414	12.7396	12.7739	13.4565	17.3436	15.5679	16.2403	15.9638	11.9137	11.4176	11.2057	12.8912	NA	NaN	1	0		NaN	O14958;O14958-2	3	Calsequestrin-2;Isoform 2 of Calsequestrin-2	CASQ2
13.9106	13.5267	13.9036	14.7748	15.0503	13.3922	12.9033	14.126	13.1154	11.803	13.7142	11.9075	14.2846	14.171	14.6268	12.4028	11.9866	12.2771	13.676	TISSUE SPECIFICITY: Widely expressed. {ECO:0000303|PubMed:26972053}.	1.02629	0.247914	0.770954		1.77311	A6NHX0	3	Cytosolic arginine sensor for mTORC1 subunit 2	CASTOR2
13.682	13.3396	11.9556	12.8885	13.1574	13.3271	16.2825	12.7531	14.2707	14.4152	13.2856	13.0393	12.5839	12.2356	11.3768	12.6352	11.8246	12.0108	13.0506	TISSUE SPECIFICITY: Expressed in heart, lung, skeletal muscle, pancreas, testis, small intestine, and stomach, but it is not detectable in the adult brain. {ECO:0000269|PubMed:16631614}.	1.05926	0.236389	0.871619		1.81477	Q86V15	7	Zinc finger protein castor homolog 1	CASZ1
19.9894	20.7696	21.4377	21.3555	20.9333	20.8741	20.6637	20.3198	20.9175	19.9591	21.2385	21.2995	20.684	20.7478	21.0205	21.3819	20.6928	21.1619	20.4431	NA	0.102821	0.883211	-0.0561536		-0.271621	P04040	48	Catalase	CAT
17.8551	16.7023	17.4503	17.2888	18.7485	12.1354	12.7574	18.2635	14.3931	17.49	12.3686	20.3334	19.2836	12.5112	19.6561	11.666	16.426	17.6549	16.2489	NA;TISSUE SPECIFICITY: Skeletal muscle, liver, stomach, lung, kidney and heart (at protein level). Expressed in the brain. {ECO:0000269|PubMed:19262564}.	0.0512472	0.93727	-0.186705		-0.14207	C9JKI3;Q03135-2	1	Caveolin (Fragment);Isoform 2 of Caveolin-1	CAV1
14.8637	14.1596	14.3665	13.0406	15.1784	14.1234	14.6618	14.7005	16.0174	15.6458	15.177	16.9892	15.7286	16.9069	15.8603	12.668	12.4349	13.617	12.8524	TISSUE SPECIFICITY: Expressed in endothelial cells, smooth muscle cells, skeletal myoblasts and fibroblasts. {ECO:0000269|PubMed:9361015}.	0.134152	0.849313	-0.220012		-0.345093	P51636-2	7	Isoform Beta of Caveolin-2	CAV2
21.6562	20.4031	19.4782	21.4724	20.1654	19.3696	20.0427	22.2496	19.7973	20.2334	20.5984	22.4618	21.5588	21.9687	21.7575	18.2583	18.9898	19.6626	20.3339	NA	0.0430369	0.947426	-0.0673547		-0.1203	Q6NZI2	26	Caveolae-associated protein 1	CAVIN1
18.7542	17.5518	18.0564	16.8383	18.0409	17.3428	18.0835	19.7978	17.5859	17.1812	18.7584	20.951	19.3677	20.1534	20.1379	15.5882	15.6955	16.1658	17.5959	TISSUE SPECIFICITY: Highly expressed in heart and lung, and expressed at lower levels in brain, kidney, liver, pancreas, placenta, and skeletal muscle. {ECO:0000269|PubMed:10191091}.	0.0794761	0.909597	-0.153745		-0.214424	O95810	21	Caveolae-associated protein 2	CAVIN2
20.419	18.7408	19.8251	19.8326	19.4416	18.6275	19.5089	21.0885	19.4086	19.0425	19.0595	20.3286	19.866	19.4077	20.0244	17.2291	17.9491	18.4746	18.5164	TISSUE SPECIFICITY: Skeletal muscle, liver, stomach, lung, kidney and heart (at protein level). Strongly expressed in mammary and epithelial cells. {ECO:0000269|PubMed:11691816, ECO:0000269|PubMed:19262564}.	0.92472	0.286964	0.664945		1.64215	Q969G5	18	Caveolae-associated protein 3	CAVIN3
12.5024	13.2109	12.3842	12.4111	12.9145	13.1441	12.8373	11.7474	12.4592	11.9093	12.1345	13.5438	11.0537	12.2162	13.4373	12.8641	14.3428	12.9304	12.5127	NA	NaN	1	0		NaN	Q68DC6	1	Protein CBFA2T2	CBFA2T2
14.5236	17.6276	16.2287	18.0395	17.8956	16.3384	18.9125	17.2451	18.5964	16.3659	16.98	16.5937	16.3433	18.3381	17.7245	16.305	15.7521	16.0134	16.1679	NA	0.604765	0.455236	0.609109		1.19512	Q13951-2	11	Isoform 2 of Core-binding factor subunit beta	CBFB
16.0279	15.8809	15.1299	20.3299	16.3398	15.2624	16.1369	16.274	17.3517	14.8827	16.2753	16.6878	16.001	15.441	17.4492	15.2273	15.1546	15.0191	18.5345	NA	0.318816	0.671395	0.458678		0.722288	A0A0U1RQX8;A0A1B0GW38;P22681	14	E3 ubiquitin-protein ligase CBL;E3 ubiquitin-protein ligase CBL (Fragment);E3 ubiquitin-protein ligase CBL	CBL
11.9864	12.4308	12.2385	13.5793	13.2436	11.2666	13.0557	10.5811	13.6527	11.9155	13.4683	14.0337	13.0431	12.1156	14.0168	13.4473	12.0803	11.1104	11.9864	NA;TISSUE SPECIFICITY: Expressed in placenta, heart, lung, kidney, spleen, ovary and testis, as well as fetal brain and liver and hematopoietic cell lines, but not in adult brain, liver, pancreas, salivary gland, or skeletal muscle. Present in lymphocytes (at protein level). {ECO:0000269|PubMed:10022120, ECO:0000269|PubMed:9399639}.	0.243468	0.739511	-0.273431		-0.577967	A0A2R8Y5E1;A0A2R8Y8D8;A0A2R8YFD4;H0Y3L9;Q13191;Q13191-2;Q13191-3	2	E3 ubiquitin-protein ligase CBL;E3 ubiquitin-protein ligase CBL;E3 ubiquitin-protein ligase CBL;E3 ubiquitin-protein ligase CBL;E3 ubiquitin-protein ligase CBL-B;Isoform Truncated 1 of E3 ubiquitin-protein ligase CBL-B;Isoform Truncated 2 of E3 ubiquitin-protein ligase CBL-B	CBLB
15.6152	16.3887	15.5528	18.091	15.0105	15.4667	16.2841	14.6801	15.8409	16.4228	16.3267	13.2315	16.6035	15.7616	15.3173	15.0317	15.5478	14.5264	15.8811	NA	0.420222	0.586727	0.416074		0.901349	C9J2P9;Q75N03;Q75N03-2	5	E3 ubiquitin-protein ligase Hakai (Fragment);E3 ubiquitin-protein ligase Hakai;Isoform 2 of E3 ubiquitin-protein ligase Hakai	CBLL1
20.3093	20.2239	19.3509	19.9171	19.9048	19.3511	20.5435	19.9122	19.6202	18.8847	20.7158	20.3573	19.8232	19.7961	20.9748	19.6193	19.2922	19.756	20.2748	TISSUE SPECIFICITY: Expressed in kidney (at protein level). {ECO:0000269|PubMed:1597188}.	0.0670328	0.922084	-0.0457346		-0.182987	P16152	23	Carbonyl reductase [NADPH] 1	CBR1
16.6205	16.3263	16.7227	14.4546	17.31	16.1101	16.5829	17.993	18.2162	15.7937	16.2553	16.9377	15.7593	16.7522	16.4795	15.3576	15.0877	15.3409	16.1158	TISSUE SPECIFICITY: Detected in ovary, pancreas, intestine, colon, kidney, brain, thymus, lung, heart, liver, spleen, leukocyte, prostate and testis. {ECO:0000269|PubMed:18493841}.	1.01113	0.253213	0.716086		1.75383	O75828	7	Carbonyl reductase [NADPH] 3	CBR3
14.1598	14.8923	15.5203	15.0893	12.0024	14.181	16.115	14.8966	17.38	15.7669	16.8463	16.4462	15.1029	15.9779	16.5097	14.9783	17.0523	14.7046	14.9155	TISSUE SPECIFICITY: Detected in liver and kidney (at protein level) (PubMed:19000905). Displays the highest expression in neuronal and muscle tissues (PubMed:25203508). {ECO:0000269|PubMed:19000905, ECO:0000303|PubMed:25203508}.	0.943622	0.27938	-0.91485		-1.66684	Q8N4T8	9	Carbonyl reductase family member 4	CBR4
17.6487	17.1281	17.8028	18.3939	17.4643	18.1116	16.4032	17.0829	16.7686	18.3969	18.297	18.7031	18.1301	18.4657	18.712	17.2591	18.3535	16.8634	17.2288	NA	1.25272	0.183312	-0.618264		-2.05216	B5MD17	7	Chromobox protein homolog 1 (Fragment)	CBX1
16.221	17.1369	16.4814	19.8153	15.5685	16.7713	16.7084	16.4063	18.6862	18.1221	17.117	17.1661	17.318	17.826	16.7873	16.7036	16.9474	16.6023	17.2871	NA	0.082161	0.906657	-0.0993002		-0.221117	Q13185	13	Chromobox protein homolog 3	CBX3
16.6911	17.0354	17.0797	22.4993	16.5776	17.4547	17.0339	16.0555	17.229	17.496	16.465	16.2979	16.8735	16.7475	16.6756	16.7401	17.075	16.1526	18.3813	NA	0.466527	0.549305	0.626912		0.978464	P45973	12	Chromobox protein homolog 5	CBX5
12.6774	12.3461	10.0632	12.5848	12.3465	11.5378	13.8912	14.5635	12.8111	12.0575	12.9961	14.293	13.046	13.3998	12.8967	12.2332	11.251	12.8426	10.8652	NA	NaN	1	0		NaN	B0QYP3;O95931	1	Chromobox protein homolog 7 (Fragment);Chromobox protein homolog 7	CBX7
14.7853	15.4402	13.6922	16.1243	12.6272	15.525	15.1276	14.2325	14.0064	14.8956	12.653	12.58	12.3977	15.0268	15.4593	14.7254	16.0297	14.2805	15.9992	NA	0.144665	0.837054	0.213126		0.368984	Q9HC52	7	Chromobox protein homolog 8	CBX8
17.0853	18.389	16.8089	18.4425	17.2046	18.047	17.8475	17.2806	17.3852	17.7303	17.571	17.3274	16.9718	17.543	17.3729	17.4257	17.4544	17.3273	16.8019	NA	0.633961	0.436152	0.257505		1.23868	Q6P1N0;Q6P1N0-2	37	Coiled-coil and C2 domain-containing protein 1A;Isoform 2 of Coiled-coil and C2 domain-containing protein 1A	CC2D1A
17.6423	17.4613	17.4174	17.3217	16.7842	17.0468	16.4265	17.5893	16.1893	17.3071	17.4677	17.4322	16.6934	17.5703	17.3856	16.8658	16.6635	16.6954	17.811	NA;TISSUE SPECIFICITY: Widely distributed in brain and peripheral tissues. {ECO:0000269|PubMed:19423080}.	0.168567	0.811373	-0.0915616		-0.421995	H7C1U3;Q5T0F9-2	18	Coiled-coil and C2 domain-containing protein 1B (Fragment);Isoform 2 of Coiled-coil and C2 domain-containing protein 1B	CC2D1B
12.5792	11.6964	12.0688	12.7577	17.9498	20.05	21.5736	11.3435	22.1594	16.54	15.1553	13.5795	15.8568	13.0036	16.22	15.3609	10.9877	14.9756	12.6228	NA;TISSUE SPECIFICITY: Strongly expressed in prostate, pancreas, kidney, lung, liver, retina, kidney, fetal brain and fetal kidney. Lower expression in spleen, small intestine, colon, skeletal muscle, ovary, thymus and heart. {ECO:0000269|PubMed:18387594, ECO:0000269|PubMed:18950740}.	NaN	1	0		NaN	A0A140T8Y7;H0Y941;Q9P2K1;Q9P2K1-2	2	Coiled-coil and C2 domain-containing protein 2A (Fragment);Coiled-coil and C2 domain-containing protein 2A (Fragment);Coiled-coil and C2 domain-containing protein 2A;Isoform 2 of Coiled-coil and C2 domain-containing protein 2A	CC2D2A
[truncated: 6,941 more rows]

## Sheet: Analysis_2
EOCRC17.PG.Quantity	EOCRC18.PG.Quantity	EOCRC20.PG.Quantity	EOCRC21.PG.Quantity	EOCRC22.PG.Quantity	EOCRC23.PG.Quantity	EOCRC24.PG.Quantity	EOCRC25.PG.Quantity	EOCRC26.PG.Quantity	N_EOCRC17.PG.Quantity	N_EOCRC18.PG.Quantity	N_EOCRC24.PG.Quantity	N_EOCRC25.PG.Quantity	SOCRC8.PG.Quantity	SOCRC9.PG.Quantity	SOCRC10.PG.Quantity	SOCRC11.PG.Quantity	SOCRC12.PG.Quantity	SOCRC13.PG.Quantity	SOCRC14.PG.Quantity	SOCRC15.PG.Quantity	SOCRC16.PG.Quantity	SOCRC17.PG.Quantity	N_SOCRC8.PG.Quantity	N_SOCRC9.PG.Quantity	N_SOCRC10.PG.Quantity	N_SOCRC11.PG.Quantity	N_SOCRC12.PG.Quantity	N_SOCRC13.PG.Quantity	C: Tissue specificity	N: -Log Student's T-test p-value EOCRC_N_EOCRC	N: Student's T-test q-value EOCRC_N_EOCRC	N: Student's T-test Difference EOCRC_N_EOCRC	Signficantly deregulated EOCRC_N_EOCRC	N: Student's T-test Test statistic EOCRC_N_EOCRC	N: -Log Student's T-test p-value SOCRC_N_SOCRC	N: Student's T-test q-value SOCRC_N_SOCRC	N: Student's T-test Difference SOCRC_N_SOCRC	Signficantly deregulated SOCRC_N_SOCRC	N: Student's T-test Test statistic SOCRC_N_SOCRC	N: -Log Student's T-test p-value N_EOCRC_N_SOCRC	N: Student's T-test q-value N_EOCRC_N_SOCRC	N: Student's T-test Difference N_EOCRC_N_SOCRC	Signficantly deregulated N_EOCRC_N_SOCRC	N: Student's T-test Test statistic N_EOCRC_N_SOCRC	T: PG.ProteinGroups	T: PG.NrOfPrecursorsIdentified	T: PG.ProteinDescriptions	T: PG.Genes
[truncated: 7,969 more rows]

[truncated: 4 more sheets: Original Matrix, GOBP Analysis, Placenta Signature, Placenta Signature_adj]
