# Supplementary figures and images for: Early-Onset Colorectal Cancers Exhibit Distinctive Placental-Like Features
Source: Research Square preprint supplement (doi:10.21203/rs.3.rs-7193450/v1), 2025-08-06

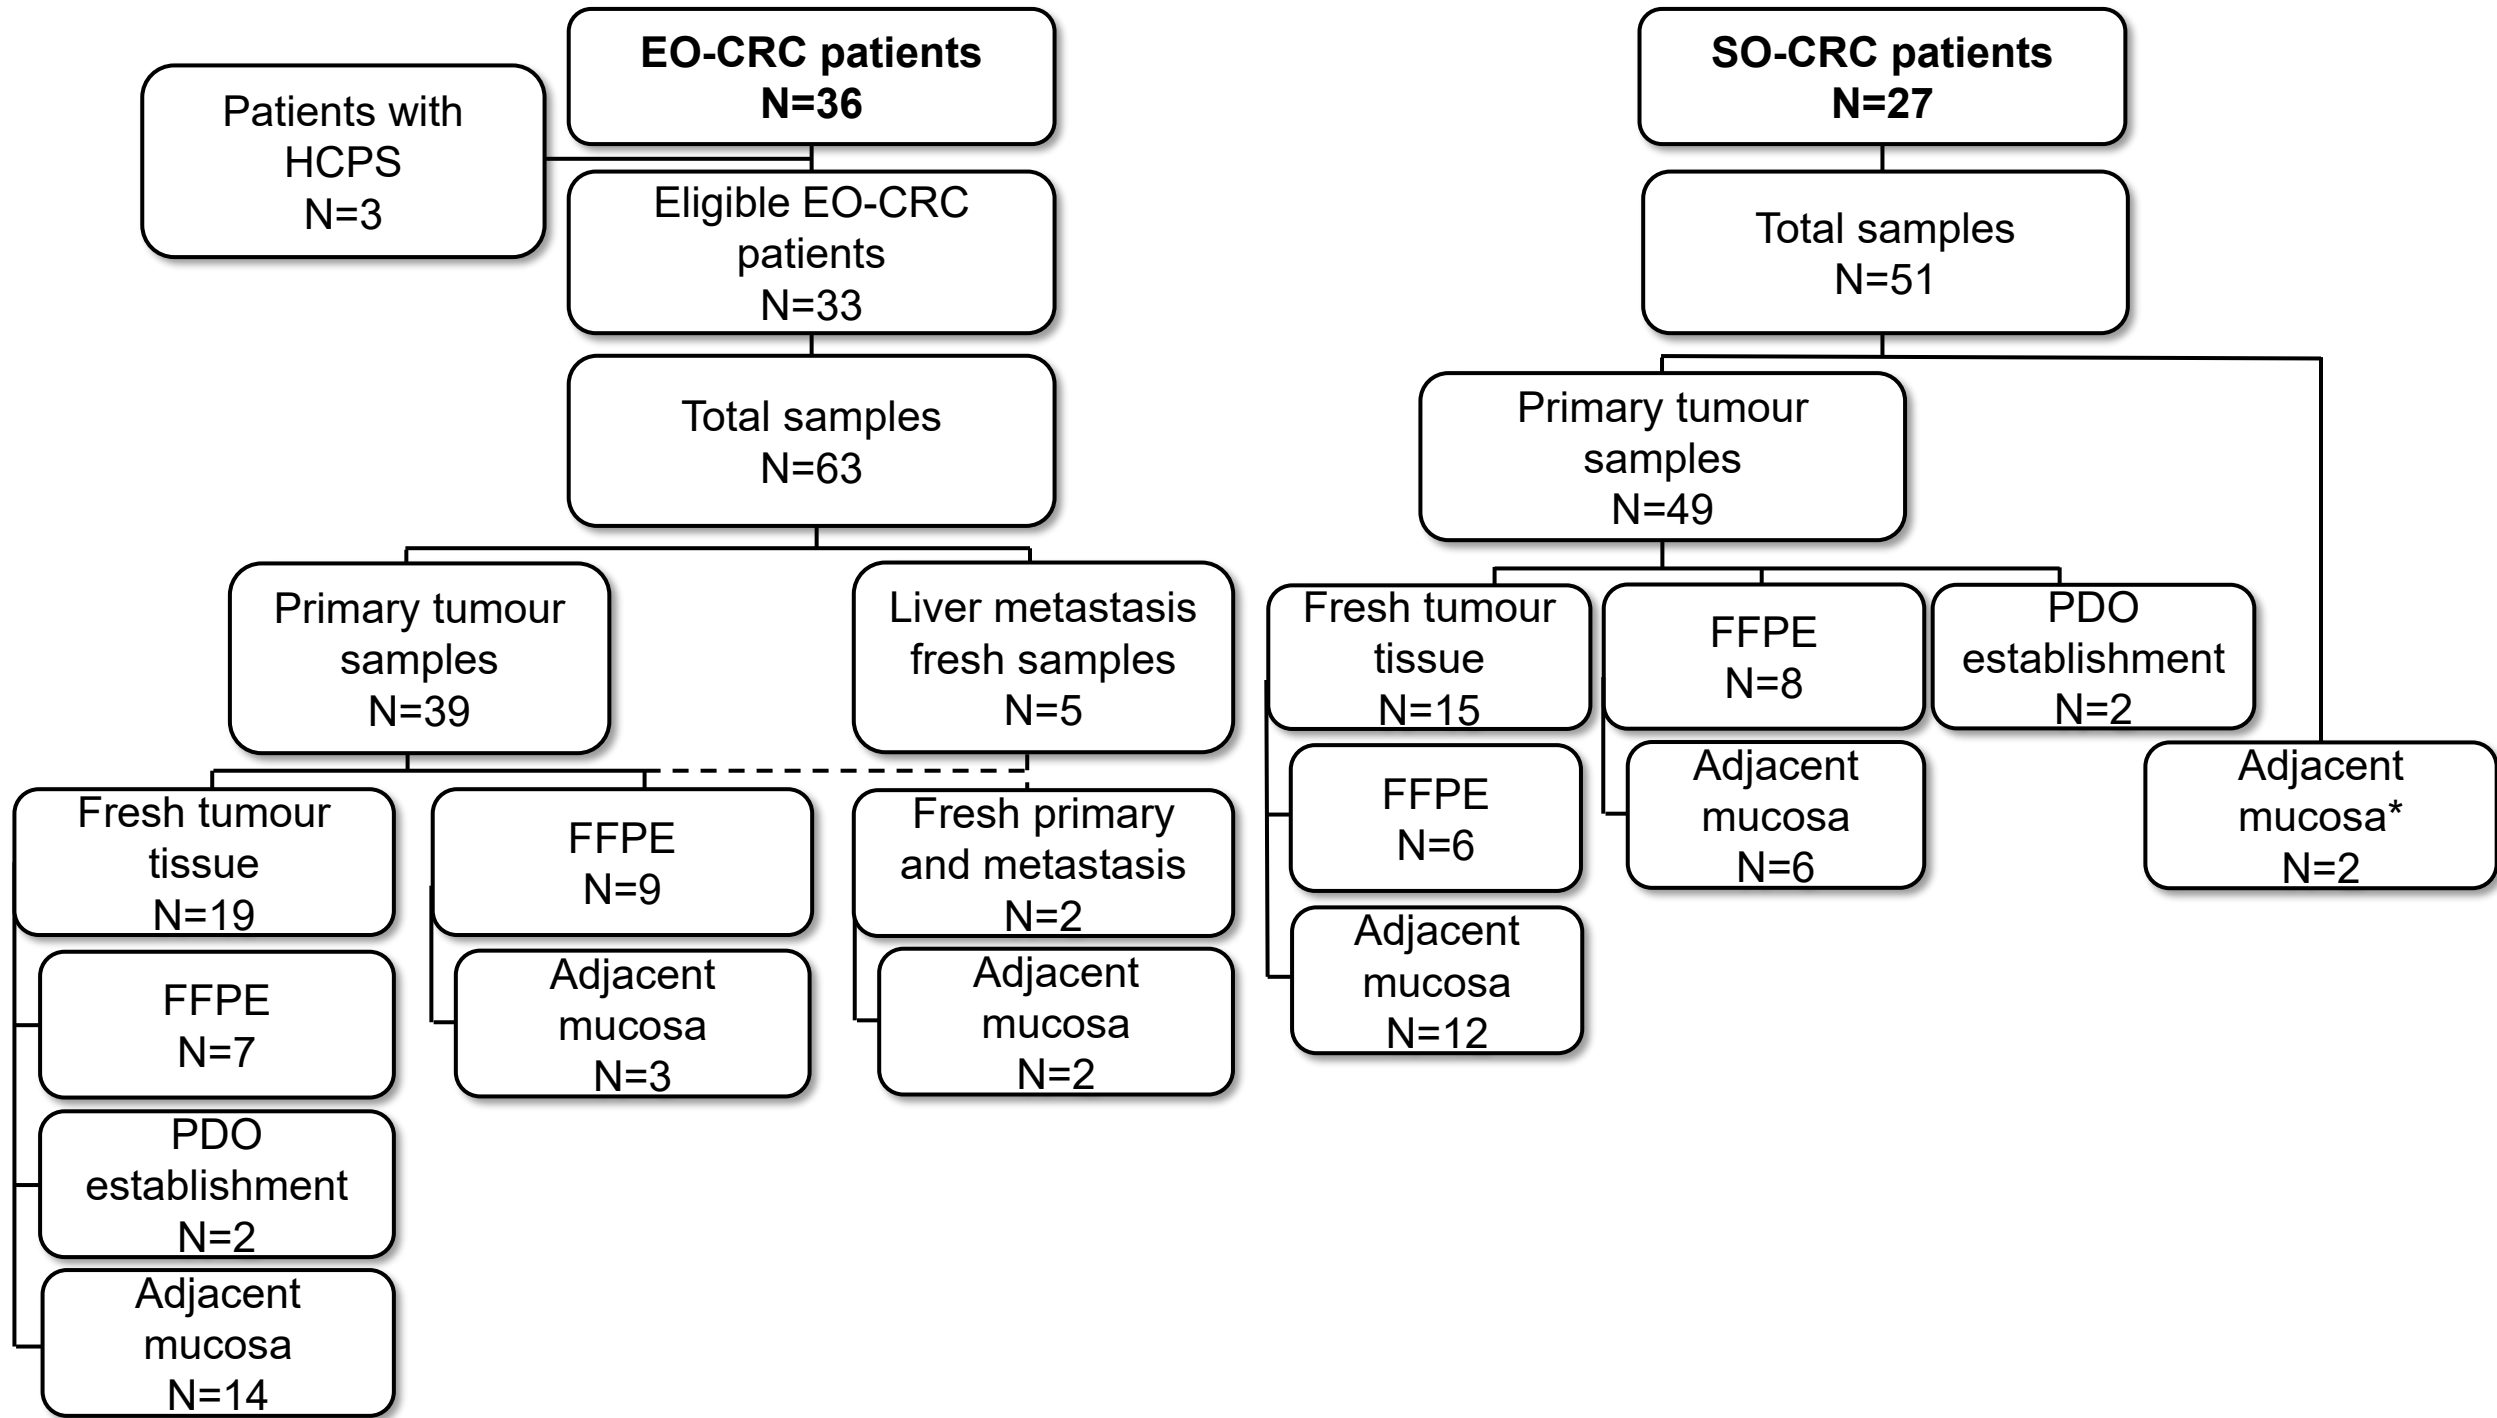

Supplement: Supplementary file 1 [file de9484252fe9a4bea7a13d89.pdf]
